# Supplementary material for: Hypoxia and low-glucose environments co-induced HGDILnc1 promote glycolysis and angiogenesis
Source: PubMed Central journal article supplement (PMC10933424; doi:10.1038/s41420-024-01903-w), 2024-03-12

Fig S1C

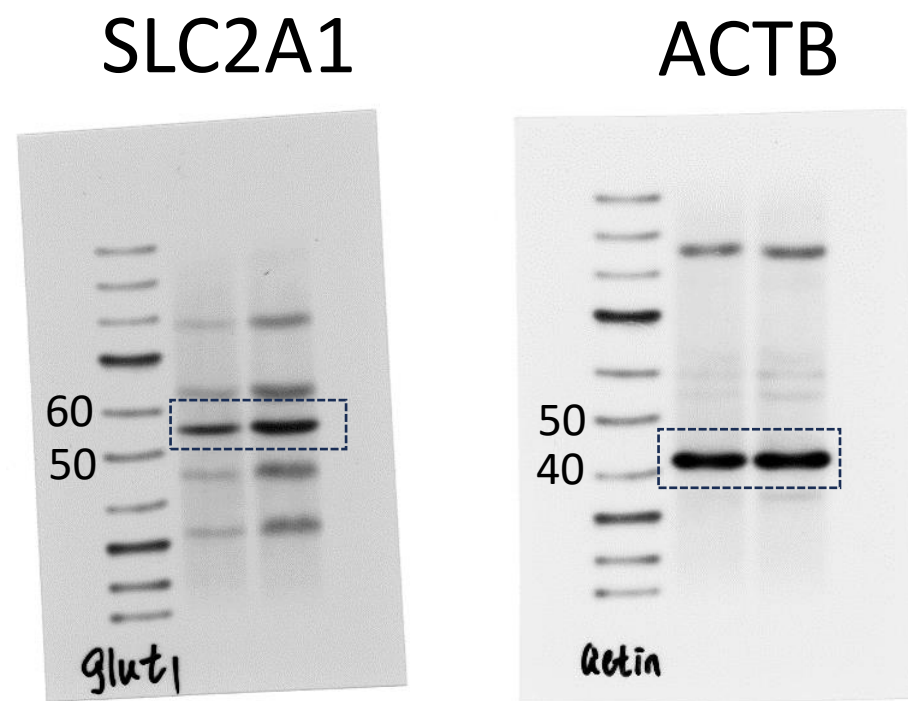

Fig S1D

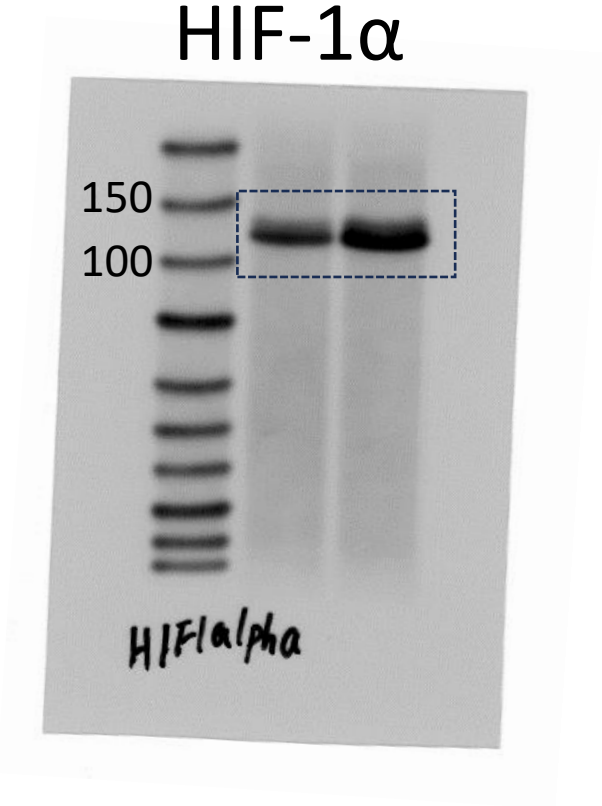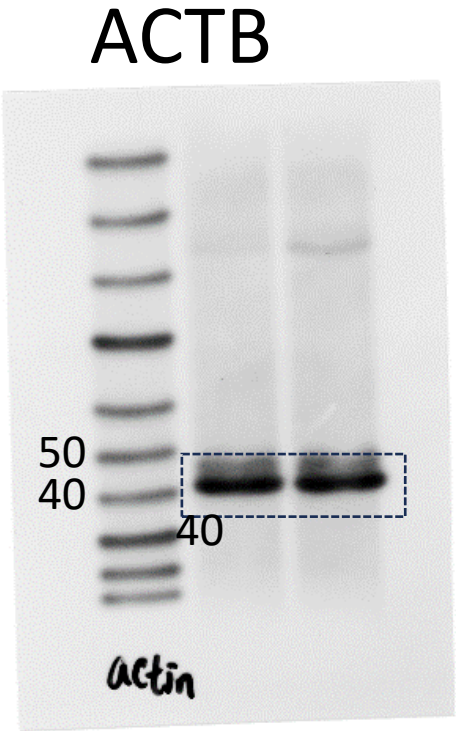

Fig 3C

NEUROD1

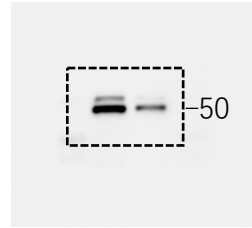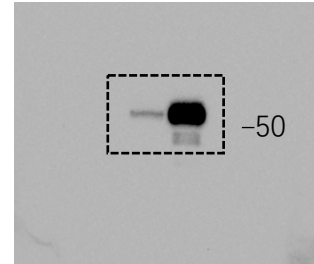

ACTB

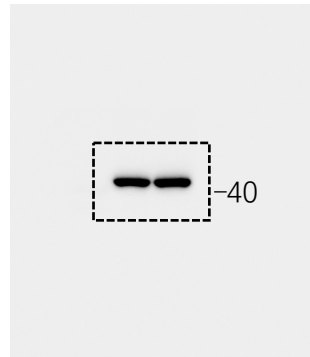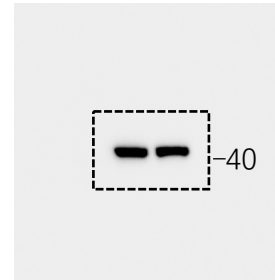

Fig 3H and Fig S3D

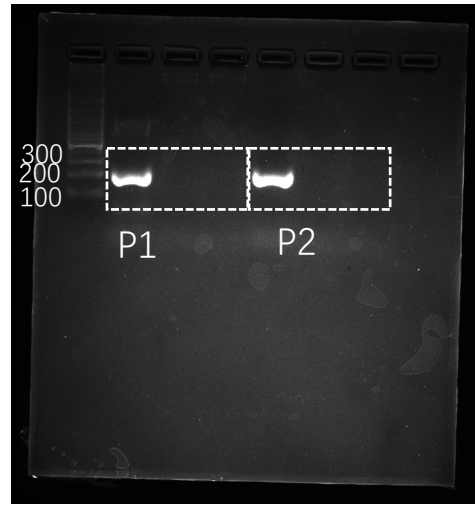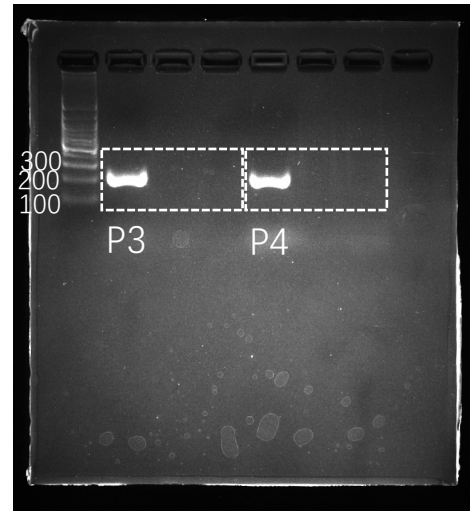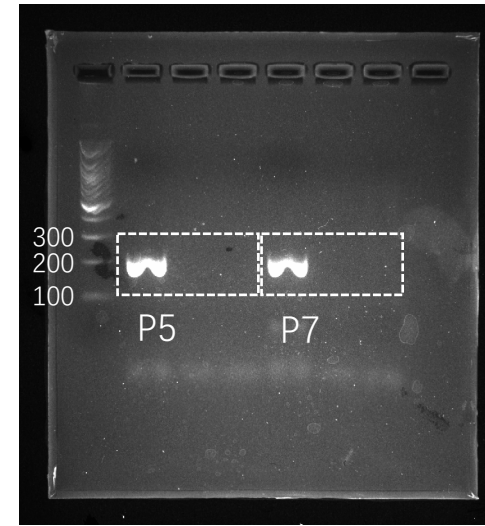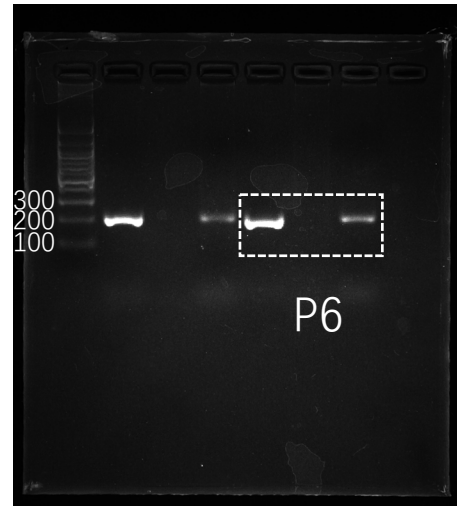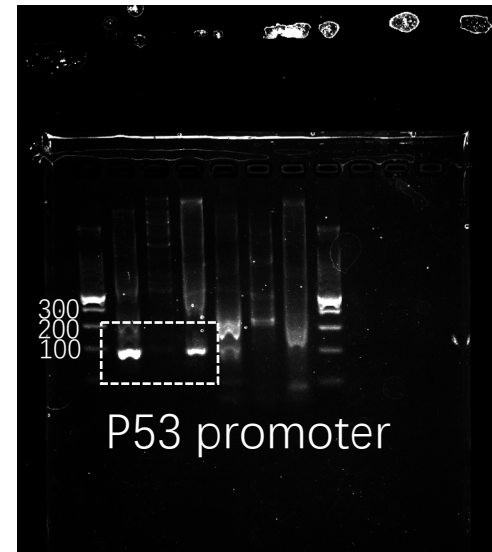

Fig 4B

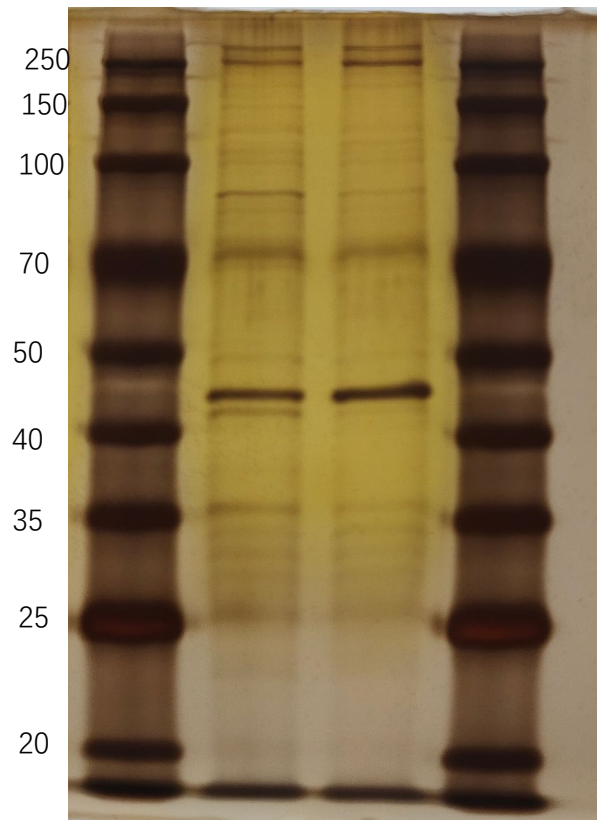

Fig 4I

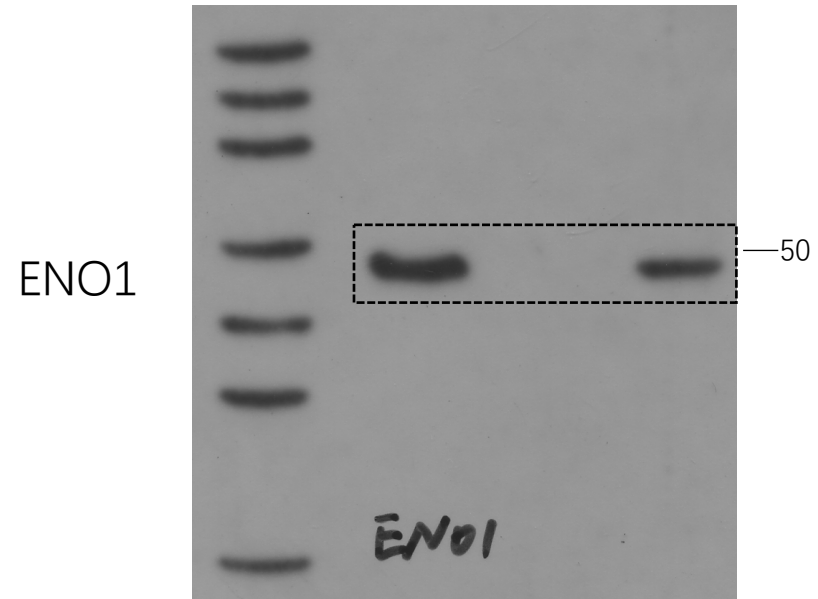

Fig 4L

ENO1

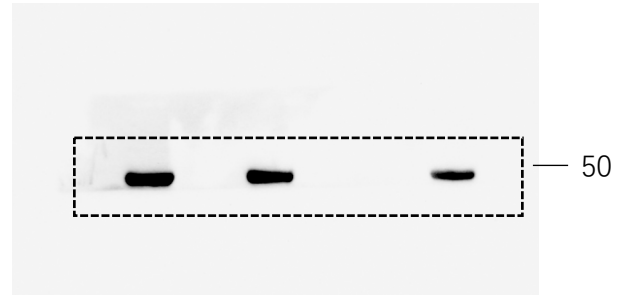

Fig 5A

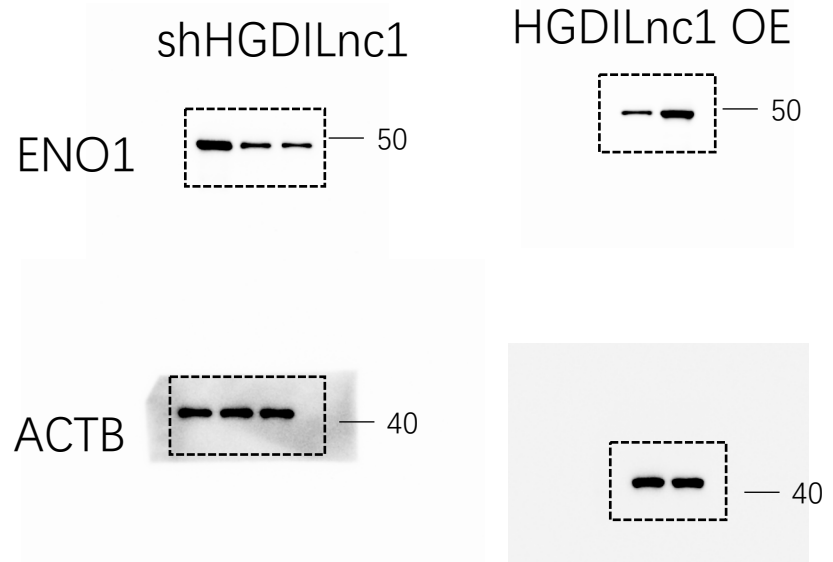



Fig 5C

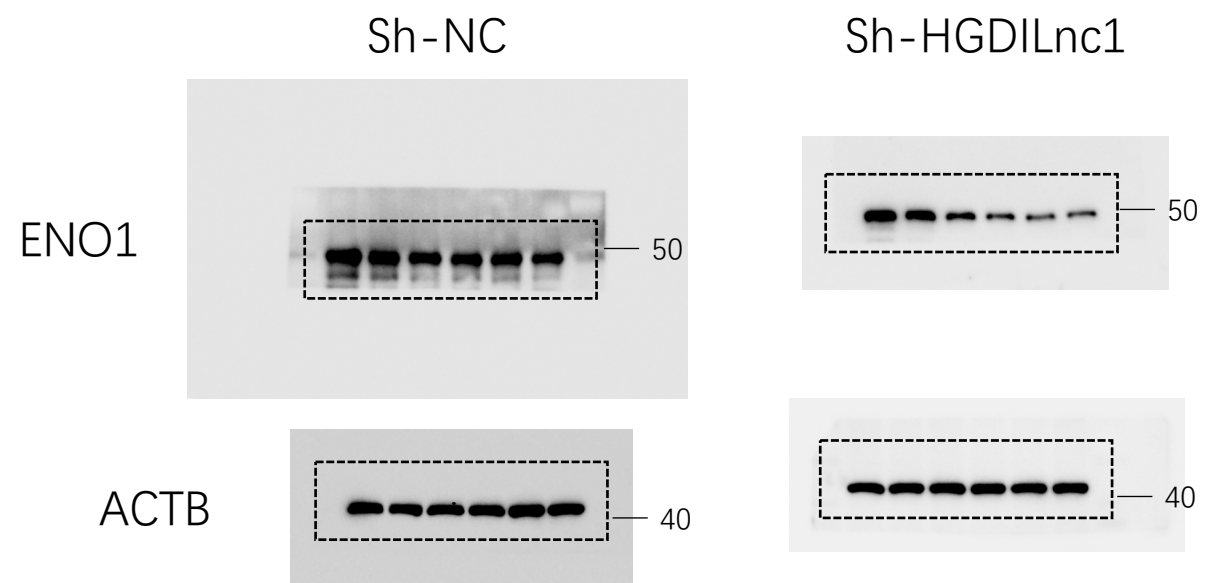

Fig 5D

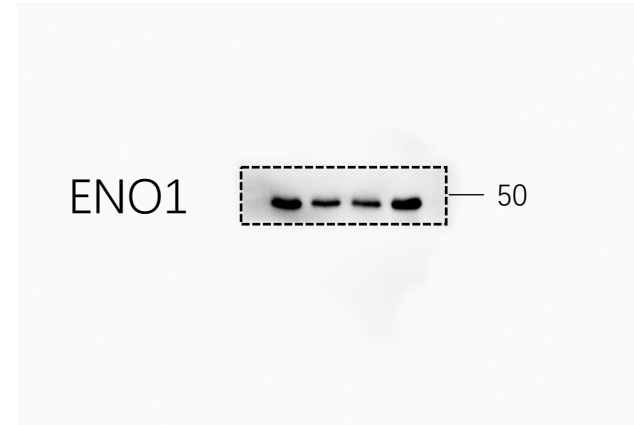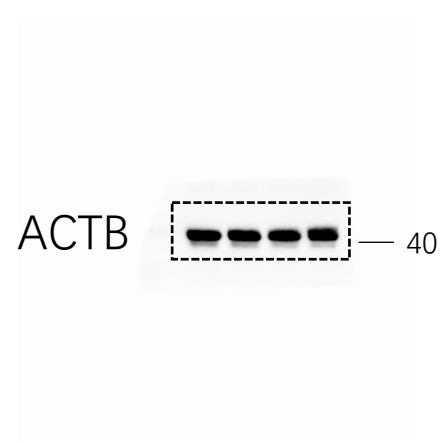

Fig 5E

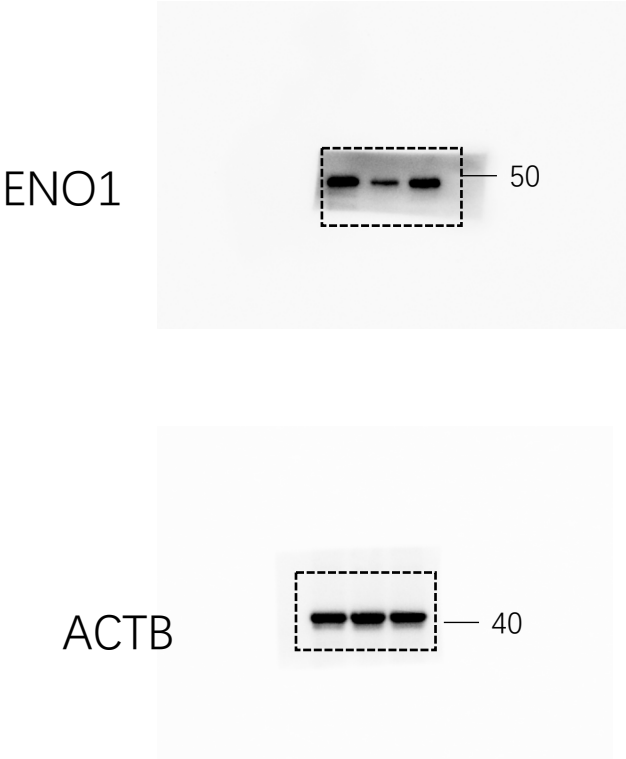

Fig 5F

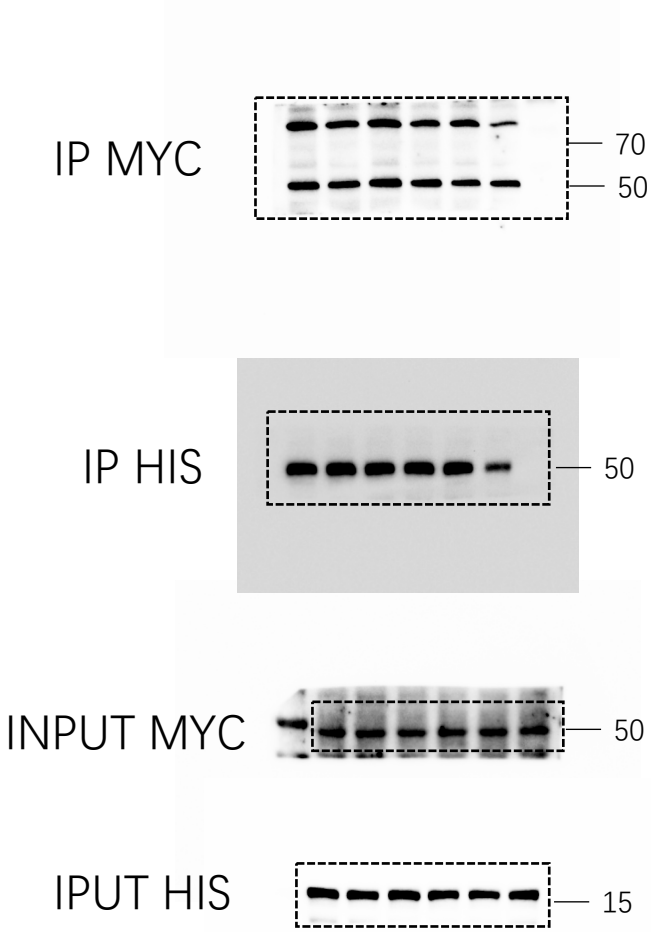

Fig 5G

IP MYC

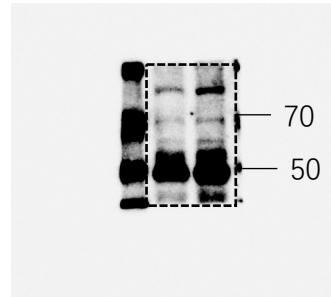

IP HIS

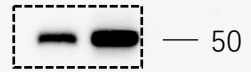

INPUT MYC

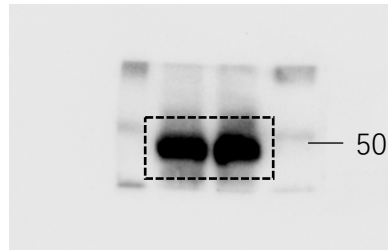

INPUT HIS

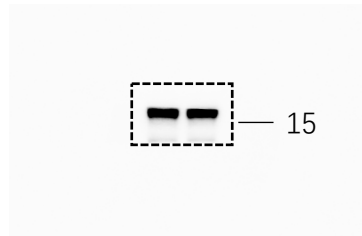

Fig 5H

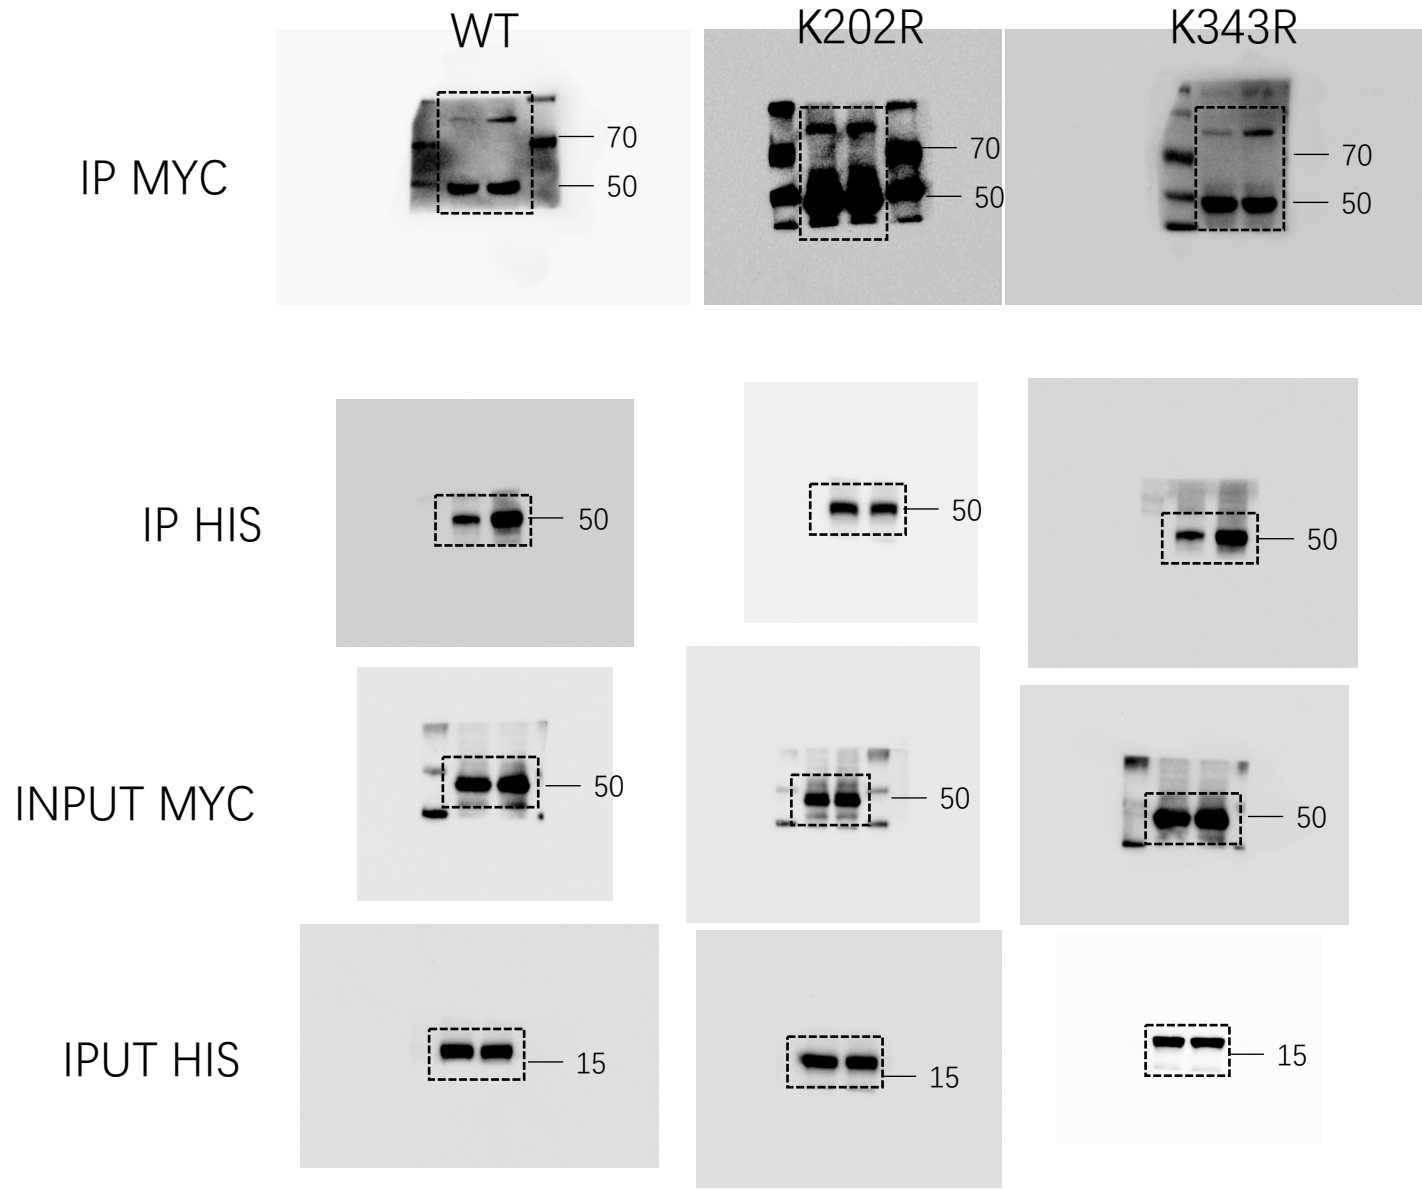

Fig 5I

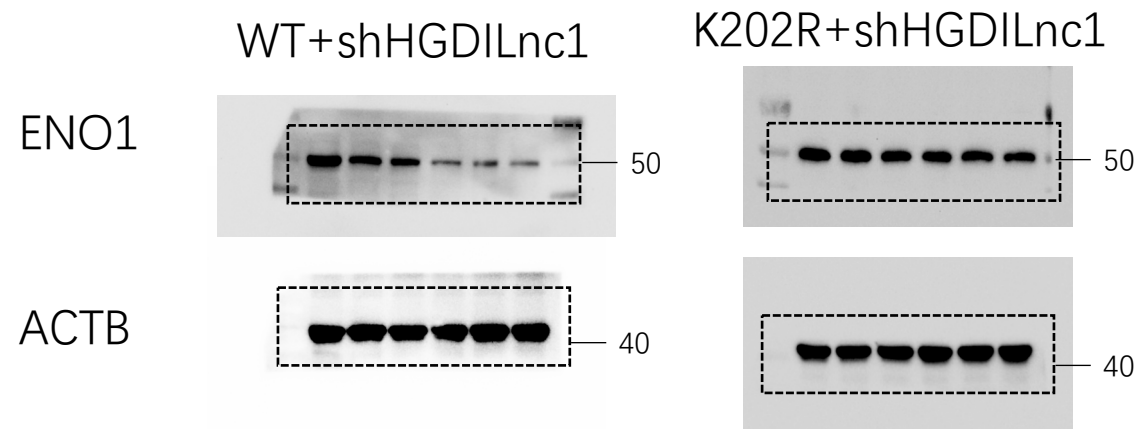

Fig 5J

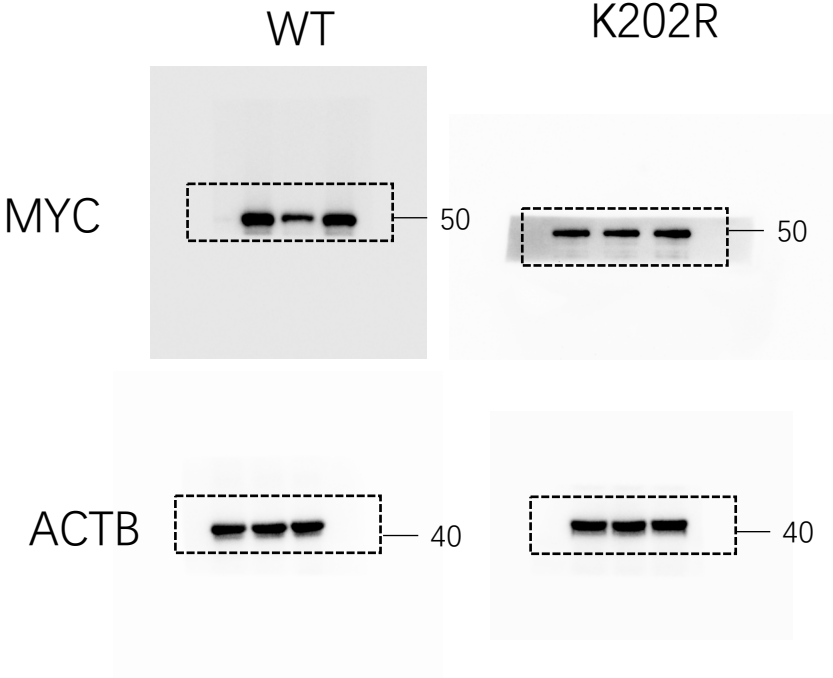



Fig 5K

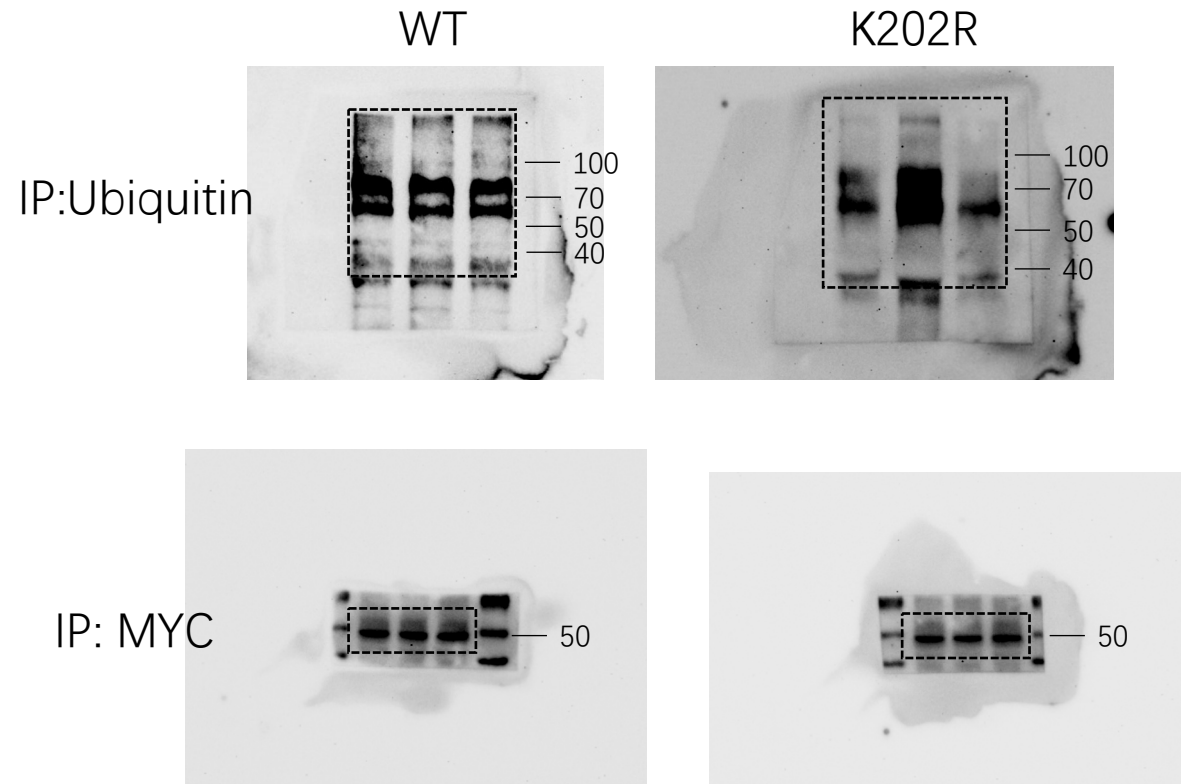

Fig S5C

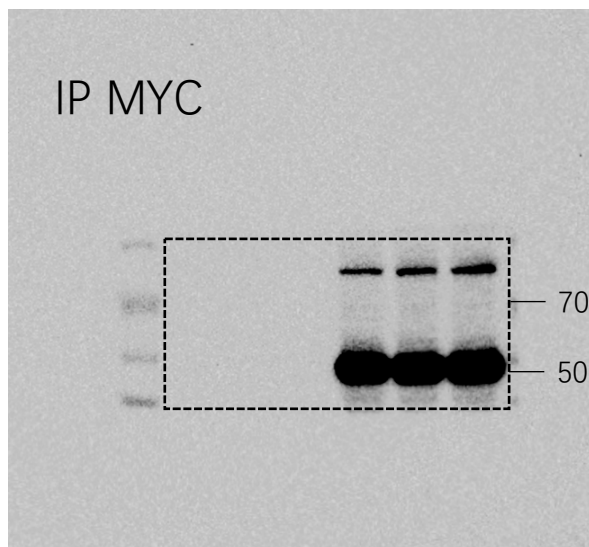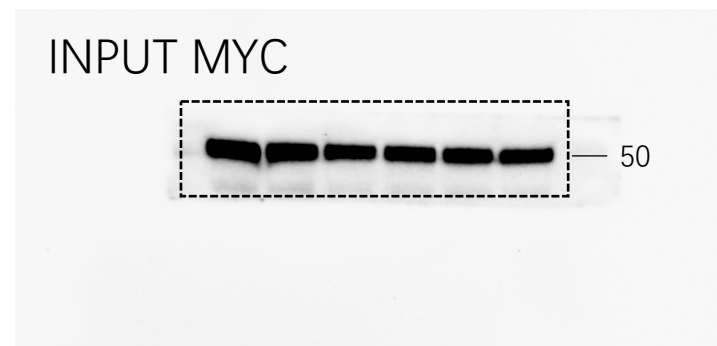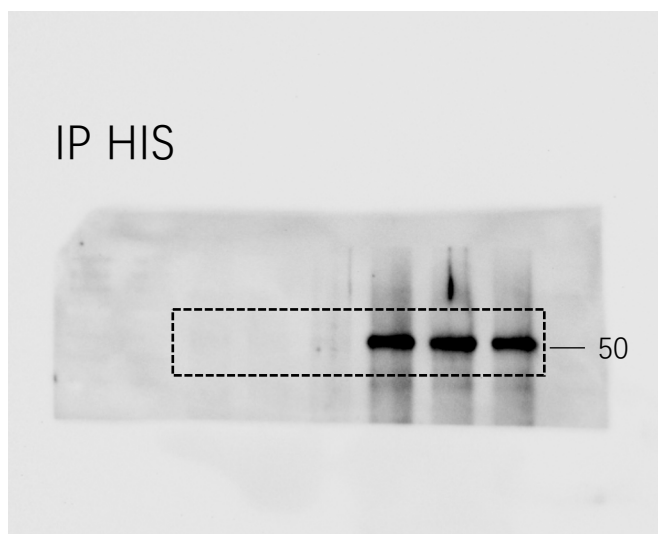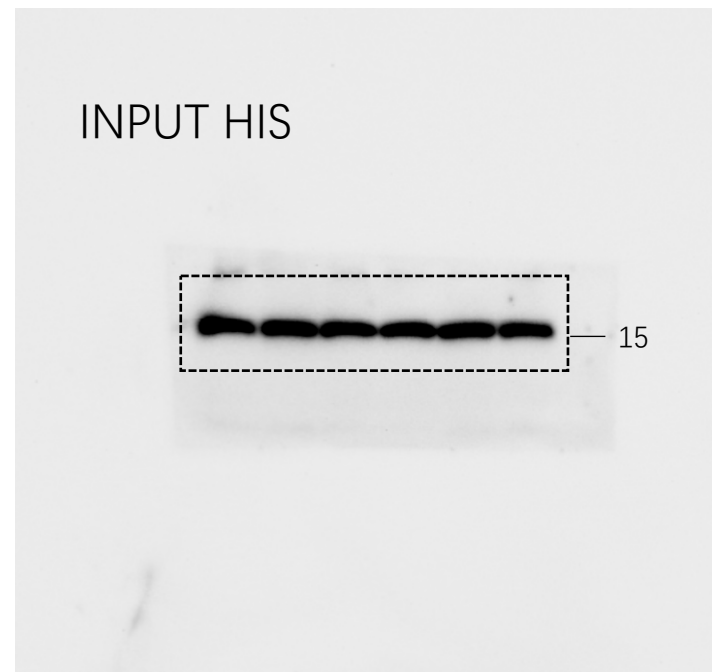

Fig 6C

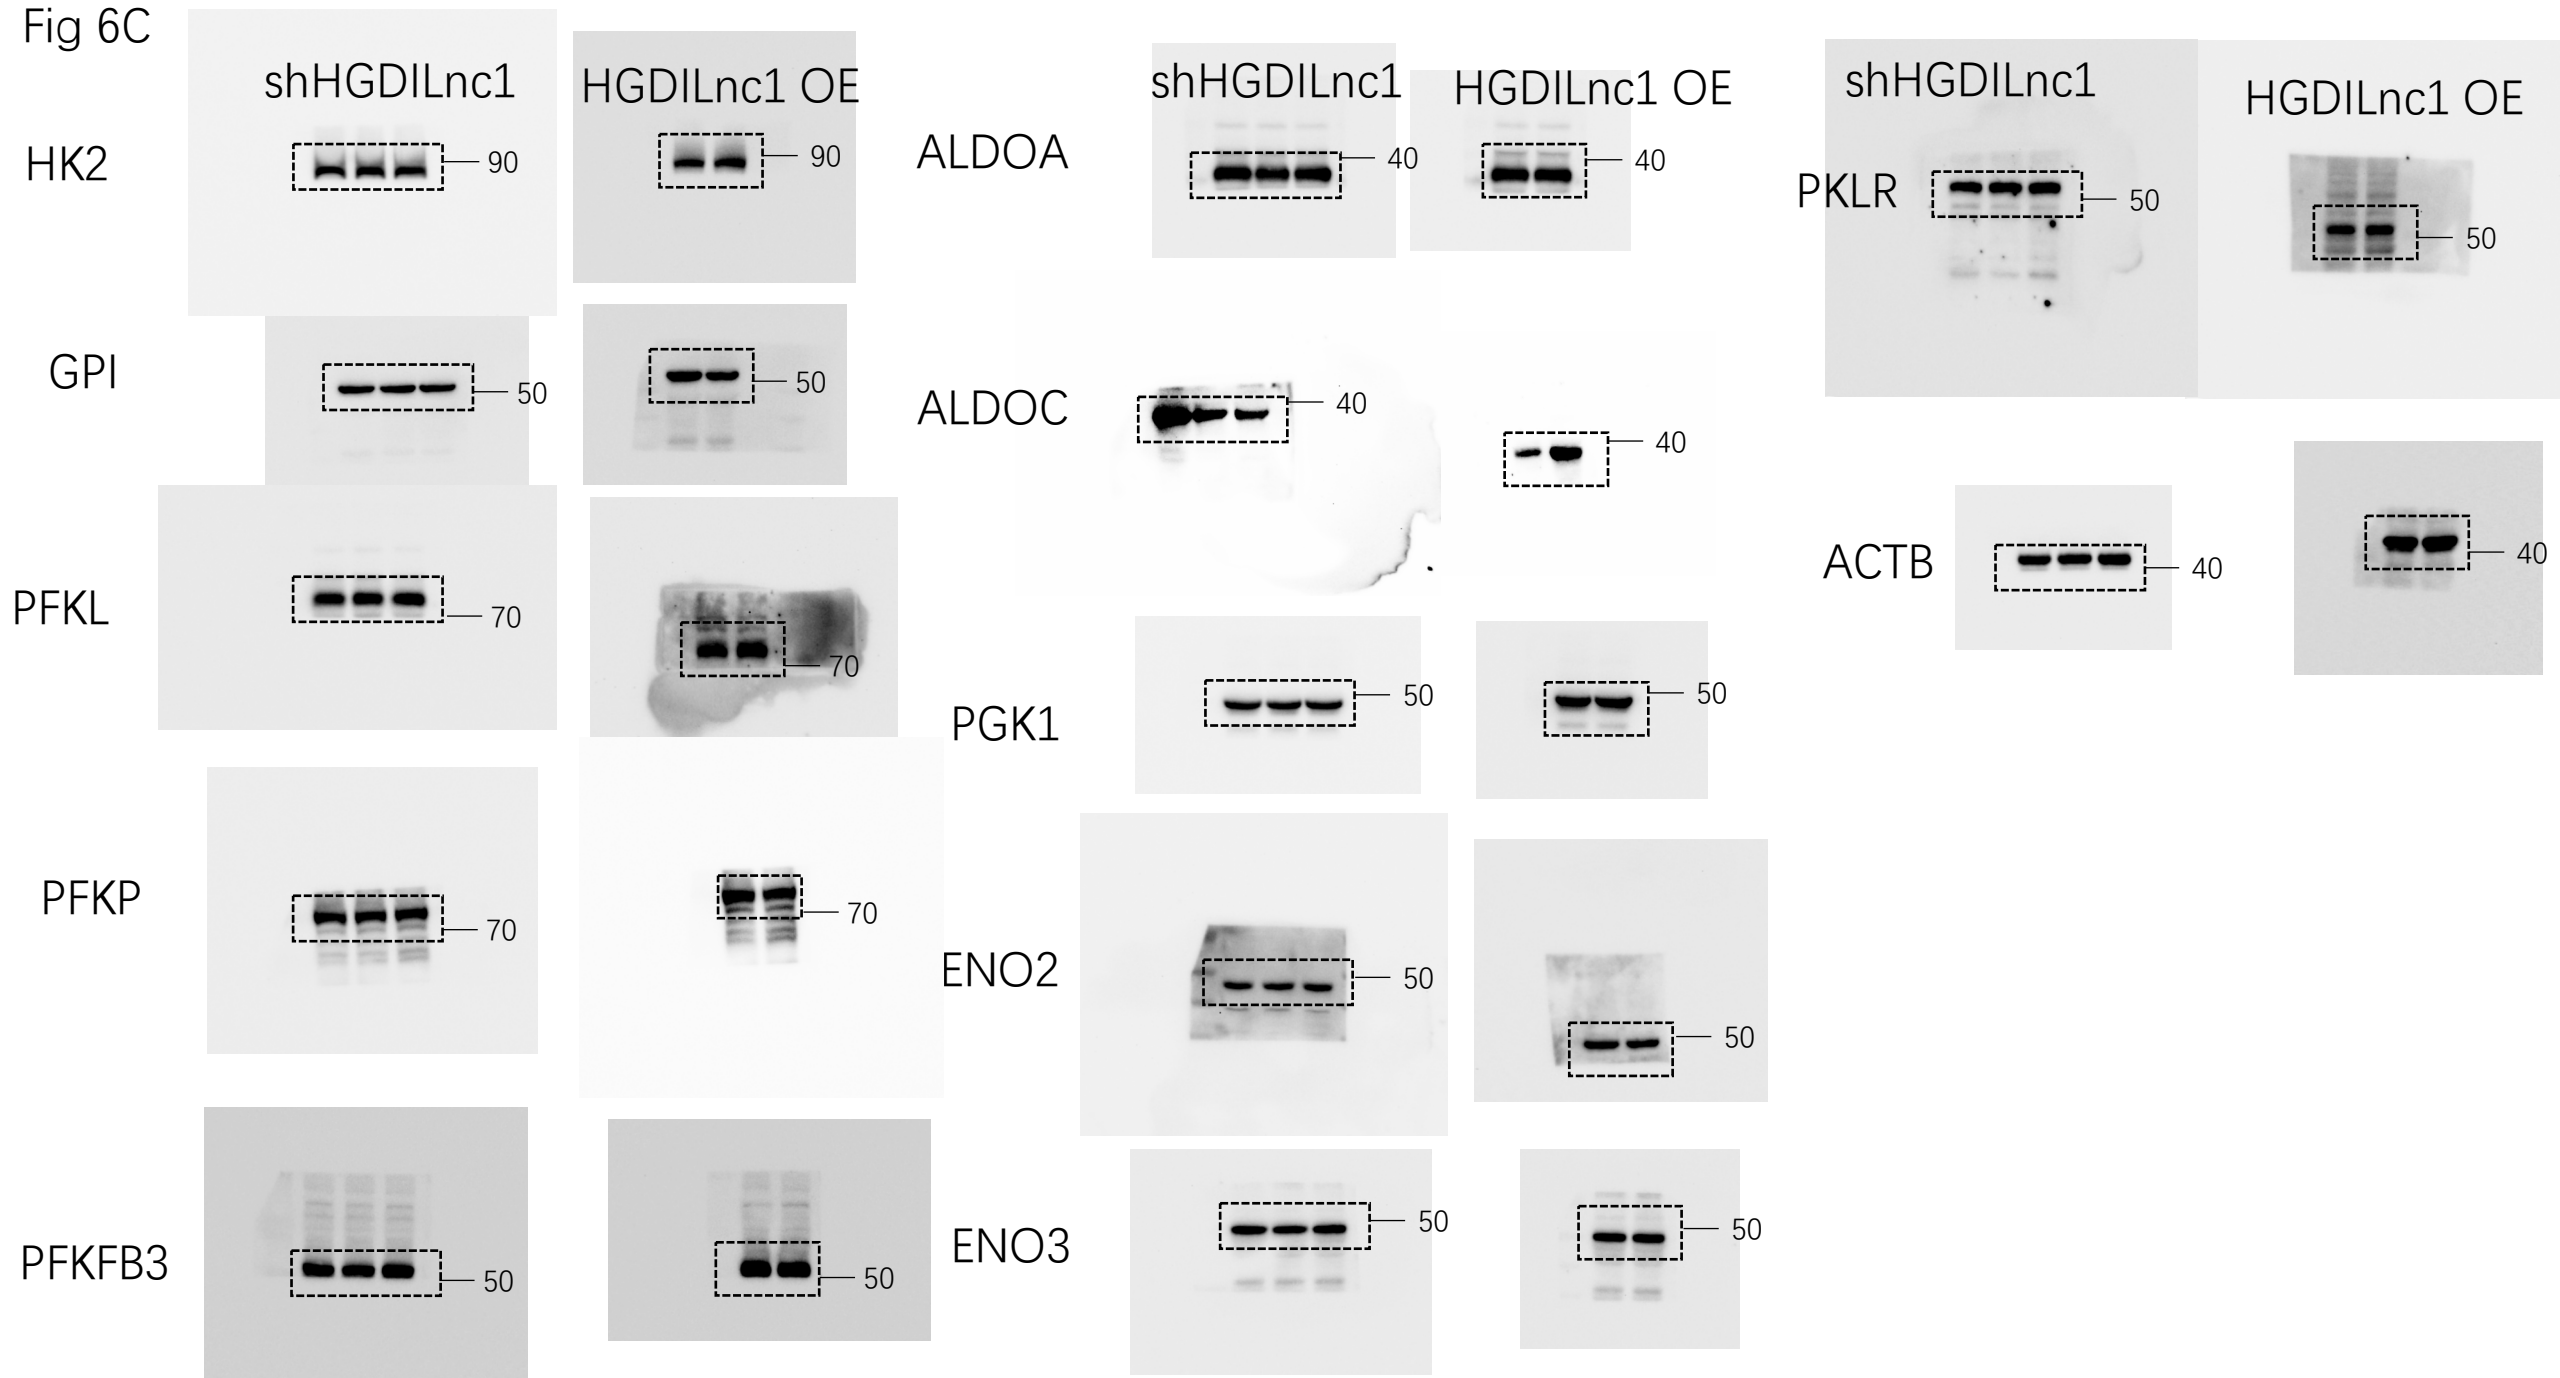

Fig 6D

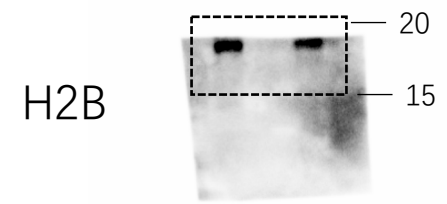

Fig 6G

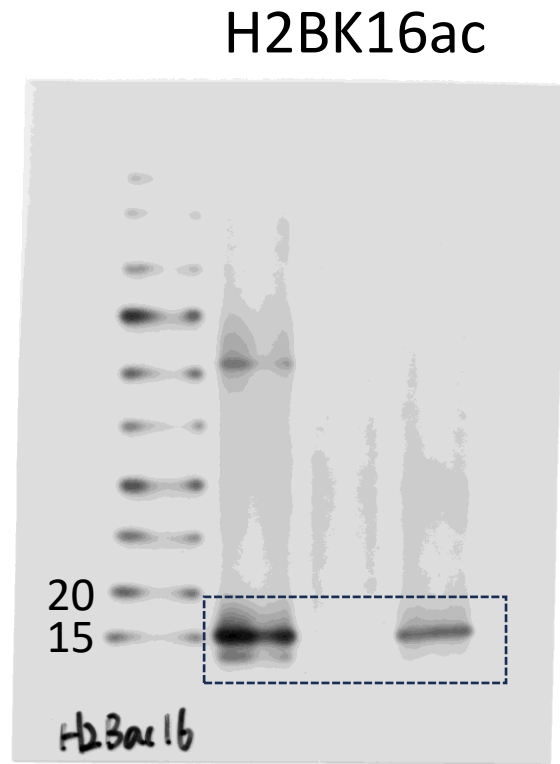

Fig S6J

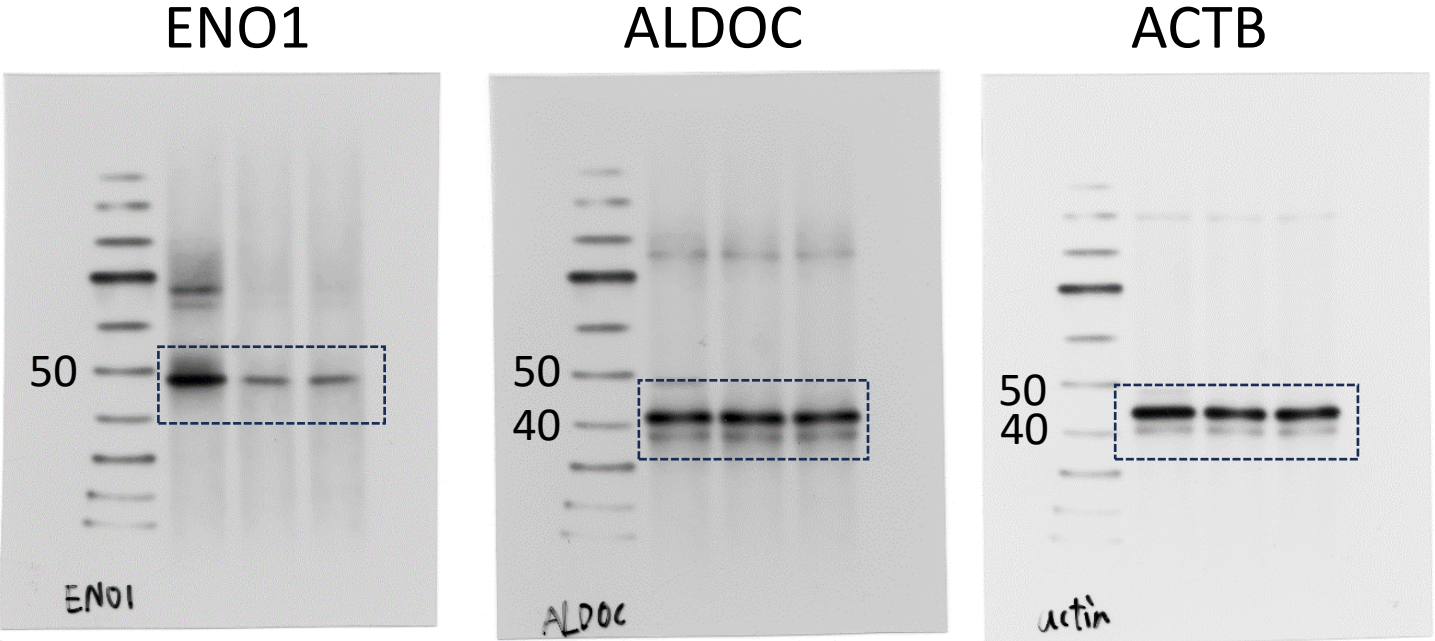

Fig S6K

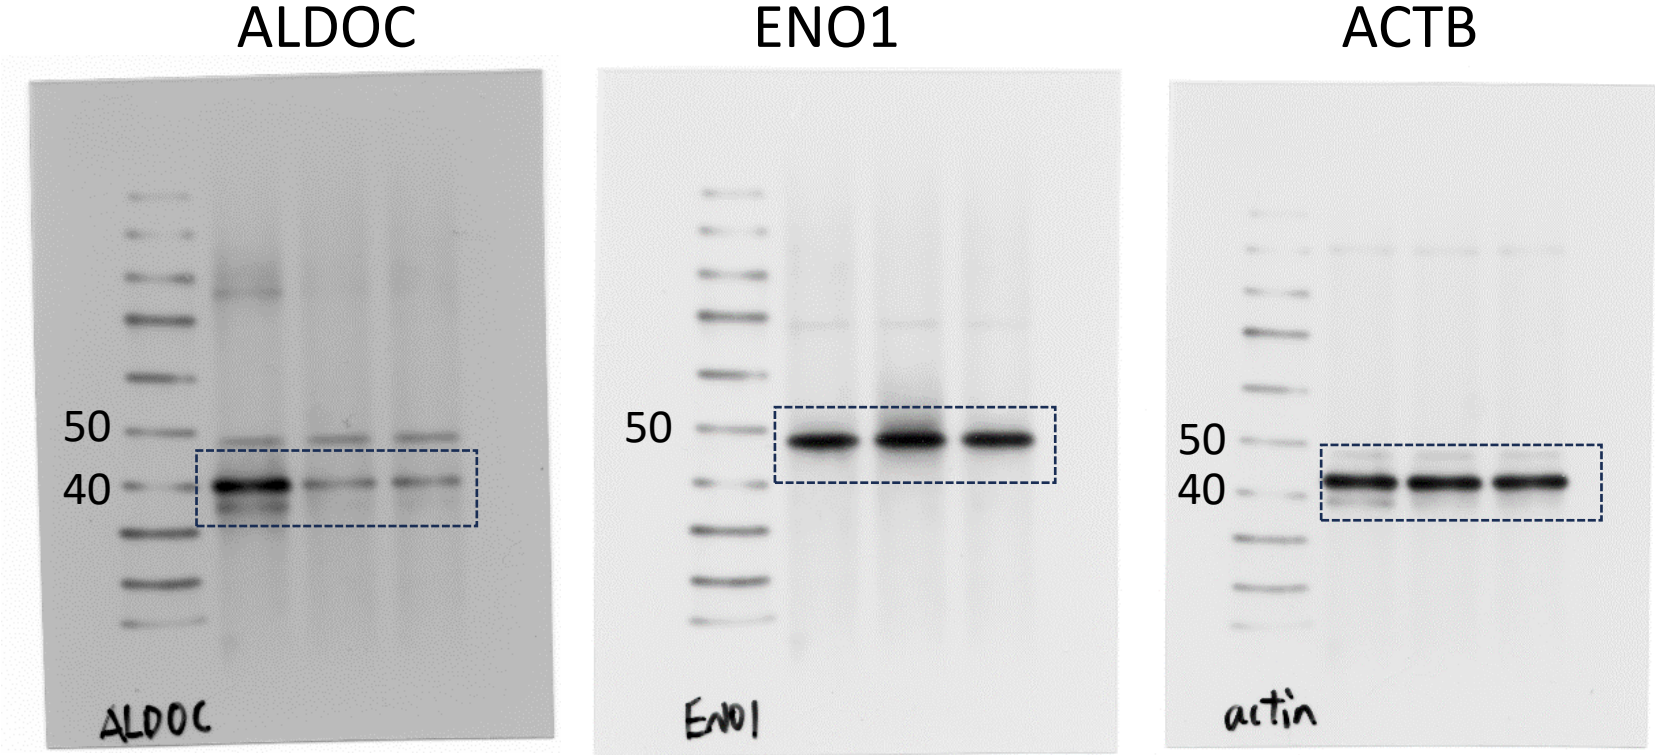

Supplement: 41420_2024_1903_MOESM2_ESM.pdf [file 41420_2024_1903_MOESM2_ESM.pdf]
