# Supplementary material for: Hypoxia and low-glucose environments co-induced HGDILnc1 promote glycolysis and angiogenesis
Source: PubMed Central journal article supplement (PMC10933424; doi:10.1038/s41420-024-01903-w), 2024-03-12
Supplement: 41420_2024_1903_MOESM1_ESM.pdf [file 41420_2024_1903_MOESM1_ESM.pdf]

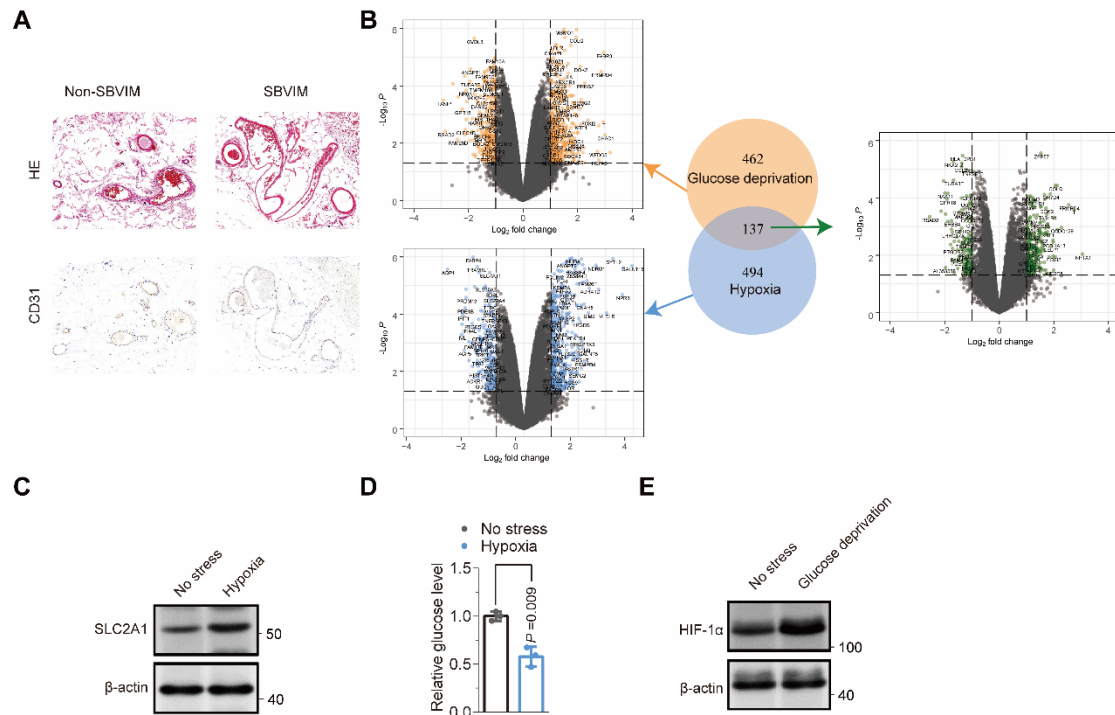

**Fig. S1** Hypoxia and low glucose environment co-induced SBVM. **A.** H&E staining of 10  $\mu$ m paraffin sections (up) and IHC (left) of CD31 in SBVM tissues and non-SBVM tissues. Scale Bars: 100  $\mu$ m. **B.** Schematic illustration and volcano plot for differentially expressed genes (Fold change  $> 2$ ,  $P < 0.05$ ) after hypoxic and glucose deprivation treatment. **C.** Western blot of SLC2A1 expression in HUVEC cells after hypoxic treatment. **D.** Relative Glucose level in culture medium of HUVEC after hypoxic treatment measured by colorimetric analysis in cohort 2. **E.** Western blot of HIF-1 $\alpha$  expression in HUVEC cells after glucose deprivation.

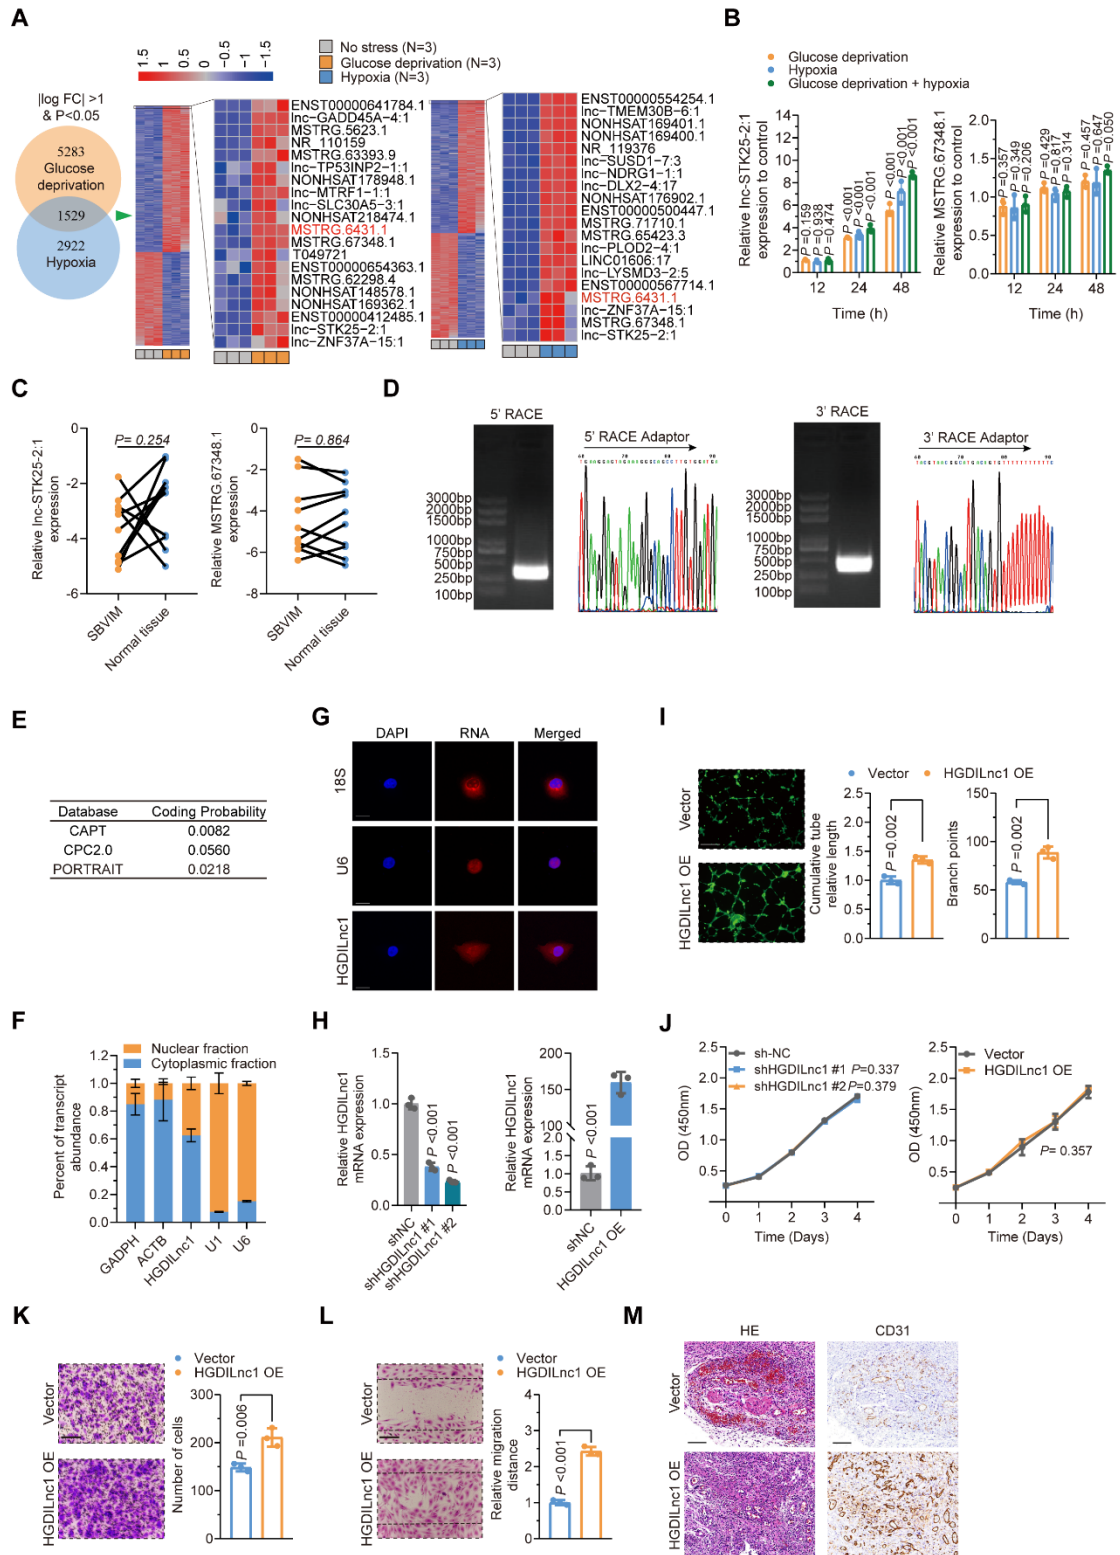

**Fig. S2** Glucose deprivation and hypoxia co-induced HGDI lnc1 stimulate angiogenesis both in vitro and in vivo. **A.** Left: Schematic diagram showing screening for differentially expressed lncRNAs after hypoxic and glucose-deprivation treatment. Middle: Heatmap of differentially expressed lncRNAs between glucose-deprived cells and controls. Right: Heatmap showing differentially expressed lncRNAs between hypoxic cells and controls. **B.** Candidate lncRNA

expression in HUVEC cell line measured by using qRT-PCR after glucose deprivation, hypoxia, or glucose deprivation with hypoxia treatment for 12, 24, 48 hours. **C.** Candidate lncRNA expression in SBVM and paired adjacent tissues measured by using qRT-PCR. **D.** Representative image of PCR products from the 5'-RACE with the sequences of the PCR products (left) and 3'-RACE with the sequences of the PCR products (right). **E.** The coding probability for the HGDILnc1 sequence was determined using CAPT, CPC2.0, and PORTRAIT databases. **F.** Expression of HGDILnc1 in cytoplasmic and nuclear fractions of HUVEC cells. U1, U6 RNA serves as a positive control for nuclear gene expression. GADPH and  $\beta$ -actin RNA serve as positive controls for cytoplasmic gene expression. **G.** Representative image of FISH for HGDILnc1 (red) in HUVEC cells. Nuclei are blue (DAPI). U6 RNA was a positive control for nuclear gene expression. 18S RNA was a positive control for cytoplasmic gene expression. Scale Bars: 20  $\mu$ m. **H.** HGDILnc1 expression levels in HUVEC cells determined by qRT-PCR after HGDILnc1 silencing (left) and HGILnc1 overexpression (right). **I.** Capillary tube formation for evaluation of angiogenesis in HUVECs after HGDILnc1 overexpression. Scale Bars: 100  $\mu$ m. **J.** CCK8 assays to determine the cell viability of HUVEC cells with HGDILnc1 silencing (left) or HGILnc1 overexpression (right). **K.** Transwell assays for evaluation of migration in HUVECs after HGDILnc1 overexpression. Scale Bars: 100  $\mu$ m. **L.** Wound-healing assay for evaluation of migration in HUVECs after HGDILnc1 overexpression. Scale Bars: 100  $\mu$ m. **M.** H&E staining (left) and CD31-labeling (right) of paraffin sections of the Matrigel plugs after HGDILnc1 overexpression in an *in vivo* model.

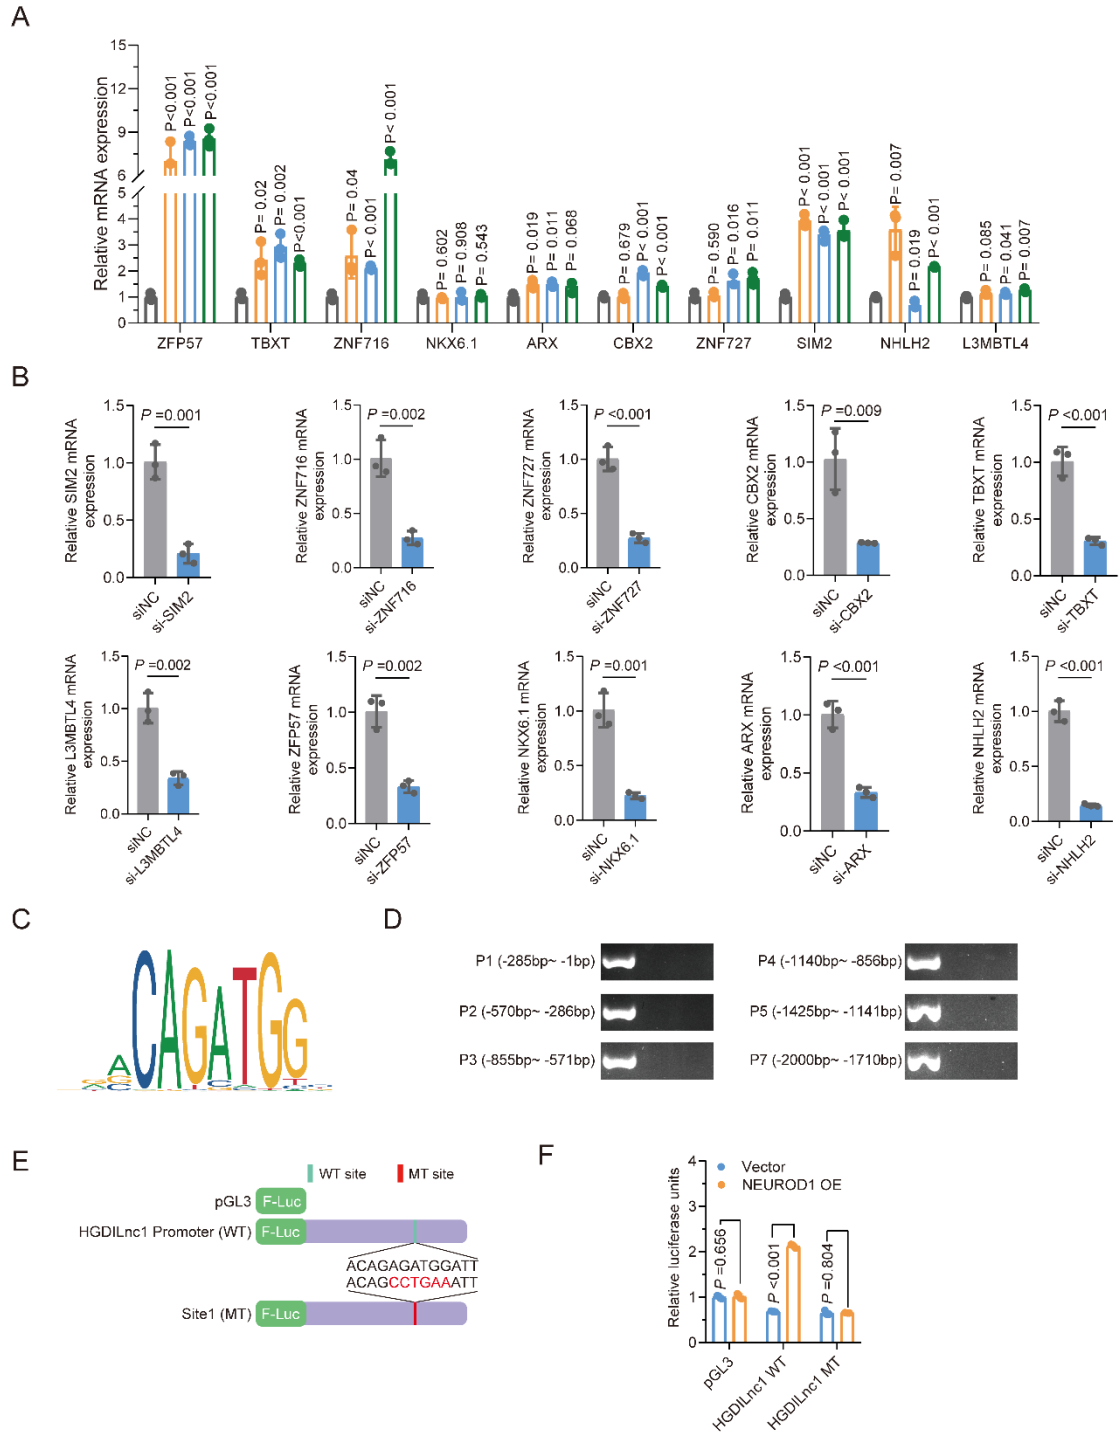

**Fig S3.** Glucose deprivation and hypoxia co-induced upregulation of HGDILnc1 by NeuroD1. **A.** mRNA expression of candidate transcription factors in HUVEC cells by qRT-PCR after glucose deprivation, hypoxia, or glucose deprivation with hypoxia treatment. **B.** Expression levels of candidate transcription factors in HUVEC cells by qRT-PCR after silencing of indicated transcription factors. **C.** PCR amplification of post-ChIP NeuroD1-binding fragments using anti-NeuroD1 antibody in HUVEC cell lysates. **D.** NeuroD1 motif for promoter binding. **E.** Diagram of HGDILnc1 wild-type (WT) and deletion mutants (MT) promoter-containing fragments showing putative NeuroD1-binding sites. **F.** Luciferase activity in NeuroD1-overexpressing HUVEC cells



after transfection with HGDILnc1 wild-type (WT) or deletion mutants (MT) promoter luciferase reporter vectors.

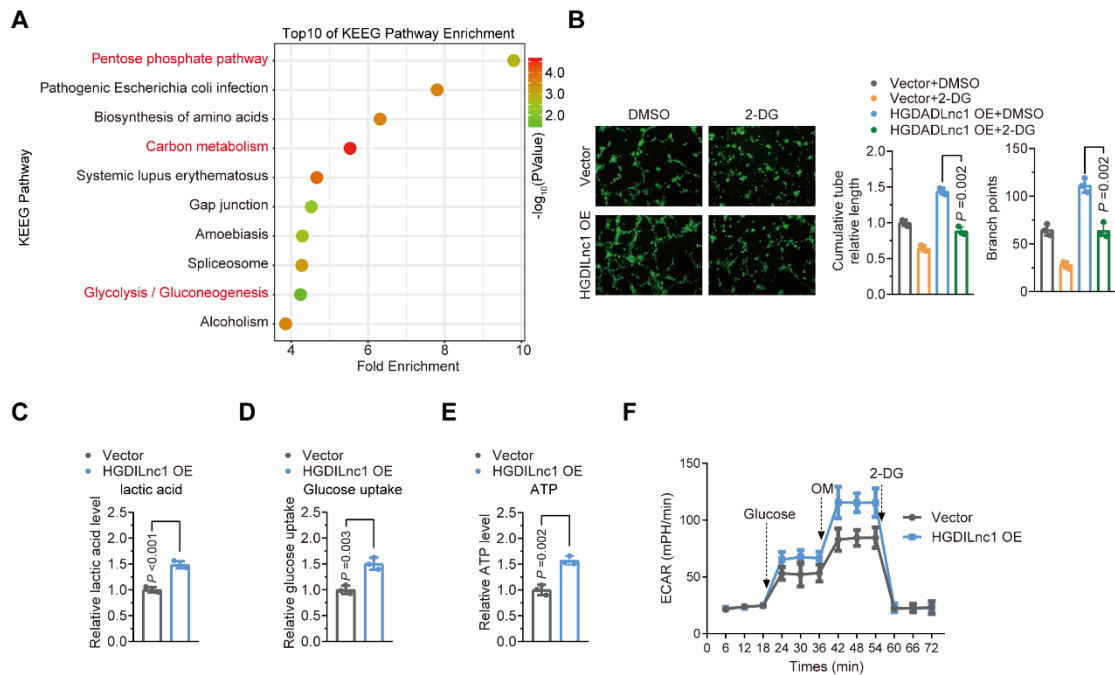

**Fig S4.** HGDILnc1 promotes glycolysis via ENO1. **A.** KEGG enrichment analysis (biological process) of HGDILnc1-associated cellular proteins using RNA pull-down. **B.** Capillary tube formation for evaluating angiogenesis in HGDILnc1-overexpressing after treatment with 5 mM 2-DG, 2-DG, and 2-deoxyglucose. **C-E** Lactate production (C), glucose uptake (D) and ATP production (E) were measured in HUVEC cells with HGDILnc1-overexpressing cells by colorimetric analysis. **F.** Extracellular acid ratio (ECAR) in HGDILnc1-overexpressing HUVEC cells.

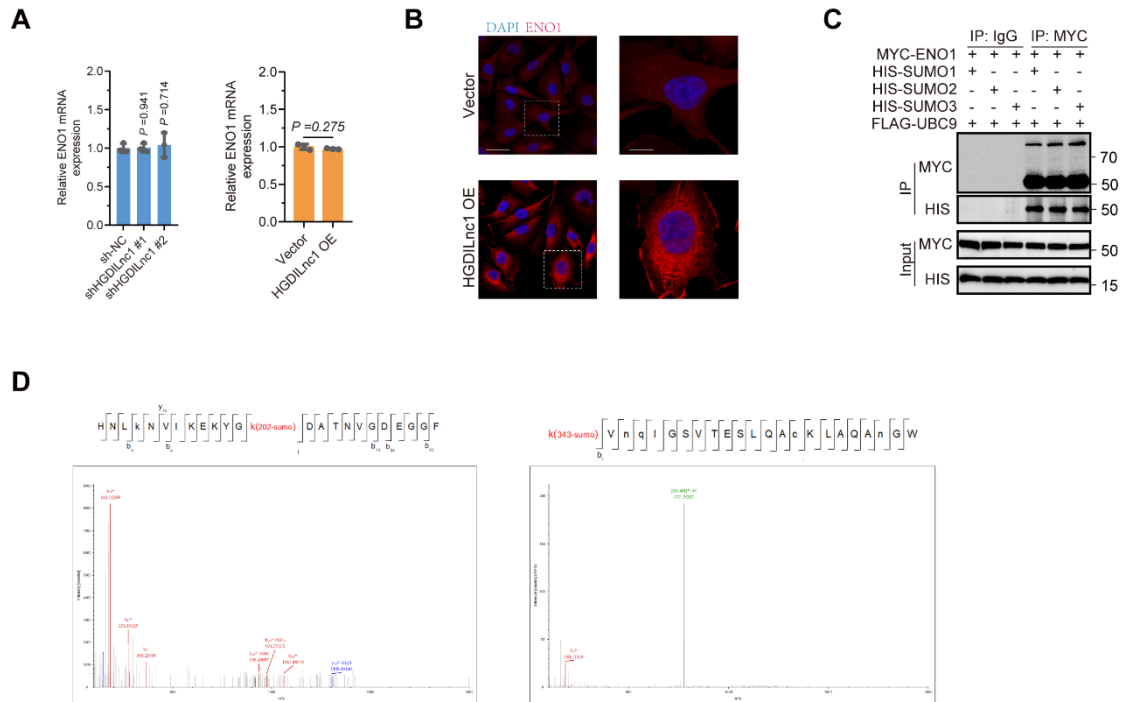

**Fig S5.** HGDILnc1 regulates the stability of ENO1 through suppression of ENO1 SUMOylation-triggered ubiquitination. **A.** mRNA expression levels of ENO1 in HUVEC cells measured by qRT-PCR after ENO1 silencing (left) and HGDILnc1 overexpression (right). **B.** Representative image of immunofluorescence staining of ENO1 expression in HGDILnc1-overexpressing HUVEC cells. Scale Bars, left: 20  $\mu$ m; right: 5  $\mu$ m. **C.** Coimmunoprecipitation (coIP) analysis for SUMOylation detection in HUVEC cells with co-transfection of MYC-ENO1 and FLAG-Ubc9 and HIS-SUMO1, HIS-SUMO2, or HIS-SUMO3 using the specified antibodies. **D.** Mass spectrometric identification of SUMOylation sites.

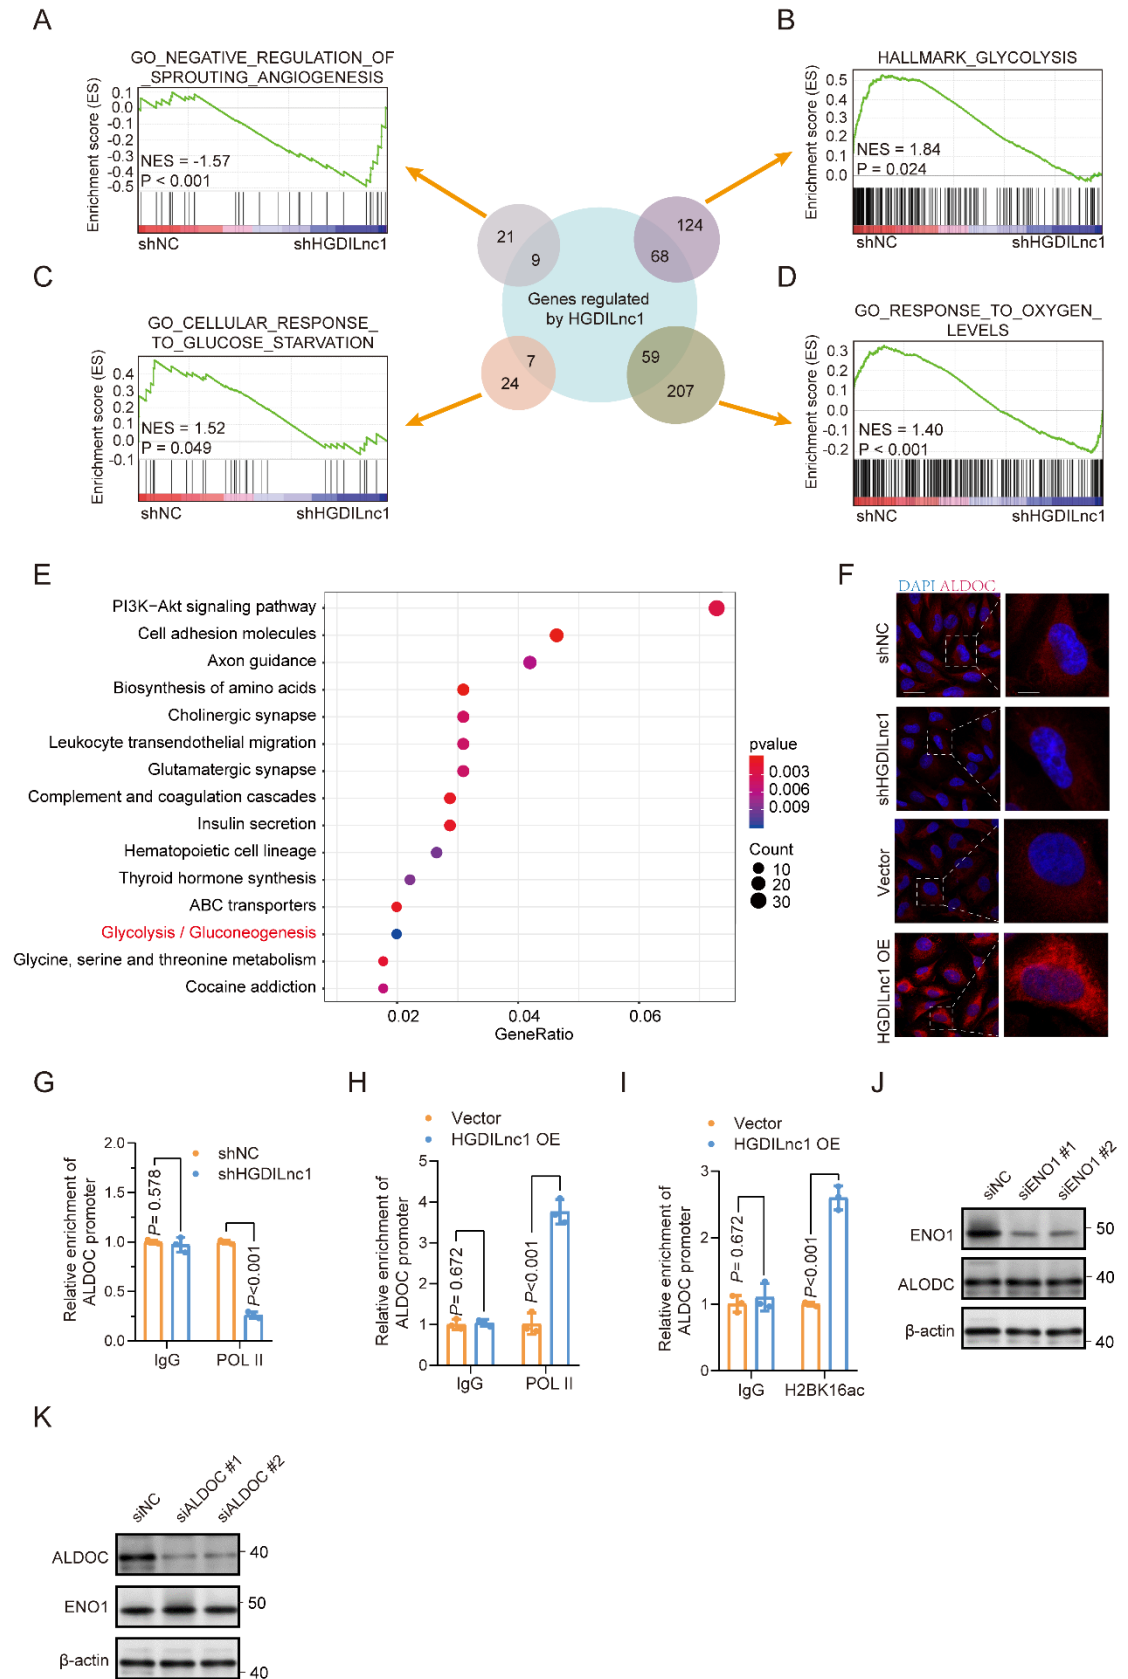

**Fig S6.** HGDILnc1 regulates the transcription of ALDOC through upregulation of H2BK16ac levels in the ALDOC promoter. **A-D.** Overview of GSEA used to identify the differential gene profiles in the ALDOC promoter. **E.** KEGG analysis of genes regulated by

HGDILnc1 using RNA-sequencing datasets of differentially expressed genes between HGDILnc1-silenced cells and controls. **F.** Representative image of immunofluorescence staining of ENO1 expression in HGDILnc1-silenced HUVEC cells (up) and HGDILnc1-overexpressing HUVEC cells (down). Scale Bars, left: 20  $\mu\text{m}$ ; right: 5  $\mu\text{m}$ . **G.** Binding of RNA POL II to the ALDOC promoter measured by ChIP-qPCR after HGDILnc1 silencing. An IgG antibody was used as a negative control. **H.** Binding of RNA POL II to the ALDOC promoter measured by ChIP-qPCR after HGDILnc1 overexpression. An IgG antibody was used as a negative control. **I.** Binding capacity of H2BK16ac to the ALDOC promoter measured by ChIP-qPCR after knocking down HGDILnc1. An IgG antibody was used as a negative control. **J.** Western blot of ALDOC expression in ENO1-silenced HUVEC cells. **K.** Western blot of ENO1 expression in ALDOC-silenced HUVEC cells.

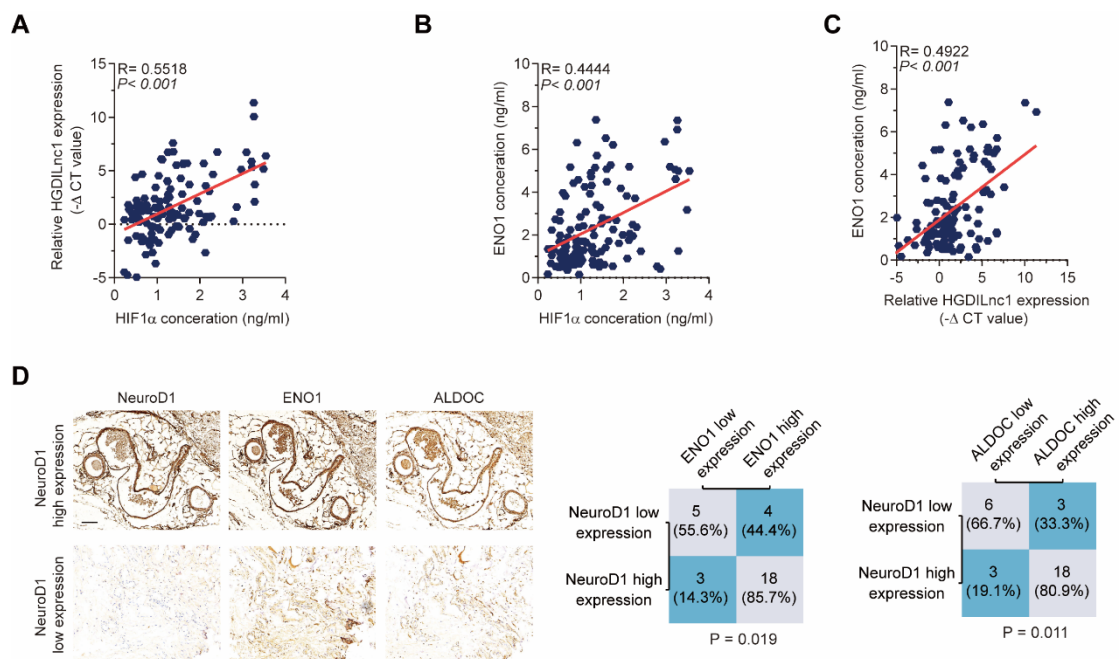

**Fig S7.** Clinical significance of the NeuroD1/HGDILnc1/ENO1/ALDOC axis in SBVM patients. **A** Correlation between HIF-1 $\alpha$  and HGDILnc1 expression in the sera of healthy individuals ( $n = 42$ ) and SBVM patients ( $n = 82$ ). **B.** Correlation between HIF-1 $\alpha$  and ENO1 expression in the sera of healthy individuals ( $n = 42$ ) and SBVM patients ( $n = 82$ ). **C.** Correlation between HGDILnc1 and ENO1 expression in the sera of healthy individuals ( $n = 42$ ) and SBVM patients ( $n = 82$ ). **D.** Representative immunohistochemical images of NeuroD1, ENO1, and ALDOC expression in SBVM with high and low NeuroD1 expression (left), and statistical analysis of SBVM tissues under different staining conditions (right). Scale Bars: 100  $\mu\text{m}$ .

## **Martials and Method**

### **Patients and Samples**

Cohort 1 consisted of serum samples from 82 SBVM patients before thalidomide treatment collected from 2003 to 2020 together with 42 normal sera. In addition, paired serum samples from 32 SBVM patients treated with or without thalidomide were also collected in the Cohort 1. The course of treatment was 4 months and the follow-up time was 12 months. The detailed clinical characteristics of patients in the Cohort 1 was shown in the Table S7.1. The cohort 2 consisted of 10 SBVM tissues and paired para-SBVM normal tissue from 10 different patients for measure of RNA and glucose level. The detailed clinical characteristics of patients in the Cohort 2 was shown in the Table S7.2. The cohort 3 consisted of 30 paraffin-embedded SBVM samples collected from patients in the Renji hospital who underwent surgery due to massive bleeding from 2000 to 2020 and 16 randomized selected non-SBVM samples. The detailed clinical characteristics of SBVM patients in the Cohort 3 was shown in the Table S7.3. The patients were presented informed agreement through the Biomedical Ethics Committee of Renji Hospital (2015-088k).

### **Cell cultivation**

HUVECs were purchased from FuHeng Cell Center (Shanghai, China). According to the introduction, HUVECs were cultivated in the Endothelial Cell Medium (ECM) (ScienCell, USA) medium. Both cell lines were grown in an incubator in a 5% CO<sub>2</sub> humidified environment at 37°C. For hypoxia treatment, cells were incubated in a hypoxia chamber under 1% O<sub>2</sub> after transfection for 24 hours or directly. Cells were cultivated in the glucose-free ECM (GF-ECM) (1001-GF, ScienCell, USA) for glucose deprivation treatment after transfection for 24 hours or directly.

### **Lentivirus and plasmids construction and transfection**

The control, control shRNA, HGDILnc1 shRNA adenovirus were created through Hanbio Biotechnology Co.Ltd (Shanghai, China). The control plasmid, HGDILnc1, ENO1, ALDOC, NeuroD1, HGDILnc1 F1/F2/F3, ENO1 overexpression plasmids, ENO1-K202R/K343R overexpressing plasmids were created through Shenggong Company (Shanghai, China). The siRNA of ENO1, ALDOC, NeuroD1 and the other 10 transcription factors were designed and constructed by Genepharma Technology (Shanghai, China). The transfection of the plasmids into the cells was exerted using the FuGENE transfection reagent (Life Technologies, USA), and the transfection of siRNAs into the HUVEC cell was executed by implementing the DharmaFECT 1 siRNA transfection reagent (Thermo Scientific Dharmacon Inc., USA).

### **CCK8 assessment**

By taking advantage of a plate containing 96 wells, two thousand cells were seeded into each well. According to the introduction of the Cell Counting Kit (Dojindo Molecular Technologies, Japan), cell viability was measured at the indicated time points (0h, 24h, 48h, 72h) after corresponding treatment. The optical density (OD) at 450 nm was evaluated by employing a VERSA Max microplate reader (MDS Analytical Technologies).

### **Matrigel Migration assessment**

The assay of Matrigel migration was executed by employing transwells containing 24 wells (6- $\mu$ m pore size; Millipore).  $1 \times 10^4$  pre-processed cells suspended in 200  $\mu$ L non-FBS cell cultivation milieu was increased to the upper chamber and 600  $\mu$ L cultivation milieu comprising 20% FBS was increased to the lower chamber and cultivated at 37°C. At the considered time, cells that had migrated onto the lower surfaces of the membrane were fixed by utilizing 4% paraformaldehyde for 15 min and stained by utilizing crystallization violet for 20 min. Following an additional rinsing by utilizing PBS, the

membranes were air-dried and cell number on the membrane was measured under light microscopy at  $\times 400$  magnifications. As the average of five randomly selected fields, the number of migrated cells was expressed.

### **Tube formation assessment**

HUVECs at density  $1 \times 10^4$  per well were seeded to matrigel-coated (BD Biosciences, San Jose, CA) plates containing 24 wells with circumstance milieus of HUVEC cells. Following the incubation for 12 hours at 37 °C, by utilizing Calcein AM (Abcam, Cambridgeshire, UK) cells were stained and the endothelial tubule creation was recorded by applying an inverted confocal microscope. Branch points and cumulative tube length were appraised by utilizing the Image J computer program.

### **Animals and in vivo angiogenesis assessment**

The procedures of animal experiments were confirmed through the Institutional Animal Care and Use Committee of Renji Hospital, School of Medicine, Shanghai Jiaotong University. Each 3 BALB/cAnN-nu (Nude) female mice (6 - 8 weeks of age) were chosen for each group without randomization and utilized for in vivo angiogenesis assessment. In vivo analysis of Matrigel was exerted as explained. After treatment, cells were subsequently trypsinized and around  $5 \times 10^5$  cells were blended with 50 ml ECM and 350 ml ice-cold Matrigel (BD Biosciences). Next, the mixture was employed under the back skin of 8 week-old BALB/cAnN-nu (Nude) female mice. 10-14 days later, for histological assessment, Matrigel plugs were harvested. The CD31+ capillary density was evaluated as already described. Binding was done for all animals in this study.

### **Lactate production assessment**

To evaluate the lactate productions, L-Lactate Assay kit (Colorimetric) was employed



(ab65331, Abcam, Cambridgeshire, UK) conforming to the protocols of the manufacturer. The transfected cells were planted into the plates of cell culture containing 96 wells and incubated at 37°C, during the night hours. Following the starvation for 2 hours, the supernatant was accumulated to evaluate the lactate productions. The levels of lactate productions were evaluated at 450 nm in a microplate reader.

### **Glucose uptake assessment**

Glucose Uptake Colorimetric Assay Kit (ab136955, Abcam, Cambridgeshire, UK) was implemented to ascertain glucose uptake conforming to the protocols of the manufacturer.  $1 \times 10^4$  pretreated cells were planted into the plates of cell culture containing 96 wells and incubated at 37°C, during the night hours. Following the incubation with 100  $\mu$ l Krebs-Ringer-Phosphate-HEPES for 40 minutes, the injection of 10  $\mu$ l 10mM 2-DG was done into each well and incubated for 20 minutes. And then cells were collected with the buffer of extraction and applied for determining the glucose uptake. The glucose uptake was evaluated through OD at 412 nm wavelength.

### **ATP production assessment**

ATP Assay Kit (ab83355, Abcam, Cambridgeshire, UK) was employed to evaluate cellular ATP contents conforming to the protocols of the manufacturer. In brief, 100  $\mu$ l of the cell lysate was blended with 100  $\mu$ l of ATP reaction mix and then incubated for 30 min. With the aid of OD, absorbance was evaluated at 570 nm wavelength.

### **Assessment of ECAR**

The Seahorse Extracellular Flux Analyzer XF96 (Seahorse Bioscience) was implemented to observe in vitro cells metabolic changes, conforming to the instructions

of the manufacturer. The seeding of the cells was fulfilled in a XF96-well plate at a density of  $2 \times 10^4$  per well following the corresponding treatment and permitted to bind during the night hour, succeeded by serum starvation for 1 day. To detect the real-time glycolytic rate (ECAR), an indicator of net proton loss during glycolysis, the incubation of the cell was carried out by employing unbuffered milieu succeeded by a sequential injection of 1  $\mu$ M oligomycin, 80mM 2-deoxyglucose, and 10mM glucose. ECAR assessments were normalized to the total content of protein and explained as mpH/min. Each specimen was ascertained in triplicate.

### **RNA assessment, extraction, and quantitative real-time PCR**

The extraction of total RNA was accomplished through TRIzol reagent (Invitrogen), and 1  $\mu$ g of total RNA was reverse transcribed by employing the PrimeScript RT Reagent Kit (Perfect Real-Time; Takara) and was evaluated by implementing a real-time quantitative PCR system. The amplified transcript level of each specific gene was normalized to ACTB. Subsequently, 0.5  $\mu$ g of the total RNA was reverse transcribed into cDNA for miRNAs with the aid of a specific miRNA stem loop primer. The level of the amplified transcript for each specific gene was normalized to U6. The primers were acquired from Shengong Company and showed in Table S7.

### **Western blots and antibodies**

The extractions of the proteins were resolved with 8%-15% SDS-PAGE, transferred to PVDF membranes, and then with primary antibodies were probed. Peroxidase-conjugated rabbit antibody or anti-mouse (Kangchen, China) was employed as secondary antibody and the antigen-antibody reaction was visualized through enhanced chemiluminescence assessment. The commercial antibodies utilized for WB were given in the Table S8.

### **Rapid amplification of cDNA ends (RACE)**

The products of RACE PCR were achieved employing a GeneRacer™ Kit (Invitrogen, USA) and on a 1.2% agarose gel were separated. The products of the gel were extracted employing a kit of gel extraction (Omega, Norcross, GA, USA), cloned into a pGM-T vector (Shenggong, Shanghai, China) and sequenced. The specific 5' RACE and 3' RACE primers are given in Table S7.

### **Immunofluorescence**

Cells growing on the coverslips were rinsed by utilizing PBS, fixed in 4% paraformaldehyde for 15 min and processed with 0.3% triton-x in PBS for 5 min. Cells were blocked with 3% BSA at ambient temperature for 1 h and then incubation was done by utilizing specific primary antibodies and correspondingly dyeconjugated secondary antibody. Ultimately, cells were counterstained with DAPI (Vector Laboratories, Burlingame, CA). With the aid of a laser-scanning confocal microscope (LSM-710, Zeiss, Germany) the images were obtained.

### **Fluorescent in situ hybridization (FISH)**

HUVECs were washed cursorily in 1X PBS and subsequently fixed in 4% paraformaldehyde at ambient temperature for 10 min. Cells were permeabilized in 1X PBS comprising 0.5% Triton X-100 at 4°C for 5 min, subsequently rinsed in 13PBS for 5 min. 200 mL of Pre-hybridization Buffer was increased at 37°C washed for 30 min. Hybridization was conducted with a FISH probe at 37°C in a moist chamber in the dark during the night hours employing Ribo™ Fluorescent In Situ Hybridization Kit (C10910, RiboBio, China). The slides were rinsed three times with Wash Buffer I (4X SSC with 0.1% Tween-20), once each with Wash Buffer II (2X SSC), Wash Buffer III (1X SSC) in the dark at 42°C for 5 min and once with 1X PBS at ambient temperature. Subsequently, the HUVECs were stained by utilizing DAPI for 10 min in the dark.

HGDILnc1-cy3 FISH probes (LNC1CM001, RiboBio, China) were designed and prepared through RiboBio Co., Ltd. Human U6 FISH probes (LNC110101, RiboBio, China) and human 18S FISH probes (LNC110102, RiboBio, China) were employed as the nuclear and cytoplasmic controls accordingly. The images were attained with laser-scanning confocal microscope (LSM-710, Zeiss, Germany).

### **RNA in situ hybridization (ISH)**

For ISH, the MSTRG.6431.1 probe was labeled with digoxin (339501, QIAGEN, Germany). The paraffin-embedded SBVM section was dewaxed and hydrated and subsequently rinsed with PBS. The section was incubated with 15 µg/ml protease K for 40 min at 37°C. Following the rinsing with PBS, the section was dehydrated through a gradient of 70%, 96%, and 100% ethanol. Then, 50-100 µl of the solution of hybridization was increased to each section. The section was covered on 22 × 22 glass and hybridized for 1 h at 50°C. Then, the section was washed with 5× SSC, 1× SSC, and 0.2× SSC at 50°C and washed with PBS at room temperature. After washing the section was placed into the sealing solution and sealed for 15 min (1 ml sealing solution: 10× Roche sealing solution 100 µl/1× maleic acid buffer 900 µl). The sealant was dried with paper and incubated with probe fragments during the night hours at 4°C. Following the incubation, the slide was rinsed with TBST. The reaction NBT/BCIP reaction was incubated for 1 h in a wet box in the dark (diluted NBT/BCIP buffer: 20 µl Roche reagent buffer/1 ml NBT/BCIP diluent). The slide was washed with TBST, and 200 µl of red nuclear fixation dye was added for 1 min. Then, the slide was placed under running water for 10 min and dehydrated with alcohol. The slide was sealed with glycerin buffer. Imaging of vessels was observed after scanning of the sections using Digital Pathology Slide Scanner (KF-PRO-120, KFBIO, China). The staining intensity score was defined as low expression (negative or weak) or high expression (moderate or strong).

## **Immunohistochemistry**

Paraffin-embedded SBVM tissue sections from the Renji hospital were used to perform an immunohistochemistry assay. Briefly, the sections were deparaffinized and rehydrated, and, after retrieval of antigen and blocking, incubated with the primary antibody. The primary antibodies employed in the present research was listed in the Supplementary Table 2. The section was incubated with peroxidase-labeled secondary antibody and stained by DAB reagent. Imaging of vessels was observed after scanning of the sections using Digital Pathology Slide Scanner (KF-PRO-120, KFBIO, China). The staining intensity score was defined as low expression (negative or weak) or high expression (moderate or strong).

## **Enzyme linked immunosorbent assay (ELISA)**

Enzyme linked immunosorbent assay (ELISA) was accomplished as described in the HIF1 $\alpha$  ELISA Kit (CSB-E12112h, CUSABIO, China) and ENO1 ELISA Kit (CSB-E17177h, CUSABIO, China). First, we added 100  $\mu$ l of benchmark solution or sample to each well and incubate for 2 hours at 37°C. Subsequently, 100  $\mu$ l of Biotin-antibody was added to each well and the plate was incubated for 60 min at 37°C. After that, we aspirated and washed the plate and added 100  $\mu$ l of HRP-avidin to each well for 60 min at 37°C. Finally, we read the optical density (OD) at 450 nm after the addition of 90  $\mu$ l of TMB substrate for 15-30 minutes and 50  $\mu$ l of stop solution. The concentrations were evaluated based on a linear standard curve made by the concentration of standards and the mean value of OD.

## **Co-immunoprecipitation (co-IP)**

The incubation of four micrograms normal rabbit IgG (A7016, Beyotime, China) or IP antibody, 40  $\mu$ l suspended IP Matrix (sc45039, Santa Cruz, USA) and 500  $\mu$ l PBS was executed for at least an hour on a rotator at 4 °C. Next, the solution was centrifuged and

rinsed three times by utilizing PBS in the presence of a mixture of protease inhibitor (phosphatase inhibitor, Protease inhibitors, PMSF; KangChen, Shanghai, China) and subsequently discard supernatant attentively. The transfected cells were lysed for 48h and then transferred to the matrix, and also incubated on a rotator at 4 °C during the night hours. Furthermore, the matrix was centrifuged and rinsed five times. SDS-PAGE sample loading buffer (P0015, Beyotime, China) was added to the immunoprecipitates succeeded by boiling at 100 °C for 10 min. The input proteins and IP were identified through western blot.

### **Chromatin immunoprecipitation (ChIP)**

Magna HiSens Chromatin immunoprecipitation (ChIP) kit (17-10461, Millipore, New Bedford, MA) was employed conforming to the instructions of the manufacturer. HUVEC cells cultivated in a 10-cm dish were fixed with 16% formaldehyde to crosslink proteins to DNA. The extraction of chromatin was acquired from the cells by implementing corresponding antibodies and crosslinked DNA was sheared into 250–500 bp fragments. IgG and was employed as negative. PCR primers (Supplementary Table 1) were implemented to identify putative binding fragments.

### **RNA immunoprecipitation (RIP)**

RNA Immunoprecipitation (RIP) assessments were executed by employing the Magna RIP Kit (17-700, Millipore, New Bedford, MA) conforming to the protocols of the manufacturer. Cells were provided utilizing RIP lysis buffer and the RNA-protein complexes were immunoprecipitated employing corresponding antibodies, and normal rabbit IgG. The purification of co-precipitated RNAs was exerted by implementing phenol:chloroform:isoamyl alcohol and exposed to reverse transcription-PCR or real-time PCR assessment. A control amplification was conducted on the input RNA prior to immunoprecipitation.

### **RNA Pull-down**

Biotinylated lncRNAs were refolded in NEB enzyme buffer with RNase-out (Invitrogen, USA) at a final concentration of 200 ng/ $\mu$ L. The incubation of diluted RNAs was carried out for 10 min at 60 °C and gradually cooled to 4 °C. Aliquots of 2  $\mu$ g of folded RNAs were employed for pull-down assessments. For preparation of cell lysates, HUVEC cells were harvested into 5 mL of buffer A [10 mM Tris·HCl, pH 7.0, 1.5 mM MgCl<sub>2</sub>, 10 mM KCl, 0.5 mM DTT, 1 mM PMSF, and protease inhibitor mixture (Roche Molecular Biochemicals, Mannheim, Germany)]. Cells were lysed through adding 0.25% Nonidet P-40 and incubating at 4 °C for 10 min. The lysates were centrifuged at 2,500  $\times$  g for 15 min, and the supernatant was eliminated. Pellets comprising the nuclear fractions were re-suspended in 3 mL of buffer C (25 mM Tris·HCl, pH 7.0, 0.5% Nonidet P-40, 150 mM KCl, 0.5 mM DTT, and protease inhibitor mixture) and mechanically sheared through homogenizing for 15–20 strokes. The specimens were cleared through centrifuging at 15,000  $\times$  g for 10 min. For the pull-down incubations, nuclear lysates containing 1 mg of protein were pre-cleared by utilizing streptavidin beads and subsequently incubated with 2  $\mu$ g of biotinylated RNA and 40  $\mu$ l of streptavidin beads at 4 °C for 2 hours. Beads were accumulated through centrifugation and rinsed with buffer C three times. The elution of RNA-associated proteins was fulfilled and then resolved through SDS/PAGE succeeded by silver staining (Bio-Rad, USA).

### **Luciferase assessment**

To discover the effect of NEUROD1 on the HGDILnc1 promoter transcriptional performance, pGL3-HGDILnc1 promoter wild-type (WT) plasmid with related mutant-type (MT) plasmid was designed and fabricated (GENEray Company, Shanghai, China). The reporter plasmids and the NEUROD1 siRNA or vector were transferred simultaneously into cells. Luciferase activity was evaluated by implementing a



FLUOstar device (11402ES60, YEASEN, Shanghai, China), with the Dual-Luciferase reporter assay system (Promega). The efficiency of transfection was normalized through separating the luciferase activity of the construct by the analogous Renilla luciferase activity.

### **Liquid Chromatography-Mass Spectrometry (LC-MS) Analysis, Database Search, and Protein Identification**

To detect specific GClnc1, HGDILnc1 interactors, and Antisense HGDILnc1 pulled-down eluates were scrutinized, and the bands that were principally demonstrated only in the HGDILnc1 pulled-down specimen were selected. The bands were excised to conduct in-gel trypsin digestion and peptide extraction. For the identification of SUMOylation site of ENO1, and the bands that were mainly located in range of ENO1 protein size were chosen. The bands were excised to perform in-gel chymotrypsin digestion and the extraction of peptides. In brief, coomassie brilliant blue (CBB) dye on gel slices were eliminated by utilizing 50% acetonitrile (ACN)/50mM ammonium bicarbonate and dehydrated in 100% ACN. The gel slices then were reconstituted in an in-gel digestion buffer comprising sequencing-grade trypsin (V5113, Promega, USA) or sequencing-grade chymotrypsin (V1061, Promega, USA) overnight at 37 °C for protein digestion. The extraction of tryptic peptides was done from the gel pieces with 50 % ACN/0.1 % trifluoroacetic acid (TFA) and lyophilized.

The peptide specimens were scrutinized on Thermo Fisher LTQ Orbitrap ETD mass spectrometry, in brief, loaded specimen onto the system of HPLC chromatography named Thermo Fisher Easy-nLC 1000 supplemented with a C18 column (1.8mm, 0.15×1,00mm). Solvent A and B included 0.1% formic acid and 100% acetonitrile, respectively. The elution gradient was from 4% to 18% in 182 min, 18% to 90% in 13

min solvent B at a flow rate of 300nL/min. The analysis of mass spectrometry was conducted at the AIMSMASS Co., Ltd. (Shanghai, China) in the positive-ion mode with an automated data-dependent MS/MS assessment with complete scans (350-1600 m/z) procured employing FTMS at a mass resolution of 30,000 and the ten most intense precursor ions were chosen for MS/MS. The MS/MS was obtained by applying higher-energy collision dissociation at 35% collision energy at a mass resolution of 15,000.

Raw MS files were scrutinized through MaxQuant (version 1.5.2.8), the criterion employed for the analysis of data including trypsin as the protease with a maximum of two missed cleavages permitted. The mass tolerance for fragment ions and precursor ions was set to 4.5ppm and 20 ppm, accordingly. The search contained the modification of variables related to deamidation and methionine oxidation, and fixed modification of carbamidomethyl cysteine. Minimal length of the peptide was set to six amino acids and a maximum of two miscleavages was permitted. The false discovery rate (FDR) was set to 0.01 for identifications of protein and peptide.

### **RNA high-throughput sequencing and bioinformatics assessment**

The isolation of total RNA was accomplished and purified by employing TRIzol reagent (Invitrogen, Carlsbad, CA, USA) according to the procedure of the manufacturer after silencing of HGDILnc1 or not. The amount of RNA and purity of each specimen was appraised by applying NanoDrop ND-1000 (NanoDrop, Wilmington, DE, USA). The integrity of RNA was evaluated through Bioanalyzer 2100 (Agilent, CA, USA) with RIN number >7.0, and approved by electrophoresis with denaturing agarose gel. Poly (A) RNA is purified from 1µg total RNA employing Dynabeads Oligo (dT) 25-61005 (Thermo Fisher, CA, USA) implementing two rounds of purification. Subsequently, the poly(A) RNA was fragmented into smaller pieces employing Magnesium RNA Fragmentation Module (e6150, NEB, USA) under 94°C 5-7min. Next, the cleaved RNA fragments were reverse-transcribed to form the cDNA

via SuperScript™ II Reverse Transcriptase (1896649, Invitrogen, USA), which were then applied to synthesise U-labeled second-stranded DNAs with E. coli DNA polymerase I (m0209, NEB, USA), RNase H (m0297, NEB, USA) and dUTP Solution (R0133, Thermo Fisher, USA) . An A-base is next increased to the blunt ends of each strand, preparing them for ligation to the indexed adapters. Each adapter includes a T-base overhang for ligating the adapter to the A-tailed fragmented DNA. Single- or dual-index adapters are ligated to the fragments, and size selection was carried out with AMPureXP beads. Following the heat-labile UDG enzyme (m0280, NEB, USA) processing of the U-labeled second-stranded DNAs, the ligated productions are amplified through PCR according to the following circumstances: primary denaturation for 3 min at 95°C; 8 cycles of denaturation for 15 sec at 98°C, annealing for 15 sec at 60°C, and extension for 30 sec at 72°C; and then final extension for 5 min at 72°C. The mean insert size for the final cDNA library was 300±50 bp. Ultimately, we conducted the 2×150bp paired-end sequencing (PE150) on an illumina Novaseq™ 6000 (LC-Bio Technology CO., Ltd., Hangzhou, China) conforming to the vendor's suggested protocols.

Fastp computer program (<https://github.com/OpenGene/fastp>) was implemented to eliminate the reads that included adaptor pollution, lower quality bases and unspecified bases with default parameters. Subsequently, the quality of the sequence was also confirmed by implementing fastp. We employed HISAT2 (<https://ccb.jhu.edu/software/hisat2>) to map reads to the reference genome of Homo sapiens GRCh38. The mapped reads of each specimen were collected by utilizing StringTie (<https://ccb.jhu.edu/software/stringtie>) with default parameters. Subsequently, all transcriptomes from all specimens were appeared to reconstruct a thorough transcriptome by applying gffcompare (<https://github.com/gpertea/gffcompare/>). Following the generation of the last transcriptome, StringTie was utilized to evaluate the levels of expression for all transcripts. StringTie was employed to execute the level

of expression for mRNAs through the calculation of FPKM ( $FPKM = \frac{total\_exon\_fragments}{mapped\_reads(millions)} \times exon\_length(kB)$ ). The differentially expressed mRNAs were chosen with fold change  $> 2$  or fold change  $< 0.5$  and with parametric F-test in comparison with the nested linear models (p value  $< 0.05$ ) by R package edgeR (<https://bioconductor.org/packages/release/bioc/html/edgeR.html>). The data of the RNA sequence has been deposited in NCBI's Gene Expression Omnibus (GEO) and are accessible through GEO Series accession number GSE186473.

### **Microarray Information and analysis**

The Agilent Human lncRNA Microarray 2019 (4\*180k, Design ID:086188) was employed in the current assessment. After extraction and quantification of total RNA and assessment of RNA integrity, the labeling of the sample, hybridization of microarray and rinsing were conducted conforming to the standard protocols of the manufacturer. In brief, total RNAs were transcribed to double-strand cDNA, subsequently, synthesized into cRNA and labeled with Cyanine-3-CTP. The labeled cRNAs were hybridized onto the microarray. Following the rinsing, the arrays were scanned via the Agilent Scanner G2505C (Agilent Technologies). Feature Extraction computer program (version 10.7.1.1, Agilent Technologies) was applied to scrutinize the images of the array to obtain raw data. To begin with, the raw data was normalized by utilizing the quantile algorithm. Differentially expressed genes were next characterized via fold change and also P value assessed with t-test. The threshold set for up- and down-regulated genes was a fold change  $\geq 2.0$  and a P value  $\leq 0.05$ . The data of the Agilent Human lncRNA Microarray has been deposited in NCBI's Gene Expression Omnibus (GEO) and are accessible through GEO Series accession number GSE186474.

### **Statistical investigations**

The statistical assessments were conducted employing GraphPad. The data was assessed whether they were normally distributed with the One-Sample Kolmogorov–Smirnov assessment. If the data were normally distributed and the variation between groups were comparable, the comparisons of assessments data between the two groups were executed implementing Student' t-test. The comparisons among three or more groups were initially exerted through one-way analysis of variance (ANOVA) assessments if the variation between groups were comparable. If the outcomes demonstrated considerable discrepancy, the analysis of Student Newman Keuls was employed to examine the differences between the two groups. For the clinicopathologic assessment, the Chi-square assay or Fisher exact assay (two-sided) were accomplished. All p-values were two-sided unless otherwise determined.

Table S1 significant different expression of mRNA after hypoxia treatment compared to controls.

| Gene     | logFC    | AveExpr  | t        | P.Value  | adj.P.Val | B        |
|----------|----------|----------|----------|----------|-----------|----------|
| HSD17B2  | 3.464033 | 10.47816 | 45.0223  | 1.66E-08 | 0.00034   | 8.760261 |
| SPAG4    | 2.8387   | 9.593727 | 36.68043 | 5.33E-08 | 0.000393  | 8.256367 |
| ANKRD37  | 3.277741 | 10.85477 | 32.62908 | 1.04E-07 | 0.000393  | 7.908915 |
| CLDN3    | 3.622782 | 8.261054 | 32.15692 | 1.13E-07 | 0.000393  | 7.862513 |
| NOG      | 2.46529  | 9.664616 | 32.01477 | 1.16E-07 | 0.000393  | 7.848271 |
| NPTX1    | 4.626304 | 6.274846 | 29.86931 | 1.71E-07 | 0.000393  | 7.616901 |
| VEGFA    | 2.722522 | 10.04916 | 29.51361 | 1.83E-07 | 0.000393  | 7.575348 |
| AK4      | 2.681546 | 9.1898   | 29.48576 | 1.84E-07 | 0.000393  | 7.572054 |
| P4HA1    | 2.213634 | 10.5156  | 29.32748 | 1.90E-07 | 0.000393  | 7.553215 |
| TMEM158  | 3.635404 | 13.64587 | 29.27889 | 1.92E-07 | 0.000393  | 7.547392 |
| EGLN3    | 4.965124 | 6.007153 | 27.61173 | 2.68E-07 | 0.000498  | 7.335804 |
| LOX      | 2.544888 | 13.26273 | 27.19233 | 2.92E-07 | 0.000498  | 7.278743 |
| ADAMTS15 | 1.74113  | 6.683101 | 23.84078 | 6.15E-07 | 0.000854  | 6.75799  |
| NMU      | 3.332934 | 5.269127 | 23.58848 | 6.53E-07 | 0.000854  | 6.713552 |
| MEGF6    | 1.750103 | 11.08927 | 23.46284 | 6.73E-07 | 0.000854  | 6.691119 |
| ADORA2A  | 2.309964 | 8.325483 | 23.27597 | 7.05E-07 | 0.000854  | 6.657371 |
| RAB17    | 2.949843 | 7.30821  | 23.24926 | 7.09E-07 | 0.000854  | 6.65251  |
| ADM      | 2.008385 | 14.0741  | 22.69479 | 8.13E-07 | 0.000888  | 6.549416 |
| HMOX1    | -2.14513 | 13.84458 | -22.6361 | 8.25E-07 | 0.000888  | 6.53825  |
| FABP4    | -1.8698  | 9.274952 | -21.7779 | 1.03E-06 | 0.001018  | 6.369389 |
| INHBA    | 1.763252 | 10.00427 | 21.49926 | 1.10E-06 | 0.001018  | 6.312199 |
| APLN     | 1.681869 | 12.62331 | 21.27706 | 1.17E-06 | 0.001018  | 6.265716 |
| SYTL2    | 3.268728 | 4.736417 | 21.26499 | 1.17E-06 | 0.001018  | 6.263169 |
| ADSSL1   | 2.109805 | 8.724219 | 21.20346 | 1.19E-06 | 0.001018  | 6.250148 |
| STC2     | 1.707892 | 8.299094 | 21.03177 | 1.25E-06 | 0.001023  | 6.213488 |
| ENO2     | 1.893405 | 12.31809 | 20.8234  | 1.32E-06 | 0.00104   | 6.16835  |
| ANGPT2   | 1.539971 | 8.697005 | 20.19447 | 1.57E-06 | 0.001131  | 6.027642 |
| STC1     | 1.99289  | 6.244911 | 20.0939  | 1.62E-06 | 0.001131  | 6.004503 |
| ERRFI1   | 2.014712 | 10.42292 | 20.0205  | 1.65E-06 | 0.001131  | 5.9875   |
| PLOD2    | 1.56529  | 13.041   | 19.7924  | 1.76E-06 | 0.001131  | 5.934034 |
| SLC2A1   | 1.402732 | 9.035908 | 19.62888 | 1.85E-06 | 0.001131  | 5.895117 |
| CALHM6   | 2.154176 | 8.319076 | 19.58174 | 1.87E-06 | 0.001131  | 5.883803 |
| BHLHE40  | 1.820308 | 9.474874 | 19.48253 | 1.92E-06 | 0.001131  | 5.859857 |
| BNIP3L   | 1.760102 | 11.20795 | 19.42223 | 1.96E-06 | 0.001131  | 5.845212 |
| NDRG1    | 2.642035 | 10.63824 | 19.38827 | 1.98E-06 | 0.001131  | 5.836933 |
| BNIP3    | 1.910318 | 9.241442 | 19.34675 | 2.00E-06 | 0.001131  | 5.82678  |
| GALNT15  | 3.965421 | 6.107343 | 19.27308 | 2.05E-06 | 0.001131  | 5.808687 |
| TRAM1L1  | -1.70657 | 7.789485 | -19.0337 | 2.19E-06 | 0.001182  | 5.749155 |
| EDN2     | 3.63549  | 7.26524  | 18.66641 | 2.45E-06 | 0.001281  | 5.655575 |
| PPP1R3G  | 2.726458 | 10.06823 | 18.5242  | 2.56E-06 | 0.001281  | 5.618598 |
| NNAT     | 2.222007 | 12.65929 | 18.43672 | 2.63E-06 | 0.001281  | 5.595642 |
| RASSF4   | 1.870179 | 8.797999 | 18.43321 | 2.63E-06 | 0.001281  | 5.594717 |
| AQP1     | -2.79864 | 7.108505 | -18.3137 | 2.73E-06 | 0.001298  | 5.563084 |
| LOXL2    | 1.247896 | 14.27339 | 18.13587 | 2.88E-06 | 0.00134   | 5.515438 |
| TNFSF15  | 1.391258 | 13.83629 | 17.91579 | 3.09E-06 | 0.001403  | 5.455514 |
| PPP1R13L | 1.313847 | 11.53384 | 17.77199 | 3.23E-06 | 0.001422  | 5.415777 |

|            |          |          |          |          |          |          |
|------------|----------|----------|----------|----------|----------|----------|
| DUSP6      | 1.663628 | 8.300321 | 17.71455 | 3.29E-06 | 0.001422 | 5.39977  |
| SLC7A11    | -1.24794 | 9.71412  | -17.4984 | 3.52E-06 | 0.001422 | 5.338851 |
| IFIT3      | -1.64711 | 8.891477 | -17.4951 | 3.53E-06 | 0.001422 | 5.337924 |
| Z83844.1   | 1.927584 | 5.873891 | 17.43516 | 3.60E-06 | 0.001422 | 5.320834 |
| ARRDC3     | 1.806258 | 10.39904 | 17.42659 | 3.61E-06 | 0.001422 | 5.318387 |
| SDCBP2     | 1.58275  | 11.60737 | 17.4197  | 3.61E-06 | 0.001422 | 5.316413 |
| PDLIM2     | 1.113382 | 1.648117 | 17.12383 | 3.98E-06 | 0.001536 | 5.2307   |
| PLAT       | 1.389836 | 12.08584 | 16.24044 | 5.35E-06 | 0.002025 | 4.96177  |
| SLC2A14    | 1.362352 | 9.701011 | 16.14694 | 5.53E-06 | 0.002025 | 4.93211  |
| ZNF395     | 1.240856 | 11.74039 | 16.14155 | 5.54E-06 | 0.002025 | 4.930393 |
| FAM26F     | 2.31151  | 7.836056 | 15.58048 | 6.76E-06 | 0.002425 | 4.747228 |
| CDCP1      | 2.175789 | 7.421616 | 15.20034 | 7.76E-06 | 0.002737 | 4.617964 |
| SLAMF9     | 2.1372   | 5.522241 | 15.01243 | 8.32E-06 | 0.002884 | 4.55245  |
| TMEM45A    | 1.952936 | 8.643202 | 14.88715 | 8.71E-06 | 0.002972 | 4.508167 |
| KDM3A      | 1.364417 | 7.93084  | 14.77934 | 9.07E-06 | 0.003036 | 4.469662 |
| APOLD1     | 1.042891 | 11.51664 | 14.74298 | 9.20E-06 | 0.003036 | 4.45659  |
| SLC2A3     | 1.430785 | 8.720797 | 14.52449 | 1.00E-05 | 0.003248 | 4.37715  |
| SLC30A3    | -1.4194  | 10.06678 | -14.3651 | 1.06E-05 | 0.0034   | 4.31819  |
| AKR1B10    | -1.80528 | 6.453478 | -14.2409 | 1.12E-05 | 0.003498 | 4.271683 |
| GPR98      | 1.522433 | 6.128334 | 14.21383 | 1.13E-05 | 0.003498 | 4.261477 |
| P4HA2      | 1.428119 | 11.32063 | 14.02373 | 1.22E-05 | 0.003657 | 4.189071 |
| TUBA3E     | -1.40785 | 3.287005 | -14.0072 | 1.22E-05 | 0.003657 | 4.182721 |
| NGF        | 1.31264  | 9.041382 | 13.95393 | 1.25E-05 | 0.003657 | 4.162164 |
| ADRA1D     | 2.402252 | 5.984817 | 13.95247 | 1.25E-05 | 0.003657 | 4.161602 |
| RAB3IL1    | -1.48237 | 9.555603 | -13.8361 | 1.31E-05 | 0.003745 | 4.116347 |
| ST8SIA6    | 2.731765 | 4.526964 | 13.79013 | 1.34E-05 | 0.003745 | 4.098352 |
| NAA11      | -2.12176 | 3.005429 | -13.7889 | 1.34E-05 | 0.003745 | 4.097885 |
| NARF       | 1.057923 | 12.94821 | 13.57191 | 1.46E-05 | 0.004035 | 4.011825 |
| ASB11      | 1.144766 | 1.679514 | 13.4209  | 1.55E-05 | 0.004237 | 3.950916 |
| SDSL       | -1.19107 | 12.27531 | -13.3029 | 1.63E-05 | 0.004334 | 3.902716 |
| AKR1B15    | -1.28777 | 6.118929 | -13.1695 | 1.72E-05 | 0.004519 | 3.847585 |
| FGF16      | 1.577499 | 6.681694 | 13.13232 | 1.75E-05 | 0.004519 | 3.8321   |
| HIF3A      | 1.683092 | 6.254191 | 13.04144 | 1.82E-05 | 0.004571 | 3.794009 |
| ZFP57      | 1.564829 | 2.021206 | 13.02735 | 1.83E-05 | 0.004571 | 3.788072 |
| TGFBI      | 1.114065 | 14.30289 | 12.98015 | 1.87E-05 | 0.004608 | 3.768132 |
| SMAD7      | 1.029267 | 10.84327 | 12.77157 | 2.04E-05 | 0.004777 | 3.678941 |
| GOLGA8B    | 1.363869 | 7.790587 | 12.76068 | 2.05E-05 | 0.004777 | 3.674236 |
| NPR3       | 3.607356 | 4.43187  | 12.70691 | 2.10E-05 | 0.004782 | 3.65093  |
| DDIT4      | 1.865838 | 14.17381 | 12.67037 | 2.14E-05 | 0.004805 | 3.635025 |
| AL445524.2 | 1.131982 | 9.132603 | 12.56414 | 2.24E-05 | 0.004915 | 3.588463 |
| PNMA2      | 1.177592 | 11.98473 | 12.55662 | 2.25E-05 | 0.004915 | 3.585145 |
| HOXD1      | 1.268463 | 7.67695  | 12.54509 | 2.26E-05 | 0.004915 | 3.580058 |
| GRIN3B     | 1.516842 | 7.616688 | 12.49005 | 2.31E-05 | 0.004931 | 3.555701 |
| GYPC       | 1.574233 | 5.914899 | 12.41867 | 2.39E-05 | 0.005038 | 3.523921 |
| SIRPB2     | 1.216433 | 9.671468 | 12.32892 | 2.49E-05 | 0.005166 | 3.483642 |
| PLAC8      | 1.317872 | 13.16438 | 12.31696 | 2.50E-05 | 0.005166 | 3.47825  |
| SLC22A4    | -1.11196 | 9.77777  | -12.2483 | 2.58E-05 | 0.005234 | 3.447148 |
| HIST1H2BD  | 1.114886 | 9.308835 | 12.24298 | 2.58E-05 | 0.005234 | 3.444749 |



|            |          |          |          |          |          |          |
|------------|----------|----------|----------|----------|----------|----------|
| PRDM13     | -2.11351 | 3.058635 | -12.1823 | 2.66E-05 | 0.005234 | 3.417068 |
| ANG        | 1.012158 | 9.581899 | 12.17875 | 2.66E-05 | 0.005234 | 3.41546  |
| TNFSF18    | 1.12764  | 10.92059 | 12.13821 | 2.71E-05 | 0.00528  | 3.396883 |
| CLCA4      | -1.26087 | 2.204769 | -12.0863 | 2.77E-05 | 0.005356 | 3.372979 |
| MYCT1      | 1.013338 | 12.39055 | 11.95441 | 2.95E-05 | 0.005585 | 3.31172  |
| ITGA11     | 1.590182 | 5.381297 | 11.76742 | 3.22E-05 | 0.005982 | 3.223478 |
| HIST1H2BA  | -1.13575 | 5.279954 | -11.728  | 3.28E-05 | 0.006039 | 3.204664 |
| SIRPB1     | 1.005622 | 7.148454 | 11.65531 | 3.39E-05 | 0.006138 | 3.169777 |
| TNFRSF10D  | 1.062156 | 10.88851 | 11.4833  | 3.68E-05 | 0.006308 | 3.086206 |
| NTN4       | 1.094358 | 11.68078 | 11.46773 | 3.71E-05 | 0.006308 | 3.078574 |
| CKB        | 1.144396 | 7.31498  | 11.25274 | 4.11E-05 | 0.006843 | 2.971897 |
| UGCG       | 1.098238 | 14.76788 | 11.18974 | 4.24E-05 | 0.006944 | 2.940189 |
| PGM1       | 1.447628 | 8.800726 | 11.09099 | 4.45E-05 | 0.007215 | 2.890083 |
| DNAH5      | 2.21159  | 2.126748 | 11.08014 | 4.48E-05 | 0.007215 | 2.884546 |
| TFRC       | -1.26258 | 14.52345 | -11.0573 | 4.53E-05 | 0.00724  | 2.872888 |
| C4orf47    | 1.497736 | 6.733328 | 11.00734 | 4.64E-05 | 0.007307 | 2.847242 |
| IFIT2      | -1.27127 | 6.075889 | -10.9641 | 4.74E-05 | 0.007307 | 2.824949 |
| PLAU       | 1.066746 | 10.31005 | 10.94398 | 4.79E-05 | 0.007307 | 2.81454  |
| FOLH1B     | 1.94313  | 5.780761 | 10.91254 | 4.87E-05 | 0.007307 | 2.798235 |
| APCDD1L    | 2.100513 | 5.550271 | 10.90271 | 4.89E-05 | 0.007307 | 2.793128 |
| FYB        | -1.4224  | 1.91471  | -10.8662 | 4.98E-05 | 0.00738  | 2.774104 |
| GIMAP7     | -1.04157 | 9.369003 | -10.8544 | 5.01E-05 | 0.00738  | 2.767969 |
| GJB2       | 1.939229 | 6.01148  | 10.81937 | 5.10E-05 | 0.007458 | 2.749606 |
| C1orf110   | 1.047128 | 10.11603 | 10.72843 | 5.34E-05 | 0.007603 | 2.701683 |
| RALGPS2    | 1.025532 | 12.63457 | 10.71491 | 5.38E-05 | 0.007603 | 2.694522 |
| SLC22A23   | 1.256702 | 6.329965 | 10.6789  | 5.48E-05 | 0.007603 | 2.675395 |
| LBH        | 1.438993 | 6.389115 | 10.63057 | 5.62E-05 | 0.007603 | 2.649609 |
| SCUBE1     | 1.217662 | 4.471842 | 10.58727 | 5.75E-05 | 0.007603 | 2.626391 |
| ZNF727     | 1.145315 | 3.753961 | 10.58487 | 5.75E-05 | 0.007603 | 2.625106 |
| AC090517.4 | 2.099334 | 2.073083 | 10.57399 | 5.79E-05 | 0.007603 | 2.619252 |
| C1QL4      | 1.165693 | 7.545292 | 10.55796 | 5.83E-05 | 0.007603 | 2.610623 |
| AQP10      | 1.003187 | 5.150881 | 10.49834 | 6.02E-05 | 0.007793 | 2.578385 |
| PGM5       | 1.036937 | 7.972618 | 10.46764 | 6.11E-05 | 0.007819 | 2.56171  |
| PDE1B      | -2.15909 | 2.39618  | -10.4531 | 6.16E-05 | 0.00783  | 2.553817 |
| DUSP1      | 1.095186 | 10.2812  | 10.43334 | 6.22E-05 | 0.007862 | 2.543011 |
| INHBB      | 1.434507 | 7.353933 | 10.40866 | 6.31E-05 | 0.007916 | 2.529515 |
| MYCN       | -1.20025 | 4.96451  | -10.3881 | 6.37E-05 | 0.007953 | 2.518269 |
| TAGLN      | 1.222432 | 9.629877 | 10.25414 | 6.84E-05 | 0.008187 | 2.444214 |
| TSPAN18    | 1.164875 | 8.683715 | 10.17537 | 7.14E-05 | 0.008213 | 2.400187 |
| CDH11      | 1.070932 | 7.293387 | 10.15199 | 7.23E-05 | 0.008213 | 2.387045 |
| UBD        | -1.58326 | 6.608093 | -10.0721 | 7.54E-05 | 0.008213 | 2.341906 |
| MAGI1      | 1.029767 | 9.241988 | 10.03856 | 7.68E-05 | 0.008317 | 2.322828 |
| IDO1       | -2.26993 | 4.646755 | -9.98541 | 7.91E-05 | 0.008471 | 2.292469 |
| GUCY1B3    | -1.50751 | 3.601006 | -9.94691 | 8.08E-05 | 0.008561 | 2.270365 |
| CNTN1      | 1.080576 | 1.626696 | 9.925976 | 8.17E-05 | 0.008571 | 2.258309 |
| CD82       | 1.147492 | 9.953857 | 9.886444 | 8.35E-05 | 0.008583 | 2.235468 |
| EEF1A2     | 1.248432 | 10.19184 | 9.838381 | 8.57E-05 | 0.008691 | 2.207564 |
| STARD6     | -1.17236 | 4.473641 | -9.83671 | 8.58E-05 | 0.008691 | 2.206593 |

|                   |          |          |          |          |          |          |
|-------------------|----------|----------|----------|----------|----------|----------|
| CHRN1             | 1.396422 | 7.467052 | 9.81781  | 8.67E-05 | 0.008739 | 2.195577 |
| RNF39             | 1.671898 | 2.671906 | 9.785351 | 8.83E-05 | 0.008783 | 2.176607 |
| MTL5              | 1.030793 | 7.074448 | 9.782298 | 8.84E-05 | 0.008783 | 2.17482  |
| FST               | -1.16121 | 8.066464 | -9.74325 | 9.04E-05 | 0.008865 | 2.151903 |
| SIM2              | 2.367198 | 2.208506 | 9.742825 | 9.04E-05 | 0.008865 | 2.151652 |
| GIMAP1-<br>GIMAP5 | 1.118675 | 11.1303  | 9.739589 | 9.05E-05 | 0.008865 | 2.149749 |
| VLDLR             | 3.027257 | 4.938313 | 9.701459 | 9.25E-05 | 0.00897  | 2.127267 |
| NPPB              | 1.565968 | 6.549604 | 9.673578 | 9.39E-05 | 0.009056 | 2.110768 |
| VSTM1             | 1.62119  | 5.602455 | 9.619829 | 9.68E-05 | 0.009122 | 2.07882  |
| ZNF704            | 1.094143 | 8.570992 | 9.613384 | 9.72E-05 | 0.009122 | 2.074976 |
| HLA-DPB1          | -1.30031 | 2.904916 | -9.58373 | 9.88E-05 | 0.00915  | 2.057254 |
| GIMAP5            | 1.634035 | 6.007199 | 9.442537 | 0.000107 | 0.009486 | 1.972084 |
| IFIT1             | -2.2286  | 9.404754 | -9.41283 | 0.000109 | 0.009548 | 1.953992 |
| WISP2             | 1.554583 | 5.746328 | 9.412827 | 0.000109 | 0.009548 | 1.953992 |
| CDKN1C            | 1.017379 | 8.16387  | 9.408692 | 0.000109 | 0.009548 | 1.951469 |
| WFDC10B           | 1.387829 | 4.120345 | 9.298189 | 0.000116 | 0.009924 | 1.883618 |
| RAB40B            | 1.031963 | 4.860484 | 9.129474 | 0.000128 | 0.010428 | 1.778389 |
| MAGED4            | 1.162137 | 8.278926 | 9.121324 | 0.000129 | 0.010428 | 1.773255 |
| TCF7L1            | 1.415853 | 8.401753 | 9.119441 | 0.000129 | 0.010428 | 1.772068 |
| TNFRSF1B          | -1.09836 | 9.766683 | -9.07579 | 0.000133 | 0.010493 | 1.744483 |
| DOK7              | -1.09943 | 8.75354  | -9.0083  | 0.000138 | 0.01055  | 1.701567 |
| PAEP              | 1.287881 | 1.792579 | 9.0037   | 0.000138 | 0.01055  | 1.698631 |
| MEDAG             | 1.065166 | 9.25539  | 8.977293 | 0.000141 | 0.01055  | 1.68174  |
| ZCCHC5            | 1.32485  | 5.808991 | 8.97631  | 0.000141 | 0.01055  | 1.68111  |
| BACE2             | 1.501251 | 7.350341 | 8.96445  | 0.000142 | 0.01055  | 1.673507 |
| SIRPD             | 2.015459 | 4.188011 | 8.964007 | 0.000142 | 0.01055  | 1.673222 |
| CORIN             | -1.51455 | 4.409398 | -8.90611 | 0.000147 | 0.01069  | 1.635954 |
| AKAP12            | 1.283184 | 14.85612 | 8.892456 | 0.000148 | 0.01069  | 1.627131 |
| BCL2A1            | 1.375752 | 6.86016  | 8.889659 | 0.000148 | 0.01069  | 1.625321 |
| PRB3              | -1.01921 | 9.09711  | -8.84003 | 0.000153 | 0.01085  | 1.593121 |
| ELMOD1            | -1.65533 | 7.10417  | -8.83594 | 0.000153 | 0.01085  | 1.590458 |
| FGF1              | 1.612364 | 6.743932 | 8.824518 | 0.000154 | 0.01087  | 1.583016 |
| EDIL3             | 1.165954 | 9.780367 | 8.79657  | 0.000157 | 0.010951 | 1.564768 |
| COL5A1            | 1.00971  | 11.41852 | 8.704778 | 0.000166 | 0.011436 | 1.50442  |
| IGFBP5            | 1.547374 | 8.983475 | 8.667381 | 0.00017  | 0.01165  | 1.479651 |
| C6orf223          | 1.283301 | 1.668157 | 8.648613 | 0.000172 | 0.01165  | 1.467179 |
| UPB1              | 4.094258 | 4.144979 | 8.642836 | 0.000172 | 0.01165  | 1.463335 |
| GJD4              | 1.802157 | 2.340978 | 8.57966  | 0.000179 | 0.011802 | 1.421126 |
| TBC1D3B           | 1.008058 | 5.676492 | 8.552618 | 0.000182 | 0.011843 | 1.402964 |
| HPGDS             | 2.067485 | 2.133964 | 8.537466 | 0.000184 | 0.011843 | 1.392763 |
| YPEL1             | 1.094553 | 8.370638 | 8.510464 | 0.000187 | 0.011904 | 1.374538 |
| CRTAC1            | 1.135401 | 7.419296 | 8.489589 | 0.00019  | 0.01199  | 1.360409 |
| AMY2A             | 1.169698 | 3.960214 | 8.460447 | 0.000193 | 0.012089 | 1.340628 |
| OAS2              | -1.10826 | 8.410634 | -8.39115 | 0.000202 | 0.012296 | 1.293316 |
| PDGFRL            | 1.040556 | 7.628455 | 8.382565 | 0.000203 | 0.012296 | 1.287429 |
| PPARG             | 1.279443 | 5.951305 | 8.325858 | 0.000211 | 0.012527 | 1.248387 |
| LMNTD2            | 1.041416 | 8.919218 | 8.318896 | 0.000212 | 0.012546 | 1.243576 |

|            |          |          |          |          |          |          |
|------------|----------|----------|----------|----------|----------|----------|
| PTGES      | -1.88982 | 2.369153 | -8.31172 | 0.000213 | 0.012567 | 1.238616 |
| CXorf58    | 1.512282 | 1.990722 | 8.300844 | 0.000214 | 0.012609 | 1.231082 |
| BGN        | 1.136884 | 11.73218 | 8.222844 | 0.000225 | 0.012924 | 1.176791 |
| RSAD2      | -2.26289 | 3.973807 | -8.2068  | 0.000227 | 0.012924 | 1.165563 |
| VCAM1      | -1.42494 | 5.059256 | -8.09254 | 0.000245 | 0.013347 | 1.084967 |
| GPR88      | -1.55844 | 2.037971 | -8.07374 | 0.000248 | 0.013426 | 1.071602 |
| CCDC64     | -1.00795 | 3.231064 | -8.06183 | 0.00025  | 0.013496 | 1.063117 |
| NCKAP5     | 1.037835 | 7.627235 | 8.028858 | 0.000255 | 0.013571 | 1.039568 |
| SGIP1      | 1.041652 | 9.906044 | 7.997773 | 0.000261 | 0.013682 | 1.017282 |
| GDF5       | 1.474377 | 5.410378 | 7.95012  | 0.000269 | 0.013883 | 0.982955 |
| MN1        | 1.176062 | 11.10691 | 7.932911 | 0.000272 | 0.01394  | 0.97051  |
| TMEM98     | 1.094599 | 5.447766 | 7.879842 | 0.000282 | 0.014051 | 0.93197  |
| TIMP3      | 1.103216 | 6.406833 | 7.837005 | 0.00029  | 0.014249 | 0.90068  |
| IFI44L     | -2.00862 | 5.558661 | -7.81391 | 0.000295 | 0.014276 | 0.883742 |
| MAP3K9     | -1.47603 | 2.113541 | -7.78297 | 0.000301 | 0.014414 | 0.860981 |
| CCDC89     | -1.76927 | 2.104651 | -7.7593  | 0.000306 | 0.014498 | 0.843502 |
| SNX33      | 1.31622  | 6.465924 | 7.739067 | 0.00031  | 0.014596 | 0.828528 |
| AL355987.3 | 1.339644 | 6.637541 | 7.721992 | 0.000314 | 0.014596 | 0.81586  |
| FAM83G     | -1.06707 | 8.932657 | -7.71799 | 0.000315 | 0.014596 | 0.812887 |
| CHST2      | 1.016828 | 7.887761 | 7.700723 | 0.000319 | 0.014682 | 0.800045 |
| OLFML2B    | 1.132571 | 2.790328 | 7.69738  | 0.000319 | 0.014682 | 0.797555 |
| CSF3       | -1.28496 | 7.200749 | -7.61092 | 0.000339 | 0.014976 | 0.732811 |
| KLHDC7A    | -1.37966 | 7.288983 | -7.58405 | 0.000345 | 0.014996 | 0.712547 |
| CD48       | 1.348691 | 1.982554 | 7.543074 | 0.000355 | 0.015143 | 0.681522 |
| CNTNAP2    | -1.64244 | 2.1181   | -7.51188 | 0.000363 | 0.015316 | 0.657794 |
| MTRNR2L11  | -1.23182 | 7.548585 | -7.45041 | 0.000379 | 0.0157   | 0.610774 |
| CCL23      | -1.34857 | 5.792329 | -7.43382 | 0.000383 | 0.01571  | 0.598029 |
| CCDC27     | -1.03268 | 5.330677 | -7.42071 | 0.000387 | 0.015777 | 0.587928 |
| TNNI3      | 1.293363 | 4.374053 | 7.401333 | 0.000392 | 0.015868 | 0.572979 |
| SHC2       | 1.071064 | 7.447597 | 7.351962 | 0.000406 | 0.016054 | 0.534721 |
| CCDC183    | 1.602837 | 5.773296 | 7.33639  | 0.000411 | 0.01617  | 0.522607 |
| BCL2L12    | -1.07907 | 7.780948 | -7.27712 | 0.000429 | 0.016528 | 0.476274 |
| ETDB       | -1.25402 | 2.747711 | -7.27624 | 0.000429 | 0.016528 | 0.475589 |
| DPEP2      | 1.769225 | 2.118419 | 7.240984 | 0.00044  | 0.016705 | 0.447862 |
| OPRL1      | 1.083088 | 8.535061 | 7.17134  | 0.000463 | 0.017218 | 0.392734 |
| CLEC3B     | 1.119455 | 5.843415 | 7.153962 | 0.000469 | 0.017342 | 0.378903 |
| OR7G3      | -1.42926 | 4.025544 | -7.12994 | 0.000477 | 0.017366 | 0.359736 |
| EFNB3      | 1.094795 | 6.520137 | 7.097579 | 0.000488 | 0.017563 | 0.333819 |
| IVL        | -2.2768  | 3.972095 | -7.02492 | 0.000515 | 0.018208 | 0.275246 |
| PDK1       | 1.19894  | 6.063073 | 6.992722 | 0.000528 | 0.018236 | 0.249117 |
| TM4SF4     | -1.18798 | 8.549649 | -6.98903 | 0.000529 | 0.018236 | 0.246114 |
| PFKFB4     | 1.885872 | 4.313516 | 6.974884 | 0.000535 | 0.018236 | 0.234595 |
| C1orf21    | 1.519416 | 4.534483 | 6.966753 | 0.000538 | 0.018236 | 0.227965 |
| IFNLR1     | -1.25859 | 5.590582 | -6.92587 | 0.000555 | 0.018364 | 0.194522 |
| GPR142     | -1.06556 | 5.69123  | -6.90493 | 0.000563 | 0.018504 | 0.177331 |
| CENPS-CORT | -1.30483 | 1.921696 | -6.87944 | 0.000574 | 0.018711 | 0.156337 |
| OR7D4      | 1.908205 | 4.548306 | 6.869131 | 0.000579 | 0.018738 | 0.147824 |
| ASB18      | -1.1716  | 4.000564 | -6.84822 | 0.000588 | 0.018886 | 0.130524 |

|            |          |          |          |          |          |          |
|------------|----------|----------|----------|----------|----------|----------|
| FBLN7      | 1.213581 | 7.374447 | 6.801046 | 0.000609 | 0.019204 | 0.091337 |
| NKX2-2     | -1.61985 | 2.017078 | -6.78207 | 0.000618 | 0.019303 | 0.075501 |
| DENND6B    | 1.049043 | 2.199238 | 6.769371 | 0.000624 | 0.019395 | 0.064889 |
| HERC5      | -1.12674 | 5.383361 | -6.76208 | 0.000628 | 0.01943  | 0.058783 |
| ADCYAP1    | -1.43755 | 4.421955 | -6.71184 | 0.000652 | 0.019831 | 0.016578 |
| PTGIS      | 1.700034 | 7.145168 | 6.62251  | 0.000699 | 0.020664 | -0.05915 |
| IFI44      | -1.18028 | 6.653671 | -6.60159 | 0.00071  | 0.020856 | -0.07701 |
| SLIT1      | 1.057556 | 1.578382 | 6.599144 | 0.000712 | 0.02086  | -0.07911 |
| NRG2       | -1.17751 | 6.6324   | -6.58385 | 0.00072  | 0.020998 | -0.0922  |
| C19orf67   | -1.60251 | 2.393964 | -6.574   | 0.000726 | 0.021001 | -0.10064 |
| PLA2G4A    | -1.372   | 5.739979 | -6.57158 | 0.000727 | 0.021011 | -0.10272 |
| MXI1       | 1.003784 | 5.947138 | 6.566203 | 0.00073  | 0.021011 | -0.10734 |
| WDR64      | -1.6329  | 4.116791 | -6.54086 | 0.000745 | 0.021307 | -0.12915 |
| MX2        | -1.57374 | 7.417144 | -6.52017 | 0.000757 | 0.021441 | -0.14699 |
| CPT1B      | 1.034352 | 6.41953  | 6.502375 | 0.000768 | 0.02156  | -0.16239 |
| SLCO4A1    | 1.046465 | 8.752495 | 6.488432 | 0.000776 | 0.021578 | -0.17447 |
| CFAP161    | -1.56843 | 2.530058 | -6.46649 | 0.00079  | 0.021578 | -0.19354 |
| CLVS2      | 1.401951 | 1.779534 | 6.443161 | 0.000804 | 0.021716 | -0.21387 |
| VIP        | 1.030271 | 6.088871 | 6.411693 | 0.000825 | 0.021903 | -0.24139 |
| PROC       | -1.59127 | 4.206969 | -6.40209 | 0.000831 | 0.021944 | -0.24981 |
| LRRN2      | -1.50673 | 2.0631   | -6.38992 | 0.000839 | 0.021955 | -0.2605  |
| MRGPRX3    | 2.120672 | 2.874146 | 6.35995  | 0.000859 | 0.022177 | -0.28689 |
| SPINT2     | 1.191602 | 7.096956 | 6.292247 | 0.000908 | 0.022819 | -0.34688 |
| CXCL10     | -2.01577 | 4.614833 | -6.27744 | 0.000918 | 0.022974 | -0.36008 |
| PDE6A      | 1.129534 | 1.837167 | 6.273712 | 0.000921 | 0.022997 | -0.3634  |
| ELSPBP1    | -1.53791 | 3.147713 | -6.24917 | 0.00094  | 0.023056 | -0.38534 |
| GRAMD2     | -1.36139 | 2.024386 | -6.2149  | 0.000966 | 0.023427 | -0.41608 |
| CNGA1      | 1.22645  | 1.912823 | 6.185467 | 0.00099  | 0.023828 | -0.44261 |
| AL139142.2 | 1.423011 | 3.554369 | 6.181389 | 0.000993 | 0.023844 | -0.44629 |
| KIAA1524   | -1.89209 | 2.749975 | -6.17148 | 0.001001 | 0.023954 | -0.45524 |
| LYVE1      | -1.56463 | 9.496664 | -6.16159 | 0.001009 | 0.024072 | -0.46419 |
| NFATC2     | 1.17554  | 4.994622 | 6.139248 | 0.001028 | 0.02442  | -0.48446 |
| CABP1      | 1.069324 | 1.973361 | 6.112394 | 0.001051 | 0.024558 | -0.50889 |
| MX1        | -1.20089 | 5.148848 | -6.11083 | 0.001052 | 0.024558 | -0.51032 |
| FAM47E     | -1.85674 | 2.091611 | -6.08794 | 0.001073 | 0.024621 | -0.53122 |
| SLC45A1    | 1.107991 | 4.756631 | 6.021103 | 0.001134 | 0.02521  | -0.59261 |
| BPIFA2     | 1.214647 | 1.880202 | 6.019009 | 0.001136 | 0.02521  | -0.59454 |
| RTP3       | 1.586473 | 3.983129 | 5.992687 | 0.001161 | 0.025375 | -0.61888 |
| FIBIN      | 1.276805 | 1.659839 | 5.97885  | 0.001175 | 0.025375 | -0.6317  |
| KRT73      | -1.19625 | 5.862883 | -5.9772  | 0.001176 | 0.025375 | -0.63323 |
| UGT2A1     | -1.00191 | 4.62295  | -5.94527 | 0.001209 | 0.025705 | -0.66293 |
| ASAH2      | 1.046096 | 1.608132 | 5.897764 | 0.001258 | 0.026215 | -0.70735 |
| ALG12      | 1.156051 | 4.809496 | 5.886879 | 0.00127  | 0.026324 | -0.71756 |
| GTSF1L     | -1.18893 | 6.417396 | -5.87936 | 0.001278 | 0.026346 | -0.72463 |
| GPR18      | -1.59926 | 2.950764 | -5.86697 | 0.001291 | 0.026426 | -0.73629 |
| GUCY1A3    | -1.35903 | 2.825465 | -5.82483 | 0.001339 | 0.026716 | -0.77609 |
| TLE2       | 1.038391 | 6.765434 | 5.792873 | 0.001376 | 0.02705  | -0.80642 |
| COLQ       | 2.154428 | 3.908292 | 5.792847 | 0.001376 | 0.02705  | -0.80644 |

|          |          |          |          |          |          |          |
|----------|----------|----------|----------|----------|----------|----------|
| SEMA4B   | 1.111791 | 6.490399 | 5.789917 | 0.00138  | 0.027065 | -0.80923 |
| RGMA     | -1.08039 | 5.445007 | -5.77941 | 0.001392 | 0.027207 | -0.81923 |
| PLD4     | 1.991644 | 2.273385 | 5.775975 | 0.001396 | 0.027262 | -0.82251 |
| ERBB4    | -1.81249 | 2.29657  | -5.75949 | 0.001416 | 0.027505 | -0.83824 |
| PRR15    | -1.24681 | 7.073447 | -5.75508 | 0.001422 | 0.027574 | -0.84246 |
| SP140    | -1.60737 | 2.998665 | -5.74309 | 0.001437 | 0.027756 | -0.85392 |
| RNF17    | 1.769759 | 2.616997 | 5.725322 | 0.001459 | 0.028081 | -0.87096 |
| NEURL3   | -1.58995 | 3.65241  | -5.70399 | 0.001486 | 0.028446 | -0.89147 |
| OAS1     | -1.00815 | 9.166775 | -5.70292 | 0.001488 | 0.028446 | -0.89249 |
| SLC39A5  | 1.025107 | 4.9722   | 5.655632 | 0.00155  | 0.029022 | -0.93816 |
| OR1S1    | -1.58809 | 2.410272 | -5.58643 | 0.001648 | 0.029579 | -1.00552 |
| LRRC25   | -1.3652  | 2.351943 | -5.58561 | 0.001649 | 0.029579 | -1.00633 |
| RAB33A   | 1.175968 | 7.617539 | 5.575578 | 0.001663 | 0.029741 | -1.01614 |
| RTP4     | -1.40303 | 5.866726 | -5.54685 | 0.001706 | 0.029959 | -1.04433 |
| GDF7     | 1.199194 | 1.661859 | 5.545371 | 0.001709 | 0.029959 | -1.04579 |
| SNAI2    | 1.218895 | 5.167253 | 5.490261 | 0.001795 | 0.030828 | -1.10018 |
| ZBTB8B   | -1.78285 | 3.776259 | -5.48032 | 0.001811 | 0.030902 | -1.11003 |
| ACP5     | -2.18302 | 7.412682 | -5.46949 | 0.001828 | 0.030997 | -1.12078 |
| UCMA     | 1.308835 | 2.142528 | 5.468237 | 0.001831 | 0.031007 | -1.12203 |
| FLT3LG   | 1.559321 | 2.155967 | 5.465162 | 0.001836 | 0.031032 | -1.12509 |
| FAM189A2 | 1.069924 | 5.566555 | 5.4579   | 0.001848 | 0.03109  | -1.13231 |
| GALNT5   | 2.333656 | 2.218347 | 5.444071 | 0.001871 | 0.031197 | -1.14608 |
| CLEC1B   | -1.66233 | 4.931031 | -5.44306 | 0.001872 | 0.0312   | -1.1471  |
| NAV1     | 1.26714  | 4.765512 | 5.439155 | 0.001879 | 0.031259 | -1.15099 |
| DOK2     | 1.329104 | 5.691398 | 5.395507 | 0.001955 | 0.03187  | -1.19466 |
| TRMT1    | -1.5033  | 2.433424 | -5.34847 | 0.00204  | 0.032664 | -1.242   |
| HERC6    | -1.23382 | 6.197603 | -5.34733 | 0.002042 | 0.032664 | -1.24315 |
| HS3ST5   | 1.869334 | 3.218709 | 5.323671 | 0.002087 | 0.032974 | -1.26709 |
| ADAMTS8  | -1.1664  | 1.700065 | -5.29939 | 0.002134 | 0.033458 | -1.29173 |
| MIA      | 1.306055 | 4.527076 | 5.292401 | 0.002148 | 0.033505 | -1.29885 |
| CMA1     | -1.12531 | 3.333573 | -5.28588 | 0.00216  | 0.033634 | -1.30548 |
| PLEKHB1  | 1.122122 | 4.432424 | 5.283129 | 0.002166 | 0.033652 | -1.30829 |
| ARX      | 1.128892 | 4.390212 | 5.281264 | 0.00217  | 0.033685 | -1.31019 |
| BPIFC    | -1.72147 | 3.322869 | -5.20862 | 0.002321 | 0.03457  | -1.38459 |
| CTSW     | 1.73969  | 1.941441 | 5.199629 | 0.00234  | 0.034753 | -1.39385 |
| DRD5     | 1.335992 | 2.825996 | 5.191572 | 0.002358 | 0.034835 | -1.40215 |
| S1PR5    | -1.3295  | 2.022328 | -5.15492 | 0.00244  | 0.035382 | -1.44006 |
| HEY2     | -1.20903 | 8.519626 | -5.14664 | 0.002459 | 0.03543  | -1.44864 |
| CHRNA1   | 1.158412 | 6.11305  | 5.142554 | 0.002468 | 0.035445 | -1.45289 |
| CCDC158  | 1.975853 | 2.402461 | 5.134107 | 0.002488 | 0.035574 | -1.46167 |
| OR2G2    | 1.793935 | 2.378547 | 5.09612  | 0.002578 | 0.036198 | -1.50126 |
| DNAH1    | 1.795003 | 3.062744 | 5.090089 | 0.002593 | 0.03622  | -1.50757 |
| ODF3B    | 1.031778 | 7.132211 | 5.035701 | 0.00273  | 0.037325 | -1.56466 |
| CPLX1    | 1.06917  | 4.423434 | 4.95675  | 0.002945 | 0.038847 | -1.6483  |
| C16orf89 | -1.25166 | 6.558544 | -4.95122 | 0.00296  | 0.038904 | -1.65419 |
| CT62     | 1.62401  | 2.596785 | 4.948293 | 0.002969 | 0.038964 | -1.65731 |
| DDIT4L   | 1.535585 | 4.760148 | 4.919447 | 0.003052 | 0.039707 | -1.68813 |
| KISS1R   | 2.025103 | 3.142551 | 4.904755 | 0.003096 | 0.039964 | -1.70387 |

|            |          |          |          |          |          |          |
|------------|----------|----------|----------|----------|----------|----------|
| GIPC3      | 1.007806 | 5.560157 | 4.870941 | 0.0032   | 0.040407 | -1.74022 |
| LYZL4      | 1.837507 | 2.654449 | 4.869888 | 0.003203 | 0.040407 | -1.74135 |
| EVX1       | 1.930453 | 2.028653 | 4.867912 | 0.003209 | 0.040407 | -1.74348 |
| OVOL3      | -1.12114 | 2.298645 | -4.83369 | 0.003318 | 0.040954 | -1.78046 |
| AC007846.2 | -1.12333 | 1.8852   | -4.83357 | 0.003318 | 0.040954 | -1.78059 |
| FBLN2      | 1.117859 | 5.150255 | 4.833539 | 0.003318 | 0.040954 | -1.78062 |
| ASCL3      | -1.28816 | 2.834138 | -4.82238 | 0.003355 | 0.041238 | -1.79272 |
| ZNF716     | 1.556204 | 1.873509 | 4.813977 | 0.003383 | 0.041303 | -1.80183 |
| SH3D21     | 1.088955 | 6.837822 | 4.786743 | 0.003474 | 0.041546 | -1.83146 |
| CCND2      | 1.144583 | 4.124596 | 4.780238 | 0.003497 | 0.041599 | -1.83855 |
| KCNV1      | 1.254887 | 4.494458 | 4.764975 | 0.00355  | 0.041829 | -1.85522 |
| C11orf40   | -1.37438 | 2.165805 | -4.75491 | 0.003585 | 0.041988 | -1.86623 |
| SLC22A18AS | -1.11419 | 4.679711 | -4.74772 | 0.003611 | 0.042172 | -1.8741  |
| LIPI       | -1.06097 | 5.758688 | -4.74555 | 0.003619 | 0.042191 | -1.87647 |
| PRKAG3     | -1.27951 | 3.529152 | -4.71649 | 0.003724 | 0.042802 | -1.90838 |
| NDUFA4L2   | 1.247862 | 3.950521 | 4.701631 | 0.00378  | 0.043142 | -1.92475 |
| PRG2       | 1.803976 | 3.055893 | 4.699215 | 0.003789 | 0.043147 | -1.92741 |
| FGF3       | -1.37911 | 2.785203 | -4.69918 | 0.003789 | 0.043147 | -1.92746 |
| CBX2       | 1.310182 | 9.280386 | 4.674538 | 0.003884 | 0.043694 | -1.95467 |
| RHD        | 1.159805 | 3.645683 | 4.661266 | 0.003936 | 0.043957 | -1.96937 |
| FAS        | -1.07345 | 8.65245  | -4.6471  | 0.003992 | 0.044288 | -1.98509 |
| CCDC79     | 1.298913 | 2.09821  | 4.645187 | 0.004    | 0.044288 | -1.98721 |
| KIF17      | 1.383295 | 3.730652 | 4.622146 | 0.004093 | 0.044706 | -2.01285 |
| TP63       | -1.70205 | 2.020279 | -4.60408 | 0.004169 | 0.045154 | -2.03301 |
| OR2L3      | -2.01187 | 2.821836 | -4.60252 | 0.004175 | 0.045164 | -2.03474 |
| OR12D2     | 1.160863 | 4.114683 | 4.592064 | 0.004219 | 0.045322 | -2.04643 |
| PPIAL4G    | 1.363675 | 2.301669 | 4.579363 | 0.004274 | 0.045597 | -2.06066 |
| C2orf57    | 1.023064 | 3.125316 | 4.555965 | 0.004377 | 0.046185 | -2.08692 |
| PEBP4      | -1.14812 | 2.27169  | -4.54545 | 0.004424 | 0.046447 | -2.09874 |
| FRMPD4     | 2.229981 | 5.655234 | 4.544515 | 0.004428 | 0.046447 | -2.0998  |
| IL17F      | -1.41533 | 2.070603 | -4.53454 | 0.004473 | 0.046656 | -2.11104 |
| PIWIL4     | 1.201886 | 3.931234 | 4.534474 | 0.004474 | 0.046656 | -2.11111 |
| SDR16C5    | 1.157721 | 1.854544 | 4.529019 | 0.004499 | 0.046799 | -2.11727 |
| SLC6A9     | 1.044144 | 3.908463 | 4.528468 | 0.004501 | 0.046799 | -2.11789 |
| FRAS1      | 1.095279 | 5.0345   | 4.524645 | 0.004519 | 0.046934 | -2.1222  |
| OPRPN      | 1.196033 | 1.677291 | 4.522809 | 0.004527 | 0.046951 | -2.12428 |
| SIAE       | 1.097048 | 5.21196  | 4.498895 | 0.004639 | 0.04743  | -2.15132 |
| MC5R       | -1.18735 | 1.984079 | -4.49765 | 0.004645 | 0.04743  | -2.15274 |
| OR8J3      | 1.017064 | 8.779919 | 4.458124 | 0.004838 | 0.04845  | -2.19764 |
| SDK1       | 1.087083 | 3.259103 | 4.44349  | 0.004911 | 0.048732 | -2.21432 |
| TSPO2      | -1.63457 | 2.392393 | -4.39818 | 0.005147 | 0.049822 | -2.26619 |
| CALCR      | -1.08808 | 2.453937 | -4.39295 | 0.005175 | 0.049952 | -2.2722  |
| IGHV2-5    | -1.57266 | 2.574921 | -4.3908  | 0.005187 | 0.050017 | -2.27467 |
| NBPF6      | 1.403535 | 2.147958 | 4.382375 | 0.005233 | 0.05022  | -2.28435 |
| CALY       | 1.539346 | 2.470915 | 4.379199 | 0.00525  | 0.050245 | -2.28801 |
| CIDEA      | 1.180741 | 6.137302 | 4.366402 | 0.00532  | 0.050673 | -2.30275 |
| TBC1D29    | -1.20222 | 4.750646 | -4.36423 | 0.005333 | 0.050703 | -2.30525 |
| OR2W3      | 1.097096 | 1.620945 | 4.359383 | 0.00536  | 0.050867 | -2.31084 |

|            |          |          |          |          |          |          |
|------------|----------|----------|----------|----------|----------|----------|
| CAPN12     | 1.082408 | 3.873228 | 4.339813 | 0.00547  | 0.051312 | -2.33346 |
| DMGDH      | 1.072728 | 2.336507 | 4.332155 | 0.005515 | 0.051407 | -2.34232 |
| C3orf36    | -1.7264  | 3.391578 | -4.32831 | 0.005537 | 0.051521 | -2.34678 |
| ST18       | 1.452538 | 2.207218 | 4.311191 | 0.005637 | 0.05196  | -2.36664 |
| S100A7A    | 1.480619 | 1.942486 | 4.306311 | 0.005666 | 0.052086 | -2.37231 |
| MOGAT2     | -1.092   | 6.814661 | -4.28819 | 0.005776 | 0.052774 | -2.39339 |
| T          | 2.482475 | 2.877232 | 4.287157 | 0.005782 | 0.052792 | -2.39459 |
| GOLGA6L22  | 1.192025 | 1.621924 | 4.269828 | 0.005889 | 0.053297 | -2.41481 |
| VWA7       | -1.25108 | 4.869012 | -4.26641 | 0.00591  | 0.053438 | -2.4188  |
| OR2C1      | 1.519765 | 2.54482  | 4.265685 | 0.005915 | 0.053456 | -2.41965 |
| TAS1R1     | 1.692907 | 2.161548 | 4.239658 | 0.00608  | 0.054566 | -2.45011 |
| ACSS3      | -1.24049 | 8.922816 | -4.23488 | 0.006111 | 0.054604 | -2.45572 |
| DYDC2      | -1.13532 | 4.620921 | -4.22529 | 0.006174 | 0.054839 | -2.46697 |
| LUM        | -1.33883 | 5.408506 | -4.19952 | 0.006346 | 0.055512 | -2.49729 |
| PPL        | 1.552518 | 3.756494 | 4.191823 | 0.006398 | 0.055762 | -2.50636 |
| OR5A2      | 1.146411 | 3.464804 | 4.189912 | 0.006411 | 0.055847 | -2.50862 |
| ATP6V1G3   | -1.88007 | 3.448172 | -4.16347 | 0.006595 | 0.056705 | -2.53987 |
| TGIF2LX    | -1.6717  | 1.95026  | -4.16344 | 0.006596 | 0.056705 | -2.5399  |
| TMEM40     | 1.146568 | 3.236862 | 4.156719 | 0.006643 | 0.056829 | -2.54787 |
| GYS2       | 1.070177 | 1.613637 | 4.136153 | 0.006792 | 0.057381 | -2.57227 |
| AQPEP      | 1.098041 | 1.606317 | 4.085974 | 0.007171 | 0.058856 | -2.63209 |
| ITK        | 1.358264 | 1.93352  | 4.072212 | 0.007279 | 0.059222 | -2.64856 |
| TENM2      | -1.19104 | 2.321261 | -4.04296 | 0.007514 | 0.060298 | -2.68368 |
| AMER3      | 1.558653 | 2.214165 | 4.033101 | 0.007596 | 0.060523 | -2.69554 |
| SELL       | -1.227   | 4.474594 | -4.03146 | 0.007609 | 0.060551 | -2.69751 |
| CAMKV      | 1.059913 | 2.02275  | 4.025324 | 0.007661 | 0.060707 | -2.70491 |
| C13orf46   | 2.109988 | 2.606797 | 4.018082 | 0.007722 | 0.060859 | -2.71364 |
| TMEM130    | -1.09255 | 2.925837 | -4.01784 | 0.007724 | 0.060859 | -2.71393 |
| DEFB125    | 1.086835 | 1.983285 | 4.015364 | 0.007745 | 0.060961 | -2.71692 |
| GZMA       | 1.172654 | 5.373665 | 3.884155 | 0.008954 | 0.066047 | -2.87657 |
| RBMX1F     | -1.52253 | 2.49543  | -3.8831  | 0.008964 | 0.066059 | -2.87786 |
| NKX6-1     | 1.341729 | 1.771038 | 3.878334 | 0.009012 | 0.066167 | -2.88371 |
| KCTD16     | 1.065081 | 5.300924 | 3.856511 | 0.009235 | 0.06708  | -2.91054 |
| DEFB115    | 1.108597 | 1.722776 | 3.848893 | 0.009314 | 0.067342 | -2.91992 |
| SPINK4     | 1.152224 | 3.427088 | 3.847555 | 0.009328 | 0.067342 | -2.92157 |
| TCEB3C     | 1.007382 | 3.184418 | 3.846663 | 0.009337 | 0.067342 | -2.92267 |
| TBX15      | 1.527258 | 2.30387  | 3.837256 | 0.009436 | 0.067685 | -2.93427 |
| C1orf131   | -1.2137  | 7.843965 | -3.83682 | 0.009441 | 0.067685 | -2.93481 |
| OR10A6     | -1.08676 | 1.941564 | -3.8292  | 0.009522 | 0.067914 | -2.94421 |
| RBFOX1     | 1.118855 | 3.60217  | 3.826568 | 0.009551 | 0.068068 | -2.94747 |
| AC074143.1 | 1.414612 | 4.240866 | 3.822941 | 0.00959  | 0.068133 | -2.95195 |
| EREG       | -1.03625 | 2.080869 | -3.81286 | 0.009699 | 0.068601 | -2.96442 |
| AC127029.3 | -1.15177 | 2.847052 | -3.79972 | 0.009844 | 0.06916  | -2.9807  |
| MACROD2    | 1.701891 | 4.818088 | 3.793066 | 0.009918 | 0.069316 | -2.98895 |
| KRTAP10-4  | 1.513378 | 2.696114 | 3.780111 | 0.010064 | 0.07     | -3.00503 |
| OR10A3     | 1.12679  | 1.718295 | 3.769825 | 0.010182 | 0.070457 | -3.01782 |
| SSC4D      | -1.32987 | 2.529026 | -3.76626 | 0.010224 | 0.070627 | -3.02226 |
| MAFA       | -1.64175 | 2.506641 | -3.76145 | 0.01028  | 0.07087  | -3.02825 |



|           |          |          |          |          |          |          |
|-----------|----------|----------|----------|----------|----------|----------|
| HTR5A     | 1.031038 | 1.602958 | 3.761448 | 0.01028  | 0.07087  | -3.02825 |
| HIST1H4G  | -1.58742 | 2.773725 | -3.7476  | 0.010443 | 0.071554 | -3.04551 |
| TRAV8-6   | 1.476763 | 3.637696 | 3.745621 | 0.010466 | 0.071624 | -3.04798 |
| SEMG2     | 1.933697 | 3.551691 | 3.730344 | 0.01065  | 0.07233  | -3.06705 |
| DMRT3     | -1.36824 | 2.052885 | -3.71776 | 0.010804 | 0.072755 | -3.0828  |
| KHDRBS2   | 1.051205 | 2.138547 | 3.715816 | 0.010828 | 0.072808 | -3.08523 |
| LIF       | 1.453525 | 2.571864 | 3.715813 | 0.010828 | 0.072808 | -3.08523 |
| ALLC      | 1.402114 | 2.443857 | 3.706732 | 0.010941 | 0.073125 | -3.09661 |
| GREM2     | -1.37579 | 3.979242 | -3.70444 | 0.010969 | 0.073125 | -3.09949 |
| GOLGA6D   | 1.417257 | 2.603566 | 3.697352 | 0.011059 | 0.073365 | -3.10838 |
| THBS2     | 1.924714 | 3.26266  | 3.697158 | 0.011061 | 0.073365 | -3.10862 |
| FAM47A    | 1.751801 | 2.865846 | 3.696373 | 0.011071 | 0.073375 | -3.1096  |
| LHX2      | 1.407246 | 2.455612 | 3.690036 | 0.011152 | 0.073575 | -3.11756 |
| EFS       | 1.104827 | 2.404957 | 3.689235 | 0.011162 | 0.073575 | -3.11857 |
| VWC2      | -1.20152 | 2.331055 | -3.68481 | 0.011219 | 0.073741 | -3.12413 |
| CCDC129   | 1.779413 | 2.652913 | 3.680937 | 0.011269 | 0.073974 | -3.129   |
| OOSP4A    | 1.280639 | 2.828606 | 3.672525 | 0.011378 | 0.074477 | -3.13958 |
| DEFA3     | -1.65026 | 6.828437 | -3.66868 | 0.011428 | 0.074553 | -3.14441 |
| MRGPRX1   | 1.08222  | 2.865758 | 3.659048 | 0.011556 | 0.074813 | -3.15655 |
| ITGA8     | 1.69706  | 2.014142 | 3.656944 | 0.011584 | 0.074842 | -3.15921 |
| F5        | -1.01843 | 3.145749 | -3.64828 | 0.0117   | 0.075118 | -3.17014 |
| CR1       | 1.479736 | 2.280083 | 3.645765 | 0.011734 | 0.075288 | -3.17331 |
| HDAC7     | 1.378387 | 2.257055 | 3.632269 | 0.011918 | 0.07598  | -3.19037 |
| NOXO1     | 1.191986 | 2.914465 | 3.628513 | 0.01197  | 0.076063 | -3.19512 |
| HHLA2     | 1.02865  | 2.47993  | 3.614547 | 0.012165 | 0.076824 | -3.2128  |
| PCDHA13   | 1.941255 | 2.806946 | 3.605431 | 0.012294 | 0.077234 | -3.22436 |
| GPR111    | -1.28114 | 2.52862  | -3.57716 | 0.012704 | 0.078915 | -3.26028 |
| RGS7      | 1.511565 | 2.90237  | 3.572915 | 0.012767 | 0.079042 | -3.26568 |
| MAGEL2    | 1.014129 | 3.187998 | 3.568788 | 0.012828 | 0.079231 | -3.27094 |
| LOC339862 | 1.051045 | 4.86095  | 3.56533  | 0.01288  | 0.079368 | -3.27534 |
| TDRD15    | -1.20501 | 1.808839 | -3.56366 | 0.012905 | 0.079418 | -3.27748 |
| PRSS56    | 1.364951 | 6.530314 | 3.560721 | 0.012949 | 0.07959  | -3.28122 |
| DGKB      | -1.35176 | 2.666365 | -3.54045 | 0.01326  | 0.080617 | -3.3071  |
| L3MBTL4   | 1.007728 | 4.350171 | 3.533148 | 0.013373 | 0.08084  | -3.31643 |
| SERTM1    | 1.116398 | 3.445707 | 3.521731 | 0.013553 | 0.081429 | -3.33104 |
| CCL1      | -1.68328 | 2.779385 | -3.51883 | 0.013599 | 0.081558 | -3.33475 |
| MINAR1    | 1.087536 | 4.4554   | 3.506811 | 0.013793 | 0.082233 | -3.35016 |
| EFCAB6    | -1.05777 | 6.99687  | -3.49562 | 0.013975 | 0.082887 | -3.36453 |
| SNAP25    | 1.007199 | 3.925411 | 3.486094 | 0.014133 | 0.083353 | -3.37677 |
| VAV3      | 1.377066 | 4.402281 | 3.483466 | 0.014177 | 0.083452 | -3.38015 |
| KLK12     | -1.08799 | 1.988407 | -3.4759  | 0.014303 | 0.083982 | -3.38988 |
| PDZRN3    | -1.25824 | 2.19284  | -3.46594 | 0.014473 | 0.084448 | -3.40271 |
| LY6H      | 1.413918 | 2.224482 | 3.45564  | 0.01465  | 0.085141 | -3.41599 |
| SPATA22   | 1.017969 | 1.912804 | 3.384489 | 0.015942 | 0.089448 | -3.50813 |
| CNR1      | -1.51184 | 3.829947 | -3.37482 | 0.016127 | 0.090061 | -3.52071 |
| DEFB106B  | -1.42034 | 3.253984 | -3.35497 | 0.016514 | 0.091255 | -3.54657 |
| TF        | 1.084925 | 4.148222 | 3.344379 | 0.016725 | 0.091773 | -3.56038 |
| APOBEC2   | -1.13449 | 3.497465 | -3.33796 | 0.016855 | 0.092189 | -3.56877 |

|               |          |          |          |          |          |          |
|---------------|----------|----------|----------|----------|----------|----------|
| LY6G6F-LY6G6D | 1.447186 | 4.143687 | 3.33703  | 0.016873 | 0.092235 | -3.56998 |
| ACKR1         | -1.82294 | 2.35164  | -3.32821 | 0.017053 | 0.092693 | -3.5815  |
| THEMIS        | 1.211366 | 4.753116 | 3.326832 | 0.017081 | 0.09272  | -3.58331 |
| GPR174        | 1.287567 | 1.73903  | 3.326534 | 0.017088 | 0.09272  | -3.5837  |
| GUCY1A1       | -1.00366 | 2.588266 | -3.29478 | 0.017754 | 0.094752 | -3.62529 |
| FCGR1B        | -1.33839 | 2.072978 | -3.29352 | 0.017781 | 0.094791 | -3.62695 |
| TRBV5-1       | -1.6664  | 3.117935 | -3.28763 | 0.017908 | 0.095251 | -3.63468 |
| CSPG5         | -1.16041 | 7.182818 | -3.28622 | 0.017938 | 0.09529  | -3.63654 |
| AC244517.10   | -1.1487  | 2.290509 | -3.28133 | 0.018045 | 0.095656 | -3.64296 |
| NKX2-8        | -1.12807 | 2.143611 | -3.26181 | 0.018476 | 0.09708  | -3.66862 |
| RGS9          | 1.698411 | 2.844175 | 3.261461 | 0.018484 | 0.09708  | -3.66909 |
| LRRC31        | -1.05524 | 6.86625  | -3.25997 | 0.018518 | 0.097138 | -3.67105 |
| SCGB1D2       | 1.343278 | 1.764332 | 3.243315 | 0.018896 | 0.098232 | -3.693   |
| SOX9          | 1.082911 | 3.723847 | 3.232233 | 0.019152 | 0.099085 | -3.70762 |
| GJD2          | -1.10195 | 2.574921 | -3.22792 | 0.019253 | 0.099387 | -3.71332 |
| TP53TG5       | 1.445694 | 3.242623 | 3.223364 | 0.01936  | 0.099734 | -3.71933 |
| ASPRV1        | 1.192306 | 2.870557 | 3.204985 | 0.019799 | 0.101022 | -3.74364 |
| PTH1R         | 1.126331 | 1.987643 | 3.204829 | 0.019802 | 0.101022 | -3.74385 |
| LRRC37A       | -1.29036 | 2.854109 | -3.19891 | 0.019946 | 0.101413 | -3.75169 |
| AGTR1         | -1.08262 | 2.996449 | -3.19254 | 0.020102 | 0.101915 | -3.76013 |
| SMIM2         | -1.05542 | 3.176872 | -3.1911  | 0.020138 | 0.101946 | -3.76204 |
| CLCA1         | 1.797718 | 3.087365 | 3.169277 | 0.020683 | 0.103374 | -3.79099 |
| SYNGR3        | 1.087918 | 5.745233 | 3.156024 | 0.021022 | 0.104294 | -3.8086  |
| ARRDC5        | 1.27084  | 3.021047 | 3.151931 | 0.021128 | 0.104481 | -3.81405 |
| LRRC39        | 1.310773 | 1.906925 | 3.14878  | 0.02121  | 0.10473  | -3.81824 |
| HEY1          | -1.20439 | 3.259526 | -3.14155 | 0.0214   | 0.105163 | -3.82787 |
| OR5B21        | 1.716095 | 3.205539 | 3.132428 | 0.021641 | 0.105791 | -3.84001 |
| OR3A3         | 1.378466 | 1.939145 | 3.12481  | 0.021845 | 0.106168 | -3.85017 |
| FAM65C        | 1.086068 | 3.76691  | 3.121584 | 0.021932 | 0.106271 | -3.85447 |
| TMPRSS2       | 1.073366 | 2.879391 | 3.12017  | 0.021971 | 0.106313 | -3.85636 |
| KRT1          | 1.41698  | 2.580433 | 3.118671 | 0.022011 | 0.106427 | -3.85836 |
| CEACAM16      | 1.517645 | 2.312869 | 3.117439 | 0.022045 | 0.106538 | -3.86    |
| KRTAP4-8      | 1.027677 | 2.491646 | 3.112383 | 0.022183 | 0.106991 | -3.86675 |
| GPR128        | 1.325455 | 2.589273 | 3.098109 | 0.022578 | 0.107899 | -3.88582 |
| GNG3          | 1.5101   | 2.791091 | 3.083985 | 0.022976 | 0.108803 | -3.90471 |
| TEX26         | 2.026128 | 2.966163 | 3.083452 | 0.022991 | 0.108818 | -3.90543 |
| CPED1         | 1.207986 | 3.642752 | 3.074758 | 0.02324  | 0.109472 | -3.91707 |
| DCDC2B        | 1.328294 | 2.714885 | 3.060049 | 0.023669 | 0.110573 | -3.93678 |
| SLCO2A1       | -1.2967  | 2.127648 | -3.05581 | 0.023794 | 0.111056 | -3.94247 |
| LDLRAD2       | 1.689942 | 3.294928 | 3.04413  | 0.024142 | 0.111861 | -3.95815 |
| OR6C4         | -1.09317 | 2.555402 | -3.02933 | 0.024591 | 0.11328  | -3.97804 |
| CD3EAP        | 1.018365 | 5.235436 | 3.028283 | 0.024624 | 0.113307 | -3.97945 |
| SEMA7A        | 1.021053 | 4.448354 | 3.019612 | 0.024892 | 0.114174 | -3.99111 |
| SYT10         | -1.16822 | 2.625229 | -3.01366 | 0.025077 | 0.114744 | -3.99913 |
| AADA4L4       | -1.04601 | 2.583594 | -2.99953 | 0.025525 | 0.11606  | -4.01817 |
| NEUROD1       | 1.013778 | 1.886734 | 2.987763 | 0.025903 | 0.117083 | -4.03403 |
| CD38          | 1.051495 | 3.845088 | 2.985488 | 0.025977 | 0.117288 | -4.0371  |

|            |          |          |          |          |          |          |
|------------|----------|----------|----------|----------|----------|----------|
| GCKR       | 1.677312 | 2.574189 | 2.977007 | 0.026255 | 0.118026 | -4.04855 |
| OCM2       | 1.192586 | 3.890854 | 2.976977 | 0.026256 | 0.118026 | -4.04859 |
| GUCY1A2    | -1.37348 | 2.58819  | -2.97571 | 0.026298 | 0.118162 | -4.0503  |
| AL160272.2 | 1.277684 | 2.468995 | 2.969169 | 0.026515 | 0.118641 | -4.05913 |
| AC024592.3 | -1.20353 | 2.30524  | -2.96549 | 0.026638 | 0.119078 | -4.06411 |
| SH2D1B     | 1.118455 | 3.656434 | 2.961086 | 0.026786 | 0.119466 | -4.07006 |
| THEGL      | 1.616732 | 3.529875 | 2.959247 | 0.026848 | 0.119615 | -4.07255 |
| ADAP1      | -1.1544  | 3.135471 | -2.95498 | 0.026992 | 0.119912 | -4.07832 |
| TRBV7-9    | 1.201581 | 1.77905  | 2.954973 | 0.026992 | 0.119912 | -4.07833 |
| ZIM3       | 1.146954 | 4.258519 | 2.945947 | 0.027301 | 0.120759 | -4.09054 |
| NEU4       | -1.29145 | 2.590552 | -2.93836 | 0.027563 | 0.121366 | -4.10081 |
| AL357673.1 | 1.366364 | 1.731065 | 2.930868 | 0.027825 | 0.122151 | -4.11096 |
| AFF2       | 1.246102 | 2.537998 | 2.930618 | 0.027833 | 0.122163 | -4.1113  |
| CXorf51B   | 1.020596 | 2.266857 | 2.925445 | 0.028016 | 0.122595 | -4.11832 |
| ECE2       | 1.039711 | 2.845398 | 2.921027 | 0.028172 | 0.12277  | -4.12431 |
| TRAPPC3L   | -1.24015 | 2.76437  | -2.92049 | 0.028191 | 0.122779 | -4.12503 |
| TRBV7-6    | 1.528251 | 2.45841  | 2.919213 | 0.028237 | 0.12281  | -4.12677 |
| KRTAP9-6   | -1.37772 | 2.765243 | -2.90594 | 0.028715 | 0.124063 | -4.14478 |
| OR4K17     | 1.086945 | 3.932203 | 2.903556 | 0.028802 | 0.124232 | -4.14801 |
| ZSCAN4     | -1.01773 | 2.239591 | -2.88504 | 0.029485 | 0.126034 | -4.17318 |
| LOR        | 1.648667 | 2.707655 | 2.88135  | 0.029623 | 0.126335 | -4.17819 |
| ATP13A4    | 1.067329 | 1.60826  | 2.875332 | 0.029851 | 0.126887 | -4.18638 |
| AKR1C4     | 1.729299 | 2.437934 | 2.872607 | 0.029954 | 0.127003 | -4.19009 |
| FNDC8      | 1.003763 | 2.950788 | 2.869526 | 0.030071 | 0.127283 | -4.19428 |
| MORN5      | 1.822396 | 2.516568 | 2.847062 | 0.030943 | 0.129519 | -4.22488 |
| KRT25      | 1.105831 | 3.571882 | 2.844692 | 0.031037 | 0.129739 | -4.22811 |
| MYO7A      | 1.31967  | 2.11122  | 2.834476 | 0.031443 | 0.130678 | -4.24205 |
| ACSM2A     | -1.03013 | 2.481607 | -2.82663 | 0.03176  | 0.131632 | -4.25276 |
| SLC22A3    | 1.465552 | 1.807523 | 2.819352 | 0.032056 | 0.132324 | -4.26269 |
| KRT5       | -1.00104 | 1.873212 | -2.81766 | 0.032126 | 0.132505 | -4.26501 |
| AL445989.1 | 1.529674 | 3.501813 | 2.814249 | 0.032266 | 0.132688 | -4.26966 |
| CASP14     | 1.380622 | 2.350278 | 2.808575 | 0.032501 | 0.133048 | -4.27742 |
| DPPA5      | 1.306016 | 2.885827 | 2.80763  | 0.03254  | 0.133167 | -4.27871 |
| ANO1       | 1.035753 | 3.279485 | 2.806218 | 0.032599 | 0.133274 | -4.28064 |
| ANKRD31    | 1.340384 | 2.047922 | 2.79808  | 0.03294  | 0.134072 | -4.29176 |
| NHLH2      | 1.284222 | 5.453854 | 2.794455 | 0.033093 | 0.134543 | -4.29672 |
| OR51A4     | 1.492088 | 2.625924 | 2.791338 | 0.033226 | 0.134867 | -4.30099 |
| PAQR9      | 1.055518 | 3.527935 | 2.779694 | 0.033725 | 0.136087 | -4.31692 |
| PPEF1      | -1.09993 | 8.983387 | -2.77002 | 0.034147 | 0.137294 | -4.33017 |
| AMELX      | -1.34955 | 1.677174 | -2.75723 | 0.034712 | 0.138511 | -4.34769 |
| ADGRB3     | 1.036057 | 2.677942 | 2.747592 | 0.035146 | 0.139619 | -4.36091 |
| ANTXR1     | -1.12517 | 2.073088 | -2.73632 | 0.03566  | 0.140889 | -4.37638 |
| PRDM8      | 1.453396 | 2.211727 | 2.73154  | 0.03588  | 0.141494 | -4.38294 |
| OR7A17     | -1.04127 | 2.836594 | -2.72432 | 0.036216 | 0.142262 | -4.39286 |
| PDCL2      | 1.14663  | 3.074706 | 2.715963 | 0.036608 | 0.143126 | -4.40433 |
| PLPPR1     | 1.563725 | 2.715584 | 2.706394 | 0.037063 | 0.144099 | -4.41748 |
| SPATA1     | -1.24808 | 2.309773 | -2.70554 | 0.037104 | 0.14419  | -4.41865 |
| WNT7A      | 1.022307 | 9.70113  | 2.69915  | 0.037412 | 0.144922 | -4.42744 |

|              |          |          |          |          |          |          |
|--------------|----------|----------|----------|----------|----------|----------|
| TRAT1        | -1.00035 | 3.023334 | -2.68774 | 0.037969 | 0.146065 | -4.44315 |
| NPS          | -1.15026 | 3.152184 | -2.67541 | 0.03858  | 0.147611 | -4.46011 |
| OR5B12       | -1.02859 | 2.38071  | -2.67025 | 0.038839 | 0.148188 | -4.46722 |
| DPP6         | 1.479569 | 3.263787 | 2.66834  | 0.038936 | 0.148306 | -4.46984 |
| IDO2         | -1.40625 | 2.632861 | -2.66782 | 0.038962 | 0.148378 | -4.47056 |
| PRR18        | 1.166754 | 3.611996 | 2.651266 | 0.039808 | 0.150454 | -4.49337 |
| MAGEB1       | -1.23831 | 2.236914 | -2.64506 | 0.040131 | 0.1513   | -4.50192 |
| CDH17        | 1.009094 | 3.316592 | 2.639513 | 0.040421 | 0.151985 | -4.50957 |
| APOBEC3A     | -1.34876 | 2.245473 | -2.63594 | 0.04061  | 0.152414 | -4.5145  |
| OR2H2        | -1.29898 | 3.719853 | -2.62622 | 0.041127 | 0.153772 | -4.52791 |
| MTLN         | -1.34746 | 3.239562 | -2.62122 | 0.041396 | 0.15426  | -4.53481 |
| HECW1        | 1.224044 | 2.746589 | 2.608119 | 0.042109 | 0.155783 | -4.55289 |
| PRAMEF4      | 1.409215 | 1.812943 | 2.60681  | 0.042181 | 0.155852 | -4.5547  |
| TRGV1        | 1.318542 | 3.378988 | 2.601052 | 0.042499 | 0.156435 | -4.56265 |
| PARD6B       | -1.25177 | 2.333672 | -2.59942 | 0.04259  | 0.156607 | -4.56491 |
| WFDC5        | 1.241666 | 4.995598 | 2.57452  | 0.043999 | 0.15976  | -4.59932 |
| RNF182       | 1.138989 | 3.302759 | 2.572239 | 0.044131 | 0.159994 | -4.60247 |
| OR10AD1      | 1.388503 | 3.586856 | 2.567895 | 0.044383 | 0.160509 | -4.60847 |
| CFAP44       | 1.023054 | 3.509591 | 2.554976 | 0.045141 | 0.161888 | -4.62634 |
| NOX5         | 1.244589 | 2.172695 | 2.553047 | 0.045255 | 0.162087 | -4.62901 |
| HRC          | 1.184839 | 2.803556 | 2.539795 | 0.046049 | 0.163585 | -4.64735 |
| AIF1         | -1.20557 | 2.642063 | -2.53782 | 0.046168 | 0.163782 | -4.65008 |
| IFNA5        | 1.098618 | 1.67862  | 2.52128  | 0.047183 | 0.166057 | -4.67298 |
| TBX2         | 1.111204 | 2.42698  | 2.511282 | 0.047808 | 0.167177 | -4.68683 |
| CFC1         | 1.476027 | 3.13634  | 2.510715 | 0.047843 | 0.167231 | -4.68761 |
| LOC100144595 | 1.130165 | 2.021045 | 2.50877  | 0.047966 | 0.16734  | -4.6903  |
| CALR3        | 1.225055 | 2.956538 | 2.485261 | 0.049475 | 0.170892 | -4.72288 |

Table S2 significant different expression of mRNA after glucose deprivation compared to controls.

| Gene     | logFC    | AveExpr  | t        | P.Value  | adj.P.Val | B        |
|----------|----------|----------|----------|----------|-----------|----------|
| MSMO1    | 1.500312 | 11.2172  | 22.64719 | 1.06E-06 | 0.007561  | 5.795352 |
| TM7SF2   | 1.958381 | 9.365773 | 22.56162 | 1.09E-06 | 0.007561  | 5.782969 |
| CXCL13   | 1.533383 | 1.837828 | 21.60967 | 1.38E-06 | 0.007561  | 5.638787 |
| COLQ     | 1.940565 | 3.80136  | 20.15751 | 2.02E-06 | 0.007561  | 5.39393  |
| SH2D5    | 1.540058 | 9.756061 | 20.05252 | 2.08E-06 | 0.007561  | 5.374949 |
| OVOL3    | -1.78532 | 1.966555 | -19.8234 | 2.22E-06 | 0.007561  | 5.332882 |
| LDLR     | 1.221553 | 9.149798 | 18.09624 | 3.66E-06 | 0.00887   | 4.9852   |
| ZNF716   | 1.753492 | 1.972153 | 17.91279 | 3.87E-06 | 0.00887   | 4.944821 |
| LOC79999 | 1.193893 | 8.2778   | 17.85975 | 3.93E-06 | 0.00887   | 4.933013 |
| ACAT2    | 1.365095 | 13.70753 | 17.5461  | 4.33E-06 | 0.00887   | 4.861943 |
| C14orf1  | 1.080791 | 12.29567 | 16.73289 | 5.62E-06 | 0.009874  | 4.667251 |
| PNPLA3   | 1.532699 | 7.662876 | 16.64319 | 5.79E-06 | 0.009874  | 4.644809 |
| FOXS1    | 1.269488 | 8.92906  | 16.3661  | 6.35E-06 | 0.009992  | 4.574207 |
| FABP3    | 2.957048 | 5.777199 | 16.08341 | 6.98E-06 | 0.010206  | 4.500136 |
| FAM13A   | -1.03544 | 5.579762 | -14.8707 | 1.07E-05 | 0.012893  | 4.157219 |
| OR10Z1   | 1.120577 | 1.762389 | 14.86232 | 1.07E-05 | 0.012893  | 4.154684 |
| CDC25A   | -1.02438 | 7.320389 | -14.7988 | 1.10E-05 | 0.012893  | 4.135515 |
| RAB3IL1  | 1.021764 | 10.80767 | 14.49328 | 1.23E-05 | 0.012893  | 4.041448 |
| CYP51A1  | 1.213513 | 10.9615  | 13.8541  | 1.58E-05 | 0.012893  | 3.834647 |
| SC5D     | 1.05157  | 12.04741 | 13.776   | 1.62E-05 | 0.012893  | 3.808402 |
| S100A7L2 | 1.403502 | 1.777465 | 13.72149 | 1.66E-05 | 0.012893  | 3.789955 |
| INSIG1   | 1.643854 | 11.58264 | 13.70787 | 1.67E-05 | 0.012893  | 3.785329 |
| SCD      | 1.349115 | 10.56101 | 13.56062 | 1.77E-05 | 0.012893  | 3.734885 |
| TCF4     | -1.06755 | 5.592805 | -13.4796 | 1.83E-05 | 0.012893  | 3.706799 |
| SQLE     | 1.254082 | 12.99613 | 13.30913 | 1.96E-05 | 0.012893  | 3.64686  |
| DOK2     | 2.095897 | 6.074794 | 13.11231 | 2.12E-05 | 0.012893  | 3.57628  |
| OR8J3    | 1.20235  | 8.872562 | 13.09255 | 2.14E-05 | 0.012893  | 3.569109 |
| ZNF681   | -1.19584 | 3.735101 | -12.9796 | 2.24E-05 | 0.012893  | 3.527824 |
| CA2      | -1.20278 | 7.012551 | -12.9768 | 2.25E-05 | 0.012893  | 3.526805 |
| NPTX1    | 1.472324 | 4.697856 | 12.8416  | 2.38E-05 | 0.012893  | 3.476695 |
| MKI67    | -1.00276 | 8.232993 | -12.7432 | 2.48E-05 | 0.012893  | 3.439777 |
| MIER2    | -1.04623 | 5.385262 | -12.6541 | 2.57E-05 | 0.012893  | 3.405974 |
| MYCBP    | -1.05472 | 9.916922 | -12.6382 | 2.59E-05 | 0.012893  | 3.399883 |
| ANGPT1   | -1.92154 | 4.816365 | -12.6331 | 2.60E-05 | 0.012893  | 3.397954 |
| MUC12    | -1.25932 | 1.815232 | -12.6027 | 2.63E-05 | 0.012893  | 3.386313 |
| FAM71E1  | 1.236813 | 8.602949 | 12.53536 | 2.71E-05 | 0.012893  | 3.360409 |
| SREBF2   | 1.045902 | 9.025359 | 12.37083 | 2.91E-05 | 0.013007  | 3.296291 |
| AGMO     | -1.31977 | 7.708661 | -12.273  | 3.04E-05 | 0.013007  | 3.257587 |
| MEST     | -1.40808 | 9.197336 | -12.1875 | 3.15E-05 | 0.013099  | 3.223426 |

|            |          |          |          |          |          |          |
|------------|----------|----------|----------|----------|----------|----------|
| FRMPD4     | 2.865152 | 5.972819 | 12.15438 | 3.20E-05 | 0.013099 | 3.210124 |
| ITK        | 1.656963 | 2.08287  | 11.86933 | 3.64E-05 | 0.013361 | 3.093401 |
| FAM95C     | -1.42079 | 5.439155 | -11.8041 | 3.75E-05 | 0.013361 | 3.066174 |
| PSG8       | 1.201253 | 8.866507 | 11.76472 | 3.82E-05 | 0.013361 | 3.049614 |
| NEB        | -1.0371  | 7.0734   | -11.5222 | 4.27E-05 | 0.014085 | 2.946093 |
| DHRS2      | -1.30756 | 7.788302 | -11.412  | 4.49E-05 | 0.01431  | 2.898076 |
| LRRC37A    | -2.13679 | 2.430896 | -11.3842 | 4.55E-05 | 0.01431  | 2.885843 |
| OPLAH      | 1.238928 | 8.191673 | 11.35539 | 4.62E-05 | 0.01431  | 2.873166 |
| GRXCR1     | 1.504747 | 1.949711 | 10.87896 | 5.81E-05 | 0.0145   | 2.657015 |
| MGARP      | -1.12936 | 13.1057  | -10.8664 | 5.84E-05 | 0.0145   | 2.651153 |
| TNFSF10    | -1.03407 | 10.3584  | -10.8535 | 5.88E-05 | 0.0145   | 2.645144 |
| CEND1      | -1.44884 | 6.501167 | -10.8371 | 5.93E-05 | 0.0145   | 2.637455 |
| ACMSD      | 1.360449 | 3.066638 | 10.74402 | 6.21E-05 | 0.0145   | 2.593576 |
| FOLR3      | 1.045209 | 4.86394  | 10.69961 | 6.35E-05 | 0.0145   | 2.572476 |
| HAPLN1     | -1.42127 | 6.440694 | -10.6932 | 6.37E-05 | 0.0145   | 2.569437 |
| CIZ1       | -1.32473 | 6.644002 | -10.6693 | 6.45E-05 | 0.0145   | 2.55803  |
| PCDHAC1    | 1.015947 | 5.184958 | 10.66467 | 6.46E-05 | 0.0145   | 2.5558   |
| GGT6       | 1.021511 | 2.058234 | 10.624   | 6.59E-05 | 0.0145   | 2.536297 |
| TRBV12-3   | -1.03861 | 6.776751 | -10.5105 | 6.98E-05 | 0.0145   | 2.481359 |
| TUBA3E     | -1.9453  | 3.018279 | -10.4999 | 7.02E-05 | 0.0145   | 2.47621  |
| HLA-DPB1   | -1.39384 | 2.858151 | -10.4764 | 7.11E-05 | 0.0145   | 2.464726 |
| FAM111B    | -1.08702 | 8.459847 | -10.4722 | 7.12E-05 | 0.0145   | 2.462664 |
| MSH4       | -1.1607  | 1.658752 | -10.4658 | 7.14E-05 | 0.0145   | 2.45953  |
| PDIA4      | 1.067303 | 11.69869 | 10.36447 | 7.52E-05 | 0.014957 | 2.409616 |
| CCL23      | -1.41964 | 5.756797 | -10.3603 | 7.54E-05 | 0.014957 | 2.407547 |
| PLA2G3     | 1.220288 | 4.813873 | 10.28947 | 7.82E-05 | 0.014957 | 2.372272 |
| PRKG2      | 2.261763 | 3.224057 | 10.23323 | 8.05E-05 | 0.01513  | 2.344044 |
| HIST1H2BJ  | -1.03019 | 7.399531 | -10.2318 | 8.06E-05 | 0.01513  | 2.34331  |
| HES6       | 1.03718  | 10.55793 | 10.15465 | 8.39E-05 | 0.015397 | 2.304288 |
| CYP26B1    | -2.5751  | 4.909946 | -10.1463 | 8.43E-05 | 0.015397 | 2.30004  |
| ERVFRD-1   | 1.38043  | 1.851    | 10.10131 | 8.63E-05 | 0.015402 | 2.277089 |
| E2F2       | -1.29525 | 6.068074 | -10.0349 | 8.94E-05 | 0.015402 | 2.242992 |
| GDF3       | -1.63252 | 6.977092 | -9.86961 | 9.76E-05 | 0.015802 | 2.156862 |
| GJB4       | 1.514916 | 7.596674 | 9.847054 | 9.88E-05 | 0.015802 | 2.144977 |
| PPIAL4G    | 1.698013 | 2.468838 | 9.846687 | 9.88E-05 | 0.015802 | 2.144783 |
| AL031777.3 | -1.00278 | 5.720321 | -9.8054  | 0.000101 | 0.015802 | 2.122943 |
| ART4       | -1.07006 | 6.651188 | -9.75833 | 0.000104 | 0.016031 | 2.097904 |
| INA        | -1.31837 | 4.002492 | -9.73528 | 0.000105 | 0.016031 | 2.085591 |
| TMEM100    | -1.5642  | 4.342728 | -9.69067 | 0.000108 | 0.016184 | 2.061666 |
| C12orf45   | -1.11599 | 4.975613 | -9.65285 | 0.00011  | 0.016284 | 2.041277 |
| DMBX1      | 1.286248 | 4.245658 | 9.506795 | 0.000119 | 0.016954 | 1.961638 |
| HIST1H3H   | -1.06479 | 7.440963 | -9.48141 | 0.000121 | 0.016954 | 1.947648 |
| DEPDC1     | -1.14716 | 8.167862 | -9.43458 | 0.000124 | 0.016954 | 1.921729 |
| GFI1       | 1.45374  | 2.942064 | 9.404204 | 0.000126 | 0.016954 | 1.904834 |
| UBE2S      | -1.05886 | 5.961223 | -9.3691  | 0.000129 | 0.016954 | 1.885228 |
| NR6A1      | -2.07761 | 2.147821 | -9.15799 | 0.000145 | 0.017235 | 1.765512 |
| CRELD2     | 1.032569 | 14.48918 | 9.131897 | 0.000147 | 0.017235 | 1.750492 |
| ELMOD1     | -1.11452 | 7.374577 | -9.1223  | 0.000148 | 0.017235 | 1.744958 |

|            |          |          |          |          |          |          |
|------------|----------|----------|----------|----------|----------|----------|
| LIPJ       | 1.104336 | 4.590389 | 9.114006 | 0.000149 | 0.017235 | 1.740166 |
| PRSS56     | 1.609275 | 6.652476 | 9.093573 | 0.000151 | 0.017235 | 1.728345 |
| MEN1       | 1.430641 | 2.117261 | 9.086637 | 0.000151 | 0.017235 | 1.724325 |
| CLEC9A     | 1.384302 | 5.95251  | 9.08217  | 0.000152 | 0.017235 | 1.721734 |
| LSS        | 1.219223 | 6.785687 | 9.071544 | 0.000152 | 0.017235 | 1.715566 |
| MUC13      | 1.259823 | 4.116511 | 8.93999  | 0.000165 | 0.017781 | 1.638508 |
| LPL        | 1.077109 | 3.991337 | 8.845562 | 0.000174 | 0.018173 | 1.582401 |
| SLC7A9     | 1.128771 | 3.979675 | 8.727394 | 0.000187 | 0.018442 | 1.511231 |
| LRIT2      | 1.02883  | 4.935004 | 8.708621 | 0.000189 | 0.018442 | 1.499826 |
| PCSK9      | 1.172407 | 6.906464 | 8.697167 | 0.00019  | 0.018442 | 1.492854 |
| SMIM33     | 1.376811 | 6.416385 | 8.692639 | 0.000191 | 0.018442 | 1.490094 |
| GOLGA6L22  | 1.086812 | 1.569317 | 8.681437 | 0.000192 | 0.018442 | 1.483261 |
| HSP90B1    | 1.291304 | 13.18505 | 8.662209 | 0.000194 | 0.018442 | 1.47151  |
| GEM        | 1.027936 | 6.784498 | 8.637358 | 0.000197 | 0.018442 | 1.456279 |
| PTN        | 1.167287 | 5.534211 | 8.622881 | 0.000199 | 0.018442 | 1.447384 |
| ANKRD33    | 1.503376 | 7.806753 | 8.595116 | 0.000202 | 0.018485 | 1.430278 |
| NKX2-2     | -1.76019 | 1.946905 | -8.58206 | 0.000204 | 0.018549 | 1.422215 |
| TDGF1      | 1.739899 | 6.502429 | 8.539118 | 0.000209 | 0.01871  | 1.395591 |
| OPRPN      | 1.837417 | 1.997983 | 8.468972 | 0.000219 | 0.018946 | 1.351785 |
| HIST1H2BA  | -1.32335 | 5.186152 | -8.45488 | 0.000221 | 0.018946 | 1.34294  |
| OCM2       | 1.382195 | 3.985659 | 8.446535 | 0.000222 | 0.018946 | 1.33769  |
| TUBA4A     | -1.07667 | 13.46887 | -8.4284  | 0.000224 | 0.018946 | 1.326264 |
| WDR72      | -1.56088 | 2.322154 | -8.40098 | 0.000228 | 0.01901  | 1.308942 |
| KIR2DS3    | 1.775916 | 2.165726 | 8.382809 | 0.000231 | 0.019049 | 1.297431 |
| TNFSF14    | 1.652665 | 4.26384  | 8.353845 | 0.000235 | 0.019049 | 1.279023 |
| HAND2      | 1.58167  | 5.81369  | 8.351542 | 0.000235 | 0.019049 | 1.277556 |
| CBLN2      | 1.062352 | 4.918391 | 8.342995 | 0.000236 | 0.019049 | 1.272109 |
| AC020909.1 | 1.073449 | 8.192611 | 8.313782 | 0.000241 | 0.019049 | 1.253446 |
| KIF5A      | -1.17482 | 5.118321 | -8.30893 | 0.000241 | 0.019049 | 1.25034  |
| ATP6V1G3   | -2.37898 | 3.198717 | -8.29239 | 0.000244 | 0.019049 | 1.239733 |
| VIT        | -1.26501 | 5.568967 | -8.2836  | 0.000245 | 0.019049 | 1.234089 |
| DGCR14     | -1.06206 | 8.235687 | -8.2794  | 0.000246 | 0.019049 | 1.23139  |
| SCYGR4     | 1.267035 | 2.36677  | 8.249455 | 0.000251 | 0.019049 | 1.212099 |
| SLIT1      | 1.354469 | 1.726839 | 8.2179   | 0.000256 | 0.019049 | 1.191689 |
| ALDH3B1    | 1.011051 | 7.37196  | 8.198342 | 0.000259 | 0.019049 | 1.178997 |
| TRAV8-3    | -1.03846 | 4.555173 | -8.1822  | 0.000262 | 0.019049 | 1.168498 |
| ZFP57      | 1.48473  | 1.981156 | 8.149149 | 0.000267 | 0.019248 | 1.146929 |
| PLEKHB1    | 1.32652  | 4.534623 | 8.115253 | 0.000273 | 0.019601 | 1.124711 |
| IGFALS     | 1.02027  | 6.147737 | 8.024357 | 0.000289 | 0.019874 | 1.064643 |
| OR7G1      | 1.357361 | 4.420782 | 7.954354 | 0.000303 | 0.019977 | 1.017889 |
| SEMG2      | 2.128874 | 3.649279 | 7.947938 | 0.000304 | 0.019977 | 1.013582 |
| C12orf56   | -1.35901 | 3.021654 | -7.92698 | 0.000308 | 0.020157 | 0.999491 |
| RASSF10    | 1.146699 | 4.433793 | 7.905022 | 0.000313 | 0.02028  | 0.98468  |
| TXNIP      | -2.919   | 7.464884 | -7.86601 | 0.000321 | 0.02028  | 0.958264 |
| ARX        | 1.485272 | 4.568402 | 7.856466 | 0.000323 | 0.02028  | 0.95178  |
| CCDC150    | -1.00641 | 5.759936 | -7.85097 | 0.000324 | 0.02028  | 0.948044 |
| ST6GALNAC1 | -1.68287 | 2.248102 | -7.83732 | 0.000327 | 0.020381 | 0.938752 |
| CT45A3     | -1.16505 | 3.422446 | -7.82934 | 0.000329 | 0.020381 | 0.933306 |

|                   |          |          |          |          |          |          |
|-------------------|----------|----------|----------|----------|----------|----------|
| MANBAL            | -2.05263 | 2.814282 | -7.72306 | 0.000353 | 0.020863 | 0.860286 |
| LSP1              | 1.15901  | 3.198201 | 7.702973 | 0.000358 | 0.020905 | 0.846371 |
| C1orf185          | 1.38723  | 2.094855 | 7.693996 | 0.00036  | 0.02091  | 0.84014  |
| ZNF273            | -1.02897 | 5.846768 | -7.6636  | 0.000367 | 0.021067 | 0.818983 |
| OGA               | -1.07021 | 9.965848 | -7.59615 | 0.000384 | 0.021137 | 0.771724 |
| OTOL1             | 1.811671 | 4.463898 | 7.590872 | 0.000386 | 0.021137 | 0.768009 |
| TRAV13-2          | -1.06302 | 6.640527 | -7.56782 | 0.000392 | 0.021341 | 0.751752 |
| TENT5A            | -1.19039 | 4.564198 | -7.56413 | 0.000393 | 0.021341 | 0.749141 |
| SCN3A             | 2.100489 | 3.027808 | 7.538984 | 0.000399 | 0.02143  | 0.731337 |
| FOXA1             | -1.42382 | 6.868144 | -7.52214 | 0.000404 | 0.02143  | 0.71938  |
| C2orf57           | 1.873422 | 3.550495 | 7.498272 | 0.000411 | 0.021603 | 0.702383 |
| DARS2             | -1.6272  | 3.078743 | -7.4867  | 0.000414 | 0.021672 | 0.694124 |
| TMEFF2            | -1.42821 | 1.992358 | -7.46399 | 0.00042  | 0.021672 | 0.67788  |
| NDUFC2            | -1.18341 | 7.260462 | -7.44561 | 0.000426 | 0.021729 | 0.664694 |
| LAMB3             | 1.028755 | 12.0536  | 7.428531 | 0.000431 | 0.021823 | 0.652413 |
| CBX2              | 1.250509 | 9.250549 | 7.353628 | 0.000454 | 0.022249 | 0.598217 |
| SIM2              | 1.880944 | 1.965379 | 7.258708 | 0.000485 | 0.022846 | 0.52874  |
| KCNV1             | 1.221532 | 4.477781 | 7.249632 | 0.000488 | 0.022907 | 0.52205  |
| HIST1H4E          | -1.06317 | 6.078679 | -7.22606 | 0.000496 | 0.022934 | 0.504636 |
| SESN3             | -1.04869 | 5.119635 | -7.19099 | 0.000509 | 0.022934 | 0.478623 |
| KRT73             | -1.20887 | 5.856575 | -7.14448 | 0.000526 | 0.023117 | 0.443927 |
| WNT7A             | 1.090081 | 9.735016 | 7.121693 | 0.000534 | 0.023117 | 0.426851 |
| BIRC7             | 1.637962 | 8.829738 | 7.088805 | 0.000547 | 0.023183 | 0.402109 |
| ENO4              | 1.11817  | 2.190424 | 7.05945  | 0.000559 | 0.023314 | 0.379929 |
| LRCH1             | -1.01937 | 6.947052 | -7.0021  | 0.000583 | 0.023793 | 0.336339 |
| NMBR              | 1.435755 | 5.490867 | 6.983282 | 0.000591 | 0.023793 | 0.32196  |
| ELMO3             | -1.15539 | 2.735527 | -6.9615  | 0.0006   | 0.023793 | 0.305273 |
| FAM46A            | -1.18904 | 8.486865 | -6.93755 | 0.000611 | 0.023977 | 0.286858 |
| C4BPA             | 1.744836 | 1.935429 | 6.905861 | 0.000625 | 0.023977 | 0.26241  |
| SPINK4            | 1.635465 | 3.668708 | 6.904025 | 0.000626 | 0.023977 | 0.260991 |
| CEP57L1           | -1.21219 | 3.512478 | -6.8837  | 0.000635 | 0.024167 | 0.245249 |
| NHLH2             | 1.802925 | 5.713205 | 6.88314  | 0.000635 | 0.024167 | 0.244812 |
| LY6G6F-<br>LY6G6D | 2.070007 | 4.455097 | 6.878625 | 0.000638 | 0.024202 | 0.241309 |
| GPR18             | -2.22852 | 2.636136 | -6.82233 | 0.000665 | 0.024635 | 0.197437 |
| S100G             | 1.17906  | 1.709676 | 6.817464 | 0.000667 | 0.024643 | 0.193632 |
| FYB               | -1.33608 | 1.957872 | -6.8086  | 0.000671 | 0.024643 | 0.186691 |
| MT1G              | 1.253019 | 7.022501 | 6.796536 | 0.000677 | 0.024643 | 0.177225 |
| MEOX2             | -1.01112 | 9.590958 | -6.78456 | 0.000683 | 0.024643 | 0.167813 |
| SPANXN1           | 1.014608 | 4.364102 | 6.783614 | 0.000684 | 0.024643 | 0.167071 |
| TAS2R46           | -1.10412 | 4.158244 | -6.69796 | 0.000729 | 0.025023 | 0.0993   |
| OR4K1             | 1.315342 | 6.814435 | 6.628883 | 0.000768 | 0.025548 | 0.044047 |
| SPANXC            | -1.33331 | 4.723114 | -6.5529  | 0.000814 | 0.026066 | -0.01735 |
| KRTAP4-5          | 1.538199 | 5.801783 | 6.52966  | 0.000829 | 0.026111 | -0.03626 |
| MYCBPAP           | -1.59501 | 2.120034 | -6.52775 | 0.00083  | 0.026111 | -0.03781 |
| SQSTM1            | 1.0923   | 11.39134 | 6.483675 | 0.000858 | 0.026459 | -0.07386 |
| CDH22             | 1.255744 | 3.587426 | 6.462158 | 0.000873 | 0.026572 | -0.09153 |
| TRBV3-1           | 1.461649 | 4.147196 | 6.445746 | 0.000884 | 0.026759 | -0.10505 |



|            |          |          |          |          |          |          |
|------------|----------|----------|----------|----------|----------|----------|
| KRTAP9-4   | 1.055655 | 4.728573 | 6.391822 | 0.000922 | 0.027183 | -0.14969 |
| GDF11      | -1.18429 | 4.85805  | -6.38296 | 0.000928 | 0.027292 | -0.15705 |
| IFIT1      | -1.54573 | 9.746189 | -6.3505  | 0.000952 | 0.027342 | -0.18413 |
| TM4SF19    | 1.885402 | 5.723353 | 6.33432  | 0.000964 | 0.027342 | -0.19767 |
| TERB1      | 1.034021 | 4.555235 | 6.330297 | 0.000967 | 0.027342 | -0.20104 |
| DNAI1      | 1.086816 | 5.092061 | 6.314994 | 0.000979 | 0.027507 | -0.21388 |
| C19orf67   | -1.11512 | 2.637656 | -6.31228 | 0.000981 | 0.027507 | -0.21616 |
| NKX6-1     | 2.000653 | 2.1005   | 6.217581 | 0.001058 | 0.028502 | -0.29628 |
| L3MBTL4    | 1.594482 | 4.643548 | 6.189687 | 0.001082 | 0.028641 | -0.32009 |
| HIST1H4G   | -1.35663 | 2.889121 | -6.1375  | 0.001128 | 0.029191 | -0.36488 |
| GHRL       | -1.01265 | 4.853884 | -6.10182 | 0.001161 | 0.029574 | -0.3957  |
| BICDL1     | 1.361988 | 5.039916 | 6.099807 | 0.001163 | 0.029574 | -0.39744 |
| ITGAX      | 1.278735 | 3.695722 | 6.079776 | 0.001182 | 0.029766 | -0.41482 |
| LRRC69     | -1.2877  | 3.25919  | -6.07272 | 0.001189 | 0.029766 | -0.42095 |
| MOBP       | 1.251601 | 3.779729 | 6.05308  | 0.001208 | 0.02992  | -0.43805 |
| GPNMB      | 1.600258 | 2.310456 | 6.033257 | 0.001227 | 0.03028  | -0.45536 |
| AC026316.4 | -1.53629 | 2.378888 | -6.01014 | 0.001251 | 0.030464 | -0.47561 |
| NIN        | -1.27878 | 4.995236 | -6.00258 | 0.001259 | 0.030515 | -0.48224 |
| ELP4       | -1.29418 | 3.346572 | -5.97677 | 0.001286 | 0.030762 | -0.50495 |
| BHLHE23    | 1.014831 | 11.31349 | 5.94916  | 0.001315 | 0.031076 | -0.52934 |
| KRT25      | 1.148917 | 3.593425 | 5.944222 | 0.001321 | 0.0311   | -0.53372 |
| KLRG1      | -1.05198 | 7.408066 | -5.93121 | 0.001335 | 0.031216 | -0.54525 |
| PMIS2      | 1.123274 | 3.765795 | 5.928498 | 0.001338 | 0.031219 | -0.54766 |
| IGHV3-11   | 1.642468 | 3.912228 | 5.898621 | 0.001371 | 0.031531 | -0.57424 |
| SH3BP4     | -1.13672 | 4.854946 | -5.89482 | 0.001376 | 0.031534 | -0.57763 |
| HIST1H2AA  | -1.86985 | 2.572546 | -5.88738 | 0.001384 | 0.031598 | -0.58427 |
| CST4       | -1.69035 | 2.829214 | -5.82809 | 0.001455 | 0.032084 | -0.63743 |
| ORM2       | 1.279844 | 6.090749 | 5.8181   | 0.001467 | 0.032152 | -0.64644 |
| MFAP5      | 1.099764 | 2.858997 | 5.811302 | 0.001475 | 0.032187 | -0.65257 |
| IFI44L     | -2.08582 | 5.520065 | -5.80072 | 0.001488 | 0.032187 | -0.66214 |
| ZNF630     | 1.396398 | 3.517713 | 5.795435 | 0.001495 | 0.032187 | -0.66691 |
| GYPE       | 1.309488 | 4.348424 | 5.789258 | 0.001503 | 0.032187 | -0.67251 |
| NAP1L1     | -1.70331 | 3.695512 | -5.75032 | 0.001553 | 0.032827 | -0.70786 |
| PSG7       | 1.081409 | 5.427127 | 5.733519 | 0.001575 | 0.032944 | -0.72319 |
| FOXI2      | 2.377433 | 3.103749 | 5.731143 | 0.001579 | 0.032961 | -0.72536 |
| MEIS2      | -1.02807 | 5.107981 | -5.7265  | 0.001585 | 0.033057 | -0.7296  |
| PRAMEF4    | 1.023255 | 1.619963 | 5.707109 | 0.001611 | 0.033306 | -0.74734 |
| AL162596.1 | 1.177472 | 4.94177  | 5.66374  | 0.001672 | 0.033908 | -0.78721 |
| SLC22A1    | 1.012112 | 5.633874 | 5.65455  | 0.001685 | 0.034044 | -0.79569 |
| TAS2R19    | -1.21359 | 4.140012 | -5.64986 | 0.001692 | 0.034044 | -0.80003 |
| TRGV10     | 1.039721 | 5.492431 | 5.644933 | 0.001699 | 0.034073 | -0.80458 |
| OR56A1     | 1.174046 | 6.600298 | 5.584893 | 0.00179  | 0.034523 | -0.86034 |
| DUSP26     | -1.33439 | 2.968494 | -5.58067 | 0.001796 | 0.034573 | -0.86429 |
| IQCF3      | 1.178945 | 3.058974 | 5.570466 | 0.001812 | 0.03462  | -0.87381 |
| T          | 2.945318 | 3.108653 | 5.561436 | 0.001826 | 0.034666 | -0.88226 |
| THEMIS     | 1.107741 | 4.701303 | 5.549076 | 0.001846 | 0.034814 | -0.89384 |
| PPP1R2C    | -1.11877 | 3.043777 | -5.53777 | 0.001864 | 0.03482  | -0.90445 |
| DMRTB1     | 1.121566 | 1.587498 | 5.537345 | 0.001865 | 0.03482  | -0.90485 |

|            |          |          |          |          |          |          |
|------------|----------|----------|----------|----------|----------|----------|
| MTMR8      | -1.49569 | 2.370964 | -5.53711 | 0.001865 | 0.03482  | -0.90507 |
| SMG9       | -1.09506 | 3.726993 | -5.52437 | 0.001886 | 0.03482  | -0.91704 |
| CSF2       | 1.498596 | 8.829127 | 5.491654 | 0.001941 | 0.034838 | -0.9479  |
| BLOC1S1    | -1.51429 | 3.321288 | -5.4536  | 0.002007 | 0.035333 | -0.98398 |
| GSTA2      | 1.009245 | 6.624647 | 5.449749 | 0.002014 | 0.035339 | -0.98764 |
| OR7D4      | 1.834356 | 4.511382 | 5.445413 | 0.002021 | 0.035414 | -0.99177 |
| TAS1R1     | 1.79898  | 2.214584 | 5.419178 | 0.002069 | 0.03589  | -1.01679 |
| PRSS35     | 1.453011 | 1.809466 | 5.4186   | 0.00207  | 0.03589  | -1.01734 |
| OR12D2     | 1.172407 | 4.120455 | 5.404658 | 0.002096 | 0.036136 | -1.03067 |
| OR52K1     | -1.3021  | 2.038513 | -5.3853  | 0.002132 | 0.036309 | -1.04923 |
| SULT1C2    | 1.103419 | 4.307088 | 5.362815 | 0.002175 | 0.036502 | -1.07086 |
| KRT1       | 2.099578 | 2.921733 | 5.354059 | 0.002192 | 0.036502 | -1.0793  |
| CLEC3B     | -1.08656 | 4.740407 | -5.34766 | 0.002205 | 0.036529 | -1.08547 |
| ECE2       | 1.273181 | 2.962132 | 5.296776 | 0.002308 | 0.037165 | -1.13478 |
| PCDHA4     | 1.309211 | 2.047372 | 5.291779 | 0.002318 | 0.037173 | -1.13964 |
| SH2D1B     | -1.67009 | 2.262162 | -5.29177 | 0.002318 | 0.037173 | -1.13965 |
| CCL3L1     | 1.345911 | 5.717874 | 5.286326 | 0.002329 | 0.037219 | -1.14495 |
| OPN4       | -1.50452 | 2.156003 | -5.26806 | 0.002368 | 0.037447 | -1.16276 |
| ATP1A3     | 1.383162 | 1.979597 | 5.24011  | 0.002429 | 0.037988 | -1.19012 |
| CCDC129    | 2.778    | 3.152207 | 5.239514 | 0.00243  | 0.037988 | -1.1907  |
| PDZD3      | 1.249157 | 6.499116 | 5.212805 | 0.00249  | 0.038663 | -1.21695 |
| OSCAR      | 1.597912 | 6.674299 | 5.20227  | 0.002514 | 0.03891  | -1.22733 |
| SPN        | 1.307301 | 3.25155  | 5.190966 | 0.00254  | 0.039117 | -1.23848 |
| ADGRF4     | 1.903226 | 2.602618 | 5.190661 | 0.002541 | 0.039117 | -1.23878 |
| SPI1       | 1.215657 | 3.030099 | 5.184636 | 0.002555 | 0.039244 | -1.24474 |
| TRAV17     | 1.292093 | 4.593794 | 5.141771 | 0.002657 | 0.039655 | -1.28724 |
| TAS2R20    | -1.05052 | 5.957419 | -5.13663 | 0.00267  | 0.039768 | -1.29236 |
| GJD4       | 1.522601 | 2.201201 | 5.117676 | 0.002717 | 0.040112 | -1.31125 |
| CCDC152    | -1.16035 | 7.514923 | -5.11427 | 0.002725 | 0.040174 | -1.31465 |
| CST2       | -1.04819 | 2.786853 | -5.06535 | 0.002851 | 0.041087 | -1.36368 |
| UGT2A1     | -1.14944 | 4.549185 | -5.05955 | 0.002867 | 0.041107 | -1.36952 |
| DYNAP      | 1.761435 | 2.292691 | 5.048344 | 0.002897 | 0.041249 | -1.38081 |
| SLA        | 1.570078 | 2.346717 | 5.036118 | 0.00293  | 0.041418 | -1.39315 |
| KCNH4      | 1.114055 | 4.759995 | 5.015795 | 0.002986 | 0.041879 | -1.41371 |
| PDYN       | 1.070889 | 3.085796 | 5.007429 | 0.00301  | 0.04215  | -1.42219 |
| PDLIM2     | 1.172923 | 1.677887 | 4.995593 | 0.003043 | 0.042385 | -1.4342  |
| AL353579.1 | 1.064873 | 10.77719 | 4.99243  | 0.003052 | 0.042428 | -1.43742 |
| PALM2      | -1.20352 | 3.213252 | -4.97261 | 0.00311  | 0.042783 | -1.45759 |
| IL18BP     | -1.32805 | 4.025262 | -4.96121 | 0.003143 | 0.04299  | -1.46923 |
| PASD1      | 1.033328 | 2.068357 | 4.959425 | 0.003148 | 0.043034 | -1.47105 |
| APOL5      | 1.416585 | 4.067745 | 4.940966 | 0.003204 | 0.04333  | -1.48993 |
| OR3A3      | 1.604058 | 2.051942 | 4.940481 | 0.003205 | 0.04333  | -1.49043 |
| BICDL2     | 1.466824 | 3.551274 | 4.903902 | 0.003318 | 0.044059 | -1.52799 |
| CLEC1B     | -2.12018 | 4.702108 | -4.88824 | 0.003368 | 0.044192 | -1.54414 |
| CAPN12     | 1.323749 | 3.993898 | 4.875537 | 0.003409 | 0.044456 | -1.55726 |
| CTSW       | 1.195109 | 1.669151 | 4.875072 | 0.00341  | 0.044456 | -1.55774 |
| ZNF727     | 1.561254 | 3.961931 | 4.866959 | 0.003437 | 0.044623 | -1.56613 |
| C12orf57   | -1.33703 | 3.244724 | -4.84099 | 0.003523 | 0.044968 | -1.59306 |

|            |          |          |          |          |          |          |
|------------|----------|----------|----------|----------|----------|----------|
| IL15       | -1.12471 | 4.573409 | -4.84007 | 0.003526 | 0.044968 | -1.59403 |
| OR2V1      | -1.65565 | 2.229801 | -4.83619 | 0.00354  | 0.044968 | -1.59806 |
| KRT35      | -1.30397 | 3.964669 | -4.82271 | 0.003586 | 0.045178 | -1.61209 |
| CHFR       | 1.288687 | 6.909135 | 4.809409 | 0.003632 | 0.045486 | -1.62596 |
| SLC28A2    | 1.021856 | 3.216702 | 4.807673 | 0.003638 | 0.045515 | -1.62777 |
| SSC4D      | -1.50909 | 2.439416 | -4.80225 | 0.003657 | 0.045515 | -1.63344 |
| TMEM71     | -1.23623 | 5.511292 | -4.77688 | 0.003747 | 0.045961 | -1.65999 |
| SLC8A2     | 1.35771  | 5.821128 | 4.7717   | 0.003766 | 0.045964 | -1.66543 |
| C7orf62    | 1.039379 | 4.877972 | 4.750899 | 0.003843 | 0.046481 | -1.68729 |
| NAA11      | -1.86751 | 3.132556 | -4.73871 | 0.003889 | 0.046744 | -1.70013 |
| RSAD2      | -2.84303 | 3.68374  | -4.7355  | 0.003901 | 0.046744 | -1.70352 |
| SIGLEC11   | -1.35589 | 2.275043 | -4.7024  | 0.004029 | 0.047376 | -1.73853 |
| LDHAL6A    | 1.410367 | 1.807227 | 4.691075 | 0.004073 | 0.04763  | -1.75054 |
| ALG12      | 1.002272 | 4.732607 | 4.680458 | 0.004116 | 0.047828 | -1.76183 |
| GDF5       | 1.055452 | 5.200916 | 4.665291 | 0.004178 | 0.048133 | -1.77797 |
| AL357673.1 | 1.378391 | 1.737078 | 4.65677  | 0.004213 | 0.04832  | -1.78706 |
| BMP5       | 1.054991 | 3.782394 | 4.649699 | 0.004242 | 0.048425 | -1.79461 |
| TENT5C     | -1.38118 | 2.408436 | -4.64787 | 0.00425  | 0.048453 | -1.79656 |
| AC104304.1 | 1.492651 | 5.329712 | 4.646924 | 0.004254 | 0.048464 | -1.79757 |
| OR52D1     | 1.15329  | 2.091116 | 4.644016 | 0.004266 | 0.048549 | -1.80068 |
| JDP2       | 1.986835 | 10.69223 | 4.638037 | 0.004291 | 0.048736 | -1.80708 |
| ASNS       | 2.021931 | 10.57966 | 4.629806 | 0.004326 | 0.048826 | -1.81589 |
| KIAA1524   | -2.03935 | 2.676343 | -4.61096 | 0.004407 | 0.049094 | -1.8361  |
| DEFB104B   | 1.840175 | 2.80552  | 4.598867 | 0.004461 | 0.049423 | -1.84911 |
| TMEM178B   | 1.30916  | 8.908797 | 4.598175 | 0.004464 | 0.049423 | -1.84985 |
| NXPH1      | 1.544164 | 1.79276  | 4.595999 | 0.004473 | 0.049457 | -1.85219 |
| TRAV36DV7  | 1.162334 | 1.672603 | 4.5919   | 0.004491 | 0.049571 | -1.85661 |
| SLC16A6    | 1.073295 | 5.712248 | 4.585165 | 0.004522 | 0.049671 | -1.86386 |
| ERICH4     | -1.51508 | 2.114517 | -4.57858 | 0.004551 | 0.049748 | -1.87097 |
| AR         | 1.110969 | 5.007566 | 4.576321 | 0.004561 | 0.049806 | -1.87341 |
| CLDN25     | 1.728868 | 6.846051 | 4.550669 | 0.004679 | 0.050304 | -1.90115 |
| ZNF729     | -1.25603 | 1.900985 | -4.54604 | 0.004701 | 0.050387 | -1.90616 |
| LOC339862  | 1.126562 | 4.898708 | 4.540535 | 0.004727 | 0.050538 | -1.91214 |
| CD2        | 1.011537 | 4.28113  | 4.538195 | 0.004738 | 0.050601 | -1.91468 |
| GALNT14    | -1.32929 | 3.56265  | -4.51067 | 0.00487  | 0.051213 | -1.9446  |
| LCE5A      | 1.198758 | 6.824411 | 4.50918  | 0.004878 | 0.05124  | -1.94623 |
| MAGEA3     | -1.07701 | 1.659323 | -4.50572 | 0.004895 | 0.051336 | -1.95001 |
| NGF        | 1.001933 | 8.886029 | 4.492802 | 0.004959 | 0.051742 | -1.96411 |
| HTR2B      | 1.077092 | 8.587796 | 4.480628 | 0.00502  | 0.051943 | -1.97742 |
| TMEM200B   | -1.38313 | 1.895991 | -4.46855 | 0.005081 | 0.052108 | -1.99065 |
| TEX15      | -2.13403 | 3.220534 | -4.46039 | 0.005123 | 0.052285 | -1.9996  |
| KLK8       | 1.1549   | 4.39613  | 4.454069 | 0.005156 | 0.052439 | -2.00654 |
| GABPA      | -1.20057 | 3.577438 | -4.44953 | 0.00518  | 0.052521 | -2.01153 |
| FERMT1     | -1.43455 | 3.405945 | -4.44362 | 0.005211 | 0.052521 | -2.01802 |
| CHAC1      | 3.007312 | 9.565202 | 4.442173 | 0.005219 | 0.052526 | -2.01962 |
| IFITM1     | -1.34578 | 10.72853 | -4.43651 | 0.005249 | 0.052671 | -2.02586 |
| GPN3       | 1.085981 | 7.204602 | 4.430755 | 0.005279 | 0.052748 | -2.03219 |
| TNNI1      | -1.17661 | 1.786096 | -4.42699 | 0.0053   | 0.052847 | -2.03634 |

|            |          |          |          |          |          |          |
|------------|----------|----------|----------|----------|----------|----------|
| OR10G4     | 1.165177 | 2.265971 | 4.426394 | 0.005303 | 0.052853 | -2.037   |
| SMIM9      | 1.028121 | 4.900385 | 4.422373 | 0.005325 | 0.05294  | -2.04143 |
| AC132217.2 | -1.2526  | 3.216005 | -4.41796 | 0.005348 | 0.053116 | -2.04631 |
| OR10T2     | 1.091336 | 4.069647 | 4.389852 | 0.005504 | 0.053953 | -2.0774  |
| PLD4       | 1.552337 | 2.053731 | 4.384615 | 0.005533 | 0.054058 | -2.08321 |
| SP140      | -1.15795 | 3.223376 | -4.37994 | 0.00556  | 0.054154 | -2.0884  |
| PRKACG     | 1.114016 | 2.511936 | 4.37982  | 0.00556  | 0.054154 | -2.08853 |
| MEIS1      | -1.1076  | 3.958621 | -4.37644 | 0.00558  | 0.054264 | -2.09229 |
| IFI44      | -1.06995 | 6.708832 | -4.37392 | 0.005594 | 0.054334 | -2.09509 |
| DDX53      | 1.238203 | 6.647009 | 4.372464 | 0.005602 | 0.054382 | -2.0967  |
| IL1RAPL2   | 1.062987 | 4.253929 | 4.361309 | 0.005667 | 0.054669 | -2.10911 |
| FAM227A    | -1.01606 | 4.36333  | -4.35464 | 0.005706 | 0.054789 | -2.11654 |
| KCNJ13     | 1.21148  | 2.031087 | 4.344671 | 0.005764 | 0.055006 | -2.12765 |
| C1orf228   | 1.064183 | 7.040035 | 4.341171 | 0.005785 | 0.055015 | -2.13156 |
| LRRC63     | -1.05551 | 2.636643 | -4.34008 | 0.005791 | 0.05504  | -2.13277 |
| EML5       | -1.30431 | 3.292851 | -4.3385  | 0.005801 | 0.055055 | -2.13453 |
| KRT6A      | 1.344684 | 4.295834 | 4.325261 | 0.00588  | 0.055497 | -2.14934 |
| DHRS4      | -1.07956 | 3.488886 | -4.32488 | 0.005883 | 0.055497 | -2.14976 |
| OGN        | -1.71579 | 2.429745 | -4.32187 | 0.005901 | 0.055533 | -2.15314 |
| AC007846.2 | -1.09542 | 1.899158 | -4.31553 | 0.00594  | 0.055555 | -2.16023 |
| VMAC       | -1.55956 | 2.412749 | -4.31134 | 0.005965 | 0.055555 | -2.16493 |
| REELD1     | -1.28967 | 2.408129 | -4.31015 | 0.005973 | 0.055555 | -2.16625 |
| PCK2       | 1.411666 | 11.32776 | 4.307878 | 0.005987 | 0.055583 | -2.16881 |
| MAP3K9     | -1.21041 | 2.246351 | -4.30785 | 0.005987 | 0.055583 | -2.16884 |
| SPATA22    | 1.223016 | 2.015328 | 4.301485 | 0.006026 | 0.055823 | -2.17598 |
| MRPL23     | -1.45379 | 2.706519 | -4.29005 | 0.006098 | 0.056168 | -2.18883 |
| C4orf50    | 1.11906  | 1.681744 | 4.289848 | 0.006099 | 0.056168 | -2.18905 |
| C3orf84    | -1.25212 | 4.052729 | -4.28811 | 0.00611  | 0.056244 | -2.19101 |
| CPB2       | 1.028079 | 3.865683 | 4.265169 | 0.006257 | 0.056682 | -2.21685 |
| TNFSF15    | 1.049871 | 13.6656  | 4.252477 | 0.006341 | 0.057009 | -2.23118 |
| AL603764.2 | 1.238802 | 5.930956 | 4.246834 | 0.006378 | 0.057239 | -2.23756 |
| MYO7A      | 1.445241 | 2.174005 | 4.24507  | 0.00639  | 0.057319 | -2.23956 |
| WFIKKN1    | -1.30625 | 2.075168 | -4.23831 | 0.006435 | 0.057522 | -2.24721 |
| SLC24A4    | 1.557489 | 2.149724 | 4.236375 | 0.006448 | 0.057592 | -2.2494  |
| ASB11      | 1.733155 | 1.973709 | 4.209227 | 0.006633 | 0.058429 | -2.28021 |
| FADS3      | -1.04613 | 2.152918 | -4.19906 | 0.006704 | 0.058672 | -2.29178 |
| HKDC1      | 1.884791 | 3.934131 | 4.191257 | 0.006759 | 0.05888  | -2.30067 |
| AADAACL2   | 1.247778 | 1.814099 | 4.186654 | 0.006792 | 0.05899  | -2.30592 |
| IGHV3-30   | 1.035063 | 4.530737 | 4.166029 | 0.006941 | 0.059826 | -2.32948 |
| OR10G2     | 1.461243 | 2.861541 | 4.147911 | 0.007075 | 0.060528 | -2.35023 |
| MFSD4A     | -1.21414 | 3.853223 | -4.14606 | 0.007089 | 0.060528 | -2.35236 |
| HAP1       | 1.063348 | 2.133939 | 4.135388 | 0.007169 | 0.060718 | -2.36461 |
| OR2G2      | 1.16933  | 2.066245 | 4.132091 | 0.007194 | 0.060727 | -2.36839 |
| S100A8     | 1.285285 | 1.729864 | 4.129779 | 0.007212 | 0.060727 | -2.37105 |
| IL23R      | 1.016762 | 2.559859 | 4.117674 | 0.007305 | 0.060962 | -2.38498 |
| SPSB4      | -1.0995  | 2.599549 | -4.10745 | 0.007385 | 0.061182 | -2.39676 |
| FAM26D     | -2.39707 | 3.239104 | -4.09615 | 0.007474 | 0.061515 | -2.4098  |
| MS4A15     | -1.04652 | 1.874486 | -4.08755 | 0.007542 | 0.061758 | -2.41975 |

|              |          |          |          |          |          |          |
|--------------|----------|----------|----------|----------|----------|----------|
| DCLK1        | -1.24811 | 3.979341 | -4.08204 | 0.007587 | 0.061827 | -2.42612 |
| PCID2        | -1.01942 | 5.054172 | -4.08054 | 0.007599 | 0.061827 | -2.42785 |
| KAL1         | -1.80081 | 2.9306   | -4.04606 | 0.007884 | 0.062996 | -2.46786 |
| NEUROD1      | 1.229412 | 1.994551 | 4.046017 | 0.007884 | 0.062996 | -2.46791 |
| TRIML1       | 1.773515 | 1.934392 | 4.041622 | 0.007922 | 0.063182 | -2.47302 |
| DLG3         | 1.677002 | 6.504931 | 4.041052 | 0.007927 | 0.063182 | -2.47368 |
| FBP1         | -1.30938 | 2.731241 | -4.03631 | 0.007967 | 0.06331  | -2.47921 |
| LGR5         | 1.020073 | 1.592389 | 4.031732 | 0.008006 | 0.063423 | -2.48454 |
| GPR174       | 1.765711 | 1.978102 | 4.030214 | 0.008019 | 0.063442 | -2.48631 |
| TUBAL3       | -1.26019 | 3.565789 | -4.02752 | 0.008042 | 0.063514 | -2.48945 |
| PCDHGB2      | -1.16874 | 2.749148 | -4.02075 | 0.008101 | 0.063585 | -2.49735 |
| PTGDR2       | -1.93113 | 2.500996 | -4.01972 | 0.00811  | 0.063631 | -2.49854 |
| BOLA2-SMG1P6 | -1.14081 | 3.815185 | -4.01227 | 0.008175 | 0.063902 | -2.50725 |
| VEGFA        | 1.21035  | 9.293075 | 4.009618 | 0.008199 | 0.064007 | -2.51034 |
| SARM1        | -1.2753  | 2.121936 | -3.97312 | 0.008528 | 0.065357 | -2.55311 |
| PIWIL2       | -1.14833 | 1.755163 | -3.9703  | 0.008554 | 0.065436 | -2.55643 |
| EPSTI1       | -1.06008 | 9.356257 | -3.9649  | 0.008604 | 0.065561 | -2.56277 |
| CAMKV        | 1.029492 | 2.007539 | 3.961349 | 0.008638 | 0.065703 | -2.56694 |
| OSM          | 1.123495 | 5.505054 | 3.952247 | 0.008723 | 0.066158 | -2.57766 |
| CSF3         | 1.09678  | 8.391616 | 3.943744 | 0.008804 | 0.066501 | -2.58768 |
| OR10C1       | 1.130718 | 1.896639 | 3.940389 | 0.008836 | 0.066645 | -2.59164 |
| OR4A47       | 1.048713 | 6.716897 | 3.930958 | 0.008927 | 0.067061 | -2.60277 |
| NOXRED1      | 1.404016 | 3.361708 | 3.908193 | 0.009152 | 0.068041 | -2.6297  |
| KLHL38       | 1.52296  | 2.2244   | 3.907939 | 0.009154 | 0.068041 | -2.63    |
| GPR27        | 1.04451  | 4.39335  | 3.904415 | 0.00919  | 0.068142 | -2.63418 |
| ZIC3         | 1.260558 | 1.648955 | 3.900739 | 0.009227 | 0.068305 | -2.63854 |
| NOTCH3       | 1.3058   | 7.35031  | 3.895325 | 0.009281 | 0.068512 | -2.64496 |
| OR8U8        | 1.922395 | 2.656925 | 3.888354 | 0.009352 | 0.06876  | -2.65324 |
| CHRNA10      | -1.12509 | 2.862402 | -3.88433 | 0.009394 | 0.068796 | -2.65802 |
| LYPD5        | -1.09062 | 2.599797 | -3.8804  | 0.009434 | 0.069029 | -2.66269 |
| OR2V2        | 1.584705 | 2.799449 | 3.878644 | 0.009453 | 0.069102 | -2.66478 |
| SPACA3       | 1.705612 | 2.783292 | 3.878056 | 0.009459 | 0.069105 | -2.66548 |
| GRID1        | 1.134808 | 2.79728  | 3.871828 | 0.009523 | 0.069152 | -2.67289 |
| DEFB125      | 1.49569  | 2.187713 | 3.8688   | 0.009555 | 0.069259 | -2.6765  |
| EIF4E1B      | 1.770369 | 3.369003 | 3.86686  | 0.009576 | 0.069333 | -2.67881 |
| FOXG1        | -1.22837 | 1.976939 | -3.86402 | 0.009605 | 0.069451 | -2.68219 |
| LOC100505549 | -1.00213 | 4.506151 | -3.86284 | 0.009618 | 0.069468 | -2.6836  |
| LOR          | 1.522346 | 2.644494 | 3.861037 | 0.009637 | 0.069487 | -2.68575 |
| FOXD2        | 1.179932 | 1.873185 | 3.844507 | 0.009814 | 0.070091 | -2.70548 |
| C8orf58      | -1.06431 | 3.8557   | -3.83612 | 0.009905 | 0.070447 | -2.7155  |
| FAM204A      | -1.5961  | 3.702184 | -3.83068 | 0.009965 | 0.070749 | -2.72202 |
| PDZD4        | 1.092481 | 5.900281 | 3.819474 | 0.010089 | 0.071333 | -2.73544 |
| KLF4         | 1.837264 | 9.230617 | 3.818704 | 0.010097 | 0.071344 | -2.73636 |
| GPR87        | -1.41798 | 2.702043 | -3.81649 | 0.010122 | 0.071403 | -2.73901 |
| AC008537.1   | 1.017111 | 4.284511 | 3.816452 | 0.010123 | 0.071403 | -2.73906 |
| ADAMTS16     | 1.050668 | 2.765327 | 3.801215 | 0.010295 | 0.071772 | -2.75735 |
| ADAMTS15     | -1.21723 | 5.203922 | -3.78864 | 0.010439 | 0.072386 | -2.77248 |

|            |          |          |          |          |          |          |
|------------|----------|----------|----------|----------|----------|----------|
| HDAC8      | -1.07453 | 4.991931 | -3.77722 | 0.010573 | 0.072832 | -2.78624 |
| CCDC27     | -1.04823 | 5.322903 | -3.75946 | 0.010784 | 0.073382 | -2.80766 |
| LIF        | 1.652718 | 2.67146  | 3.751601 | 0.010879 | 0.07371  | -2.81717 |
| NECAB2     | 1.076207 | 2.003221 | 3.747802 | 0.010925 | 0.073814 | -2.82176 |
| SGCZ       | 1.465251 | 2.488916 | 3.747672 | 0.010927 | 0.073814 | -2.82192 |
| FAM47A     | 1.854681 | 2.917287 | 3.724288 | 0.011216 | 0.074929 | -2.85026 |
| KRTAP10-11 | 1.592785 | 2.144087 | 3.71741  | 0.011303 | 0.075263 | -2.85861 |
| KRTAP12-2  | 1.016837 | 4.944711 | 3.707018 | 0.011436 | 0.075659 | -2.87124 |
| PDZK1      | -1.12257 | 5.017244 | -3.69569 | 0.011582 | 0.076201 | -2.88503 |
| OR2T27     | 1.520812 | 3.933686 | 3.695113 | 0.01159  | 0.076204 | -2.88574 |
| IDO1       | -1.24348 | 5.159984 | -3.69368 | 0.011608 | 0.076265 | -2.88748 |
| OR2T10     | -1.36243 | 2.80547  | -3.69329 | 0.011613 | 0.076265 | -2.88796 |
| KRT77      | 1.071645 | 2.836601 | 3.685588 | 0.011715 | 0.076631 | -2.89735 |
| BTLA       | 1.082697 | 2.333515 | 3.681262 | 0.011772 | 0.076714 | -2.90262 |
| MAPT       | 1.072069 | 8.334767 | 3.668953 | 0.011936 | 0.077463 | -2.91766 |
| DPYS       | 1.258606 | 2.074621 | 3.665752 | 0.01198  | 0.077556 | -2.92157 |
| PNMT       | -1.24049 | 3.563711 | -3.66012 | 0.012056 | 0.077723 | -2.92846 |
| RNF17      | 1.480598 | 2.472417 | 3.635374 | 0.012399 | 0.078887 | -2.95879 |
| TMPRSS11E  | 1.241222 | 1.689133 | 3.63201  | 0.012446 | 0.079056 | -2.96292 |
| TAS2R13    | -1.27822 | 2.883327 | -3.62525 | 0.012542 | 0.079435 | -2.97122 |
| ERBB4      | -1.68375 | 2.360938 | -3.62269 | 0.012578 | 0.079561 | -2.97437 |
| AMER3      | 1.816414 | 2.343045 | 3.612198 | 0.012729 | 0.079972 | -2.98728 |
| PCDHA1     | 1.539438 | 4.764627 | 3.601947 | 0.012879 | 0.080498 | -2.99991 |
| FXN        | -1.29174 | 3.762975 | -3.59113 | 0.013039 | 0.081007 | -3.01325 |
| C17orf104  | -1.2331  | 2.085292 | -3.59026 | 0.013052 | 0.081008 | -3.01432 |
| TRPC7      | 1.017056 | 5.365493 | 3.58757  | 0.013092 | 0.081035 | -3.01764 |
| CLEC2D     | 1.041227 | 3.938239 | 3.585971 | 0.013116 | 0.081128 | -3.01962 |
| CEBPB      | 1.27223  | 11.30855 | 3.573362 | 0.013306 | 0.08159  | -3.0352  |
| LOC93432   | 1.55091  | 2.304067 | 3.569757 | 0.013361 | 0.081681 | -3.03966 |
| PSAT1      | 1.098238 | 10.09327 | 3.567687 | 0.013393 | 0.081681 | -3.04223 |
| FER1L6     | -1.61913 | 2.717035 | -3.56579 | 0.013422 | 0.081763 | -3.04457 |
| C8orf89    | 1.030867 | 1.915836 | 3.563507 | 0.013457 | 0.081829 | -3.0474  |
| KIR2DS4    | 1.810543 | 6.096693 | 3.540132 | 0.013823 | 0.082993 | -3.07639 |
| SRRM3      | 1.233613 | 5.55322  | 3.539832 | 0.013827 | 0.082997 | -3.07676 |
| ZNF316     | -1.33644 | 3.260236 | -3.5259  | 0.014051 | 0.083824 | -3.09409 |
| PLP1       | 1.777765 | 2.385773 | 3.525677 | 0.014054 | 0.083824 | -3.09436 |
| CTAG2      | -1.39469 | 2.849537 | -3.52214 | 0.014112 | 0.08391  | -3.09876 |
| CKMT2      | -1.02328 | 2.268749 | -3.51739 | 0.014189 | 0.084128 | -3.10468 |
| TEX26      | 2.235112 | 3.070655 | 3.488523 | 0.01467  | 0.085741 | -3.14069 |
| OR5BS1P    | 1.333386 | 2.437086 | 3.472364 | 0.014947 | 0.086619 | -3.16091 |
| OTULINL    | -1.62154 | 3.138712 | -3.4653  | 0.01507  | 0.087159 | -3.16975 |
| IFNA10     | 2.035289 | 3.883616 | 3.455159 | 0.015249 | 0.087856 | -3.18247 |
| SYCP1      | 1.123035 | 3.932244 | 3.444865 | 0.015433 | 0.088553 | -3.1954  |
| TSGA10IP   | 1.05101  | 3.958579 | 3.443328 | 0.01546  | 0.088612 | -3.19733 |
| C1QTNF9    | -1.10111 | 2.180431 | -3.43662 | 0.015581 | 0.089057 | -3.20575 |
| SMIM10L2A  | 1.020838 | 3.300293 | 3.434968 | 0.015611 | 0.08913  | -3.20784 |
| CCDC158    | 1.394875 | 2.111972 | 3.430843 | 0.015687 | 0.08931  | -3.21303 |
| AC004805.1 | -1.46267 | 3.487064 | -3.4149  | 0.015981 | 0.090061 | -3.23311 |

|            |          |          |          |          |          |          |
|------------|----------|----------|----------|----------|----------|----------|
| AL031847.2 | -1.216   | 2.901352 | -3.404   | 0.016186 | 0.090916 | -3.24686 |
| CENPE      | -1.18884 | 10.56199 | -3.39901 | 0.016281 | 0.091198 | -3.25316 |
| DPEP2      | 1.23538  | 1.851497 | 3.397064 | 0.016318 | 0.091331 | -3.25561 |
| SFRP4      | 1.151987 | 2.463023 | 3.384583 | 0.016559 | 0.092048 | -3.27139 |
| ACSM4      | -1.05317 | 4.184155 | -3.3729  | 0.016788 | 0.092803 | -3.28618 |
| PLEKHA6    | -1.08855 | 5.61115  | -3.36358 | 0.016973 | 0.093434 | -3.29799 |
| CLEC20A    | -1.07291 | 4.008948 | -3.33413 | 0.017572 | 0.095224 | -3.33541 |
| CAPS       | -1.53118 | 2.87339  | -3.33228 | 0.017611 | 0.095381 | -3.33776 |
| RYBP       | -1.25611 | 2.252655 | -3.32953 | 0.017668 | 0.095539 | -3.34126 |
| DLGAP1     | -1.35971 | 2.486183 | -3.32484 | 0.017766 | 0.095817 | -3.34722 |
| AC018709.1 | 1.08837  | 3.536617 | 3.32324  | 0.0178   | 0.095883 | -3.34927 |
| INSYN2A    | -1.36987 | 2.977607 | -3.31988 | 0.017871 | 0.096065 | -3.35355 |
| DPPA5      | 1.528327 | 2.996982 | 3.318397 | 0.017902 | 0.096095 | -3.35544 |
| BEND5      | 1.113891 | 3.825264 | 3.31542  | 0.017965 | 0.096283 | -3.35923 |
| MAFA       | -1.4758  | 2.589613 | -3.30929 | 0.018096 | 0.096681 | -3.36706 |
| CR1        | 1.500928 | 2.290679 | 3.30365  | 0.018218 | 0.097075 | -3.37425 |
| OR8A1      | 1.122774 | 5.69219  | 3.301203 | 0.018271 | 0.097206 | -3.37737 |
| ETNPPL     | 1.572378 | 2.396695 | 3.288504 | 0.018548 | 0.097969 | -3.3936  |
| CDY2A      | 1.108003 | 1.966367 | 3.287211 | 0.018577 | 0.098095 | -3.39526 |
| COL4A6     | -1.16736 | 4.031724 | -3.26214 | 0.019139 | 0.09983  | -3.42737 |
| TMEM210    | 1.29778  | 4.801904 | 3.261036 | 0.019165 | 0.099885 | -3.42878 |
| SLC6A9     | 1.752466 | 4.262624 | 3.256873 | 0.01926  | 0.100229 | -3.43412 |
| ZBTB8B     | -1.19013 | 4.072622 | -3.25231 | 0.019365 | 0.100648 | -3.43997 |
| PRR21      | 1.222322 | 7.02583  | 3.251085 | 0.019394 | 0.100698 | -3.44155 |
| WFDC5      | 2.729352 | 5.739442 | 3.239086 | 0.019674 | 0.101409 | -3.45697 |
| COL9A1     | 1.022718 | 2.657825 | 3.234867 | 0.019773 | 0.101606 | -3.46239 |
| IGHV7-4-1  | 1.418467 | 3.809354 | 3.228292 | 0.019929 | 0.101868 | -3.47085 |
| F2RL3      | 1.139475 | 7.764788 | 3.222717 | 0.020063 | 0.102274 | -3.47803 |
| CXCR1      | 1.006038 | 4.332915 | 3.200583 | 0.020603 | 0.103735 | -3.50657 |
| ABRA       | -1.60928 | 2.480838 | -3.19764 | 0.020676 | 0.10383  | -3.51036 |
| RRH        | 1.026897 | 3.748313 | 3.193389 | 0.020782 | 0.104061 | -3.51586 |
| TEX49      | 1.314096 | 1.752268 | 3.191919 | 0.020819 | 0.104181 | -3.51776 |
| ULBP1      | 1.233515 | 9.774881 | 3.181845 | 0.021073 | 0.104888 | -3.53078 |
| GRIP1      | 1.131683 | 4.900805 | 3.181376 | 0.021085 | 0.104896 | -3.53139 |
| GCNT7      | 1.280975 | 2.384209 | 3.179938 | 0.021121 | 0.105009 | -3.53325 |
| OR5AU1     | 1.365324 | 2.260462 | 3.178898 | 0.021148 | 0.105082 | -3.53459 |
| DDIT3      | 3.193181 | 11.29101 | 3.173699 | 0.021281 | 0.105538 | -3.54132 |
| LELP1      | 2.192317 | 3.00008  | 3.166697 | 0.021461 | 0.105843 | -3.55039 |
| REN        | 1.44162  | 2.778871 | 3.165227 | 0.0215   | 0.105954 | -3.55229 |
| TRAV13-1   | -1.10058 | 2.604217 | -3.16353 | 0.021544 | 0.10607  | -3.5545  |
| TCF23      | 1.284056 | 2.052952 | 3.163133 | 0.021554 | 0.106088 | -3.55501 |
| SIAH3      | 1.610559 | 3.595286 | 3.158096 | 0.021685 | 0.106384 | -3.56153 |
| ETDB       | -1.35744 | 2.696003 | -3.15379 | 0.021799 | 0.10655  | -3.56712 |
| SOGA3      | 1.784558 | 6.658376 | 3.143431 | 0.022074 | 0.107412 | -3.58056 |
| PCDHA13    | 2.01513  | 2.843884 | 3.142072 | 0.02211  | 0.107487 | -3.58233 |
| BMP4       | -1.01876 | 13.08601 | -3.13453 | 0.022313 | 0.108095 | -3.59212 |
| PCSK1N     | 1.196507 | 11.31991 | 3.129034 | 0.022462 | 0.108631 | -3.59927 |
| GREM2      | -1.31078 | 4.011749 | -3.12512 | 0.022569 | 0.108813 | -3.60435 |

|           |          |          |          |          |          |          |
|-----------|----------|----------|----------|----------|----------|----------|
| OR5B21    | 1.840976 | 3.26798  | 3.11819  | 0.02276  | 0.109188 | -3.61338 |
| GHSR      | 1.001863 | 3.767697 | 3.111975 | 0.022932 | 0.109685 | -3.62147 |
| S100A14   | -1.26228 | 1.940794 | -3.10261 | 0.023195 | 0.110381 | -3.63367 |
| IL17REL   | 1.003493 | 3.34138  | 3.102506 | 0.023198 | 0.110381 | -3.63381 |
| OR2L3     | -1.29535 | 3.180098 | -3.0848  | 0.023703 | 0.111729 | -3.6569  |
| CMKLR1    | 1.029402 | 2.264133 | 3.081929 | 0.023787 | 0.111952 | -3.66066 |
| OR10AD1   | 1.342467 | 3.563838 | 3.081476 | 0.0238   | 0.111952 | -3.66125 |
| TRIB3     | 1.368945 | 9.769752 | 3.074561 | 0.024001 | 0.112636 | -3.67029 |
| PRG2      | 1.203461 | 2.755636 | 3.070274 | 0.024127 | 0.113041 | -3.67589 |
| CXCL2     | 1.092671 | 11.74006 | 3.070162 | 0.024131 | 0.113041 | -3.67604 |
| MEP1A     | -1.00586 | 2.679346 | -3.06691 | 0.024227 | 0.113337 | -3.6803  |
| PRR18     | 1.215702 | 3.636471 | 3.066537 | 0.024238 | 0.113361 | -3.68078 |
| KLC1      | -1.46248 | 2.315399 | -3.06335 | 0.024333 | 0.113518 | -3.68495 |
| SLC22A8   | 1.028019 | 4.040758 | 3.052472 | 0.024659 | 0.114343 | -3.69919 |
| C12orf71  | -1.44075 | 3.010993 | -3.04555 | 0.024869 | 0.114808 | -3.70827 |
| HIST1H2BF | -1.82179 | 3.494667 | -3.04542 | 0.024873 | 0.114808 | -3.70844 |
| CASP14    | 1.906799 | 2.613367 | 3.036451 | 0.025148 | 0.115504 | -3.7202  |
| BSX       | 1.534156 | 2.516186 | 3.027012 | 0.025441 | 0.116405 | -3.73259 |
| PPP1R42   | -1.33356 | 2.781948 | -3.02153 | 0.025613 | 0.116905 | -3.73979 |
| PROZ      | -1.50162 | 1.915135 | -3.01586 | 0.025792 | 0.117303 | -3.74723 |
| STX1B     | 1.050196 | 3.428598 | 3.012893 | 0.025886 | 0.117626 | -3.75114 |
| SLC16A9   | -1.17843 | 2.982664 | -3.00829 | 0.026033 | 0.117956 | -3.75718 |
| ACKR1     | -1.74985 | 2.388187 | -3.00277 | 0.026211 | 0.118524 | -3.76445 |
| MTUS2     | 1.40203  | 1.808924 | 2.996712 | 0.026407 | 0.118965 | -3.77243 |
| TMEM101   | -1.00853 | 2.230724 | -2.99328 | 0.026519 | 0.1192   | -3.77694 |
| C2CD4B    | 1.256605 | 12.00444 | 2.990574 | 0.026608 | 0.119501 | -3.78051 |
| C1orf159  | -1.23767 | 3.414547 | -2.98206 | 0.026889 | 0.12021  | -3.79174 |
| MC3R      | 1.040052 | 4.262185 | 2.976057 | 0.027089 | 0.120708 | -3.79965 |
| GAGE7     | 1.049233 | 2.816404 | 2.975849 | 0.027096 | 0.120713 | -3.79992 |
| CNDP1     | 1.184435 | 3.981526 | 2.960312 | 0.027622 | 0.12194  | -3.82043 |
| CSN3      | -1.27164 | 2.077577 | -2.959   | 0.027666 | 0.121999 | -3.82216 |
| EID1      | -1.04992 | 4.649527 | -2.95412 | 0.027834 | 0.122377 | -3.82861 |
| RASL11A   | -1.26979 | 3.541352 | -2.93759 | 0.028411 | 0.123717 | -3.85048 |
| DDIT4     | 1.551043 | 14.01642 | 2.935021 | 0.028502 | 0.12394  | -3.85387 |
| LURAP1L   | 1.660123 | 7.79418  | 2.915404 | 0.029205 | 0.125996 | -3.87986 |
| MOGAT3    | 1.0944   | 3.008656 | 2.912184 | 0.029323 | 0.126231 | -3.88413 |
| ZNF835    | 1.084142 | 2.917872 | 2.90044  | 0.029755 | 0.12714  | -3.89971 |
| TRAV34    | 1.133787 | 1.92488  | 2.89926  | 0.029799 | 0.127188 | -3.90128 |
| DEFB130B  | -1.26113 | 1.816569 | -2.89908 | 0.029805 | 0.12719  | -3.90152 |
| ADM2      | 1.034968 | 6.740174 | 2.894085 | 0.029992 | 0.127692 | -3.90815 |
| RASD1     | 1.322462 | 11.25629 | 2.893302 | 0.030021 | 0.127789 | -3.90919 |
| TLR10     | 1.458311 | 2.186718 | 2.890353 | 0.030132 | 0.127995 | -3.91311 |
| CFC1      | 1.683399 | 3.240026 | 2.88878  | 0.030191 | 0.12814  | -3.9152  |
| ASB18     | -1.73083 | 3.720949 | -2.87579 | 0.030685 | 0.129619 | -3.93247 |
| NPY5R     | -1.10618 | 2.813929 | -2.84435 | 0.031917 | 0.13236  | -3.97434 |
| TRMT1     | -1.12275 | 2.6237   | -2.84227 | 0.032001 | 0.132578 | -3.97711 |
| SLC10A1   | 1.373725 | 2.713413 | 2.829158 | 0.032532 | 0.133993 | -3.9946  |
| UBQLNL    | -1.1553  | 2.516406 | -2.82243 | 0.032808 | 0.134481 | -4.00358 |



|           |          |          |          |          |          |          |
|-----------|----------|----------|----------|----------|----------|----------|
| SPATA31A3 | -1.08281 | 1.845884 | -2.82117 | 0.032861 | 0.134612 | -4.00527 |
| PFKFB1    | 1.32621  | 3.222071 | 2.812238 | 0.033232 | 0.135575 | -4.01721 |
| FIGLA     | 1.34005  | 2.523285 | 2.809502 | 0.033347 | 0.135662 | -4.02086 |
| CACNA1D   | 1.140152 | 1.663194 | 2.809303 | 0.033355 | 0.135662 | -4.02113 |
| SERTAD1   | -1.04726 | 2.098444 | -2.80596 | 0.033496 | 0.135911 | -4.0256  |
| ZBTB7C    | 1.046889 | 4.948505 | 2.800866 | 0.033712 | 0.136268 | -4.03241 |
| FAM129A   | 1.016959 | 6.800862 | 2.799975 | 0.03375  | 0.136346 | -4.0336  |
| HSPA5     | 1.049297 | 12.92471 | 2.799108 | 0.033787 | 0.136414 | -4.03476 |
| LACTBL1   | -1.02589 | 1.629845 | -2.77676 | 0.034754 | 0.13884  | -4.06468 |
| ALDH1L2   | 1.277943 | 7.161056 | 2.776294 | 0.034774 | 0.13884  | -4.0653  |
| CORIN     | -1.00761 | 4.662869 | -2.76128 | 0.035441 | 0.140326 | -4.08543 |
| IP6K3     | 1.302669 | 2.845308 | 2.746714 | 0.036102 | 0.141575 | -4.10498 |
| PENK      | -1.17772 | 3.171444 | -2.74657 | 0.036108 | 0.141575 | -4.10517 |
| KIF17     | 1.148441 | 3.613225 | 2.738081 | 0.0365   | 0.142446 | -4.11657 |
| POM121L2  | 1.037401 | 3.760402 | 2.737956 | 0.036505 | 0.142446 | -4.11674 |
| IGFL3     | -1.47903 | 1.860009 | -2.73738 | 0.036532 | 0.142494 | -4.11751 |
| DNAJB9    | 1.847055 | 10.82932 | 2.737352 | 0.036533 | 0.142494 | -4.11755 |
| CDCP2     | 1.069581 | 2.239944 | 2.733879 | 0.036695 | 0.142774 | -4.12222 |
| OVOL2     | 1.006145 | 3.385922 | 2.731315 | 0.036815 | 0.143104 | -4.12566 |
| RNF212B   | 1.085718 | 1.96818  | 2.721638 | 0.03727  | 0.143865 | -4.13867 |
| RD3       | -1.52266 | 2.899939 | -2.71212 | 0.037724 | 0.144636 | -4.15147 |
| APOBEC3A  | -1.38577 | 2.226967 | -2.71201 | 0.03773  | 0.144636 | -4.15162 |
| HECW1     | 1.215811 | 2.742472 | 2.704444 | 0.038095 | 0.145342 | -4.1618  |
| OPN1MW3   | 1.458504 | 5.324175 | 2.703201 | 0.038156 | 0.145433 | -4.16347 |
| HMOX1     | 1.16586  | 15.50007 | 2.699018 | 0.03836  | 0.145732 | -4.16911 |
| HSPA6     | 2.775734 | 5.449317 | 2.697569 | 0.03843  | 0.145893 | -4.17106 |
| AGTR1     | -1.05628 | 3.009619 | -2.69585 | 0.038515 | 0.146094 | -4.17338 |
| VLDLR     | 1.084493 | 3.966931 | 2.695567 | 0.038529 | 0.146094 | -4.17375 |
| AMELX     | -1.33465 | 1.68462  | -2.69547 | 0.038533 | 0.146094 | -4.17388 |
| SEZ6L     | 1.363172 | 3.241005 | 2.692339 | 0.038688 | 0.146192 | -4.1781  |
| FRG2B     | -1.04297 | 2.29117  | -2.69116 | 0.038746 | 0.146385 | -4.1797  |
| CACNG7    | -1.37377 | 4.146888 | -2.68923 | 0.038842 | 0.146611 | -4.1823  |
| SLC1A4    | 1.17491  | 6.199676 | 2.682774 | 0.039163 | 0.147199 | -4.19099 |
| B3GALT2   | -1.11591 | 4.278768 | -2.67988 | 0.039308 | 0.147554 | -4.19489 |
| PRAC2     | 1.155182 | 2.866808 | 2.679231 | 0.039341 | 0.147597 | -4.19577 |
| LIN28A    | 1.87665  | 3.385732 | 2.674663 | 0.039571 | 0.148059 | -4.20192 |
| ERICH6    | -1.35848 | 2.245487 | -2.67463 | 0.039573 | 0.148059 | -4.20197 |
| SERTM1    | 1.005102 | 3.390059 | 2.668432 | 0.039887 | 0.148666 | -4.21033 |
| OR4X2     | -1.03532 | 5.529648 | -2.66739 | 0.03994  | 0.148784 | -4.21173 |
| PLPPR1    | 1.381578 | 2.62451  | 2.658147 | 0.040416 | 0.149546 | -4.22421 |
| STC2      | 1.321829 | 8.106062 | 2.645616 | 0.04107  | 0.150972 | -4.24112 |
| VN1R5     | -1.42231 | 4.45686  | -2.64383 | 0.041164 | 0.15112  | -4.24354 |
| SLC22A3   | 1.188478 | 1.668986 | 2.640652 | 0.041332 | 0.15134  | -4.24783 |
| BRSK2     | 1.263595 | 2.879322 | 2.630706 | 0.041863 | 0.152366 | -4.26127 |
| PCDHA12   | 1.031548 | 2.97005  | 2.630405 | 0.041879 | 0.152398 | -4.26167 |
| DRD5      | 1.455513 | 2.885756 | 2.629943 | 0.041904 | 0.152419 | -4.2623  |
| MYBPHL    | 1.284807 | 2.886606 | 2.629883 | 0.041907 | 0.152419 | -4.26238 |
| TNFAIP8L2 | -1.03111 | 2.464432 | -2.62126 | 0.042374 | 0.153354 | -4.27404 |

|           |          |          |          |          |          |          |
|-----------|----------|----------|----------|----------|----------|----------|
| KDF1      | 1.221056 | 1.682234 | 2.611971 | 0.042883 | 0.154214 | -4.2866  |
| CFAP206   | 2.044605 | 3.085803 | 2.610765 | 0.04295  | 0.154318 | -4.28823 |
| KIAA0226L | 1.285055 | 1.980926 | 2.607943 | 0.043106 | 0.15464  | -4.29205 |
| TP53TG5   | 1.184457 | 3.112005 | 2.607904 | 0.043108 | 0.15464  | -4.2921  |
| CDH17     | 1.195518 | 3.409804 | 2.607184 | 0.043148 | 0.15464  | -4.29308 |
| RGS18     | 1.055742 | 3.051226 | 2.606141 | 0.043206 | 0.154695 | -4.29449 |
| C8orf4    | 1.167651 | 10.41839 | 2.602742 | 0.043396 | 0.155265 | -4.29909 |
| OR2C1     | 1.028032 | 2.298954 | 2.598059 | 0.043658 | 0.155877 | -4.30543 |
| OR5H6     | -1.17788 | 2.842089 | -2.58811 | 0.044221 | 0.156875 | -4.3189  |
| ZG16      | 1.111389 | 5.649657 | 2.581173 | 0.044619 | 0.157695 | -4.3283  |
| C2CD4A    | 1.178313 | 4.909297 | 2.575826 | 0.044928 | 0.158195 | -4.33554 |
| CYP2A7    | 1.790886 | 2.51802  | 2.532299 | 0.04753  | 0.163385 | -4.39458 |
| MBOAT4    | -1.36042 | 1.802384 | -2.52946 | 0.047705 | 0.163744 | -4.39843 |
| SLC17A1   | 1.089865 | 1.768964 | 2.528716 | 0.047751 | 0.163803 | -4.39944 |
| ITPRID1   | 1.450352 | 1.82359  | 2.525358 | 0.04796  | 0.16427  | -4.404   |
| HERPUD1   | 2.246728 | 4.890955 | 2.514586 | 0.048635 | 0.165474 | -4.41863 |
| CCR3      | 1.107778 | 3.988567 | 2.512361 | 0.048775 | 0.165815 | -4.42165 |
| GOLGA7B   | 1.266718 | 2.89401  | 2.501889 | 0.049443 | 0.167308 | -4.43588 |

Table S3. significant different expression of lncRNA after hypoxia treatment compared to controls.

| Gene              | logFC    | AveExpr  | t        | P.Value  | adj.P.Val | B        |
|-------------------|----------|----------|----------|----------|-----------|----------|
| NONHSAT169401.1   | 3.385126 | 8.749768 | 31.64504 | 2.01E-07 | 0.010746  | 5.391117 |
| lnc-ZFP42-13:1    | 4.239886 | 3.183658 | 30.6738  | 2.39E-07 | 0.010746  | 5.347319 |
| ENST00000554254.1 | 3.506397 | 11.3501  | 29.0718  | 3.20E-07 | 0.010746  | 5.266895 |
| lnc-TMEM30B-6:1   | 3.4897   | 8.14294  | 27.23594 | 4.56E-07 | 0.011503  | 5.160025 |
| lnc-NDRG1-1:1     | 2.665422 | 14.16377 | 26.1066  | 5.75E-07 | 0.011591  | 5.085045 |
| NONHSAT164393.1   | 2.894341 | 7.794281 | 23.38107 | 1.05E-06 | 0.017605  | 4.867882 |
| NONHSAT207308.1   | 2.811383 | 7.586095 | 20.83091 | 1.96E-06 | 0.023413  | 4.604351 |
| lnc-EMB-10:1      | -2.52947 | 2.368854 | -20.2393 | 2.29E-06 | 0.023413  | 4.532593 |
| MSTRG.72335.13    | 2.509028 | 6.86993  | 20.14872 | 2.35E-06 | 0.023413  | 4.521207 |
| ENST00000435984.1 | 3.589056 | 2.905821 | 20.1391  | 2.36E-06 | 0.023413  | 4.51999  |
| NONHSAT199820.1   | -2.16909 | 2.485435 | -19.8422 | 2.55E-06 | 0.023413  | 4.481825 |
| NONHSAT176902.1   | 2.208677 | 11.35296 | 19.34536 | 2.93E-06 | 0.024359  | 4.415152 |
| NR_119376         | 2.999875 | 10.4005  | 19.09962 | 3.14E-06 | 0.024359  | 4.380811 |
| lnc-DLX2-4:17     | 2.399449 | 9.446251 | 18.59119 | 3.63E-06 | 0.026177  | 4.306729 |
| ENST00000500447.1 | 2.206166 | 9.987725 | 17.88737 | 4.48E-06 | 0.029439  | 4.19696  |
| lnc-TMEM30B-9:1   | 2.468019 | 7.028313 | 17.63648 | 4.83E-06 | 0.029439  | 4.155662 |
| LINC01606:17      | 1.929067 | 9.543196 | 17.42933 | 5.15E-06 | 0.029439  | 4.120657 |
| ENST00000423942.1 | 2.083009 | 2.218274 | 16.95337 | 5.98E-06 | 0.029439  | 4.036982 |
| lnc-DCP1A-2:1     | -1.84601 | 1.99765  | -16.9445 | 6.00E-06 | 0.029439  | 4.035375 |
| MSTRG.71710.1     | 2.141711 | 8.154212 | 16.89304 | 6.10E-06 | 0.029439  | 4.02604  |
| T105619           | 3.195992 | 6.957088 | 16.79867 | 6.29E-06 | 0.029439  | 4.00877  |
| lnc-ANKRD45-1:1   | 6.600498 | 4.899349 | 16.65819 | 6.58E-06 | 0.029439  | 3.982703 |
| lnc-SUSD1-7:3     | 2.691221 | 8.612615 | 16.42924 | 7.09E-06 | 0.029439  | 3.939288 |
| lnc-TNFSF9-1:1    | -1.74015 | 3.066328 | -16.3241 | 7.34E-06 | 0.029439  | 3.918945 |
| MSTRG.64854.3     | 2.623706 | 5.966334 | 16.28452 | 7.43E-06 | 0.029439  | 3.911231 |
| NONHSAT205166.1   | 2.138153 | 2.144748 | 16.19667 | 7.65E-06 | 0.029439  | 3.893962 |
| NONHSAT223579.1   | 1.699963 | 6.938563 | 16.10815 | 7.88E-06 | 0.029439  | 3.876379 |
| NONHSAT169400.1   | 3.068961 | 8.331057 | 15.91296 | 8.42E-06 | 0.029795  | 3.83694  |
| NONHSAT203600.1   | 2.240486 | 2.60194  | 15.86048 | 8.57E-06 | 0.029795  | 3.826177 |
| ENST00000414769.2 | 1.701862 | 10.34493 | 15.68952 | 9.08E-06 | 0.030107  | 3.790644 |
| lnc-ELMOD3-1:1    | 2.867022 | 2.467577 | 15.63491 | 9.26E-06 | 0.030107  | 3.779137 |
| ENST00000575331.1 | 1.954994 | 5.076501 | 15.52474 | 9.62E-06 | 0.030297  | 3.755692 |
| lnc-ERMP1-5:1     | 1.683474 | 10.14397 | 15.41397 | 9.99E-06 | 0.030533  | 3.731799 |
| lnc-ZNF730-2:1    | 2.337201 | 2.402761 | 14.66389 | 1.31E-05 | 0.036651  | 3.561194 |
| NONHSAT193198.1   | 1.952886 | 2.159728 | 14.57678 | 1.35E-05 | 0.036651  | 3.540337 |

|                   |          |          |          |          |          |          |
|-------------------|----------|----------|----------|----------|----------|----------|
| lnc-ERRFI1-1:2    | 2.412136 | 5.264809 | 14.50805 | 1.38E-05 | 0.036651 | 3.523718 |
| MSTRG.32096.87    | 1.914008 | 7.09918  | 14.49794 | 1.39E-05 | 0.036651 | 3.521261 |
| MSTRG.42620.1     | 1.876669 | 1.984239 | 14.47084 | 1.40E-05 | 0.036651 | 3.514663 |
| MSTRG.18225.2     | 1.615691 | 6.096783 | 14.44254 | 1.42E-05 | 0.036651 | 3.507745 |
| ENST00000526906.1 | 2.102713 | 4.345403 | 14.22969 | 1.54E-05 | 0.037102 | 3.454936 |
| lnc-FLRT2-10:2    | -1.58351 | 2.016866 | -14.1969 | 1.55E-05 | 0.037102 | 3.446683 |
| T203949           | 1.382111 | 1.800344 | 14.18333 | 1.56E-05 | 0.037102 | 3.443245 |
| lnc-ACSL6-1:1     | 1.381177 | 13.80033 | 14.13887 | 1.59E-05 | 0.037102 | 3.431967 |
| MSTRG.13771.4     | 1.795194 | 1.984356 | 14.05616 | 1.64E-05 | 0.037102 | 3.410822 |
| lnc-ZNF680-12:1   | 1.693985 | 2.21322  | 13.97469 | 1.69E-05 | 0.037102 | 3.389774 |
| lnc-CCDC39-1:3    | 1.891    | 5.679224 | 13.92857 | 1.72E-05 | 0.037102 | 3.377764 |
| NONHSAT205212.1   | -1.64695 | 3.313277 | -13.8906 | 1.75E-05 | 0.037102 | 3.367816 |
| lnc-SMPX-6:1      | 1.949936 | 2.064336 | 13.86207 | 1.77E-05 | 0.037102 | 3.360319 |
| lnc-LSMEM1-2:1    | 1.999148 | 2.176688 | 13.79179 | 1.81E-05 | 0.037304 | 3.341724 |
| NONHSAT221185.1   | 2.273695 | 4.912055 | 13.73721 | 1.85E-05 | 0.037304 | 3.327166 |
| NONHSAT151071.1   | 2.138729 | 7.274719 | 13.69202 | 1.89E-05 | 0.037304 | 3.315038 |
| NONHSAT211760.1   | 2.331415 | 4.485163 | 13.64004 | 1.93E-05 | 0.037339 | 3.300996 |
| lnc-KLHL1-11:1    | -2.42501 | 2.265529 | -13.5582 | 1.99E-05 | 0.0378   | 3.278704 |
| ENST00000417539.1 | 2.223755 | 6.213617 | 13.46374 | 2.06E-05 | 0.0378   | 3.252679 |
| ENST00000566733.2 | 1.497557 | 7.749182 | 13.44304 | 2.08E-05 | 0.0378   | 3.246933 |
| MSTRG.12643.4     | -1.61403 | 1.948225 | -13.4215 | 2.10E-05 | 0.0378   | 3.240943 |
| lnc-PLOD2-4:1     | 2.000494 | 8.529442 | 13.26917 | 2.23E-05 | 0.038787 | 3.198065 |
| lnc-ADTRP-7:4     | 1.838051 | 6.897614 | 13.23794 | 2.26E-05 | 0.038787 | 3.18917  |
| lnc-LYSMD3-2:5    | 1.884088 | 9.07316  | 13.22709 | 2.27E-05 | 0.038787 | 3.186072 |
| MSTRG.19670.1     | 1.515215 | 1.797923 | 13.09952 | 2.39E-05 | 0.040167 | 3.149313 |
| T118234           | -1.81491 | 3.749327 | -13.0369 | 2.45E-05 | 0.040532 | 3.131036 |
| NONHSAT216919.1   | -1.33757 | 1.843826 | -12.9698 | 2.52E-05 | 0.040991 | 3.111316 |
| NONHSAT207426.1   | 1.818031 | 2.007447 | 12.86871 | 2.63E-05 | 0.04179  | 3.081232 |
| lnc-SLC15A4-25:1  | 2.437806 | 2.324355 | 12.84634 | 2.65E-05 | 0.04179  | 3.074524 |
| lnc-CYP7A1-9:1    | 1.383205 | 1.767122 | 12.7796  | 2.73E-05 | 0.041797 | 3.054395 |
| lnc-C2orf74-4:1   | 1.447643 | 13.85538 | 12.73655 | 2.78E-05 | 0.041797 | 3.041315 |
| MSTRG.28235.1     | -1.47329 | 7.907366 | -12.736  | 2.78E-05 | 0.041797 | 3.041155 |
| lnc-ARL4A-3:1     | -1.78137 | 3.69673  | -12.4646 | 3.11E-05 | 0.044389 | 2.956975 |
| NONHSAT173357.1   | 2.451199 | 5.173184 | 12.42546 | 3.17E-05 | 0.044389 | 2.94457  |
| ENST00000454444.1 | 2.204575 | 5.031175 | 12.406   | 3.19E-05 | 0.044389 | 2.938383 |
| MSTRG.35148.1     | 1.436885 | 1.973669 | 12.39429 | 3.21E-05 | 0.044389 | 2.934654 |
| ENST00000438659.2 | 1.553407 | 1.844871 | 12.39222 | 3.21E-05 | 0.044389 | 2.933994 |
| MSTRG.19441.1     | -2.58539 | 2.758552 | -12.3918 | 3.21E-05 | 0.044389 | 2.93386  |
| lnc-FYB1-1:2      | -1.86483 | 2.060094 | -12.3324 | 3.30E-05 | 0.044401 | 2.914848 |
| ENST00000561295.4 | 1.563872 | 1.845409 | 12.30274 | 3.34E-05 | 0.044401 | 2.905295 |
| lnc-SLC2A14-2:1   | 1.37554  | 12.51933 | 12.27787 | 3.38E-05 | 0.044401 | 2.897259 |
| NONHSAT188155.1   | -1.67124 | 1.960524 | -12.2595 | 3.40E-05 | 0.044401 | 2.891293 |
| lnc-ADGRD1-3:1    | 2.159217 | 2.192538 | 12.23784 | 3.43E-05 | 0.044401 | 2.884268 |
| NONHSAT167733.1   | 2.108993 | 2.166463 | 12.13381 | 3.59E-05 | 0.045204 | 2.850176 |
| ENST00000665254.1 | -2.06985 | 2.415472 | -12.1338 | 3.59E-05 | 0.045204 | 2.850171 |
| LINC01811:26      | 1.620877 | 7.61744  | 12.11038 | 3.63E-05 | 0.045204 | 2.842431 |
| NR_026706         | -2.33875 | 2.247882 | -11.9389 | 3.92E-05 | 0.047101 | 2.785016 |
| lnc-FAM13C-5:1    | 2.300352 | 2.207027 | 11.92245 | 3.95E-05 | 0.047101 | 2.779432 |

|                   |          |          |          |          |          |          |
|-------------------|----------|----------|----------|----------|----------|----------|
| lnc-SNTG1-9:1     | -1.42112 | 5.149614 | -11.9152 | 3.96E-05 | 0.047101 | 2.776975 |
| ENST00000567966.1 | 1.836429 | 2.011367 | 11.90845 | 3.97E-05 | 0.047101 | 2.774676 |
| ENST00000522028.1 | 1.621311 | 2.008302 | 11.86732 | 4.04E-05 | 0.047417 | 2.760648 |
| NONHSAT224142.1   | -1.54219 | 6.300722 | -11.7561 | 4.25E-05 | 0.049272 | 2.722341 |
| lnc-XKR5-3:1      | 1.488846 | 9.058674 | 11.72479 | 4.31E-05 | 0.049359 | 2.711431 |
| DIRC3-AS1:11      | 1.572639 | 4.499535 | 11.70201 | 4.36E-05 | 0.049359 | 2.703477 |
| NONHSAT214644.1   | 1.576467 | 1.895388 | 11.65002 | 4.46E-05 | 0.049976 | 2.685229 |
| lnc-ZNF669-1:1    | 1.382797 | 1.784581 | 11.56069 | 4.65E-05 | 0.051087 | 2.653579 |
| lnc-SEL1L3-4:1    | -1.33132 | 7.930899 | -11.5199 | 4.73E-05 | 0.051087 | 2.638997 |
| NONHSAT164791.1   | -1.78489 | 2.825476 | -11.4838 | 4.81E-05 | 0.051087 | 2.626032 |
| lnc-DCAF12L2-2:1  | -1.46162 | 6.405532 | -11.4814 | 4.82E-05 | 0.051087 | 2.625141 |
| lnc-WRNIP1-34:2   | 1.642791 | 1.889444 | 11.42884 | 4.94E-05 | 0.051087 | 2.606149 |
| lnc-CERS4-3:1     | -1.61509 | 2.042108 | -11.4124 | 4.98E-05 | 0.051087 | 2.600164 |
| NONHSAT167217.1   | -1.67626 | 2.039453 | -11.4056 | 4.99E-05 | 0.051087 | 2.597711 |
| T273532           | 1.159687 | 1.676194 | 11.40361 | 5.00E-05 | 0.051087 | 2.596978 |
| MSTRG.55402.1     | -1.50691 | 4.218918 | -11.3779 | 5.06E-05 | 0.051087 | 2.587601 |
| lnc-ADGRV1-8:1    | 1.939478 | 6.784161 | 11.32983 | 5.17E-05 | 0.051087 | 2.569971 |
| lnc-WASHC5-11:3   | 2.141746 | 2.481096 | 11.27765 | 5.30E-05 | 0.051087 | 2.550707 |
| lnc-ZSWIM2-6:5    | -1.56801 | 3.257526 | -11.2683 | 5.32E-05 | 0.051087 | 2.547245 |
| lnc-SPATA31A6-4:1 | -1.19796 | 3.151868 | -11.2629 | 5.33E-05 | 0.051087 | 2.545247 |
| ENST00000445174.5 | 1.167634 | 12.84619 | 11.24527 | 5.38E-05 | 0.051087 | 2.53868  |
| lnc-MYOF-3:1      | -1.39521 | 6.29811  | -11.2408 | 5.39E-05 | 0.051087 | 2.537018 |
| T379934           | 2.474162 | 2.640527 | 11.19037 | 5.52E-05 | 0.051087 | 2.518171 |
| ENST00000608775.1 | 1.424469 | 7.256506 | 11.18726 | 5.53E-05 | 0.051087 | 2.517003 |
| lnc-CCDC38-7:1    | 1.171574 | 10.56158 | 11.1564  | 5.61E-05 | 0.051087 | 2.505403 |
| ENST00000656747.1 | 1.169799 | 9.216324 | 11.152   | 5.62E-05 | 0.051087 | 2.503746 |
| NONHSAT186902.1   | 2.295144 | 2.370188 | 11.10979 | 5.74E-05 | 0.051087 | 2.487785 |
| lnc-KLF6-12:3     | 2.433022 | 2.476319 | 11.10634 | 5.74E-05 | 0.051087 | 2.486478 |
| lnc-THSD7A-8:1    | -1.56445 | 2.826412 | -11.1021 | 5.76E-05 | 0.051087 | 2.484875 |
| ENST00000625043.1 | 2.07187  | 5.756727 | 11.09398 | 5.78E-05 | 0.051087 | 2.481784 |
| ENST00000557733.1 | 1.161881 | 6.175272 | 11.06302 | 5.86E-05 | 0.051087 | 2.469995 |
| lnc-TEX2-1:1      | 1.83323  | 1.979728 | 11.04022 | 5.93E-05 | 0.051087 | 2.46128  |
| LUCAT1:14         | 2.548327 | 5.456195 | 11.02866 | 5.96E-05 | 0.051087 | 2.456851 |
| lnc-EDEM3-7:3     | 1.454854 | 7.313952 | 11.02068 | 5.98E-05 | 0.051087 | 2.453789 |
| ENST00000428335.1 | -2.14148 | 2.391653 | -11.0143 | 6.00E-05 | 0.051087 | 2.451342 |
| lnc-EXTL3-7:1     | -1.43105 | 1.827103 | -10.9884 | 6.08E-05 | 0.051087 | 2.441383 |
| NONHSAT187468.1   | 1.450289 | 1.789734 | 10.97955 | 6.10E-05 | 0.051087 | 2.437954 |
| lnc-ABCG5-3:1     | 1.750118 | 1.985067 | 10.97045 | 6.13E-05 | 0.051087 | 2.434439 |
| ENST00000339037.4 | 1.15386  | 12.6281  | 10.95202 | 6.19E-05 | 0.05112  | 2.427305 |
| lnc-TRIO-1:3      | 1.489674 | 7.47941  | 10.92244 | 6.27E-05 | 0.051433 | 2.41582  |
| NONHSAT171432.1   | 1.416245 | 11.72569 | 10.89307 | 6.36E-05 | 0.051749 | 2.404366 |
| NONHSAT172926.1   | 1.457971 | 2.530844 | 10.87025 | 6.43E-05 | 0.051906 | 2.395438 |
| ENST00000665013.1 | 1.623082 | 7.638839 | 10.81058 | 6.62E-05 | 0.052851 | 2.37195  |
| ENST00000670284.1 | -1.96784 | 2.288065 | -10.7781 | 6.73E-05 | 0.052851 | 2.359097 |
| NONHSAT149210.1   | 1.507067 | 2.59875  | 10.77729 | 6.73E-05 | 0.052851 | 2.358763 |
| MSTRG.5865.1      | -1.43584 | 3.648265 | -10.7686 | 6.76E-05 | 0.052851 | 2.355305 |
| ENST00000419889.1 | -1.22401 | 3.317419 | -10.7395 | 6.86E-05 | 0.053198 | 2.343712 |
| NONHSAT205252.1   | 1.714521 | 1.879607 | 10.6977  | 7.00E-05 | 0.053472 | 2.326986 |

|                   |          |          |          |          |          |          |
|-------------------|----------|----------|----------|----------|----------|----------|
| ENST00000663862.1 | -1.75294 | 4.905028 | -10.683  | 7.05E-05 | 0.053472 | 2.321067 |
| ENST00000633779.1 | -1.67271 | 2.020731 | -10.6827 | 7.05E-05 | 0.053472 | 2.320953 |
| ENST00000416909.1 | -1.92365 | 2.217932 | -10.6415 | 7.20E-05 | 0.053793 | 2.304355 |
| lnc-MLXIP-1:1     | 1.237569 | 8.221728 | 10.64032 | 7.20E-05 | 0.053793 | 2.303859 |
| NR_110223         | -1.39703 | 5.223138 | -10.5868 | 7.40E-05 | 0.05427  | 2.282102 |
| MSTRG.64493.1     | 1.472865 | 1.907211 | 10.58625 | 7.40E-05 | 0.05427  | 2.281895 |
| ENST00000668962.1 | 1.549125 | 6.641342 | 10.56383 | 7.48E-05 | 0.05427  | 2.272734 |
| lnc-NDRG2-7:1     | -1.74779 | 1.988018 | -10.5638 | 7.48E-05 | 0.05427  | 2.272707 |
| NONHSAT177958.1   | 1.379125 | 1.760026 | 10.49295 | 7.75E-05 | 0.055656 | 2.243599 |
| NONHSAT201592.1   | 1.184047 | 1.71896  | 10.48476 | 7.78E-05 | 0.055656 | 2.240213 |
| lnc-ZNF680-14:1   | 1.079367 | 9.132593 | 10.43762 | 7.97E-05 | 0.055987 | 2.220647 |
| ENST00000615349.1 | -1.20246 | 8.701239 | -10.4317 | 7.99E-05 | 0.055987 | 2.218201 |
| MSTRG.44248.1     | 1.363052 | 8.059717 | 10.40551 | 8.10E-05 | 0.055987 | 2.207246 |
| lnc-HTR1B-2:7     | 1.440608 | 6.067469 | 10.4051  | 8.10E-05 | 0.055987 | 2.207077 |
| lnc-TCIM-4:1      | -1.69067 | 2.451164 | -10.4037 | 8.11E-05 | 0.055987 | 2.206511 |
| NONHSAT181690.1   | 1.385946 | 1.77923  | 10.37014 | 8.25E-05 | 0.05599  | 2.192416 |
| ENST00000567714.1 | 1.744161 | 8.567219 | 10.36439 | 8.27E-05 | 0.05599  | 2.189998 |
| ENST00000432230.6 | 2.979175 | 2.86938  | 10.33492 | 8.39E-05 | 0.05599  | 2.177575 |
| lnc-ACSL1-4:1     | 1.609528 | 1.909164 | 10.33038 | 8.41E-05 | 0.05599  | 2.175657 |
| lnc-CENPP-14:1    | -1.15893 | 5.942772 | -10.3281 | 8.42E-05 | 0.05599  | 2.174696 |
| lnc-PRDM13-9:1    | 1.033148 | 9.843964 | 10.32235 | 8.45E-05 | 0.05599  | 2.172262 |
| NONHSAT213552.1   | 1.494312 | 1.914304 | 10.30055 | 8.54E-05 | 0.05599  | 2.163022 |
| lnc-FYTTD1-8:4    | -1.9258  | 4.221903 | -10.2876 | 8.60E-05 | 0.05599  | 2.157527 |
| ENST00000485473.1 | 1.800413 | 7.121982 | 10.2859  | 8.61E-05 | 0.05599  | 2.156795 |
| ENST00000450443.1 | 1.434128 | 9.38344  | 10.22339 | 8.89E-05 | 0.056295 | 2.130087 |
| T285881           | 3.523575 | 3.182184 | 10.22338 | 8.89E-05 | 0.056295 | 2.130083 |
| MIR503HG:17       | 1.47937  | 6.00881  | 10.21578 | 8.92E-05 | 0.056295 | 2.126819 |
| NONHSAT185724.1   | 1.312149 | 1.855077 | 10.2139  | 8.93E-05 | 0.056295 | 2.126011 |
| lnc-TMEM268-3:1   | 1.176173 | 1.701235 | 10.18547 | 9.06E-05 | 0.056295 | 2.113769 |
| NONHSAT195834.1   | -1.0422  | 8.031084 | -10.1836 | 9.07E-05 | 0.056295 | 2.112965 |
| T006816           | 1.801282 | 2.002481 | 10.17915 | 9.09E-05 | 0.056295 | 2.11104  |
| NONHSAT154126.1   | -1.18436 | 8.229173 | -10.1772 | 9.10E-05 | 0.056295 | 2.110202 |
| lnc-ALG10-4:1     | -1.11324 | 8.617555 | -10.1652 | 9.16E-05 | 0.056298 | 2.105025 |
| NONHSAT195317.1   | -1.47245 | 5.646659 | -10.1364 | 9.29E-05 | 0.056441 | 2.092528 |
| NONHSAT183657.1   | 1.51988  | 2.079577 | 10.13445 | 9.30E-05 | 0.056441 | 2.091678 |
| NONHSAT190719.1   | 1.011398 | 7.927458 | 10.11297 | 9.41E-05 | 0.056441 | 2.082325 |
| NONHSAT190319.1   | 1.493353 | 1.795306 | 10.10373 | 9.45E-05 | 0.056441 | 2.078294 |
| T288823           | 1.072423 | 10.22029 | 10.09245 | 9.51E-05 | 0.056441 | 2.073368 |
| NONHSAT208275.1   | 1.395094 | 5.106222 | 10.08689 | 9.54E-05 | 0.056441 | 2.070935 |
| MSTRG.59967.1     | -1.82712 | 2.656438 | -10.0797 | 9.57E-05 | 0.056441 | 2.067784 |
| lnc-TMEM14A-1:3   | 1.131658 | 6.989113 | 10.06453 | 9.65E-05 | 0.056557 | 2.061136 |
| T376410           | 1.579148 | 5.724197 | 10.04137 | 9.76E-05 | 0.056754 | 2.050955 |
| MSTRG.65423.3     | 2.001875 | 9.433927 | 10.01068 | 9.92E-05 | 0.056754 | 2.037411 |
| lnc-HSD17B2-1:4   | -1.57398 | 3.184429 | -10.0064 | 9.94E-05 | 0.056754 | 2.035523 |
| ENST00000660983.1 | 1.009914 | 7.320945 | 10.00377 | 9.96E-05 | 0.056754 | 2.034352 |
| lnc-RNASE11-1:1   | -1.3776  | 9.560812 | -9.99807 | 9.99E-05 | 0.056754 | 2.031827 |
| NR_026850         | 1.052832 | 11.21156 | 9.992252 | 0.0001   | 0.056754 | 2.029247 |
| MSTRG.37408.2     | 1.897786 | 5.556845 | 9.966838 | 0.000102 | 0.05689  | 2.017956 |

|                   |          |          |          |          |          |          |
|-------------------|----------|----------|----------|----------|----------|----------|
| lnc-RBMX-6:1      | -1.7316  | 1.984444 | -9.9664  | 0.000102 | 0.05689  | 2.017761 |
| NONHSAT178170.1   | 1.003801 | 12.39492 | 9.938952 | 0.000103 | 0.057201 | 2.005519 |
| MSTRG.16372.1     | 1.56785  | 1.929874 | 9.928206 | 0.000104 | 0.057201 | 2.000713 |
| ENST00000431293.2 | 1.974787 | 5.939624 | 9.924508 | 0.000104 | 0.057201 | 1.999058 |
| ENST00000607047.1 | -1.06294 | 9.34261  | -9.91433 | 0.000104 | 0.057201 | 1.994498 |
| lnc-POC5-3:1      | -1.26655 | 8.381891 | -9.86266 | 0.000107 | 0.058202 | 1.97124  |
| lnc-BMPER-6:1     | -1.24182 | 6.822127 | -9.85489 | 0.000108 | 0.058202 | 1.967729 |
| MSTRG.3164.1      | -1.17974 | 5.751404 | -9.83837 | 0.000109 | 0.058202 | 1.960245 |
| ENST00000490375.1 | 1.481731 | 9.640331 | 9.827544 | 0.000109 | 0.058202 | 1.955334 |
| ENST00000483262.1 | 1.372244 | 5.715399 | 9.810078 | 0.00011  | 0.058202 | 1.947394 |
| lnc-SPARCL1-4:1   | -1.09917 | 5.393044 | -9.80284 | 0.000111 | 0.058202 | 1.9441   |
| NONHSAT218479.1   | 1.569705 | 2.003974 | 9.801438 | 0.000111 | 0.058202 | 1.943459 |
| lnc-NCAM2-12:1    | -1.74896 | 2.10691  | -9.77397 | 0.000112 | 0.058757 | 1.930913 |
| NONHSAT163833.1   | -1.55603 | 2.637891 | -9.75013 | 0.000114 | 0.058991 | 1.919986 |
| ENST00000455967.1 | -1.11207 | 4.05816  | -9.74729 | 0.000114 | 0.058991 | 1.918684 |
| lnc-GMPS-4:1      | -1.23211 | 6.058312 | -9.73161 | 0.000115 | 0.059186 | 1.911473 |
| ENST00000442442.1 | 1.29551  | 1.746089 | 9.717698 | 0.000116 | 0.059327 | 1.905063 |
| NONHSAT165231.1   | 1.527177 | 2.131755 | 9.686102 | 0.000118 | 0.059818 | 1.890455 |
| MSTRG.31397.1     | 1.456356 | 1.865925 | 9.678918 | 0.000118 | 0.059818 | 1.887124 |
| ENST00000606622.1 | -1.40714 | 1.891721 | -9.64965 | 0.00012  | 0.059818 | 1.873517 |
| lnc-CPNE1-2:1     | 2.059764 | 4.517651 | 9.641532 | 0.000121 | 0.059818 | 1.869735 |
| lnc-HRASLS5-2:1   | -1.35049 | 8.262739 | -9.63917 | 0.000121 | 0.059818 | 1.868635 |
| lnc-BPY2-5:1      | -1.19433 | 3.599703 | -9.6302  | 0.000122 | 0.059818 | 1.864445 |
| NONHSAT195038.1   | 1.107285 | 1.667123 | 9.627303 | 0.000122 | 0.059818 | 1.863093 |
| lnc-NSFL1C-1:1    | 1.179583 | 4.971408 | 9.62691  | 0.000122 | 0.059818 | 1.862909 |
| NR_033972         | 1.232819 | 7.344923 | 9.619727 | 0.000122 | 0.059818 | 1.85955  |
| NONHSAT154564.1   | -1.35189 | 1.968172 | -9.59731 | 0.000124 | 0.060001 | 1.849046 |
| ENST00000585189.1 | 2.034221 | 4.339076 | 9.587992 | 0.000124 | 0.060001 | 1.844669 |
| ENST00000450800.1 | 1.037591 | 1.596912 | 9.587508 | 0.000124 | 0.060001 | 1.844441 |
| NONHSAT211935.1   | 1.283021 | 1.840055 | 9.544627 | 0.000127 | 0.061111 | 1.824224 |
| NONHSAT163300.1   | -1.90459 | 5.131295 | -9.52745 | 0.000129 | 0.061111 | 1.81609  |
| NONHSAT172103.1   | 2.245474 | 2.143324 | 9.521214 | 0.000129 | 0.061111 | 1.813132 |
| lnc-OLFML3-4:1    | 2.087382 | 2.369737 | 9.516069 | 0.000129 | 0.061111 | 1.81069  |
| ENST00000455974.1 | 1.6507   | 7.728536 | 9.507285 | 0.00013  | 0.061111 | 1.806516 |
| NONHSAT181351.1   | 1.129812 | 8.787812 | 9.502166 | 0.00013  | 0.061111 | 1.804081 |
| lnc-FZD8-3:1      | 1.488546 | 2.05417  | 9.463884 | 0.000133 | 0.061861 | 1.785813 |
| NONHSAT205189.1   | -1.06254 | 1.608765 | -9.44636 | 0.000134 | 0.061861 | 1.777419 |
| ENST00000511867.1 | -1.01927 | 1.655647 | -9.43611 | 0.000135 | 0.061861 | 1.772497 |
| T073019           | 3.516486 | 3.435794 | 9.430282 | 0.000136 | 0.061861 | 1.769695 |
| lnc-USP44-2:1     | 1.162296 | 10.15818 | 9.428009 | 0.000136 | 0.061861 | 1.768602 |
| NONHSAT206327.1   | 1.55874  | 5.646561 | 9.419282 | 0.000136 | 0.061861 | 1.764401 |
| MSTRG.39833.2     | -1.12995 | 7.489377 | -9.41373 | 0.000137 | 0.061861 | 1.761726 |
| lnc-PXDC1-15:6    | 1.459411 | 7.569173 | 9.404723 | 0.000137 | 0.061893 | 1.757382 |
| ENST00000515728.1 | 1.174242 | 3.554642 | 9.383067 | 0.000139 | 0.061906 | 1.746914 |
| NONHSAT187991.1   | -1.4778  | 1.86914  | -9.36748 | 0.00014  | 0.061906 | 1.739356 |
| lnc-HNRNPU-8:1    | -1.0988  | 10.33189 | -9.36626 | 0.00014  | 0.061906 | 1.738764 |
| NONHSAT196380.1   | -2.77922 | 3.346385 | -9.36601 | 0.00014  | 0.061906 | 1.738644 |
| lnc-NPFFR2-2:2    | -1.12062 | 9.219469 | -9.35573 | 0.000141 | 0.061906 | 1.733653 |

|                    |          |          |          |          |          |          |
|--------------------|----------|----------|----------|----------|----------|----------|
| NONHSAT217842.1    | 1.381435 | 1.867265 | 9.323385 | 0.000144 | 0.061906 | 1.717892 |
| NONHSAT199539.1    | 2.089954 | 2.365972 | 9.30485  | 0.000145 | 0.061906 | 1.708828 |
| lnc-MICAL2-1:4     | 1.304949 | 7.706686 | 9.291621 | 0.000146 | 0.061906 | 1.702343 |
| lnc-ANKRD42-5:1    | -1.49494 | 4.728624 | -9.28894 | 0.000147 | 0.061906 | 1.701027 |
| NONHSAT185991.1    | 1.495765 | 1.942804 | 9.283559 | 0.000147 | 0.061906 | 1.698385 |
| lnc-ATXN7-14:1     | 1.813658 | 3.84389  | 9.270355 | 0.000148 | 0.061906 | 1.691893 |
| lnc-BEGAIN-3:1     | 2.145942 | 2.090605 | 9.263361 | 0.000149 | 0.061906 | 1.688449 |
| ENST00000624102.1  | -1.45309 | 6.69888  | -9.26108 | 0.000149 | 0.061906 | 1.687324 |
| MSTRG.33020.1      | 1.315028 | 4.047195 | 9.252156 | 0.00015  | 0.061906 | 1.682924 |
| ENST00000437764.5  | 1.093291 | 11.48909 | 9.248781 | 0.00015  | 0.061906 | 1.681258 |
| lnc-ST6GALNAC2-1:1 | 1.870217 | 2.029618 | 9.246185 | 0.00015  | 0.061906 | 1.679976 |
| NONHSAT189471.1    | 1.447462 | 1.764647 | 9.229686 | 0.000152 | 0.061906 | 1.671817 |
| ENST00000664141.1  | -1.6936  | 3.205841 | -9.21636 | 0.000153 | 0.061906 | 1.665215 |
| lnc-PIGM-4:1       | 1.347802 | 2.236199 | 9.213855 | 0.000153 | 0.061906 | 1.66397  |
| NR_015421          | 1.107202 | 8.312133 | 9.212553 | 0.000153 | 0.061906 | 1.663324 |
| lnc-PITRM1-2:8     | 1.045829 | 4.362114 | 9.204923 | 0.000154 | 0.061906 | 1.659534 |
| lnc-PRSS16-1:1     | -1.18254 | 5.172584 | -9.20308 | 0.000154 | 0.061906 | 1.658617 |
| ENST00000512406.5  | 1.236721 | 1.745881 | 9.197951 | 0.000154 | 0.061906 | 1.656068 |
| LINC01638:16       | 2.184171 | 3.546558 | 9.197836 | 0.000154 | 0.061906 | 1.656011 |
| ENST00000662762.1  | -1.164   | 6.48583  | -9.18326 | 0.000156 | 0.061906 | 1.648754 |
| NONHSAT169246.1    | 1.324701 | 2.037405 | 9.178223 | 0.000156 | 0.061906 | 1.646241 |
| TMEM147-AS1:8      | -1.13865 | 9.474526 | -9.17078 | 0.000157 | 0.061906 | 1.642526 |
| lnc-MPZL3-4:1      | -1.6116  | 9.541349 | -9.16099 | 0.000158 | 0.061906 | 1.637634 |
| lnc-SP8-5:1        | 1.262284 | 6.97691  | 9.160599 | 0.000158 | 0.061906 | 1.637438 |
| NONHSAT193263.1    | 1.240815 | 1.864801 | 9.159163 | 0.000158 | 0.061906 | 1.63672  |
| NONHSAT205786.1    | 1.982739 | 2.721083 | 9.143079 | 0.000159 | 0.061906 | 1.628664 |
| lnc-UBAP1-6:2      | -1.10415 | 2.28273  | -9.14299 | 0.000159 | 0.061906 | 1.628617 |
| ENST00000527726.1  | 1.238846 | 6.191172 | 9.141771 | 0.000159 | 0.061906 | 1.628008 |
| lnc-SLC2A3-4:1     | 1.778798 | 1.944338 | 9.138655 | 0.00016  | 0.061906 | 1.626445 |
| MSTRG.20529.1      | -1.01397 | 8.257091 | -9.12374 | 0.000161 | 0.062006 | 1.618954 |
| MSTRG.31811.3      | -1.36128 | 2.879392 | -9.12235 | 0.000161 | 0.062006 | 1.618253 |
| lnc-BTBD19-1:1     | 1.041877 | 8.136049 | 9.09873  | 0.000163 | 0.062607 | 1.606354 |
| lnc-MRPL14-4:1     | 2.814253 | 2.444228 | 9.06892  | 0.000166 | 0.06281  | 1.591277 |
| lnc-STBD1-5:2      | -1.47463 | 8.035625 | -9.06008 | 0.000167 | 0.06281  | 1.586794 |
| lnc-CDY1B-13:1     | -1.28897 | 4.648343 | -9.05958 | 0.000167 | 0.06281  | 1.586537 |
| lnc-GBP5-5:1       | 1.541351 | 2.034498 | 9.059506 | 0.000167 | 0.06281  | 1.586501 |
| NONHSAT211369.1    | -1.01703 | 5.823547 | -9.0536  | 0.000168 | 0.06281  | 1.583504 |
| NONHSAT221322.1    | -1.70654 | 2.51824  | -9.04417 | 0.000168 | 0.062917 | 1.578708 |
| NONHSAT193723.1    | 1.619413 | 8.434719 | 9.021981 | 0.000171 | 0.063489 | 1.5674   |
| MSTRG.66702.1      | 1.792722 | 2.10925  | 8.999333 | 0.000173 | 0.06365  | 1.555821 |
| MSTRG.14601.5      | 2.039225 | 2.245126 | 8.988678 | 0.000174 | 0.06365  | 1.55036  |
| NONHSAT176375.1    | 1.446846 | 2.998872 | 8.98445  | 0.000174 | 0.06365  | 1.548191 |
| lnc-LIMS3-2:5      | 1.010749 | 7.60258  | 8.980776 | 0.000175 | 0.06365  | 1.546304 |
| NONHSAT167431.1    | 1.831199 | 2.206503 | 8.968111 | 0.000176 | 0.06365  | 1.539795 |
| NONHSAT221753.1    | 1.238607 | 1.749036 | 8.967102 | 0.000176 | 0.06365  | 1.539276 |
| lnc-SRC-3:1        | -1.10149 | 3.66183  | -8.94658 | 0.000178 | 0.06418  | 1.528698 |
| ENST00000455576.1  | 1.587875 | 1.992821 | 8.937126 | 0.000179 | 0.064303 | 1.523817 |
| lnc-MCM3-3:2       | 2.498624 | 2.505425 | 8.904345 | 0.000183 | 0.065306 | 1.506833 |



|                   |          |          |          |          |          |          |
|-------------------|----------|----------|----------|----------|----------|----------|
| NR_033752         | -1.52776 | 7.571411 | -8.89092 | 0.000184 | 0.065576 | 1.499853 |
| MSTRG.35588.1     | -1.04667 | 6.65138  | -8.88511 | 0.000185 | 0.065576 | 1.49683  |
| lnc-RAB39A-2:1    | -1.90143 | 4.570954 | -8.86442 | 0.000187 | 0.065978 | 1.486039 |
| ENST00000491934.2 | 1.709546 | 7.198127 | 8.862615 | 0.000187 | 0.065978 | 1.485093 |
| NONHSAT209573.1   | 2.208331 | 2.418039 | 8.829816 | 0.000191 | 0.066764 | 1.467912 |
| ENST00000623995.1 | -1.13236 | 7.904707 | -8.82452 | 0.000191 | 0.066764 | 1.465131 |
| SLC7A11-AS1:6     | -1.07919 | 7.173882 | -8.81472 | 0.000192 | 0.066861 | 1.459977 |
| lnc-TTC38-1:1     | 1.317053 | 4.069752 | 8.788353 | 0.000195 | 0.066861 | 1.446073 |
| ENST00000623678.1 | 1.159113 | 8.924593 | 8.775114 | 0.000197 | 0.066861 | 1.439071 |
| NONHSAT224232.1   | 1.050327 | 1.590258 | 8.77298  | 0.000197 | 0.066861 | 1.437941 |
| NR_004384         | -1.17918 | 13.35879 | -8.77172 | 0.000197 | 0.066861 | 1.437274 |
| NONHSAT152008.1   | 1.830413 | 3.214727 | 8.764939 | 0.000198 | 0.066861 | 1.433681 |
| T230587           | 1.185975 | 1.759526 | 8.760862 | 0.000199 | 0.066861 | 1.431519 |
| T163143           | -1.56072 | 2.272954 | -8.7562  | 0.000199 | 0.066861 | 1.429044 |
| T172702           | 1.120726 | 1.63566  | 8.745429 | 0.0002   | 0.066861 | 1.423322 |
| MSTRG.24999.1     | -1.29541 | 5.881398 | -8.74448 | 0.000201 | 0.066861 | 1.422817 |
| T009292           | 2.205088 | 2.275848 | 8.742718 | 0.000201 | 0.066861 | 1.42188  |
| NONHSAT215593.1   | -1.02254 | 5.521949 | -8.74171 | 0.000201 | 0.066861 | 1.421342 |
| ENST00000652227.1 | 1.060071 | 8.040943 | 8.718098 | 0.000204 | 0.067357 | 1.40876  |
| lnc-ADGRV1-2:1    | 1.835187 | 3.560256 | 8.710352 | 0.000205 | 0.067446 | 1.404623 |
| lnc-BTN3A2-1:4    | -1.45236 | 1.908019 | -8.69826 | 0.000206 | 0.067539 | 1.398152 |
| MSTRG.59871.1     | 2.102992 | 2.222659 | 8.68858  | 0.000207 | 0.06766  | 1.392967 |
| NONHSAT212824.1   | 1.328359 | 1.78031  | 8.640497 | 0.000213 | 0.068926 | 1.367091 |
| lnc-NSMCE1-6:1    | 1.854549 | 2.156282 | 8.640428 | 0.000213 | 0.068926 | 1.367053 |
| MSTRG.14961.7     | -1.04012 | 6.624678 | -8.63917 | 0.000214 | 0.068926 | 1.366372 |
| NONHSAT164688.1   | 1.961761 | 2.27978  | 8.63405  | 0.000214 | 0.068926 | 1.363607 |
| MSTRG.63783.1     | -2.10985 | 2.820455 | -8.63055 | 0.000215 | 0.068926 | 1.361715 |
| MSTRG.44418.1     | 1.209927 | 1.648402 | 8.609498 | 0.000217 | 0.069342 | 1.35031  |
| NONHSAT183089.1   | 1.901244 | 5.964434 | 8.607154 | 0.000218 | 0.069342 | 1.349038 |
| ENST00000660762.1 | -1.68209 | 2.239874 | -8.60461 | 0.000218 | 0.069342 | 1.347656 |
| lnc-OR11H1-3:1    | 1.027286 | 11.15256 | 8.59672  | 0.000219 | 0.069452 | 1.34337  |
| lnc-UHRF1BP1L-4:1 | 1.962189 | 2.296992 | 8.565669 | 0.000223 | 0.069932 | 1.326451 |
| MSTRG.26947.1     | 2.254551 | 2.202358 | 8.564871 | 0.000223 | 0.069932 | 1.326015 |
| MSTRG.68207.1     | 1.254519 | 6.154853 | 8.564188 | 0.000223 | 0.069932 | 1.325643 |
| lnc-ALDH9A1-3:2   | -1.35995 | 2.644588 | -8.55695 | 0.000224 | 0.069932 | 1.321686 |
| NONHSAT179128.1   | -1.1499  | 10.08924 | -8.55445 | 0.000225 | 0.069932 | 1.320322 |
| NONHSAT163249.1   | 1.674235 | 4.324947 | 8.553618 | 0.000225 | 0.069932 | 1.319864 |
| NONHSAT195938.1   | -1.04929 | 1.588025 | -8.53413 | 0.000227 | 0.069932 | 1.309184 |
| lnc-ALDH3B2-2:1   | -1.44675 | 4.648861 | -8.52239 | 0.000229 | 0.069932 | 1.302736 |
| LINC01234:6       | -1.16537 | 7.169994 | -8.51743 | 0.00023  | 0.069932 | 1.300012 |
| lnc-KCNS3-3:4     | 1.146596 | 6.671245 | 8.517342 | 0.00023  | 0.069932 | 1.299962 |
| lnc-FMR1-3:1      | -1.37668 | 10.19833 | -8.50971 | 0.000231 | 0.069932 | 1.295759 |
| ENST00000668970.1 | 1.439525 | 6.547731 | 8.503744 | 0.000232 | 0.069932 | 1.292475 |
| NONHSAT221803.1   | 1.570445 | 1.964472 | 8.501996 | 0.000232 | 0.069932 | 1.291511 |
| NONHSAT188005.1   | -1.52052 | 5.586582 | -8.4969  | 0.000233 | 0.069932 | 1.2887   |
| lnc-SLC25A51-4:2  | 1.587886 | 7.035218 | 8.493998 | 0.000233 | 0.069932 | 1.287098 |
| lnc-DPH1-3:1      | -1.10469 | 1.58434  | -8.47534 | 0.000236 | 0.070154 | 1.276783 |
| NONHSAT206058.1   | 1.334471 | 1.738681 | 8.466815 | 0.000237 | 0.070259 | 1.272062 |

|                   |          |          |          |          |          |          |
|-------------------|----------|----------|----------|----------|----------|----------|
| T357080           | 1.554607 | 2.168049 | 8.453053 | 0.000239 | 0.070554 | 1.264426 |
| NONHSAT168794.1   | -1.88211 | 2.237025 | -8.45028 | 0.000239 | 0.070554 | 1.262887 |
| lnc-RMI1-8:1      | -1.24654 | 7.712847 | -8.4236  | 0.000243 | 0.0713   | 1.248034 |
| ENST00000544421.1 | -1.27089 | 7.569378 | -8.39712 | 0.000247 | 0.071861 | 1.233227 |
| NONHSAT180069.1   | 1.061727 | 4.804231 | 8.392388 | 0.000248 | 0.071861 | 1.230578 |
| NONHSAT213595.1   | -1.10719 | 5.820858 | -8.37825 | 0.00025  | 0.071861 | 1.222645 |
| lnc-COL6A5-3:1    | 1.25721  | 1.814675 | 8.376198 | 0.00025  | 0.071861 | 1.221492 |
| MSTRG.40230.1     | 1.169886 | 1.781794 | 8.372368 | 0.000251 | 0.071861 | 1.21934  |
| NR_034147         | 1.204896 | 6.15227  | 8.36933  | 0.000251 | 0.071861 | 1.217631 |
| lnc-NEURL4-3:3    | 1.19428  | 6.041026 | 8.359508 | 0.000253 | 0.071861 | 1.212103 |
| ENST00000411427.3 | -1.7765  | 6.215933 | -8.3456  | 0.000255 | 0.071861 | 1.204259 |
| MSTRG.22909.1     | 1.802832 | 2.03503  | 8.330892 | 0.000257 | 0.071861 | 1.19595  |
| NONHSAT152748.1   | 1.256815 | 1.913024 | 8.319979 | 0.000259 | 0.071861 | 1.189771 |
| NONHSAT213325.1   | -1.38594 | 2.298649 | -8.3193  | 0.000259 | 0.071861 | 1.189385 |
| lnc-OR51B4-3:1    | -1.1575  | 6.511834 | -8.31139 | 0.000261 | 0.071861 | 1.184899 |
| NONHSAT210691.1   | -1.18036 | 1.809499 | -8.30656 | 0.000261 | 0.071861 | 1.18216  |
| lnc-SLC2A12-11:1  | -1.03619 | 3.112884 | -8.29969 | 0.000262 | 0.071861 | 1.178257 |
| lnc-ACER2-4:1     | -1.02391 | 9.728321 | -8.29878 | 0.000263 | 0.071861 | 1.177737 |
| NONHSAT161348.1   | -1.54199 | 2.080095 | -8.29769 | 0.000263 | 0.071861 | 1.177121 |
| lnc-TMBIM4-2:1    | 1.030413 | 2.337252 | 8.296846 | 0.000263 | 0.071861 | 1.17664  |
| NONHSAT197456.1   | 1.741594 | 1.977398 | 8.294286 | 0.000263 | 0.071861 | 1.175184 |
| lnc-GPT2-13:1     | 1.157909 | 2.426038 | 8.291206 | 0.000264 | 0.071861 | 1.173431 |
| lnc-C2CD4B-7:1    | -1.21309 | 6.906156 | -8.28405 | 0.000265 | 0.071861 | 1.169359 |
| lnc-RIOX2-7:1     | -1.01631 | 8.861398 | -8.27601 | 0.000266 | 0.071861 | 1.164771 |
| NR_040079         | 1.151897 | 6.074681 | 8.271499 | 0.000267 | 0.071861 | 1.1622   |
| lnc-RXFP3-2:1     | -1.62116 | 7.418752 | -8.26569 | 0.000268 | 0.071861 | 1.158882 |
| ENST00000669185.1 | 1.361975 | 1.836051 | 8.262403 | 0.000269 | 0.071861 | 1.157004 |
| ENST00000607898.1 | 1.366006 | 5.677944 | 8.261686 | 0.000269 | 0.071861 | 1.156594 |
| lnc-RPL11-7:1     | -1.12803 | 10.44235 | -8.25733 | 0.000269 | 0.071861 | 1.154105 |
| lnc-MYOM1-10:2    | -1.59649 | 3.035424 | -8.2432  | 0.000272 | 0.071861 | 1.146014 |
| MSTRG.56604.1     | 1.637767 | 1.919911 | 8.242698 | 0.000272 | 0.071861 | 1.145724 |
| lnc-RNGTT-1:1     | 1.288603 | 2.017987 | 8.23728  | 0.000273 | 0.071861 | 1.142617 |
| NONHSAT223451.1   | 1.413671 | 1.784225 | 8.231187 | 0.000274 | 0.071861 | 1.13912  |
| ENST00000668509.1 | 2.324937 | 2.619519 | 8.228283 | 0.000274 | 0.071861 | 1.137451 |
| MSTRG.64592.1     | -1.61472 | 5.290136 | -8.21924 | 0.000276 | 0.071966 | 1.132254 |
| T206470           | 1.533986 | 6.023362 | 8.213269 | 0.000277 | 0.071966 | 1.128816 |
| ENST00000521444.1 | -1.38739 | 2.303782 | -8.20957 | 0.000278 | 0.071966 | 1.126683 |
| lnc-GPR65-19:2    | -1.31293 | 11.48399 | -8.20558 | 0.000278 | 0.071966 | 1.124383 |
| NONHSAT205462.1   | -1.78875 | 2.219144 | -8.20527 | 0.000278 | 0.071966 | 1.124209 |
| lnc-AASS-1:1      | -1.63856 | 4.121499 | -8.18804 | 0.000281 | 0.072147 | 1.114259 |
| MSTRG.27714.1     | -1.34688 | 4.1152   | -8.18542 | 0.000282 | 0.072147 | 1.112746 |
| MSTRG.26604.1     | 1.552784 | 4.255779 | 8.180906 | 0.000283 | 0.072147 | 1.110135 |
| lnc-PRPF18-8:9    | 1.724606 | 1.956365 | 8.175568 | 0.000284 | 0.072206 | 1.107044 |
| NONHSAT197558.1   | 1.265305 | 1.78981  | 8.163227 | 0.000286 | 0.072417 | 1.099891 |
| lnc-MAFB-7:1      | -1.06996 | 5.933971 | -8.15455 | 0.000287 | 0.072417 | 1.094854 |
| ENST00000609720.1 | 1.258562 | 1.697937 | 8.152145 | 0.000288 | 0.072417 | 1.093456 |
| NONHSAT174261.1   | 1.087711 | 1.891179 | 8.14697  | 0.000289 | 0.072417 | 1.090447 |
| ENST00000510767.5 | 1.210352 | 6.974145 | 8.132757 | 0.000291 | 0.072886 | 1.082171 |

|                   |          |          |          |          |          |          |
|-------------------|----------|----------|----------|----------|----------|----------|
| lnc-NPY5R-9:1     | -1.12903 | 4.421733 | -8.11489 | 0.000295 | 0.072955 | 1.071745 |
| lnc-USP9Y-10:1    | -1.22909 | 1.722461 | -8.11289 | 0.000295 | 0.072955 | 1.070574 |
| NONHSAT209338.1   | 1.333401 | 5.381597 | 8.108976 | 0.000296 | 0.072955 | 1.068285 |
| NR_024062         | -1.00497 | 9.590439 | -8.10684 | 0.000296 | 0.072955 | 1.067033 |
| lnc-TTLL12-1:2    | 1.769466 | 5.034882 | 8.105482 | 0.000296 | 0.072955 | 1.06624  |
| ENST00000658867.1 | -1.24135 | 8.151774 | -8.10395 | 0.000297 | 0.072955 | 1.065344 |
| NONHSAT172460.1   | -2.02867 | 2.371683 | -8.09654 | 0.000298 | 0.073119 | 1.061004 |
| lnc-SELENOF-11:1  | 1.949687 | 2.021291 | 8.083031 | 0.000301 | 0.073419 | 1.053077 |
| MSTRG.64319.1     | 1.4417   | 1.940589 | 8.059387 | 0.000305 | 0.073878 | 1.039166 |
| NONHSAT224379.1   | 1.664046 | 2.052619 | 8.055347 | 0.000306 | 0.073878 | 1.036784 |
| lnc-CDY2B-13:1    | -1.54931 | 5.531772 | -8.04499 | 0.000308 | 0.073878 | 1.030672 |
| lnc-SNX14-6:1     | -1.1789  | 6.620998 | -8.04233 | 0.000308 | 0.073878 | 1.0291   |
| NONHSAT158450.1   | -1.00661 | 6.359763 | -8.03432 | 0.00031  | 0.073993 | 1.024361 |
| NONHSAT187771.1   | 1.634269 | 4.424868 | 8.029255 | 0.000311 | 0.073993 | 1.021365 |
| lnc-SHISAL2B-2:1  | -1.02221 | 9.449075 | -8.02873 | 0.000311 | 0.073993 | 1.021054 |
| ENST00000655217.1 | 1.28629  | 2.193416 | 8.000793 | 0.000317 | 0.074897 | 1.004476 |
| MSTRG.54604.1     | -1.10059 | 3.900426 | -7.99807 | 0.000317 | 0.074897 | 1.002857 |
| ENST00000563521.2 | -1.08323 | 4.008843 | -7.99498 | 0.000318 | 0.074897 | 1.001019 |
| NONHSAT155095.1   | -1.41203 | 2.005167 | -7.98268 | 0.00032  | 0.075039 | 0.993688 |
| NONHSAT148836.1   | 1.286633 | 5.643157 | 7.979907 | 0.000321 | 0.075039 | 0.992036 |
| MSTRG.26614.1     | 1.0182   | 13.26447 | 7.972794 | 0.000322 | 0.075039 | 0.98779  |
| NONHSAT219875.1   | 1.75617  | 6.628182 | 7.972353 | 0.000323 | 0.075039 | 0.987526 |
| lnc-SEMA3A-1:1    | -1.08269 | 8.481122 | -7.97027 | 0.000323 | 0.075039 | 0.986282 |
| lnc-CSTF3-5:1     | 2.030651 | 2.129303 | 7.942676 | 0.000329 | 0.076077 | 0.969762 |
| ENST00000432488.1 | -1.1528  | 4.080509 | -7.93045 | 0.000331 | 0.076077 | 0.962418 |
| lnc-MFNG-1:1      | 1.253657 | 8.002204 | 7.928005 | 0.000332 | 0.076077 | 0.960949 |
| lnc-UCP2-2:2      | -1.02847 | 8.315984 | -7.9248  | 0.000333 | 0.076077 | 0.95902  |
| MSTRG.57936.1     | 1.350029 | 1.705377 | 7.924448 | 0.000333 | 0.076077 | 0.95881  |
| lnc-DUSP26-6:1    | -2.3061  | 2.842198 | -7.92047 | 0.000333 | 0.076077 | 0.956413 |
| MSTRG.18011.9     | -1.24184 | 7.534443 | -7.91445 | 0.000335 | 0.076157 | 0.95279  |
| ENST00000671654.1 | 1.691708 | 1.972816 | 7.907111 | 0.000336 | 0.076218 | 0.948365 |
| lnc-SLC39A10-7:1  | 1.986376 | 2.19473  | 7.901839 | 0.000338 | 0.076293 | 0.945184 |
| NR_028328         | -2.26689 | 7.11574  | -7.89154 | 0.00034  | 0.076472 | 0.93896  |
| ENST00000623604.2 | 1.22556  | 3.348973 | 7.8839   | 0.000341 | 0.076522 | 0.934339 |
| ENST00000450930.1 | 1.145375 | 5.928922 | 7.879812 | 0.000342 | 0.076522 | 0.931864 |
| NONHSAT155404.1   | 1.275053 | 4.523362 | 7.869067 | 0.000345 | 0.076522 | 0.925349 |
| T362344           | -1.20322 | 7.163922 | -7.83943 | 0.000351 | 0.077272 | 0.907328 |
| MSTRG.63976.1     | 1.016547 | 1.521897 | 7.834883 | 0.000352 | 0.077272 | 0.904554 |
| ENST00000433460.1 | 1.469556 | 5.129982 | 7.831906 | 0.000353 | 0.077272 | 0.902738 |
| ENST00000623980.1 | -1.63072 | 7.313646 | -7.83074 | 0.000353 | 0.077272 | 0.902028 |
| lnc-PHLDA1-3:1    | -1.1349  | 9.551852 | -7.8284  | 0.000354 | 0.077272 | 0.900599 |
| lnc-CA9-2:1       | -1.64181 | 4.253203 | -7.81914 | 0.000356 | 0.077272 | 0.894943 |
| MSTRG.57589.1     | -1.14059 | 1.709746 | -7.81786 | 0.000356 | 0.077272 | 0.894161 |
| lnc-RHBDL2-1:1    | -1.16711 | 5.804577 | -7.81488 | 0.000357 | 0.077272 | 0.892333 |
| NONHSAT156588.1   | 1.152716 | 4.279163 | 7.811536 | 0.000358 | 0.077272 | 0.890289 |
| lnc-ADAT2-2:1     | 1.090297 | 5.198359 | 7.790012 | 0.000363 | 0.078198 | 0.877092 |
| lnc-PIK3C3-14:1   | -1.3462  | 4.637713 | -7.78571 | 0.000364 | 0.07825  | 0.874452 |
| MSTRG.27436.1     | 1.624882 | 2.184364 | 7.770803 | 0.000368 | 0.078682 | 0.865278 |

|                   |          |          |          |          |          |          |
|-------------------|----------|----------|----------|----------|----------|----------|
| NONHSAT157747.1   | -1.20897 | 11.35986 | -7.75254 | 0.000372 | 0.079461 | 0.854013 |
| ENST00000657495.1 | 1.150433 | 1.798782 | 7.745281 | 0.000374 | 0.079672 | 0.849527 |
| MSTRG.4616.1      | 1.953931 | 2.061542 | 7.736314 | 0.000376 | 0.0797   | 0.843978 |
| NONHSAT165061.1   | 1.406811 | 3.485397 | 7.732603 | 0.000377 | 0.0797   | 0.84168  |
| MSTRG.63251.25    | 1.049263 | 5.456071 | 7.731931 | 0.000377 | 0.0797   | 0.841264 |
| NONHSAT197981.1   | 1.376486 | 2.310734 | 7.7115   | 0.000382 | 0.080027 | 0.828584 |
| NONHSAT222260.1   | 1.06179  | 1.672943 | 7.708241 | 0.000383 | 0.080027 | 0.826558 |
| ENST00000563205.1 | 1.043303 | 8.785009 | 7.699671 | 0.000385 | 0.080027 | 0.821225 |
| NONHSAT149533.1   | -1.09248 | 7.588034 | -7.68783 | 0.000388 | 0.080027 | 0.813843 |
| NONHSAT193506.1   | 1.035082 | 7.543953 | 7.676092 | 0.000391 | 0.080027 | 0.806516 |
| lnc-AKR1E2-13:1   | 1.114973 | 5.196937 | 7.660134 | 0.000395 | 0.080027 | 0.79653  |
| NONHSAT206852.1   | 1.603245 | 1.938336 | 7.654144 | 0.000397 | 0.080027 | 0.792776 |
| lnc-COPS2-5:1     | -1.14049 | 9.125598 | -7.65245 | 0.000397 | 0.080027 | 0.791716 |
| lnc-FAM149B1-8:1  | 1.515049 | 4.294993 | 7.646757 | 0.000399 | 0.080027 | 0.788141 |
| NONHSAT185214.1   | 1.45756  | 1.818813 | 7.645058 | 0.000399 | 0.080027 | 0.787075 |
| lnc-VPS33B-8:2    | -1.4227  | 2.571047 | -7.63583 | 0.000402 | 0.080027 | 0.781279 |
| T297391           | 2.225389 | 3.486592 | 7.633605 | 0.000402 | 0.080027 | 0.779876 |
| lnc-CASP6-4:1     | 1.43149  | 1.979969 | 7.61611  | 0.000407 | 0.080027 | 0.768856 |
| MSTRG.12445.1     | -1.02142 | 4.743196 | -7.60962 | 0.000409 | 0.080027 | 0.764759 |
| lnc-SLC25A35-2:1  | -1.34417 | 4.449081 | -7.60469 | 0.00041  | 0.080027 | 0.761647 |
| lnc-ICOSLG-6:12   | 2.270578 | 2.300671 | 7.585273 | 0.000416 | 0.080027 | 0.749359 |
| MSTRG.38314.27    | -1.16037 | 4.8542   | -7.57891 | 0.000417 | 0.080027 | 0.745327 |
| NONHSAT218324.1   | 1.70036  | 1.902271 | 7.577568 | 0.000418 | 0.080027 | 0.744473 |
| NONHSAT180712.1   | -1.31764 | 6.896325 | -7.55822 | 0.000423 | 0.080027 | 0.732176 |
| lnc-GGTLC1-6:1    | -1.03502 | 5.752497 | -7.54951 | 0.000426 | 0.080027 | 0.726632 |
| MYOSLID:14        | 1.35984  | 5.452351 | 7.533583 | 0.00043  | 0.080027 | 0.716469 |
| NONHSAT199561.1   | 1.940828 | 2.245826 | 7.527112 | 0.000432 | 0.080027 | 0.712333 |
| lnc-CLDN5-2:1     | -1.04138 | 5.588046 | -7.519   | 0.000434 | 0.080027 | 0.707141 |
| NONHSAT207539.1   | 1.568795 | 2.000525 | 7.508142 | 0.000438 | 0.080027 | 0.700185 |
| NONHSAT201940.1   | 1.400474 | 1.852704 | 7.501155 | 0.00044  | 0.080027 | 0.695701 |
| lnc-KLF15-2:5     | -1.40368 | 5.865279 | -7.49733 | 0.000441 | 0.080027 | 0.693245 |
| NONHSAT158772.1   | -1.13831 | 1.687556 | -7.49455 | 0.000442 | 0.080027 | 0.691457 |
| ENST00000412996.1 | -1.64049 | 3.524146 | -7.49084 | 0.000443 | 0.080027 | 0.689073 |
| NONHSAT150153.1   | 2.56914  | 2.377697 | 7.488292 | 0.000444 | 0.080027 | 0.687434 |
| lnc-ZFAND5-2:1    | 2.049144 | 2.350952 | 7.486249 | 0.000444 | 0.080027 | 0.68612  |
| lnc-ATG16L2-10:1  | -2.12701 | 2.23035  | -7.47717 | 0.000447 | 0.080027 | 0.680274 |
| NONHSAT204375.1   | -1.04001 | 10.97681 | -7.47619 | 0.000447 | 0.080027 | 0.679642 |
| NONHSAT221638.1   | -1.22902 | 10.23009 | -7.47483 | 0.000448 | 0.080027 | 0.678767 |
| ENST00000600534.1 | 1.012114 | 5.181544 | 7.46417  | 0.000451 | 0.080027 | 0.671887 |
| ENST00000609475.1 | 1.043839 | 8.308984 | 7.461436 | 0.000452 | 0.080027 | 0.670122 |
| ENST00000671681.1 | 1.107433 | 3.398375 | 7.457203 | 0.000453 | 0.080027 | 0.667386 |
| MSTRG.37754.1     | 1.039195 | 4.360253 | 7.431803 | 0.000461 | 0.080027 | 0.650934 |
| ENST00000649038.1 | 1.645273 | 2.649124 | 7.41308  | 0.000467 | 0.080027 | 0.638766 |
| MSTRG.27998.1     | -1.18528 | 3.652774 | -7.40843 | 0.000468 | 0.080027 | 0.635741 |
| MSTRG.20779.1     | 1.276197 | 1.728781 | 7.404439 | 0.00047  | 0.080027 | 0.633138 |
| NONHSAT219631.1   | -1.72306 | 3.26034  | -7.40252 | 0.00047  | 0.080027 | 0.631885 |
| NONHSAT160720.1   | -1.50963 | 4.393783 | -7.40109 | 0.000471 | 0.080027 | 0.630955 |
| NONHSAT195523.1   | 2.753521 | 2.46564  | 7.39419  | 0.000473 | 0.080027 | 0.626454 |

|                   |          |          |          |          |          |          |
|-------------------|----------|----------|----------|----------|----------|----------|
| NONHSAT210186.1   | -1.0364  | 2.731789 | -7.39278 | 0.000473 | 0.080027 | 0.625535 |
| lnc-RNF152-9:1    | 1.234283 | 3.759154 | 7.388281 | 0.000475 | 0.080027 | 0.622594 |
| lnc-MBOAT4-8:1    | -1.09168 | 5.414611 | -7.37809 | 0.000478 | 0.080027 | 0.61593  |
| MSTRG.5819.15     | 1.14595  | 6.076876 | 7.377468 | 0.000478 | 0.080027 | 0.615524 |
| lnc-ATG2B-10:2    | -1.14748 | 4.648803 | -7.37569 | 0.000479 | 0.080027 | 0.614358 |
| MSTRG.51309.1     | -1.06564 | 10.23774 | -7.36091 | 0.000484 | 0.080027 | 0.604672 |
| lnc-DNER-4:1      | 1.844055 | 2.142162 | 7.353098 | 0.000486 | 0.080027 | 0.599544 |
| ENST00000669110.1 | 2.440668 | 2.333446 | 7.344269 | 0.000489 | 0.080027 | 0.59374  |
| NONHSAT192289.1   | -1.66501 | 3.077244 | -7.34246 | 0.00049  | 0.080027 | 0.592553 |
| lnc-RASA1-21:1    | 1.401051 | 1.877588 | 7.336617 | 0.000492 | 0.080027 | 0.588703 |
| lnc-TRIM32-8:1    | 1.373494 | 1.735084 | 7.335273 | 0.000492 | 0.080027 | 0.587818 |
| ENST00000616866.1 | 1.187515 | 7.564878 | 7.327211 | 0.000495 | 0.080027 | 0.582504 |
| MSTRG.70386.1     | 1.544885 | 2.074902 | 7.318466 | 0.000498 | 0.080027 | 0.576731 |
| ENST00000565399.1 | 2.150718 | 2.28704  | 7.316735 | 0.000499 | 0.080027 | 0.575588 |
| lnc-CPPED1-6:1    | -1.09433 | 3.588143 | -7.31596 | 0.000499 | 0.080027 | 0.575074 |
| NONHSAT171431.1   | 1.200166 | 9.062833 | 7.314592 | 0.000499 | 0.080027 | 0.574172 |
| ENST00000663787.1 | -1.95957 | 2.545549 | -7.31358 | 0.0005   | 0.080027 | 0.573501 |
| lnc-HIST1H2AH-5:1 | -1.39175 | 8.271854 | -7.31215 | 0.0005   | 0.080027 | 0.572557 |
| lnc-C11orf58-3:1  | -1.02614 | 4.88644  | -7.30857 | 0.000501 | 0.080027 | 0.570189 |
| lnc-GJA4-2:1      | -1.69833 | 5.085332 | -7.30621 | 0.000502 | 0.080027 | 0.568626 |
| NONHSAT172361.1   | 1.540962 | 4.246873 | 7.300022 | 0.000504 | 0.080027 | 0.564532 |
| NONHSAT197816.1   | -1.37181 | 3.928923 | -7.29292 | 0.000507 | 0.080027 | 0.559822 |
| MSTRG.52010.1     | -1.26565 | 4.857154 | -7.28194 | 0.000511 | 0.080027 | 0.55254  |
| MSTRG.63624.1     | 1.054815 | 1.994129 | 7.280951 | 0.000511 | 0.080027 | 0.551881 |
| NONHSAT211423.1   | 1.527579 | 1.812871 | 7.2696   | 0.000515 | 0.080027 | 0.544333 |
| NONHSAT214907.1   | 1.150416 | 1.706462 | 7.25736  | 0.00052  | 0.080027 | 0.53618  |
| lnc-WDR77-3:1     | 2.024139 | 2.062723 | 7.240807 | 0.000526 | 0.080027 | 0.525127 |
| NONHSAT176042.1   | 1.791154 | 1.973906 | 7.239829 | 0.000526 | 0.080027 | 0.524474 |
| T138549           | 2.452123 | 3.369913 | 7.237392 | 0.000527 | 0.080027 | 0.522844 |
| NONHSAT185783.1   | -1.98393 | 2.238952 | -7.23504 | 0.000528 | 0.080027 | 0.521268 |
| NONHSAT214027.1   | 1.711476 | 2.091292 | 7.202536 | 0.00054  | 0.080027 | 0.499466 |
| MSTRG.30364.1     | 1.685496 | 1.888726 | 7.201141 | 0.00054  | 0.080027 | 0.498528 |
| ENST00000657178.1 | 1.764962 | 2.00744  | 7.191224 | 0.000544 | 0.080027 | 0.491852 |
| NONHSAT182669.1   | 1.79841  | 1.953699 | 7.180267 | 0.000548 | 0.080027 | 0.484464 |
| LINC02246:26      | 1.250206 | 5.626534 | 7.177262 | 0.000549 | 0.080027 | 0.482435 |
| T146351           | -1.62237 | 1.989603 | -7.175   | 0.00055  | 0.080027 | 0.480906 |
| NONHSAT193328.1   | -1.28508 | 1.717793 | -7.17372 | 0.000551 | 0.080027 | 0.480042 |
| T203331           | 1.856905 | 2.045955 | 7.171398 | 0.000552 | 0.080027 | 0.478474 |
| ENST00000412014.1 | -1.07478 | 1.664284 | -7.16107 | 0.000556 | 0.080027 | 0.471486 |
| ENST00000430861.1 | -1.95162 | 2.705179 | -7.16095 | 0.000556 | 0.080027 | 0.471409 |
| NONHSAT168355.1   | 1.774853 | 2.232362 | 7.154702 | 0.000558 | 0.080027 | 0.467176 |
| NR_004383         | -1.02878 | 10.05314 | -7.15194 | 0.000559 | 0.080027 | 0.465307 |
| NONHSAT193652.1   | -1.45268 | 1.90134  | -7.15045 | 0.00056  | 0.080027 | 0.464295 |
| lnc-LRP1B-5:1     | -1.13108 | 4.476373 | -7.14751 | 0.000561 | 0.080027 | 0.462298 |
| NONHSAT158257.1   | 1.320206 | 1.712939 | 7.141108 | 0.000564 | 0.080027 | 0.457955 |
| MSTRG.40488.1     | 1.286404 | 1.677475 | 7.139825 | 0.000564 | 0.080027 | 0.457085 |
| lnc-CHD1L-4:1     | 1.150676 | 1.634034 | 7.138701 | 0.000564 | 0.080027 | 0.456321 |
| MSTRG.49052.1     | -1.89134 | 2.532196 | -7.13764 | 0.000565 | 0.080027 | 0.455601 |

|                   |          |          |          |          |          |          |
|-------------------|----------|----------|----------|----------|----------|----------|
| NONHSAT193725.1   | 1.700869 | 5.693469 | 7.13535  | 0.000566 | 0.080027 | 0.454044 |
| NONHSAT223754.1   | -1.12973 | 4.908521 | -7.12336 | 0.000571 | 0.080027 | 0.445886 |
| NONHSAT204910.1   | -1.36653 | 2.022477 | -7.12236 | 0.000571 | 0.080027 | 0.445205 |
| NR_125950         | -1.39751 | 2.795136 | -7.12232 | 0.000571 | 0.080027 | 0.445179 |
| MSTRG.11151.1     | 1.723747 | 1.943909 | 7.12208  | 0.000571 | 0.080027 | 0.445017 |
| NONHSAT212907.1   | 1.250113 | 1.884781 | 7.112941 | 0.000575 | 0.080027 | 0.438788 |
| lnc-ZNF672-1:3    | -1.68757 | 3.163836 | -7.11112 | 0.000576 | 0.080027 | 0.437546 |
| ENST00000607744.1 | 1.02635  | 5.202631 | 7.108393 | 0.000577 | 0.080027 | 0.435685 |
| NONHSAT199158.1   | -1.04361 | 1.853308 | -7.10822 | 0.000577 | 0.080027 | 0.435569 |
| lnc-LTA4H-4:1     | -1.00937 | 9.180161 | -7.10655 | 0.000577 | 0.080027 | 0.434426 |
| NONHSAT206835.1   | 1.538012 | 4.678498 | 7.105986 | 0.000578 | 0.080027 | 0.434042 |
| NONHSAT186577.1   | -1.74099 | 1.906379 | -7.09613 | 0.000582 | 0.080027 | 0.427311 |
| NONHSAT187095.1   | 1.941361 | 2.071413 | 7.094728 | 0.000582 | 0.080027 | 0.426349 |
| NONHSAT152946.1   | -1.05703 | 3.068009 | -7.09347 | 0.000583 | 0.080027 | 0.425486 |
| lnc-DAW1-5:1      | -1.60984 | 4.815884 | -7.09232 | 0.000583 | 0.080027 | 0.424705 |
| T225505           | -1.75404 | 2.163787 | -7.08423 | 0.000587 | 0.080027 | 0.41916  |
| NONHSAT181855.1   | -1.36577 | 6.41131  | -7.07935 | 0.000589 | 0.080027 | 0.415822 |
| lnc-PLGRKT-4:1    | 1.808182 | 3.332304 | 7.069436 | 0.000593 | 0.080027 | 0.409016 |
| lnc-PRR5-2:1      | -1.09887 | 7.574958 | -7.06774 | 0.000593 | 0.080027 | 0.407849 |
| ENST00000558948.1 | 1.27712  | 4.710735 | 7.063934 | 0.000595 | 0.080027 | 0.405236 |
| lnc-HIST1H4H-1:1  | 1.456746 | 5.065353 | 7.055279 | 0.000599 | 0.080027 | 0.399284 |
| NONHSAT164765.1   | 1.37984  | 2.072143 | 7.054346 | 0.000599 | 0.080027 | 0.398642 |
| NONHSAT177705.1   | -1.16233 | 1.663342 | -7.05032 | 0.000601 | 0.080027 | 0.395871 |
| MSTRG.54672.2     | -1.49787 | 1.826069 | -7.04726 | 0.000602 | 0.080027 | 0.393761 |
| ENST00000569677.1 | 1.531836 | 1.870471 | 7.047244 | 0.000602 | 0.080027 | 0.393751 |
| ENST00000656319.1 | 1.100605 | 5.856367 | 7.040603 | 0.000605 | 0.080027 | 0.389173 |
| lnc-AFDN-8:1      | -1.50765 | 2.0717   | -7.036   | 0.000607 | 0.080027 | 0.385994 |
| lnc-TMA16-4:2     | 1.641419 | 3.909983 | 7.035044 | 0.000607 | 0.080027 | 0.385337 |
| lnc-NFYB-1:5      | 1.125743 | 8.895134 | 7.023392 | 0.000613 | 0.080027 | 0.377285 |
| MSTRG.71794.1     | -1.89091 | 2.978468 | -7.01997 | 0.000614 | 0.080027 | 0.374921 |
| ENST00000670022.1 | 1.550095 | 2.151464 | 7.012602 | 0.000617 | 0.080027 | 0.369816 |
| MSTRG.28398.1     | 1.408041 | 1.930106 | 7.007906 | 0.000619 | 0.080027 | 0.366561 |
| lnc-B3GAT2-7:1    | -1.27882 | 3.452253 | -7.0011  | 0.000622 | 0.080027 | 0.361842 |
| lnc-PIGP-1:1      | 1.214363 | 2.072759 | 6.991764 | 0.000627 | 0.080027 | 0.355355 |
| NONHSAT188014.1   | -1.11349 | 4.865259 | -6.98836 | 0.000628 | 0.080027 | 0.352987 |
| lnc-SYT13-8:1     | 1.245053 | 6.315713 | 6.981381 | 0.000631 | 0.080027 | 0.348133 |
| lnc-RAP1B-5:3     | -1.50279 | 1.887397 | -6.98094 | 0.000631 | 0.080027 | 0.347823 |
| NONHSAT192727.1   | 1.847353 | 1.974323 | 6.975594 | 0.000634 | 0.080027 | 0.344101 |
| MSTRG.17975.21    | 2.193643 | 3.369567 | 6.972005 | 0.000635 | 0.080027 | 0.3416   |
| NONHSAT174480.1   | 1.278195 | 3.863197 | 6.956875 | 0.000642 | 0.080027 | 0.331038 |
| lnc-VASH1-1:1     | -1.07436 | 9.329316 | -6.95269 | 0.000644 | 0.080027 | 0.328113 |
| ENST00000670306.1 | 1.423086 | 4.287747 | 6.950008 | 0.000646 | 0.080027 | 0.326236 |
| lnc-SPANXN1-1:1   | -1.15286 | 10.507   | -6.94607 | 0.000647 | 0.080027 | 0.323481 |
| lnc-SNTB1-3:1     | -1.22136 | 6.060137 | -6.94595 | 0.000647 | 0.080027 | 0.323394 |
| lnc-MIAP-3:1      | -1.55644 | 3.038437 | -6.94506 | 0.000648 | 0.080027 | 0.322774 |
| NONHSAT197128.1   | -2.04733 | 2.660599 | -6.93415 | 0.000653 | 0.080027 | 0.315127 |
| ENST00000432413.2 | 1.473655 | 4.669327 | 6.93355  | 0.000653 | 0.080027 | 0.314706 |
| NONHSAT185399.1   | 1.104358 | 3.70922  | 6.932748 | 0.000654 | 0.080027 | 0.314144 |

|                   |          |          |          |          |          |          |
|-------------------|----------|----------|----------|----------|----------|----------|
| lnc-TRMT1L-3:1    | -1.0343  | 5.485945 | -6.92397 | 0.000658 | 0.080027 | 0.307983 |
| lnc-RNF144B-5:1   | -1.33801 | 3.916517 | -6.92207 | 0.000659 | 0.080027 | 0.306649 |
| NONHSAT201163.1   | 1.073749 | 3.852484 | 6.915376 | 0.000662 | 0.080027 | 0.301939 |
| ENST00000605836.1 | 1.013049 | 5.936759 | 6.914817 | 0.000662 | 0.080027 | 0.301546 |
| T219111           | 1.219527 | 4.429279 | 6.908807 | 0.000665 | 0.080027 | 0.297316 |
| NONHSAT203830.1   | 1.384918 | 1.792361 | 6.901109 | 0.000669 | 0.080027 | 0.291892 |
| NR_037839         | 1.300619 | 1.722274 | 6.891448 | 0.000673 | 0.080027 | 0.285075 |
| NONHSAT168109.1   | -1.30316 | 2.005192 | -6.88545 | 0.000676 | 0.080027 | 0.280836 |
| lnc-BATF-1:1      | -1.42262 | 6.627265 | -6.88267 | 0.000678 | 0.080027 | 0.278869 |
| NONHSAT167728.1   | 1.965941 | 2.09258  | 6.881158 | 0.000678 | 0.080027 | 0.277803 |
| NONHSAT210837.1   | 1.894453 | 2.035625 | 6.88057  | 0.000679 | 0.080027 | 0.277387 |
| NONHSAT190516.1   | 1.590715 | 1.851097 | 6.880358 | 0.000679 | 0.080027 | 0.277237 |
| NONHSAT158087.1   | 1.078709 | 1.758221 | 6.873984 | 0.000682 | 0.080027 | 0.272726 |
| ENST00000491932.1 | 1.202806 | 4.721769 | 6.871271 | 0.000683 | 0.080027 | 0.270804 |
| NONHSAT150157.1   | 1.203847 | 6.363695 | 6.869774 | 0.000684 | 0.080027 | 0.269744 |
| lnc-FGF18-4:2     | 1.136339 | 1.684108 | 6.854613 | 0.000692 | 0.080027 | 0.258989 |
| NONHSAT164439.1   | 1.222655 | 2.426078 | 6.854478 | 0.000692 | 0.080027 | 0.258893 |
| lnc-CA8-9:1       | -1.15062 | 3.659527 | -6.854   | 0.000692 | 0.080027 | 0.258554 |
| NONHSAT191877.1   | -1.2204  | 4.49979  | -6.84111 | 0.000699 | 0.080027 | 0.249386 |
| lnc-NDUFA4-2:1    | -1.32891 | 2.784643 | -6.83297 | 0.000703 | 0.080027 | 0.243591 |
| lnc-SPNS3-1:5     | 1.135987 | 6.08002  | 6.827082 | 0.000706 | 0.080027 | 0.239393 |
| lnc-MANEA-9:1     | -1.14162 | 8.933094 | -6.82683 | 0.000706 | 0.080027 | 0.239209 |
| lnc-C13orf46-4:2  | 1.009153 | 6.227009 | 6.825977 | 0.000706 | 0.080027 | 0.238604 |
| lnc-ME2-2:1       | -2.11809 | 4.274908 | -6.8196  | 0.00071  | 0.080027 | 0.234055 |
| NONHSAT196570.1   | 1.776386 | 2.262775 | 6.803373 | 0.000718 | 0.080027 | 0.222448 |
| MSTRG.7116.1      | -1.03478 | 5.513292 | -6.80141 | 0.000719 | 0.080027 | 0.221044 |
| ENST00000653275.1 | -1.75521 | 2.164816 | -6.8003  | 0.00072  | 0.080027 | 0.220249 |
| lnc-SEMA6A-1:2    | 1.685919 | 1.922791 | 6.79999  | 0.00072  | 0.080027 | 0.220025 |
| lnc-DCP1B-9:2     | -1.17295 | 2.162221 | -6.79811 | 0.000721 | 0.080027 | 0.218682 |
| NONHSAT186205.1   | 1.391847 | 2.291462 | 6.792936 | 0.000724 | 0.080027 | 0.214969 |
| NONHSAT176959.1   | -1.52066 | 3.917489 | -6.7832  | 0.000729 | 0.080027 | 0.207984 |
| NONHSAT203888.1   | -1.19481 | 9.230616 | -6.78303 | 0.000729 | 0.080027 | 0.207862 |
| MSTRG.53241.1     | 1.241869 | 6.365451 | 6.776907 | 0.000732 | 0.080027 | 0.203459 |
| ENST00000417385.2 | -1.00743 | 8.049647 | -6.7729  | 0.000734 | 0.080027 | 0.200579 |
| lnc-BNIP1-5:4     | 1.136038 | 3.552105 | 6.763624 | 0.000739 | 0.080027 | 0.193898 |
| NONHSAT196594.1   | -1.97552 | 3.043373 | -6.76083 | 0.000741 | 0.080027 | 0.191883 |
| MSTRG.66149.1     | -1.30203 | 1.950046 | -6.75705 | 0.000743 | 0.080027 | 0.189158 |
| lnc-NENF-5:1      | -1.83455 | 2.811025 | -6.75646 | 0.000743 | 0.080027 | 0.188731 |
| lnc-ANO2-3:4      | 1.376913 | 6.092212 | 6.751744 | 0.000746 | 0.080027 | 0.18533  |
| lnc-TSPYL6-5:1    | -1.11855 | 5.744385 | -6.75026 | 0.000747 | 0.080027 | 0.184257 |
| ENST00000443284.1 | -1.01202 | 3.260997 | -6.74826 | 0.000748 | 0.080027 | 0.182817 |
| lnc-FAM20B-2:1    | 1.523895 | 5.850438 | 6.744066 | 0.00075  | 0.080027 | 0.179784 |
| T017018           | 2.133698 | 2.714689 | 6.742351 | 0.000751 | 0.080027 | 0.178545 |
| lnc-BCAT2-1:1     | -1.19711 | 9.503006 | -6.73956 | 0.000753 | 0.080027 | 0.176524 |
| NONHSAT215224.1   | 1.798946 | 2.003905 | 6.720518 | 0.000763 | 0.080027 | 0.162733 |
| ENST00000513871.1 | 1.969117 | 2.166249 | 6.716849 | 0.000765 | 0.080027 | 0.160071 |
| NONHSAT215185.1   | -1.15778 | 3.393773 | -6.71324 | 0.000767 | 0.080027 | 0.157448 |
| lnc-JMJD1C-7:1    | -1.34898 | 3.253669 | -6.71204 | 0.000768 | 0.080027 | 0.156579 |

|                   |          |          |          |          |          |          |
|-------------------|----------|----------|----------|----------|----------|----------|
| NONHSAT181733.1   | -1.82488 | 2.016595 | -6.7111  | 0.000769 | 0.080027 | 0.155894 |
| MSTRG.72742.1     | 1.24134  | 1.697806 | 6.710984 | 0.000769 | 0.080027 | 0.155812 |
| lnc-RASGRP3-5:1   | 1.412737 | 1.923288 | 6.701791 | 0.000774 | 0.080027 | 0.149128 |
| NONHSAT215383.1   | 1.199706 | 6.185458 | 6.698628 | 0.000776 | 0.080027 | 0.146826 |
| NONHSAT175806.1   | 2.162926 | 2.278206 | 6.697055 | 0.000777 | 0.080027 | 0.14568  |
| NONHSAT188381.1   | -1.55933 | 2.111304 | -6.69106 | 0.00078  | 0.080027 | 0.14131  |
| lnc-OTOR-3:2      | -1.69185 | 3.880948 | -6.69014 | 0.000781 | 0.080027 | 0.140641 |
| NONHSAT199170.1   | 1.233236 | 3.800076 | 6.687992 | 0.000782 | 0.080027 | 0.139077 |
| NONHSAT178915.1   | 1.367766 | 2.597984 | 6.686952 | 0.000782 | 0.080027 | 0.138318 |
| lnc-SPATA31A1-5:6 | -1.98481 | 2.454631 | -6.68669 | 0.000783 | 0.080027 | 0.138129 |
| lnc-TEKT4-2:1     | -1.45203 | 8.027886 | -6.68556 | 0.000783 | 0.080027 | 0.137305 |
| T315079           | -1.2447  | 8.639162 | -6.68194 | 0.000785 | 0.080027 | 0.134664 |
| lnc-DHX38-29:3    | -1.95574 | 2.131124 | -6.6811  | 0.000786 | 0.080027 | 0.134048 |
| NONHSAT159921.1   | 2.383564 | 2.600832 | 6.680227 | 0.000786 | 0.080027 | 0.13341  |
| ENST00000413286.1 | -1.64712 | 1.988946 | -6.67933 | 0.000787 | 0.080027 | 0.132757 |
| MSTRG.30517.2     | 1.816027 | 3.615446 | 6.677899 | 0.000788 | 0.080027 | 0.131711 |
| lnc-TRIM2-1:1     | -1.10159 | 5.06617  | -6.67302 | 0.000791 | 0.080027 | 0.128145 |
| lnc-LY96-2:6      | 2.214756 | 2.171582 | 6.665299 | 0.000795 | 0.080027 | 0.122499 |
| ENST00000611946.1 | 1.498077 | 3.80501  | 6.663875 | 0.000796 | 0.080027 | 0.121457 |
| ENST00000446301.1 | 1.075135 | 6.799386 | 6.656431 | 0.0008   | 0.080027 | 0.116005 |
| NONHSAT175662.1   | 1.39017  | 1.813611 | 6.653695 | 0.000802 | 0.080027 | 0.113999 |
| NONHSAT158019.1   | -1.6207  | 7.363321 | -6.653   | 0.000802 | 0.080027 | 0.113489 |
| MSTRG.8669.21     | -1.43992 | 3.619293 | -6.64488 | 0.000807 | 0.080027 | 0.107531 |
| ENST00000507950.1 | -1.18559 | 1.723842 | -6.6422  | 0.000809 | 0.080027 | 0.105565 |
| NONHSAT178179.1   | 1.168511 | 1.892345 | 6.632936 | 0.000815 | 0.080027 | 0.098754 |
| lnc-AMZ1-1:1      | 1.523045 | 3.08592  | 6.627691 | 0.000818 | 0.080027 | 0.094894 |
| ENST00000518598.1 | 1.362803 | 3.501837 | 6.623891 | 0.00082  | 0.080027 | 0.092096 |
| NONHSAT169398.1   | 1.493152 | 1.846915 | 6.613825 | 0.000826 | 0.080027 | 0.084675 |
| NONHSAT179771.1   | 1.149748 | 3.604831 | 6.611638 | 0.000828 | 0.080027 | 0.083061 |
| lnc-CDK20-13:1    | -1.09885 | 3.187746 | -6.60863 | 0.00083  | 0.080027 | 0.080841 |
| lnc-PPIL2-7:2     | 1.97211  | 2.640655 | 6.601912 | 0.000834 | 0.080027 | 0.075877 |
| NONHSAT211913.1   | 1.702132 | 2.018191 | 6.598985 | 0.000836 | 0.080027 | 0.073713 |
| NONHSAT163946.1   | 1.333212 | 5.768017 | 6.597128 | 0.000837 | 0.080027 | 0.07234  |
| MSTRG.7117.1      | -1.79092 | 2.415495 | -6.59585 | 0.000837 | 0.080027 | 0.071397 |
| lnc-RAP1B-6:1     | -1.52974 | 7.592472 | -6.59078 | 0.000841 | 0.080027 | 0.067644 |
| NONHSAT156094.1   | 1.82529  | 2.122478 | 6.583575 | 0.000845 | 0.080027 | 0.062302 |
| NONHSAT175498.1   | 1.013674 | 5.089804 | 6.578828 | 0.000848 | 0.080027 | 0.058782 |
| lnc-LEPROTL1-13:4 | 1.63477  | 2.516886 | 6.576147 | 0.00085  | 0.080027 | 0.056793 |
| lnc-GALNT12-1:1   | -1.11462 | 7.785592 | -6.57558 | 0.00085  | 0.080027 | 0.056368 |
| MSTRG.58791.1     | -1.20485 | 8.016013 | -6.57136 | 0.000853 | 0.080027 | 0.053238 |
| lnc-USP16-11:1    | -1.79896 | 2.177762 | -6.56789 | 0.000855 | 0.080027 | 0.050657 |
| lnc-ANXA6-5:1     | 1.213862 | 5.78913  | 6.566312 | 0.000856 | 0.080027 | 0.049487 |
| lnc-UHRF1BP1-2:1  | -1.35837 | 9.983194 | -6.56162 | 0.000859 | 0.080027 | 0.045997 |
| NONHSAT180060.1   | 1.003554 | 8.090199 | 6.559811 | 0.000861 | 0.080027 | 0.044651 |
| ENST00000454928.5 | 1.283032 | 5.620791 | 6.558722 | 0.000861 | 0.080027 | 0.043841 |
| lnc-C19orf57-8:1  | 1.151021 | 6.248333 | 6.558065 | 0.000862 | 0.080027 | 0.043352 |
| NONHSAT191743.1   | 1.997448 | 3.565959 | 6.538972 | 0.000874 | 0.080027 | 0.029118 |
| lnc-CAV1-1:1      | 1.085756 | 3.603998 | 6.537573 | 0.000875 | 0.080027 | 0.028073 |



|                   |          |          |          |          |          |          |
|-------------------|----------|----------|----------|----------|----------|----------|
| ENST00000456103.1 | -2.14303 | 2.576584 | -6.53513 | 0.000877 | 0.080027 | 0.02625  |
| T194191           | 1.374917 | 2.113044 | 6.526957 | 0.000882 | 0.080027 | 0.020138 |
| lnc-DEPDC1-1:1    | -1.30564 | 3.233201 | -6.5206  | 0.000886 | 0.080027 | 0.015378 |
| ENST00000668625.1 | -1.05517 | 1.757932 | -6.51904 | 0.000887 | 0.080027 | 0.014211 |
| ENST00000521660.1 | -1.883   | 2.8561   | -6.51468 | 0.00089  | 0.080027 | 0.010945 |
| NONHSAT203193.1   | 1.056316 | 1.610153 | 6.511524 | 0.000893 | 0.080027 | 0.008579 |
| NONHSAT156302.1   | 1.227015 | 2.738766 | 6.502171 | 0.000899 | 0.080027 | 0.00156  |
| ENST00000565600.1 | -1.0692  | 1.878041 | -6.50215 | 0.000899 | 0.080027 | 0.001541 |
| lnc-KDM5C-5:1     | -1.01911 | 10.77778 | -6.50059 | 0.0009   | 0.080027 | 0.000372 |
| lnc-GRIK3-2:1     | 1.961477 | 2.455527 | 6.498946 | 0.000901 | 0.080027 | -0.00086 |
| lnc-ZNF680-15:1   | 1.549354 | 2.015284 | 6.495178 | 0.000904 | 0.080027 | -0.0037  |
| NONHSAT185478.1   | -1.9027  | 2.441174 | -6.49404 | 0.000904 | 0.080027 | -0.00455 |
| NONHSAT161124.1   | -1.61374 | 2.69456  | -6.49134 | 0.000906 | 0.080027 | -0.00658 |
| lnc-POLE4-8:3     | 2.188005 | 4.130314 | 6.488    | 0.000909 | 0.080027 | -0.00909 |
| T356625           | 1.320406 | 1.995661 | 6.487708 | 0.000909 | 0.080027 | -0.00931 |
| lnc-EGLN1-1:10    | 1.036023 | 7.253497 | 6.483542 | 0.000912 | 0.080027 | -0.01245 |
| ENST00000568729.1 | -1.08451 | 9.739151 | -6.47697 | 0.000916 | 0.080027 | -0.01741 |
| ENST00000665401.1 | -1.25254 | 3.790249 | -6.47682 | 0.000916 | 0.080027 | -0.01752 |
| NONHSAT211796.1   | 1.013208 | 5.432623 | 6.47346  | 0.000919 | 0.080027 | -0.02005 |
| NONHSAT161257.1   | -1.75678 | 3.018586 | -6.47242 | 0.000919 | 0.080027 | -0.02084 |
| lnc-RNF44-1:1     | -1.15366 | 10.22896 | -6.47083 | 0.000921 | 0.080027 | -0.02203 |
| lnc-AGPAT2-1:13   | 1.381268 | 5.080224 | 6.466081 | 0.000924 | 0.080027 | -0.02562 |
| ENST00000566957.1 | 1.522687 | 2.172298 | 6.465624 | 0.000924 | 0.080027 | -0.02597 |
| MSTRG.23181.1     | 1.440059 | 1.944644 | 6.465186 | 0.000925 | 0.080027 | -0.0263  |
| MSTRG.53475.5     | -2.33966 | 2.56832  | -6.46248 | 0.000926 | 0.080027 | -0.02834 |
| ENST00000649460.1 | 1.399459 | 1.855395 | 6.462048 | 0.000927 | 0.080027 | -0.02867 |
| NONHSAT196346.1   | 1.622067 | 2.010872 | 6.457688 | 0.00093  | 0.080027 | -0.03197 |
| NONHSAT214249.1   | -1.11439 | 4.082097 | -6.45683 | 0.00093  | 0.080027 | -0.03261 |
| lnc-MRPS14-4:1    | -1.01248 | 4.07195  | -6.45434 | 0.000932 | 0.080027 | -0.0345  |
| lnc-FOXO4-5:1     | -1.04693 | 5.445051 | -6.45352 | 0.000933 | 0.080027 | -0.03512 |
| lnc-JUN-2:8       | 1.107324 | 5.622691 | 6.451976 | 0.000934 | 0.080027 | -0.03629 |
| lnc-POU3F3-13:1   | 1.397397 | 1.925329 | 6.45188  | 0.000934 | 0.080027 | -0.03636 |
| lnc-RASGRF1-3:1   | 1.600539 | 4.322294 | 6.451151 | 0.000935 | 0.080027 | -0.03691 |
| lnc-ENDOD1-3:1    | -1.85729 | 2.744466 | -6.4488  | 0.000936 | 0.080027 | -0.03869 |
| lnc-PTGS2-3:1     | -1.61922 | 2.90338  | -6.44185 | 0.000941 | 0.080085 | -0.04396 |
| MSTRG.46712.1     | -1.03377 | 3.551295 | -6.43933 | 0.000943 | 0.080105 | -0.04587 |
| NONHSAT169970.1   | -1.74889 | 2.796011 | -6.4354  | 0.000946 | 0.080105 | -0.04885 |
| ENST00000655948.1 | -1.68049 | 2.06507  | -6.4315  | 0.000949 | 0.080105 | -0.05181 |
| NONHSAT187789.1   | -1.50618 | 2.125271 | -6.42701 | 0.000952 | 0.080105 | -0.05523 |
| lnc-KBTBD12-1:1   | -1.27797 | 2.392583 | -6.42694 | 0.000952 | 0.080105 | -0.05528 |
| lnc-PPP1R3B-3:1   | -1.08314 | 1.798044 | -6.42549 | 0.000953 | 0.080105 | -0.05638 |
| lnc-CIAPIN1-2:1   | -1.99489 | 2.364052 | -6.41632 | 0.00096  | 0.080312 | -0.06336 |
| NONHSAT214718.1   | -1.62942 | 2.467703 | -6.40285 | 0.00097  | 0.080455 | -0.07363 |
| NONHSAT209098.1   | -1.44399 | 1.993352 | -6.39357 | 0.000977 | 0.080455 | -0.08071 |
| lnc-C8orf86-3:1   | -1.39752 | 2.025181 | -6.38761 | 0.000981 | 0.080455 | -0.08527 |
| NONHSAT202334.1   | 1.665086 | 2.202561 | 6.386845 | 0.000982 | 0.080455 | -0.08585 |
| lnc-MPPE1-14:1    | -1.20307 | 5.335332 | -6.38679 | 0.000982 | 0.080455 | -0.08589 |
| NONHSAT221042.1   | 1.104405 | 3.423859 | 6.384727 | 0.000983 | 0.080455 | -0.08747 |

|                   |          |          |          |          |          |          |
|-------------------|----------|----------|----------|----------|----------|----------|
| ENST00000419613.1 | -1.40811 | 4.376354 | -6.38064 | 0.000986 | 0.080455 | -0.0906  |
| NONHSAT167388.1   | -1.38819 | 6.354657 | -6.38027 | 0.000987 | 0.080455 | -0.09088 |
| lnc-AKT1-3:1      | -1.32721 | 8.622397 | -6.37831 | 0.000988 | 0.080455 | -0.09238 |
| NR_001560         | -1.09724 | 4.278544 | -6.37683 | 0.000989 | 0.080455 | -0.09352 |
| NONHSAT213024.1   | -1.50088 | 2.30272  | -6.37681 | 0.000989 | 0.080455 | -0.09354 |
| NONHSAT201749.1   | 1.403677 | 1.815377 | 6.369204 | 0.000995 | 0.080455 | -0.09937 |
| lnc-DRD1-3:1      | -1.93185 | 7.360945 | -6.36611 | 0.000998 | 0.080455 | -0.10174 |
| NONHSAT160171.1   | -1.39972 | 1.951583 | -6.36313 | 0.001    | 0.080455 | -0.10403 |
| lnc-AHCTF1-4:1    | -1.6956  | 2.847281 | -6.35987 | 0.001002 | 0.080455 | -0.10653 |
| lnc-CEP128-2:1    | 2.619351 | 3.191546 | 6.359793 | 0.001003 | 0.080455 | -0.10659 |
| NONHSAT185502.1   | 2.442669 | 2.845071 | 6.356344 | 0.001005 | 0.080455 | -0.10924 |
| lnc-NTMT1-7:2     | 1.53622  | 1.89976  | 6.355156 | 0.001006 | 0.080455 | -0.11016 |
| MSTRG.25374.4     | -1.74965 | 2.452854 | -6.35226 | 0.001008 | 0.080455 | -0.11238 |
| NONHSAT210501.1   | 1.887356 | 2.090285 | 6.339898 | 0.001018 | 0.080455 | -0.1219  |
| NONHSAT207648.1   | -1.43081 | 2.627142 | -6.33858 | 0.001019 | 0.080455 | -0.12291 |
| NONHSAT205640.1   | -1.69748 | 2.171848 | -6.32978 | 0.001026 | 0.080455 | -0.12971 |
| NONHSAT162565.1   | -1.75755 | 2.561029 | -6.32561 | 0.001029 | 0.080455 | -0.13292 |
| ENST00000435108.1 | 1.841366 | 7.254913 | 6.322231 | 0.001032 | 0.080455 | -0.13554 |
| lnc-PCDH19-7:1    | 1.491296 | 1.884256 | 6.320415 | 0.001034 | 0.080455 | -0.13694 |
| T152001           | 1.250588 | 1.687711 | 6.319571 | 0.001034 | 0.080455 | -0.13759 |
| lnc-ZNF717-5:1    | -1.15757 | 5.276948 | -6.31927 | 0.001034 | 0.080455 | -0.13782 |
| lnc-C15orf41-2:4  | 1.266424 | 1.918799 | 6.317521 | 0.001036 | 0.080455 | -0.13918 |
| lnc-SAP30-1:2     | 1.44576  | 2.065335 | 6.3144   | 0.001038 | 0.080455 | -0.14159 |
| T117800           | 1.115036 | 5.186055 | 6.313212 | 0.001039 | 0.080455 | -0.14251 |
| lnc-PTPN23-2:1    | 1.108759 | 1.598791 | 6.312713 | 0.00104  | 0.080455 | -0.1429  |
| MSTRG.42199.1     | -1.25722 | 2.945135 | -6.30914 | 0.001043 | 0.080455 | -0.14566 |
| lnc-DPYS-1:2      | 1.007674 | 3.280977 | 6.307664 | 0.001044 | 0.080455 | -0.14681 |
| lnc-MAEA-1:2      | -1.65502 | 2.735702 | -6.29032 | 0.001058 | 0.080455 | -0.16026 |
| NONHSAT166171.1   | -1.43766 | 1.853384 | -6.28822 | 0.00106  | 0.080455 | -0.16189 |
| lnc-ACE-5:1       | -1.38528 | 3.902395 | -6.28804 | 0.00106  | 0.080455 | -0.16204 |
| NONHSAT192124.1   | -1.35283 | 4.04956  | -6.28757 | 0.00106  | 0.080455 | -0.1624  |
| lnc-TIMM21-7:1    | -1.01318 | 8.312757 | -6.28617 | 0.001061 | 0.080475 | -0.16349 |
| NONHSAT149069.1   | -1.80128 | 2.883328 | -6.27872 | 0.001068 | 0.080651 | -0.16928 |
| ENST00000669729.1 | -1.07931 | 7.189595 | -6.27803 | 0.001068 | 0.080651 | -0.16982 |
| lnc-MPDZ-4:1      | -1.57292 | 5.768241 | -6.27537 | 0.00107  | 0.080651 | -0.17189 |
| lnc-ZNF316-3:11   | 2.010528 | 2.860933 | 6.274978 | 0.001071 | 0.080651 | -0.1722  |
| NONHSAT160022.1   | 1.288413 | 8.865674 | 6.273726 | 0.001072 | 0.080651 | -0.17317 |
| lnc-RDH13-2:9     | 1.929546 | 2.16938  | 6.268587 | 0.001076 | 0.080651 | -0.17718 |
| ENST00000606924.1 | 1.610132 | 4.390633 | 6.268464 | 0.001076 | 0.080651 | -0.17727 |
| NR_033379         | -1.23782 | 4.488561 | -6.26223 | 0.001082 | 0.080651 | -0.18213 |
| lnc-ALG10B-3:2    | 1.945326 | 2.689126 | 6.260088 | 0.001083 | 0.080651 | -0.18381 |
| lnc-ERP44-4:1     | -1.04823 | 5.715719 | -6.25905 | 0.001084 | 0.080651 | -0.18462 |
| lnc-KCNE1B-6:1    | -1.41527 | 2.242946 | -6.2585  | 0.001085 | 0.080651 | -0.18505 |
| NONHSAT208391.1   | -1.76097 | 1.993114 | -6.25613 | 0.001087 | 0.080651 | -0.1869  |
| lnc-MAST2-5:1     | -1.31456 | 6.248346 | -6.25484 | 0.001088 | 0.080651 | -0.18791 |
| ENST00000655870.1 | 1.235237 | 2.222092 | 6.242246 | 0.001099 | 0.080771 | -0.19775 |
| lnc-EDEM2-2:2     | 1.580681 | 4.958621 | 6.240085 | 0.0011   | 0.080771 | -0.19945 |
| NONHSAT210240.1   | 1.076444 | 1.648142 | 6.239822 | 0.001101 | 0.080771 | -0.19965 |

|                   |          |          |          |          |          |          |
|-------------------|----------|----------|----------|----------|----------|----------|
| ENST00000661935.1 | 1.345799 | 5.6575   | 6.235953 | 0.001104 | 0.080771 | -0.20268 |
| NR_047550         | -1.13251 | 5.703739 | -6.2355  | 0.001104 | 0.080771 | -0.20304 |
| MSTRG.33672.1     | -1.45372 | 2.165657 | -6.22987 | 0.001109 | 0.080771 | -0.20745 |
| lnc-HIF1AN-5:1    | 1.901536 | 2.051573 | 6.227719 | 0.001111 | 0.080771 | -0.20914 |
| lnc-GLE1-1:3      | 1.411459 | 3.877114 | 6.227611 | 0.001111 | 0.080771 | -0.20922 |
| lnc-CLSTN1-7:2    | -1.97028 | 5.762558 | -6.22614 | 0.001113 | 0.080771 | -0.21038 |
| T265427           | 1.399649 | 2.00344  | 6.226129 | 0.001113 | 0.080771 | -0.21039 |
| NONHSAT218418.1   | 2.086574 | 2.344904 | 6.224795 | 0.001114 | 0.080771 | -0.21143 |
| NONHSAT204179.1   | -1.12946 | 2.946592 | -6.22369 | 0.001115 | 0.080771 | -0.2123  |
| lnc-LY6H-4:1      | -1.27541 | 8.426837 | -6.21643 | 0.001121 | 0.080771 | -0.218   |
| ENST00000668852.1 | -1.69058 | 2.571143 | -6.21642 | 0.001121 | 0.080771 | -0.21801 |
| ENST00000572811.1 | 1.50641  | 2.050164 | 6.216281 | 0.001121 | 0.080771 | -0.21812 |
| lnc-ENOPH1-1:1    | 1.199258 | 3.777143 | 6.215863 | 0.001122 | 0.080771 | -0.21845 |
| NONHSAT220197.1   | -1.04934 | 7.078574 | -6.21557 | 0.001122 | 0.080771 | -0.21868 |
| lnc-CD8B-3:2      | 1.065808 | 6.091931 | 6.210962 | 0.001126 | 0.080771 | -0.22231 |
| T283285           | 1.715401 | 4.069822 | 6.210393 | 0.001126 | 0.080771 | -0.22275 |
| NONHSAT218613.1   | -1.66237 | 2.110417 | -6.20912 | 0.001128 | 0.080771 | -0.22376 |
| lnc-OR10K1-1:1    | -1.35216 | 4.744986 | -6.2087  | 0.001128 | 0.080771 | -0.22409 |
| NONHSAT214398.1   | -1.90744 | 3.53674  | -6.20621 | 0.00113  | 0.080771 | -0.22604 |
| MSTRG.28178.1     | 1.179181 | 3.473602 | 6.201232 | 0.001135 | 0.080795 | -0.22997 |
| lnc-FAM25C-7:1    | 1.679496 | 1.902708 | 6.194491 | 0.001141 | 0.081103 | -0.23528 |
| lnc-ATXN7-15:1    | 2.263069 | 2.60419  | 6.185294 | 0.001149 | 0.08117  | -0.24254 |
| LINC01384:1       | -1.45045 | 4.122104 | -6.18452 | 0.00115  | 0.08117  | -0.24315 |
| ENST00000560339.2 | -1.20203 | 1.893495 | -6.17908 | 0.001155 | 0.081178 | -0.24745 |
| lnc-IL2RA-2:1     | 1.343632 | 4.971189 | 6.17836  | 0.001155 | 0.081178 | -0.24802 |
| NONHSAT217928.1   | -1.232   | 10.55106 | -6.17576 | 0.001158 | 0.081266 | -0.25008 |
| lnc-NDUFB4-3:1    | -1.24561 | 2.714371 | -6.17278 | 0.00116  | 0.081266 | -0.25244 |
| lnc-RASEF-4:1     | -1.23623 | 2.114702 | -6.16533 | 0.001167 | 0.081266 | -0.25834 |
| NR_027097         | -1.04496 | 4.127058 | -6.16287 | 0.00117  | 0.081266 | -0.26029 |
| ENST00000558375.1 | -1.36237 | 2.034779 | -6.15846 | 0.001174 | 0.081266 | -0.26379 |
| NONHSAT162834.1   | 1.677907 | 1.92332  | 6.153073 | 0.001179 | 0.081384 | -0.26806 |
| MSTRG.12842.1     | -1.24636 | 2.035174 | -6.14886 | 0.001183 | 0.081508 | -0.27141 |
| MSTRG.59583.3     | 1.630488 | 1.88861  | 6.142055 | 0.001189 | 0.081688 | -0.27682 |
| NONHSAT199678.1   | -1.34297 | 6.283403 | -6.14179 | 0.001189 | 0.081688 | -0.27703 |
| MSTRG.54671.1     | 1.534739 | 1.853117 | 6.13453  | 0.001196 | 0.082049 | -0.28281 |
| T081667           | 1.996549 | 2.013026 | 6.130078 | 0.0012   | 0.082093 | -0.28636 |
| NONHSAT204732.1   | -1.21699 | 1.822819 | -6.11919 | 0.001211 | 0.082163 | -0.29504 |
| lnc-CCM2-4:1      | -1.53442 | 7.89677  | -6.10986 | 0.00122  | 0.082345 | -0.3025  |
| ENST00000541885.1 | 2.399151 | 2.944714 | 6.099385 | 0.00123  | 0.082513 | -0.31088 |
| ENST00000569242.1 | -1.48161 | 7.20146  | -6.09769 | 0.001232 | 0.082513 | -0.31224 |
| lnc-XRCC4-3:1     | 1.183344 | 3.303216 | 6.093109 | 0.001236 | 0.082513 | -0.31591 |
| NONHSAT150603.1   | -1.88868 | 4.657205 | -6.09232 | 0.001237 | 0.082513 | -0.31654 |
| NONHSAT168114.1   | -1.09853 | 3.183222 | -6.09144 | 0.001238 | 0.082513 | -0.31725 |
| lnc-AZIN1-6:1     | 1.359784 | 2.337557 | 6.088969 | 0.00124  | 0.082513 | -0.31923 |
| lnc-GLP1R-1:1     | 1.139019 | 4.798514 | 6.08884  | 0.001241 | 0.082513 | -0.31934 |
| NONHSAT194307.1   | 1.562748 | 2.016885 | 6.07783  | 0.001252 | 0.082888 | -0.32818 |
| lnc-CWH43-4:1     | -1.21363 | 16.05626 | -6.07454 | 0.001255 | 0.082888 | -0.33082 |
| ENST00000584361.1 | -1.106   | 4.306297 | -6.07119 | 0.001258 | 0.082888 | -0.33352 |

|                   |          |          |          |          |          |          |
|-------------------|----------|----------|----------|----------|----------|----------|
| NONHSAT216070.1   | -1.00298 | 6.935518 | -6.07043 | 0.001259 | 0.082888 | -0.33413 |
| ENST00000609268.2 | 1.137601 | 2.099009 | 6.067856 | 0.001262 | 0.082888 | -0.3362  |
| lnc-TMEM130-1:3   | -1.0627  | 7.038329 | -6.05779 | 0.001272 | 0.083122 | -0.34431 |
| NONHSAT180563.1   | 1.021206 | 8.674477 | 6.054011 | 0.001276 | 0.083191 | -0.34736 |
| NONHSAT197059.1   | 1.571894 | 1.879539 | 6.053382 | 0.001276 | 0.083191 | -0.34787 |
| lnc-NMBR-4:1      | -1.00515 | 3.400737 | -6.04233 | 0.001288 | 0.083502 | -0.35679 |
| NONHSAT204602.1   | 1.620077 | 1.870931 | 6.038475 | 0.001292 | 0.083708 | -0.35991 |
| LINC00324:3       | 1.185533 | 10.49104 | 6.035892 | 0.001294 | 0.083774 | -0.362   |
| lnc-PNMA2-2:8     | 1.369698 | 7.354418 | 6.031143 | 0.001299 | 0.08388  | -0.36584 |
| NR_038888         | -1.75033 | 3.819279 | -6.02902 | 0.001302 | 0.083929 | -0.36757 |
| MSTRG.64181.1     | -1.08026 | 9.338793 | -6.0276  | 0.001303 | 0.083929 | -0.36871 |
| NONHSAT182249.1   | 1.015816 | 1.680461 | 6.024324 | 0.001307 | 0.083929 | -0.37137 |
| ENST00000625026.1 | -1.673   | 2.618559 | -6.02365 | 0.001307 | 0.083929 | -0.37192 |
| lnc-ATAD1-5:4     | 1.729364 | 2.292265 | 6.023179 | 0.001308 | 0.083929 | -0.3723  |
| NONHSAT198196.1   | -1.09604 | 7.228192 | -6.02216 | 0.001309 | 0.083929 | -0.37313 |
| NONHSAT195908.1   | -1.86141 | 2.365651 | -6.02193 | 0.001309 | 0.083929 | -0.37331 |
| ENST00000445039.2 | -1.01745 | 3.760142 | -6.02068 | 0.00131  | 0.083946 | -0.37432 |
| MSTRG.55873.1     | 1.461456 | 1.961867 | 6.018405 | 0.001313 | 0.084007 | -0.37617 |
| NONHSAT169902.1   | 1.80339  | 2.269367 | 6.011837 | 0.00132  | 0.084112 | -0.3815  |
| NONHSAT214664.1   | -1.08325 | 6.322935 | -6.00987 | 0.001322 | 0.084112 | -0.3831  |
| lnc-ZC3H12D-2:2   | 1.629105 | 1.930167 | 6.009338 | 0.001322 | 0.084112 | -0.38353 |
| NONHSAT178438.1   | 2.564374 | 2.46913  | 6.008767 | 0.001323 | 0.084112 | -0.384   |
| lnc-SEN1-6:2      | 1.72719  | 2.587996 | 6.002674 | 0.00133  | 0.084301 | -0.38895 |
| NONHSAT162586.1   | -1.54505 | 2.115051 | -6.00071 | 0.001332 | 0.084347 | -0.39055 |
| ENST00000649594.1 | 2.502184 | 2.353275 | 5.999113 | 0.001333 | 0.084403 | -0.39185 |
| lnc-CAPN14-2:1    | -1.35498 | 1.801905 | -5.99566 | 0.001337 | 0.084461 | -0.39466 |
| NONHSAT166899.1   | 1.484029 | 1.983003 | 5.980861 | 0.001353 | 0.084935 | -0.40673 |
| NONHSAT173282.1   | 1.195456 | 1.73963  | 5.972542 | 0.001362 | 0.084966 | -0.41353 |
| NONHSAT181891.1   | 1.210479 | 2.861823 | 5.972483 | 0.001363 | 0.084966 | -0.41357 |
| MSTRG.41610.78    | 1.09568  | 1.599579 | 5.967765 | 0.001368 | 0.085186 | -0.41743 |
| NONHSAT182872.1   | -1.77319 | 2.01515  | -5.96527 | 0.001371 | 0.085204 | -0.41947 |
| NONHSAT201694.1   | 2.312414 | 2.473996 | 5.964474 | 0.001371 | 0.085204 | -0.42013 |
| NONHSAT154599.1   | 1.099803 | 3.141728 | 5.95684  | 0.00138  | 0.085438 | -0.42638 |
| NONHSAT153965.1   | 1.032249 | 1.768401 | 5.954234 | 0.001383 | 0.085442 | -0.42851 |
| LINC02271:7       | -1.0076  | 3.848079 | -5.9518  | 0.001386 | 0.085457 | -0.43051 |
| NONHSAT207754.1   | 1.090595 | 1.576083 | 5.948718 | 0.001389 | 0.085506 | -0.43304 |
| lnc-EFHB-3:1      | -1.18903 | 8.308393 | -5.94766 | 0.00139  | 0.085506 | -0.43391 |
| lnc-CEP95-4:1     | 1.274484 | 4.786982 | 5.947046 | 0.001391 | 0.085506 | -0.43441 |
| lnc-FSHB-8:1      | -1.10503 | 7.120293 | -5.94576 | 0.001393 | 0.085506 | -0.43546 |
| lnc-SLFN14-1:1    | -2.39848 | 4.171954 | -5.94403 | 0.001394 | 0.085527 | -0.43689 |
| NONHSAT159699.1   | 1.556838 | 1.90994  | 5.942819 | 0.001396 | 0.085559 | -0.43788 |
| MSTRG.40285.1     | 1.392292 | 1.859237 | 5.936533 | 0.001403 | 0.085668 | -0.44305 |
| MSTRG.55846.1     | -1.63596 | 2.26679  | -5.93322 | 0.001407 | 0.085668 | -0.44577 |
| lnc-RTN4R-1:5     | 1.481694 | 1.860472 | 5.929018 | 0.001412 | 0.08573  | -0.44923 |
| NONHSAT156709.1   | 1.454524 | 2.269511 | 5.927517 | 0.001413 | 0.08573  | -0.45047 |
| lnc-SLC47A1-4:1   | -1.36613 | 9.34374  | -5.92704 | 0.001414 | 0.08573  | -0.45086 |
| lnc-TP53TG3F-17:1 | 2.829342 | 2.430639 | 5.920834 | 0.001421 | 0.085991 | -0.45597 |
| ENST00000658524.1 | 1.002302 | 1.543473 | 5.920381 | 0.001422 | 0.085991 | -0.45635 |

|                   |          |          |          |          |          |          |
|-------------------|----------|----------|----------|----------|----------|----------|
| NONHSAT177001.1   | 1.584216 | 3.428124 | 5.91722  | 0.001425 | 0.086103 | -0.45895 |
| lnc-FEV-4:1       | -1.47986 | 5.782893 | -5.91172 | 0.001432 | 0.08621  | -0.46349 |
| NONHSAT150369.1   | -1.50992 | 2.158107 | -5.91069 | 0.001433 | 0.08621  | -0.46434 |
| lnc-PAIP2-4:1     | -1.91938 | 2.57114  | -5.90375 | 0.001441 | 0.086407 | -0.47007 |
| lnc-TBL1Y-1:1     | 2.81313  | 4.47821  | 5.902785 | 0.001442 | 0.086407 | -0.47087 |
| lnc-SLC30A5-5:1   | -1.39989 | 5.366735 | -5.90209 | 0.001443 | 0.086407 | -0.47145 |
| LINC01058:4       | -1.7966  | 2.785189 | -5.8977  | 0.001448 | 0.08641  | -0.47508 |
| MSTRG.1334.12     | -1.48326 | 2.132159 | -5.88443 | 0.001464 | 0.086891 | -0.48607 |
| NONHSAT167776.1   | -1.02622 | 4.050191 | -5.88341 | 0.001465 | 0.086891 | -0.48692 |
| lnc-CENPP-12:1    | -1.13779 | 10.59182 | -5.88303 | 0.001466 | 0.086891 | -0.48723 |
| lnc-HMGB2-8:1     | -1.45871 | 2.54421  | -5.88274 | 0.001466 | 0.086891 | -0.48747 |
| ENST00000517623.1 | 1.320853 | 2.075791 | 5.882296 | 0.001467 | 0.086891 | -0.48784 |
| NONHSAT168303.1   | 1.138288 | 1.656218 | 5.882195 | 0.001467 | 0.086891 | -0.48792 |
| MSTRG.39584.1     | -1.32102 | 1.983604 | -5.88144 | 0.001468 | 0.086891 | -0.48855 |
| MSTRG.58001.1     | -1.06903 | 3.586593 | -5.87805 | 0.001472 | 0.086891 | -0.49137 |
| lnc-PAX5-7:1      | -1.77712 | 4.122163 | -5.87596 | 0.001474 | 0.086954 | -0.4931  |
| lnc-ACTRT1-3:1    | -1.45523 | 3.680788 | -5.87226 | 0.001479 | 0.086989 | -0.49617 |
| MSTRG.66186.1     | -1.05911 | 3.823786 | -5.87122 | 0.00148  | 0.086989 | -0.49703 |
| NONHSAT157663.1   | 1.927851 | 1.990171 | 5.870986 | 0.00148  | 0.086989 | -0.49723 |
| lnc-RGS18-11:1    | -1.4853  | 6.32027  | -5.86746 | 0.001485 | 0.08714  | -0.50016 |
| ENST00000566876.1 | 1.386965 | 1.754391 | 5.858608 | 0.001496 | 0.087474 | -0.50753 |
| MSTRG.9065.1      | 1.879375 | 2.32191  | 5.857524 | 0.001497 | 0.087474 | -0.50843 |
| NONHSAT165812.1   | -1.0631  | 3.579662 | -5.85648 | 0.001498 | 0.087474 | -0.50929 |
| NONHSAT164702.1   | 1.434036 | 4.339561 | 5.854569 | 0.001501 | 0.087561 | -0.51089 |
| ENST00000605480.1 | -1.52505 | 2.728367 | -5.847   | 0.00151  | 0.087569 | -0.5172  |
| T307868           | 1.310217 | 5.027017 | 5.845454 | 0.001512 | 0.087569 | -0.51849 |
| ENST00000414816.1 | -1.23339 | 3.854776 | -5.84445 | 0.001513 | 0.087569 | -0.51933 |
| lnc-INTS6-4:1     | -1.21107 | 11.47419 | -5.84223 | 0.001516 | 0.087569 | -0.52118 |
| ENST00000579033.1 | 1.081814 | 1.618215 | 5.837404 | 0.001522 | 0.087569 | -0.52521 |
| lnc-KCNS3-1:1     | 1.149556 | 6.1857   | 5.837337 | 0.001522 | 0.087569 | -0.52527 |
| lnc-ARHGAP12-2:2  | 1.251033 | 1.656918 | 5.836103 | 0.001524 | 0.087569 | -0.5263  |
| NONHSAT200046.1   | -1.09633 | 3.530652 | -5.835   | 0.001525 | 0.087569 | -0.52722 |
| T325176           | -1.56049 | 2.35117  | -5.83172 | 0.001529 | 0.087748 | -0.52996 |
| T160707           | 2.870454 | 2.478598 | 5.831146 | 0.00153  | 0.087748 | -0.53044 |
| lnc-MRPS18A-4:1   | -1.47968 | 3.34976  | -5.82398 | 0.001539 | 0.08797  | -0.53644 |
| MSTRG.22399.2     | -1.09581 | 4.053402 | -5.82172 | 0.001542 | 0.088067 | -0.53833 |
| NONHSAT177949.1   | 1.723509 | 1.943574 | 5.819234 | 0.001545 | 0.088067 | -0.54041 |
| MSTRG.23214.5     | 2.061931 | 2.513435 | 5.808622 | 0.001559 | 0.088461 | -0.54931 |
| lnc-COPS4-1:1     | 1.031275 | 6.160111 | 5.807561 | 0.00156  | 0.088461 | -0.5502  |
| ENST00000329015.2 | -1.00373 | 2.906489 | -5.80721 | 0.001561 | 0.088461 | -0.5505  |
| lnc-C1QTNF9B-3:1  | 1.818734 | 2.622112 | 5.805363 | 0.001563 | 0.088461 | -0.55205 |
| lnc-PCDH9-12:1    | -1.64818 | 3.868501 | -5.80328 | 0.001566 | 0.088461 | -0.5538  |
| lnc-AMN1-2:6      | -1.28924 | 2.272158 | -5.80238 | 0.001567 | 0.088461 | -0.55455 |
| lnc-ATP6V1D-8:4   | -1.44191 | 1.994188 | -5.80062 | 0.001569 | 0.088514 | -0.55604 |
| ENST00000667440.1 | 1.637457 | 4.281873 | 5.800247 | 0.00157  | 0.088514 | -0.55635 |
| NONHSAT224251.1   | -1.84696 | 2.656736 | -5.79653 | 0.001574 | 0.08852  | -0.55948 |
| NONHSAT160952.1   | -1.10431 | 2.668456 | -5.79363 | 0.001578 | 0.08852  | -0.56191 |
| lnc-RCL1-2:1      | 1.352678 | 1.768875 | 5.792156 | 0.00158  | 0.08852  | -0.56315 |

|                   |          |          |          |          |          |          |
|-------------------|----------|----------|----------|----------|----------|----------|
| lnc-SLC25A48-3:3  | 1.030073 | 1.99859  | 5.791705 | 0.001581 | 0.08852  | -0.56353 |
| lnc-BNC2-4:1      | -1.57601 | 3.804866 | -5.79027 | 0.001583 | 0.08852  | -0.56474 |
| NONHSAT166981.1   | -1.37345 | 1.985071 | -5.78911 | 0.001584 | 0.08852  | -0.56571 |
| ENST00000445300.1 | 1.464996 | 4.08549  | 5.788335 | 0.001585 | 0.08852  | -0.56637 |
| NR_037584         | -1.00319 | 2.103483 | -5.78471 | 0.00159  | 0.088602 | -0.56942 |
| MSTRG.25854.6     | 1.303321 | 3.61632  | 5.784421 | 0.00159  | 0.088602 | -0.56967 |
| lnc-RAD54L-4:1    | 1.22948  | 3.659166 | 5.784337 | 0.00159  | 0.088602 | -0.56974 |
| lnc-DYDC1-9:1     | -1.29383 | 6.095168 | -5.78231 | 0.001593 | 0.088671 | -0.57145 |
| MSTRG.51008.21    | 2.419938 | 2.398071 | 5.78197  | 0.001594 | 0.088671 | -0.57173 |
| lnc-TCEANC-3:1    | -1.88051 | 4.143926 | -5.77618 | 0.001601 | 0.088739 | -0.57661 |
| lnc-ATP6AP2-9:1   | -1.27496 | 2.001361 | -5.7758  | 0.001602 | 0.088739 | -0.57694 |
| ENST00000614876.1 | -1.84121 | 2.314453 | -5.76859 | 0.001611 | 0.08881  | -0.58302 |
| MSTRG.14682.2     | 1.188182 | 2.020895 | 5.768592 | 0.001611 | 0.08881  | -0.58302 |
| lnc-ADSS-6:1      | -1.25101 | 11.03163 | -5.76604 | 0.001615 | 0.08881  | -0.58518 |
| NR_024608         | -1.15832 | 6.363302 | -5.76591 | 0.001615 | 0.08881  | -0.58529 |
| NONHSAT162616.1   | -1.03312 | 5.677731 | -5.76456 | 0.001617 | 0.08881  | -0.58643 |
| lnc-EPHA7-5:1     | -1.15424 | 3.072885 | -5.76387 | 0.001618 | 0.08881  | -0.58702 |
| lnc-FERD3L-1:1    | -1.2837  | 2.211452 | -5.76257 | 0.00162  | 0.08881  | -0.58811 |
| lnc-FGF23-5:3     | 1.14778  | 6.757047 | 5.758758 | 0.001625 | 0.088885 | -0.59134 |
| lnc-CYP24A1-3:1   | -1.01988 | 9.484978 | -5.75492 | 0.00163  | 0.088885 | -0.59458 |
| lnc-PMEPA1-2:1    | -1.2932  | 2.815434 | -5.75108 | 0.001635 | 0.088885 | -0.59784 |
| lnc-CRYBB1-4:5    | 1.497043 | 3.865764 | 5.749988 | 0.001637 | 0.088885 | -0.59876 |
| MSTRG.54885.1     | 1.316706 | 4.584676 | 5.748916 | 0.001638 | 0.088885 | -0.59967 |
| T076734           | -1.52111 | 2.632797 | -5.74817 | 0.001639 | 0.088885 | -0.6003  |
| T048538           | 1.00513  | 5.085518 | 5.745931 | 0.001642 | 0.088885 | -0.6022  |
| lnc-RBMX2-3:1     | -1.25586 | 1.793213 | -5.74191 | 0.001648 | 0.089088 | -0.60561 |
| MSTRG.4903.1      | 1.948531 | 2.45309  | 5.740844 | 0.001649 | 0.089101 | -0.60652 |
| NONHSAT197967.1   | -1.07177 | 4.696964 | -5.74046 | 0.00165  | 0.089101 | -0.60685 |
| ENST00000449805.2 | 1.003954 | 5.865412 | 5.735844 | 0.001656 | 0.089264 | -0.61076 |
| ENST00000416430.1 | 1.358044 | 1.804346 | 5.735721 | 0.001656 | 0.089264 | -0.61087 |
| lnc-IQCF3-1:4     | 1.734782 | 2.464553 | 5.733449 | 0.00166  | 0.089296 | -0.6128  |
| ENST00000500076.2 | -2.12394 | 2.500333 | -5.73141 | 0.001662 | 0.089348 | -0.61453 |
| NONHSAT219924.1   | -1.39533 | 1.788482 | -5.72793 | 0.001667 | 0.089466 | -0.61749 |
| ENST00000664048.1 | -1.36452 | 1.792011 | -5.72425 | 0.001672 | 0.089502 | -0.62062 |
| lnc-SLC10A7-4:1   | -2.07112 | 2.120172 | -5.7237  | 0.001673 | 0.089502 | -0.62109 |
| T055045           | 1.360203 | 1.698711 | 5.722252 | 0.001675 | 0.089502 | -0.62232 |
| NONHSAT176767.1   | 2.65761  | 2.430094 | 5.720504 | 0.001678 | 0.089502 | -0.62381 |
| lnc-CANT1-3:3     | -1.02227 | 3.440283 | -5.71794 | 0.001681 | 0.089533 | -0.62599 |
| ENST00000669616.1 | 1.129618 | 2.736922 | 5.715555 | 0.001685 | 0.089542 | -0.62802 |
| ENST00000552324.1 | -2.39523 | 4.435686 | -5.71483 | 0.001686 | 0.08955  | -0.62864 |
| NONHSAT191551.1   | -1.40832 | 2.710216 | -5.70705 | 0.001697 | 0.089846 | -0.63527 |
| NONHSAT158118.1   | -1.57357 | 3.973769 | -5.7045  | 0.0017   | 0.089846 | -0.63745 |
| NONHSAT178987.1   | 1.595418 | 4.177146 | 5.704014 | 0.001701 | 0.089846 | -0.63786 |
| MSTRG.5229.1      | 1.339139 | 3.51467  | 5.703982 | 0.001701 | 0.089846 | -0.63789 |
| lnc-MAP3K9-3:29   | 1.229725 | 5.458542 | 5.703932 | 0.001701 | 0.089846 | -0.63793 |
| lnc-SEMA6D-3:1    | -1.59223 | 5.592901 | -5.7034  | 0.001702 | 0.089846 | -0.63839 |
| MSTRG.36418.1     | -1.05884 | 4.581389 | -5.69816 | 0.001709 | 0.090054 | -0.64286 |
| MSTRG.53302.1     | 1.227629 | 3.461402 | 5.697504 | 0.00171  | 0.090057 | -0.64342 |

|                   |          |          |          |          |          |          |
|-------------------|----------|----------|----------|----------|----------|----------|
| lnc-FEZ2-6:1      | -1.19445 | 4.758367 | -5.69546 | 0.001713 | 0.090081 | -0.64517 |
| MSTRG.21093.1     | 1.484644 | 2.729737 | 5.690589 | 0.00172  | 0.090206 | -0.64934 |
| NR_002147         | 1.223598 | 4.609851 | 5.688601 | 0.001723 | 0.09031  | -0.65104 |
| NONHSAT176820.1   | 1.803327 | 2.442742 | 5.684844 | 0.001729 | 0.090503 | -0.65426 |
| NONHSAT204943.1   | -1.53322 | 2.225626 | -5.68294 | 0.001731 | 0.090507 | -0.65588 |
| NONHSAT186899.1   | 1.858058 | 2.029279 | 5.68028  | 0.001735 | 0.090541 | -0.65816 |
| NONHSAT154535.1   | -1.62793 | 7.440364 | -5.67647 | 0.001741 | 0.090627 | -0.66143 |
| ENST00000317596.3 | -1.27341 | 3.289385 | -5.67049 | 0.00175  | 0.090873 | -0.66656 |
| lnc-ABI1-11:1     | 2.847381 | 3.587251 | 5.66648  | 0.001756 | 0.090873 | -0.67    |
| NONHSAT221718.1   | 1.097677 | 4.220507 | 5.665491 | 0.001757 | 0.090873 | -0.67085 |
| lnc-GGPS1-17:1    | -1.41187 | 2.118776 | -5.66535 | 0.001757 | 0.090873 | -0.67098 |
| ENST00000608941.1 | 1.060813 | 5.131512 | 5.661569 | 0.001763 | 0.091024 | -0.67422 |
| ENST00000666326.1 | 1.066083 | 4.513307 | 5.661382 | 0.001763 | 0.091024 | -0.67438 |
| MSTRG.14867.1     | -1.02441 | 3.597591 | -5.66018 | 0.001765 | 0.091024 | -0.67541 |
| lnc-ALDH1A1-6:1   | -1.27541 | 8.324934 | -5.65975 | 0.001766 | 0.091024 | -0.67579 |
| NONHSAT161158.1   | -1.42797 | 3.964102 | -5.65798 | 0.001768 | 0.091073 | -0.67731 |
| MSTRG.50492.1     | -1.10254 | 9.765908 | -5.65531 | 0.001772 | 0.091087 | -0.6796  |
| NONHSAT171134.1   | -1.28275 | 4.255824 | -5.64986 | 0.001781 | 0.091111 | -0.68429 |
| NONHSAT165033.1   | 1.2922   | 1.851145 | 5.648044 | 0.001783 | 0.091115 | -0.68586 |
| lnc-CSN2-1:1      | 1.954982 | 2.839151 | 5.646445 | 0.001786 | 0.091115 | -0.68724 |
| NONHSAT172942.1   | 1.321318 | 3.727705 | 5.634905 | 0.001803 | 0.09133  | -0.69719 |
| lnc-ST8SIA4-7:1   | -1.10033 | 8.458752 | -5.63424 | 0.001804 | 0.09133  | -0.69777 |
| lnc-AHR-8:3       | -1.10091 | 4.387378 | -5.63249 | 0.001807 | 0.09133  | -0.69928 |
| lnc-NPAS4-4:1     | 1.370575 | 2.598161 | 5.629162 | 0.001812 | 0.091478 | -0.70215 |
| NONHSAT200276.1   | -1.9234  | 3.806464 | -5.62741 | 0.001815 | 0.091478 | -0.70367 |
| NONHSAT148476.1   | -1.01169 | 7.964154 | -5.62705 | 0.001815 | 0.091478 | -0.70398 |
| NONHSAT173365.1   | 1.240261 | 3.16166  | 5.623176 | 0.001821 | 0.091645 | -0.70733 |
| NONHSAT174328.1   | 1.839551 | 2.077998 | 5.619757 | 0.001827 | 0.091807 | -0.71028 |
| NONHSAT167950.1   | -1.13522 | 8.953678 | -5.61927 | 0.001827 | 0.091807 | -0.7107  |
| lnc-PKD1L3-1:1    | -1.5565  | 3.011837 | -5.61883 | 0.001828 | 0.091807 | -0.71109 |
| MSTRG.61572.1     | 1.026654 | 4.225985 | 5.610881 | 0.001841 | 0.0921   | -0.71797 |
| lnc-ALCAM-9:1     | -1.05317 | 6.331178 | -5.60638 | 0.001848 | 0.092153 | -0.72187 |
| lnc-ZBTB39-2:2    | 1.190778 | 1.882013 | 5.606146 | 0.001848 | 0.092153 | -0.72208 |
| PACRG-AS1:5       | 1.543791 | 1.929274 | 5.604256 | 0.001851 | 0.092255 | -0.72372 |
| MSTRG.52949.1     | 1.359091 | 2.113898 | 5.601761 | 0.001855 | 0.092265 | -0.72588 |
| NONHSAT155210.1   | -1.198   | 1.85655  | -5.60133 | 0.001856 | 0.092265 | -0.72626 |
| MSTRG.9189.2      | -1.60885 | 2.170909 | -5.59762 | 0.001861 | 0.092277 | -0.72948 |
| lnc-ARHGAP6-3:1   | -1.38698 | 2.007069 | -5.59473 | 0.001866 | 0.092277 | -0.73199 |
| lnc-CTAGE5-9:1    | -1.23738 | 8.203932 | -5.59439 | 0.001867 | 0.092277 | -0.73228 |
| ENST00000553410.1 | -1.04963 | 1.746713 | -5.59437 | 0.001867 | 0.092277 | -0.7323  |
| NONHSAT213694.1   | -1.59101 | 1.947513 | -5.59417 | 0.001867 | 0.092277 | -0.73247 |
| lnc-MDM4-12:1     | -1.14271 | 3.729568 | -5.59278 | 0.001869 | 0.092342 | -0.73368 |
| NONHSAT171840.1   | 1.180052 | 2.598808 | 5.588969 | 0.001875 | 0.092381 | -0.73699 |
| NONHSAT218022.1   | -1.36415 | 3.860042 | -5.58883 | 0.001875 | 0.092381 | -0.73711 |
| NONHSAT185560.1   | 1.011413 | 8.22811  | 5.584726 | 0.001882 | 0.092514 | -0.74069 |
| MSTRG.23774.1     | -1.22508 | 4.631088 | -5.58443 | 0.001883 | 0.092514 | -0.74094 |
| ENST00000568110.1 | -1.3522  | 2.561324 | -5.5833  | 0.001884 | 0.092514 | -0.74193 |
| ENST00000649539.1 | 1.606875 | 5.18417  | 5.582348 | 0.001886 | 0.092514 | -0.74276 |

|                   |          |          |          |          |          |          |
|-------------------|----------|----------|----------|----------|----------|----------|
| NONHSAT162363.1   | -1.3841  | 4.209903 | -5.58208 | 0.001886 | 0.092514 | -0.74299 |
| lnc-YAE1D1-4:1    | 1.087209 | 6.391619 | 5.57925  | 0.001891 | 0.092514 | -0.74545 |
| lnc-ADRA1D-2:3    | -1.68208 | 2.115777 | -5.57919 | 0.001891 | 0.092514 | -0.74551 |
| ENST00000658564.1 | -1.41319 | 2.006739 | -5.57918 | 0.001891 | 0.092514 | -0.74552 |
| ENST00000665497.1 | -1.05176 | 7.711229 | -5.57314 | 0.001901 | 0.092693 | -0.75078 |
| NONHSAT170367.1   | -1.03395 | 4.120057 | -5.57243 | 0.001902 | 0.092693 | -0.7514  |
| NONHSAT200961.1   | -1.1945  | 3.840902 | -5.5722  | 0.001902 | 0.092693 | -0.7516  |
| NONHSAT184331.1   | -1.06623 | 4.074049 | -5.57183 | 0.001903 | 0.092693 | -0.75192 |
| ENST00000620143.1 | 1.284289 | 3.749035 | 5.569506 | 0.001907 | 0.092814 | -0.75395 |
| lnc-SLC23A2-1:1   | -1.38275 | 3.615117 | -5.56908 | 0.001907 | 0.092814 | -0.75432 |
| NONHSAT200168.1   | -1.05917 | 8.937655 | -5.56156 | 0.00192  | 0.093197 | -0.76089 |
| lnc-HIST1H2BK-1:1 | 1.475512 | 2.021173 | 5.558707 | 0.001924 | 0.093331 | -0.76338 |
| lnc-LSAMP-4:1     | -1.47385 | 7.840393 | -5.55644 | 0.001928 | 0.093347 | -0.76536 |
| NONHSAT215038.1   | 1.788068 | 2.235769 | 5.556312 | 0.001928 | 0.093347 | -0.76547 |
| lnc-IKZF5-4:1     | 2.233147 | 3.510165 | 5.553745 | 0.001933 | 0.093508 | -0.76772 |
| ENST00000452288.1 | -1.73012 | 2.557269 | -5.54728 | 0.001943 | 0.093803 | -0.77337 |
| DNAJC27-AS1:22    | -1.07212 | 1.800871 | -5.54593 | 0.001946 | 0.093868 | -0.77456 |
| MSTRG.60057.2     | 2.584296 | 3.152338 | 5.54358  | 0.00195  | 0.093869 | -0.77661 |
| MSTRG.66747.1     | -1.56557 | 2.760846 | -5.53979 | 0.001956 | 0.093895 | -0.77993 |
| MSTRG.18129.1     | 1.116432 | 1.805022 | 5.528422 | 0.001975 | 0.094298 | -0.78991 |
| NONHSAT173782.1   | -1.2793  | 2.449493 | -5.52657 | 0.001978 | 0.09437  | -0.79153 |
| lnc-PKHD1-7:1     | -1.71144 | 3.42489  | -5.52362 | 0.001983 | 0.094538 | -0.79413 |
| T356962           | 1.3884   | 1.740145 | 5.523276 | 0.001984 | 0.094538 | -0.79443 |
| lnc-LSM3-5:2      | 1.373315 | 5.784023 | 5.513408 | 0.002001 | 0.094897 | -0.80311 |
| MSTRG.47820.1     | 1.417204 | 2.008352 | 5.512445 | 0.002003 | 0.094926 | -0.80396 |
| NONHSAT214281.1   | 1.382719 | 2.076216 | 5.509291 | 0.002008 | 0.094946 | -0.80674 |
| NONHSAT205841.1   | 1.279819 | 1.696637 | 5.50656  | 0.002013 | 0.094946 | -0.80914 |
| MSTRG.52091.5     | 2.075835 | 2.612061 | 5.506065 | 0.002014 | 0.094946 | -0.80958 |
| T314711           | 1.847752 | 2.615975 | 5.504078 | 0.002017 | 0.094946 | -0.81133 |
| ENST00000655744.1 | 1.460222 | 1.871381 | 5.502117 | 0.00202  | 0.094979 | -0.81306 |
| NONHSAT214440.1   | 1.278332 | 1.835459 | 5.495471 | 0.002032 | 0.095215 | -0.81893 |
| NONHSAT211991.1   | -1.29697 | 1.698228 | -5.49221 | 0.002038 | 0.095319 | -0.8218  |
| ENST00000450486.1 | 1.325808 | 1.841556 | 5.49104  | 0.00204  | 0.095329 | -0.82284 |
| NONHSAT216702.1   | -1.38789 | 4.469377 | -5.49016 | 0.002041 | 0.095343 | -0.82362 |
| ENST00000448256.1 | -1.08688 | 8.984181 | -5.48723 | 0.002047 | 0.095516 | -0.82621 |
| lnc-SLC35F5-10:7  | 1.273373 | 5.899643 | 5.483618 | 0.002053 | 0.09559  | -0.8294  |
| NONHSAT158025.1   | -1.40897 | 2.769489 | -5.48177 | 0.002056 | 0.095595 | -0.83104 |
| lnc-LRRC52-1:1    | -1.0288  | 8.424424 | -5.48119 | 0.002057 | 0.095599 | -0.83155 |
| lnc-TSPAN2-1:1    | 1.302114 | 3.131312 | 5.478219 | 0.002063 | 0.095694 | -0.83418 |
| NONHSAT197326.1   | 1.489203 | 1.839579 | 5.475421 | 0.002068 | 0.095726 | -0.83666 |
| NONHSAT170209.1   | 1.149737 | 6.627289 | 5.473417 | 0.002071 | 0.095769 | -0.83843 |
| NONHSAT206940.1   | -1.29202 | 7.027985 | -5.47301 | 0.002072 | 0.095769 | -0.8388  |
| ENST00000418471.1 | 1.563234 | 2.214542 | 5.471874 | 0.002074 | 0.095769 | -0.8398  |
| lnc-TMEM74-1:2    | 1.117165 | 4.131384 | 5.460988 | 0.002094 | 0.096191 | -0.84946 |
| lnc-SMIM36-1:1    | -1.44581 | 9.650788 | -5.45992 | 0.002096 | 0.096227 | -0.85041 |
| NONHSAT199381.1   | -1.24834 | 1.940755 | -5.45843 | 0.002098 | 0.096245 | -0.85173 |
| lnc-SMARCAD1-1:1  | -1.03669 | 8.628417 | -5.45725 | 0.002101 | 0.096245 | -0.85278 |
| lnc-AASDHPPT-4:1  | 1.031343 | 1.548405 | 5.456561 | 0.002102 | 0.096245 | -0.85339 |



|                   |          |          |          |          |          |          |
|-------------------|----------|----------|----------|----------|----------|----------|
| MSTRG.13498.2     | -1.12207 | 3.60767  | -5.45307 | 0.002108 | 0.096406 | -0.85649 |
| NONHSAT169528.1   | 1.332588 | 4.910885 | 5.451453 | 0.002111 | 0.096406 | -0.85793 |
| lnc-PRRG4-4:1     | -1.53959 | 3.033164 | -5.4513  | 0.002111 | 0.096406 | -0.85807 |
| lnc-TEX47-4:1     | -1.12837 | 2.689087 | -5.44425 | 0.002124 | 0.096417 | -0.86434 |
| NONHSAT210153.1   | 1.145731 | 3.892831 | 5.443605 | 0.002126 | 0.096417 | -0.86491 |
| NONHSAT200029.1   | -1.78249 | 2.548267 | -5.43118 | 0.002149 | 0.096943 | -0.87599 |
| lnc-FSCN2-1:7     | 1.571776 | 3.664921 | 5.428807 | 0.002153 | 0.097033 | -0.87811 |
| MSTRG.57138.1     | -1.17249 | 3.054058 | -5.42328 | 0.002164 | 0.097313 | -0.88304 |
| NONHSAT206663.1   | 1.447806 | 2.415734 | 5.422535 | 0.002165 | 0.097313 | -0.88371 |
| lnc-NR5A2-6:1     | -1.12044 | 3.041024 | -5.41968 | 0.00217  | 0.097376 | -0.88626 |
| MSTRG.45998.1     | 1.12534  | 1.639803 | 5.418884 | 0.002172 | 0.097376 | -0.88697 |
| lnc-CDK5R1-3:1    | -1.42156 | 2.117874 | -5.41411 | 0.002181 | 0.097613 | -0.89124 |
| ENST00000445589.1 | 2.064268 | 5.2751   | 5.412864 | 0.002183 | 0.097676 | -0.89235 |
| lnc-TP53BP2-5:1   | -1.35021 | 7.163099 | -5.41123 | 0.002187 | 0.097772 | -0.89382 |
| ENST00000653622.1 | 1.825494 | 2.300635 | 5.408429 | 0.002192 | 0.09787  | -0.89632 |
| lnc-RHBDD3-3:3    | 1.096445 | 3.155992 | 5.403795 | 0.002201 | 0.098149 | -0.90047 |
| lnc-ENDOD1-6:1    | -1.75441 | 2.628096 | -5.39956 | 0.002209 | 0.098274 | -0.90427 |
| ENST00000457890.1 | 1.714756 | 2.27112  | 5.394867 | 0.002218 | 0.098402 | -0.90848 |
| lnc-AKR1D1-5:2    | 1.171868 | 1.669292 | 5.394046 | 0.00222  | 0.098402 | -0.90922 |
| NONHSAT167589.1   | 1.478418 | 2.000387 | 5.393747 | 0.00222  | 0.098402 | -0.90949 |
| lnc-MRPL44-5:1    | -1.80708 | 5.544352 | -5.39261 | 0.002223 | 0.098402 | -0.91051 |
| MSTRG.33210.1     | 1.725183 | 2.268973 | 5.392576 | 0.002223 | 0.098402 | -0.91054 |
| MSTRG.7233.1      | -1.28571 | 2.710019 | -5.3918  | 0.002224 | 0.098402 | -0.91123 |
| lnc-JAG1-3:3      | 1.617906 | 1.855782 | 5.389564 | 0.002228 | 0.098428 | -0.91324 |
| lnc-USP6NL-7:12   | 1.034016 | 6.288398 | 5.386106 | 0.002235 | 0.098503 | -0.91635 |
| NONHSAT187637.1   | 2.308022 | 4.285567 | 5.385292 | 0.002237 | 0.098503 | -0.91708 |
| lnc-FZD7-1:1      | 1.115032 | 4.459599 | 5.383568 | 0.00224  | 0.098503 | -0.91863 |
| lnc-AAGAB-3:4     | -1.6623  | 2.460448 | -5.38343 | 0.002241 | 0.098503 | -0.91875 |
| lnc-TRMT61B-7:2   | 1.393078 | 3.786248 | 5.381673 | 0.002244 | 0.098503 | -0.92033 |
| lnc-PATE4-3:1     | -1.67982 | 3.239178 | -5.37834 | 0.002251 | 0.098503 | -0.92333 |
| ENST00000645656.1 | 1.702208 | 2.080986 | 5.378212 | 0.002251 | 0.098503 | -0.92345 |
| ZNF582-AS1:39     | 1.29152  | 1.999087 | 5.373174 | 0.002261 | 0.098693 | -0.92798 |
| NONHSAT202366.1   | -2.03995 | 2.257488 | -5.37287 | 0.002261 | 0.098693 | -0.92826 |
| lnc-ZC3H15-4:1    | 1.120726 | 2.280638 | 5.368452 | 0.00227  | 0.098964 | -0.93224 |
| lnc-PTPN2-10:1    | 2.496604 | 2.833197 | 5.364529 | 0.002278 | 0.099107 | -0.93577 |
| MSTRG.29606.1     | -1.1764  | 1.952717 | -5.36115 | 0.002285 | 0.099241 | -0.93882 |
| NONHSAT206254.1   | 1.358274 | 3.3804   | 5.357729 | 0.002292 | 0.099341 | -0.94191 |
| lnc-BST2-1:1      | -1.61091 | 6.50252  | -5.35403 | 0.002299 | 0.099426 | -0.94525 |
| lnc-CAPRIN2-2:8   | -1.11651 | 2.414466 | -5.3534  | 0.0023   | 0.099426 | -0.94582 |
| NONHSAT205448.1   | 1.62834  | 2.280282 | 5.350971 | 0.002305 | 0.09945  | -0.94802 |
| lnc-TANC1-6:2     | -1.3055  | 1.93005  | -5.34988 | 0.002308 | 0.09945  | -0.949   |
| MSTRG.32658.1     | 1.329731 | 1.723176 | 5.347119 | 0.002313 | 0.099459 | -0.9515  |
| ENST00000611741.1 | -1.52211 | 2.66977  | -5.34047 | 0.002327 | 0.099607 | -0.95751 |
| NONHSAT186381.1   | -1.1522  | 6.260011 | -5.33673 | 0.002335 | 0.099829 | -0.9609  |
| ENST00000527443.1 | 1.031047 | 2.852988 | 5.333635 | 0.002341 | 0.099997 | -0.96371 |
| ENST00000512730.1 | 1.25251  | 1.688965 | 5.333393 | 0.002341 | 0.099997 | -0.96392 |
| lnc-ERP29-2:1     | -1.07924 | 5.296946 | -5.33131 | 0.002346 | 0.100092 | -0.96581 |
| NONHSAT213288.1   | -1.68822 | 2.82462  | -5.33088 | 0.002347 | 0.100092 | -0.9662  |

|                   |          |          |          |          |          |          |
|-------------------|----------|----------|----------|----------|----------|----------|
| T279189           | 1.032437 | 1.616723 | 5.329555 | 0.002349 | 0.100104 | -0.96741 |
| MSTRG.58940.1     | -1.85264 | 2.896028 | -5.32709 | 0.002355 | 0.100224 | -0.96964 |
| lnc-ECHDC3-2:2    | 1.012087 | 5.382458 | 5.321896 | 0.002365 | 0.100312 | -0.97436 |
| lnc-OR11A1-1:1    | -1.10597 | 3.263607 | -5.32161 | 0.002366 | 0.100312 | -0.97462 |
| NONHSAT170971.1   | -1.0888  | 1.643176 | -5.31792 | 0.002374 | 0.100312 | -0.97797 |
| NONHSAT201110.1   | 1.242175 | 3.95625  | 5.31738  | 0.002375 | 0.100312 | -0.97846 |
| lnc-SEPSECS-4:2   | -1.3624  | 5.165703 | -5.31683 | 0.002376 | 0.100312 | -0.97896 |
| lnc-CD177-1:2     | -1.23503 | 2.270821 | -5.31385 | 0.002382 | 0.100423 | -0.98167 |
| ENST00000655326.1 | 1.358168 | 1.947457 | 5.309396 | 0.002392 | 0.100457 | -0.98572 |
| NONHSAT170875.1   | -1.92082 | 2.517415 | -5.30635 | 0.002398 | 0.100457 | -0.98849 |
| NR_120606         | -1.11869 | 1.978012 | -5.30619 | 0.002399 | 0.100457 | -0.98864 |
| NONHSAT174502.1   | -1.33489 | 3.24009  | -5.30509 | 0.002401 | 0.100457 | -0.98964 |
| NR_110944         | 1.097211 | 3.323838 | 5.304782 | 0.002402 | 0.100457 | -0.98992 |
| NONHSAT191219.1   | 1.270867 | 4.890177 | 5.304083 | 0.002403 | 0.100457 | -0.99055 |
| NONHSAT175877.1   | -1.23903 | 2.355854 | -5.30372 | 0.002404 | 0.100457 | -0.99088 |
| lnc-SETX-2:1      | 1.220884 | 1.962709 | 5.303005 | 0.002405 | 0.100457 | -0.99154 |
| NONHSAT169483.1   | -1.18196 | 4.543063 | -5.30291 | 0.002406 | 0.100457 | -0.99163 |
| NONHSAT193414.1   | 1.268898 | 1.975327 | 5.301934 | 0.002408 | 0.100457 | -0.99251 |
| NONHSAT197428.1   | 1.887645 | 2.579136 | 5.298952 | 0.002414 | 0.100457 | -0.99523 |
| lnc-CHST8-5:3     | -1.1762  | 7.775483 | -5.29841 | 0.002415 | 0.100457 | -0.99573 |
| NONHSAT197463.1   | -1.17756 | 2.53075  | -5.29804 | 0.002416 | 0.100457 | -0.99606 |
| lnc-HSPB9-1:1     | -1.165   | 1.89664  | -5.29726 | 0.002418 | 0.100457 | -0.99677 |
| MSTRG.28141.1     | 1.0278   | 4.020468 | 5.295885 | 0.002421 | 0.100457 | -0.99803 |
| NONHSAT167997.1   | 2.475354 | 2.619418 | 5.294679 | 0.002423 | 0.100457 | -0.99913 |
| MSTRG.40495.1     | 1.731368 | 2.078363 | 5.294315 | 0.002424 | 0.100457 | -0.99946 |
| lnc-MDH1-2:1      | -1.19487 | 6.597455 | -5.29307 | 0.002427 | 0.100486 | -1.00059 |
| T313558           | 2.797876 | 2.946431 | 5.292393 | 0.002428 | 0.100493 | -1.00121 |
| NONHSAT177925.1   | 1.05749  | 2.353765 | 5.289953 | 0.002433 | 0.100587 | -1.00344 |
| ENST00000659499.1 | -1.98523 | 2.539562 | -5.28733 | 0.002439 | 0.100597 | -1.00583 |
| lnc-CA6-5:1       | -1.45075 | 5.334817 | -5.2869  | 0.00244  | 0.100597 | -1.00622 |
| MSTRG.59388.1     | -1.62832 | 2.184154 | -5.28321 | 0.002448 | 0.100722 | -1.0096  |
| NONHSAT205898.1   | 1.397433 | 2.027909 | 5.279536 | 0.002456 | 0.100876 | -1.01295 |
| lnc-ZNF286A-2:1   | -1.57807 | 6.376017 | -5.27641 | 0.002463 | 0.101032 | -1.01581 |
| lnc-SZRD1-5:2     | 1.279616 | 3.577579 | 5.274984 | 0.002466 | 0.101078 | -1.01712 |
| ENST00000509194.1 | 1.218618 | 5.876646 | 5.273296 | 0.00247  | 0.101189 | -1.01866 |
| lnc-SMKR1-2:2     | -1.2892  | 10.83093 | -5.27126 | 0.002474 | 0.101279 | -1.02053 |
| MSTRG.25480.3     | -1.03252 | 8.152747 | -5.27107 | 0.002475 | 0.101279 | -1.0207  |
| ENST00000616774.1 | 1.070603 | 4.848866 | 5.270545 | 0.002476 | 0.101279 | -1.02118 |
| lnc-ACMSD-3:1     | -1.30851 | 1.827277 | -5.26907 | 0.002479 | 0.101301 | -1.02253 |
| lnc-SLC17A5-2:1   | -1.20503 | 4.561686 | -5.26889 | 0.002479 | 0.101301 | -1.0227  |
| lnc-IFT74-5:1     | -1.02357 | 12.01963 | -5.26644 | 0.002485 | 0.101439 | -1.02494 |
| ENST00000567624.1 | -1.55545 | 2.780899 | -5.26076 | 0.002498 | 0.101789 | -1.03015 |
| T273562           | -1.18008 | 3.514714 | -5.25823 | 0.002503 | 0.101836 | -1.03247 |
| NONHSAT197159.1   | -1.59534 | 5.314224 | -5.25779 | 0.002504 | 0.101836 | -1.03287 |
| lnc-ARPC1A-7:3    | 1.093313 | 1.654654 | 5.257728 | 0.002504 | 0.101836 | -1.03293 |
| lnc-SLC2A9-7:1    | -1.02477 | 6.457562 | -5.25762 | 0.002505 | 0.101836 | -1.03303 |
| ENST00000598561.1 | 2.180246 | 2.925413 | 5.257535 | 0.002505 | 0.101836 | -1.03311 |
| lnc-ZNF219-1:1    | 2.02304  | 2.430803 | 5.255939 | 0.002508 | 0.101899 | -1.03457 |

|                     |          |          |          |          |          |          |
|---------------------|----------|----------|----------|----------|----------|----------|
| lnc-MGAT4C-1:4      | -1.24609 | 6.135576 | -5.25417 | 0.002512 | 0.101978 | -1.03619 |
| T267303             | 1.210564 | 4.329407 | 5.249734 | 0.002522 | 0.102136 | -1.04027 |
| lnc-CYYR1-1:2       | -1.3114  | 5.673273 | -5.24882 | 0.002524 | 0.102178 | -1.04111 |
| NR_027003           | 1.814207 | 2.312825 | 5.246205 | 0.00253  | 0.102198 | -1.04351 |
| lnc-RBMS1-9:1       | 1.009244 | 1.728351 | 5.244021 | 0.002535 | 0.102198 | -1.04552 |
| NONHSAT154155.1     | 1.613236 | 2.385142 | 5.242546 | 0.002538 | 0.10222  | -1.04688 |
| NONHSAT224156.1     | 1.041646 | 5.080318 | 5.23976  | 0.002545 | 0.102394 | -1.04944 |
| ENST00000456771.1   | -1.70823 | 2.656594 | -5.23273 | 0.002561 | 0.102743 | -1.05591 |
| lnc-EYA4-3:1        | -1.13912 | 8.342967 | -5.23216 | 0.002562 | 0.102743 | -1.05644 |
| lnc-ATP10B-2:1      | -1.13394 | 2.989985 | -5.22768 | 0.002573 | 0.102835 | -1.06056 |
| ENST00000655097.1   | 1.577292 | 1.895972 | 5.226969 | 0.002574 | 0.102835 | -1.06122 |
| lnc-HNRNPA1P48-15:1 | -1.01908 | 2.264028 | -5.22434 | 0.00258  | 0.102868 | -1.06365 |
| ENST00000538041.1   | 2.021763 | 2.183863 | 5.223293 | 0.002583 | 0.102868 | -1.06461 |
| MSTRG.6432.1        | 1.526168 | 1.84007  | 5.222819 | 0.002584 | 0.102868 | -1.06505 |
| lnc-SPATA19-9:3     | 1.451327 | 2.071006 | 5.221254 | 0.002587 | 0.102868 | -1.0665  |
| NONHSAT160364.1     | -1.1106  | 3.76047  | -5.21868 | 0.002593 | 0.102868 | -1.06888 |
| lnc-PAQR9-5:1       | 2.225129 | 2.245757 | 5.20662  | 0.002622 | 0.103623 | -1.08002 |
| lnc-LYPD6-10:1      | -1.60013 | 9.808474 | -5.2036  | 0.002629 | 0.103824 | -1.08282 |
| NR_033840           | 1.185692 | 3.602611 | 5.202757 | 0.002631 | 0.103861 | -1.08359 |
| NONHSAT180357.1     | 1.218786 | 2.683521 | 5.200526 | 0.002636 | 0.103989 | -1.08566 |
| NONHSAT154619.1     | -1.35865 | 3.946813 | -5.19833 | 0.002641 | 0.104154 | -1.08769 |
| NONHSAT205068.1     | 1.694155 | 2.70686  | 5.196204 | 0.002646 | 0.104274 | -1.08966 |
| NONHSAT209092.1     | -1.13784 | 7.388634 | -5.19582 | 0.002647 | 0.104274 | -1.09002 |
| lnc-FXYD4-8:2       | 1.316357 | 1.753789 | 5.191098 | 0.002659 | 0.104426 | -1.0944  |
| ENST00000648514.1   | -1.6553  | 2.66041  | -5.1903  | 0.00266  | 0.10443  | -1.09514 |
| lnc-OLFM4-4:4       | -1.30319 | 3.291599 | -5.18598 | 0.002671 | 0.104664 | -1.09914 |
| ENST00000455257.2   | 1.133018 | 3.803108 | 5.184215 | 0.002675 | 0.104772 | -1.10078 |
| NONHSAT201480.1     | -1.64743 | 2.645362 | -5.18391 | 0.002676 | 0.104772 | -1.10107 |
| lnc-KLHL42-4:1      | -1.21656 | 5.853425 | -5.18312 | 0.002678 | 0.104772 | -1.1018  |
| NONHSAT201901.1     | 1.139213 | 5.064228 | 5.182633 | 0.002679 | 0.104777 | -1.10225 |
| NONHSAT224090.1     | 1.733501 | 3.489873 | 5.180665 | 0.002684 | 0.104801 | -1.10408 |
| NONHSAT164680.1     | 1.266134 | 2.675699 | 5.176577 | 0.002694 | 0.104985 | -1.10788 |
| lnc-CDK19-5:1       | -1.77144 | 2.350983 | -5.17402 | 0.0027   | 0.105105 | -1.11025 |
| NONHSAT212318.1     | -1.23273 | 1.989927 | -5.17123 | 0.002707 | 0.105192 | -1.11285 |
| lnc-FGD2-2:1        | -1.02891 | 4.821834 | -5.17074 | 0.002708 | 0.105192 | -1.11331 |
| NONHSAT170362.1     | 1.257249 | 1.648348 | 5.166967 | 0.002717 | 0.105299 | -1.11682 |
| T113219             | 1.379944 | 3.553191 | 5.166609 | 0.002718 | 0.105299 | -1.11716 |
| MSTRG.56903.1       | -1.45518 | 3.060525 | -5.16645 | 0.002718 | 0.105299 | -1.11731 |
| MSTRG.10019.1       | 1.771577 | 2.690774 | 5.164494 | 0.002723 | 0.10542  | -1.11913 |
| lnc-CYTH4-2:1       | 1.310626 | 2.07564  | 5.158477 | 0.002738 | 0.105747 | -1.12473 |
| NONHSAT224461.1     | -1.33537 | 1.784378 | -5.15645 | 0.002743 | 0.105814 | -1.12662 |
| lnc-C5orf30-7:1     | 1.188377 | 3.364295 | 5.155876 | 0.002744 | 0.105814 | -1.12716 |
| LINC02542:7         | -1.52753 | 2.874869 | -5.15095 | 0.002757 | 0.106004 | -1.13176 |
| ENST00000531379.1   | -1.59515 | 2.178789 | -5.14686 | 0.002767 | 0.106123 | -1.13558 |
| MSTRG.71225.1       | -1.48817 | 2.451862 | -5.14017 | 0.002784 | 0.106409 | -1.14183 |
| lnc-TMC6-11:1       | 1.374701 | 2.190846 | 5.140122 | 0.002784 | 0.106409 | -1.14187 |
| NONHSAT154364.1     | 1.248189 | 2.937298 | 5.133306 | 0.002801 | 0.106603 | -1.14825 |
| lnc-COMTD1-1:1      | -1.76218 | 2.956315 | -5.13282 | 0.002802 | 0.106603 | -1.14871 |

|                   |          |          |          |          |          |          |
|-------------------|----------|----------|----------|----------|----------|----------|
| NONHSAT188097.1   | 1.559118 | 3.246964 | 5.132287 | 0.002804 | 0.106603 | -1.1492  |
| MSTRG.52490.1     | -1.51835 | 6.194658 | -5.1308  | 0.002808 | 0.106627 | -1.1506  |
| NONHSAT222138.1   | -1.39911 | 2.155213 | -5.12846 | 0.002814 | 0.106726 | -1.15279 |
| NONHSAT157805.1   | 1.166205 | 1.602809 | 5.127953 | 0.002815 | 0.106726 | -1.15326 |
| lnc-AMELY-24:1    | 1.30634  | 4.23588  | 5.124697 | 0.002823 | 0.106726 | -1.15632 |
| lnc-PLCB1-2:1     | -1.17657 | 2.486736 | -5.12441 | 0.002824 | 0.106726 | -1.15659 |
| NONHSAT205701.1   | -1.3906  | 2.011577 | -5.12297 | 0.002828 | 0.106746 | -1.15793 |
| NONHSAT202035.1   | -1.54886 | 8.090324 | -5.12096 | 0.002833 | 0.10678  | -1.15982 |
| ENST00000534076.2 | 1.934648 | 2.083823 | 5.116162 | 0.002845 | 0.106971 | -1.16432 |
| NONHSAT193183.1   | -1.26911 | 5.207187 | -5.11613 | 0.002845 | 0.106971 | -1.16435 |
| NONHSAT199698.1   | -1.97405 | 3.719306 | -5.11548 | 0.002847 | 0.106977 | -1.16496 |
| NONHSAT220584.1   | -1.28257 | 1.727119 | -5.11371 | 0.002852 | 0.107008 | -1.16663 |
| ENST00000587412.1 | 1.099462 | 5.6722   | 5.111391 | 0.002858 | 0.10716  | -1.1688  |
| NONHSAT211118.1   | 1.400763 | 1.944291 | 5.110924 | 0.002859 | 0.10716  | -1.16924 |
| MSTRG.18758.1     | -1.241   | 1.930469 | -5.10985 | 0.002862 | 0.107226 | -1.17026 |
| NONHSAT164705.1   | 2.072213 | 2.055787 | 5.108671 | 0.002865 | 0.107254 | -1.17136 |
| lnc-SEC24C-7:1    | -1.0668  | 3.896549 | -5.10728 | 0.002868 | 0.107317 | -1.17267 |
| NONHSAT200121.1   | 1.321392 | 2.914023 | 5.105137 | 0.002874 | 0.107447 | -1.17468 |
| NONHSAT212525.1   | 1.457433 | 2.172612 | 5.104171 | 0.002877 | 0.107502 | -1.17559 |
| NONHSAT197711.1   | -1.43011 | 2.693798 | -5.10181 | 0.002883 | 0.107534 | -1.17781 |
| NONHSAT189659.1   | 1.030906 | 4.054568 | 5.097131 | 0.002895 | 0.107796 | -1.18222 |
| lnc-CCDC190-1:2   | 1.349569 | 2.854745 | 5.096883 | 0.002896 | 0.107796 | -1.18245 |
| MSTRG.40703.1     | 1.516086 | 2.107404 | 5.095907 | 0.002898 | 0.107836 | -1.18337 |
| MSTRG.62694.1     | 1.502196 | 3.092956 | 5.094765 | 0.002901 | 0.107869 | -1.18444 |
| lnc-BTBD18-1:1    | -1.04334 | 6.970771 | -5.09385 | 0.002904 | 0.107883 | -1.1853  |
| NONHSAT214360.1   | -1.06771 | 1.862173 | -5.09265 | 0.002907 | 0.107924 | -1.18644 |
| MSTRG.7129.1      | 1.434153 | 1.761176 | 5.092599 | 0.002907 | 0.107924 | -1.18649 |
| NONHSAT157973.1   | 1.86139  | 3.669581 | 5.09176  | 0.002909 | 0.107937 | -1.18728 |
| NONHSAT184723.1   | 1.139661 | 2.679126 | 5.089971 | 0.002914 | 0.107945 | -1.18896 |
| lnc-C11orf54-3:1  | -1.0577  | 4.063986 | -5.08932 | 0.002916 | 0.107969 | -1.18957 |
| lnc-CDH6-137:1    | 1.020684 | 4.579593 | 5.08813  | 0.002919 | 0.107991 | -1.1907  |
| T152287           | -1.13105 | 5.084232 | -5.08582 | 0.002925 | 0.108112 | -1.19288 |
| NONHSAT163317.1   | -1.11642 | 9.413419 | -5.08546 | 0.002926 | 0.108112 | -1.19322 |
| NONHSAT200951.1   | -1.17863 | 8.654492 | -5.08462 | 0.002928 | 0.108155 | -1.19401 |
| NONHSAT178775.1   | 1.127252 | 1.845415 | 5.083076 | 0.002932 | 0.108159 | -1.19547 |
| ENST00000431019.1 | -1.4657  | 2.517366 | -5.08204 | 0.002935 | 0.108174 | -1.19644 |
| MSTRG.45502.1     | -1.68529 | 1.976819 | -5.0804  | 0.00294  | 0.108174 | -1.198   |
| NONHSAT218810.1   | 1.056344 | 1.631946 | 5.07957  | 0.002942 | 0.108174 | -1.19878 |
| NONHSAT214741.1   | -1.2087  | 1.904357 | -5.07887 | 0.002944 | 0.108174 | -1.19943 |
| lnc-AHSP-5:1      | -1.02221 | 7.662781 | -5.07839 | 0.002945 | 0.108174 | -1.19989 |
| lnc-MTNR1B-3:1    | 1.31899  | 2.847579 | 5.078323 | 0.002945 | 0.108174 | -1.19995 |
| NONHSAT189657.1   | 1.11028  | 3.060801 | 5.077925 | 0.002946 | 0.108174 | -1.20033 |
| ENST00000642235.1 | 1.153201 | 1.849066 | 5.076744 | 0.00295  | 0.108185 | -1.20145 |
| lnc-NFASC-1:1     | 1.12936  | 5.021401 | 5.07495  | 0.002954 | 0.10828  | -1.20314 |
| T011580           | -1.54952 | 3.183216 | -5.07459 | 0.002955 | 0.10828  | -1.20348 |
| lnc-SAXO1-1:1     | -1.10682 | 4.346815 | -5.07277 | 0.00296  | 0.10828  | -1.2052  |
| NONHSAT210563.1   | 1.20998  | 4.200681 | 5.070133 | 0.002967 | 0.108408 | -1.20769 |
| lnc-EZR-2:1       | 1.717592 | 1.944243 | 5.059252 | 0.002997 | 0.109157 | -1.21799 |

|                   |          |          |          |          |          |          |
|-------------------|----------|----------|----------|----------|----------|----------|
| NONHSAT154683.1   | -1.18603 | 3.540273 | -5.05251 | 0.003016 | 0.10939  | -1.22439 |
| lnc-ETFBKMT-2:1   | -1.15916 | 6.760664 | -5.05242 | 0.003016 | 0.10939  | -1.22447 |
| NR_038292         | 2.183107 | 3.385862 | 5.050712 | 0.003021 | 0.109414 | -1.22609 |
| lnc-ELOA-2:2      | 1.221652 | 5.236538 | 5.049293 | 0.003025 | 0.109431 | -1.22744 |
| NONHSAT173654.1   | -1.07699 | 8.201881 | -5.04654 | 0.003032 | 0.109507 | -1.23005 |
| ENST00000657275.1 | -1.22722 | 1.741152 | -5.04427 | 0.003039 | 0.109558 | -1.23221 |
| lnc-TGIF1-12:2    | -1.26641 | 3.847936 | -5.04378 | 0.00304  | 0.109558 | -1.23267 |
| ENST00000412298.5 | -1.23476 | 5.889262 | -5.04368 | 0.00304  | 0.109558 | -1.23276 |
| NR_110248         | 1.077717 | 1.925962 | 5.034291 | 0.003067 | 0.110004 | -1.24169 |
| lnc-ZNF706-9:1    | -1.61327 | 2.934637 | -5.0326  | 0.003072 | 0.110051 | -1.2433  |
| ENST00000618027.1 | 1.085674 | 4.839773 | 5.032533 | 0.003072 | 0.110051 | -1.24336 |
| ENST00000561816.1 | -2.18421 | 3.031142 | -5.0319  | 0.003073 | 0.110051 | -1.24396 |
| ENST00000441613.1 | -1.29201 | 1.89639  | -5.03088 | 0.003076 | 0.110076 | -1.24493 |
| lnc-NPY5R-5:1     | -1.158   | 9.081305 | -5.0242  | 0.003095 | 0.110382 | -1.2513  |
| lnc-CCT6B-6:2     | 1.515768 | 1.870484 | 5.024052 | 0.003096 | 0.110382 | -1.25144 |
| lnc-TLE3-15:3     | -1.38572 | 1.86154  | -5.02267 | 0.0031   | 0.110481 | -1.25275 |
| NONHSAT153844.1   | 1.268399 | 2.166658 | 5.021907 | 0.003102 | 0.11052  | -1.25348 |
| MSTRG.22526.3     | -1.01134 | 2.20192  | -5.02104 | 0.003104 | 0.11053  | -1.25431 |
| lnc-EGFL6-8:4     | 1.321502 | 4.32008  | 5.019031 | 0.00311  | 0.110581 | -1.25623 |
| T318529           | -1.53209 | 2.619754 | -5.01812 | 0.003113 | 0.110581 | -1.25709 |
| MSTRG.18563.1     | 1.662814 | 1.995542 | 5.016686 | 0.003117 | 0.110581 | -1.25846 |
| NONHSAT170160.1   | -1.68053 | 2.822815 | -5.01473 | 0.003123 | 0.110636 | -1.26033 |
| lnc-CISH-4:1      | -2.08638 | 6.189131 | -5.01349 | 0.003126 | 0.110643 | -1.26151 |
| NONHSAT193289.1   | -1.36499 | 2.346088 | -5.01311 | 0.003127 | 0.110643 | -1.26188 |
| lnc-SH3BP4-8:1    | 1.303562 | 2.0081   | 5.012218 | 0.00313  | 0.110653 | -1.26273 |
| ENST00000521188.1 | 1.29212  | 1.757755 | 5.011639 | 0.003131 | 0.110657 | -1.26328 |
| NONHSAT218166.1   | 1.394739 | 1.738403 | 5.01067  | 0.003134 | 0.110695 | -1.2642  |
| lnc-LAMA1-7:1     | 1.498867 | 1.949905 | 5.007333 | 0.003144 | 0.110765 | -1.26739 |
| NONHSAT182696.1   | 1.812044 | 2.012525 | 5.006912 | 0.003145 | 0.110767 | -1.26779 |
| T129768           | 1.201768 | 4.207314 | 5.004775 | 0.003151 | 0.110872 | -1.26984 |
| NONHSAT187701.1   | 1.014969 | 1.705887 | 5.004199 | 0.003153 | 0.110892 | -1.27039 |
| NONHSAT172134.1   | 1.506583 | 2.170083 | 5.002849 | 0.003157 | 0.110954 | -1.27168 |
| MSTRG.45333.1     | -1.60232 | 4.295824 | -5.00196 | 0.00316  | 0.110968 | -1.27253 |
| lnc-ZIC1-21:1     | 1.671221 | 4.58213  | 4.998952 | 0.003168 | 0.111177 | -1.2754  |
| NONHSAT191848.1   | 1.098591 | 3.932836 | 4.996163 | 0.003177 | 0.111254 | -1.27807 |
| ENST00000510433.1 | 1.259079 | 1.677816 | 4.995221 | 0.003179 | 0.111313 | -1.27898 |
| NONHSAT218126.1   | 2.041409 | 2.423294 | 4.992543 | 0.003187 | 0.111439 | -1.28154 |
| MSTRG.64707.2     | 2.020527 | 2.435855 | 4.990975 | 0.003192 | 0.111439 | -1.28304 |
| MSTRG.8348.1      | 1.216597 | 1.708025 | 4.990079 | 0.003195 | 0.111439 | -1.2839  |
| T165321           | -1.60472 | 2.55355  | -4.98984 | 0.003195 | 0.111439 | -1.28413 |
| lnc-PIGC-5:1      | 1.319709 | 2.200109 | 4.989821 | 0.003195 | 0.111439 | -1.28415 |
| NONHSAT211686.1   | -1.40686 | 4.277808 | -4.98695 | 0.003204 | 0.111439 | -1.2869  |
| lnc-AMIGO2-8:2    | -1.12609 | 10.91368 | -4.98539 | 0.003208 | 0.111439 | -1.2884  |
| NONHSAT170464.1   | 2.086096 | 2.400768 | 4.984368 | 0.003212 | 0.111439 | -1.28937 |
| lnc-TMEM250-3:2   | 1.674626 | 2.286447 | 4.982163 | 0.003218 | 0.111439 | -1.29149 |
| ENST00000548010.1 | -1.32272 | 1.916612 | -4.98171 | 0.003219 | 0.111439 | -1.29193 |
| NONHSAT187289.1   | -1.23122 | 2.918398 | -4.9817  | 0.003219 | 0.111439 | -1.29193 |
| MSTRG.27104.1     | -1.47822 | 2.537311 | -4.97832 | 0.00323  | 0.111583 | -1.29518 |

|                     |          |          |          |          |          |          |
|---------------------|----------|----------|----------|----------|----------|----------|
| lnc-GPR39-2:6       | 1.124984 | 3.190547 | 4.978066 | 0.00323  | 0.111583 | -1.29542 |
| ENST00000662052.1   | -1.0535  | 3.735677 | -4.9747  | 0.00324  | 0.111583 | -1.29866 |
| lnc-NTRK2-1:1       | -2.30855 | 3.65008  | -4.97458 | 0.003241 | 0.111583 | -1.29877 |
| lnc-DDX58-3:1       | -1.38783 | 3.023775 | -4.97421 | 0.003242 | 0.111583 | -1.29912 |
| NONHSAT222229.1     | 1.070831 | 4.550694 | 4.971662 | 0.00325  | 0.111583 | -1.30157 |
| MSTRG.795.1         | 1.684245 | 1.869407 | 4.970596 | 0.003253 | 0.111609 | -1.30259 |
| lnc-SLC19A3-2:1     | -1.03125 | 6.481438 | -4.96683 | 0.003264 | 0.111644 | -1.30622 |
| lnc-ATAD2-2:1       | 2.128675 | 3.936035 | 4.963374 | 0.003275 | 0.111644 | -1.30954 |
| NONHSAT158127.1     | 1.020792 | 4.797856 | 4.963128 | 0.003275 | 0.111644 | -1.30978 |
| NONHSAT164501.1     | -1.01874 | 9.119863 | -4.9609  | 0.003282 | 0.111644 | -1.31192 |
| ENST00000454622.2   | 1.256983 | 4.882323 | 4.960554 | 0.003283 | 0.111644 | -1.31225 |
| NONHSAT160858.1     | 1.144948 | 1.656745 | 4.960149 | 0.003285 | 0.111644 | -1.31264 |
| NONHSAT168816.1     | -1.64486 | 2.491837 | -4.9601  | 0.003285 | 0.111644 | -1.31269 |
| lnc-SPTSSB-4:1      | -1.59318 | 3.022456 | -4.9595  | 0.003287 | 0.111644 | -1.31327 |
| lnc-KIDINS220-20:1  | 1.066154 | 1.618762 | 4.958787 | 0.003289 | 0.111644 | -1.31396 |
| NONHSAT186349.1     | 2.010148 | 2.555728 | 4.958726 | 0.003289 | 0.111644 | -1.31401 |
| T302913             | 1.154427 | 1.80669  | 4.958384 | 0.00329  | 0.111644 | -1.31434 |
| lnc-FGF9-15:2       | 1.053605 | 2.913309 | 4.957414 | 0.003293 | 0.111644 | -1.31528 |
| NR_027420           | -1.35857 | 4.550863 | -4.95629 | 0.003296 | 0.111644 | -1.31636 |
| MSTRG.70000.1       | 1.406327 | 4.926672 | 4.955258 | 0.0033   | 0.111644 | -1.31735 |
| ENST00000657876.1   | -1.17208 | 3.653191 | -4.95165 | 0.003311 | 0.111816 | -1.32083 |
| lnc-SSX5-4:1        | -1.94585 | 2.688859 | -4.95144 | 0.003311 | 0.111816 | -1.32103 |
| lnc-MROH2B-2:1      | -1.04776 | 10.29122 | -4.94385 | 0.003335 | 0.112224 | -1.32836 |
| MSTRG.35265.1       | 1.982344 | 2.252011 | 4.94359  | 0.003336 | 0.112224 | -1.32861 |
| MSTRG.35113.1       | 1.495613 | 3.581254 | 4.94294  | 0.003338 | 0.112254 | -1.32923 |
| NONHSAT184293.1     | 2.834646 | 3.777321 | 4.940739 | 0.003345 | 0.11241  | -1.33136 |
| lnc-UCHL5-7:1       | -1.07741 | 3.819402 | -4.93358 | 0.003367 | 0.11277  | -1.33828 |
| lnc-PERP-1:4        | -1.52975 | 2.814739 | -4.93119 | 0.003374 | 0.11277  | -1.34059 |
| NONHSAT167812.1     | -1.1701  | 1.926245 | -4.93091 | 0.003375 | 0.11277  | -1.34086 |
| NONHSAT176082.1     | -2.05453 | 2.60419  | -4.92813 | 0.003384 | 0.112899 | -1.34355 |
| lnc-BLID-6:1        | -1.51591 | 2.66805  | -4.92737 | 0.003387 | 0.112899 | -1.34428 |
| lnc-PKD2L1-1:3      | 1.224698 | 4.417572 | 4.926537 | 0.003389 | 0.112899 | -1.34509 |
| ENST00000670949.1   | 1.653211 | 2.40516  | 4.926468 | 0.003389 | 0.112899 | -1.34516 |
| NONHSAT177137.1     | -1.12632 | 2.669573 | -4.92318 | 0.0034   | 0.113127 | -1.34834 |
| ENST00000587527.1   | -1.22649 | 4.649248 | -4.92068 | 0.003408 | 0.113215 | -1.35076 |
| lnc-CEP128-7:1      | -1.45666 | 1.931453 | -4.91895 | 0.003413 | 0.113354 | -1.35244 |
| MSTRG.1888.1        | 1.466947 | 1.880207 | 4.918354 | 0.003415 | 0.113354 | -1.35302 |
| lnc-HRASLS2-1:1     | -1.7101  | 2.143685 | -4.918   | 0.003416 | 0.113354 | -1.35336 |
| ENST00000611513.1   | 1.17675  | 5.491184 | 4.917966 | 0.003416 | 0.113354 | -1.35339 |
| lnc-EPPIN-WFDC6-1:1 | -1.0644  | 1.900706 | -4.91703 | 0.003419 | 0.113363 | -1.3543  |
| lnc-MAP3K8-16:1     | 1.076182 | 3.031452 | 4.91506  | 0.003426 | 0.113364 | -1.35621 |
| ENST00000663471.1   | -1.22806 | 3.048605 | -4.91224 | 0.003435 | 0.113549 | -1.35894 |
| lnc-MET-1:1         | -1.83491 | 2.669663 | -4.91111 | 0.003438 | 0.113549 | -1.36004 |
| lnc-CYP7B1-3:1      | 1.258247 | 1.977819 | 4.907448 | 0.00345  | 0.113659 | -1.36359 |
| lnc-VIRMA-1:3       | 1.000269 | 1.597093 | 4.907283 | 0.003451 | 0.113659 | -1.36375 |
| lnc-LARPI-3:1       | -1.04778 | 8.72461  | -4.90675 | 0.003453 | 0.113659 | -1.36427 |
| lnc-NUDCD2-12:1     | 1.463754 | 3.633378 | 4.906701 | 0.003453 | 0.113659 | -1.36432 |
| lnc-TPGS2-2:1       | 1.112237 | 3.707413 | 4.904625 | 0.003459 | 0.113744 | -1.36634 |

|                   |          |          |          |          |          |          |
|-------------------|----------|----------|----------|----------|----------|----------|
| ENST00000511875.1 | 1.451117 | 1.810954 | 4.903872 | 0.003462 | 0.113744 | -1.36707 |
| ENST00000659521.1 | -1.07459 | 6.737657 | -4.90337 | 0.003463 | 0.113744 | -1.36755 |
| ENST00000508179.1 | 1.139641 | 5.781679 | 4.90288  | 0.003465 | 0.113744 | -1.36803 |
| lnc-ZBBX-3:1      | 1.586683 | 1.829633 | 4.901641 | 0.003469 | 0.113744 | -1.36924 |
| T377599           | 1.241302 | 1.992271 | 4.90127  | 0.00347  | 0.113744 | -1.3696  |
| NONHSAT198699.1   | -1.07139 | 7.204145 | -4.9008  | 0.003472 | 0.113744 | -1.37005 |
| NONHSAT198425.1   | 1.247512 | 5.38697  | 4.900026 | 0.003474 | 0.113744 | -1.37081 |
| lnc-NAALADL2-14:1 | 1.224031 | 3.601229 | 4.898955 | 0.003478 | 0.113744 | -1.37185 |
| lnc-GCNT1-4:6     | 1.121543 | 1.752465 | 4.893596 | 0.003495 | 0.114055 | -1.37706 |
| lnc-TFDP3-1:1     | -1.4407  | 8.123646 | -4.89199 | 0.003501 | 0.114055 | -1.37862 |
| NONHSAT177192.1   | -1.28541 | 3.581281 | -4.89175 | 0.003501 | 0.114055 | -1.37885 |
| ENST00000521984.1 | -1.84665 | 2.574113 | -4.89157 | 0.003502 | 0.114055 | -1.37903 |
| MSTRG.32925.1     | 1.589356 | 2.240598 | 4.889158 | 0.00351  | 0.114112 | -1.38138 |
| lnc-TSPY4-8:1     | 1.767557 | 2.485028 | 4.888426 | 0.003512 | 0.114112 | -1.38209 |
| lnc-TAS2R1-13:1   | 2.09692  | 2.149513 | 4.885849 | 0.003521 | 0.114235 | -1.3846  |
| ENST00000508713.1 | -1.38456 | 5.325459 | -4.88462 | 0.003525 | 0.114286 | -1.3858  |
| lnc-POU4F2-1:1    | 1.685495 | 2.290693 | 4.882197 | 0.003533 | 0.114397 | -1.38816 |
| NONHSAT149085.1   | 2.358831 | 3.126099 | 4.880329 | 0.003539 | 0.114397 | -1.38998 |
| NONHSAT189312.1   | 1.376384 | 2.120642 | 4.879722 | 0.003541 | 0.114408 | -1.39057 |
| lnc-PRDM6-2:1     | -1.41695 | 2.800626 | -4.87738 | 0.003549 | 0.114527 | -1.39285 |
| lnc-C3orf30-11:1  | 1.724009 | 3.105536 | 4.875627 | 0.003555 | 0.114556 | -1.39457 |
| NR_110807         | -1.15993 | 2.706813 | -4.87518 | 0.003556 | 0.114568 | -1.39501 |
| ENST00000478759.2 | -1.06647 | 6.312511 | -4.87399 | 0.00356  | 0.11466  | -1.39616 |
| MSTRG.36858.1     | 1.161825 | 2.74882  | 4.869868 | 0.003574 | 0.114735 | -1.40019 |
| MSTRG.6619.1      | -1.10692 | 2.961009 | -4.86906 | 0.003577 | 0.114735 | -1.40098 |
| NONHSAT215045.1   | -1.55023 | 2.087583 | -4.86715 | 0.003583 | 0.114841 | -1.40284 |
| lnc-TENM1-4:1     | 1.112605 | 1.728447 | 4.865142 | 0.00359  | 0.11487  | -1.40481 |
| lnc-WNT2-3:1      | -1.00923 | 2.089842 | -4.86139 | 0.003603 | 0.115001 | -1.40848 |
| MSTRG.67257.46    | 1.508694 | 1.840872 | 4.860463 | 0.003606 | 0.115034 | -1.40938 |
| lnc-TMEM184C-7:1  | 1.273548 | 2.456874 | 4.859118 | 0.003611 | 0.115066 | -1.4107  |
| lnc-RFESD-1:1     | -1.37603 | 1.860103 | -4.85838 | 0.003613 | 0.115073 | -1.41142 |
| lnc-ASCL1-1:1     | -1.08037 | 1.845427 | -4.85785 | 0.003615 | 0.115094 | -1.41194 |
| MSTRG.22271.3     | -1.42182 | 2.664111 | -4.85567 | 0.003622 | 0.115106 | -1.41407 |
| T127511           | -1.45584 | 2.051382 | -4.85499 | 0.003625 | 0.115106 | -1.41474 |
| ENST00000443897.1 | 1.425629 | 1.831089 | 4.852918 | 0.003632 | 0.115106 | -1.41677 |
| lnc-ZFAT-11:1     | -1.30002 | 2.111862 | -4.85221 | 0.003634 | 0.115106 | -1.41746 |
| lnc-URB1-2:1      | 1.324019 | 2.139978 | 4.852068 | 0.003635 | 0.115106 | -1.4176  |
| NONHSAT205859.1   | 1.563241 | 1.890681 | 4.849764 | 0.003643 | 0.115165 | -1.41986 |
| lnc-TFPI2-2:1     | 1.168617 | 4.455551 | 4.849303 | 0.003644 | 0.115165 | -1.42031 |
| NONHSAT197629.1   | 1.467494 | 2.131939 | 4.84919  | 0.003645 | 0.115165 | -1.42042 |
| lnc-EEF2-3:1      | 1.216576 | 1.623476 | 4.848876 | 0.003646 | 0.115165 | -1.42073 |
| ENST00000588469.1 | 1.930259 | 2.582268 | 4.84487  | 0.00366  | 0.115282 | -1.42466 |
| T367518           | 1.596698 | 2.061854 | 4.844697 | 0.00366  | 0.115282 | -1.42483 |
| ENST00000665335.1 | -1.81474 | 3.386763 | -4.84135 | 0.003672 | 0.115373 | -1.42811 |
| lnc-RXRA-3:1      | -1.21676 | 1.794011 | -4.84134 | 0.003672 | 0.115373 | -1.42812 |
| lnc-PARVB-3:1     | -1.10393 | 7.501766 | -4.83885 | 0.00368  | 0.115537 | -1.43056 |
| NONHSAT190976.1   | -1.2298  | 3.422827 | -4.83647 | 0.003689 | 0.115727 | -1.43291 |
| ENST00000550309.1 | -1.13794 | 1.729599 | -4.83052 | 0.00371  | 0.116019 | -1.43875 |

|                   |          |          |          |          |          |          |
|-------------------|----------|----------|----------|----------|----------|----------|
| NONHSAT192184.1   | 1.034464 | 1.715155 | 4.82998  | 0.003712 | 0.116019 | -1.43928 |
| NONHSAT204997.1   | -1.34206 | 2.651804 | -4.82954 | 0.003713 | 0.116019 | -1.43971 |
| MSTRG.26388.1     | 1.218068 | 1.736865 | 4.828075 | 0.003718 | 0.116144 | -1.44115 |
| ENST00000518031.1 | 1.056607 | 2.422975 | 4.826657 | 0.003723 | 0.116264 | -1.44255 |
| MSTRG.15382.1     | 1.153998 | 4.80962  | 4.824696 | 0.00373  | 0.116336 | -1.44447 |
| NONHSAT221171.1   | -1.30844 | 2.435924 | -4.82242 | 0.003738 | 0.116365 | -1.44671 |
| NONHSAT189294.1   | -1.01996 | 7.719239 | -4.82058 | 0.003745 | 0.116365 | -1.44852 |
| MSTRG.31549.1     | 1.350251 | 1.704165 | 4.815436 | 0.003763 | 0.11656  | -1.45359 |
| lnc-F7-2:1        | -1.61401 | 2.253868 | -4.81524 | 0.003764 | 0.11656  | -1.45378 |
| NONHSAT202874.1   | 2.40272  | 3.209332 | 4.814304 | 0.003767 | 0.116598 | -1.45471 |
| lnc-FAM13B-3:1    | -1.01494 | 6.793683 | -4.81026 | 0.003782 | 0.116642 | -1.4587  |
| lnc-HPCAL1-2:1    | 1.244654 | 3.813765 | 4.809639 | 0.003784 | 0.116642 | -1.45931 |
| lnc-PITRM1-5:4    | 1.117653 | 7.282766 | 4.809453 | 0.003785 | 0.116642 | -1.45949 |
| lnc-BRF1-73:1     | 1.023505 | 3.811774 | 4.808472 | 0.003788 | 0.116642 | -1.46046 |
| MSTRG.13790.1     | -1.36275 | 2.092638 | -4.80834 | 0.003789 | 0.116642 | -1.46058 |
| NONHSAT208879.1   | 1.295787 | 1.709767 | 4.808336 | 0.003789 | 0.116642 | -1.46059 |
| lnc-RBM46-1:1     | -1.00494 | 8.771265 | -4.80597 | 0.003797 | 0.1167   | -1.46293 |
| lnc-ICA1-1:9      | -1.05726 | 3.052135 | -4.80557 | 0.003799 | 0.1167   | -1.46332 |
| NONHSAT190397.1   | -1.01735 | 8.97663  | -4.80121 | 0.003814 | 0.116829 | -1.46763 |
| lnc-PLEC-4:1      | 1.275319 | 1.976784 | 4.799466 | 0.003821 | 0.116916 | -1.46935 |
| lnc-ABCA8-3:1     | -1.72745 | 2.935849 | -4.79621 | 0.003832 | 0.117172 | -1.47257 |
| NONHSAT190483.1   | -1.14915 | 1.984329 | -4.79512 | 0.003836 | 0.117224 | -1.47364 |
| MSTRG.55394.1     | -1.02727 | 5.931586 | -4.7941  | 0.00384  | 0.117224 | -1.47465 |
| NONHSAT221818.1   | 1.342645 | 1.862509 | 4.793285 | 0.003843 | 0.117224 | -1.47546 |
| lnc-LIMS4-1:3     | 1.010048 | 9.100538 | 4.790889 | 0.003852 | 0.117268 | -1.47783 |
| MSTRG.33755.2     | -1.31498 | 2.311846 | -4.79027 | 0.003854 | 0.117268 | -1.47844 |
| lnc-MED4-7:1      | -1.0509  | 10.41991 | -4.78908 | 0.003859 | 0.117317 | -1.47962 |
| NONHSAT192231.1   | 1.527182 | 1.817026 | 4.788117 | 0.003862 | 0.117367 | -1.48057 |
| ENST00000671359.1 | 2.059097 | 3.973365 | 4.786122 | 0.003869 | 0.117406 | -1.48254 |
| NR_104061         | 1.705812 | 2.626644 | 4.782383 | 0.003883 | 0.117406 | -1.48625 |
| lnc-HAAO-5:2      | -1.2963  | 7.325922 | -4.7815  | 0.003887 | 0.117406 | -1.48713 |
| MSTRG.32996.1     | 1.681443 | 2.289296 | 4.781198 | 0.003888 | 0.117406 | -1.48742 |
| NR_125885         | 1.014607 | 5.481399 | 4.780834 | 0.003889 | 0.117406 | -1.48778 |
| lnc-DEPDC1-3:1    | -1.00696 | 7.461792 | -4.77972 | 0.003893 | 0.117496 | -1.48888 |
| NONHSAT161385.1   | 1.04295  | 4.122138 | 4.777958 | 0.0039   | 0.11753  | -1.49063 |
| ENST00000418927.2 | 1.00758  | 4.504336 | 4.777504 | 0.003901 | 0.11753  | -1.49108 |
| T309277           | 1.582983 | 2.145432 | 4.777225 | 0.003902 | 0.11753  | -1.49136 |
| ENST00000455848.1 | 1.227139 | 3.365522 | 4.775661 | 0.003908 | 0.117565 | -1.49291 |
| lnc-SLC36A2-1:1   | 1.165412 | 3.731918 | 4.774897 | 0.003911 | 0.117615 | -1.49367 |
| lnc-S1PR1-6:1     | -1.13365 | 11.2794  | -4.77301 | 0.003918 | 0.117651 | -1.49553 |
| lnc-PLXDC2-9:1    | -1.33769 | 4.935517 | -4.77135 | 0.003924 | 0.117736 | -1.49719 |
| lnc-CEP57-3:1     | -1.13486 | 9.442405 | -4.77002 | 0.003929 | 0.117738 | -1.49851 |
| NONHSAT187230.1   | 1.178594 | 1.689073 | 4.769755 | 0.00393  | 0.117738 | -1.49877 |
| ENST00000592440.1 | 1.166512 | 4.190192 | 4.768263 | 0.003936 | 0.117871 | -1.50025 |
| NONHSAT209188.1   | 1.492427 | 3.873043 | 4.766467 | 0.003943 | 0.117946 | -1.50203 |
| lnc-OSBPL8-1:1    | 1.309327 | 4.48427  | 4.7654   | 0.003947 | 0.117946 | -1.50309 |
| lnc-NYAP2-7:1     | 2.429425 | 2.844508 | 4.765203 | 0.003948 | 0.117946 | -1.50329 |
| T265256           | -2.18636 | 2.606315 | -4.76512 | 0.003948 | 0.117946 | -1.50337 |



|                   |          |          |          |          |          |          |
|-------------------|----------|----------|----------|----------|----------|----------|
| lnc-PARM1-2:1     | -1.24137 | 4.896087 | -4.76254 | 0.003958 | 0.118014 | -1.50593 |
| NONHSAT168350.1   | -1.4752  | 2.563921 | -4.76234 | 0.003958 | 0.118014 | -1.50613 |
| lnc-NTSR2-2:5     | 1.479673 | 4.183997 | 4.760949 | 0.003964 | 0.118032 | -1.50752 |
| NONHSAT182462.1   | -1.24765 | 1.969453 | -4.75976 | 0.003968 | 0.118131 | -1.50869 |
| ENST00000558463.1 | 1.585951 | 1.846749 | 4.751088 | 0.004001 | 0.118521 | -1.51733 |
| T050385           | -1.01095 | 5.94631  | -4.74923 | 0.004008 | 0.118662 | -1.51917 |
| NONHSAT187411.1   | -1.61056 | 4.3376   | -4.74685 | 0.004017 | 0.118722 | -1.52154 |
| T013215           | -1.0636  | 1.725102 | -4.74657 | 0.004019 | 0.118722 | -1.52183 |
| lnc-FOXG1-12:2    | -1.44955 | 2.35252  | -4.74577 | 0.004022 | 0.118771 | -1.52262 |
| ENST00000638312.1 | 1.776989 | 2.026059 | 4.744094 | 0.004028 | 0.118795 | -1.52429 |
| ENST00000415202.1 | -1.42946 | 2.128943 | -4.74243 | 0.004035 | 0.118844 | -1.52595 |
| T363976           | -1.361   | 7.61812  | -4.7422  | 0.004035 | 0.118844 | -1.52618 |
| MSTRG.28246.1     | -1.03967 | 5.094294 | -4.74183 | 0.004037 | 0.118844 | -1.52655 |
| NONHSAT180730.1   | -1.08822 | 9.015676 | -4.74091 | 0.00404  | 0.118845 | -1.52746 |
| NONHSAT193687.1   | 1.005543 | 6.48338  | 4.735991 | 0.00406  | 0.119199 | -1.53237 |
| lnc-PRR29-5:1     | -1.31978 | 1.868501 | -4.73516 | 0.004063 | 0.119259 | -1.5332  |
| T282056           | -1.14406 | 3.219769 | -4.7319  | 0.004076 | 0.11939  | -1.53645 |
| NONHSAT201516.1   | 2.14348  | 4.503702 | 4.728964 | 0.004087 | 0.119484 | -1.53939 |
| MSTRG.33538.1     | 1.223759 | 3.375292 | 4.7269   | 0.004095 | 0.119499 | -1.54145 |
| NONHSAT184740.1   | -1.10627 | 3.452924 | -4.72555 | 0.0041   | 0.119499 | -1.5428  |
| MSTRG.17877.2     | -1.61201 | 2.201216 | -4.72211 | 0.004114 | 0.119669 | -1.54624 |
| MSTRG.5890.1      | -1.91316 | 2.084856 | -4.72176 | 0.004115 | 0.119669 | -1.54659 |
| NONHSAT210367.1   | 1.59489  | 2.358541 | 4.720703 | 0.00412  | 0.119691 | -1.54765 |
| MSTRG.53837.1     | 1.814599 | 2.332173 | 4.720077 | 0.004122 | 0.119694 | -1.54827 |
| lnc-TNFAIP8L1-3:1 | -1.00056 | 11.25064 | -4.71937 | 0.004125 | 0.119694 | -1.54898 |
| ENST00000419944.1 | 2.21333  | 2.591496 | 4.715126 | 0.004142 | 0.119938 | -1.55323 |
| NONHSAT207890.1   | 1.229732 | 3.983156 | 4.712037 | 0.004154 | 0.120094 | -1.55632 |
| NONHSAT176558.1   | 2.060944 | 2.923277 | 4.711505 | 0.004156 | 0.120094 | -1.55686 |
| ENST00000669532.1 | -1.16534 | 3.007011 | -4.71088 | 0.004159 | 0.120094 | -1.55748 |
| NONHSAT190511.1   | 2.156777 | 2.425446 | 4.710464 | 0.00416  | 0.120094 | -1.5579  |
| NONHSAT149915.1   | 1.266629 | 4.165632 | 4.710067 | 0.004162 | 0.120094 | -1.5583  |
| lnc-TSHZ2-7:1     | -1.04031 | 5.030633 | -4.70975 | 0.004163 | 0.120094 | -1.55862 |
| CYP4A22-AS1:1     | -1.07203 | 3.10359  | -4.70931 | 0.004165 | 0.120094 | -1.55905 |
| ENST00000420828.1 | -1.43465 | 1.952667 | -4.70754 | 0.004172 | 0.120096 | -1.56083 |
| ENST00000549291.1 | 1.097809 | 1.656913 | 4.706801 | 0.004175 | 0.120096 | -1.56157 |
| lnc-EXTL3-8:1     | -1.03062 | 9.994665 | -4.70666 | 0.004176 | 0.120096 | -1.56171 |
| lnc-ENKUR-5:1     | 1.752944 | 1.905005 | 4.705572 | 0.00418  | 0.120096 | -1.5628  |
| NONHSAT186932.1   | 1.735011 | 2.195341 | 4.703372 | 0.004189 | 0.120199 | -1.56501 |
| lnc-RTCA-2:1      | 1.357067 | 1.745732 | 4.700558 | 0.0042   | 0.120272 | -1.56783 |
| ENST00000669860.1 | -1.2205  | 2.169282 | -4.69978 | 0.004204 | 0.120272 | -1.56861 |
| ENST00000653126.1 | -1.57456 | 4.93136  | -4.69689 | 0.004215 | 0.120505 | -1.57152 |
| ENST00000534827.5 | -1.36985 | 7.997369 | -4.69662 | 0.004216 | 0.120505 | -1.57179 |
| lnc-RXFP4-5:1     | -1.23849 | 2.787405 | -4.69616 | 0.004218 | 0.120522 | -1.57225 |
| NONHSAT204799.1   | 1.522772 | 2.925041 | 4.695826 | 0.00422  | 0.120522 | -1.57258 |
| NONHSAT215556.1   | 1.385328 | 1.987492 | 4.695331 | 0.004222 | 0.120522 | -1.57308 |
| NONHSAT217428.1   | 1.752106 | 3.793622 | 4.695301 | 0.004222 | 0.120522 | -1.57311 |
| lnc-TAT-6:1       | 2.067868 | 3.01149  | 4.694776 | 0.004224 | 0.120526 | -1.57364 |
| lnc-DNAH8-1:1     | 1.601978 | 2.356224 | 4.694673 | 0.004224 | 0.120526 | -1.57374 |

|                    |          |          |          |          |          |          |
|--------------------|----------|----------|----------|----------|----------|----------|
| lnc-PEX16-1:1      | 1.03691  | 3.931338 | 4.691567 | 0.004237 | 0.120677 | -1.57686 |
| NONHSAT178542.1    | 1.58632  | 2.075577 | 4.690819 | 0.00424  | 0.120696 | -1.57761 |
| NONHSAT221748.1    | 1.784337 | 2.585859 | 4.690192 | 0.004243 | 0.120696 | -1.57824 |
| NONHSAT164695.1    | -1.22413 | 4.100361 | -4.68972 | 0.004245 | 0.120696 | -1.57872 |
| NONHSAT189667.1    | 1.103913 | 4.176266 | 4.689645 | 0.004245 | 0.120696 | -1.57879 |
| lnc-BOD1-6:1       | -1.00106 | 8.841307 | -4.68936 | 0.004246 | 0.120696 | -1.57908 |
| lnc-KIDINS220-12:2 | 1.237265 | 4.373216 | 4.687986 | 0.004252 | 0.120736 | -1.58046 |
| lnc-CCDC122-4:1    | -1.44221 | 2.842666 | -4.68713 | 0.004255 | 0.120736 | -1.58133 |
| ENST00000579752.1  | 1.15634  | 1.662422 | 4.686429 | 0.004258 | 0.120738 | -1.58203 |
| lnc-SFTA3-1:3      | -1.0738  | 8.465377 | -4.68575 | 0.004261 | 0.120758 | -1.58272 |
| NONHSAT216558.1    | -1.2129  | 9.202753 | -4.68558 | 0.004262 | 0.120758 | -1.58288 |
| NONHSAT167206.1    | -1.20341 | 1.939925 | -4.68539 | 0.004262 | 0.120758 | -1.58308 |
| NONHSAT223997.1    | -1.3753  | 5.847673 | -4.68481 | 0.004265 | 0.120785 | -1.58365 |
| lnc-VIRMA-3:1      | -1.04192 | 3.284062 | -4.68448 | 0.004266 | 0.120785 | -1.58399 |
| MSTRG.29187.1      | 1.38847  | 2.119944 | 4.683476 | 0.00427  | 0.12081  | -1.585   |
| MSTRG.64863.1      | -1.59408 | 4.448543 | -4.6823  | 0.004275 | 0.12081  | -1.58619 |
| ENST00000432706.1  | 1.311556 | 3.665835 | 4.681753 | 0.004277 | 0.12081  | -1.58673 |
| T119058            | -1.30847 | 2.834977 | -4.68108 | 0.00428  | 0.120817 | -1.58741 |
| ENST00000652083.2  | -1.03065 | 1.670872 | -4.67899 | 0.004289 | 0.120897 | -1.58952 |
| NONHSAT221766.1    | -1.35814 | 5.798307 | -4.67456 | 0.004307 | 0.12106  | -1.59398 |
| lnc-SF3B1-4:1      | 1.372367 | 2.02129  | 4.674058 | 0.004309 | 0.12106  | -1.59448 |
| NONHSAT212214.1    | 1.420911 | 7.346703 | 4.673365 | 0.004312 | 0.121083 | -1.59518 |
| lnc-MPPE1-15:1     | -1.19931 | 6.536727 | -4.67282 | 0.004315 | 0.121103 | -1.59573 |
| lnc-SH3RF2-6:1     | -1.05821 | 6.812527 | -4.67261 | 0.004315 | 0.121103 | -1.59594 |
| NONHSAT176788.1    | 1.471209 | 2.051763 | 4.668476 | 0.004333 | 0.121421 | -1.60011 |
| lnc-HTR3D-2:1      | 2.916101 | 6.007367 | 4.666142 | 0.004343 | 0.121431 | -1.60247 |
| MSTRG.9325.1       | 1.863788 | 2.460505 | 4.665725 | 0.004344 | 0.121431 | -1.60289 |
| lnc-CAPN13-3:1     | -1.38556 | 2.924783 | -4.66484 | 0.004348 | 0.121431 | -1.60378 |
| lnc-CIPC-4:1       | 1.641066 | 1.881941 | 4.664799 | 0.004348 | 0.121431 | -1.60382 |
| NONHSAT205586.1    | 1.734437 | 3.642231 | 4.664572 | 0.004349 | 0.121431 | -1.60405 |
| ENST00000519550.1  | 1.75946  | 2.243079 | 4.663772 | 0.004353 | 0.121436 | -1.60486 |
| NONHSAT150648.1    | -1.19213 | 2.665705 | -4.65946 | 0.004371 | 0.121698 | -1.60922 |
| MSTRG.8317.1       | -1.05441 | 1.989826 | -4.65898 | 0.004373 | 0.121698 | -1.6097  |
| MSTRG.17828.1      | 1.626562 | 2.023929 | 4.655418 | 0.004388 | 0.122053 | -1.6133  |
| lnc-FAM184A-2:1    | -1.68136 | 2.846853 | -4.65073 | 0.004408 | 0.122323 | -1.61804 |
| lnc-RAB6C-9:1      | -1.68609 | 2.441103 | -4.6501  | 0.004411 | 0.122323 | -1.61867 |
| ENST00000671647.1  | -1.5123  | 2.118298 | -4.65002 | 0.004411 | 0.122323 | -1.61876 |
| NONHSAT166694.1    | -1.26154 | 2.081641 | -4.64497 | 0.004433 | 0.122561 | -1.62387 |
| lnc-EDN2-2:7       | 2.566697 | 2.370652 | 4.644864 | 0.004433 | 0.122561 | -1.62398 |
| ENST00000623207.1  | -1.37252 | 3.240645 | -4.6416  | 0.004447 | 0.122712 | -1.62728 |
| ENST00000533812.6  | 1.556677 | 2.29901  | 4.63672  | 0.004468 | 0.122952 | -1.63223 |
| MSTRG.23692.1      | 1.904161 | 2.409225 | 4.633389 | 0.004483 | 0.123133 | -1.63561 |
| lnc-UCHL5-9:2      | 1.202073 | 2.023729 | 4.63266  | 0.004486 | 0.123135 | -1.63635 |
| NONHSAT153720.1    | 1.259293 | 4.120266 | 4.632528 | 0.004487 | 0.123135 | -1.63648 |
| lnc-SLC35G4-3:2    | 1.993536 | 3.003082 | 4.630608 | 0.004495 | 0.123299 | -1.63843 |
| NONHSAT174565.1    | 1.306417 | 2.343198 | 4.626316 | 0.004514 | 0.123446 | -1.64278 |
| NONHSAT201319.1    | 1.551876 | 1.894058 | 4.626261 | 0.004514 | 0.123446 | -1.64284 |
| NONHSAT188193.1    | 1.175059 | 2.351744 | 4.624585 | 0.004522 | 0.123522 | -1.64454 |

|                   |          |          |          |          |          |          |
|-------------------|----------|----------|----------|----------|----------|----------|
| NONHSAT176708.1   | 1.170419 | 2.02773  | 4.62276  | 0.00453  | 0.123674 | -1.6464  |
| lnc-CD163-3:1     | 1.179668 | 4.415744 | 4.621194 | 0.004537 | 0.123762 | -1.64799 |
| NONHSAT210513.1   | -1.50531 | 3.107273 | -4.62082 | 0.004538 | 0.123774 | -1.64837 |
| NONHSAT170176.1   | -1.04752 | 4.881485 | -4.62025 | 0.004541 | 0.12381  | -1.64895 |
| ENST00000501886.2 | -1.60581 | 1.973448 | -4.61984 | 0.004543 | 0.123825 | -1.64936 |
| lnc-CDKN1B-1:1    | 1.042631 | 2.531226 | 4.618785 | 0.004547 | 0.123886 | -1.65044 |
| lnc-CALM3-2:1     | -1.2773  | 2.063928 | -4.61777 | 0.004552 | 0.12389  | -1.65147 |
| lnc-ZNF704-2:1    | -1.00091 | 5.382348 | -4.61734 | 0.004554 | 0.12389  | -1.65191 |
| lnc-TMEM132B-19:1 | -1.00113 | 1.652007 | -4.61709 | 0.004555 | 0.12389  | -1.65216 |
| lnc-ACP5-3:1      | 1.028097 | 1.753102 | 4.616358 | 0.004558 | 0.123945 | -1.65291 |
| lnc-RIMBP2-7:1    | -1.10689 | 10.46464 | -4.61578 | 0.004561 | 0.12398  | -1.65349 |
| lnc-NRG2-4:1      | -1.94557 | 3.205654 | -4.61331 | 0.004572 | 0.12398  | -1.65601 |
| lnc-MBL2-1:1      | -1.55851 | 2.049779 | -4.61304 | 0.004573 | 0.12398  | -1.65628 |
| NONHSAT186640.1   | 1.506105 | 1.861056 | 4.612702 | 0.004574 | 0.123987 | -1.65663 |
| ENST00000524252.1 | 1.036131 | 5.471206 | 4.612427 | 0.004576 | 0.123987 | -1.65691 |
| ENST00000622160.1 | 1.136201 | 3.784302 | 4.608994 | 0.004591 | 0.124257 | -1.6604  |
| ENST00000667208.1 | -1.28738 | 2.063503 | -4.60537 | 0.004607 | 0.124545 | -1.66409 |
| NONHSAT190488.1   | -1.31869 | 2.146242 | -4.6034  | 0.004616 | 0.124636 | -1.66609 |
| ENST00000422042.1 | -1.02438 | 4.095565 | -4.60204 | 0.004622 | 0.124672 | -1.66749 |
| MSTRG.56866.1     | -1.01341 | 4.285943 | -4.60152 | 0.004625 | 0.12468  | -1.66802 |
| NONHSAT221788.1   | 1.193626 | 2.932719 | 4.599799 | 0.004632 | 0.124733 | -1.66977 |
| lnc-CDH3-3:1      | 1.815566 | 2.340352 | 4.599711 | 0.004633 | 0.124733 | -1.66986 |
| NONHSAT187149.1   | 1.139183 | 5.359278 | 4.598745 | 0.004637 | 0.124733 | -1.67085 |
| MSTRG.11503.1     | 1.246257 | 2.173861 | 4.597681 | 0.004642 | 0.124733 | -1.67193 |
| MSTRG.49105.1     | -1.40055 | 3.088696 | -4.59745 | 0.004643 | 0.124733 | -1.67217 |
| NONHSAT172982.1   | 1.05661  | 1.727722 | 4.595791 | 0.004651 | 0.124733 | -1.67386 |
| lnc-SCUBE3-2:1    | -1.35988 | 1.994479 | -4.59173 | 0.004669 | 0.12498  | -1.678   |
| NONHSAT167611.1   | -2.2587  | 2.463156 | -4.59084 | 0.004673 | 0.125007 | -1.67892 |
| T191967           | -1.45113 | 1.91278  | -4.59069 | 0.004674 | 0.125007 | -1.67907 |
| NONHSAT207916.1   | 1.525514 | 2.78656  | 4.590188 | 0.004676 | 0.125009 | -1.67958 |
| lnc-ZKSCAN2-7:1   | -1.27794 | 10.44386 | -4.59012 | 0.004676 | 0.125009 | -1.67964 |
| T276829           | 1.659606 | 2.881426 | 4.587124 | 0.00469  | 0.125164 | -1.68271 |
| lnc-HOOK1-6:1     | 1.485606 | 1.763723 | 4.586543 | 0.004693 | 0.125183 | -1.6833  |
| MSTRG.27914.1     | 2.285002 | 2.222483 | 4.584965 | 0.0047   | 0.125297 | -1.68492 |
| ENST00000428485.1 | -1.25867 | 2.008998 | -4.58399 | 0.004705 | 0.125331 | -1.68591 |
| NR_026755         | -1.46901 | 3.596913 | -4.58122 | 0.004718 | 0.125498 | -1.68875 |
| NONHSAT210569.1   | 1.066302 | 3.080041 | 4.580622 | 0.00472  | 0.125504 | -1.68936 |
| MSTRG.6336.1      | -1.18276 | 3.77205  | -4.58043 | 0.004721 | 0.125504 | -1.68955 |
| MSTRG.63542.1     | 1.345263 | 1.847778 | 4.578807 | 0.004729 | 0.125532 | -1.69121 |
| lnc-KLF4-15:2     | 1.005928 | 3.981177 | 4.576177 | 0.004741 | 0.125665 | -1.69391 |
| MSTRG.50194.7     | 2.308354 | 2.360553 | 4.575503 | 0.004744 | 0.125682 | -1.6946  |
| NONHSAT194231.1   | -1.08059 | 4.502372 | -4.57404 | 0.004751 | 0.125784 | -1.69609 |
| ENST00000419211.2 | 1.250767 | 3.719177 | 4.573878 | 0.004752 | 0.125784 | -1.69626 |
| ENST00000453866.1 | -1.58698 | 2.418653 | -4.57264 | 0.004757 | 0.125876 | -1.69752 |
| NONHSAT174775.1   | 1.106991 | 3.651923 | 4.571526 | 0.004763 | 0.125876 | -1.69867 |
| lnc-TMSB15A-6:1   | -1.3355  | 2.66217  | -4.56802 | 0.004779 | 0.125981 | -1.70226 |
| MSTRG.40922.1     | 1.121015 | 1.66474  | 4.56791  | 0.00478  | 0.125981 | -1.70237 |
| lnc-CCT5-14:1     | -1.76528 | 3.013514 | -4.56719 | 0.004783 | 0.125981 | -1.70311 |

|                   |          |          |          |          |          |          |
|-------------------|----------|----------|----------|----------|----------|----------|
| lnc-SERTM2-5:1    | -1.06636 | 3.210309 | -4.56679 | 0.004785 | 0.125981 | -1.70352 |
| NONHSAT156824.1   | 1.655726 | 1.94814  | 4.56603  | 0.004788 | 0.126003 | -1.7043  |
| lnc-FAM81B-1:1    | 1.293838 | 4.976912 | 4.559183 | 0.004821 | 0.126326 | -1.71133 |
| ENST00000647271.1 | 1.372653 | 3.069073 | 4.556998 | 0.004831 | 0.126494 | -1.71357 |
| lnc-UGT1A1-2:1    | -1.80713 | 2.206133 | -4.55558 | 0.004838 | 0.126522 | -1.71503 |
| ENST00000666655.1 | 1.914312 | 2.049681 | 4.55439  | 0.004844 | 0.126553 | -1.71625 |
| lnc-SBF2-1:2      | 1.106109 | 3.944852 | 4.553362 | 0.004848 | 0.126553 | -1.7173  |
| NONHSAT169054.1   | 1.025545 | 4.814912 | 4.549827 | 0.004865 | 0.126634 | -1.72094 |
| lnc-ZNF257-4:1    | -1.05631 | 1.915735 | -4.54939 | 0.004867 | 0.126654 | -1.72139 |
| MSTRG.16488.1     | -1.7253  | 3.698303 | -4.54634 | 0.004882 | 0.126654 | -1.72452 |
| ENST00000671045.1 | -1.21648 | 2.025947 | -4.54536 | 0.004887 | 0.126654 | -1.72552 |
| MSTRG.52951.1     | 1.255799 | 1.93003  | 4.544351 | 0.004892 | 0.126677 | -1.72657 |
| lnc-GKN2-1:1      | 1.184833 | 1.713591 | 4.541457 | 0.004906 | 0.126817 | -1.72955 |
| lnc-RAB1A-9:1     | -1.42566 | 2.552774 | -4.54108 | 0.004908 | 0.126817 | -1.72993 |
| ENST00000470427.1 | -1.27917 | 5.157939 | -4.53977 | 0.004914 | 0.126817 | -1.73128 |
| ENST00000431656.1 | -1.39266 | 2.70403  | -4.5395  | 0.004915 | 0.126817 | -1.73156 |
| lnc-SLC35C1-83:12 | -1.25996 | 2.964843 | -4.53926 | 0.004916 | 0.126817 | -1.7318  |
| MSTRG.45455.10    | -1.30303 | 5.468396 | -4.53899 | 0.004918 | 0.126817 | -1.73209 |
| ENST00000319682.2 | 1.898218 | 2.82668  | 4.535927 | 0.004933 | 0.126929 | -1.73524 |
| lnc-PP2D1-1:1     | 1.229279 | 4.044216 | 4.535463 | 0.004935 | 0.126929 | -1.73572 |
| lnc-CCNK-5:1      | -1.26733 | 2.223974 | -4.53499 | 0.004937 | 0.126929 | -1.73621 |
| ENST00000526131.1 | 1.703666 | 3.527517 | 4.534295 | 0.004941 | 0.126945 | -1.73692 |
| NONHSAT205868.1   | 1.349446 | 1.950568 | 4.533571 | 0.004944 | 0.126945 | -1.73767 |
| lnc-EGR3-7:1      | -1.68191 | 4.535721 | -4.53312 | 0.004946 | 0.126969 | -1.73813 |
| NONHSAT167621.1   | 1.810981 | 2.420432 | 4.529261 | 0.004965 | 0.127172 | -1.74211 |
| NONHSAT201203.1   | -1.15602 | 2.656147 | -4.52909 | 0.004966 | 0.127172 | -1.74229 |
| NR_038399         | 1.303884 | 2.835435 | 4.528948 | 0.004967 | 0.127172 | -1.74243 |
| ENST00000435111.1 | -1.01761 | 9.273557 | -4.52811 | 0.004971 | 0.127172 | -1.7433  |
| lnc-ORAOV1-3:3    | 1.693198 | 2.515112 | 4.527969 | 0.004971 | 0.127172 | -1.74344 |
| lnc-CXADR-7:1     | 2.029146 | 3.024064 | 4.526985 | 0.004976 | 0.127255 | -1.74446 |
| ENST00000654027.1 | -1.2876  | 3.961029 | -4.52556 | 0.004983 | 0.127403 | -1.74593 |
| NONHSAT211073.1   | 1.098509 | 4.383591 | 4.524056 | 0.004991 | 0.127448 | -1.74748 |
| NONHSAT177069.1   | 2.325938 | 3.05134  | 4.523257 | 0.004995 | 0.127448 | -1.74831 |
| NONHSAT208139.1   | 2.272467 | 2.836097 | 4.523151 | 0.004995 | 0.127448 | -1.74842 |
| MSTRG.31289.6     | -1.01665 | 3.028163 | -4.52147 | 0.005004 | 0.127566 | -1.75015 |
| lnc-PLCL2-11:1    | 1.947943 | 2.451543 | 4.520057 | 0.005011 | 0.127645 | -1.75161 |
| NONHSAT220956.1   | -1.36142 | 3.036589 | -4.51858 | 0.005018 | 0.127731 | -1.75313 |
| T190093           | 1.491649 | 2.084939 | 4.518285 | 0.005019 | 0.127731 | -1.75344 |
| NONHSAT191803.1   | 1.248904 | 3.639518 | 4.51809  | 0.00502  | 0.127731 | -1.75364 |
| lnc-CLEC19A-3:1   | -1.09733 | 5.517658 | -4.51782 | 0.005022 | 0.127731 | -1.75392 |
| lnc-DNAH5-4:1     | 1.179786 | 2.349297 | 4.516808 | 0.005027 | 0.127765 | -1.75497 |
| LINC00347:6       | 1.040392 | 1.96166  | 4.516283 | 0.005029 | 0.127789 | -1.75551 |
| lnc-MAGI1-2:1     | 1.168173 | 1.672941 | 4.515115 | 0.005035 | 0.127789 | -1.75672 |
| NONHSAT157329.1   | 1.153283 | 2.218856 | 4.514173 | 0.00504  | 0.127798 | -1.75769 |
| NONHSAT210220.1   | 1.277214 | 4.33016  | 4.508584 | 0.005068 | 0.12808  | -1.76347 |
| ENST00000320372.9 | -1.57671 | 2.517364 | -4.50702 | 0.005076 | 0.128171 | -1.76509 |
| lnc-ANKRD55-8:1   | 2.21295  | 2.705121 | 4.506624 | 0.005078 | 0.128189 | -1.7655  |
| lnc-PTBP2-12:2    | -1.13314 | 7.724015 | -4.50327 | 0.005095 | 0.128284 | -1.76897 |

|                   |          |          |          |          |          |          |
|-------------------|----------|----------|----------|----------|----------|----------|
| lnc-TIMM21-9:1    | 1.283527 | 1.791058 | 4.50194  | 0.005101 | 0.128284 | -1.77035 |
| lnc-MAGEB2-1:1    | -1.35598 | 7.669247 | -4.50098 | 0.005106 | 0.128284 | -1.77134 |
| lnc-RPL21-6:1     | -1.056   | 3.743599 | -4.4984  | 0.005119 | 0.128335 | -1.77402 |
| NONHSAT210587.1   | -1.29435 | 2.2631   | -4.49803 | 0.005121 | 0.128335 | -1.7744  |
| lnc-TMC6-7:1      | 3.328001 | 4.081536 | 4.497414 | 0.005124 | 0.128335 | -1.77504 |
| ENST00000561123.2 | 1.18241  | 2.668883 | 4.496949 | 0.005127 | 0.128335 | -1.77552 |
| T073551           | 1.313362 | 2.217932 | 4.496844 | 0.005127 | 0.128335 | -1.77563 |
| MSTRG.25122.1     | -1.97227 | 2.675608 | -4.49629 | 0.00513  | 0.128348 | -1.77621 |
| NONHSAT196277.1   | 1.498272 | 3.836394 | 4.492724 | 0.005148 | 0.128491 | -1.7799  |
| lnc-SGMS2-1:1     | -1.58111 | 2.844533 | -4.49111 | 0.005156 | 0.128491 | -1.78157 |
| lnc-UNC93A-3:1    | -1.03393 | 2.827746 | -4.49067 | 0.005159 | 0.128491 | -1.78203 |
| LINC01503:4       | -1.13479 | 2.319491 | -4.4904  | 0.00516  | 0.128491 | -1.78231 |
| T049511           | 1.011246 | 2.137849 | 4.48883  | 0.005168 | 0.128491 | -1.78394 |
| lnc-CD300C-1:1    | -1.42637 | 7.576867 | -4.4864  | 0.005181 | 0.128561 | -1.78646 |
| lnc-CCKAR-6:1     | 1.209552 | 4.170615 | 4.486132 | 0.005182 | 0.128561 | -1.78674 |
| lnc-SEL1L3-13:1   | 1.522029 | 2.099116 | 4.483135 | 0.005198 | 0.128827 | -1.78985 |
| NONHSAT157860.1   | -1.17233 | 3.806332 | -4.48165 | 0.005205 | 0.128891 | -1.7914  |
| lnc-PATE2-1:1     | -1.01804 | 2.873187 | -4.48057 | 0.005211 | 0.128935 | -1.79252 |
| ENST00000657726.1 | -1.07243 | 1.669371 | -4.47929 | 0.005217 | 0.128977 | -1.79385 |
| NONHSAT190182.1   | 1.018371 | 1.607254 | 4.479008 | 0.005219 | 0.128977 | -1.79414 |
| ENST00000663983.1 | 1.273615 | 2.77163  | 4.477282 | 0.005228 | 0.129096 | -1.79594 |
| NONHSAT179917.1   | -1.30076 | 2.913714 | -4.47584 | 0.005235 | 0.129217 | -1.79743 |
| ENST00000664386.1 | 1.749173 | 1.978049 | 4.47263  | 0.005252 | 0.129323 | -1.80077 |
| lnc-FAM3B-7:1     | 1.266794 | 6.41231  | 4.469997 | 0.005266 | 0.129505 | -1.80352 |
| MSTRG.7360.1      | 1.494002 | 2.861688 | 4.46804  | 0.005276 | 0.129566 | -1.80555 |
| ENST00000548488.1 | -2.61903 | 5.80381  | -4.46738 | 0.00528  | 0.129566 | -1.80624 |
| ENST00000607296.1 | 1.082594 | 4.934749 | 4.467327 | 0.00528  | 0.129566 | -1.80629 |
| MSTRG.12629.1     | -1.68034 | 2.220256 | -4.4665  | 0.005284 | 0.129586 | -1.80715 |
| lnc-ULBP2-25:1    | -1.24877 | 2.08802  | -4.46644 | 0.005285 | 0.129586 | -1.80722 |
| lnc-PGAP1-4:1     | 1.026847 | 5.155881 | 4.465988 | 0.005287 | 0.129613 | -1.80769 |
| NONHSAT215815.1   | 1.113771 | 2.074298 | 4.464027 | 0.005297 | 0.129772 | -1.80973 |
| NONHSAT153688.1   | 1.237517 | 1.794371 | 4.461182 | 0.005312 | 0.129983 | -1.8127  |
| NONHSAT173633.1   | 1.094092 | 2.322344 | 4.460925 | 0.005314 | 0.129985 | -1.81297 |
| ENST00000505567.1 | -1.06499 | 1.969006 | -4.45963 | 0.005321 | 0.130059 | -1.81432 |
| lnc-C4orf33-7:1   | -1.05737 | 2.822167 | -4.45735 | 0.005333 | 0.130292 | -1.8167  |
| lnc-ADAMTS5-6:1   | 1.776424 | 2.731878 | 4.456025 | 0.00534  | 0.130422 | -1.81808 |
| lnc-CLCC1-1:1     | -1.01151 | 7.654671 | -4.45434 | 0.005349 | 0.13055  | -1.81984 |
| lnc-AMELY-10:1    | -1.34448 | 5.817304 | -4.45415 | 0.00535  | 0.13055  | -1.82003 |
| NONHSAT169428.1   | 1.073915 | 1.661158 | 4.452613 | 0.005358 | 0.130589 | -1.82164 |
| NONHSAT213998.1   | 1.588192 | 2.163522 | 4.452184 | 0.00536  | 0.130589 | -1.82208 |
| NONHSAT187843.1   | 1.000034 | 1.907711 | 4.452116 | 0.005361 | 0.130589 | -1.82216 |
| lnc-NEMF-5:1      | 1.360062 | 2.109967 | 4.451717 | 0.005363 | 0.130589 | -1.82257 |
| NONHSAT195870.1   | 1.042876 | 3.042735 | 4.451211 | 0.005366 | 0.130589 | -1.8231  |
| NONHSAT191907.1   | 1.269978 | 3.7234   | 4.446121 | 0.005393 | 0.130966 | -1.82842 |
| NR_109894         | 1.316125 | 3.79687  | 4.445273 | 0.005398 | 0.130966 | -1.8293  |
| NONHSAT215675.1   | 1.355816 | 2.036939 | 4.445116 | 0.005398 | 0.130966 | -1.82947 |
| MSTRG.5976.1      | 1.985059 | 2.649515 | 4.441694 | 0.005417 | 0.131233 | -1.83304 |
| G2E3-AS1:12       | -1.52988 | 2.30479  | -4.44027 | 0.005425 | 0.131295 | -1.83453 |

|                   |          |          |          |          |          |          |
|-------------------|----------|----------|----------|----------|----------|----------|
| MSTRG.62878.1     | -1.56575 | 2.648334 | -4.43834 | 0.005435 | 0.131349 | -1.83655 |
| ENST00000557025.1 | 1.162942 | 2.204005 | 4.438286 | 0.005435 | 0.131349 | -1.83661 |
| NONHSAT218745.1   | 1.314286 | 3.555847 | 4.438163 | 0.005436 | 0.131349 | -1.83674 |
| ENST00000601280.1 | -1.45544 | 2.145091 | -4.43764 | 0.005439 | 0.131357 | -1.83728 |
| lnc-RAD23B-11:1   | 1.196865 | 1.933677 | 4.436997 | 0.005442 | 0.131357 | -1.83796 |
| lnc-OLFM1-2:1     | 1.772418 | 1.910252 | 4.432238 | 0.005468 | 0.131641 | -1.84294 |
| T236072           | 1.308062 | 1.979286 | 4.430413 | 0.005478 | 0.131707 | -1.84485 |
| ENST00000663385.1 | -1.12137 | 1.753497 | -4.43021 | 0.00548  | 0.131707 | -1.84506 |
| lnc-GDE1-4:1      | -1.63137 | 3.432861 | -4.42927 | 0.005485 | 0.131726 | -1.84605 |
| MSTRG.49773.1     | -1.57619 | 2.826213 | -4.42885 | 0.005487 | 0.131729 | -1.84648 |
| NONHSAT201899.1   | 1.490602 | 4.363607 | 4.427196 | 0.005496 | 0.131845 | -1.84822 |
| lnc-LIPC-4:1      | -1.04525 | 7.118168 | -4.42629 | 0.005501 | 0.131845 | -1.84917 |
| T080916           | -1.37113 | 1.870656 | -4.42622 | 0.005502 | 0.131845 | -1.84924 |
| NONHSAT175857.1   | 1.302423 | 1.918039 | 4.42583  | 0.005504 | 0.131845 | -1.84965 |
| lnc-TARSL2-3:1    | 1.173507 | 3.756832 | 4.420797 | 0.005532 | 0.131845 | -1.85493 |
| NONHSAT218609.1   | 1.105618 | 4.484562 | 4.420065 | 0.005536 | 0.131845 | -1.8557  |
| MSTRG.60768.1     | 1.600451 | 2.4734   | 4.418786 | 0.005543 | 0.131873 | -1.85704 |
| NONHSAT156781.1   | 1.052893 | 4.622002 | 4.416589 | 0.005555 | 0.131978 | -1.85935 |
| NONHSAT222661.1   | 1.689985 | 3.027067 | 4.415815 | 0.005559 | 0.132049 | -1.86016 |
| lnc-FER-18:2      | 1.317202 | 3.223739 | 4.41413  | 0.005569 | 0.132149 | -1.86193 |
| lnc-NXPH1-3:1     | -1.07593 | 1.965582 | -4.41346 | 0.005572 | 0.132151 | -1.86263 |
| lnc-UQCRFS1-6:1   | 1.409416 | 2.441485 | 4.412864 | 0.005576 | 0.132151 | -1.86326 |
| lnc-RLF-4:1       | -1.08857 | 5.509698 | -4.41188 | 0.005581 | 0.132151 | -1.8643  |
| NONHSAT164739.1   | 1.327198 | 1.755273 | 4.409923 | 0.005592 | 0.132343 | -1.86635 |
| NONHSAT211997.1   | -1.63469 | 2.243881 | -4.40906 | 0.005597 | 0.132343 | -1.86725 |
| lnc-CYTL1-5:1     | -1.48477 | 2.430601 | -4.4087  | 0.005599 | 0.132343 | -1.86763 |
| lnc-MYT1L-1:4     | 2.096179 | 2.894152 | 4.405993 | 0.005614 | 0.132393 | -1.87048 |
| lnc-NR3C1-3:1     | -1.52286 | 2.365461 | -4.40506 | 0.00562  | 0.132455 | -1.87146 |
| lnc-OSBP-1:3      | 1.10471  | 4.495019 | 4.402687 | 0.005633 | 0.132614 | -1.87395 |
| NONHSAT214428.1   | 1.529467 | 5.286694 | 4.402155 | 0.005636 | 0.132626 | -1.87451 |
| MSTRG.18274.1     | -1.19053 | 2.422994 | -4.40044 | 0.005646 | 0.132678 | -1.87632 |
| NONHSAT201028.1   | 1.267219 | 1.691284 | 4.39976  | 0.00565  | 0.132678 | -1.87703 |
| NONHSAT196765.1   | -1.09874 | 1.977965 | -4.39941 | 0.005652 | 0.132678 | -1.8774  |
| ENST00000521572.1 | 1.150561 | 2.489362 | 4.398702 | 0.005656 | 0.132685 | -1.87815 |
| lnc-SLC7A3-4:1    | -1.3837  | 4.250001 | -4.3976  | 0.005662 | 0.132765 | -1.87931 |
| NONHSAT174534.1   | -1.86448 | 1.924292 | -4.39741 | 0.005663 | 0.132765 | -1.87951 |
| ENST00000456031.1 | -1.51083 | 2.289877 | -4.39573 | 0.005673 | 0.132905 | -1.88128 |
| T183635           | -1.55907 | 2.59503  | -4.39355 | 0.005685 | 0.133092 | -1.88357 |
| lnc-CCDC171-7:1   | 1.51924  | 2.022377 | 4.393352 | 0.005686 | 0.133092 | -1.88378 |
| NONHSAT191854.1   | 1.587388 | 2.262223 | 4.391811 | 0.005695 | 0.133144 | -1.88541 |
| NONHSAT205357.1   | 1.264095 | 3.274459 | 4.391339 | 0.005698 | 0.133163 | -1.8859  |
| NONHSAT196754.1   | 1.691639 | 2.367794 | 4.390985 | 0.0057   | 0.133163 | -1.88628 |
| lnc-ARF6-8:1      | 1.028492 | 3.515228 | 4.389567 | 0.005708 | 0.133207 | -1.88777 |
| NONHSAT177060.1   | -1.34993 | 2.792546 | -4.38953 | 0.005708 | 0.133207 | -1.88781 |
| NONHSAT214301.1   | -1.17617 | 5.509047 | -4.38903 | 0.005711 | 0.13324  | -1.88834 |
| NONHSAT221962.1   | -1.07391 | 3.821684 | -4.38825 | 0.005716 | 0.133283 | -1.88916 |
| MSTRG.54393.1     | -1.03353 | 3.484866 | -4.38491 | 0.005735 | 0.133423 | -1.89269 |
| lnc-RBBP6-4:4     | 1.13235  | 4.035058 | 4.383793 | 0.005741 | 0.133423 | -1.89386 |

|                   |          |          |          |          |          |          |
|-------------------|----------|----------|----------|----------|----------|----------|
| T047815           | -1.15537 | 2.016114 | -4.38332 | 0.005744 | 0.133423 | -1.89436 |
| MSTRG.18373.1     | 1.33551  | 2.394534 | 4.383153 | 0.005745 | 0.133423 | -1.89454 |
| NONHSAT173615.1   | -1.28432 | 3.534785 | -4.38298 | 0.005746 | 0.133423 | -1.89471 |
| ENST00000659759.1 | -2.03201 | 2.411207 | -4.38268 | 0.005748 | 0.133423 | -1.89503 |
| NONHSAT196209.1   | -1.5935  | 2.463917 | -4.38043 | 0.005761 | 0.133524 | -1.89741 |
| MSTRG.38746.2     | -1.47114 | 2.040109 | -4.37966 | 0.005765 | 0.133524 | -1.89822 |
| lnc-CHRNA5-3:3    | 1.167592 | 1.899548 | 4.379054 | 0.005769 | 0.133524 | -1.89886 |
| lnc-EVX2-4:2      | 1.072633 | 3.591688 | 4.377933 | 0.005775 | 0.133524 | -1.90005 |
| NONHSAT205359.1   | -1.67263 | 3.830549 | -4.375   | 0.005793 | 0.133686 | -1.90315 |
| NR_110156         | -1.16244 | 2.245189 | -4.37291 | 0.005805 | 0.133846 | -1.90535 |
| NONHSAT195823.1   | 1.48784  | 2.145305 | 4.371126 | 0.005815 | 0.133935 | -1.90724 |
| lnc-DIAPH3-12:1   | -1.11992 | 8.346002 | -4.36782 | 0.005835 | 0.134053 | -1.91074 |
| NONHSAT198648.1   | -1.48735 | 4.171234 | -4.36777 | 0.005835 | 0.134053 | -1.91079 |
| lnc-EEA1-6:1      | 1.327451 | 3.531279 | 4.367417 | 0.005837 | 0.134054 | -1.91116 |
| lnc-SEC61G-9:1    | 1.165145 | 1.641694 | 4.365691 | 0.005847 | 0.134054 | -1.91299 |
| NONHSAT160182.1   | 1.087421 | 3.098012 | 4.361685 | 0.005871 | 0.134304 | -1.91723 |
| ENST00000661878.1 | 1.362557 | 2.345623 | 4.361651 | 0.005871 | 0.134304 | -1.91726 |
| NONHSAT164786.1   | 1.178783 | 1.969541 | 4.360403 | 0.005879 | 0.134313 | -1.91859 |
| NONHSAT161669.1   | 1.023844 | 2.149934 | 4.359868 | 0.005882 | 0.134313 | -1.91915 |
| ENST00000670381.1 | -1.49383 | 2.81597  | -4.35983 | 0.005882 | 0.134313 | -1.91919 |
| lnc-BTK-1:1       | -1.55601 | 4.972267 | -4.35816 | 0.005892 | 0.134313 | -1.92096 |
| lnc-CLEC4M-3:1    | -1.31388 | 5.401292 | -4.35763 | 0.005895 | 0.134313 | -1.92152 |
| lnc-VRK1-10:3     | 1.171649 | 1.664279 | 4.357267 | 0.005897 | 0.134313 | -1.92191 |
| MSTRG.47511.1     | -1.60236 | 2.193122 | -4.35691 | 0.0059   | 0.134313 | -1.92229 |
| NONHSAT213854.1   | 1.259511 | 4.120228 | 4.356398 | 0.005903 | 0.134313 | -1.92283 |
| MSTRG.36348.1     | 1.11651  | 1.728198 | 4.355804 | 0.005906 | 0.134313 | -1.92346 |
| lnc-KCNB2-9:1     | -1.6731  | 3.415249 | -4.35468 | 0.005913 | 0.134313 | -1.92465 |
| lnc-CDH13-3:1     | -1.0831  | 5.466379 | -4.3536  | 0.005919 | 0.134395 | -1.9258  |
| NONHSAT224265.1   | -1.11568 | 4.157873 | -4.35251 | 0.005926 | 0.134455 | -1.92695 |
| lnc-TTLL4-2:1     | 1.318833 | 2.197774 | 4.351009 | 0.005935 | 0.134599 | -1.92854 |
| lnc-DDX60-2:1     | -1.5234  | 2.661576 | -4.35051 | 0.005938 | 0.134604 | -1.92907 |
| lnc-CA2-2:1       | -1.3277  | 8.036047 | -4.34944 | 0.005944 | 0.134604 | -1.9302  |
| ENST00000615570.1 | -1.20387 | 3.728256 | -4.34612 | 0.005964 | 0.134753 | -1.93373 |
| ENST00000506068.1 | -1.10161 | 3.114467 | -4.34484 | 0.005972 | 0.134855 | -1.93509 |
| lnc-PIK3R1-10:1   | 1.136145 | 3.38891  | 4.34471  | 0.005973 | 0.134855 | -1.93523 |
| MSTRG.46731.1     | 1.026115 | 3.554577 | 4.34377  | 0.005979 | 0.134893 | -1.93622 |
| lnc-SHISA5-3:1    | 1.641407 | 2.559435 | 4.343422 | 0.005981 | 0.134911 | -1.93659 |
| NONHSAT186627.1   | 1.474544 | 2.151226 | 4.342587 | 0.005986 | 0.134972 | -1.93748 |
| ENST00000668689.1 | -1.71769 | 3.082343 | -4.34216 | 0.005988 | 0.134972 | -1.93793 |
| ENST00000661265.1 | -1.16428 | 1.817652 | -4.3415  | 0.005992 | 0.134972 | -1.93863 |
| lnc-FBXO21-1:1    | -1.37297 | 8.353805 | -4.34108 | 0.005995 | 0.134972 | -1.93908 |
| NONHSAT186613.1   | -1.32823 | 1.976465 | -4.34099 | 0.005996 | 0.134972 | -1.93917 |
| NONHSAT154864.1   | -1.63539 | 2.677161 | -4.34097 | 0.005996 | 0.134972 | -1.93919 |
| NONHSAT197136.1   | -1.52199 | 2.488746 | -4.3398  | 0.006003 | 0.135075 | -1.94044 |
| MSTRG.53344.1     | 1.324107 | 3.427324 | 4.339332 | 0.006006 | 0.135109 | -1.94094 |
| NONHSAT210132.1   | -1.2226  | 3.161941 | -4.33908 | 0.006007 | 0.135114 | -1.94121 |
| MSTRG.29874.1     | -1.19666 | 2.038033 | -4.33696 | 0.00602  | 0.135124 | -1.94346 |
| lnc-AGAP2-1:4     | 1.585043 | 3.975694 | 4.336178 | 0.006025 | 0.135124 | -1.94429 |

|                   |          |          |          |          |          |          |
|-------------------|----------|----------|----------|----------|----------|----------|
| lnc-LUZP2-5:1     | 1.432469 | 1.808084 | 4.33616  | 0.006025 | 0.135124 | -1.94431 |
| lnc-MBOAT1-15:1   | -1.32069 | 3.643275 | -4.33559 | 0.006029 | 0.135124 | -1.94491 |
| NR_110139         | 1.008806 | 4.247814 | 4.331436 | 0.006054 | 0.135244 | -1.94933 |
| NONHSAT223699.1   | 1.014241 | 2.589248 | 4.329397 | 0.006067 | 0.135393 | -1.9515  |
| MSTRG.54890.1     | 1.016772 | 4.828959 | 4.328809 | 0.00607  | 0.135444 | -1.95213 |
| T270004           | -1.37325 | 2.046455 | -4.32725 | 0.00608  | 0.135489 | -1.95379 |
| ENST00000567305.1 | -2.11678 | 3.984451 | -4.32708 | 0.006081 | 0.135489 | -1.95396 |
| NONHSAT217260.1   | -1.08358 | 3.361014 | -4.32687 | 0.006082 | 0.135489 | -1.95418 |
| NONHSAT193970.1   | -2.30198 | 2.999178 | -4.32617 | 0.006087 | 0.135529 | -1.95494 |
| lnc-PLA1A-1:1     | -1.34278 | 2.16879  | -4.32569 | 0.00609  | 0.13554  | -1.95545 |
| lnc-ADAM17-1:1    | -1.32533 | 4.051992 | -4.3255  | 0.006091 | 0.13554  | -1.95565 |
| NONHSAT201596.1   | -1.52616 | 9.132845 | -4.32291 | 0.006107 | 0.135616 | -1.95841 |
| NONHSAT149371.1   | 1.096037 | 1.661646 | 4.322249 | 0.006111 | 0.135616 | -1.95911 |
| lnc-SIPA1L2-8:1   | 1.813868 | 4.247175 | 4.321577 | 0.006115 | 0.135616 | -1.95983 |
| NONHSAT155892.1   | 1.575985 | 2.287685 | 4.319413 | 0.006129 | 0.135736 | -1.96213 |
| NONHSAT160975.1   | 1.137999 | 4.105395 | 4.319383 | 0.006129 | 0.135736 | -1.96216 |
| lnc-OR2V2-2:1     | 1.409756 | 2.494133 | 4.319108 | 0.00613  | 0.135736 | -1.96246 |
| lnc-LGALS9B-12:1  | -1.03408 | 2.582603 | -4.31711 | 0.006143 | 0.135864 | -1.96459 |
| MSTRG.39322.1     | 1.743604 | 1.919147 | 4.313639 | 0.006165 | 0.136165 | -1.96829 |
| NONHSAT163442.1   | -1.31587 | 2.921852 | -4.31307 | 0.006168 | 0.13617  | -1.9689  |
| ZBED3-AS1:53      | 1.400882 | 4.115029 | 4.312084 | 0.006175 | 0.136175 | -1.96995 |
| ENST00000568730.1 | -1.25947 | 2.187163 | -4.31107 | 0.006181 | 0.13622  | -1.97103 |
| NONHSAT200395.1   | 1.189775 | 3.083518 | 4.310361 | 0.006185 | 0.13622  | -1.97179 |
| NONHSAT198305.1   | 2.377718 | 2.215323 | 4.308473 | 0.006197 | 0.136311 | -1.9738  |
| MSTRG.15357.1     | -1.11182 | 1.708842 | -4.30639 | 0.00621  | 0.136449 | -1.97603 |
| NONHSAT206240.1   | -1.01921 | 3.500674 | -4.30614 | 0.006212 | 0.136449 | -1.97629 |
| NONHSAT219485.1   | -1.12138 | 6.354388 | -4.30572 | 0.006215 | 0.136449 | -1.97675 |
| NONHSAT161592.1   | -1.93899 | 3.808713 | -4.30421 | 0.006224 | 0.136505 | -1.97835 |
| NONHSAT175658.1   | -1.21044 | 1.931713 | -4.29862 | 0.00626  | 0.136857 | -1.98433 |
| NONHSAT159195.1   | 1.716204 | 2.231518 | 4.29829  | 0.006262 | 0.136857 | -1.98468 |
| lnc-RGMB-4:1      | -1.61571 | 2.815673 | -4.29714 | 0.006269 | 0.136857 | -1.98591 |
| lnc-SDHAF4-8:1    | -1.06472 | 10.34121 | -4.29697 | 0.00627  | 0.136857 | -1.9861  |
| NONHSAT204515.1   | 1.046151 | 2.140784 | 4.296445 | 0.006274 | 0.136857 | -1.98666 |
| NONHSAT153990.1   | -1.01669 | 1.646578 | -4.29581 | 0.006278 | 0.136892 | -1.98734 |
| lnc-RNF20-5:1     | -1.43101 | 2.921393 | -4.29563 | 0.006279 | 0.136892 | -1.98753 |
| NONHSAT197499.1   | -1.19236 | 4.962113 | -4.29362 | 0.006292 | 0.136952 | -1.98968 |
| NONHSAT184025.1   | 1.962929 | 2.457914 | 4.292454 | 0.006299 | 0.13704  | -1.99093 |
| NONHSAT201959.1   | 1.525404 | 1.795661 | 4.291589 | 0.006305 | 0.137132 | -1.99185 |
| NONHSAT201004.1   | -1.38434 | 2.358063 | -4.29125 | 0.006307 | 0.13715  | -1.99222 |
| lnc-MPLKIP-5:4    | 1.270838 | 2.953507 | 4.289927 | 0.006316 | 0.137217 | -1.99363 |
| NONHSAT205228.1   | 1.944797 | 7.055808 | 4.286724 | 0.006336 | 0.13743  | -1.99706 |
| lnc-NR3C2-7:2     | 1.454779 | 1.802104 | 4.286297 | 0.006339 | 0.137461 | -1.99752 |
| NONHSAT148328.1   | 1.763306 | 1.982852 | 4.28433  | 0.006352 | 0.137505 | -1.99963 |
| lnc-CNTNAP2-7:1   | 1.609737 | 1.936531 | 4.283465 | 0.006358 | 0.137556 | -2.00055 |
| lnc-FSHB-9:1      | 1.186726 | 3.593284 | 4.283312 | 0.006359 | 0.137556 | -2.00072 |
| lnc-FAM178B-1:1   | -1.36112 | 2.133791 | -4.28297 | 0.006361 | 0.137575 | -2.00108 |
| MSTRG.54670.1     | -1.14149 | 6.630232 | -4.28014 | 0.006379 | 0.137915 | -2.00412 |
| lnc-PKDCC-1:1     | 1.287455 | 2.044293 | 4.279539 | 0.006383 | 0.137948 | -2.00476 |



|                   |          |          |          |          |          |          |
|-------------------|----------|----------|----------|----------|----------|----------|
| lnc-TAS2R1-12:1   | -1.53962 | 3.171872 | -4.27796 | 0.006394 | 0.137948 | -2.00645 |
| NONHSAT212977.1   | 1.526861 | 2.432911 | 4.277213 | 0.006398 | 0.137948 | -2.00726 |
| ENST00000512516.1 | -1.36719 | 2.358179 | -4.27694 | 0.0064   | 0.137948 | -2.00755 |
| NONHSAT153933.1   | -1.59019 | 1.948981 | -4.2766  | 0.006403 | 0.137948 | -2.00792 |
| NONHSAT176310.1   | 1.093135 | 4.333108 | 4.275725 | 0.006408 | 0.138007 | -2.00885 |
| ENST00000667942.1 | 2.337566 | 2.606098 | 4.275175 | 0.006412 | 0.138026 | -2.00944 |
| ENST00000648601.1 | 1.949116 | 3.650122 | 4.272563 | 0.006429 | 0.138219 | -2.01225 |
| ENST00000414377.1 | 1.539974 | 6.086554 | 4.271919 | 0.006433 | 0.138257 | -2.01294 |
| MSTRG.5523.2      | 1.434904 | 2.979321 | 4.270645 | 0.006442 | 0.138314 | -2.01431 |
| MSTRG.17485.6     | -1.17288 | 2.80016  | -4.27006 | 0.006446 | 0.138338 | -2.01494 |
| NONHSAT204618.1   | 1.45431  | 2.385149 | 4.268332 | 0.006457 | 0.138465 | -2.01679 |
| lnc-TARDBP-8:1    | -1.22634 | 7.791071 | -4.26738 | 0.006463 | 0.138529 | -2.01781 |
| T049236           | 1.261246 | 2.225946 | 4.266283 | 0.006471 | 0.138529 | -2.01899 |
| NONHSAT180294.1   | 1.879526 | 2.414752 | 4.265324 | 0.006477 | 0.138529 | -2.02002 |
| MSTRG.3292.1      | 1.003169 | 4.52849  | 4.262578 | 0.006495 | 0.138552 | -2.02297 |
| NR_125817         | 1.509721 | 2.895933 | 4.262055 | 0.006499 | 0.138552 | -2.02354 |
| lnc-TTPA-6:1      | -1.00007 | 7.373822 | -4.2619  | 0.0065   | 0.138552 | -2.0237  |
| lnc-MRPS22-1:13   | -1.51735 | 2.363207 | -4.26183 | 0.0065   | 0.138552 | -2.02378 |
| lnc-SLC25A36-1:1  | -1.02424 | 3.01429  | -4.26023 | 0.006511 | 0.13859  | -2.0255  |
| MSTRG.61221.1     | 2.198332 | 5.1531   | 4.259936 | 0.006513 | 0.138603 | -2.02582 |
| lnc-STX4-2:1      | 1.476519 | 2.032118 | 4.259719 | 0.006514 | 0.138604 | -2.02605 |
| NONHSAT211962.1   | 2.073017 | 2.351429 | 4.258822 | 0.00652  | 0.138637 | -2.02701 |
| NONHSAT182546.1   | 1.576358 | 4.168075 | 4.256141 | 0.006538 | 0.138822 | -2.0299  |
| T163079           | 1.056729 | 2.015209 | 4.25485  | 0.006547 | 0.13886  | -2.03129 |
| lnc-ITGAL-5:1     | -1.69644 | 2.734821 | -4.25484 | 0.006547 | 0.13886  | -2.03129 |
| NONHSAT221794.1   | 1.402373 | 1.816575 | 4.25426  | 0.006551 | 0.138904 | -2.03192 |
| lnc-CD180-7:1     | -1.10425 | 2.477347 | -4.25393 | 0.006553 | 0.138904 | -2.03228 |
| lnc-HIST1H2AI-1:8 | -1.26176 | 4.852437 | -4.25194 | 0.006567 | 0.13903  | -2.03442 |
| lnc-HTR5A-1:1     | -1.281   | 2.124031 | -4.25135 | 0.006571 | 0.13904  | -2.03506 |
| lnc-BLCAP-5:1     | -1.00368 | 5.108508 | -4.25134 | 0.006571 | 0.13904  | -2.03507 |
| lnc-TMEM135-9:1   | 1.46401  | 1.846843 | 4.247902 | 0.006594 | 0.139097 | -2.03877 |
| MSTRG.45968.1     | 1.083634 | 2.945438 | 4.247487 | 0.006597 | 0.139097 | -2.03922 |
| lnc-MFSD9-13:1    | -1.07871 | 1.915808 | -4.24726 | 0.006598 | 0.139097 | -2.03946 |
| ENST00000548779.1 | -1.44561 | 4.97103  | -4.24495 | 0.006614 | 0.139198 | -2.04196 |
| lnc-TTC5-2:2      | -1.08986 | 3.034296 | -4.24468 | 0.006616 | 0.139207 | -2.04225 |
| T284675           | 1.532493 | 2.107891 | 4.244455 | 0.006617 | 0.13921  | -2.04249 |
| NONHSAT190040.1   | -1.28597 | 5.803015 | -4.24392 | 0.006621 | 0.139228 | -2.04306 |
| MSTRG.28871.3     | -1.60129 | 3.274991 | -4.24308 | 0.006627 | 0.139262 | -2.04397 |
| T104965           | 1.391983 | 2.928214 | 4.242601 | 0.00663  | 0.139302 | -2.04449 |
| T360844           | 1.482468 | 2.069937 | 4.240651 | 0.006643 | 0.139509 | -2.04659 |
| lnc-RGS5-2:3      | 1.141619 | 1.674543 | 4.239069 | 0.006654 | 0.139566 | -2.0483  |
| NONHSAT195538.1   | 1.43063  | 3.506912 | 4.238826 | 0.006656 | 0.139566 | -2.04856 |
| lnc-REL-6:3       | -1.18419 | 3.206483 | -4.23832 | 0.006659 | 0.139566 | -2.04911 |
| lnc-RALB-7:1      | -1.27139 | 11.24407 | -4.2376  | 0.006664 | 0.139583 | -2.04988 |
| lnc-CAPS2-4:2     | -1.85227 | 2.84795  | -4.23552 | 0.006678 | 0.13968  | -2.05213 |
| MSTRG.26065.2     | -1.15994 | 2.653573 | -4.23532 | 0.00668  | 0.13968  | -2.05234 |
| ENST00000561538.1 | 1.423089 | 2.060689 | 4.234017 | 0.006689 | 0.139731 | -2.05375 |
| lnc-COL9A2-1:4    | -1.14811 | 1.871072 | -4.23253 | 0.006699 | 0.139827 | -2.05535 |

|                       |          |          |          |          |          |          |
|-----------------------|----------|----------|----------|----------|----------|----------|
| NONHSAT167631.1       | 1.962941 | 3.327458 | 4.229854 | 0.006718 | 0.139995 | -2.05825 |
| lnc-TEX10-4:1         | 1.248788 | 3.182783 | 4.227528 | 0.006734 | 0.140132 | -2.06076 |
| NONHSAT210164.1       | 1.004318 | 1.53089  | 4.225129 | 0.00675  | 0.140247 | -2.06336 |
| T047559               | 1.837094 | 1.988805 | 4.22458  | 0.006754 | 0.140247 | -2.06395 |
| NONHSAT148748.1       | 1.413203 | 2.694635 | 4.224033 | 0.006758 | 0.140269 | -2.06454 |
| NONHSAT152603.1       | 1.452976 | 2.142565 | 4.222868 | 0.006766 | 0.140341 | -2.0658  |
| MSTRG.44930.1         | -1.26223 | 3.125659 | -4.22273 | 0.006767 | 0.140341 | -2.06595 |
| ENST00000668724.1     | 1.57132  | 4.244832 | 4.221275 | 0.006777 | 0.140354 | -2.06753 |
| NONHSAT187427.1       | -1.68872 | 2.626136 | -4.21995 | 0.006787 | 0.140362 | -2.06896 |
| NONHSAT163254.1       | -1.1783  | 4.260642 | -4.21981 | 0.006788 | 0.140362 | -2.06911 |
| MSTRG.60669.1         | -1.16938 | 1.806461 | -4.21816 | 0.006799 | 0.140457 | -2.0709  |
| NONHSAT202146.1       | -1.0224  | 3.367955 | -4.21664 | 0.00681  | 0.140563 | -2.07255 |
| ENST00000654316.1     | 1.636532 | 2.791475 | 4.216213 | 0.006813 | 0.140596 | -2.07301 |
| lnc-LRMDA-14:1        | 1.72525  | 2.347939 | 4.215528 | 0.006818 | 0.140603 | -2.07375 |
| lnc-SPACA3-1:2        | -1.88498 | 3.1081   | -4.21474 | 0.006823 | 0.140603 | -2.0746  |
| NONHSAT190073.1       | -1.75363 | 2.958726 | -4.21463 | 0.006824 | 0.140603 | -2.07472 |
| MSTRG.59562.1         | 1.395644 | 1.8764   | 4.214291 | 0.006826 | 0.140603 | -2.07509 |
| ENST00000607322.1     | -1.09509 | 3.980767 | -4.21266 | 0.006838 | 0.140603 | -2.07685 |
| NONHSAT197730.1       | -1.04069 | 1.774271 | -4.21201 | 0.006843 | 0.140603 | -2.07756 |
| NONHSAT216038.1       | 1.352362 | 1.768557 | 4.211257 | 0.006848 | 0.140603 | -2.07838 |
| NONHSAT202743.1       | -1.58305 | 2.075548 | -4.211   | 0.00685  | 0.140603 | -2.07866 |
| NONHSAT218904.1       | 2.01809  | 4.805467 | 4.210619 | 0.006852 | 0.140606 | -2.07907 |
| lnc-PLPP3-4:1         | -1.20561 | 4.281711 | -4.20822 | 0.006869 | 0.140759 | -2.08167 |
| MSTRG.23145.1         | -1.41158 | 2.486862 | -4.20806 | 0.006871 | 0.140759 | -2.08184 |
| MSTRG.202.2           | -1.52354 | 9.092033 | -4.20734 | 0.006876 | 0.140764 | -2.08263 |
| T187106               | -1.08759 | 3.646505 | -4.20716 | 0.006877 | 0.140764 | -2.08282 |
| lnc-STON1-GTF2A1L-2:1 | -1.20674 | 2.577724 | -4.20343 | 0.006904 | 0.141081 | -2.08686 |
| NONHSAT210315.1       | 1.009141 | 1.580968 | 4.20258  | 0.00691  | 0.141148 | -2.08779 |
| ENST00000653118.1     | 1.110104 | 5.567122 | 4.200245 | 0.006926 | 0.141289 | -2.09032 |
| MSTRG.37935.1         | 1.418252 | 4.070616 | 4.199656 | 0.006931 | 0.141318 | -2.09096 |
| MSTRG.36086.1         | -1.03991 | 4.121084 | -4.1977  | 0.006945 | 0.14152  | -2.09309 |
| NONHSAT179711.1       | 1.009221 | 1.627955 | 4.197486 | 0.006946 | 0.141522 | -2.09332 |
| ENST00000439299.1     | -1.20109 | 2.003793 | -4.1956  | 0.00696  | 0.141709 | -2.09537 |
| NONHSAT154949.1       | 1.535063 | 2.946382 | 4.195054 | 0.006964 | 0.141709 | -2.09596 |
| lnc-ANXA2R-6:1        | 2.075301 | 4.849982 | 4.193672 | 0.006974 | 0.141709 | -2.09746 |
| lnc-FRG2C-6:1         | -1.10833 | 2.670306 | -4.19338 | 0.006976 | 0.141709 | -2.09777 |
| ENST00000414790.6     | 1.233394 | 6.418453 | 4.192943 | 0.006979 | 0.141732 | -2.09825 |
| ENST00000426275.1     | -1.43229 | 2.464331 | -4.18715 | 0.007021 | 0.142156 | -2.10455 |
| lnc-FAT3-6:1          | -1.32904 | 2.905226 | -4.18605 | 0.007029 | 0.142226 | -2.10574 |
| MSTRG.46298.2         | -1.07018 | 5.451954 | -4.18549 | 0.007033 | 0.142226 | -2.10636 |
| NONHSAT169947.1       | -1.28817 | 2.906233 | -4.18522 | 0.007035 | 0.142226 | -2.10665 |
| T103396               | 1.367379 | 1.963513 | 4.185128 | 0.007036 | 0.142226 | -2.10675 |
| MSTRG.45766.1         | 1.655994 | 2.762885 | 4.184319 | 0.007042 | 0.142274 | -2.10763 |
| lnc-PRKX-7:1          | -1.09862 | 1.904082 | -4.18281 | 0.007053 | 0.142379 | -2.10927 |
| lnc-P2RY2-11:1        | -1.50057 | 4.948472 | -4.18274 | 0.007053 | 0.142379 | -2.10934 |
| NONHSAT171316.1       | 1.346697 | 3.157021 | 4.177605 | 0.007091 | 0.142511 | -2.11494 |
| lnc-MC3R-2:1          | 1.145759 | 3.278347 | 4.176266 | 0.007101 | 0.142541 | -2.1164  |

|                   |          |          |          |          |          |          |
|-------------------|----------|----------|----------|----------|----------|----------|
| ENST00000670510.1 | 1.89442  | 2.437181 | 4.175341 | 0.007108 | 0.142621 | -2.11741 |
| ENST00000595059.1 | -1.07621 | 2.058494 | -4.17469 | 0.007113 | 0.142662 | -2.11812 |
| MSTRG.58082.1     | -1.21239 | 4.243423 | -4.17436 | 0.007115 | 0.142682 | -2.11848 |
| NONHSAT153655.1   | 1.144047 | 1.873476 | 4.174147 | 0.007116 | 0.142685 | -2.11871 |
| lnc-ODF1-4:1      | -1.14711 | 5.764951 | -4.17236 | 0.00713  | 0.142735 | -2.12066 |
| NONHSAT154567.1   | 1.266581 | 2.021437 | 4.172299 | 0.00713  | 0.142735 | -2.12072 |
| lnc-TRMT13-2:1    | -1.67576 | 2.852751 | -4.17228 | 0.00713  | 0.142735 | -2.12074 |
| lnc-FBXO45-1:1    | -1.55034 | 6.121621 | -4.17115 | 0.007139 | 0.142786 | -2.12197 |
| NONHSAT171875.1   | 2.25326  | 3.285918 | 4.170549 | 0.007143 | 0.142786 | -2.12263 |
| NONHSAT209022.1   | -1.00006 | 4.251147 | -4.17019 | 0.007146 | 0.142786 | -2.12302 |
| ENST00000662862.1 | -1.07509 | 3.517642 | -4.17014 | 0.007146 | 0.142786 | -2.12308 |
| NONHSAT171291.1   | 1.135244 | 1.654484 | 4.166547 | 0.007173 | 0.143134 | -2.127   |
| ENST00000423838.1 | 1.505744 | 2.766615 | 4.165368 | 0.007182 | 0.143207 | -2.12828 |
| NONHSAT161597.1   | 1.277464 | 2.539125 | 4.164261 | 0.00719  | 0.143277 | -2.12949 |
| MSTRG.19480.1     | -1.30665 | 3.791249 | -4.16403 | 0.007192 | 0.143277 | -2.12974 |
| lnc-DNAJC6-3:1    | 1.321498 | 4.355149 | 4.160583 | 0.007218 | 0.143459 | -2.13351 |
| NONHSAT189670.1   | -1.13973 | 3.185071 | -4.15997 | 0.007222 | 0.143472 | -2.13418 |
| lnc-DRD5-29:8     | 1.081426 | 2.038028 | 4.159561 | 0.007225 | 0.143472 | -2.13462 |
| MSTRG.7814.1      | 1.43921  | 1.820479 | 4.159542 | 0.007225 | 0.143472 | -2.13465 |
| lnc-MFSD8-9:1     | 2.085244 | 2.337278 | 4.158801 | 0.007231 | 0.143498 | -2.13545 |
| NONHSAT164920.1   | -1.52548 | 2.615908 | -4.15849 | 0.007233 | 0.143516 | -2.1358  |
| NONHSAT212969.1   | 1.502165 | 1.77617  | 4.157984 | 0.007237 | 0.143535 | -2.13635 |
| MSTRG.42808.1     | -1.04991 | 3.262092 | -4.15615 | 0.007251 | 0.143664 | -2.13836 |
| MSTRG.69484.1     | -2.19383 | 2.663725 | -4.15604 | 0.007252 | 0.143664 | -2.13847 |
| MSTRG.43113.1     | 2.305336 | 2.976898 | 4.155063 | 0.007259 | 0.143664 | -2.13954 |
| NONHSAT198001.1   | 1.747447 | 4.724914 | 4.153555 | 0.007271 | 0.143755 | -2.14119 |
| lnc-BCL7A-3:1     | 1.470309 | 5.217086 | 4.153501 | 0.007271 | 0.143755 | -2.14125 |
| lnc-NDST3-10:1    | -1.52772 | 2.077232 | -4.15242 | 0.007279 | 0.143832 | -2.14242 |
| NONHSAT218255.1   | -1.19994 | 2.038123 | -4.15183 | 0.007284 | 0.143868 | -2.14308 |
| lnc-CPT1A-3:1     | 1.832077 | 3.826238 | 4.1489   | 0.007306 | 0.143967 | -2.14628 |
| MSTRG.61317.1     | 1.057779 | 1.553354 | 4.148608 | 0.007308 | 0.143983 | -2.1466  |
| ENST00000504874.1 | -1.31324 | 2.482806 | -4.14753 | 0.007317 | 0.144004 | -2.14778 |
| MSTRG.37964.1     | 1.486282 | 4.765693 | 4.146301 | 0.007326 | 0.144011 | -2.14912 |
| MSTRG.21378.2     | 1.502777 | 2.347397 | 4.143354 | 0.007348 | 0.144267 | -2.15235 |
| NONHSAT164410.1   | -1.04236 | 1.674707 | -4.1416  | 0.007362 | 0.144335 | -2.15428 |
| NONHSAT172127.1   | 1.458802 | 1.885006 | 4.14014  | 0.007373 | 0.144428 | -2.15587 |
| lnc-FGF10-4:1     | 1.152879 | 2.412392 | 4.14005  | 0.007374 | 0.144428 | -2.15597 |
| ENST00000609581.1 | -1.0345  | 9.790566 | -4.13848 | 0.007386 | 0.144496 | -2.15769 |
| NONHSAT164819.1   | 1.318393 | 1.942979 | 4.134498 | 0.007417 | 0.144699 | -2.16205 |
| NONHSAT212095.1   | 2.113678 | 2.303769 | 4.133887 | 0.007422 | 0.144718 | -2.16273 |
| NONHSAT200324.1   | 1.248611 | 7.025876 | 4.132932 | 0.007429 | 0.144751 | -2.16377 |
| ENST00000569778.1 | 1.413832 | 3.573185 | 4.132637 | 0.007431 | 0.144751 | -2.1641  |
| lnc-CDY1-19:1     | 1.271409 | 1.738712 | 4.132351 | 0.007433 | 0.144751 | -2.16441 |
| lnc-NSMCE4A-2:1   | -1.02464 | 9.061708 | -4.13004 | 0.007451 | 0.14492  | -2.16694 |
| ENST00000537346.1 | 1.046284 | 3.572849 | 4.13003  | 0.007452 | 0.14492  | -2.16696 |
| NONHSAT187835.1   | 1.733328 | 4.128408 | 4.129842 | 0.007453 | 0.14492  | -2.16716 |
| NONHSAT206025.1   | -1.46056 | 1.909707 | -4.12959 | 0.007455 | 0.14492  | -2.16744 |
| lnc-CACYBP-3:1    | -1.30775 | 2.337181 | -4.12897 | 0.00746  | 0.144956 | -2.16811 |

|                   |          |          |          |          |          |          |
|-------------------|----------|----------|----------|----------|----------|----------|
| MSTRG.65491.2     | -1.17846 | 2.260814 | -4.12804 | 0.007467 | 0.145017 | -2.16915 |
| ENST00000574471.1 | -1.13728 | 3.955385 | -4.12488 | 0.007492 | 0.145135 | -2.17261 |
| MSTRG.12265.1     | 1.385816 | 2.128166 | 4.124483 | 0.007495 | 0.145135 | -2.17305 |
| lnc-PAQR9-7:1     | -1.45495 | 4.636059 | -4.12304 | 0.007506 | 0.14519  | -2.17463 |
| NONHSAT222629.1   | 1.687346 | 2.642021 | 4.121612 | 0.007517 | 0.145293 | -2.1762  |
| NONHSAT171343.1   | -1.38839 | 2.839716 | -4.1181  | 0.007545 | 0.14554  | -2.18006 |
| lnc-OR6B1-1:1     | 1.97299  | 2.845341 | 4.116005 | 0.007562 | 0.145674 | -2.18236 |
| NONHSAT159043.1   | -1.16621 | 6.184128 | -4.1157  | 0.007564 | 0.145687 | -2.18269 |
| NONHSAT219425.1   | 1.132337 | 1.827007 | 4.114973 | 0.00757  | 0.145693 | -2.1835  |
| NONHSAT185890.1   | -1.62174 | 5.403617 | -4.10976 | 0.007611 | 0.145943 | -2.18923 |
| NONHSAT180797.1   | 1.0948   | 1.651226 | 4.109504 | 0.007613 | 0.145943 | -2.18951 |
| ENST00000457975.2 | 1.184587 | 1.64115  | 4.109478 | 0.007614 | 0.145943 | -2.18954 |
| lnc-GTDC1-21:1    | -1.03291 | 4.417669 | -4.10754 | 0.007629 | 0.146093 | -2.19168 |
| NONHSAT219711.1   | 1.197004 | 3.899484 | 4.107458 | 0.00763  | 0.146093 | -2.19177 |
| ENST00000655237.1 | -1.14635 | 2.844274 | -4.10114 | 0.007681 | 0.146591 | -2.19873 |
| ENST00000428646.1 | 1.081101 | 6.977787 | 4.09725  | 0.007712 | 0.146744 | -2.20302 |
| lnc-NTSR1-1:2     | -1.28935 | 3.624061 | -4.09712 | 0.007713 | 0.146744 | -2.20316 |
| T157393           | 1.714965 | 2.840146 | 4.097029 | 0.007714 | 0.146744 | -2.20326 |
| NONHSAT200032.1   | -1.49236 | 2.028036 | -4.09679 | 0.007716 | 0.146744 | -2.20352 |
| NONHSAT167071.1   | -1.5115  | 2.090477 | -4.09599 | 0.007722 | 0.146744 | -2.2044  |
| NONHSAT209003.1   | 1.753307 | 2.276355 | 4.095046 | 0.00773  | 0.146821 | -2.20545 |
| lnc-BOLA3-5:2     | 1.308731 | 2.202485 | 4.09482  | 0.007732 | 0.146821 | -2.2057  |
| ENST00000578977.1 | -1.18023 | 1.808682 | -4.0938  | 0.00774  | 0.146865 | -2.20682 |
| lnc-STRADB-2:1    | -1.22096 | 2.251599 | -4.0926  | 0.00775  | 0.146912 | -2.20814 |
| NONHSAT197432.1   | 1.247057 | 1.740917 | 4.089385 | 0.007776 | 0.14694  | -2.2117  |
| NONHSAT177961.1   | 1.10519  | 1.584859 | 4.088205 | 0.007786 | 0.147068 | -2.213   |
| NONHSAT163085.1   | 1.628938 | 2.375666 | 4.08797  | 0.007788 | 0.147072 | -2.21326 |
| lnc-ALCAM-8:7     | 1.604166 | 5.501169 | 4.083932 | 0.007821 | 0.147324 | -2.21772 |
| NONHSAT220969.1   | -1.06846 | 4.156682 | -4.08205 | 0.007836 | 0.147443 | -2.21979 |
| lnc-ELP3-1:1      | -1.11329 | 4.016344 | -4.0809  | 0.007846 | 0.147512 | -2.22107 |
| NONHSAT224258.1   | -1.30044 | 3.647344 | -4.08007 | 0.007853 | 0.147532 | -2.22199 |
| ENST00000566747.1 | 1.198907 | 4.609321 | 4.076463 | 0.007883 | 0.147741 | -2.22598 |
| NONHSAT206246.1   | -1.09594 | 1.767006 | -4.07446 | 0.007899 | 0.147907 | -2.22819 |
| lnc-AKR1C2-10:1   | -1.01639 | 5.281159 | -4.0744  | 0.0079   | 0.147907 | -2.22826 |
| lnc-NDST4-1:1     | -1.6906  | 2.416405 | -4.0737  | 0.007906 | 0.147918 | -2.22903 |
| NONHSAT195170.1   | 1.512668 | 3.682856 | 4.072951 | 0.007912 | 0.14796  | -2.22986 |
| lnc-HELQ-1:1      | -1.83427 | 3.733135 | -4.07273 | 0.007914 | 0.14796  | -2.2301  |
| ENST00000658561.1 | 1.037768 | 1.538718 | 4.068898 | 0.007946 | 0.148346 | -2.23435 |
| NONHSAT157123.1   | -1.3817  | 3.414475 | -4.06621 | 0.007968 | 0.148368 | -2.23732 |
| T080141           | -1.22094 | 3.956803 | -4.06582 | 0.007972 | 0.148368 | -2.23776 |
| lnc-SLC20A1-3:1   | -1.05698 | 2.016048 | -4.06568 | 0.007973 | 0.148368 | -2.23792 |
| lnc-RINT1-4:1     | 1.22295  | 3.943493 | 4.065005 | 0.007979 | 0.148368 | -2.23866 |
| lnc-THBD-1:5      | -1.01654 | 3.77518  | -4.06442 | 0.007983 | 0.148368 | -2.23931 |
| NONHSAT223999.1   | 1.691232 | 3.225536 | 4.064145 | 0.007986 | 0.148368 | -2.23962 |
| lnc-OGT-9:1       | 1.217137 | 3.02465  | 4.063643 | 0.00799  | 0.148368 | -2.24017 |
| T127833           | -1.076   | 1.655858 | -4.06341 | 0.007992 | 0.148368 | -2.24043 |
| ENST00000508815.1 | -1.5284  | 4.115972 | -4.06329 | 0.007993 | 0.148368 | -2.24056 |
| ENST00000451697.1 | 1.548964 | 3.13967  | 4.06298  | 0.007996 | 0.148368 | -2.24091 |

|                    |          |          |          |          |          |          |
|--------------------|----------|----------|----------|----------|----------|----------|
| ENST00000419190.2  | 1.311832 | 3.188634 | 4.062785 | 0.007997 | 0.148368 | -2.24112 |
| lnc-MPPE1-1:6      | -1.18617 | 5.021481 | -4.06248 | 0.008    | 0.148368 | -2.24146 |
| NONHSAT162508.1    | 1.273793 | 5.03706  | 4.062127 | 0.008003 | 0.148387 | -2.24185 |
| T063599            | -1.10297 | 4.149517 | -4.06124 | 0.00801  | 0.148459 | -2.24284 |
| ENST00000442072.1  | 1.021165 | 3.966899 | 4.061149 | 0.008011 | 0.148459 | -2.24294 |
| NR_125920          | 1.398388 | 5.305905 | 4.060398 | 0.008017 | 0.148471 | -2.24377 |
| lnc-TRIM38-6:1     | -1.26289 | 2.522142 | -4.0599  | 0.008022 | 0.148479 | -2.24432 |
| MSTRG.5858.1       | -1.12489 | 4.130036 | -4.05871 | 0.008032 | 0.148524 | -2.24565 |
| NONHSAT178389.1    | 1.300594 | 1.794533 | 4.058245 | 0.008036 | 0.14856  | -2.24616 |
| NONHSAT202409.1    | 1.226512 | 3.289815 | 4.057571 | 0.008041 | 0.148613 | -2.24691 |
| ENST00000443018.2  | 1.160058 | 1.968314 | 4.052907 | 0.008081 | 0.148849 | -2.25208 |
| MSTRG.62784.1      | -1.87438 | 2.784357 | -4.05092 | 0.008098 | 0.148954 | -2.25429 |
| MSTRG.1287.1       | -1.45489 | 2.589965 | -4.05044 | 0.008102 | 0.148954 | -2.25482 |
| lnc-C9orf50-1:2    | 2.086806 | 3.106692 | 4.050141 | 0.008105 | 0.148954 | -2.25515 |
| ENST00000665400.1  | -1.19605 | 4.9828   | -4.04992 | 0.008107 | 0.148954 | -2.2554  |
| MSTRG.42584.1      | 1.513561 | 1.999785 | 4.049828 | 0.008108 | 0.148954 | -2.2555  |
| lnc-MAP10-1:1      | 1.976392 | 2.904531 | 4.049346 | 0.008112 | 0.148954 | -2.25604 |
| lnc-ARMCX1-1:4     | 1.029218 | 4.513344 | 4.048886 | 0.008116 | 0.148999 | -2.25655 |
| NONHSAT218072.1    | -1.01184 | 1.896317 | -4.04674 | 0.008134 | 0.14917  | -2.25893 |
| lnc-RTN2-2:1       | 1.014948 | 3.041539 | 4.046091 | 0.00814  | 0.14917  | -2.25965 |
| MSTRG.46411.2      | 1.307797 | 1.812276 | 4.045659 | 0.008143 | 0.149182 | -2.26013 |
| lnc-IRX3-80:23     | -1.35799 | 7.93427  | -4.04194 | 0.008176 | 0.149393 | -2.26427 |
| ENST00000427471.1  | -1.264   | 2.452527 | -4.04006 | 0.008192 | 0.149393 | -2.26636 |
| lnc-DTL-2:7        | 1.377204 | 1.873016 | 4.039779 | 0.008194 | 0.149393 | -2.26667 |
| ENST00000439207.1  | -1.27745 | 6.074744 | -4.03911 | 0.0082   | 0.149393 | -2.26741 |
| lnc-HNRNPA2B1-16:5 | -1.42643 | 2.84122  | -4.03899 | 0.008201 | 0.149393 | -2.26755 |
| NONHSAT221735.1    | 2.01676  | 2.664347 | 4.037978 | 0.00821  | 0.149437 | -2.26868 |
| NONHSAT205559.1    | -1.70701 | 2.527081 | -4.0379  | 0.008211 | 0.149437 | -2.26876 |
| NONHSAT197283.1    | -1.53443 | 2.455795 | -4.03481 | 0.008238 | 0.149496 | -2.27221 |
| lnc-CHIC1-9:1      | 1.659198 | 2.91855  | 4.03449  | 0.00824  | 0.149496 | -2.27256 |
| lnc-SCP2D1-3:1     | -2.05538 | 2.617216 | -4.0343  | 0.008242 | 0.149496 | -2.27277 |
| lnc-LSM3-4:1       | 1.5124   | 2.966097 | 4.03356  | 0.008248 | 0.149559 | -2.27359 |
| lnc-CWC27-7:1      | 1.360196 | 2.445891 | 4.032043 | 0.008262 | 0.149719 | -2.27528 |
| NONHSAT201540.1    | 1.139708 | 5.118718 | 4.0318   | 0.008264 | 0.149731 | -2.27555 |
| NONHSAT180789.1    | 1.327045 | 2.085549 | 4.030674 | 0.008274 | 0.149775 | -2.27681 |
| NONHSAT195388.1    | 1.166083 | 3.794516 | 4.029745 | 0.008282 | 0.149796 | -2.27784 |
| NONHSAT223918.1    | -1.24966 | 3.260903 | -4.02946 | 0.008284 | 0.149796 | -2.27816 |
| lnc-CALB2-1:3      | -1.67553 | 2.477367 | -4.02825 | 0.008295 | 0.149796 | -2.27951 |
| MSTRG.42772.3      | -1.65669 | 2.8209   | -4.02752 | 0.008301 | 0.149835 | -2.28032 |
| NONHSAT197039.1    | -1.41553 | 2.353622 | -4.02705 | 0.008306 | 0.149835 | -2.28085 |
| NONHSAT170342.1    | -1.54128 | 2.168561 | -4.02625 | 0.008313 | 0.149835 | -2.28174 |
| NONHSAT189955.1    | 2.098666 | 2.693077 | 4.02578  | 0.008317 | 0.149883 | -2.28226 |
| ENST00000666543.1  | -1.83879 | 2.072961 | -4.02355 | 0.008337 | 0.150103 | -2.28474 |
| NONHSAT192777.1    | 1.373273 | 1.905385 | 4.023187 | 0.00834  | 0.150135 | -2.28515 |
| NONHSAT181208.1    | 1.555146 | 1.88525  | 4.022929 | 0.008342 | 0.150149 | -2.28544 |
| NONHSAT154399.1    | -1.22822 | 12.41958 | -4.0209  | 0.00836  | 0.150339 | -2.2877  |
| MSTRG.43901.1      | -1.01436 | 1.617814 | -4.01915 | 0.008376 | 0.150403 | -2.28965 |
| lnc-NAA35-9:1      | 1.887553 | 2.649925 | 4.018659 | 0.00838  | 0.150429 | -2.2902  |

|                   |          |          |          |          |          |          |
|-------------------|----------|----------|----------|----------|----------|----------|
| MSTRG.49698.1     | 1.230527 | 2.311535 | 4.017153 | 0.008393 | 0.150536 | -2.29188 |
| lnc-HLX-2:1       | -1.03167 | 8.063066 | -4.01673 | 0.008397 | 0.150574 | -2.29236 |
| ENST00000660399.1 | -1.09907 | 3.408883 | -4.01616 | 0.008402 | 0.150616 | -2.293   |
| ENST00000546770.1 | 1.857    | 4.535884 | 4.014927 | 0.008413 | 0.15065  | -2.29437 |
| NONHSAT204047.1   | 1.362929 | 2.765824 | 4.013699 | 0.008424 | 0.15076  | -2.29574 |
| lnc-CXCL12-5:1    | -1.39171 | 3.526734 | -4.01326 | 0.008428 | 0.15076  | -2.29623 |
| lnc-ETS2-11:1     | -1.09186 | 5.659194 | -4.00986 | 0.008459 | 0.151016 | -2.30003 |
| MSTRG.48174.1     | 1.033832 | 4.256608 | 4.008799 | 0.008468 | 0.1511   | -2.30121 |
| NONHSAT215265.1   | -1.60391 | 4.333242 | -4.00714 | 0.008483 | 0.151134 | -2.30307 |
| ENST00000670258.1 | 1.164194 | 2.174089 | 4.00509  | 0.008502 | 0.151151 | -2.30536 |
| T314050           | 1.344213 | 2.607261 | 4.004354 | 0.008508 | 0.151228 | -2.30619 |
| lnc-GOT1-1:1      | -1.09118 | 3.61128  | -4.0024  | 0.008526 | 0.151317 | -2.30837 |
| lnc-SIX4-2:1      | 1.023046 | 3.579857 | 4.001826 | 0.008531 | 0.151317 | -2.30901 |
| lnc-UBAC2-5:1     | -1.65614 | 4.574726 | -3.99982 | 0.00855  | 0.151577 | -2.31125 |
| NONHSAT163657.1   | -1.22681 | 4.68726  | -3.99777 | 0.008568 | 0.151731 | -2.31355 |
| NONHSAT208702.1   | -1.07296 | 6.440464 | -3.99736 | 0.008572 | 0.151755 | -2.31401 |
| NONHSAT167452.1   | 1.331426 | 2.953906 | 3.993482 | 0.008608 | 0.152052 | -2.31835 |
| NONHSAT160094.1   | -1.07135 | 1.695203 | -3.9931  | 0.008611 | 0.15206  | -2.31878 |
| NONHSAT168638.1   | -1.16759 | 1.695369 | -3.98863 | 0.008652 | 0.152438 | -2.32379 |
| NONHSAT158174.1   | -1.65079 | 4.460992 | -3.98816 | 0.008657 | 0.152438 | -2.32432 |
| lnc-CCT5-8:1      | 1.846289 | 3.245079 | 3.987473 | 0.008663 | 0.1525   | -2.32509 |
| NONHSAT173439.1   | 2.066742 | 2.264817 | 3.987384 | 0.008664 | 0.1525   | -2.32519 |
| lnc-C2orf91-5:1   | 1.043327 | 1.598315 | 3.987284 | 0.008665 | 0.1525   | -2.3253  |
| NONHSAT220051.1   | -1.47665 | 2.150245 | -3.98535 | 0.008683 | 0.152589 | -2.32747 |
| lnc-PLLP-2:1      | -1.03012 | 11.03062 | -3.98527 | 0.008683 | 0.152589 | -2.32756 |
| NONHSAT170414.1   | 1.863219 | 2.446155 | 3.984469 | 0.008691 | 0.152642 | -2.32846 |
| MSTRG.6455.1      | 1.740406 | 2.936687 | 3.984293 | 0.008692 | 0.152642 | -2.32865 |
| MSTRG.23202.1     | 1.003991 | 2.933227 | 3.984032 | 0.008695 | 0.152646 | -2.32895 |
| ENST00000670156.1 | 1.212381 | 3.528174 | 3.98272  | 0.008707 | 0.152754 | -2.33042 |
| NONHSAT208007.1   | -1.09088 | 1.739769 | -3.98148 | 0.008719 | 0.152887 | -2.33181 |
| MSTRG.37623.1     | -1.10843 | 4.61739  | -3.97991 | 0.008733 | 0.152887 | -2.33357 |
| T188397           | -1.1267  | 2.133402 | -3.97919 | 0.00874  | 0.152887 | -2.33438 |
| NONHSAT164534.1   | -1.33224 | 4.262676 | -3.97891 | 0.008743 | 0.152887 | -2.3347  |
| ENST00000575767.1 | -1.04733 | 4.106166 | -3.97819 | 0.008749 | 0.152895 | -2.3355  |
| ENST00000524085.2 | -1.1358  | 1.883463 | -3.97761 | 0.008755 | 0.152963 | -2.33615 |
| ENST00000488190.1 | 1.692095 | 2.318334 | 3.975907 | 0.008771 | 0.153109 | -2.33807 |
| ENST00000479822.2 | 1.458502 | 3.456537 | 3.974588 | 0.008783 | 0.15317  | -2.33955 |
| NONHSAT178297.1   | -1.0254  | 1.760109 | -3.97095 | 0.008817 | 0.153525 | -2.34364 |
| T244137           | 1.697366 | 2.669738 | 3.970451 | 0.008822 | 0.153547 | -2.3442  |
| NONHSAT224236.1   | 1.173189 | 2.35979  | 3.970007 | 0.008826 | 0.153547 | -2.3447  |
| lnc-ZNF729-1:1    | -1.08371 | 3.73904  | -3.96794 | 0.008846 | 0.153594 | -2.34702 |
| lnc-UGGT1-8:1     | 1.421769 | 2.945839 | 3.967842 | 0.008847 | 0.153594 | -2.34713 |
| lnc-SEN2-11:1     | -1.01548 | 4.257255 | -3.96779 | 0.008847 | 0.153594 | -2.34719 |
| NONHSAT153470.1   | 1.294119 | 5.185985 | 3.965502 | 0.008869 | 0.153678 | -2.34976 |
| MSTRG.26293.8     | -1.06539 | 2.971488 | -3.96494 | 0.008874 | 0.153678 | -2.35039 |
| ENST00000668682.1 | 1.524635 | 2.479326 | 3.963983 | 0.008883 | 0.153678 | -2.35147 |
| ENST00000668117.1 | 1.673722 | 3.482055 | 3.963173 | 0.008891 | 0.153678 | -2.35238 |
| NONHSAT172187.1   | 1.06794  | 2.428367 | 3.961501 | 0.008907 | 0.153758 | -2.35426 |

|                   |          |          |          |          |          |          |
|-------------------|----------|----------|----------|----------|----------|----------|
| NR_110114         | 1.213996 | 1.946884 | 3.959343 | 0.008928 | 0.153956 | -2.35669 |
| NONHSAT191345.1   | -1.08181 | 2.382397 | -3.95903 | 0.008931 | 0.15398  | -2.35704 |
| NONHSAT161414.1   | 1.101367 | 3.17394  | 3.957368 | 0.008947 | 0.154036 | -2.35892 |
| lnc-OR4C13-7:3    | 1.411661 | 2.398739 | 3.957355 | 0.008947 | 0.154036 | -2.35893 |
| ENST00000568587.1 | -1.44157 | 3.71023  | -3.95694 | 0.008951 | 0.154036 | -2.3594  |
| ENST00000554595.2 | -1.37473 | 2.560582 | -3.95592 | 0.00896  | 0.154039 | -2.36055 |
| lnc-HPRT1-7:2     | 1.124851 | 3.746177 | 3.953778 | 0.008981 | 0.154139 | -2.36296 |
| lnc-STX18-2:1     | 1.107601 | 3.4331   | 3.953272 | 0.008986 | 0.154144 | -2.36353 |
| ENST00000664918.1 | -1.55328 | 3.791643 | -3.95241 | 0.008994 | 0.154208 | -2.3645  |
| ENST00000658970.1 | -1.12645 | 4.85211  | -3.95126 | 0.009005 | 0.15432  | -2.3658  |
| NONHSAT197134.1   | -1.00105 | 6.594207 | -3.94982 | 0.009019 | 0.154466 | -2.36742 |
| NONHSAT218416.1   | 1.460239 | 1.855834 | 3.949747 | 0.00902  | 0.154466 | -2.3675  |
| NONHSAT171468.1   | -1.11091 | 3.852513 | -3.94965 | 0.009021 | 0.154466 | -2.36761 |
| ENST00000644669.1 | -1.02235 | 2.822454 | -3.94886 | 0.009029 | 0.154466 | -2.3685  |
| lnc-GOT2-6:1      | -1.44566 | 5.048729 | -3.94865 | 0.009031 | 0.154466 | -2.36874 |
| lnc-RUNX1T1-8:1   | -1.07136 | 9.79414  | -3.9482  | 0.009035 | 0.154485 | -2.36925 |
| PDZRN3-AS1:8      | 1.325781 | 2.582104 | 3.947863 | 0.009038 | 0.154489 | -2.36963 |
| NONHSAT161842.1   | 1.028754 | 1.843263 | 3.947326 | 0.009043 | 0.154543 | -2.37023 |
| NONHSAT205159.1   | 1.490115 | 2.240128 | 3.945912 | 0.009057 | 0.154543 | -2.37183 |
| NONHSAT158307.1   | 2.092066 | 2.903831 | 3.945153 | 0.009065 | 0.154543 | -2.37269 |
| lnc-CLEC4C-1:1    | 1.45362  | 2.041924 | 3.945131 | 0.009065 | 0.154543 | -2.37271 |
| NONHSAT199491.1   | 1.958236 | 2.385641 | 3.944397 | 0.009072 | 0.154543 | -2.37354 |
| lnc-XRN2-7:1      | 1.196531 | 2.398804 | 3.943778 | 0.009078 | 0.154618 | -2.37424 |
| lnc-RTP4-7:3      | 1.070483 | 4.194909 | 3.942328 | 0.009092 | 0.154702 | -2.37587 |
| NONHSAT211434.1   | 1.506358 | 2.630611 | 3.940902 | 0.009106 | 0.154861 | -2.37748 |
| ENST00000625090.1 | 1.506439 | 3.033125 | 3.938944 | 0.009125 | 0.154906 | -2.37969 |
| MSTRG.26937.1     | 1.365068 | 1.899177 | 3.938763 | 0.009127 | 0.154906 | -2.3799  |
| MSTRG.25126.1     | -1.74359 | 3.669122 | -3.93849 | 0.00913  | 0.154906 | -2.38021 |
| NONHSAT187308.1   | -1.33359 | 5.025584 | -3.93844 | 0.00913  | 0.154906 | -2.38027 |
| lnc-NPR3-2:5      | 2.392694 | 2.552424 | 3.937496 | 0.009139 | 0.15501  | -2.38133 |
| NONHSAT207110.1   | 1.256066 | 1.681147 | 3.937289 | 0.009141 | 0.15501  | -2.38156 |
| NONHSAT219017.1   | -1.11163 | 1.850064 | -3.93497 | 0.009164 | 0.155193 | -2.38418 |
| NONHSAT159456.1   | 1.539947 | 1.856434 | 3.934725 | 0.009167 | 0.155193 | -2.38446 |
| lnc-RAB23-1:5     | 1.037091 | 4.555529 | 3.934068 | 0.009173 | 0.155193 | -2.3852  |
| lnc-FZD1-4:1      | 1.431302 | 5.060232 | 3.933996 | 0.009174 | 0.155193 | -2.38528 |
| T217782           | -1.0634  | 3.428893 | -3.93387 | 0.009175 | 0.155193 | -2.38543 |
| lnc-DRD1-2:1      | -1.36458 | 2.783441 | -3.93341 | 0.00918  | 0.155193 | -2.38594 |
| lnc-AMPD3-3:1     | 1.383329 | 2.95986  | 3.932886 | 0.009185 | 0.155193 | -2.38654 |
| MSTRG.2479.1      | 1.262648 | 2.91068  | 3.93276  | 0.009186 | 0.155193 | -2.38668 |
| ENST00000563464.1 | -1.70553 | 2.292639 | -3.93276 | 0.009186 | 0.155193 | -2.38668 |
| lnc-COL6A5-4:5    | -1.06829 | 3.340166 | -3.93226 | 0.009191 | 0.155193 | -2.38724 |
| lnc-ACTR3B-6:1    | 1.326046 | 3.203694 | 3.93203  | 0.009193 | 0.155193 | -2.38751 |
| NONHSAT185309.1   | -1.14749 | 1.705917 | -3.93185 | 0.009195 | 0.155193 | -2.38772 |
| NR_038385         | 1.289991 | 1.750494 | 3.931722 | 0.009196 | 0.155193 | -2.38785 |
| lnc-ITGB3BP-10:1  | 1.223791 | 1.841813 | 3.931008 | 0.009203 | 0.155286 | -2.38866 |
| lnc-TADA1-2:3     | -1.06751 | 3.136693 | -3.9304  | 0.009209 | 0.15531  | -2.38935 |
| NONHSAT161581.1   | 1.006423 | 3.308005 | 3.929738 | 0.009216 | 0.155382 | -2.3901  |
| NONHSAT210334.1   | 2.338969 | 3.308812 | 3.929393 | 0.009219 | 0.155382 | -2.39049 |

|                   |          |          |          |          |          |          |
|-------------------|----------|----------|----------|----------|----------|----------|
| ENST00000659877.1 | -1.26358 | 3.258703 | -3.92861 | 0.009227 | 0.155428 | -2.39137 |
| NONHSAT189736.1   | -1.2495  | 1.748098 | -3.92794 | 0.009234 | 0.155463 | -2.39213 |
| lnc-DHX37-4:1     | -1.30121 | 6.005454 | -3.92787 | 0.009235 | 0.155463 | -2.39221 |
| NONHSAT169549.1   | -1.21947 | 4.064597 | -3.92707 | 0.009243 | 0.155485 | -2.39312 |
| ENST00000639687.1 | 1.53596  | 2.398213 | 3.925498 | 0.009258 | 0.155492 | -2.39489 |
| lnc-TBP-10:1      | -1.50717 | 2.855282 | -3.92481 | 0.009265 | 0.155534 | -2.39567 |
| MSTRG.64374.1     | -1.49789 | 2.203846 | -3.92464 | 0.009267 | 0.155534 | -2.39586 |
| ENST00000650740.1 | -1.24616 | 2.18675  | -3.9215  | 0.009298 | 0.155789 | -2.39942 |
| NONHSAT197689.1   | 1.394564 | 2.366803 | 3.921133 | 0.009302 | 0.155825 | -2.39983 |
| lnc-IPCEF1-4:1    | -1.13666 | 8.391266 | -3.919   | 0.009323 | 0.156075 | -2.40225 |
| lnc-TFAM-7:1      | 1.183117 | 3.035399 | 3.91817  | 0.009332 | 0.156075 | -2.40319 |
| ENST00000438247.1 | 1.21257  | 1.824383 | 3.917924 | 0.009334 | 0.156075 | -2.40347 |
| NONHSAT184695.1   | -1.10516 | 1.690608 | -3.91717 | 0.009342 | 0.156129 | -2.40432 |
| lnc-SNW1-8:1      | -1.73318 | 3.336588 | -3.91649 | 0.009348 | 0.156159 | -2.40509 |
| lnc-TNS3-4:2      | -1.17368 | 2.035481 | -3.91635 | 0.00935  | 0.156159 | -2.40526 |
| lnc-ADCY8-3:1     | 1.804636 | 3.955502 | 3.916239 | 0.009351 | 0.156159 | -2.40538 |
| NONHSAT169353.1   | 1.193249 | 2.424378 | 3.916061 | 0.009353 | 0.15616  | -2.40558 |
| T232938           | -1.28851 | 4.795225 | -3.9153  | 0.00936  | 0.156198 | -2.40644 |
| T008430           | -1.34291 | 4.144825 | -3.91258 | 0.009388 | 0.156359 | -2.40953 |
| lnc-CD207-3:1     | 1.065126 | 1.638295 | 3.91188  | 0.009395 | 0.156359 | -2.41032 |
| NONHSAT197139.1   | -1.71966 | 2.65486  | -3.91079 | 0.009406 | 0.156416 | -2.41155 |
| MSTRG.47672.1     | 1.716009 | 2.382925 | 3.910259 | 0.009412 | 0.156416 | -2.41216 |
| lnc-SLC18A1-1:1   | -1.00541 | 5.246795 | -3.90631 | 0.009452 | 0.156766 | -2.41664 |
| lnc-SLC10A6-3:1   | 1.342605 | 2.491429 | 3.906111 | 0.009454 | 0.156766 | -2.41686 |
| NONHSAT188541.1   | 2.056654 | 2.70397  | 3.903541 | 0.00948  | 0.156922 | -2.41978 |
| MSTRG.43658.5     | 1.353571 | 2.684242 | 3.903379 | 0.009482 | 0.156922 | -2.41996 |
| lnc-CDH10-11:1    | -1.13744 | 3.929037 | -3.90336 | 0.009482 | 0.156922 | -2.41999 |
| lnc-AREG-1:6      | -1.57214 | 1.932315 | -3.9027  | 0.009489 | 0.156922 | -2.42074 |
| NONHSAT214781.1   | 1.418014 | 2.449166 | 3.901187 | 0.009504 | 0.157069 | -2.42245 |
| NONHSAT163888.1   | 1.530547 | 4.952304 | 3.900471 | 0.009512 | 0.157069 | -2.42327 |
| NONHSAT214748.1   | 1.212672 | 1.700209 | 3.900463 | 0.009512 | 0.157069 | -2.42327 |
| ENST00000504245.6 | 1.020369 | 4.081558 | 3.89946  | 0.009522 | 0.15709  | -2.42441 |
| NONHSAT189814.1   | 1.391363 | 1.794244 | 3.898909 | 0.009528 | 0.15709  | -2.42504 |
| ENST00000654321.1 | -1.16959 | 1.995139 | -3.8988  | 0.009529 | 0.15709  | -2.42517 |
| NONHSAT158448.1   | 1.051419 | 3.42464  | 3.898642 | 0.00953  | 0.15709  | -2.42534 |
| lnc-BOC-2:1       | 1.079834 | 2.064495 | 3.898524 | 0.009532 | 0.15709  | -2.42548 |
| lnc-CTTNBP2NL-3:1 | -1.16983 | 8.320584 | -3.89627 | 0.009555 | 0.157223 | -2.42804 |
| SAMMSON:10        | 1.154729 | 2.47348  | 3.895525 | 0.009563 | 0.157236 | -2.42888 |
| ENST00000574098.1 | 1.144943 | 1.651718 | 3.894961 | 0.009568 | 0.15726  | -2.42953 |
| NONHSAT187950.1   | -1.10148 | 2.029465 | -3.89291 | 0.00959  | 0.157306 | -2.43186 |
| lnc-TEX10-1:1     | 1.903384 | 3.714464 | 3.892454 | 0.009594 | 0.157306 | -2.43238 |
| NONHSAT154561.1   | 1.408261 | 1.868453 | 3.892323 | 0.009596 | 0.157306 | -2.43252 |
| lnc-GPR137B-8:1   | -1.02504 | 5.344954 | -3.89098 | 0.00961  | 0.157348 | -2.43405 |
| ENST00000657842.1 | -1.22668 | 2.654444 | -3.88764 | 0.009644 | 0.157729 | -2.43785 |
| lnc-UGT1A8-1:1    | 1.223731 | 1.71426  | 3.887137 | 0.00965  | 0.157729 | -2.43842 |
| ENST00000656956.1 | -1.73159 | 3.199496 | -3.88707 | 0.00965  | 0.157729 | -2.4385  |
| ENST00000546804.1 | 2.263743 | 2.900534 | 3.886092 | 0.009661 | 0.157763 | -2.43961 |
| NONHSAT200253.1   | -1.21506 | 2.041617 | -3.88264 | 0.009697 | 0.157942 | -2.44355 |



|                   |          |          |          |          |          |          |
|-------------------|----------|----------|----------|----------|----------|----------|
| lnc-SMAD5-8:1     | 1.106063 | 1.638187 | 3.882612 | 0.009697 | 0.157942 | -2.44358 |
| ENST00000540392.1 | -1.18798 | 2.301003 | -3.88257 | 0.009698 | 0.157942 | -2.44363 |
| LINC00689:9       | 2.070407 | 2.329281 | 3.881817 | 0.009705 | 0.157982 | -2.44448 |
| ENST00000649143.1 | 1.467682 | 1.778385 | 3.880839 | 0.009716 | 0.157983 | -2.44559 |
| lnc-MYNN-9:1      | -1.00114 | 3.571291 | -3.8804  | 0.00972  | 0.158006 | -2.44609 |
| lnc-MUC20-4:3     | 1.600058 | 3.727501 | 3.880075 | 0.009724 | 0.158037 | -2.44646 |
| MSTRG.62727.7     | 1.221582 | 2.648393 | 3.879902 | 0.009726 | 0.158041 | -2.44666 |
| lnc-ANGPT2-3:2    | -1.4095  | 3.584473 | -3.8793  | 0.009732 | 0.158052 | -2.44734 |
| NONHSAT183557.1   | 2.34693  | 3.601404 | 3.878743 | 0.009738 | 0.158062 | -2.44798 |
| ENST00000641075.1 | 1.535627 | 2.477803 | 3.878141 | 0.009744 | 0.158089 | -2.44867 |
| T223393           | 1.03555  | 1.678094 | 3.877788 | 0.009748 | 0.158098 | -2.44907 |
| lnc-ABHD4-6:1     | -1.45502 | 3.011901 | -3.87738 | 0.009752 | 0.158117 | -2.44953 |
| lnc-SERPINB2-1:1  | 1.514963 | 2.470771 | 3.876439 | 0.009762 | 0.158119 | -2.45061 |
| NONHSAT161364.1   | 1.168048 | 5.315073 | 3.876439 | 0.009762 | 0.158119 | -2.45061 |
| NONHSAT158496.1   | -1.05904 | 2.834919 | -3.87618 | 0.009765 | 0.15812  | -2.4509  |
| NONHSAT173254.1   | 1.811105 | 2.915045 | 3.875682 | 0.00977  | 0.158129 | -2.45147 |
| lnc-CYBRD1-1:1    | -1.10259 | 2.496009 | -3.87539 | 0.009773 | 0.158153 | -2.4518  |
| NONHSAT186734.1   | 1.367059 | 2.244974 | 3.875047 | 0.009777 | 0.158162 | -2.45219 |
| NONHSAT166167.1   | -1.04759 | 1.735349 | -3.87424 | 0.009786 | 0.158196 | -2.45312 |
| lnc-LGALSL-5:1    | -1.45275 | 3.289817 | -3.87241 | 0.009805 | 0.158253 | -2.4552  |
| NONHSAT197583.1   | -1.97568 | 4.651031 | -3.87186 | 0.009811 | 0.158253 | -2.45583 |
| NONHSAT193303.1   | -1.02414 | 1.930026 | -3.87165 | 0.009813 | 0.158263 | -2.45606 |
| lnc-NAP1L3-7:1    | 1.394161 | 3.844733 | 3.871347 | 0.009816 | 0.158288 | -2.45641 |
| lnc-RAP2B-2:1     | -1.34147 | 8.95786  | -3.87094 | 0.009821 | 0.158288 | -2.45688 |
| lnc-DUSP26-13:1   | 1.488198 | 2.045811 | 3.870696 | 0.009823 | 0.158288 | -2.45716 |
| T279692           | 1.150652 | 2.13176  | 3.869677 | 0.009834 | 0.158375 | -2.45832 |
| MSTRG.831.1       | 1.370232 | 4.033243 | 3.869033 | 0.009841 | 0.158409 | -2.45905 |
| T148754           | 1.319183 | 3.469128 | 3.868726 | 0.009844 | 0.158409 | -2.4594  |
| lnc-ZNF479-12:1   | -1.20443 | 3.028823 | -3.86767 | 0.009856 | 0.158481 | -2.4606  |
| ENST00000669053.1 | 1.261258 | 2.357839 | 3.866015 | 0.009873 | 0.15855  | -2.4625  |
| NONHSAT223715.1   | 3.269224 | 3.381287 | 3.865568 | 0.009878 | 0.158576 | -2.46301 |
| lnc-ISX-5:1       | 1.313894 | 2.165868 | 3.864075 | 0.009894 | 0.158734 | -2.46471 |
| NONHSAT174436.1   | 2.062192 | 2.473942 | 3.863979 | 0.009895 | 0.158734 | -2.46482 |
| NONHSAT214652.1   | 1.178488 | 3.389958 | 3.863697 | 0.009898 | 0.158734 | -2.46514 |
| ENST00000442815.1 | 1.605455 | 2.856363 | 3.863536 | 0.0099   | 0.158734 | -2.46533 |
| MSTRG.44436.21    | 1.735736 | 2.379579 | 3.862901 | 0.009907 | 0.158734 | -2.46605 |
| ENST00000414418.1 | 1.029894 | 5.639478 | 3.862537 | 0.009911 | 0.158734 | -2.46647 |
| T342925           | -1.05984 | 3.61683  | -3.86231 | 0.009913 | 0.158734 | -2.46673 |
| lnc-IFT80-3:1     | 1.429279 | 2.7681   | 3.860826 | 0.009929 | 0.158805 | -2.46842 |
| NONHSAT171050.1   | 1.870864 | 3.000713 | 3.860189 | 0.009936 | 0.158809 | -2.46915 |
| lnc-CIB2-1:1      | 1.259225 | 3.326322 | 3.860127 | 0.009937 | 0.158809 | -2.46922 |
| NONHSAT210686.1   | 1.196769 | 2.563056 | 3.860126 | 0.009937 | 0.158809 | -2.46922 |
| lnc-ZNF781-2:2    | 1.540773 | 2.05371  | 3.857716 | 0.009963 | 0.159092 | -2.47198 |
| lnc-PITPNB-3:1    | 1.933435 | 2.52199  | 3.85749  | 0.009965 | 0.159092 | -2.47224 |
| lnc-POLR2J2-2:2   | -1.63603 | 7.298314 | -3.85681 | 0.009973 | 0.159092 | -2.47301 |
| lnc-SEL1L3-9:1    | -1.26496 | 8.796072 | -3.85677 | 0.009973 | 0.159092 | -2.47306 |
| NONHSAT213534.1   | -1.04086 | 6.299462 | -3.85516 | 0.00999  | 0.15929  | -2.4749  |
| ENST00000621389.1 | 2.432896 | 6.829352 | 3.853101 | 0.010013 | 0.159395 | -2.47725 |

|                   |          |          |          |          |          |          |
|-------------------|----------|----------|----------|----------|----------|----------|
| NR_073407         | -1.01504 | 3.652289 | -3.85102 | 0.010036 | 0.159604 | -2.47963 |
| MSTRG.5623.1      | 1.674764 | 7.862293 | 3.850294 | 0.010043 | 0.159706 | -2.48046 |
| MSTRG.44407.1     | -1.41726 | 2.574424 | -3.8482  | 0.010066 | 0.159792 | -2.48285 |
| lnc-FOXQ1-14:1    | -1.55853 | 3.11311  | -3.84393 | 0.010113 | 0.160015 | -2.48775 |
| NONHSAT216535.1   | -1.00344 | 1.730933 | -3.8422  | 0.010132 | 0.160164 | -2.48973 |
| NONHSAT178204.1   | -1.01603 | 4.117065 | -3.83965 | 0.010161 | 0.160279 | -2.49265 |
| lnc-DAGLA-3:2     | 1.728303 | 2.288176 | 3.839436 | 0.010163 | 0.160292 | -2.4929  |
| NONHSAT211759.1   | 1.760923 | 4.095951 | 3.838277 | 0.010176 | 0.160394 | -2.49422 |
| lnc-C15orf41-15:1 | -1.20288 | 4.911465 | -3.83677 | 0.010193 | 0.160498 | -2.49595 |
| NONHSAT219305.1   | -1.33297 | 2.035644 | -3.83663 | 0.010194 | 0.160498 | -2.49612 |
| MSTRG.24918.1     | 1.1155   | 1.672692 | 3.836023 | 0.010201 | 0.160513 | -2.49681 |
| ENST00000624459.2 | 1.306324 | 1.879696 | 3.835763 | 0.010204 | 0.160533 | -2.49711 |
| MSTRG.60246.1     | 2.095468 | 2.189073 | 3.835563 | 0.010206 | 0.160543 | -2.49733 |
| lnc-CEP63-3:1     | 1.140671 | 4.462824 | 3.835018 | 0.010212 | 0.160613 | -2.49796 |
| MSTRG.63467.1     | 1.542148 | 2.243673 | 3.83349  | 0.010229 | 0.160683 | -2.49971 |
| ENST00000505575.1 | 1.557698 | 6.361727 | 3.832761 | 0.010237 | 0.160759 | -2.50055 |
| MSTRG.49027.1     | 1.165088 | 2.296292 | 3.831576 | 0.01025  | 0.160766 | -2.50191 |
| lnc-KCMF1-1:2     | 1.289491 | 3.590309 | 3.831372 | 0.010253 | 0.160777 | -2.50214 |
| NONHSAT188113.1   | -1.16683 | 2.65281  | -3.83113 | 0.010255 | 0.160794 | -2.50242 |
| ENST00000625127.3 | -1.13452 | 3.612295 | -3.82985 | 0.01027  | 0.160868 | -2.50388 |
| NONHSAT224049.1   | -1.33429 | 3.435612 | -3.82902 | 0.010279 | 0.160915 | -2.50484 |
| ENST00000412809.1 | 1.276756 | 5.248793 | 3.825765 | 0.010316 | 0.161135 | -2.50858 |
| lnc-ACTRT2-1:3    | 1.287633 | 3.877471 | 3.822741 | 0.01035  | 0.161296 | -2.51205 |
| MSTRG.38433.1     | 1.70397  | 2.173021 | 3.821384 | 0.010365 | 0.161346 | -2.51361 |
| NR_027024         | -1.78577 | 2.39695  | -3.82104 | 0.010369 | 0.161346 | -2.514   |
| lnc-OSBPL1A-7:1   | -1.18887 | 2.555215 | -3.82065 | 0.010373 | 0.161365 | -2.51445 |
| lnc-VGLL4-8:1     | -1.32906 | 7.266264 | -3.81862 | 0.010397 | 0.161422 | -2.51678 |
| NONHSAT163380.1   | -1.12404 | 1.910172 | -3.81859 | 0.010397 | 0.161422 | -2.51682 |
| MSTRG.49184.1     | -1.05627 | 8.272356 | -3.81837 | 0.010399 | 0.161422 | -2.51708 |
| MSTRG.5852.1      | 1.607121 | 2.218097 | 3.816582 | 0.01042  | 0.16165  | -2.51913 |
| lnc-SCGN-6:1      | -1.32149 | 2.201071 | -3.81546 | 0.010433 | 0.161736 | -2.52041 |
| NONHSAT206219.1   | 1.920637 | 5.399823 | 3.815326 | 0.010434 | 0.161736 | -2.52057 |
| NONHSAT154700.1   | 1.143468 | 2.016418 | 3.815323 | 0.010434 | 0.161736 | -2.52058 |
| NONHSAT208204.1   | -1.06743 | 4.48429  | -3.81522 | 0.010435 | 0.161736 | -2.5207  |
| ENST00000437461.1 | 1.002336 | 6.146848 | 3.815107 | 0.010437 | 0.161736 | -2.52082 |
| NR_110702         | -1.15492 | 3.321443 | -3.81478 | 0.01044  | 0.161736 | -2.52121 |
| lnc-PJA1-4:2      | -1.30787 | 4.792384 | -3.81322 | 0.010458 | 0.161746 | -2.523   |
| T290423           | -1.38607 | 5.946177 | -3.81252 | 0.010466 | 0.161746 | -2.5238  |
| lnc-MKKS-8:1      | -1.1733  | 3.021715 | -3.81233 | 0.010468 | 0.161746 | -2.52402 |
| NONHSAT224060.1   | 1.521917 | 3.66023  | 3.811499 | 0.010478 | 0.161762 | -2.52497 |
| NONHSAT160770.1   | 1.504432 | 2.617258 | 3.810282 | 0.010492 | 0.161795 | -2.52638 |
| ENST00000452911.1 | -1.35837 | 1.764724 | -3.80984 | 0.010497 | 0.161795 | -2.52689 |
| lnc-CLEC1B-1:2    | 1.203891 | 5.32643  | 3.809815 | 0.010497 | 0.161795 | -2.52691 |
| NONHSAT207417.1   | 1.274333 | 3.485297 | 3.809727 | 0.010498 | 0.161795 | -2.52701 |
| lnc-ZPBP-8:1      | -1.31087 | 3.900319 | -3.80963 | 0.010499 | 0.161795 | -2.52712 |
| NONHSAT180303.1   | 1.285904 | 2.023428 | 3.808394 | 0.010514 | 0.161795 | -2.52855 |
| lnc-HMGCR-3:1     | 1.726346 | 2.025635 | 3.806299 | 0.010538 | 0.161946 | -2.53096 |
| lnc-MLLT3-2:1     | -1.19023 | 2.611466 | -3.80531 | 0.010549 | 0.161992 | -2.5321  |

|                   |          |          |          |          |          |          |
|-------------------|----------|----------|----------|----------|----------|----------|
| ENST00000567386.1 | -1.12711 | 2.865773 | -3.80436 | 0.01056  | 0.162043 | -2.53319 |
| MSTRG.62109.1     | 1.048406 | 2.436801 | 3.803823 | 0.010566 | 0.162114 | -2.53381 |
| lnc-SLC25A12-8:1  | -1.71747 | 2.865156 | -3.80256 | 0.010581 | 0.162229 | -2.53527 |
| NONHSAT154610.1   | 1.532632 | 2.191768 | 3.802085 | 0.010586 | 0.162225 | -2.53581 |
| lnc-PAX1-10:1     | -1.00868 | 5.08822  | -3.80129 | 0.010596 | 0.162293 | -2.53673 |
| lnc-STRADB-4:1    | -2.04507 | 4.399131 | -3.80076 | 0.010602 | 0.162293 | -2.53734 |
| lnc-TBL1XR1-12:1  | -1.44295 | 2.776757 | -3.80035 | 0.010607 | 0.162293 | -2.53781 |
| NONHSAT176709.1   | 1.892655 | 1.99184  | 3.799939 | 0.010611 | 0.162293 | -2.53829 |
| MSTRG.8952.1      | 1.406263 | 1.810908 | 3.79985  | 0.010612 | 0.162293 | -2.53839 |
| NONHSAT188189.1   | 1.206804 | 2.28797  | 3.799677 | 0.010614 | 0.162293 | -2.53859 |
| MSTRG.52747.10    | -1.03938 | 2.07055  | -3.79963 | 0.010615 | 0.162293 | -2.53864 |
| LINC00887:17      | -1.82517 | 9.894107 | -3.79737 | 0.010641 | 0.162503 | -2.54125 |
| NONHSAT179776.1   | -1.74159 | 3.622118 | -3.79624 | 0.010654 | 0.162584 | -2.54255 |
| NONHSAT171928.1   | 1.387179 | 2.29581  | 3.796198 | 0.010655 | 0.162584 | -2.5426  |
| MSTRG.37738.2     | -1.37791 | 2.899795 | -3.79567 | 0.010661 | 0.162654 | -2.54321 |
| lnc-NYAP2-6:1     | -1.05405 | 3.664289 | -3.79421 | 0.010678 | 0.16275  | -2.5449  |
| ENST00000509750.1 | -1.54798 | 2.139217 | -3.79416 | 0.010679 | 0.16275  | -2.54495 |
| lnc-MPP7-8:2      | -1.50096 | 3.081834 | -3.79323 | 0.01069  | 0.162763 | -2.54602 |
| NONHSAT217154.1   | -1.92846 | 2.85368  | -3.79315 | 0.010691 | 0.162763 | -2.54611 |
| lnc-FCN1-5:1      | 1.41259  | 2.032495 | 3.792986 | 0.010693 | 0.162763 | -2.5463  |
| NONHSAT180875.1   | 1.359757 | 3.875619 | 3.791318 | 0.010712 | 0.162914 | -2.54823 |
| ENST00000416343.2 | -1.79894 | 2.372123 | -3.78915 | 0.010738 | 0.16309  | -2.55074 |
| NONHSAT211083.1   | 1.014012 | 5.25247  | 3.788963 | 0.01074  | 0.16309  | -2.55095 |
| MSTRG.45548.1     | -1.00026 | 3.396087 | -3.78868 | 0.010743 | 0.163091 | -2.55127 |
| lnc-PRR32-8:1     | -1.40569 | 3.396557 | -3.78544 | 0.010782 | 0.163279 | -2.55501 |
| NONHSAT156091.1   | -1.07593 | 1.9822   | -3.78378 | 0.010801 | 0.16344  | -2.55694 |
| lnc-MRPL19-14:1   | -1.19702 | 1.729163 | -3.78198 | 0.010823 | 0.163488 | -2.55901 |
| lnc-FSHR-7:1      | 1.828305 | 1.946259 | 3.78168  | 0.010826 | 0.163488 | -2.55936 |
| NONHSAT218650.1   | -1.2188  | 2.021001 | -3.78101 | 0.010834 | 0.163525 | -2.56013 |
| ENST00000664367.1 | 1.046617 | 3.703711 | 3.780521 | 0.01084  | 0.16355  | -2.5607  |
| ENST00000600074.1 | 1.05713  | 3.905488 | 3.779674 | 0.01085  | 0.16358  | -2.56168 |
| MSTRG.2214.4      | 1.066409 | 1.596368 | 3.779183 | 0.010856 | 0.163603 | -2.56224 |
| lnc-ZNF66-3:1     | 1.145024 | 2.849791 | 3.777999 | 0.01087  | 0.163623 | -2.56361 |
| NONHSAT217657.1   | 1.207054 | 4.306874 | 3.776053 | 0.010893 | 0.163792 | -2.56586 |
| NONHSAT170181.1   | -1.15569 | 2.477915 | -3.77582 | 0.010896 | 0.16381  | -2.56613 |
| lnc-HOXA13-4:1    | 1.038216 | 1.919486 | 3.773808 | 0.01092  | 0.163918 | -2.56846 |
| lnc-ASMT-5:1      | -1.43981 | 1.966695 | -3.77333 | 0.010926 | 0.163918 | -2.56901 |
| lnc-IRF7-1:1      | 1.36509  | 3.595979 | 3.772558 | 0.010935 | 0.163958 | -2.56991 |
| lnc-MIER3-4:1     | -1.11224 | 7.391184 | -3.76863 | 0.010983 | 0.164195 | -2.57445 |
| ENST00000527318.1 | 1.437163 | 4.321933 | 3.768036 | 0.01099  | 0.164195 | -2.57514 |
| NONHSAT187141.1   | 1.575904 | 3.912001 | 3.767741 | 0.010993 | 0.164195 | -2.57548 |
| MSTRG.52730.1     | 1.083798 | 3.053622 | 3.766661 | 0.011007 | 0.164317 | -2.57673 |
| ENST00000660105.1 | -1.12338 | 2.200085 | -3.76564 | 0.011019 | 0.164428 | -2.57791 |
| NONHSAT187340.1   | -1.13469 | 2.270353 | -3.76562 | 0.011019 | 0.164428 | -2.57793 |
| NONHSAT178607.1   | -1.03455 | 6.278283 | -3.76551 | 0.01102  | 0.164428 | -2.57806 |
| NONHSAT153653.1   | -1.2553  | 3.557659 | -3.76471 | 0.01103  | 0.16444  | -2.57899 |
| NONHSAT190185.1   | -1.3297  | 1.779483 | -3.764   | 0.011039 | 0.164458 | -2.57981 |
| NONHSAT164072.1   | -1.59318 | 2.297971 | -3.76246 | 0.011058 | 0.164519 | -2.58159 |

|                   |          |          |          |          |          |          |
|-------------------|----------|----------|----------|----------|----------|----------|
| NONHSAT197747.1   | 1.893944 | 3.993585 | 3.761892 | 0.011065 | 0.164554 | -2.58226 |
| lnc-RGMB-6:1      | -1.3977  | 3.135823 | -3.76174 | 0.011066 | 0.164554 | -2.58244 |
| T072173           | 1.519119 | 2.000639 | 3.760557 | 0.011081 | 0.164673 | -2.5838  |
| NONHSAT217935.1   | 1.695784 | 2.601805 | 3.760483 | 0.011082 | 0.164673 | -2.58389 |
| NONHSAT222083.1   | -1.93419 | 3.681531 | -3.75986 | 0.011089 | 0.164673 | -2.58461 |
| NONHSAT224314.1   | 1.22941  | 4.176277 | 3.75806  | 0.011111 | 0.164829 | -2.5867  |
| lnc-ALPK2-4:2     | 1.004006 | 3.392581 | 3.757183 | 0.011122 | 0.164895 | -2.58771 |
| ENST00000663358.1 | 1.505533 | 2.247059 | 3.75655  | 0.01113  | 0.164986 | -2.58845 |
| MSTRG.53624.1     | -1.3584  | 4.983905 | -3.75568 | 0.011141 | 0.165073 | -2.58946 |
| lnc-TECRL-10:1    | -1.19189 | 12.81817 | -3.75541 | 0.011144 | 0.165097 | -2.58977 |
| ENST00000424252.2 | -1.08395 | 1.920247 | -3.75488 | 0.01115  | 0.165169 | -2.59039 |
| NONHSAT217700.1   | 1.830627 | 5.838113 | 3.754291 | 0.011158 | 0.165231 | -2.59107 |
| NONHSAT217927.1   | -1.59228 | 2.102791 | -3.754   | 0.011161 | 0.165231 | -2.59141 |
| MSTRG.67637.2     | -1.50909 | 3.351723 | -3.75347 | 0.011168 | 0.165231 | -2.59202 |
| lnc-SLC35G3-2:1   | 1.190138 | 3.877956 | 3.753337 | 0.011169 | 0.165232 | -2.59218 |
| lnc-VANGL1-3:1    | -1.1184  | 11.19648 | -3.75186 | 0.011188 | 0.165337 | -2.59389 |
| NONHSAT209549.1   | 1.094752 | 2.188125 | 3.751499 | 0.011192 | 0.165337 | -2.59431 |
| ENST00000614612.1 | -1.12362 | 6.030515 | -3.75148 | 0.011192 | 0.165337 | -2.59433 |
| ENST00000325660.3 | -1.26351 | 2.978711 | -3.75074 | 0.011201 | 0.165389 | -2.59519 |
| MSTRG.15917.1     | -1.34535 | 2.419201 | -3.75057 | 0.011204 | 0.165389 | -2.59539 |
| ENST00000651165.1 | 1.653978 | 2.522564 | 3.750219 | 0.011208 | 0.165389 | -2.59579 |
| ENST00000446321.1 | 1.295576 | 2.846444 | 3.748813 | 0.011225 | 0.165536 | -2.59743 |
| MSTRG.10927.13    | -1.12443 | 5.596434 | -3.74755 | 0.011241 | 0.165586 | -2.59889 |
| MSTRG.12377.1     | -1.24253 | 2.085056 | -3.74732 | 0.011244 | 0.165604 | -2.59916 |
| T145026           | -1.02947 | 5.858834 | -3.74656 | 0.011253 | 0.16567  | -2.60004 |
| MSTRG.26636.1     | -1.3079  | 2.992252 | -3.74522 | 0.01127  | 0.165753 | -2.6016  |
| LINC01467:1       | -1.12392 | 2.001528 | -3.74452 | 0.011279 | 0.165753 | -2.60241 |
| lnc-PHKA1-3:1     | -1.38191 | 4.820993 | -3.7445  | 0.011279 | 0.165753 | -2.60244 |
| lnc-SNX7-7:1      | 1.66484  | 4.191386 | 3.74427  | 0.011282 | 0.165753 | -2.6027  |
| lnc-AWAT2-2:1     | -1.19681 | 2.034013 | -3.74351 | 0.011291 | 0.165839 | -2.60359 |
| NONHSAT182773.1   | -1.52164 | 2.682036 | -3.74238 | 0.011305 | 0.165946 | -2.60489 |
| NONHSAT223177.1   | -1.45316 | 2.537082 | -3.74146 | 0.011317 | 0.16598  | -2.60596 |
| lnc-OR10AD1-1:1   | 1.32165  | 2.487558 | 3.740586 | 0.011328 | 0.166075 | -2.60698 |
| lnc-ENTPD7-2:1    | 1.065331 | 3.325283 | 3.740405 | 0.01133  | 0.166075 | -2.60719 |
| lnc-GPRC5D-1:1    | 1.589201 | 2.419904 | 3.739243 | 0.011345 | 0.166214 | -2.60854 |
| NONHSAT158631.1   | -1.52985 | 2.379764 | -3.73833 | 0.011356 | 0.166281 | -2.60961 |
| NONHSAT184394.1   | 1.521081 | 2.627366 | 3.736957 | 0.011373 | 0.166393 | -2.6112  |
| MSTRG.30056.3     | -1.05914 | 1.87069  | -3.73612 | 0.011384 | 0.166409 | -2.61217 |
| MSTRG.37338.1     | -1.03634 | 2.940804 | -3.73379 | 0.011413 | 0.166564 | -2.61488 |
| NONHSAT204519.1   | 1.386943 | 3.820781 | 3.733024 | 0.011423 | 0.166608 | -2.61578 |
| MSTRG.68367.3     | 1.857148 | 3.296581 | 3.732754 | 0.011426 | 0.166608 | -2.61609 |
| MSTRG.35149.1     | 1.147589 | 3.243373 | 3.732067 | 0.011435 | 0.166667 | -2.61689 |
| ENST00000661436.1 | 1.665868 | 2.0494   | 3.729765 | 0.011464 | 0.166947 | -2.61957 |
| MSTRG.26957.1     | 2.059043 | 2.15028  | 3.728653 | 0.011478 | 0.167032 | -2.62087 |
| MSTRG.2840.1      | 1.093286 | 1.660543 | 3.728594 | 0.011479 | 0.167032 | -2.62093 |
| lnc-KMT2B-1:1     | -1.44981 | 2.127059 | -3.72807 | 0.011486 | 0.167036 | -2.62155 |
| T083618           | 1.423899 | 2.074955 | 3.728046 | 0.011486 | 0.167036 | -2.62157 |
| lnc-E2F8-3:1      | 1.354949 | 1.960267 | 3.727591 | 0.011492 | 0.16704  | -2.6221  |

|                   |          |          |          |          |          |          |
|-------------------|----------|----------|----------|----------|----------|----------|
| ENST00000453951.1 | 1.860343 | 2.670291 | 3.725209 | 0.011522 | 0.167062 | -2.62488 |
| NONHSAT187014.1   | -1.19335 | 8.284327 | -3.72494 | 0.011526 | 0.167062 | -2.62518 |
| lnc-CACNA1I-1:1   | -1.26889 | 3.562998 | -3.72486 | 0.011527 | 0.167062 | -2.62528 |
| lnc-NRG2-8:1      | 1.022901 | 1.889395 | 3.724012 | 0.011537 | 0.167062 | -2.62627 |
| T286199           | 1.165211 | 3.838613 | 3.723939 | 0.011538 | 0.167062 | -2.62636 |
| NONHSAT217991.1   | 1.694827 | 3.701988 | 3.723292 | 0.011547 | 0.167087 | -2.62711 |
| LINC01829:27      | 1.237226 | 3.358172 | 3.719447 | 0.011596 | 0.16752  | -2.63159 |
| MSTRG.7430.1      | -1.29801 | 2.229426 | -3.71879 | 0.011604 | 0.167538 | -2.63236 |
| MAGI1-IT1:2       | 1.09508  | 4.865433 | 3.718503 | 0.011608 | 0.167548 | -2.63269 |
| NONHSAT154311.1   | -1.21376 | 3.096301 | -3.71787 | 0.011616 | 0.167613 | -2.63343 |
| lnc-LOX-4:12      | 1.005786 | 4.316368 | 3.713511 | 0.011673 | 0.167969 | -2.63851 |
| NONHSAT196935.1   | -1.2163  | 3.992794 | -3.71275 | 0.011682 | 0.168013 | -2.6394  |
| lnc-MAGEA1-2:1    | 1.895637 | 2.135952 | 3.712063 | 0.011691 | 0.16805  | -2.6402  |
| NONHSAT154716.1   | 1.634144 | 2.637213 | 3.711588 | 0.011698 | 0.16805  | -2.64076 |
| lnc-MEX3C-7:1     | 1.051365 | 1.907672 | 3.711527 | 0.011698 | 0.16805  | -2.64083 |
| NONHSAT153419.1   | 1.337736 | 2.384837 | 3.709942 | 0.011719 | 0.168179 | -2.64268 |
| ENST00000571506.1 | -1.58079 | 9.056842 | -3.70851 | 0.011737 | 0.16835  | -2.64435 |
| NONHSAT205624.1   | -1.23548 | 2.108444 | -3.70793 | 0.011745 | 0.168388 | -2.64503 |
| NONHSAT157750.1   | -1.0217  | 1.702735 | -3.70751 | 0.011751 | 0.16842  | -2.64552 |
| MSTRG.53367.1     | 1.754222 | 3.073916 | 3.707115 | 0.011756 | 0.168442 | -2.64598 |
| lnc-ADGRF5-2:1    | 1.252822 | 4.419241 | 3.706724 | 0.011761 | 0.168469 | -2.64644 |
| NONHSAT216354.1   | -1.15736 | 3.997911 | -3.70642 | 0.011765 | 0.168502 | -2.64679 |
| ENST00000520426.1 | 1.869441 | 2.543382 | 3.706167 | 0.011768 | 0.168526 | -2.64709 |
| T136954           | -1.56494 | 4.635443 | -3.703   | 0.01181  | 0.168899 | -2.65078 |
| lnc-NPIPA7-1:1    | -1.37037 | 2.639488 | -3.70233 | 0.011818 | 0.168899 | -2.65157 |
| lnc-ZC3H11B-10:1  | -1.27064 | 2.084304 | -3.70076 | 0.011839 | 0.169109 | -2.6534  |
| MSTRG.46430.6     | 1.53209  | 2.627988 | 3.70058  | 0.011841 | 0.169119 | -2.65362 |
| lnc-RARS2-2:1     | -1.23439 | 5.111256 | -3.69982 | 0.011851 | 0.169225 | -2.65451 |
| lnc-SPAG16-11:2   | -1.03353 | 2.387735 | -3.69976 | 0.011852 | 0.169225 | -2.65457 |
| lnc-ZNF490-3:1    | 1.051592 | 3.965338 | 3.698861 | 0.011864 | 0.169273 | -2.65563 |
| lnc-ZNF674-5:1    | -1.30291 | 4.663508 | -3.69678 | 0.011892 | 0.169523 | -2.65806 |
| NONHSAT217040.1   | 1.914608 | 2.580659 | 3.695188 | 0.011913 | 0.169679 | -2.65992 |
| NR_027711         | 1.871859 | 2.525547 | 3.692834 | 0.011944 | 0.169842 | -2.66268 |
| MSTRG.8860.2      | 2.418525 | 3.427377 | 3.692804 | 0.011944 | 0.169842 | -2.66271 |
| MSTRG.15381.1     | 1.189484 | 1.683918 | 3.688991 | 0.011995 | 0.170204 | -2.66717 |
| NONHSAT168663.1   | 1.142616 | 1.763121 | 3.688419 | 0.012003 | 0.170215 | -2.66784 |
| MSTRG.25860.1     | 1.229817 | 6.295297 | 3.688361 | 0.012003 | 0.170215 | -2.66791 |
| ENST00000435832.1 | 1.107895 | 2.023512 | 3.688302 | 0.012004 | 0.170215 | -2.66798 |
| NONHSAT217663.1   | -1.0585  | 4.366459 | -3.68677 | 0.012025 | 0.170245 | -2.66978 |
| T057656           | 1.580559 | 2.335623 | 3.685519 | 0.012042 | 0.170343 | -2.67124 |
| lnc-PEPD-2:1      | 1.701534 | 2.313721 | 3.685487 | 0.012042 | 0.170343 | -2.67128 |
| ENST00000653501.1 | 1.963996 | 2.769607 | 3.684397 | 0.012057 | 0.170343 | -2.67256 |
| MSTRG.6431.1      | 1.345674 | 8.504623 | 3.684345 | 0.012057 | 0.170343 | -2.67262 |
| NONHSAT175233.1   | -1.23594 | 2.436757 | -3.6841  | 0.012061 | 0.170343 | -2.67291 |
| ENST00000570167.1 | -1.37066 | 3.040352 | -3.68409 | 0.012061 | 0.170343 | -2.67292 |
| NONHSAT153483.1   | 1.125057 | 5.790892 | 3.682239 | 0.012086 | 0.170555 | -2.67508 |
| lnc-CCDC177-2:1   | -1.20574 | 4.897746 | -3.68148 | 0.012096 | 0.17065  | -2.67598 |
| NONHSAT210699.1   | 1.194661 | 2.05177  | 3.68114  | 0.0121   | 0.170689 | -2.67637 |

|                   |          |          |          |          |          |          |
|-------------------|----------|----------|----------|----------|----------|----------|
| lnc-ODF1-3:2      | -1.11904 | 8.349093 | -3.68052 | 0.012109 | 0.170752 | -2.6771  |
| NONHSAT155020.1   | 1.489446 | 4.565512 | 3.679809 | 0.012118 | 0.17078  | -2.67793 |
| ENST00000427398.1 | -1.69905 | 7.479965 | -3.67954 | 0.012122 | 0.170783 | -2.67825 |
| lnc-FBXL3-2:1     | -1.71183 | 4.23589  | -3.67952 | 0.012122 | 0.170783 | -2.67827 |
| NONHSAT184469.1   | 1.245199 | 1.712468 | 3.678946 | 0.01213  | 0.170808 | -2.67894 |
| NONHSAT172299.1   | 1.002819 | 1.603203 | 3.678691 | 0.012133 | 0.170823 | -2.67924 |
| NONHSAT162819.1   | 2.167894 | 2.762083 | 3.678368 | 0.012138 | 0.170837 | -2.67962 |
| MSTRG.38860.1     | 1.692877 | 2.475849 | 3.678055 | 0.012142 | 0.170848 | -2.67999 |
| NONHSAT216967.1   | -1.1883  | 2.732648 | -3.6772  | 0.012154 | 0.170886 | -2.68099 |
| ENST00000458316.1 | -1.02605 | 1.997592 | -3.67711 | 0.012155 | 0.170886 | -2.6811  |
| NONHSAT200930.1   | 1.364244 | 5.070775 | 3.676209 | 0.012167 | 0.171033 | -2.68215 |
| NONHSAT155835.1   | 1.312417 | 3.023475 | 3.675445 | 0.012177 | 0.171106 | -2.68305 |
| NONHSAT152995.1   | 1.28654  | 3.212007 | 3.674101 | 0.012196 | 0.171183 | -2.68463 |
| NONHSAT202245.1   | -1.46378 | 1.971568 | -3.67306 | 0.01221  | 0.1713   | -2.68585 |
| NR_121565         | -1.08787 | 2.028689 | -3.67225 | 0.012221 | 0.171384 | -2.6868  |
| ENST00000411862.1 | 1.141555 | 3.730665 | 3.672116 | 0.012223 | 0.171386 | -2.68696 |
| NONHSAT168602.1   | 1.315282 | 3.314586 | 3.671929 | 0.012225 | 0.171393 | -2.68718 |
| lnc-ZNF514-2:1    | 1.679764 | 2.440993 | 3.670986 | 0.012238 | 0.171412 | -2.68828 |
| NONHSAT168020.1   | 1.540686 | 2.599768 | 3.670446 | 0.012246 | 0.171457 | -2.68892 |
| lnc-NPEPPS-1:1    | 1.523836 | 2.783172 | 3.669926 | 0.012253 | 0.171493 | -2.68953 |
| lnc-METTL6-3:1    | 1.189079 | 2.610905 | 3.66951  | 0.012258 | 0.171493 | -2.69001 |
| ENST00000668975.1 | 1.976846 | 2.696269 | 3.66944  | 0.012259 | 0.171493 | -2.6901  |
| LINC02100:18      | 2.045657 | 2.413592 | 3.668488 | 0.012272 | 0.171586 | -2.69122 |
| ENST00000563991.1 | 1.464473 | 3.436429 | 3.667494 | 0.012286 | 0.171664 | -2.69238 |
| NONHSAT157991.1   | 1.106684 | 2.19651  | 3.667434 | 0.012287 | 0.171664 | -2.69245 |
| NONHSAT183140.1   | 1.081369 | 3.961588 | 3.666477 | 0.0123   | 0.171778 | -2.69358 |
| NONHSAT206175.1   | 1.524017 | 2.08841  | 3.666463 | 0.0123   | 0.171778 | -2.69359 |
| T013641           | -1.24946 | 2.315205 | -3.66544 | 0.012314 | 0.171856 | -2.6948  |
| MSTRG.34703.1     | 2.02759  | 2.825224 | 3.665046 | 0.01232  | 0.171856 | -2.69526 |
| MSTRG.54468.1     | 1.908861 | 2.864844 | 3.664945 | 0.012321 | 0.171856 | -2.69538 |
| lnc-THBS2-8:1     | 1.078944 | 3.414749 | 3.663988 | 0.012334 | 0.171864 | -2.6965  |
| lnc-EDNRB-6:1     | -1.20524 | 4.157278 | -3.66391 | 0.012335 | 0.171864 | -2.69659 |
| NONHSAT216874.1   | -1.48188 | 6.462444 | -3.66281 | 0.01235  | 0.171932 | -2.69788 |
| lnc-SNX11-9:1     | -1.50622 | 2.410436 | -3.66022 | 0.012386 | 0.172114 | -2.70093 |
| lnc-APOL2-5:1     | 1.023739 | 3.85227  | 3.658857 | 0.012405 | 0.172231 | -2.70253 |
| lnc-ROCK1-2:2     | -1.50914 | 2.297176 | -3.65843 | 0.012411 | 0.172231 | -2.70303 |
| T306347           | -1.06527 | 9.198923 | -3.6582  | 0.012414 | 0.172231 | -2.7033  |
| ENST00000664888.1 | 1.134229 | 1.90498  | 3.658177 | 0.012415 | 0.172231 | -2.70333 |
| NONHSAT184521.1   | 1.106568 | 1.800871 | 3.657432 | 0.012425 | 0.172333 | -2.70421 |
| NONHSAT163191.1   | -1.46471 | 3.914067 | -3.65741 | 0.012425 | 0.172333 | -2.70424 |
| lnc-TTLL7-11:1    | 1.119207 | 3.430483 | 3.656409 | 0.012439 | 0.172359 | -2.70541 |
| lnc-FAM210A-7:1   | 1.831618 | 2.008274 | 3.655687 | 0.012449 | 0.172427 | -2.70626 |
| NONHSAT163663.1   | 1.107175 | 1.905002 | 3.655489 | 0.012452 | 0.172432 | -2.70649 |
| NONHSAT193636.1   | -1.25082 | 2.136738 | -3.65288 | 0.012488 | 0.172732 | -2.70956 |
| MSTRG.59825.1     | 1.385045 | 3.962054 | 3.652381 | 0.012495 | 0.172757 | -2.71015 |
| MSTRG.36424.3     | 1.438714 | 4.214514 | 3.649791 | 0.012532 | 0.172959 | -2.7132  |
| NONHSAT180304.1   | 2.010831 | 2.726591 | 3.649054 | 0.012542 | 0.173003 | -2.71407 |
| ENST00000419745.1 | 1.08738  | 2.937393 | 3.648892 | 0.012544 | 0.173003 | -2.71426 |

|                   |          |          |          |          |          |          |
|-------------------|----------|----------|----------|----------|----------|----------|
| NONHSAT167604.1   | -1.15583 | 2.063332 | -3.64735 | 0.012566 | 0.173092 | -2.71607 |
| MSTRG.40712.1     | 1.376296 | 1.802948 | 3.646877 | 0.012573 | 0.173137 | -2.71663 |
| lnc-CRB1-2:1      | -1.4378  | 3.064803 | -3.64628 | 0.012581 | 0.173181 | -2.71733 |
| lnc-BMP6-16:1     | 1.307463 | 2.118622 | 3.645349 | 0.012594 | 0.173259 | -2.71843 |
| MSTRG.21431.1     | -1.05601 | 3.0969   | -3.64479 | 0.012602 | 0.173259 | -2.71909 |
| ENST00000498967.3 | 1.396547 | 2.156281 | 3.644253 | 0.01261  | 0.173261 | -2.71972 |
| NONHSAT187841.1   | 1.486279 | 4.025111 | 3.642296 | 0.012637 | 0.173412 | -2.72203 |
| MSTRG.37092.5     | 1.319293 | 3.241691 | 3.639916 | 0.012671 | 0.173563 | -2.72483 |
| lnc-DCBLD1-2:1    | -1.91036 | 4.150235 | -3.63963 | 0.012675 | 0.173563 | -2.72517 |
| ENST00000606010.1 | -1.50415 | 2.15255  | -3.63957 | 0.012676 | 0.173563 | -2.72524 |
| ENST00000515522.1 | 1.975574 | 2.890412 | 3.639122 | 0.012682 | 0.173563 | -2.72577 |
| ENST00000649558.1 | -1.65471 | 2.597932 | -3.6391  | 0.012683 | 0.173563 | -2.7258  |
| NONHSAT171233.1   | 1.297111 | 2.339817 | 3.63856  | 0.01269  | 0.173596 | -2.72643 |
| NR_024338         | -1.08339 | 4.968921 | -3.6372  | 0.01271  | 0.173768 | -2.72804 |
| lnc-VWA8-7:1      | -1.03274 | 2.464248 | -3.63613 | 0.012725 | 0.173819 | -2.72929 |
| ENST00000503757.1 | -1.0642  | 2.351925 | -3.63607 | 0.012726 | 0.173819 | -2.72936 |
| NONHSAT198994.1   | 1.307392 | 3.145279 | 3.636062 | 0.012726 | 0.173819 | -2.72938 |
| NONHSAT180745.1   | 1.372019 | 2.285654 | 3.635843 | 0.012729 | 0.173819 | -2.72964 |
| lnc-IL1RL1-3:1    | -1.58662 | 2.764905 | -3.63452 | 0.012748 | 0.173936 | -2.7312  |
| MSTRG.59558.1     | 1.317947 | 2.500428 | 3.634297 | 0.012751 | 0.173956 | -2.73146 |
| NONHSAT217976.1   | -1.09641 | 4.490974 | -3.63212 | 0.012782 | 0.174246 | -2.73403 |
| MSTRG.28053.1     | 1.074087 | 1.632048 | 3.63174  | 0.012788 | 0.174246 | -2.73448 |
| lnc-ARF6-14:1     | -1.68189 | 2.756668 | -3.63033 | 0.012808 | 0.1743   | -2.73614 |
| lnc-TMEM155-2:1   | -1.64886 | 5.939865 | -3.63013 | 0.012811 | 0.1743   | -2.73638 |
| T203653           | 1.713136 | 3.035482 | 3.62899  | 0.012827 | 0.174452 | -2.73772 |
| MSTRG.52953.1     | 1.849993 | 2.694115 | 3.628818 | 0.01283  | 0.174462 | -2.73793 |
| ENST00000557426.1 | 1.332722 | 4.982013 | 3.628236 | 0.012838 | 0.174553 | -2.73861 |
| NONHSAT160239.1   | -1.14534 | 2.316355 | -3.6281  | 0.01284  | 0.174556 | -2.73877 |
| ENST00000411616.1 | 1.214491 | 2.153878 | 3.627203 | 0.012853 | 0.174627 | -2.73983 |
| ENST00000669320.1 | -1.0191  | 2.591312 | -3.62714 | 0.012854 | 0.174627 | -2.73991 |
| NONHSAT195570.1   | 1.352639 | 2.174815 | 3.626845 | 0.012858 | 0.174658 | -2.74026 |
| NONHSAT180674.1   | 1.042602 | 3.15518  | 3.626742 | 0.01286  | 0.174658 | -2.74038 |
| MSTRG.34112.1     | 1.596687 | 1.888633 | 3.625515 | 0.012877 | 0.174828 | -2.74183 |
| lnc-CSMD2-2:1     | -1.30849 | 2.777458 | -3.62484 | 0.012887 | 0.174876 | -2.74263 |
| MSTRG.44184.1     | -1.25291 | 2.527827 | -3.62467 | 0.01289  | 0.174876 | -2.74283 |
| NONHSAT219667.1   | 1.69838  | 2.401601 | 3.623973 | 0.0129   | 0.174919 | -2.74365 |
| NONHSAT160531.1   | 1.537088 | 3.41393  | 3.622927 | 0.012915 | 0.17496  | -2.74489 |
| NONHSAT211735.1   | -1.07048 | 3.729882 | -3.62124 | 0.012939 | 0.175046 | -2.74688 |
| NONHSAT167072.1   | 1.089097 | 3.509387 | 3.619577 | 0.012964 | 0.175196 | -2.74884 |
| NONHSAT158272.1   | 1.034911 | 3.668101 | 3.617089 | 0.013    | 0.175452 | -2.75179 |
| NONHSAT185048.1   | 1.083887 | 2.148621 | 3.616567 | 0.013008 | 0.175503 | -2.7524  |
| NONHSAT203791.1   | -1.47866 | 1.880194 | -3.61579 | 0.013019 | 0.175503 | -2.75332 |
| ENST00000653239.1 | -1.33719 | 2.038091 | -3.61572 | 0.01302  | 0.175503 | -2.75341 |
| ENST00000439849.1 | 1.32891  | 1.722222 | 3.615044 | 0.01303  | 0.175503 | -2.75421 |
| NONHSAT202843.1   | 1.176528 | 2.006156 | 3.614846 | 0.013033 | 0.175503 | -2.75444 |
| MSTRG.13659.1     | -1.07959 | 1.738589 | -3.61469 | 0.013035 | 0.175503 | -2.75462 |
| ENST00000531347.1 | 1.23495  | 4.089484 | 3.613933 | 0.013046 | 0.175522 | -2.75552 |
| NONHSAT187821.1   | -1.01353 | 1.876114 | -3.61392 | 0.013046 | 0.175522 | -2.75553 |

|                   |          |          |          |          |          |          |
|-------------------|----------|----------|----------|----------|----------|----------|
| MSTRG.50048.2     | -1.41768 | 2.483384 | -3.61279 | 0.013063 | 0.175667 | -2.75687 |
| NONHSAT158528.1   | -1.47939 | 2.606889 | -3.61233 | 0.01307  | 0.175689 | -2.75742 |
| lnc-MS4A8-17:5    | -1.28064 | 2.235777 | -3.61044 | 0.013098 | 0.175899 | -2.75966 |
| NONHSAT201104.1   | 1.991449 | 2.886985 | 3.610405 | 0.013098 | 0.175899 | -2.7597  |
| ENST00000537032.1 | 1.311324 | 3.417778 | 3.609739 | 0.013108 | 0.175943 | -2.76048 |
| NONHSAT169238.1   | 1.218423 | 3.874772 | 3.609485 | 0.013112 | 0.175947 | -2.76078 |
| NR_125852         | 1.596038 | 2.355132 | 3.609105 | 0.013117 | 0.175975 | -2.76123 |
| lnc-HSDL2-3:1     | -1.649   | 3.030719 | -3.60723 | 0.013145 | 0.17616  | -2.76345 |
| lnc-TBC1D32-4:1   | -1.08395 | 7.055313 | -3.60699 | 0.013149 | 0.17616  | -2.76373 |
| ENST00000656923.1 | 1.141826 | 1.934758 | 3.60656  | 0.013155 | 0.176222 | -2.76425 |
| NONHSAT173961.1   | 1.072785 | 1.631861 | 3.604402 | 0.013187 | 0.176428 | -2.7668  |
| ENST00000512245.1 | -1.0939  | 2.269235 | -3.60409 | 0.013192 | 0.176428 | -2.76718 |
| T038690           | -1.06119 | 1.703876 | -3.60358 | 0.013199 | 0.176428 | -2.76777 |
| NONHSAT187390.1   | -1.0715  | 2.228325 | -3.60334 | 0.013203 | 0.176428 | -2.76806 |
| NONHSAT161166.1   | -1.67414 | 2.461854 | -3.60332 | 0.013203 | 0.176428 | -2.76809 |
| NONHSAT170145.1   | 1.628511 | 2.397436 | 3.603287 | 0.013204 | 0.176428 | -2.76813 |
| NONHSAT201834.1   | 1.169307 | 1.981735 | 3.60248  | 0.013216 | 0.176471 | -2.76908 |
| ENST00000648279.1 | -1.75364 | 3.050153 | -3.60102 | 0.013237 | 0.17658  | -2.77081 |
| NONHSAT177713.1   | 1.583513 | 2.249927 | 3.600714 | 0.013242 | 0.17658  | -2.77117 |
| lnc-CTNNA1-4:2    | 1.195708 | 6.558992 | 3.600555 | 0.013244 | 0.17658  | -2.77136 |
| NONHSAT211356.1   | -1.19686 | 8.920102 | -3.60035 | 0.013247 | 0.17658  | -2.77161 |
| lnc-ANKRD45-3:3   | 1.42814  | 3.63372  | 3.59796  | 0.013283 | 0.176748 | -2.77444 |
| T296652           | -1.69269 | 2.442106 | -3.59793 | 0.013284 | 0.176748 | -2.77448 |
| NONHSAT196317.1   | 1.116787 | 1.694347 | 3.597053 | 0.013297 | 0.176864 | -2.77552 |
| lnc-PLPP3-2:5     | 1.245791 | 3.273054 | 3.596925 | 0.013299 | 0.176864 | -2.77567 |
| NONHSAT217987.1   | -1.06486 | 2.489814 | -3.59684 | 0.0133   | 0.176864 | -2.77577 |
| T236780           | -1.12403 | 5.465605 | -3.59582 | 0.013315 | 0.176942 | -2.77698 |
| NONHSAT177087.1   | 1.192343 | 1.98419  | 3.595665 | 0.013317 | 0.176942 | -2.77716 |
| MSTRG.59620.9     | 1.103142 | 1.764337 | 3.594521 | 0.013335 | 0.176947 | -2.77852 |
| NONHSAT220102.1   | -1.70308 | 2.806585 | -3.59447 | 0.013335 | 0.176947 | -2.77857 |
| lnc-SLC15A4-23:1  | -1.05052 | 9.554245 | -3.59355 | 0.013349 | 0.176976 | -2.77967 |
| lnc-ZCCHC17-12:1  | -1.16367 | 1.841073 | -3.59344 | 0.013351 | 0.176976 | -2.7798  |
| NONHSAT177603.1   | -1.41379 | 8.586375 | -3.59319 | 0.013355 | 0.176976 | -2.78009 |
| NONHSAT154326.1   | -1.01314 | 2.075656 | -3.59292 | 0.013359 | 0.176976 | -2.78042 |
| lnc-DAZ1-166:2    | -1.54335 | 2.801445 | -3.59186 | 0.013375 | 0.17702  | -2.78167 |
| lnc-SLC39A11-6:1  | 1.029532 | 2.170983 | 3.591295 | 0.013383 | 0.17702  | -2.78235 |
| NONHSAT205713.1   | 2.206102 | 3.343844 | 3.591111 | 0.013386 | 0.17702  | -2.78256 |
| lnc-THAP3-4:1     | -1.09816 | 2.100132 | -3.58895 | 0.013419 | 0.177232 | -2.78513 |
| lnc-FOXN4-2:1     | 1.34384  | 4.052838 | 3.588627 | 0.013424 | 0.177232 | -2.78551 |
| lnc-DISC1-1:2     | -1.06918 | 6.668332 | -3.58834 | 0.013428 | 0.177244 | -2.78586 |
| ENST00000437837.1 | -1.57109 | 2.050124 | -3.58622 | 0.01346  | 0.177396 | -2.78838 |
| NONHSAT208060.1   | -1.12197 | 1.901528 | -3.58379 | 0.013497 | 0.17765  | -2.79125 |
| NONHSAT218363.1   | -1.46768 | 2.588999 | -3.5819  | 0.013526 | 0.177908 | -2.79351 |
| GPC6-AS2:1        | 1.299926 | 2.166324 | 3.580487 | 0.013548 | 0.1781   | -2.79518 |
| NONHSAT224442.1   | 1.159022 | 1.745809 | 3.578643 | 0.013576 | 0.178285 | -2.79738 |
| ENST00000414776.1 | 1.115689 | 1.921937 | 3.578244 | 0.013582 | 0.178305 | -2.79785 |
| lnc-ZC3H12B-2:4   | 1.297084 | 2.597348 | 3.577444 | 0.013594 | 0.178393 | -2.7988  |
| lnc-INAVA-1:1     | -1.0048  | 4.143854 | -3.57681 | 0.013604 | 0.178424 | -2.79956 |



|                   |          |          |          |          |          |          |
|-------------------|----------|----------|----------|----------|----------|----------|
| lnc-FAM50B-4:2    | 1.529011 | 2.189644 | 3.574316 | 0.013643 | 0.178556 | -2.80252 |
| MSTRG.623.1       | 1.844599 | 3.364683 | 3.573687 | 0.013652 | 0.178556 | -2.80327 |
| NR_027713         | -1.56518 | 3.082906 | -3.57364 | 0.013653 | 0.178556 | -2.80333 |
| NONHSAT218169.1   | 1.80256  | 1.943846 | 3.572469 | 0.013671 | 0.178611 | -2.80472 |
| NONHSAT153503.1   | 1.51365  | 2.796028 | 3.57221  | 0.013675 | 0.178611 | -2.80503 |
| NONHSAT211452.1   | -1.2536  | 2.287592 | -3.57133 | 0.013689 | 0.178616 | -2.80607 |
| lnc-LRRTM1-2:2    | -1.47568 | 3.056266 | -3.57125 | 0.01369  | 0.178616 | -2.80617 |
| NR_026835         | 1.134214 | 3.749899 | 3.570784 | 0.013697 | 0.178616 | -2.80672 |
| lnc-SLC6A15-2:1   | 1.833227 | 2.550342 | 3.56916  | 0.013722 | 0.178742 | -2.80866 |
| NONHSAT197807.1   | 1.521467 | 1.779432 | 3.568497 | 0.013733 | 0.178758 | -2.80945 |
| MSTRG.68181.1     | -1.3944  | 3.058545 | -3.56848 | 0.013733 | 0.178758 | -2.80946 |
| NONHSAT158418.1   | 1.635548 | 2.017842 | 3.567836 | 0.013743 | 0.178836 | -2.81023 |
| NONHSAT164332.1   | -1.08208 | 1.821517 | -3.56732 | 0.013751 | 0.178836 | -2.81085 |
| NONHSAT206493.1   | -1.2039  | 5.989072 | -3.56721 | 0.013753 | 0.178836 | -2.81098 |
| NONHSAT210319.1   | -1.3932  | 3.205395 | -3.56685 | 0.013758 | 0.178869 | -2.8114  |
| NONHSAT206392.1   | -2.64211 | 2.342377 | -3.56217 | 0.013831 | 0.179351 | -2.81698 |
| NONHSAT192321.1   | -1.4595  | 3.333334 | -3.56118 | 0.013847 | 0.179411 | -2.81817 |
| ENST00000429450.1 | -1.45844 | 2.706131 | -3.56085 | 0.013852 | 0.179411 | -2.81856 |
| NONHSAT174611.1   | -1.08745 | 4.245273 | -3.56081 | 0.013853 | 0.179411 | -2.8186  |
| ENST00000451230.1 | 1.554676 | 3.273254 | 3.560403 | 0.013859 | 0.179437 | -2.81909 |
| lnc-KLHL1-10:1    | -1.81296 | 3.424641 | -3.56032 | 0.01386  | 0.179437 | -2.81919 |
| lnc-GADD45B-1:1   | 2.073678 | 2.616241 | 3.560246 | 0.013862 | 0.179437 | -2.81927 |
| MSTRG.41122.1     | 1.86764  | 3.306225 | 3.560163 | 0.013863 | 0.179437 | -2.81937 |
| ENST00000547084.1 | 1.976816 | 4.136076 | 3.559796 | 0.013869 | 0.179465 | -2.81981 |
| NONHSAT205486.1   | -1.49714 | 2.968549 | -3.55949 | 0.013874 | 0.179465 | -2.82018 |
| MSTRG.38772.2     | -1.13042 | 1.740647 | -3.55753 | 0.013904 | 0.179484 | -2.82251 |
| lnc-OR5H1-1:1     | -1.08837 | 2.179077 | -3.55743 | 0.013906 | 0.179484 | -2.82263 |
| lnc-VASP-1:1      | 1.43202  | 3.066536 | 3.557338 | 0.013907 | 0.179484 | -2.82274 |
| lnc-FAM49A-1:1    | -1.19034 | 2.215342 | -3.55718 | 0.01391  | 0.179484 | -2.82294 |
| lnc-RPL21-4:1     | 1.337073 | 3.499824 | 3.555272 | 0.01394  | 0.179674 | -2.82521 |
| NONHSAT157701.1   | 1.270132 | 1.735848 | 3.554319 | 0.013955 | 0.179761 | -2.82634 |
| lnc-HMGCLL1-2:1   | 1.310348 | 3.03237  | 3.55426  | 0.013956 | 0.179761 | -2.82641 |
| ENST00000623971.3 | 1.279497 | 2.329604 | 3.55301  | 0.013976 | 0.179859 | -2.8279  |
| T258078           | -1.19329 | 4.158373 | -3.55044 | 0.014017 | 0.1802   | -2.83097 |
| NONHSAT170849.1   | -1.03495 | 4.869949 | -3.55    | 0.014024 | 0.180228 | -2.8315  |
| lnc-ACSBG2-2:3    | 1.65355  | 4.805025 | 3.54957  | 0.01403  | 0.180262 | -2.83201 |
| lnc-ZNF736-2:1    | 1.225164 | 1.740517 | 3.549467 | 0.014032 | 0.180262 | -2.83213 |
| ENST00000613388.2 | 1.030106 | 5.219996 | 3.54926  | 0.014035 | 0.180281 | -2.83238 |
| MSTRG.56542.1     | 1.036923 | 3.848715 | 3.548686 | 0.014045 | 0.180284 | -2.83307 |
| MSTRG.31863.1     | 1.267012 | 3.901611 | 3.547894 | 0.014057 | 0.180375 | -2.83401 |
| LINC00640:8       | 1.109052 | 3.44731  | 3.547317 | 0.014066 | 0.180375 | -2.8347  |
| lnc-NR2F2-9:1     | 1.069157 | 4.206313 | 3.547253 | 0.014067 | 0.180375 | -2.83478 |
| lnc-PEX10-6:3     | -1.11542 | 5.763554 | -3.54675 | 0.014076 | 0.180375 | -2.83538 |
| lnc-CYSLTR2-2:2   | 1.366835 | 3.848162 | 3.546675 | 0.014077 | 0.180375 | -2.83547 |
| MSTRG.70570.2     | -1.01768 | 1.826406 | -3.54638 | 0.014081 | 0.180411 | -2.83582 |
| NR_110558         | 1.737554 | 2.383129 | 3.545675 | 0.014093 | 0.180411 | -2.83666 |
| T095343           | 1.264555 | 1.804362 | 3.545575 | 0.014094 | 0.180411 | -2.83678 |
| MSTRG.23904.1     | 2.080279 | 3.341355 | 3.545409 | 0.014097 | 0.180411 | -2.83698 |

|                   |          |          |          |          |          |          |
|-------------------|----------|----------|----------|----------|----------|----------|
| NONHSAT206059.1   | 1.089739 | 1.959453 | 3.544442 | 0.014112 | 0.18043  | -2.83813 |
| NONHSAT187409.1   | 1.28983  | 5.002933 | 3.544392 | 0.014113 | 0.18043  | -2.83819 |
| lnc-TADA2B-6:1    | 1.404138 | 2.791769 | 3.544199 | 0.014116 | 0.180447 | -2.83842 |
| ENST00000630100.1 | 1.337651 | 1.850087 | 3.544078 | 0.014118 | 0.180449 | -2.83857 |
| lnc-WDPCP-4:1     | 1.004179 | 6.579133 | 3.543777 | 0.014123 | 0.180464 | -2.83893 |
| MSTRG.47262.1     | 1.081951 | 1.617591 | 3.543668 | 0.014125 | 0.180464 | -2.83906 |
| NONHSAT155354.1   | 1.670655 | 2.201654 | 3.542014 | 0.014151 | 0.180575 | -2.84103 |
| MSTRG.47445.1     | -1.06252 | 3.299376 | -3.54071 | 0.014172 | 0.180662 | -2.84259 |
| ENST00000412918.1 | 1.276367 | 1.963781 | 3.539925 | 0.014185 | 0.180662 | -2.84353 |
| NONHSAT171171.1   | 1.670974 | 2.68341  | 3.538095 | 0.014215 | 0.180832 | -2.84572 |
| NONHSAT158563.1   | 1.46909  | 3.07531  | 3.537242 | 0.014228 | 0.180984 | -2.84674 |
| NONHSAT190143.1   | 1.214784 | 2.875414 | 3.535172 | 0.014262 | 0.181074 | -2.84921 |
| T348942           | -1.0835  | 2.205191 | -3.53492 | 0.014266 | 0.181076 | -2.84952 |
| NONHSAT153293.1   | 1.253945 | 3.213809 | 3.533605 | 0.014287 | 0.181245 | -2.85109 |
| ENST00000449928.1 | -1.26151 | 3.882756 | -3.53354 | 0.014288 | 0.181245 | -2.85116 |
| NONHSAT161030.1   | 1.619211 | 4.297819 | 3.53309  | 0.014296 | 0.181254 | -2.8517  |
| MSTRG.69884.1     | 1.546547 | 2.488121 | 3.532883 | 0.014299 | 0.181254 | -2.85195 |
| MSTRG.57291.1     | -1.4223  | 3.309461 | -3.53283 | 0.0143   | 0.181254 | -2.85201 |
| ENST00000454526.1 | 1.08938  | 2.942045 | 3.532276 | 0.014309 | 0.181266 | -2.85268 |
| ENST00000654462.1 | -1.06442 | 2.101837 | -3.53171 | 0.014318 | 0.181327 | -2.85336 |
| NONHSAT186984.1   | 1.309175 | 2.90095  | 3.530822 | 0.014333 | 0.181375 | -2.85442 |
| MSTRG.41214.11    | -1.07066 | 4.36861  | -3.5301  | 0.014345 | 0.181428 | -2.85528 |
| lnc-SCIN-4:1      | -1.36173 | 2.273913 | -3.5289  | 0.014364 | 0.181524 | -2.85672 |
| lnc-YEATS4-3:1    | -1.15448 | 4.298928 | -3.52888 | 0.014364 | 0.181524 | -2.85674 |
| lnc-TUBB2B-3:1    | 1.376562 | 2.938843 | 3.525137 | 0.014426 | 0.181987 | -2.86122 |
| lnc-C6orf118-6:1  | 1.242115 | 1.699336 | 3.524266 | 0.01444  | 0.182092 | -2.86226 |
| NONHSAT158492.1   | 1.240703 | 1.869593 | 3.523725 | 0.014449 | 0.182121 | -2.86291 |
| MSTRG.46060.1     | -1.11009 | 3.836886 | -3.52173 | 0.014482 | 0.182253 | -2.86531 |
| NONHSAT193401.1   | -1.08615 | 2.977001 | -3.52127 | 0.01449  | 0.182253 | -2.86586 |
| NONHSAT190154.1   | 1.290112 | 1.945069 | 3.521054 | 0.014493 | 0.182253 | -2.86611 |
| lnc-SP3-8:1       | -1.28386 | 2.21354  | -3.52054 | 0.014501 | 0.182253 | -2.86673 |
| NONHSAT148274.1   | -1.27912 | 1.979429 | -3.51986 | 0.014513 | 0.182369 | -2.86754 |
| NONHSAT164867.1   | -1.46927 | 2.449225 | -3.51884 | 0.01453  | 0.182452 | -2.86876 |
| lnc-ZNF487-7:1    | -1.40465 | 3.03381  | -3.51854 | 0.014535 | 0.182486 | -2.86913 |
| NONHSAT214759.1   | -1.02479 | 3.310062 | -3.51723 | 0.014556 | 0.18263  | -2.8707  |
| MSTRG.38157.1     | 1.52445  | 2.285345 | 3.51595  | 0.014578 | 0.182775 | -2.87223 |
| lnc-GATA3-2:1     | 1.828011 | 2.318595 | 3.514295 | 0.014605 | 0.182807 | -2.87421 |
| NONHSAT164821.1   | 1.070179 | 3.212605 | 3.514155 | 0.014607 | 0.182807 | -2.87438 |
| NR_038974         | -1.6204  | 4.092433 | -3.51361 | 0.014617 | 0.182844 | -2.87504 |
| NONHSAT214838.1   | 1.290217 | 1.712786 | 3.513549 | 0.014618 | 0.182844 | -2.87511 |
| LINC02290:25      | -1.66735 | 2.243612 | -3.5129  | 0.014628 | 0.182912 | -2.87588 |
| lnc-IL2RA-7:1     | -1.62818 | 2.487602 | -3.51254 | 0.014634 | 0.182929 | -2.87632 |
| lnc-DLGAP1-7:1    | -1.38318 | 4.883901 | -3.51184 | 0.014646 | 0.182987 | -2.87717 |
| ENST00000424355.1 | -1.1372  | 2.379338 | -3.51109 | 0.014659 | 0.182987 | -2.87806 |
| NONHSAT161171.1   | -1.15899 | 2.242428 | -3.51103 | 0.01466  | 0.182987 | -2.87814 |
| NONHSAT187073.1   | -1.44796 | 3.104999 | -3.51102 | 0.01466  | 0.182987 | -2.87815 |
| MSTRG.10077.1     | -1.12825 | 2.988524 | -3.5087  | 0.014699 | 0.18329  | -2.88093 |
| NONHSAT164555.1   | 1.385991 | 2.61709  | 3.508163 | 0.014708 | 0.18338  | -2.88157 |

|                   |          |          |          |          |          |          |
|-------------------|----------|----------|----------|----------|----------|----------|
| lnc-SYCP2-3:1     | -1.36097 | 3.020062 | -3.5051  | 0.014759 | 0.183667 | -2.88525 |
| MSTRG.58741.1     | 1.323632 | 1.722422 | 3.505016 | 0.014761 | 0.183667 | -2.88535 |
| MSTRG.47492.1     | 1.143893 | 5.359982 | 3.504642 | 0.014767 | 0.183667 | -2.8858  |
| ENST00000438789.1 | -1.23896 | 2.421328 | -3.5043  | 0.014773 | 0.183667 | -2.88621 |
| NONHSAT186941.1   | -1.12276 | 4.519798 | -3.50398 | 0.014778 | 0.183689 | -2.88659 |
| lnc-SOCS6-7:1     | -1.23652 | 4.455044 | -3.50384 | 0.01478  | 0.183695 | -2.88676 |
| NONHSAT167442.1   | -1.02843 | 4.418896 | -3.50294 | 0.014796 | 0.183817 | -2.88784 |
| ENST00000665121.1 | 1.042797 | 3.010697 | 3.502388 | 0.014805 | 0.183888 | -2.88851 |
| NONHSAT205764.1   | -1.05862 | 3.007635 | -3.50115 | 0.014826 | 0.18408  | -2.88999 |
| lnc-CXorf51A-14:1 | -1.15031 | 2.083641 | -3.5006  | 0.014835 | 0.184128 | -2.89065 |
| NONHSAT167478.1   | 1.098077 | 1.916299 | 3.497706 | 0.014884 | 0.184355 | -2.89413 |
| lnc-PRELID2-2:2   | 1.221181 | 3.300166 | 3.497402 | 0.01489  | 0.184355 | -2.8945  |
| NONHSAT190308.1   | 1.194407 | 2.011502 | 3.497348 | 0.014891 | 0.184355 | -2.89456 |
| NONHSAT193133.1   | 1.157645 | 2.773996 | 3.497196 | 0.014893 | 0.184355 | -2.89474 |
| ENST00000614509.1 | -1.26442 | 2.386309 | -3.4949  | 0.014932 | 0.184663 | -2.89751 |
| NONHSAT176802.1   | 1.512483 | 2.42111  | 3.491474 | 0.014991 | 0.185035 | -2.90163 |
| lnc-ATP6V1E1-3:1  | -1.62876 | 2.480102 | -3.49067 | 0.015005 | 0.185093 | -2.90259 |
| lnc-ATF7IP2-6:1   | 1.075895 | 1.699811 | 3.490425 | 0.015009 | 0.185093 | -2.90289 |
| ENST00000560337.1 | -1.75786 | 2.715035 | -3.49013 | 0.015014 | 0.185093 | -2.90325 |
| T351259           | 1.239449 | 1.722997 | 3.488897 | 0.015035 | 0.185157 | -2.90473 |
| lnc-CBR1-1:3      | 1.094037 | 1.784838 | 3.487774 | 0.015055 | 0.185208 | -2.90608 |
| lnc-IRS4-1:1      | 1.535149 | 2.698342 | 3.486802 | 0.015071 | 0.185301 | -2.90725 |
| NONHSAT174416.1   | -1.04546 | 3.927917 | -3.48644 | 0.015078 | 0.185333 | -2.90769 |
| ENST00000658686.1 | -1.26024 | 2.178965 | -3.48582 | 0.015088 | 0.185442 | -2.90844 |
| lnc-RNF113B-5:1   | 1.853999 | 2.953942 | 3.485586 | 0.015092 | 0.185469 | -2.90871 |
| E2F3-IT1:1        | -1.17724 | 4.489231 | -3.48543 | 0.015095 | 0.18548  | -2.9089  |
| NONHSAT205672.1   | -1.06637 | 2.903776 | -3.48496 | 0.015103 | 0.185521 | -2.90947 |
| lnc-TUBGCP3-6:4   | 1.506457 | 7.502348 | 3.4843   | 0.015115 | 0.185584 | -2.91026 |
| NR_110699         | 1.689119 | 2.756239 | 3.483149 | 0.015134 | 0.185607 | -2.91165 |
| NONHSAT202311.1   | 1.47122  | 1.789676 | 3.482608 | 0.015144 | 0.185627 | -2.9123  |
| MSTRG.26789.29    | -1.17725 | 2.471576 | -3.4817  | 0.01516  | 0.185686 | -2.91339 |
| MSTRG.6595.1      | -1.36542 | 1.854238 | -3.48105 | 0.015171 | 0.185729 | -2.91417 |
| NONHSAT216550.1   | 1.383393 | 3.341553 | 3.480936 | 0.015173 | 0.185729 | -2.91431 |
| NONHSAT161150.1   | -1.77593 | 3.036673 | -3.48078 | 0.015176 | 0.185729 | -2.9145  |
| lnc-ARID1B-4:1    | -1.58524 | 4.638487 | -3.47865 | 0.015213 | 0.185933 | -2.91706 |
| NONHSAT160698.1   | 1.076451 | 4.529705 | 3.478407 | 0.015217 | 0.185933 | -2.91736 |
| lnc-RAX-2:1       | -1.10247 | 1.861888 | -3.47775 | 0.015228 | 0.185934 | -2.91815 |
| ENST00000648611.1 | -1.13991 | 2.006914 | -3.47739 | 0.015235 | 0.185948 | -2.91858 |
| MSTRG.8157.30     | 1.173062 | 2.092586 | 3.476615 | 0.015248 | 0.18601  | -2.91952 |
| MSTRG.17146.1     | 1.18115  | 2.008326 | 3.475867 | 0.015261 | 0.18601  | -2.92042 |
| NONHSAT214459.1   | -1.32142 | 2.4791   | -3.4757  | 0.015264 | 0.186018 | -2.92062 |
| lnc-SHPRH-6:1     | 1.235667 | 2.307241 | 3.474623 | 0.015283 | 0.186093 | -2.92192 |
| NONHSAT157869.1   | -1.07545 | 1.786264 | -3.47445 | 0.015286 | 0.186093 | -2.92213 |
| NONHSAT178924.1   | 1.321689 | 2.167728 | 3.474354 | 0.015288 | 0.186093 | -2.92224 |
| NONHSAT191702.1   | 1.21283  | 1.832807 | 3.474202 | 0.01529  | 0.186093 | -2.92243 |
| MSTRG.47239.1     | 1.942273 | 2.607016 | 3.474185 | 0.015291 | 0.186093 | -2.92245 |
| MSTRG.54968.2     | -1.33936 | 2.437402 | -3.47141 | 0.015339 | 0.186419 | -2.92579 |
| LINC01226:10      | 1.378644 | 3.925322 | 3.471128 | 0.015344 | 0.186432 | -2.92613 |

|                   |          |          |          |          |          |          |
|-------------------|----------|----------|----------|----------|----------|----------|
| NONHSAT186686.1   | -1.47637 | 2.688269 | -3.47089 | 0.015349 | 0.186439 | -2.92643 |
| lnc-LRRC49-16:1   | -1.26599 | 2.32835  | -3.47025 | 0.01536  | 0.186477 | -2.92719 |
| lnc-MAD2L1BP-1:1  | -1.14896 | 3.140677 | -3.46826 | 0.015395 | 0.186562 | -2.9296  |
| ENST00000658605.1 | 1.947087 | 2.956788 | 3.467683 | 0.015405 | 0.186562 | -2.93029 |
| NONHSAT154487.1   | 1.030538 | 1.572736 | 3.467428 | 0.01541  | 0.186562 | -2.9306  |
| NONHSAT176814.1   | 1.065947 | 2.516628 | 3.46678  | 0.015421 | 0.186645 | -2.93138 |
| lnc-KLHL25-1:5    | 1.078627 | 3.106216 | 3.464973 | 0.015453 | 0.186716 | -2.93356 |
| lnc-ALDH8A1-4:1   | 1.126359 | 1.585744 | 3.463846 | 0.015473 | 0.186716 | -2.93492 |
| T309954           | 1.364235 | 2.291763 | 3.463585 | 0.015478 | 0.186716 | -2.93524 |
| NONHSAT194939.1   | 1.310906 | 2.137651 | 3.463529 | 0.015479 | 0.186716 | -2.9353  |
| lnc-GTSF1L-8:1    | 1.751762 | 1.977212 | 3.463424 | 0.015481 | 0.186716 | -2.93543 |
| NONHSAT212826.1   | 1.555694 | 2.143142 | 3.463055 | 0.015487 | 0.186773 | -2.93588 |
| NONHSAT220287.1   | 1.018364 | 4.14392  | 3.462805 | 0.015492 | 0.186787 | -2.93618 |
| MSTRG.53962.1     | 1.066822 | 2.016951 | 3.462446 | 0.015498 | 0.186836 | -2.93661 |
| lnc-SHROOM1-2:1   | 1.43175  | 2.439781 | 3.460798 | 0.015528 | 0.186876 | -2.9386  |
| lnc-GNL1-3:2      | -1.14201 | 1.978478 | -3.45968 | 0.015547 | 0.186963 | -2.93995 |
| LINC01387:7       | 1.091628 | 1.642668 | 3.459311 | 0.015554 | 0.186974 | -2.9404  |
| NONHSAT218665.1   | 1.20397  | 1.648432 | 3.45847  | 0.015569 | 0.187043 | -2.94141 |
| lnc-PRKCQ-7:1     | 1.155289 | 4.686243 | 3.458351 | 0.015571 | 0.187047 | -2.94156 |
| NR_024591         | 1.724638 | 2.301329 | 3.458071 | 0.015576 | 0.187085 | -2.9419  |
| T342810           | 1.131136 | 4.853084 | 3.457562 | 0.015585 | 0.18712  | -2.94251 |
| NONHSAT223796.1   | 1.001981 | 2.2198   | 3.457332 | 0.01559  | 0.18712  | -2.94279 |
| NONHSAT163852.1   | 1.486777 | 2.239703 | 3.456485 | 0.015605 | 0.187158 | -2.94381 |
| NONHSAT187508.1   | -1.00486 | 3.381618 | -3.45614 | 0.015611 | 0.187188 | -2.94423 |
| lnc-CDCP1-1:1     | 1.485277 | 4.451599 | 3.455815 | 0.015617 | 0.187214 | -2.94462 |
| ENST00000515623.1 | -1.44566 | 2.102184 | -3.45526 | 0.015627 | 0.187263 | -2.94529 |
| ENST00000440413.1 | 1.20395  | 4.301825 | 3.454288 | 0.015644 | 0.187431 | -2.94647 |
| MSTRG.62115.2     | 1.18803  | 1.648544 | 3.454048 | 0.015649 | 0.187438 | -2.94676 |
| ENST00000436340.2 | 1.16636  | 2.924418 | 3.453876 | 0.015652 | 0.187453 | -2.94697 |
| NONHSAT192899.1   | -1.53542 | 2.555502 | -3.4521  | 0.015684 | 0.187609 | -2.94911 |
| lnc-PANK3-17:1    | -1.31461 | 7.283283 | -3.45203 | 0.015685 | 0.187609 | -2.9492  |
| NONHSAT196990.1   | 1.141829 | 1.71786  | 3.451903 | 0.015687 | 0.187609 | -2.94935 |
| NONHSAT179394.1   | 1.607394 | 2.738991 | 3.451813 | 0.015689 | 0.187609 | -2.94946 |
| ENST00000621571.1 | -1.1674  | 2.996559 | -3.45119 | 0.0157   | 0.187624 | -2.95021 |
| ENST00000582578.2 | 1.128386 | 3.558194 | 3.451127 | 0.015701 | 0.187624 | -2.95029 |
| ENST00000423637.1 | 1.417346 | 3.399601 | 3.450706 | 0.015709 | 0.187651 | -2.9508  |
| NONHSAT177853.1   | 1.443955 | 4.01657  | 3.450178 | 0.015718 | 0.187651 | -2.95144 |
| ENST00000671190.1 | 1.162661 | 3.49544  | 3.449495 | 0.015731 | 0.187685 | -2.95226 |
| lnc-TUBE1-3:1     | 1.20202  | 4.687814 | 3.448803 | 0.015743 | 0.187767 | -2.9531  |
| NONHSAT186529.1   | 1.018922 | 2.634127 | 3.448655 | 0.015746 | 0.187767 | -2.95328 |
| lnc-FAM193B-4:1   | -2.19695 | 3.505321 | -3.44839 | 0.015751 | 0.187792 | -2.9536  |
| lnc-LINS1-5:1     | -1.02954 | 2.713365 | -3.44602 | 0.015794 | 0.188018 | -2.95647 |
| NONHSAT210396.1   | 1.103145 | 4.307495 | 3.443856 | 0.015833 | 0.188128 | -2.95909 |
| ENST00000558370.1 | 1.169874 | 2.228783 | 3.443186 | 0.015845 | 0.188128 | -2.9599  |
| NONHSAT156336.1   | 1.065358 | 1.819654 | 3.443165 | 0.015846 | 0.188128 | -2.95992 |
| T191042           | 1.584561 | 1.867103 | 3.442566 | 0.015857 | 0.188144 | -2.96065 |
| NONHSAT193336.1   | 1.224125 | 1.989191 | 3.44181  | 0.015871 | 0.188174 | -2.96157 |
| MSTRG.65759.1     | 1.446094 | 1.985206 | 3.441686 | 0.015873 | 0.188174 | -2.96172 |

|                   |          |          |          |          |          |          |
|-------------------|----------|----------|----------|----------|----------|----------|
| lnc-ACTL7A-3:1    | -1.05656 | 9.796143 | -3.44052 | 0.015894 | 0.188289 | -2.96313 |
| MSTRG.29239.7     | -1.63887 | 2.646771 | -3.44009 | 0.015902 | 0.188289 | -2.96365 |
| NONHSAT171077.1   | 1.08409  | 1.57664  | 3.440069 | 0.015902 | 0.188289 | -2.96367 |
| MSTRG.37172.1     | 1.095685 | 3.298486 | 3.438267 | 0.015935 | 0.18844  | -2.96586 |
| NONHSAT206952.1   | 1.26972  | 2.051446 | 3.437903 | 0.015942 | 0.18844  | -2.9663  |
| MSTRG.68674.1     | 1.051395 | 3.03571  | 3.437901 | 0.015942 | 0.18844  | -2.9663  |
| lnc-TIMM8A-2:1    | -1.31856 | 5.051019 | -3.43699 | 0.015959 | 0.188493 | -2.96741 |
| NONHSAT191821.1   | -1.10728 | 4.07917  | -3.43532 | 0.01599  | 0.188698 | -2.96943 |
| ENST00000414544.1 | -1.07928 | 3.382399 | -3.4347  | 0.016001 | 0.188698 | -2.97018 |
| NONHSAT166072.1   | 1.213488 | 2.599254 | 3.433996 | 0.016014 | 0.18879  | -2.97103 |
| NONHSAT154722.1   | -1.00284 | 1.773636 | -3.43272 | 0.016038 | 0.188894 | -2.97258 |
| ENST00000570443.2 | 1.082049 | 1.968586 | 3.432647 | 0.016039 | 0.188894 | -2.97267 |
| lnc-HMGXB4-1:1    | -1.10612 | 2.764302 | -3.43105 | 0.016069 | 0.189054 | -2.97461 |
| NONHSAT157713.1   | -1.41013 | 3.70442  | -3.43096 | 0.01607  | 0.189054 | -2.97471 |
| NONHSAT224347.1   | 1.59801  | 3.221907 | 3.430227 | 0.016084 | 0.189123 | -2.9756  |
| NONHSAT214995.1   | -1.50228 | 2.751076 | -3.43014 | 0.016086 | 0.189123 | -2.97571 |
| lnc-GPBP1-9:2     | 1.086543 | 5.689626 | 3.430001 | 0.016088 | 0.189123 | -2.97587 |
| NONHSAT210413.1   | 1.454915 | 2.76062  | 3.428917 | 0.016108 | 0.189147 | -2.97719 |
| NONHSAT203008.1   | 1.940238 | 2.010788 | 3.428636 | 0.016113 | 0.189147 | -2.97753 |
| lnc-EPB41L1-1:4   | 1.343835 | 2.288343 | 3.428573 | 0.016115 | 0.189147 | -2.97761 |
| NONHSAT174101.1   | -1.22334 | 9.056842 | -3.42801 | 0.016125 | 0.189197 | -2.97829 |
| NONHSAT205755.1   | 1.546919 | 2.137897 | 3.427983 | 0.016126 | 0.189197 | -2.97832 |
| lnc-KCNV2-6:1     | 1.087748 | 2.296249 | 3.426439 | 0.016154 | 0.189341 | -2.9802  |
| NONHSAT183014.1   | 1.152373 | 3.193484 | 3.425562 | 0.016171 | 0.189378 | -2.98126 |
| NONHSAT190467.1   | -1.33078 | 4.889004 | -3.42532 | 0.016175 | 0.189405 | -2.98155 |
| NONHSAT215067.1   | -1.26565 | 2.162467 | -3.42448 | 0.016191 | 0.189545 | -2.98257 |
| MSTRG.11344.1     | -1.09889 | 2.651774 | -3.42417 | 0.016197 | 0.189545 | -2.98295 |
| lnc-PPP1R2C-10:1  | 1.106207 | 3.558062 | 3.423779 | 0.016204 | 0.189564 | -2.98342 |
| NR_125388         | 1.718068 | 2.789915 | 3.423559 | 0.016208 | 0.189564 | -2.98369 |
| lnc-GCNT4-3:1     | -1.0071  | 8.145247 | -3.42343 | 0.016211 | 0.189564 | -2.98385 |
| NONHSAT202285.1   | -1.02144 | 1.767202 | -3.42318 | 0.016215 | 0.189564 | -2.98415 |
| ENST00000601906.2 | -1.25572 | 1.852851 | -3.42283 | 0.016222 | 0.189598 | -2.98458 |
| MSTRG.69846.1     | -1.24817 | 5.805568 | -3.42154 | 0.016246 | 0.189773 | -2.98614 |
| lnc-C11orf91-4:1  | 1.672136 | 1.962812 | 3.421313 | 0.01625  | 0.189773 | -2.98642 |
| lnc-ZNF518B-4:1   | -1.5496  | 2.226157 | -3.42092 | 0.016258 | 0.189773 | -2.98689 |
| T269639           | -1.61725 | 3.216258 | -3.42037 | 0.016268 | 0.189808 | -2.98756 |
| MSTRG.13601.1     | 1.381844 | 4.86776  | 3.419129 | 0.016291 | 0.189843 | -2.98907 |
| lnc-TNKS-2:1      | 1.857722 | 2.391296 | 3.418995 | 0.016294 | 0.189843 | -2.98923 |
| NONHSAT153879.1   | -1.84554 | 3.758515 | -3.4186  | 0.016301 | 0.189843 | -2.98971 |
| ENST00000433378.1 | 1.036395 | 4.659995 | 3.41841  | 0.016305 | 0.189843 | -2.98994 |
| ENST00000669105.1 | -1.87404 | 3.210929 | -3.4184  | 0.016305 | 0.189843 | -2.98996 |
| T285662           | -1.57133 | 3.20356  | -3.41768 | 0.016319 | 0.189936 | -2.99083 |
| ENST00000502437.1 | 1.065895 | 4.417285 | 3.416356 | 0.016344 | 0.190112 | -2.99244 |
| NONHSAT188095.1   | 1.195783 | 5.501572 | 3.415971 | 0.016351 | 0.190137 | -2.9929  |
| NONHSAT197278.1   | 1.06139  | 2.028339 | 3.41444  | 0.01638  | 0.190305 | -2.99476 |
| ENST00000654642.1 | 1.002854 | 4.852354 | 3.413514 | 0.016397 | 0.190392 | -2.99589 |
| ENST00000655406.1 | -1.1528  | 1.890479 | -3.412   | 0.016426 | 0.190528 | -2.99773 |
| MSTRG.21490.1     | -1.09125 | 12.31114 | -3.41169 | 0.016432 | 0.19054  | -2.99811 |

|                   |          |          |          |          |          |          |
|-------------------|----------|----------|----------|----------|----------|----------|
| ENST00000509215.1 | 1.240653 | 5.028472 | 3.411617 | 0.016433 | 0.19054  | -2.9982  |
| LINC02116:4       | -1.1803  | 5.508675 | -3.41083 | 0.016448 | 0.190648 | -2.99915 |
| NONHSAT195324.1   | 1.235799 | 1.893571 | 3.410464 | 0.016455 | 0.190692 | -2.9996  |
| lnc-S1PR1-7:1     | 1.082996 | 4.174554 | 3.410038 | 0.016463 | 0.190726 | -3.00012 |
| MSTRG.38541.1     | -1.76373 | 5.879141 | -3.40845 | 0.016494 | 0.190954 | -3.00204 |
| lnc-FAM13C-4:1    | -1.70782 | 3.177997 | -3.40838 | 0.016495 | 0.190954 | -3.00213 |
| lnc-LY6E-6:1      | 1.368239 | 2.041381 | 3.407583 | 0.01651  | 0.191021 | -3.0031  |
| NONHSAT170255.1   | 1.026657 | 3.664062 | 3.406643 | 0.016528 | 0.191185 | -3.00424 |
| NONHSAT221212.1   | 2.177825 | 2.816578 | 3.406153 | 0.016538 | 0.191272 | -3.00484 |
| lnc-SLC16A9-6:1   | 1.173803 | 4.145158 | 3.40521  | 0.016556 | 0.191371 | -3.00599 |
| lnc-FAM120B-3:4   | 1.115812 | 4.038942 | 3.405087 | 0.016558 | 0.191373 | -3.00614 |
| lnc-BTBD3-1:1     | 1.192398 | 2.758272 | 3.405003 | 0.01656  | 0.191373 | -3.00624 |
| lnc-CMKLR1-2:1    | 1.113316 | 3.469108 | 3.404233 | 0.016574 | 0.191456 | -3.00718 |
| NONHSAT205205.1   | 1.430683 | 4.838213 | 3.403722 | 0.016584 | 0.191503 | -3.0078  |
| ENST00000511422.1 | -1.12244 | 1.888129 | -3.40357 | 0.016587 | 0.191514 | -3.00798 |
| ENST00000615692.1 | 1.46373  | 2.549995 | 3.403277 | 0.016593 | 0.191558 | -3.00834 |
| NONHSAT177786.1   | 1.152381 | 1.657242 | 3.401478 | 0.016627 | 0.191815 | -3.01053 |
| NR_003347         | 1.332007 | 1.761294 | 3.401332 | 0.01663  | 0.191815 | -3.01071 |
| MSTRG.35345.7     | 2.004878 | 2.784795 | 3.400861 | 0.016639 | 0.191875 | -3.01128 |
| NONHSAT161591.1   | -1.52394 | 2.665879 | -3.40047 | 0.016647 | 0.191918 | -3.01176 |
| NONHSAT196199.1   | 1.461982 | 3.345854 | 3.399982 | 0.016656 | 0.192005 | -3.01235 |
| lnc-GNG4-2:1      | -1.06441 | 8.796449 | -3.39825 | 0.01669  | 0.192162 | -3.01446 |
| ENST00000549710.1 | 1.424679 | 2.472357 | 3.39809  | 0.016693 | 0.192162 | -3.01465 |
| NONHSAT214929.1   | -1.73484 | 2.581539 | -3.39684 | 0.016717 | 0.192216 | -3.01618 |
| lnc-FAM47B-2:1    | -1.12774 | 7.001593 | -3.39656 | 0.016722 | 0.192216 | -3.01652 |
| lnc-MAL2-1:1      | 1.301    | 3.05041  | 3.394016 | 0.016772 | 0.192395 | -3.01962 |
| NONHSAT211045.1   | 1.180753 | 2.22056  | 3.38993  | 0.016852 | 0.192809 | -3.0246  |
| T155545           | -1.76353 | 3.649642 | -3.38902 | 0.016869 | 0.192983 | -3.02571 |
| T114303           | -1.36645 | 3.916284 | -3.38856 | 0.016878 | 0.193014 | -3.02627 |
| NONHSAT199339.1   | -1.29038 | 2.254137 | -3.38431 | 0.016962 | 0.193535 | -3.03144 |
| T057556           | 1.64966  | 2.849763 | 3.383794 | 0.016972 | 0.193542 | -3.03208 |
| lnc-DTYMK-5:1     | 1.41741  | 1.768531 | 3.383423 | 0.016979 | 0.193546 | -3.03253 |
| NONHSAT180648.1   | 1.470039 | 2.226956 | 3.383173 | 0.016984 | 0.193546 | -3.03284 |
| NONHSAT188135.1   | 1.087201 | 2.204719 | 3.383095 | 0.016986 | 0.193546 | -3.03293 |
| lnc-RRM2B-1:1     | -1.78468 | 2.994729 | -3.38026 | 0.017042 | 0.193848 | -3.03639 |
| lnc-PHLDA3-2:1    | 1.206273 | 3.93082  | 3.38019  | 0.017043 | 0.193848 | -3.03648 |
| lnc-ERG-4:1       | 1.515103 | 1.853143 | 3.379735 | 0.017052 | 0.193848 | -3.03703 |
| lnc-WASHC4-3:2    | 1.200876 | 2.04243  | 3.378984 | 0.017067 | 0.193848 | -3.03795 |
| T219085           | 1.717106 | 2.331916 | 3.378506 | 0.017076 | 0.193848 | -3.03853 |
| NONHSAT210262.1   | 1.271496 | 1.658717 | 3.377862 | 0.017089 | 0.193937 | -3.03932 |
| NONHSAT187404.1   | 1.658099 | 2.073793 | 3.377346 | 0.0171   | 0.193963 | -3.03995 |
| MSTRG.54868.1     | 1.606417 | 3.07082  | 3.375911 | 0.017128 | 0.194047 | -3.0417  |
| NONHSAT190573.1   | -1.20191 | 4.80187  | -3.37454 | 0.017155 | 0.194271 | -3.04337 |
| MSTRG.61489.1     | -1.45753 | 1.959862 | -3.37423 | 0.017161 | 0.194284 | -3.04375 |
| lnc-AGBL1-5:1     | 1.005166 | 5.730754 | 3.374002 | 0.017166 | 0.194284 | -3.04403 |
| NONHSAT191738.1   | 1.182777 | 1.66879  | 3.373856 | 0.017169 | 0.19429  | -3.04421 |
| NONHSAT196874.1   | 1.024593 | 2.318726 | 3.373661 | 0.017173 | 0.19429  | -3.04445 |
| lnc-CRYBA4-12:1   | -1.04968 | 4.814501 | -3.37356 | 0.017175 | 0.19429  | -3.04457 |

|                    |          |          |          |          |          |          |
|--------------------|----------|----------|----------|----------|----------|----------|
| NONHSAT221538.1    | 1.776556 | 3.075028 | 3.373258 | 0.017181 | 0.194299 | -3.04494 |
| NONHSAT201822.1    | 1.078217 | 2.165656 | 3.373163 | 0.017183 | 0.194299 | -3.04506 |
| lnc-ACP4-1:2       | 1.548836 | 2.590464 | 3.372624 | 0.017194 | 0.194306 | -3.04571 |
| lnc-ANKRD30BL-7:7  | 1.304906 | 2.097295 | 3.372612 | 0.017194 | 0.194306 | -3.04573 |
| NONHSAT174237.1    | -1.57678 | 2.841193 | -3.37175 | 0.017211 | 0.194314 | -3.04678 |
| ENST00000454380.1  | 1.034081 | 1.570005 | 3.371197 | 0.017222 | 0.194417 | -3.04746 |
| NONHSAT210401.1    | -1.19068 | 8.722252 | -3.37036 | 0.017239 | 0.194472 | -3.04848 |
| ENST00000609969.1  | 1.942869 | 2.048752 | 3.369408 | 0.017258 | 0.194475 | -3.04964 |
| NONHSAT197073.1    | 1.047411 | 2.145772 | 3.369308 | 0.01726  | 0.194475 | -3.04977 |
| NONHSAT172699.1    | -1.13052 | 5.025858 | -3.36916 | 0.017263 | 0.194475 | -3.04995 |
| MSTRG.45522.1      | 2.104096 | 5.565859 | 3.368998 | 0.017266 | 0.194475 | -3.05014 |
| MSTRG.60557.86     | -1.0157  | 2.431156 | -3.36834 | 0.01728  | 0.194519 | -3.05095 |
| NONHSAT206599.1    | -1.30805 | 1.990024 | -3.36594 | 0.017328 | 0.194847 | -3.05389 |
| NONHSAT218832.1    | -1.30142 | 2.213179 | -3.36558 | 0.017335 | 0.194863 | -3.05433 |
| lnc-CNOT9-1:1      | 1.671042 | 2.491947 | 3.365368 | 0.017339 | 0.194888 | -3.05458 |
| NONHSAT164049.1    | 1.122127 | 1.621197 | 3.364896 | 0.017349 | 0.194888 | -3.05516 |
| NONHSAT216824.1    | -1.13661 | 1.787308 | -3.36434 | 0.01736  | 0.194939 | -3.05584 |
| lnc-PEPD-7:1       | 1.043053 | 1.60971  | 3.362595 | 0.017395 | 0.195215 | -3.05797 |
| lnc-GMDS-14:1      | 1.407273 | 1.789831 | 3.360924 | 0.017429 | 0.195421 | -3.06002 |
| MSTRG.57019.1      | -1.32201 | 4.244187 | -3.36074 | 0.017433 | 0.195442 | -3.06025 |
| NONHSAT148320.1    | 1.364364 | 3.94527  | 3.359932 | 0.01745  | 0.195453 | -3.06123 |
| NONHSAT181502.1    | 1.947415 | 2.471341 | 3.3599   | 0.01745  | 0.195453 | -3.06127 |
| lnc-CYB5R2-3:19    | 1.202883 | 3.445543 | 3.35969  | 0.017454 | 0.195453 | -3.06153 |
| lnc-STK25-2:1      | 1.24332  | 8.63101  | 3.359247 | 0.017463 | 0.195453 | -3.06207 |
| ENST00000558572.1  | 1.433125 | 2.224651 | 3.357904 | 0.017491 | 0.195628 | -3.06371 |
| NONHSAT177890.1    | 2.240896 | 2.164613 | 3.357714 | 0.017495 | 0.195628 | -3.06395 |
| ENST00000650712.1  | -1.32999 | 3.528741 | -3.35735 | 0.017502 | 0.195628 | -3.0644  |
| lnc-CREBL2-3:1     | -1.191   | 2.735567 | -3.35596 | 0.017531 | 0.195686 | -3.0661  |
| NONHSAT205336.1    | -1.10532 | 6.952081 | -3.35531 | 0.017544 | 0.195767 | -3.06689 |
| NONHSAT224078.1    | -1.46719 | 2.085037 | -3.35476 | 0.017555 | 0.195827 | -3.06756 |
| lnc-RIT2-8:1       | -1.33577 | 3.098673 | -3.35282 | 0.017595 | 0.196039 | -3.06994 |
| NONHSAT184560.1    | -1.34573 | 3.740093 | -3.35271 | 0.017597 | 0.196039 | -3.07008 |
| MSTRG.56321.1      | 1.104453 | 1.97897  | 3.352667 | 0.017598 | 0.196039 | -3.07013 |
| ENST00000668860.1  | 1.223291 | 1.944125 | 3.352532 | 0.017601 | 0.196039 | -3.07029 |
| NONHSAT173969.1    | 1.087048 | 3.405761 | 3.35224  | 0.017607 | 0.196079 | -3.07065 |
| STXBP5-AS1:28      | 1.675721 | 2.495865 | 3.351861 | 0.017614 | 0.196079 | -3.07111 |
| T337792            | -1.26442 | 8.922402 | -3.35169 | 0.017618 | 0.196079 | -3.07132 |
| NONHSAT182965.1    | -1.23632 | 2.03653  | -3.35098 | 0.017633 | 0.196129 | -3.0722  |
| NONHSAT216334.1    | 1.250467 | 3.258274 | 3.347204 | 0.01771  | 0.196626 | -3.07682 |
| NONHSAT160068.1    | 1.281157 | 1.749046 | 3.346153 | 0.017732 | 0.19678  | -3.07811 |
| NONHSAT160949.1    | 1.157131 | 1.677538 | 3.345157 | 0.017753 | 0.19686  | -3.07933 |
| lnc-KIDINS220-16:1 | 1.484228 | 3.504883 | 3.344818 | 0.01776  | 0.196876 | -3.07974 |
| T161830            | -1.10269 | 1.821513 | -3.3432  | 0.017793 | 0.196939 | -3.08172 |
| NONHSAT160451.1    | 1.485054 | 2.47507  | 3.34257  | 0.017806 | 0.197025 | -3.0825  |
| lnc-CTU1-2:5       | 1.094985 | 2.217325 | 3.342545 | 0.017807 | 0.197025 | -3.08253 |
| lnc-TRPV6-3:1      | 1.228397 | 5.834305 | 3.342157 | 0.017815 | 0.197059 | -3.08301 |
| MSTRG.44989.1      | -1.55754 | 2.615937 | -3.3415  | 0.017829 | 0.197136 | -3.08381 |
| ENST00000412932.1  | -1.39753 | 1.842618 | -3.34073 | 0.017845 | 0.197205 | -3.08475 |

|                   |          |          |          |          |          |          |
|-------------------|----------|----------|----------|----------|----------|----------|
| MSTRG.17773.1     | 1.041855 | 1.608651 | 3.340086 | 0.017858 | 0.197267 | -3.08555 |
| ENST00000650410.1 | 1.239595 | 2.445869 | 3.339506 | 0.01787  | 0.197371 | -3.08626 |
| NONHSAT160717.1   | -1.66981 | 3.076725 | -3.33836 | 0.017894 | 0.19743  | -3.08766 |
| ENST00000512329.2 | -1.3856  | 3.615118 | -3.33835 | 0.017894 | 0.19743  | -3.08768 |
| lnc-AIG1-9:1      | 1.440569 | 2.564951 | 3.336721 | 0.017928 | 0.197698 | -3.08967 |
| lnc-WNT7B-4:1     | 1.919615 | 6.173257 | 3.33667  | 0.01793  | 0.197698 | -3.08974 |
| T056970           | 1.04485  | 1.947665 | 3.336253 | 0.017938 | 0.197698 | -3.09025 |
| lnc-JMJD1C-8:1    | -1.19075 | 2.155691 | -3.33576 | 0.017949 | 0.197785 | -3.09085 |
| NONHSAT160662.1   | 1.316233 | 3.176508 | 3.33393  | 0.017987 | 0.198035 | -3.0931  |
| lnc-SLC6A14-1:1   | 1.366729 | 3.023584 | 3.33335  | 0.017999 | 0.198042 | -3.09381 |
| ENST00000609497.5 | 1.357504 | 2.076054 | 3.332999 | 0.018007 | 0.198042 | -3.09424 |
| NONHSAT158216.1   | 1.631499 | 3.017795 | 3.331853 | 0.018031 | 0.198176 | -3.09565 |
| lnc-PRR16-3:1     | -1.02552 | 5.150623 | -3.33069 | 0.018055 | 0.198268 | -3.09708 |
| NONHSAT189500.1   | 1.07133  | 2.075712 | 3.329994 | 0.01807  | 0.198294 | -3.09793 |
| NONHSAT215014.1   | 1.543263 | 2.502589 | 3.329943 | 0.018071 | 0.198294 | -3.098   |
| NONHSAT150546.1   | -1.98085 | 2.454175 | -3.32956 | 0.018079 | 0.198319 | -3.09847 |
| lnc-PPP1R14C-1:5  | 1.251009 | 2.072316 | 3.328048 | 0.018111 | 0.19854  | -3.10032 |
| ENST00000601409.1 | -1.20574 | 5.656339 | -3.32728 | 0.018128 | 0.198613 | -3.10127 |
| NONHSAT210310.1   | -1.04364 | 3.468127 | -3.32722 | 0.018129 | 0.198613 | -3.10134 |
| NONHSAT172323.1   | -1.47096 | 2.586939 | -3.32717 | 0.01813  | 0.198613 | -3.1014  |
| MSTRG.19505.10    | -1.13566 | 4.043744 | -3.32705 | 0.018132 | 0.198613 | -3.10155 |
| NONHSAT197607.1   | -1.05716 | 3.819345 | -3.32691 | 0.018135 | 0.198613 | -3.10172 |
| NONHSAT221550.1   | -1.31801 | 1.964826 | -3.32646 | 0.018145 | 0.198671 | -3.10228 |
| NONHSAT153512.1   | -1.04019 | 9.948409 | -3.32637 | 0.018147 | 0.198671 | -3.10239 |
| ENST00000616116.1 | -1.26606 | 3.174095 | -3.32556 | 0.018164 | 0.198733 | -3.10338 |
| NONHSAT167607.1   | -1.12894 | 1.674925 | -3.32528 | 0.01817  | 0.198752 | -3.10373 |
| ENST00000321214.2 | 1.307828 | 3.029206 | 3.324451 | 0.018188 | 0.198923 | -3.10474 |
| ENST00000597346.1 | 1.696703 | 2.432011 | 3.323801 | 0.018201 | 0.198987 | -3.10554 |
| MSTRG.42451.1     | 1.67291  | 2.26284  | 3.323262 | 0.018213 | 0.19907  | -3.10621 |
| ENST00000591110.1 | -1.09005 | 2.193098 | -3.32289 | 0.018221 | 0.199115 | -3.10667 |
| lnc-ZNF37A-15:1   | 1.627492 | 8.584102 | 3.322555 | 0.018228 | 0.199145 | -3.10707 |
| NONHSAT186713.1   | -1.34296 | 1.947606 | -3.32234 | 0.018233 | 0.199145 | -3.10734 |
| NONHSAT191817.1   | -1.43891 | 2.505249 | -3.32219 | 0.018236 | 0.199145 | -3.10753 |
| lnc-JPH3-3:15     | 1.552933 | 2.305493 | 3.321161 | 0.018258 | 0.199176 | -3.10879 |
| lnc-PHF20L1-2:1   | -1.0891  | 2.036232 | -3.32079 | 0.018266 | 0.199176 | -3.10925 |
| NONHSAT202881.1   | 1.451931 | 1.983658 | 3.320386 | 0.018274 | 0.199176 | -3.10974 |
| ENST00000434401.1 | 1.256608 | 2.824024 | 3.320093 | 0.018281 | 0.199176 | -3.1101  |
| lnc-AKR1C2-6:1    | 1.388659 | 2.630826 | 3.31964  | 0.01829  | 0.199184 | -3.11066 |
| NONHSAT202891.1   | -1.11888 | 4.115392 | -3.31811 | 0.018323 | 0.199412 | -3.11254 |
| ENST00000653445.1 | 1.231855 | 1.74644  | 3.317952 | 0.018327 | 0.199412 | -3.11274 |
| NONHSAT166978.1   | 1.734085 | 2.753156 | 3.317387 | 0.018339 | 0.199429 | -3.11343 |
| MSTRG.1808.16     | -1.38488 | 2.091234 | -3.31688 | 0.01835  | 0.199453 | -3.11405 |
| NONHSAT205763.1   | 1.34841  | 1.695625 | 3.316801 | 0.018351 | 0.199453 | -3.11415 |
| MSTRG.19554.1     | -1.06564 | 10.47605 | -3.31664 | 0.018355 | 0.199453 | -3.11435 |
| ENST00000669000.1 | -1.40824 | 4.00636  | -3.31491 | 0.018392 | 0.199608 | -3.11648 |
| T114658           | 1.506774 | 4.945598 | 3.314785 | 0.018395 | 0.199608 | -3.11663 |
| ENST00000429328.2 | -1.72267 | 2.91385  | -3.31348 | 0.018423 | 0.199702 | -3.11823 |
| NONHSAT179060.1   | -1.26528 | 1.98827  | -3.31222 | 0.01845  | 0.199823 | -3.11978 |



|                   |          |          |          |          |          |          |
|-------------------|----------|----------|----------|----------|----------|----------|
| ENST00000652524.1 | -1.66519 | 8.349558 | -3.31204 | 0.018454 | 0.199823 | -3.12001 |
| lnc-TMEM268-4:1   | -1.18912 | 3.047004 | -3.31203 | 0.018454 | 0.199823 | -3.12003 |
| lnc-SMPD2-3:1     | -1.42954 | 2.584624 | -3.31142 | 0.018467 | 0.199858 | -3.12077 |
| lnc-POLE3-7:1     | 1.034055 | 3.591848 | 3.308957 | 0.018521 | 0.200139 | -3.12381 |
| lnc-SP3-14:1      | -2.17099 | 3.545931 | -3.30882 | 0.018524 | 0.20014  | -3.12397 |
| lnc-NEFL-1:2      | 1.362945 | 5.198321 | 3.308237 | 0.018536 | 0.200187 | -3.12469 |
| ENST00000428903.1 | 1.167039 | 2.43105  | 3.306963 | 0.018564 | 0.20029  | -3.12626 |
| ENST00000544195.1 | 1.1019   | 2.647225 | 3.306225 | 0.01858  | 0.200349 | -3.12717 |
| lnc-POLRMT-6:15   | -1.58727 | 7.169336 | -3.30534 | 0.0186   | 0.200376 | -3.12826 |
| NONHSAT179030.1   | 1.471141 | 4.523022 | 3.305283 | 0.018601 | 0.200376 | -3.12833 |
| T084652           | 1.435482 | 2.845602 | 3.304958 | 0.018608 | 0.200376 | -3.12873 |
| lnc-C6orf48-1:1   | 1.223698 | 3.165805 | 3.304911 | 0.018609 | 0.200376 | -3.12879 |
| ENST00000451362.1 | -1.27498 | 4.258313 | -3.30399 | 0.018629 | 0.200376 | -3.12993 |
| NONHSAT191898.1   | -1.08972 | 8.326665 | -3.30385 | 0.018632 | 0.200376 | -3.1301  |
| NONHSAT199953.1   | 1.041029 | 1.728028 | 3.303711 | 0.018635 | 0.200376 | -3.13027 |
| ENST00000670964.1 | 1.140316 | 1.640037 | 3.303464 | 0.01864  | 0.200376 | -3.13057 |
| LINC00239:3       | 1.179459 | 1.662014 | 3.303378 | 0.018642 | 0.200376 | -3.13068 |
| lnc-IRX5-5:1      | 1.210306 | 1.83662  | 3.30326  | 0.018645 | 0.200376 | -3.13082 |
| lnc-FOXO4-4:1     | 1.019079 | 2.294312 | 3.30201  | 0.018672 | 0.200424 | -3.13236 |
| NONHSAT219302.1   | 1.059491 | 2.891012 | 3.301903 | 0.018675 | 0.200424 | -3.1325  |
| lnc-TRIB1-8:1     | -1.07713 | 4.209178 | -3.30139 | 0.018686 | 0.20046  | -3.13313 |
| MSTRG.9158.2      | -1.26592 | 3.349043 | -3.30066 | 0.018702 | 0.200491 | -3.13403 |
| lnc-SLC25A27-3:1  | -1.04328 | 3.358126 | -3.30038 | 0.018708 | 0.200506 | -3.13438 |
| lnc-IQCH-1:1      | -1.10846 | 1.979175 | -3.29988 | 0.018719 | 0.20055  | -3.13499 |
| MSTRG.48741.1     | -1.18274 | 2.472607 | -3.29974 | 0.018722 | 0.20055  | -3.13517 |
| lnc-G2E3-1:1      | -1.64751 | 2.893245 | -3.29941 | 0.018729 | 0.200579 | -3.13557 |
| lnc-HECA-12:2     | 1.410288 | 3.33956  | 3.299342 | 0.018731 | 0.200579 | -3.13565 |
| NONHSAT184287.1   | -1.05658 | 1.987576 | -3.29863 | 0.018747 | 0.200579 | -3.13653 |
| NONHSAT170323.1   | 1.112732 | 2.830851 | 3.298474 | 0.01875  | 0.200579 | -3.13672 |
| NONHSAT176725.1   | -1.07496 | 3.54335  | -3.29823 | 0.018755 | 0.200606 | -3.13702 |
| NONHSAT217056.1   | 1.609868 | 2.95442  | 3.297588 | 0.01877  | 0.200651 | -3.13782 |
| lnc-OR1K1-1:1     | -1.35289 | 2.423998 | -3.29682 | 0.018787 | 0.200651 | -3.13877 |
| ENST00000651680.1 | -1.33026 | 3.216382 | -3.29345 | 0.018861 | 0.201139 | -3.14292 |
| NONHSAT179102.1   | 1.230385 | 4.566259 | 3.292778 | 0.018876 | 0.201197 | -3.14375 |
| ENST00000426017.1 | -1.05431 | 4.394014 | -3.29276 | 0.018876 | 0.201197 | -3.14378 |
| lnc-GAPDH-4:2     | 1.501597 | 1.805106 | 3.290906 | 0.018917 | 0.201474 | -3.14606 |
| NONHSAT215747.1   | 1.491113 | 2.617046 | 3.290869 | 0.018918 | 0.201474 | -3.1461  |
| ENST00000562031.2 | 1.400945 | 3.32244  | 3.290629 | 0.018924 | 0.201487 | -3.1464  |
| MSTRG.23106.1     | 1.018881 | 4.022326 | 3.288668 | 0.018967 | 0.201592 | -3.14882 |
| NONHSAT156703.1   | -1.1895  | 2.164218 | -3.28858 | 0.018969 | 0.201592 | -3.14893 |
| NONHSAT175691.1   | 1.732129 | 2.618895 | 3.287526 | 0.018993 | 0.201677 | -3.15023 |
| lnc-CDR2L-2:3     | -1.1786  | 2.70111  | -3.28677 | 0.01901  | 0.201735 | -3.15116 |
| lnc-EMP2-2:1      | -1.21966 | 2.347859 | -3.28641 | 0.019018 | 0.201735 | -3.15162 |
| NONHSAT193205.1   | -1.11025 | 1.970448 | -3.28612 | 0.019024 | 0.201735 | -3.15197 |
| NONHSAT192665.1   | 1.059421 | 6.141332 | 3.285891 | 0.019029 | 0.201735 | -3.15225 |
| MSTRG.56003.1     | -1.5022  | 4.940016 | -3.28581 | 0.019031 | 0.201735 | -3.15235 |
| NONHSAT219637.1   | 1.457124 | 1.754708 | 3.2853   | 0.019043 | 0.201786 | -3.15298 |
| lnc-MBTPS2-1:1    | 1.168057 | 4.818056 | 3.284273 | 0.019066 | 0.201858 | -3.15425 |

|                   |          |          |          |          |          |          |
|-------------------|----------|----------|----------|----------|----------|----------|
| NONHSAT198358.1   | 2.391464 | 2.959343 | 3.281841 | 0.01912  | 0.202279 | -3.15725 |
| NONHSAT179075.1   | 1.299482 | 2.191557 | 3.281519 | 0.019128 | 0.202334 | -3.15765 |
| lnc-FANCL-6:1     | -1.34794 | 2.375044 | -3.2812  | 0.019135 | 0.202346 | -3.15804 |
| lnc-HRH4-15:1     | 1.31131  | 1.784551 | 3.280514 | 0.01915  | 0.202467 | -3.15889 |
| MSTRG.30074.1     | -1.11314 | 4.313352 | -3.28028 | 0.019155 | 0.202502 | -3.15918 |
| lnc-SLC15A4-16:1  | -1.17625 | 2.943066 | -3.28011 | 0.019159 | 0.202522 | -3.15939 |
| lnc-KLHL36-2:3    | 1.292104 | 3.486698 | 3.279862 | 0.019165 | 0.202559 | -3.1597  |
| NR_110816         | -1.09758 | 4.331874 | -3.27911 | 0.019182 | 0.202654 | -3.16063 |
| T070327           | 1.052509 | 2.616273 | 3.278916 | 0.019186 | 0.202679 | -3.16087 |
| NR_120571         | 1.208538 | 2.515216 | 3.278458 | 0.019197 | 0.202746 | -3.16143 |
| NONHSAT221602.1   | 1.408436 | 1.753496 | 3.278206 | 0.019202 | 0.202784 | -3.16175 |
| NONHSAT203446.1   | -1.04244 | 1.928574 | -3.27756 | 0.019217 | 0.202853 | -3.16254 |
| ENST00000649345.1 | 1.817816 | 3.083037 | 3.276047 | 0.019251 | 0.203037 | -3.16442 |
| NONHSAT202455.1   | 1.16598  | 2.099418 | 3.275302 | 0.019268 | 0.203075 | -3.16534 |
| T357649           | -1.1516  | 4.146576 | -3.27507 | 0.019273 | 0.203086 | -3.16562 |
| MSTRG.57243.4     | 1.058503 | 2.825392 | 3.275036 | 0.019274 | 0.203086 | -3.16566 |
| NONHSAT218131.1   | 1.851353 | 2.753013 | 3.273768 | 0.019303 | 0.203124 | -3.16723 |
| lnc-CALCRL-3:1    | 1.517493 | 2.62556  | 3.273482 | 0.019309 | 0.203171 | -3.16759 |
| MSTRG.46888.2     | 1.327684 | 2.980361 | 3.27308  | 0.019319 | 0.203225 | -3.16808 |
| lnc-OR56A3-1:1    | 1.652806 | 3.054981 | 3.271864 | 0.019346 | 0.203334 | -3.16959 |
| NONHSAT169761.1   | 1.130252 | 3.89391  | 3.271713 | 0.01935  | 0.203335 | -3.16977 |
| T002036           | 1.169389 | 2.131865 | 3.270266 | 0.019383 | 0.2035   | -3.17157 |
| lnc-MAP3K8-5:2    | 1.086919 | 1.626443 | 3.270232 | 0.019384 | 0.2035   | -3.17161 |
| NONHSAT175557.1   | -1.32149 | 3.699518 | -3.27007 | 0.019387 | 0.2035   | -3.17181 |
| ENST00000671143.1 | -1.59748 | 2.577604 | -3.26985 | 0.019392 | 0.2035   | -3.17208 |
| T363691           | 1.146993 | 2.039115 | 3.269656 | 0.019397 | 0.2035   | -3.17232 |
| NONHSAT215803.1   | -1.27098 | 2.159871 | -3.26954 | 0.019399 | 0.2035   | -3.17246 |
| T086049           | 1.405127 | 3.161878 | 3.268959 | 0.019413 | 0.2035   | -3.17318 |
| NONHSAT177484.1   | -1.13927 | 1.799295 | -3.26892 | 0.019413 | 0.2035   | -3.17323 |
| NONHSAT155026.1   | 1.293052 | 6.461722 | 3.26888  | 0.019414 | 0.2035   | -3.17328 |
| ENST00000505018.1 | 1.709372 | 2.256014 | 3.268567 | 0.019422 | 0.2035   | -3.17367 |
| T379777           | 2.015834 | 3.185562 | 3.268249 | 0.019429 | 0.2035   | -3.17406 |
| NONHSAT222296.1   | -1.35437 | 2.742954 | -3.26759 | 0.019444 | 0.203513 | -3.17488 |
| MSTRG.60712.1     | 1.509937 | 2.629441 | 3.26715  | 0.019454 | 0.203513 | -3.17542 |
| NONHSAT150120.1   | -1.31696 | 6.475971 | -3.26705 | 0.019457 | 0.203513 | -3.17555 |
| NONHSAT171906.1   | 1.228936 | 2.544989 | 3.266186 | 0.019476 | 0.203635 | -3.17661 |
| lnc-CYB5R4-2:1    | 1.015038 | 2.910283 | 3.266033 | 0.01948  | 0.203646 | -3.1768  |
| lnc-ODF1-2:1      | -1.49644 | 2.090062 | -3.26533 | 0.019496 | 0.203773 | -3.17768 |
| T271557           | 1.100437 | 2.658156 | 3.265176 | 0.019499 | 0.203788 | -3.17787 |
| NONHSAT183921.1   | -1.29795 | 1.741045 | -3.26382 | 0.019531 | 0.204008 | -3.17954 |
| NONHSAT190400.1   | 1.350622 | 2.646376 | 3.262954 | 0.019551 | 0.204091 | -3.18062 |
| NONHSAT176550.1   | 1.048511 | 5.229739 | 3.261836 | 0.019576 | 0.204235 | -3.182   |
| lnc-SMNDC1-9:1    | 1.004233 | 1.551725 | 3.26117  | 0.019592 | 0.204286 | -3.18283 |
| NONHSAT160965.1   | 1.234013 | 2.063761 | 3.260905 | 0.019598 | 0.204286 | -3.18315 |
| NONHSAT153789.1   | -1.92955 | 2.807905 | -3.26054 | 0.019606 | 0.204292 | -3.1836  |
| NONHSAT169912.1   | 1.167433 | 3.062697 | 3.260033 | 0.019618 | 0.204338 | -3.18423 |
| lnc-OR1S1-1:1     | 1.045225 | 4.337224 | 3.259659 | 0.019627 | 0.204352 | -3.1847  |
| NONHSAT204829.1   | 1.098621 | 1.918502 | 3.257986 | 0.019666 | 0.204501 | -3.18677 |

|                      |          |          |          |          |          |          |
|----------------------|----------|----------|----------|----------|----------|----------|
| lnc-ALX4-17:1        | 1.192028 | 1.787259 | 3.257897 | 0.019668 | 0.204501 | -3.18688 |
| lnc-POC1B-GALNT4-2:1 | 1.323247 | 2.196931 | 3.256344 | 0.019704 | 0.20463  | -3.18881 |
| ENST00000424177.1    | 1.435305 | 2.079266 | 3.25613  | 0.019709 | 0.20463  | -3.18907 |
| NONHSAT208159.1      | 1.815036 | 5.246436 | 3.254247 | 0.019753 | 0.204716 | -3.1914  |
| ENST00000506392.1    | 1.123066 | 1.826515 | 3.253935 | 0.01976  | 0.204728 | -3.19179 |
| NONHSAT153870.1      | -1.2477  | 2.184624 | -3.25375 | 0.019764 | 0.204752 | -3.19202 |
| lnc-C1D-15:1         | -1.09778 | 3.999701 | -3.25324 | 0.019776 | 0.204771 | -3.19266 |
| NONHSAT181849.1      | 1.799267 | 2.403801 | 3.252751 | 0.019788 | 0.204785 | -3.19326 |
| NONHSAT200023.1      | -1.4891  | 2.833802 | -3.25097 | 0.019829 | 0.205026 | -3.19547 |
| NONHSAT156352.1      | 1.175834 | 1.904753 | 3.250326 | 0.019844 | 0.205118 | -3.19627 |
| lnc-MRPS33-4:1       | -1.06781 | 3.092683 | -3.24982 | 0.019856 | 0.205169 | -3.19689 |
| lnc-MBP-6:1          | 1.30297  | 1.932838 | 3.249772 | 0.019857 | 0.205169 | -3.19695 |
| NONHSAT198103.1      | 1.361286 | 2.183095 | 3.249441 | 0.019865 | 0.205228 | -3.19736 |
| ENST00000655873.1    | 1.573994 | 2.394287 | 3.248516 | 0.019887 | 0.205264 | -3.19851 |
| NONHSAT205333.1      | 1.289337 | 3.239397 | 3.248511 | 0.019887 | 0.205264 | -3.19852 |
| ENST00000591038.1    | 1.226706 | 2.916103 | 3.247516 | 0.01991  | 0.20543  | -3.19975 |
| NONHSAT162932.1      | -1.05252 | 2.847531 | -3.24705 | 0.019921 | 0.205472 | -3.20033 |
| MSTRG.22299.1        | 1.00164  | 6.213324 | 3.245157 | 0.019966 | 0.205743 | -3.20268 |
| lnc-TFB2M-4:1        | -1.37074 | 5.350806 | -3.24334 | 0.020009 | 0.205997 | -3.20494 |
| lnc-HS3ST3B1-12:1    | -2.23895 | 2.490624 | -3.2427  | 0.020024 | 0.206061 | -3.20572 |
| MSTRG.45384.1        | 1.727456 | 2.694013 | 3.242694 | 0.020024 | 0.206061 | -3.20574 |
| lnc-C6orf201-9:1     | 1.201682 | 5.993648 | 3.241237 | 0.020059 | 0.206251 | -3.20755 |
| NONHSAT177182.1      | -1.28685 | 9.073172 | -3.24016 | 0.020084 | 0.206393 | -3.20888 |
| lnc-LYPD6-12:1       | 1.056825 | 4.378674 | 3.239449 | 0.020101 | 0.206428 | -3.20976 |
| T043258              | 1.350338 | 3.256486 | 3.238797 | 0.020117 | 0.206465 | -3.21058 |
| lnc-SRSF6-6:1        | -1.05611 | 4.241337 | -3.23858 | 0.020122 | 0.206465 | -3.21085 |
| ENST00000664643.1    | 1.140615 | 2.992767 | 3.238157 | 0.020132 | 0.206484 | -3.21137 |
| lnc-FBN1-1:1         | -1.03502 | 2.713554 | -3.23717 | 0.020156 | 0.20664  | -3.21259 |
| MSTRG.12493.1        | -1.32718 | 2.441719 | -3.23625 | 0.020178 | 0.206755 | -3.21373 |
| MSTRG.30757.1        | -1.23106 | 4.3682   | -3.23556 | 0.020194 | 0.206805 | -3.2146  |
| T302404              | -1.09773 | 2.116712 | -3.23542 | 0.020197 | 0.206809 | -3.21477 |
| lnc-SUMF1-12:4       | 1.843765 | 2.614892 | 3.234699 | 0.020215 | 0.206868 | -3.21567 |
| ENST00000662988.1    | 1.063831 | 1.605997 | 3.232831 | 0.020259 | 0.20699  | -3.21799 |
| NONHSAT203444.1      | 1.668871 | 2.137151 | 3.232388 | 0.02027  | 0.206996 | -3.21854 |
| NONHSAT216502.1      | -1.2003  | 3.422126 | -3.23232 | 0.020272 | 0.206996 | -3.21862 |
| NONHSAT169915.1      | 1.314953 | 2.078051 | 3.23154  | 0.020291 | 0.207076 | -3.21959 |
| lnc-MYC-18:1         | -1.16562 | 11.02894 | -3.23089 | 0.020306 | 0.207214 | -3.2204  |
| NONHSAT175098.1      | 1.43103  | 2.226242 | 3.23031  | 0.02032  | 0.207262 | -3.22112 |
| NONHSAT214984.1      | 1.064836 | 1.67847  | 3.229701 | 0.020335 | 0.207269 | -3.22188 |
| MSTRG.48747.1        | -1.54647 | 2.868762 | -3.22729 | 0.020393 | 0.207499 | -3.22487 |
| T120764              | 1.115481 | 3.326232 | 3.226841 | 0.020404 | 0.207499 | -3.22543 |
| NONHSAT167179.1      | 1.637975 | 4.653405 | 3.22678  | 0.020405 | 0.207499 | -3.22551 |
| lnc-TMPRSS15-25:2    | 1.249683 | 3.277817 | 3.226577 | 0.02041  | 0.207499 | -3.22576 |
| ENST00000638002.1    | -1.23346 | 2.984949 | -3.22526 | 0.020442 | 0.207677 | -3.2274  |
| lnc-ANKRD60-1:3      | 2.000938 | 2.565191 | 3.225033 | 0.020448 | 0.20768  | -3.22768 |
| NONHSAT161485.1      | 1.15614  | 3.404839 | 3.223888 | 0.020475 | 0.207848 | -3.22911 |
| NONHSAT224516.1      | -1.0541  | 3.19112  | -3.22231 | 0.020514 | 0.208102 | -3.23107 |

|                   |          |          |          |          |          |          |
|-------------------|----------|----------|----------|----------|----------|----------|
| lnc-CAMSAP1-1:1   | 1.582384 | 4.478784 | 3.221396 | 0.020536 | 0.208102 | -3.23221 |
| MSTRG.22627.1     | 1.191443 | 1.922111 | 3.221378 | 0.020536 | 0.208102 | -3.23223 |
| lnc-HLA-DQA1-10:1 | 1.243424 | 2.15801  | 3.221259 | 0.020539 | 0.208102 | -3.23238 |
| NONHSAT169582.1   | 1.523333 | 1.821552 | 3.220311 | 0.020562 | 0.208102 | -3.23356 |
| lnc-EIF5-1:2      | 1.588772 | 2.557817 | 3.220297 | 0.020563 | 0.208102 | -3.23358 |
| lnc-ZFYVE28-2:1   | -1.04595 | 3.534908 | -3.22021 | 0.020565 | 0.208102 | -3.23369 |
| NONHSAT177413.1   | -1.22966 | 3.40046  | -3.21996 | 0.020571 | 0.208102 | -3.234   |
| ENST00000421041.1 | 1.099344 | 4.06774  | 3.219863 | 0.020573 | 0.208102 | -3.23412 |
| MSTRG.37535.1     | -1.01657 | 4.328585 | -3.21972 | 0.020577 | 0.208102 | -3.23429 |
| NONHSAT212456.1   | -1.10552 | 2.349216 | -3.21927 | 0.020588 | 0.208102 | -3.23485 |
| NONHSAT178822.1   | 1.290825 | 2.115326 | 3.218425 | 0.020609 | 0.208194 | -3.23591 |
| NONHSAT179237.1   | -1.25479 | 2.384073 | -3.21802 | 0.020618 | 0.208194 | -3.23641 |
| NONHSAT158557.1   | 1.098135 | 3.598438 | 3.217915 | 0.020621 | 0.208194 | -3.23654 |
| lnc-EFCAB1-5:3    | 1.038675 | 1.60436  | 3.215531 | 0.020679 | 0.208472 | -3.23951 |
| ENST00000524011.1 | 1.010446 | 3.957638 | 3.21536  | 0.020684 | 0.208472 | -3.23972 |
| ENST00000653211.1 | -1.28159 | 2.42422  | -3.21441 | 0.020707 | 0.208588 | -3.24091 |
| lnc-SLC45A4-5:1   | -1.51318 | 10.16708 | -3.2142  | 0.020712 | 0.208588 | -3.24117 |
| MSTRG.57559.6     | -1.38242 | 7.956592 | -3.21413 | 0.020714 | 0.208588 | -3.24125 |
| lnc-AKR1E2-10:1   | -1.42644 | 3.040431 | -3.21355 | 0.020728 | 0.208649 | -3.24198 |
| NONHSAT201158.1   | 1.362281 | 3.701562 | 3.213039 | 0.020741 | 0.208693 | -3.24262 |
| ENST00000657048.1 | -1.05186 | 3.448634 | -3.21248 | 0.020754 | 0.208726 | -3.24331 |
| lnc-F13B-2:1      | 1.168775 | 2.962665 | 3.212162 | 0.020762 | 0.208753 | -3.24371 |
| NONHSAT194365.1   | 1.132962 | 1.667756 | 3.211964 | 0.020767 | 0.208753 | -3.24395 |
| NONHSAT214981.1   | 1.392361 | 1.850281 | 3.211957 | 0.020767 | 0.208753 | -3.24396 |
| lnc-LPP-5:1       | 1.281544 | 1.726777 | 3.210399 | 0.020806 | 0.208806 | -3.2459  |
| NONHSAT197714.1   | 1.518639 | 3.566945 | 3.210228 | 0.02081  | 0.208809 | -3.24612 |
| ENST00000510176.1 | -1.44487 | 2.40484  | -3.2101  | 0.020813 | 0.208809 | -3.24628 |
| MSTRG.51281.1     | -1.03223 | 1.858809 | -3.21005 | 0.020814 | 0.208809 | -3.24634 |
| ENST00000648410.1 | -1.29816 | 2.292148 | -3.20975 | 0.020822 | 0.208822 | -3.24671 |
| NONHSAT161481.1   | 1.094651 | 5.165569 | 3.209102 | 0.020838 | 0.208913 | -3.24752 |
| ENST00000428920.2 | 1.391058 | 5.178665 | 3.20905  | 0.020839 | 0.208913 | -3.24759 |
| lnc-VSTM5-3:1     | 1.204784 | 1.687798 | 3.2087   | 0.020848 | 0.20894  | -3.24802 |
| ENST00000429980.6 | -1.44835 | 3.064513 | -3.208   | 0.020865 | 0.208958 | -3.24889 |
| MSTRG.39548.1     | -1.00654 | 2.823316 | -3.2077  | 0.020873 | 0.208958 | -3.24926 |
| ENST00000440516.1 | -1.9845  | 2.073655 | -3.20734 | 0.020882 | 0.208958 | -3.24972 |
| NONHSAT196979.1   | 1.314733 | 2.001147 | 3.207112 | 0.020887 | 0.208958 | -3.25    |
| LINC00879:4       | -1.0262  | 1.985754 | -3.20671 | 0.020897 | 0.208973 | -3.2505  |
| NONHSAT190409.1   | 1.588059 | 2.986712 | 3.206492 | 0.020903 | 0.208973 | -3.25077 |
| T197635           | -1.03219 | 1.992923 | -3.2062  | 0.02091  | 0.208973 | -3.25114 |
| lnc-DDIT4L-4:1    | 1.049085 | 2.04088  | 3.205807 | 0.02092  | 0.209002 | -3.25163 |
| NONHSAT163867.1   | 1.109263 | 4.576065 | 3.205538 | 0.020926 | 0.209002 | -3.25196 |
| MSTRG.52731.1     | -1.17188 | 2.679265 | -3.2053  | 0.020932 | 0.209015 | -3.25226 |
| ENST00000554614.2 | 1.074716 | 4.674396 | 3.204541 | 0.020951 | 0.20908  | -3.25321 |
| lnc-PRL-9:1       | 1.866893 | 2.674804 | 3.204456 | 0.020953 | 0.20908  | -3.25331 |
| NONHSAT190142.1   | 1.348239 | 3.94163  | 3.203836 | 0.020969 | 0.209174 | -3.25409 |
| ENST00000653358.1 | 1.386161 | 2.550514 | 3.202921 | 0.020992 | 0.209254 | -3.25523 |
| lnc-ZNF77-3:1     | -1.09452 | 4.864544 | -3.2023  | 0.021007 | 0.209325 | -3.256   |
| lnc-IL2RG-2:1     | 1.345409 | 3.033653 | 3.201706 | 0.021022 | 0.209412 | -3.25674 |

|                   |          |          |          |          |          |          |
|-------------------|----------|----------|----------|----------|----------|----------|
| MSTRG.608.1       | -1.55514 | 6.699756 | -3.2     | 0.021065 | 0.209616 | -3.25887 |
| MSTRG.67272.1     | 1.663898 | 2.402912 | 3.199769 | 0.021071 | 0.209616 | -3.25916 |
| lnc-CD38-12:3     | 1.077307 | 5.856068 | 3.199683 | 0.021073 | 0.209616 | -3.25927 |
| NONHSAT176413.1   | -1.24819 | 3.444563 | -3.19939 | 0.02108  | 0.209634 | -3.25963 |
| NONHSAT167354.1   | 1.157024 | 1.933929 | 3.199323 | 0.021082 | 0.209634 | -3.25972 |
| NONHSAT150645.1   | -1.24568 | 3.163586 | -3.1989  | 0.021092 | 0.20972  | -3.26025 |
| lnc-TCF24-4:1     | -1.17147 | 2.342996 | -3.19805 | 0.021114 | 0.209868 | -3.2613  |
| NONHSAT197729.1   | 1.420809 | 2.508872 | 3.197807 | 0.02112  | 0.209888 | -3.26161 |
| NONHSAT203890.1   | 1.011457 | 5.397593 | 3.196884 | 0.021143 | 0.209994 | -3.26276 |
| NONHSAT157986.1   | -1.63804 | 3.651581 | -3.19666 | 0.021149 | 0.21001  | -3.26304 |
| ENST00000456337.1 | -1.15229 | 2.213597 | -3.19587 | 0.021168 | 0.210122 | -3.26402 |
| lnc-TM2D3-2:3     | -1.033   | 3.152977 | -3.19568 | 0.021173 | 0.210122 | -3.26426 |
| MSTRG.63532.1     | 1.412402 | 2.278737 | 3.195632 | 0.021174 | 0.210122 | -3.26432 |
| MSTRG.40451.1     | -1.25496 | 2.906266 | -3.19472 | 0.021197 | 0.210246 | -3.26546 |
| MSTRG.55816.1     | 1.462511 | 2.878926 | 3.1924   | 0.021256 | 0.210537 | -3.26836 |
| lnc-VPS26C-14:1   | 1.455988 | 2.339118 | 3.19143  | 0.021281 | 0.2106   | -3.26957 |
| NONHSAT201975.1   | 1.128227 | 2.952437 | 3.191384 | 0.021282 | 0.2106   | -3.26963 |
| MSTRG.25518.1     | -1.77174 | 1.99131  | -3.18899 | 0.021343 | 0.21096  | -3.27262 |
| MSTRG.68174.1     | 1.44593  | 1.891923 | 3.187841 | 0.021372 | 0.211147 | -3.27405 |
| lnc-ARAP2-11:1    | 1.061886 | 3.84041  | 3.187561 | 0.021379 | 0.211167 | -3.2744  |
| lnc-LSG1-2:1      | -1.31618 | 2.524479 | -3.1868  | 0.021398 | 0.2112   | -3.27535 |
| lnc-POTEB3-2:1    | -1.36689 | 2.366748 | -3.18548 | 0.021432 | 0.21133  | -3.277   |
| MSTRG.47110.2     | -1.31497 | 4.260578 | -3.18545 | 0.021433 | 0.21133  | -3.27704 |
| lnc-NTF3-4:1      | 1.637291 | 2.8951   | 3.185124 | 0.021441 | 0.211354 | -3.27745 |
| NONHSAT179936.1   | 1.151129 | 1.692532 | 3.184682 | 0.021453 | 0.211424 | -3.278   |
| lnc-BCAS1-6:1     | -1.36959 | 5.729601 | -3.18313 | 0.021492 | 0.211609 | -3.27994 |
| NONHSAT186288.1   | -1.02899 | 2.350068 | -3.18227 | 0.021514 | 0.211704 | -3.28102 |
| ENST00000379677.2 | 1.335115 | 3.252197 | 3.182211 | 0.021516 | 0.211704 | -3.28109 |
| MSTRG.15583.2     | -1.28642 | 2.430114 | -3.18189 | 0.021524 | 0.211732 | -3.28149 |
| MSTRG.61020.3     | -1.1808  | 2.416934 | -3.18151 | 0.021534 | 0.211753 | -3.28196 |
| NONHSAT149101.1   | -1.65879 | 2.986218 | -3.18039 | 0.021563 | 0.211908 | -3.28337 |
| NONHSAT218083.1   | 1.600334 | 2.700469 | 3.179496 | 0.021586 | 0.212008 | -3.28448 |
| lnc-TNFSF15-3:1   | 1.123332 | 2.900481 | 3.178613 | 0.021608 | 0.212123 | -3.28559 |
| lnc-FGF16-1:1     | -1.5243  | 4.151101 | -3.17849 | 0.021611 | 0.212123 | -3.28574 |
| lnc-NR3C2-6:1     | -1.77778 | 4.384344 | -3.17848 | 0.021612 | 0.212123 | -3.28576 |
| NONHSAT162938.1   | 1.269498 | 2.459346 | 3.177268 | 0.021643 | 0.212224 | -3.28727 |
| lnc-ITGA6-3:1     | 2.102599 | 5.129147 | 3.176572 | 0.021661 | 0.212312 | -3.28814 |
| ENST00000624882.1 | 1.559958 | 2.629383 | 3.175584 | 0.021687 | 0.212381 | -3.28938 |
| NONHSAT209661.1   | 1.843552 | 2.738594 | 3.175258 | 0.021695 | 0.212381 | -3.28979 |
| lnc-CPS1-5:2      | 1.622664 | 3.014677 | 3.175245 | 0.021695 | 0.212381 | -3.2898  |
| NONHSAT151052.1   | 1.450249 | 2.477903 | 3.174449 | 0.021716 | 0.212443 | -3.2908  |
| lnc-ESM1-4:1      | 1.577606 | 4.950301 | 3.173852 | 0.021731 | 0.212532 | -3.29154 |
| lnc-ANXA10-4:1    | 1.360596 | 4.26673  | 3.173201 | 0.021748 | 0.212569 | -3.29236 |
| lnc-FAR2-1:1      | 1.264545 | 3.323464 | 3.172675 | 0.021762 | 0.212569 | -3.29302 |
| NONHSAT166826.1   | 1.364696 | 3.278386 | 3.172652 | 0.021763 | 0.212569 | -3.29305 |
| MSTRG.5963.1      | 1.398849 | 2.480229 | 3.172021 | 0.021779 | 0.212667 | -3.29384 |
| lnc-CLIC6-5:1     | 1.043021 | 1.714734 | 3.17164  | 0.021789 | 0.212723 | -3.29431 |
| lnc-BIN3-7:1      | 1.238012 | 2.726618 | 3.167267 | 0.021903 | 0.213411 | -3.29979 |

|                   |          |          |          |          |          |          |
|-------------------|----------|----------|----------|----------|----------|----------|
| ENST00000456036.2 | -1.1888  | 3.93756  | -3.16722 | 0.021904 | 0.213411 | -3.29985 |
| lnc-CENPN-1:1     | 1.240091 | 2.77728  | 3.167168 | 0.021906 | 0.213411 | -3.29991 |
| ENST00000504409.3 | 1.416873 | 2.773753 | 3.166207 | 0.021931 | 0.213438 | -3.30112 |
| ENST00000450669.2 | 1.246922 | 1.675695 | 3.165671 | 0.021945 | 0.213501 | -3.30179 |
| MSTRG.46264.1     | 1.288698 | 2.112975 | 3.164058 | 0.021987 | 0.21368  | -3.30381 |
| LINC01684:29      | -1.03264 | 2.262749 | -3.16387 | 0.021992 | 0.21368  | -3.30405 |
| ENST00000542577.2 | 1.424347 | 2.60303  | 3.163719 | 0.021996 | 0.21368  | -3.30423 |
| NONHSAT167643.1   | 1.070527 | 1.977502 | 3.16368  | 0.021997 | 0.21368  | -3.30428 |
| NONHSAT199449.1   | 1.399113 | 2.591753 | 3.163626 | 0.021999 | 0.21368  | -3.30435 |
| ENST00000645557.1 | 1.735718 | 3.011321 | 3.163463 | 0.022003 | 0.213687 | -3.30455 |
| LINC00402:2       | 1.47239  | 1.788549 | 3.161466 | 0.022055 | 0.214002 | -3.30706 |
| NONHSAT153835.1   | -1.18145 | 4.244898 | -3.16111 | 0.022065 | 0.214048 | -3.3075  |
| NONHSAT218574.1   | 1.096459 | 2.777353 | 3.160896 | 0.02207  | 0.214051 | -3.30777 |
| lnc-ZC3H12B-8:1   | -1.43024 | 2.607711 | -3.1603  | 0.022086 | 0.214051 | -3.30852 |
| NONHSAT182095.1   | 1.543542 | 2.353813 | 3.159962 | 0.022095 | 0.214095 | -3.30894 |
| lnc-SCARB1-6:1    | -1.19895 | 8.185319 | -3.15972 | 0.022102 | 0.214116 | -3.30924 |
| NONHSAT154348.1   | 1.037156 | 3.816979 | 3.158738 | 0.022128 | 0.214289 | -3.31047 |
| NONHSAT197088.1   | -1.14164 | 2.983215 | -3.15759 | 0.022158 | 0.214477 | -3.31192 |
| NONHSAT214447.1   | 1.317298 | 2.603437 | 3.156509 | 0.022187 | 0.214615 | -3.31327 |
| lnc-KMT5A-20:1    | 1.162125 | 6.555596 | 3.155569 | 0.022212 | 0.214732 | -3.31445 |
| lnc-PRR26-5:1     | 1.709007 | 2.986456 | 3.155395 | 0.022216 | 0.214732 | -3.31467 |
| NONHSAT190512.1   | 1.372749 | 3.642226 | 3.155193 | 0.022222 | 0.214763 | -3.31492 |
| NONHSAT167016.1   | -1.50908 | 6.386891 | -3.1539  | 0.022256 | 0.214856 | -3.31654 |
| ENST00000434730.1 | 1.432721 | 1.875012 | 3.153303 | 0.022272 | 0.214858 | -3.31729 |
| NONHSAT158004.1   | -1.84261 | 3.143412 | -3.1527  | 0.022288 | 0.214889 | -3.31804 |
| ENST00000661809.1 | 1.129579 | 3.564066 | 3.152406 | 0.022296 | 0.214895 | -3.31842 |
| ENST00000503695.4 | -1.61319 | 4.093979 | -3.15236 | 0.022297 | 0.214895 | -3.31847 |
| NONHSAT197999.1   | -1.46942 | 3.470553 | -3.15137 | 0.022323 | 0.214971 | -3.31971 |
| ENST00000663658.1 | 1.323349 | 2.420355 | 3.151347 | 0.022324 | 0.214971 | -3.31975 |
| NONHSAT188020.1   | -1.52912 | 3.743384 | -3.15108 | 0.022331 | 0.215007 | -3.32008 |
| NONHSAT180828.1   | 1.136891 | 5.301602 | 3.151048 | 0.022332 | 0.215007 | -3.32012 |
| NONHSAT200629.1   | -1.30548 | 8.061352 | -3.15016 | 0.022356 | 0.215152 | -3.32123 |
| lnc-LIG4-2:1      | -1.0023  | 5.916636 | -3.14927 | 0.02238  | 0.215265 | -3.32235 |
| NONHSAT187334.1   | 1.495686 | 2.009412 | 3.147241 | 0.022434 | 0.215434 | -3.3249  |
| MSTRG.36572.18    | 1.673355 | 3.038907 | 3.147019 | 0.02244  | 0.21545  | -3.32518 |
| lnc-ZNF267-5:1    | 1.215887 | 3.150776 | 3.146829 | 0.022445 | 0.215461 | -3.32541 |
| NONHSAT162129.1   | 1.482039 | 2.792398 | 3.146801 | 0.022446 | 0.215461 | -3.32545 |
| lnc-OPHN1-3:1     | -1.13854 | 3.437094 | -3.1467  | 0.022449 | 0.215461 | -3.32558 |
| lnc-UTP18-2:2     | 1.801267 | 1.93232  | 3.145778 | 0.022473 | 0.215484 | -3.32673 |
| ENST00000588548.1 | -1.00819 | 5.649489 | -3.14551 | 0.022481 | 0.215512 | -3.32707 |
| lnc-CXorf38-6:1   | 1.326982 | 2.578384 | 3.145099 | 0.022492 | 0.215518 | -3.32759 |
| NONHSAT224192.1   | 1.134133 | 4.289238 | 3.144713 | 0.022502 | 0.215554 | -3.32807 |
| MSTRG.20203.1     | 1.541719 | 3.26869  | 3.142867 | 0.022552 | 0.215748 | -3.33039 |
| MSTRG.840.1       | 1.919775 | 2.406244 | 3.14276  | 0.022555 | 0.215748 | -3.33052 |
| NONHSAT195156.1   | 1.097994 | 1.651241 | 3.142581 | 0.02256  | 0.215748 | -3.33075 |
| lnc-TSPY10-8:1    | 1.920304 | 4.008568 | 3.141958 | 0.022577 | 0.215795 | -3.33153 |
| ENST00000620563.1 | -1.19238 | 5.522617 | -3.14094 | 0.022604 | 0.215894 | -3.3328  |
| NR_126010         | 1.609171 | 2.41213  | 3.140564 | 0.022614 | 0.215951 | -3.33328 |

|                     |          |          |          |          |          |          |
|---------------------|----------|----------|----------|----------|----------|----------|
| NONHSAT158138.1     | 1.118819 | 1.620058 | 3.140337 | 0.022621 | 0.215989 | -3.33357 |
| ENST00000562900.1   | 1.381328 | 2.751031 | 3.138921 | 0.022659 | 0.216111 | -3.33535 |
| ENST00000671197.1   | 1.172867 | 2.630536 | 3.138592 | 0.022668 | 0.216135 | -3.33576 |
| MSTRG.29873.1       | 1.481894 | 3.470423 | 3.138432 | 0.022672 | 0.216135 | -3.33596 |
| lnc-UBXN6-2:4       | 1.45064  | 3.419176 | 3.138063 | 0.022682 | 0.216135 | -3.33642 |
| ENST00000540906.1   | 1.055279 | 3.69601  | 3.137925 | 0.022686 | 0.216144 | -3.3366  |
| lnc-GDPD4-3:3       | 1.672586 | 2.335476 | 3.135595 | 0.02275  | 0.216572 | -3.33953 |
| ENST00000509711.2   | -1.49709 | 2.608599 | -3.13528 | 0.022758 | 0.216626 | -3.33992 |
| NR_126564           | 1.708904 | 2.771904 | 3.134665 | 0.022775 | 0.216705 | -3.34069 |
| NONHSAT160448.1     | -1.00874 | 2.818388 | -3.1345  | 0.022779 | 0.216726 | -3.3409  |
| ENST00000661222.1   | 1.769237 | 3.13677  | 3.133554 | 0.022805 | 0.216891 | -3.34209 |
| NONHSAT170011.1     | -1.1388  | 2.094086 | -3.13019 | 0.022897 | 0.217317 | -3.34632 |
| lnc-HNRNPA1P48-17:1 | 1.198743 | 2.045181 | 3.130192 | 0.022898 | 0.217317 | -3.34632 |
| MSTRG.65994.1       | 1.180795 | 4.501825 | 3.12978  | 0.022909 | 0.217337 | -3.34684 |
| lnc-SYT5-1:2        | 1.023496 | 2.168323 | 3.129392 | 0.02292  | 0.217402 | -3.34733 |
| T280150             | -1.48328 | 1.85344  | -3.1284  | 0.022947 | 0.217498 | -3.34857 |
| MSTRG.26213.1       | 1.541568 | 2.531752 | 3.127007 | 0.022985 | 0.217707 | -3.35033 |
| NONHSAT178788.1     | -1.19116 | 2.479284 | -3.12678 | 0.022991 | 0.217716 | -3.35061 |
| lnc-PLCD1-5:1       | -1.01573 | 7.368604 | -3.12655 | 0.022998 | 0.217716 | -3.3509  |
| NONHSAT202399.1     | -1.0254  | 1.829727 | -3.1256  | 0.023024 | 0.217761 | -3.3521  |
| lnc-SLITRK5-3:2     | 1.044487 | 1.723908 | 3.124625 | 0.023051 | 0.217893 | -3.35332 |
| NONHSAT209770.1     | 1.796365 | 2.325164 | 3.124456 | 0.023056 | 0.217917 | -3.35353 |
| NONHSAT177868.1     | 1.049664 | 3.785112 | 3.123471 | 0.023083 | 0.218073 | -3.35477 |
| MSTRG.15651.1       | -1.25277 | 2.310342 | -3.12276 | 0.023103 | 0.21817  | -3.35568 |
| NONHSAT224511.1     | 1.187088 | 4.363922 | 3.122712 | 0.023104 | 0.21817  | -3.35573 |
| MSTRG.12746.1       | -1.30735 | 2.223014 | -3.12237 | 0.023114 | 0.218222 | -3.35616 |
| NONHSAT153830.1     | 2.120868 | 3.72732  | 3.122351 | 0.023114 | 0.218222 | -3.35618 |
| NONHSAT207830.1     | -1.28148 | 2.775229 | -3.12152 | 0.023137 | 0.218318 | -3.35723 |
| lnc-NAIF1-1:4       | -1.11044 | 1.953946 | -3.12139 | 0.023141 | 0.218332 | -3.3574  |
| NONHSAT167961.1     | -1.41562 | 1.972724 | -3.12103 | 0.023151 | 0.218332 | -3.35785 |
| lnc-RHBDL2-2:1      | 1.728764 | 2.857411 | 3.120711 | 0.02316  | 0.218332 | -3.35825 |
| NONHSAT154672.1     | -1.21468 | 6.530623 | -3.1207  | 0.02316  | 0.218332 | -3.35826 |
| MSTRG.67610.1       | 1.195124 | 1.669598 | 3.12069  | 0.02316  | 0.218332 | -3.35828 |
| MSTRG.72589.1       | 1.866363 | 2.53022  | 3.120013 | 0.023179 | 0.218449 | -3.35913 |
| T258398             | -2.02602 | 3.71366  | -3.11891 | 0.02321  | 0.218576 | -3.36052 |
| NONHSAT205824.1     | 1.41348  | 4.650181 | 3.118614 | 0.023218 | 0.218591 | -3.36089 |
| LINC01714:22        | 1.533011 | 2.857196 | 3.118135 | 0.023232 | 0.218628 | -3.36149 |
| lnc-LBH-4:1         | 1.264623 | 1.905296 | 3.118096 | 0.023233 | 0.218628 | -3.36154 |
| lnc-LMOD3-4:1       | -1.03896 | 3.599666 | -3.11809 | 0.023233 | 0.218628 | -3.36155 |
| NONHSAT170016.1     | 1.717864 | 2.306547 | 3.117519 | 0.023249 | 0.218655 | -3.36227 |
| lnc-OFD1-3:1        | 1.298824 | 1.705476 | 3.116991 | 0.023264 | 0.218713 | -3.36293 |
| lnc-HTR2C-5:1       | -1.23002 | 2.825812 | -3.11634 | 0.023282 | 0.218822 | -3.36375 |
| ENST00000568430.1   | -1.01104 | 4.809228 | -3.11603 | 0.023291 | 0.218865 | -3.36415 |
| NR_125983           | -1.25111 | 2.017237 | -3.11582 | 0.023296 | 0.218878 | -3.36441 |
| ENST00000450681.1   | 1.637636 | 2.529003 | 3.115196 | 0.023314 | 0.21891  | -3.36519 |
| NONHSAT186781.1     | 1.1379   | 4.37352  | 3.11482  | 0.023324 | 0.218932 | -3.36567 |
| NONHSAT218677.1     | -1.08053 | 3.697918 | -3.11409 | 0.023345 | 0.218973 | -3.36658 |
| NONHSAT209857.1     | -1.30347 | 3.67931  | -3.11258 | 0.023387 | 0.219106 | -3.36849 |

|                   |          |          |          |          |          |          |
|-------------------|----------|----------|----------|----------|----------|----------|
| T153361           | 1.327718 | 3.345921 | 3.111997 | 0.023404 | 0.219134 | -3.36923 |
| NONHSAT222813.1   | 2.091216 | 3.064131 | 3.111655 | 0.023413 | 0.219142 | -3.36966 |
| lnc-KCNJ12-7:1    | -1.12227 | 2.403653 | -3.11141 | 0.02342  | 0.219142 | -3.36996 |
| MSTRG.10987.2     | -1.00608 | 1.895376 | -3.1111  | 0.023429 | 0.219185 | -3.37036 |
| NONHSAT167367.1   | -1.44682 | 3.420337 | -3.11099 | 0.023432 | 0.21919  | -3.3705  |
| lnc-PRR32-9:1     | -1.48479 | 2.385764 | -3.11064 | 0.023442 | 0.219208 | -3.37094 |
| ENST00000442936.1 | -1.05092 | 3.462946 | -3.11034 | 0.023451 | 0.219208 | -3.37132 |
| ENST00000424678.1 | 1.226621 | 1.701454 | 3.109762 | 0.023467 | 0.219281 | -3.37204 |
| ENST00000635852.1 | 1.403969 | 3.022932 | 3.109011 | 0.023488 | 0.219414 | -3.37299 |
| lnc-PROKR2-2:3    | -1.18744 | 2.916837 | -3.1083  | 0.023508 | 0.219451 | -3.37389 |
| NR_033423         | -1.31965 | 3.865559 | -3.10773 | 0.023524 | 0.219503 | -3.3746  |
| lnc-SP4-4:1       | 1.109783 | 2.498153 | 3.107317 | 0.023536 | 0.21952  | -3.37512 |
| NONHSAT171819.1   | -1.52883 | 2.209    | -3.10631 | 0.023565 | 0.219598 | -3.3764  |
| lnc-SLC39A10-12:1 | 1.325759 | 1.713799 | 3.106251 | 0.023566 | 0.219598 | -3.37647 |
| ENST00000453953.6 | -1.13372 | 10.82272 | -3.10552 | 0.023587 | 0.219649 | -3.37739 |
| NONHSAT210748.1   | -1.07245 | 3.319033 | -3.1055  | 0.023588 | 0.219649 | -3.37742 |
| lnc-MOCS2-5:1     | 1.135487 | 1.912576 | 3.10495  | 0.023603 | 0.21974  | -3.37811 |
| MSTRG.57193.38    | -1.69633 | 3.101688 | -3.10492 | 0.023604 | 0.21974  | -3.37814 |
| T314610           | 1.643245 | 3.115424 | 3.104685 | 0.023611 | 0.219769 | -3.37844 |
| NONHSAT195487.1   | -1.09119 | 2.541237 | -3.10466 | 0.023611 | 0.219769 | -3.37847 |
| T346986           | 1.736484 | 3.957241 | 3.10389  | 0.023633 | 0.219839 | -3.37945 |
| lnc-MAP3K7-4:1    | -1.17062 | 2.026706 | -3.10368 | 0.023639 | 0.219845 | -3.37971 |
| NONHSAT223944.1   | 1.69463  | 3.020646 | 3.102453 | 0.023674 | 0.219977 | -3.38126 |
| NR_122112         | 1.021531 | 3.355021 | 3.102244 | 0.02368  | 0.219977 | -3.38152 |
| lnc-CCDC7-11:1    | 1.516329 | 2.546016 | 3.102114 | 0.023684 | 0.219977 | -3.38169 |
| NONHSAT166707.1   | -1.21804 | 2.707994 | -3.10078 | 0.023722 | 0.220257 | -3.38337 |
| ENST00000615168.4 | -1.22194 | 2.76441  | -3.10075 | 0.023723 | 0.220257 | -3.3834  |
| lnc-P3H2-5:1      | 1.02557  | 1.720198 | 3.099917 | 0.023747 | 0.220401 | -3.38446 |
| NONHSAT180689.1   | 1.077631 | 1.951022 | 3.099792 | 0.02375  | 0.220401 | -3.38462 |
| ENST00000438619.1 | 1.806395 | 2.387339 | 3.099737 | 0.023752 | 0.220401 | -3.38469 |
| MSTRG.59350.1     | -1.26353 | 1.916077 | -3.09966 | 0.023754 | 0.220401 | -3.38479 |
| ENST00000609657.1 | -1.23363 | 3.406983 | -3.09903 | 0.023772 | 0.220473 | -3.38558 |
| NONHSAT183290.1   | 1.199292 | 5.244644 | 3.098378 | 0.023791 | 0.220564 | -3.3864  |
| NONHSAT167788.1   | -1.17525 | 1.832124 | -3.09655 | 0.023843 | 0.220866 | -3.3887  |
| lnc-CTXND2-7:2    | -1.57885 | 3.298004 | -3.09469 | 0.023897 | 0.221039 | -3.39106 |
| lnc-DTWD1-4:1     | -1.40568 | 2.240845 | -3.09454 | 0.023901 | 0.221039 | -3.39125 |
| ENST00000655341.1 | 1.528193 | 1.827585 | 3.094087 | 0.023914 | 0.221098 | -3.39182 |
| MSTRG.29184.1     | -1.15027 | 2.515377 | -3.0938  | 0.023923 | 0.221154 | -3.39218 |
| lnc-CCDC167-2:2   | 1.803187 | 4.548831 | 3.09365  | 0.023927 | 0.221174 | -3.39237 |
| NONHSAT187667.1   | -1.03108 | 2.4415   | -3.09319 | 0.02394  | 0.221226 | -3.39295 |
| ENST00000493033.1 | -1.0588  | 5.754823 | -3.09288 | 0.023949 | 0.221257 | -3.39334 |
| lnc-NCOR2-6:1     | 1.111264 | 2.783563 | 3.091793 | 0.02398  | 0.221365 | -3.39472 |
| MSTRG.71557.1     | -1.01589 | 7.232705 | -3.08966 | 0.024042 | 0.221543 | -3.39741 |
| MSTRG.48020.1     | 1.251892 | 3.724297 | 3.089514 | 0.024047 | 0.221549 | -3.39759 |
| lnc-F8-2:1        | -1.13423 | 2.860259 | -3.089   | 0.024061 | 0.221656 | -3.39824 |
| ENST00000523935.1 | 1.082516 | 2.571631 | 3.087591 | 0.024102 | 0.221881 | -3.40002 |
| NONHSAT215205.1   | 1.750163 | 2.659792 | 3.087228 | 0.024113 | 0.221918 | -3.40048 |
| NONHSAT195407.1   | 2.084672 | 3.402459 | 3.086876 | 0.024123 | 0.221955 | -3.40093 |



|                   |          |          |          |          |          |          |
|-------------------|----------|----------|----------|----------|----------|----------|
| NONHSAT159764.1   | 1.105795 | 2.316403 | 3.085771 | 0.024155 | 0.22214  | -3.40232 |
| MSTRG.2812.2      | -1.01977 | 12.1697  | -3.08572 | 0.024157 | 0.22214  | -3.40239 |
| T160319           | 1.024956 | 2.133688 | 3.085333 | 0.024168 | 0.222154 | -3.40288 |
| lnc-PPIL1-1:1     | -1.34772 | 2.65294  | -3.08524 | 0.024171 | 0.222154 | -3.40299 |
| NONHSAT170153.1   | -1.29145 | 2.751654 | -3.08461 | 0.024189 | 0.222235 | -3.4038  |
| ENST00000636059.1 | 1.421654 | 2.260705 | 3.083955 | 0.024208 | 0.222348 | -3.40462 |
| NONHSAT177097.1   | -1.07222 | 2.901956 | -3.08353 | 0.024221 | 0.222358 | -3.40516 |
| ENST00000542197.1 | 1.726674 | 2.927562 | 3.083334 | 0.024227 | 0.222375 | -3.4054  |
| NONHSAT185574.1   | 1.032008 | 3.234996 | 3.081482 | 0.024281 | 0.22261  | -3.40775 |
| lnc-C3orf80-1:1   | 1.040389 | 1.599003 | 3.080671 | 0.024305 | 0.222734 | -3.40877 |
| lnc-DIO1-1:1      | -1.34081 | 4.154424 | -3.07855 | 0.024367 | 0.22301  | -3.41145 |
| MSTRG.2195.1      | 1.689141 | 2.851705 | 3.078403 | 0.024371 | 0.22301  | -3.41164 |
| MSTRG.16160.1     | 1.150535 | 2.208349 | 3.078352 | 0.024373 | 0.22301  | -3.4117  |
| ENST00000536835.2 | 1.708313 | 3.081153 | 3.078048 | 0.024382 | 0.223036 | -3.41209 |
| lnc-TMEM200B-2:1  | 1.231168 | 1.69088  | 3.076013 | 0.024442 | 0.223334 | -3.41466 |
| NONHSAT187478.1   | -1.22431 | 2.475606 | -3.07554 | 0.024456 | 0.223377 | -3.41526 |
| lnc-ZBTB32-4:1    | 1.236103 | 2.248062 | 3.074838 | 0.024477 | 0.223383 | -3.41615 |
| NONHSAT182897.1   | 1.261235 | 2.159162 | 3.074635 | 0.024483 | 0.223383 | -3.41641 |
| NONHSAT220513.1   | -1.246   | 1.796764 | -3.07425 | 0.024494 | 0.223426 | -3.41689 |
| MSTRG.49527.9     | -1.12815 | 3.210764 | -3.07358 | 0.024514 | 0.223508 | -3.41775 |
| lnc-INHBA-1:2     | 1.430204 | 2.433251 | 3.073574 | 0.024514 | 0.223508 | -3.41775 |
| LINC01792:5       | 1.905309 | 3.447781 | 3.072316 | 0.024551 | 0.223706 | -3.41934 |
| lnc-ALKBH2-3:1    | -1.06523 | 2.292264 | -3.07154 | 0.024574 | 0.223814 | -3.42032 |
| NONHSAT178955.1   | 1.260306 | 2.160097 | 3.070941 | 0.024592 | 0.223916 | -3.42108 |
| NONHSAT219358.1   | 1.023788 | 5.463872 | 3.070181 | 0.024615 | 0.224001 | -3.42204 |
| lnc-MYO3A-2:1     | 1.336022 | 2.214955 | 3.069916 | 0.024623 | 0.224033 | -3.42238 |
| NONHSAT161596.1   | 1.317969 | 1.742376 | 3.066985 | 0.02471  | 0.224277 | -3.42609 |
| NONHSAT175577.1   | 1.847184 | 2.047324 | 3.066562 | 0.024723 | 0.22428  | -3.42663 |
| lnc-MS4A4A-1:1    | 1.748168 | 2.614423 | 3.065792 | 0.024746 | 0.224371 | -3.4276  |
| ENST00000662897.1 | -1.08908 | 2.313275 | -3.06543 | 0.024757 | 0.224371 | -3.42806 |
| ENST00000621331.1 | 1.562656 | 4.217254 | 3.065425 | 0.024757 | 0.224371 | -3.42807 |
| lnc-DHRS2-5:1     | 1.116114 | 2.099328 | 3.064046 | 0.024798 | 0.22441  | -3.42981 |
| NONHSAT198022.1   | 1.243103 | 2.159446 | 3.06358  | 0.024812 | 0.224419 | -3.4304  |
| NONHSAT172098.1   | 1.147342 | 3.291993 | 3.063478 | 0.024815 | 0.224419 | -3.43053 |
| NONHSAT217880.1   | 1.022571 | 1.613753 | 3.063436 | 0.024817 | 0.224419 | -3.43059 |
| lnc-ZNF25-2:1     | 1.988395 | 2.849062 | 3.063197 | 0.024824 | 0.224464 | -3.43089 |
| MSTRG.56045.1     | -1.0678  | 1.916045 | -3.06291 | 0.024832 | 0.224523 | -3.43126 |
| NONHSAT196125.1   | 1.096499 | 4.646613 | 3.062444 | 0.024846 | 0.224568 | -3.43184 |
| ENST00000553732.1 | -1.0603  | 5.583684 | -3.06209 | 0.024857 | 0.224582 | -3.43229 |
| MSTRG.55327.1     | -1.0631  | 3.015343 | -3.06078 | 0.024896 | 0.224762 | -3.43395 |
| ENST00000526041.1 | 1.882793 | 3.755808 | 3.060637 | 0.024901 | 0.224762 | -3.43413 |
| lnc-SIX1-3:1      | 1.309718 | 2.38863  | 3.060623 | 0.024901 | 0.224762 | -3.43415 |
| MSTRG.60097.1     | 1.700666 | 3.489791 | 3.059234 | 0.024943 | 0.22502  | -3.43591 |
| lnc-GPATCH2-8:1   | 1.462368 | 2.914988 | 3.05767  | 0.02499  | 0.225224 | -3.43789 |
| lnc-CROCC-1:6     | 1.413758 | 2.318414 | 3.056911 | 0.025013 | 0.225371 | -3.43885 |
| NONHSAT158335.1   | 1.084584 | 4.307076 | 3.056568 | 0.025024 | 0.225425 | -3.43929 |
| NONHSAT195177.1   | 1.898149 | 2.990877 | 3.055504 | 0.025056 | 0.225426 | -3.44064 |
| lnc-ZNF550-2:1    | -1.1974  | 2.69157  | -3.05472 | 0.02508  | 0.225567 | -3.44163 |

|                   |          |          |          |          |          |          |
|-------------------|----------|----------|----------|----------|----------|----------|
| lnc-DAD1-4:1      | 1.457871 | 2.822519 | 3.053412 | 0.02512  | 0.225664 | -3.44329 |
| ENST00000648788.1 | 1.32841  | 2.587364 | 3.052509 | 0.025147 | 0.22585  | -3.44444 |
| NONHSAT167948.1   | -1.70763 | 3.240131 | -3.052   | 0.025163 | 0.22591  | -3.44509 |
| POC1B-AS1:29      | 1.120089 | 3.822664 | 3.051579 | 0.025176 | 0.225959 | -3.44562 |
| MSTRG.13494.1     | -1.18168 | 2.711228 | -3.05017 | 0.025219 | 0.226008 | -3.4474  |
| NONHSAT218909.1   | 2.255819 | 5.029496 | 3.049294 | 0.025245 | 0.226096 | -3.44852 |
| lnc-AKIRIN1-1:19  | -1.26412 | 3.830162 | -3.0491  | 0.025252 | 0.226096 | -3.44877 |
| FAM99B:5          | -1.28365 | 2.112018 | -3.04835 | 0.025274 | 0.226096 | -3.44971 |
| NR_125936         | -1.37705 | 1.977331 | -3.04825 | 0.025277 | 0.226096 | -3.44984 |
| NONHSAT170374.1   | -1.06996 | 3.825964 | -3.04818 | 0.025279 | 0.226096 | -3.44992 |
| NONHSAT186990.1   | 1.143508 | 1.638401 | 3.048124 | 0.025281 | 0.226096 | -3.45    |
| NONHSAT193268.1   | -1.08132 | 1.901504 | -3.04748 | 0.025301 | 0.226163 | -3.45081 |
| MSTRG.13328.1     | -1.34189 | 3.078655 | -3.04522 | 0.025371 | 0.226446 | -3.45368 |
| MSTRG.52476.1     | 1.519205 | 2.510614 | 3.045141 | 0.025373 | 0.226446 | -3.45379 |
| T345203           | 1.569966 | 5.68922  | 3.04444  | 0.025395 | 0.226453 | -3.45468 |
| NONHSAT177252.1   | -1.02377 | 4.945152 | -3.04439 | 0.025396 | 0.226453 | -3.45474 |
| ENST00000507304.1 | 1.089977 | 1.743039 | 3.044198 | 0.025402 | 0.226485 | -3.45498 |
| lnc-MYO6-9:1      | 1.611037 | 2.982643 | 3.043135 | 0.025435 | 0.226702 | -3.45633 |
| lnc-LRRC9-5:1     | 1.081314 | 3.176767 | 3.042582 | 0.025452 | 0.226829 | -3.45704 |
| T284013           | 1.221557 | 1.715675 | 3.042005 | 0.02547  | 0.226948 | -3.45777 |
| lnc-ZGRF1-9:1     | 1.060693 | 3.278615 | 3.041748 | 0.025478 | 0.226991 | -3.45809 |
| lnc-ZIC1-1:3      | 1.111171 | 1.650833 | 3.040104 | 0.025529 | 0.227291 | -3.46018 |
| lnc-PRPF18-13:1   | 1.470964 | 2.829087 | 3.038544 | 0.025577 | 0.227513 | -3.46216 |
| lnc-CCNH-6:1      | -1.07637 | 3.557079 | -3.03832 | 0.025584 | 0.227513 | -3.46245 |
| ENST00000484703.1 | 1.100272 | 1.58749  | 3.037286 | 0.025616 | 0.227648 | -3.46376 |
| lnc-TLE4-12:4     | 1.18494  | 3.179342 | 3.03652  | 0.02564  | 0.227701 | -3.46473 |
| lnc-IFNAR1-1:1    | 1.141388 | 2.73347  | 3.036491 | 0.025641 | 0.227701 | -3.46477 |
| lnc-SLC35G2-1:9   | 1.032462 | 3.939156 | 3.036432 | 0.025643 | 0.227701 | -3.46485 |
| MSTRG.14197.1     | 1.010147 | 5.716472 | 3.036157 | 0.025651 | 0.22774  | -3.46519 |
| lnc-LRRTM1-14:1   | -1.45309 | 3.466685 | -3.03363 | 0.02573  | 0.227931 | -3.46841 |
| NONHSAT155153.1   | 1.399357 | 2.788996 | 3.033533 | 0.025733 | 0.227931 | -3.46853 |
| lnc-COX11-3:1     | -1.22792 | 3.452296 | -3.03342 | 0.025737 | 0.227931 | -3.46868 |
| NONHSAT221961.1   | 1.91721  | 2.054844 | 3.030996 | 0.025813 | 0.22826  | -3.47175 |
| NONHSAT210535.1   | 2.027965 | 3.499275 | 3.030939 | 0.025814 | 0.22826  | -3.47183 |
| NONHSAT168402.1   | 1.317761 | 1.788385 | 3.030011 | 0.025844 | 0.228422 | -3.47301 |
| ENST00000563063.1 | 1.560733 | 2.932413 | 3.029804 | 0.02585  | 0.228423 | -3.47327 |
| lnc-CDHR3-1:6     | 1.330056 | 2.295725 | 3.029036 | 0.025874 | 0.228546 | -3.47425 |
| lnc-ATP6AP2-5:1   | -2.51244 | 3.904095 | -3.02899 | 0.025876 | 0.228546 | -3.47431 |
| lnc-SLITRK6-2:1   | 1.241782 | 1.901629 | 3.028767 | 0.025883 | 0.228587 | -3.47459 |
| lnc-FGF8-2:1      | -1.71075 | 2.94239  | -3.02737 | 0.025927 | 0.228745 | -3.47637 |
| ENST00000391437.2 | 1.03077  | 2.141897 | 3.027253 | 0.02593  | 0.228745 | -3.47651 |
| lnc-FAM84B-3:1    | -1.44289 | 3.016115 | -3.02702 | 0.025938 | 0.228773 | -3.47681 |
| NONHSAT215024.1   | -1.22218 | 2.255056 | -3.02617 | 0.025964 | 0.228849 | -3.47788 |
| ENST00000580311.1 | 1.113148 | 1.99358  | 3.02607  | 0.025968 | 0.228849 | -3.47802 |
| NONHSAT194730.1   | -1.10571 | 4.754583 | -3.02523 | 0.025994 | 0.229008 | -3.47908 |
| MSTRG.55287.1     | -1.3783  | 2.21789  | -3.02489 | 0.026005 | 0.229013 | -3.47952 |
| ENST00000655075.1 | 1.174403 | 2.649452 | 3.02364  | 0.026045 | 0.229204 | -3.48111 |
| ENST00000609313.1 | 1.897721 | 2.862723 | 3.023595 | 0.026046 | 0.229204 | -3.48117 |

|                   |          |          |          |          |          |          |
|-------------------|----------|----------|----------|----------|----------|----------|
| ENST00000382488.2 | -1.34445 | 3.024434 | -3.02259 | 0.026078 | 0.229347 | -3.48245 |
| lnc-SLC46A3-1:1   | 1.011951 | 4.48432  | 3.021736 | 0.026105 | 0.229497 | -3.48353 |
| NONHSAT205054.1   | -1.29277 | 2.819913 | -3.02162 | 0.026109 | 0.229497 | -3.48367 |
| NONHSAT177810.1   | -1.2833  | 2.523503 | -3.02115 | 0.026124 | 0.229498 | -3.48428 |
| NONHSAT217255.1   | 1.80565  | 2.423591 | 3.021111 | 0.026125 | 0.229498 | -3.48433 |
| NR_037694         | 1.754118 | 2.792291 | 3.020922 | 0.026131 | 0.229513 | -3.48457 |
| NONHSAT197652.1   | 1.181598 | 2.006853 | 3.019396 | 0.026179 | 0.229779 | -3.48651 |
| NONHSAT154316.1   | -1.16575 | 3.253054 | -3.01796 | 0.026225 | 0.229894 | -3.48833 |
| lnc-TP53TG3-64:1  | -1.04433 | 4.229807 | -3.01786 | 0.026228 | 0.229894 | -3.48846 |
| NONHSAT197956.1   | 1.373351 | 2.621664 | 3.017817 | 0.02623  | 0.229894 | -3.48852 |
| lnc-CHST4-1:5     | 1.236004 | 2.124675 | 3.017095 | 0.026253 | 0.229978 | -3.48944 |
| NONHSAT178503.1   | -1.1986  | 2.583913 | -3.01682 | 0.026262 | 0.229978 | -3.48979 |
| NR_125955         | -1.08787 | 2.097065 | -3.01657 | 0.02627  | 0.229978 | -3.4901  |
| MSTRG.53117.1     | 1.13437  | 3.109315 | 3.01599  | 0.026288 | 0.229988 | -3.49085 |
| lnc-NFAT5-5:1     | 1.161115 | 2.075618 | 3.015939 | 0.02629  | 0.229988 | -3.49091 |
| T341075           | -1.68121 | 3.012832 | -3.01546 | 0.026305 | 0.230036 | -3.49152 |
| NONHSAT214270.1   | -1.09552 | 6.967484 | -3.01448 | 0.026337 | 0.230154 | -3.49277 |
| ENST00000612739.1 | -1.28281 | 4.489452 | -3.0141  | 0.026349 | 0.230169 | -3.49326 |
| lnc-MAP9-8:1      | -1.05369 | 14.1134  | -3.01382 | 0.026358 | 0.230203 | -3.49361 |
| lnc-PGPEP1L-19:1  | -1.15861 | 2.682324 | -3.01238 | 0.026404 | 0.230421 | -3.49544 |
| MSTRG.50652.2     | -1.22175 | 2.341433 | -3.01099 | 0.026449 | 0.230645 | -3.49722 |
| lnc-PAX9-7:1      | 1.184335 | 1.621499 | 3.010773 | 0.026456 | 0.230645 | -3.49749 |
| T158189           | 1.921063 | 2.368075 | 3.008798 | 0.02652  | 0.230881 | -3.50001 |
| lnc-COL28A1-1:18  | 1.173081 | 2.247846 | 3.00842  | 0.026532 | 0.230926 | -3.50049 |
| NONHSAT194244.1   | 1.303479 | 2.134505 | 3.008176 | 0.02654  | 0.23093  | -3.5008  |
| lnc-MAS1L-1:1     | 1.141704 | 2.366409 | 3.00726  | 0.026569 | 0.231092 | -3.50197 |
| NONHSAT212341.1   | 1.066074 | 4.327207 | 3.007047 | 0.026576 | 0.23111  | -3.50224 |
| NONHSAT153852.1   | -1.37689 | 1.947693 | -3.00681 | 0.026584 | 0.231116 | -3.50254 |
| lnc-PFKP-36:2     | -1.25978 | 2.469906 | -3.00639 | 0.026597 | 0.23116  | -3.50307 |
| ENST00000657137.1 | 1.798912 | 3.364999 | 3.00575  | 0.026618 | 0.231236 | -3.50389 |
| NONHSAT179044.1   | 1.074416 | 2.399817 | 3.005164 | 0.026637 | 0.231312 | -3.50464 |
| NONHSAT187600.1   | -1.00316 | 2.121071 | -3.005   | 0.026643 | 0.231329 | -3.50485 |
| NONHSAT160508.1   | -1.15167 | 2.345303 | -3.0046  | 0.026656 | 0.231411 | -3.50536 |
| NONHSAT187608.1   | 1.063338 | 6.294171 | 3.004212 | 0.026668 | 0.231411 | -3.50585 |
| ENST00000417838.1 | -1.1518  | 2.066357 | -3.00321 | 0.026701 | 0.231544 | -3.50712 |
| T262078           | -1.2165  | 3.703953 | -3.00321 | 0.026701 | 0.231544 | -3.50713 |
| NONHSAT171951.1   | -1.44697 | 2.170928 | -3.00318 | 0.026702 | 0.231544 | -3.50717 |
| MSTRG.27546.1     | -1.15532 | 2.660203 | -3.00248 | 0.026725 | 0.231663 | -3.50806 |
| LINC01473:10      | 1.307804 | 2.630471 | 3.002452 | 0.026726 | 0.231663 | -3.50809 |
| MSTRG.67367.1     | -1.19398 | 9.585859 | -3.00047 | 0.02679  | 0.231952 | -3.51062 |
| NONHSAT159000.1   | -1.03399 | 2.78485  | -2.99859 | 0.026852 | 0.232145 | -3.51302 |
| MSTRG.19205.1     | -1.36946 | 2.718959 | -2.99831 | 0.026861 | 0.232164 | -3.51337 |
| NONHSAT204340.1   | 1.047728 | 1.952424 | 2.997572 | 0.026885 | 0.232239 | -3.51432 |
| NONHSAT198795.1   | -1.40314 | 1.936458 | -2.99694 | 0.026906 | 0.23237  | -3.51513 |
| NONHSAT188044.1   | 1.532255 | 1.847367 | 2.996892 | 0.026908 | 0.23237  | -3.51519 |
| SATB2-AS1:11      | 1.015467 | 2.936626 | 2.996655 | 0.026915 | 0.232395 | -3.51549 |
| lnc-CDY1B-4:1     | -1.20671 | 5.90254  | -2.99614 | 0.026932 | 0.232423 | -3.51615 |
| NONHSAT167574.1   | 1.315873 | 2.553926 | 2.994745 | 0.026978 | 0.232569 | -3.51792 |

|                   |          |          |          |          |          |          |
|-------------------|----------|----------|----------|----------|----------|----------|
| MSTRG.21381.1     | 1.370498 | 1.756007 | 2.993662 | 0.027014 | 0.232627 | -3.51931 |
| ENST00000668609.1 | 1.480298 | 1.878601 | 2.993487 | 0.02702  | 0.232627 | -3.51953 |
| ENST00000354425.4 | -1.18957 | 4.378343 | -2.9931  | 0.027032 | 0.232627 | -3.52002 |
| lnc-RTL4-4:1      | 1.024235 | 2.256809 | 2.993058 | 0.027034 | 0.232627 | -3.52008 |
| lnc-FH-1:1        | 1.434955 | 3.748322 | 2.992942 | 0.027038 | 0.232627 | -3.52023 |
| ENST00000477392.1 | -1.25923 | 2.707931 | -2.99198 | 0.027069 | 0.232745 | -3.52145 |
| ENST00000644259.1 | 1.696372 | 2.375363 | 2.991747 | 0.027077 | 0.232775 | -3.52175 |
| T305520           | -1.33844 | 2.662234 | -2.99149 | 0.027086 | 0.232828 | -3.52208 |
| NONHSAT189424.1   | -1.40902 | 2.354673 | -2.98959 | 0.027149 | 0.233085 | -3.52451 |
| NONHSAT157022.1   | -1.21592 | 2.110433 | -2.98895 | 0.02717  | 0.233096 | -3.52533 |
| lnc-SCGB1C2-11:1  | 1.206504 | 1.710823 | 2.988807 | 0.027175 | 0.233096 | -3.5255  |
| MSTRG.2071.1      | 1.032574 | 1.571218 | 2.988672 | 0.027179 | 0.233096 | -3.52568 |
| MSTRG.59421.1     | 1.498548 | 2.366086 | 2.987726 | 0.027211 | 0.233239 | -3.52688 |
| NONHSAT165018.1   | 1.064286 | 1.874771 | 2.987537 | 0.027217 | 0.23324  | -3.52713 |
| lnc-MTA3-11:1     | -1.67257 | 5.065262 | -2.98619 | 0.027262 | 0.233466 | -3.52885 |
| lnc-COPS8-4:4     | -1.34581 | 2.337332 | -2.98599 | 0.027268 | 0.233483 | -3.5291  |
| NONHSAT201221.1   | 1.575089 | 1.852255 | 2.98545  | 0.027286 | 0.233545 | -3.52979 |
| lnc-SP8-2:1       | 1.18415  | 3.845213 | 2.985425 | 0.027287 | 0.233545 | -3.52982 |
| ENST00000609599.1 | -1.15002 | 4.526627 | -2.98451 | 0.027318 | 0.233667 | -3.53099 |
| MSTRG.46638.1     | -1.39126 | 2.336543 | -2.98362 | 0.027347 | 0.23379  | -3.53213 |
| NONHSAT199003.1   | 1.059962 | 2.765027 | 2.983157 | 0.027363 | 0.233839 | -3.53272 |
| lnc-CYP7B1-10:1   | 1.004552 | 4.661844 | 2.981483 | 0.027419 | 0.234197 | -3.53486 |
| NONHSAT205257.1   | -1.66411 | 2.506722 | -2.98083 | 0.027441 | 0.234246 | -3.5357  |
| lnc-CNTNAP2-3:2   | 1.138587 | 4.299724 | 2.979874 | 0.027473 | 0.23442  | -3.53691 |
| MSTRG.53632.17    | 1.198009 | 2.100729 | 2.976951 | 0.027572 | 0.23472  | -3.54065 |
| ENST00000582692.2 | -1.28095 | 1.775743 | -2.97684 | 0.027575 | 0.23472  | -3.54079 |
| ENST00000509924.3 | 1.187298 | 7.114083 | 2.976369 | 0.027591 | 0.234791 | -3.54139 |
| NONHSAT223713.1   | -1.19406 | 3.36514  | -2.9759  | 0.027607 | 0.234885 | -3.54199 |
| MSTRG.48590.1     | 1.337697 | 2.305409 | 2.975656 | 0.027615 | 0.234937 | -3.54231 |
| NONHSAT154209.1   | 1.183464 | 2.737711 | 2.975506 | 0.02762  | 0.23494  | -3.5425  |
| NONHSAT198775.1   | 1.148866 | 4.42981  | 2.975024 | 0.027637 | 0.235026 | -3.54311 |
| lnc-ADAMTS10-1:1  | -1.27697 | 2.216714 | -2.97487 | 0.027642 | 0.235026 | -3.54331 |
| MSTRG.4065.1      | -1.08876 | 1.705699 | -2.9748  | 0.027644 | 0.235026 | -3.5434  |
| lnc-ZNF649-3:6    | -1.4704  | 2.356868 | -2.97411 | 0.027668 | 0.235164 | -3.54428 |
| NONHSAT214840.1   | 1.640191 | 3.69502  | 2.973589 | 0.027685 | 0.235232 | -3.54495 |
| NR_028471         | -1.53792 | 5.083374 | -2.97339 | 0.027692 | 0.235232 | -3.5452  |
| MSTRG.71368.1     | 1.709289 | 3.119367 | 2.972021 | 0.027738 | 0.23538  | -3.54695 |
| MSTRG.49845.3     | 1.459117 | 3.676321 | 2.97179  | 0.027746 | 0.23538  | -3.54725 |
| lnc-PRKCH-1:1     | 1.569848 | 2.12774  | 2.971665 | 0.02775  | 0.23538  | -3.54741 |
| lnc-EPHA6-4:1     | -1.59925 | 2.346018 | -2.97103 | 0.027772 | 0.235384 | -3.54822 |
| NONHSAT193956.1   | 1.123348 | 1.94375  | 2.97087  | 0.027778 | 0.235384 | -3.54843 |
| NONHSAT206072.1   | 1.847879 | 2.615978 | 2.970247 | 0.027799 | 0.235441 | -3.54922 |
| MSTRG.18248.1     | 1.428464 | 3.596039 | 2.970191 | 0.027801 | 0.235441 | -3.54929 |
| ENST00000625073.1 | 1.101837 | 1.639427 | 2.969425 | 0.027827 | 0.235507 | -3.55027 |
| NONHSAT184962.1   | -1.32624 | 3.300978 | -2.96843 | 0.027861 | 0.23552  | -3.55155 |
| NONHSAT185528.1   | 1.080543 | 3.109733 | 2.967814 | 0.027882 | 0.23552  | -3.55233 |
| ENST00000560446.1 | 1.552971 | 2.428141 | 2.967502 | 0.027892 | 0.23552  | -3.55273 |
| T285360           | 1.874684 | 3.323869 | 2.966872 | 0.027914 | 0.23552  | -3.55354 |

|                   |          |          |          |          |          |          |
|-------------------|----------|----------|----------|----------|----------|----------|
| ENST00000567718.1 | 1.343584 | 2.108761 | 2.966867 | 0.027914 | 0.23552  | -3.55355 |
| ENST00000419766.5 | 1.138766 | 3.275234 | 2.966338 | 0.027932 | 0.23552  | -3.55422 |
| lnc-SH3BGR-5:1    | 1.206234 | 2.108012 | 2.966318 | 0.027933 | 0.23552  | -3.55425 |
| NONHSAT221816.1   | 1.448404 | 3.192867 | 2.965876 | 0.027948 | 0.235566 | -3.55481 |
| ENST00000649638.1 | 1.604241 | 1.881597 | 2.965062 | 0.027976 | 0.235571 | -3.55586 |
| lnc-INHBB-2:1     | 1.012142 | 3.018522 | 2.964932 | 0.02798  | 0.235571 | -3.55602 |
| lnc-XRCC2-12:2    | 1.273635 | 2.662246 | 2.9648   | 0.027985 | 0.235571 | -3.55619 |
| NONHSAT173891.1   | 2.116531 | 3.376902 | 2.963561 | 0.028027 | 0.235742 | -3.55778 |
| lnc-IFIH1-1:1     | -1.10821 | 2.480821 | -2.96344 | 0.028032 | 0.235742 | -3.55794 |
| lnc-SUCO-1:1      | -1.02209 | 4.378235 | -2.9632  | 0.02804  | 0.235785 | -3.55825 |
| NONHSAT154642.1   | 1.046034 | 2.500025 | 2.962607 | 0.02806  | 0.235837 | -3.559   |
| ENST00000645181.1 | 1.262565 | 1.703298 | 2.961122 | 0.028111 | 0.236014 | -3.5609  |
| lnc-NEURL1B-3:7   | 1.648498 | 7.174581 | 2.961067 | 0.028113 | 0.236014 | -3.56097 |
| NONHSAT197937.1   | -1.51067 | 4.33487  | -2.9607  | 0.028126 | 0.236077 | -3.56144 |
| ENST00000657981.1 | 2.03651  | 3.88345  | 2.96047  | 0.028134 | 0.236101 | -3.56173 |
| lnc-TLE3-11:1     | 1.50018  | 2.685506 | 2.957931 | 0.028222 | 0.236357 | -3.56499 |
| NONHSAT148743.1   | -1.11032 | 4.002347 | -2.95777 | 0.028227 | 0.236357 | -3.56519 |
| lnc-TC2N-1:2      | -1.49636 | 4.471618 | -2.95751 | 0.028236 | 0.236357 | -3.56552 |
| CEBPA-DT:14       | -1.06608 | 2.471837 | -2.95672 | 0.028264 | 0.236464 | -3.56654 |
| NONHSAT215077.1   | -1.36198 | 2.389994 | -2.95625 | 0.02828  | 0.236532 | -3.56714 |
| NONHSAT168514.1   | 1.088606 | 2.00959  | 2.955482 | 0.028306 | 0.236591 | -3.56812 |
| lnc-FOPNL-3:1     | 1.4144   | 3.252676 | 2.955329 | 0.028312 | 0.236591 | -3.56832 |
| lnc-UXS1-7:1      | -1.08214 | 1.669494 | -2.95515 | 0.028318 | 0.236604 | -3.56855 |
| ENST00000426218.1 | 2.193178 | 4.061578 | 2.954905 | 0.028326 | 0.236616 | -3.56886 |
| lnc-RTP5-5:4      | 1.044772 | 4.322482 | 2.953919 | 0.028361 | 0.236744 | -3.57012 |
| lnc-GCG-3:1       | 1.049541 | 3.561587 | 2.95355  | 0.028374 | 0.236744 | -3.5706  |
| lnc-SPRTN-2:1     | 1.651571 | 3.437357 | 2.95338  | 0.02838  | 0.236745 | -3.57082 |
| NONHSAT191639.1   | 1.474754 | 2.354558 | 2.952535 | 0.028409 | 0.23689  | -3.5719  |
| NONHSAT201300.1   | -1.55053 | 3.889728 | -2.95221 | 0.02842  | 0.23689  | -3.57232 |
| MSTRG.43224.4     | 1.93934  | 3.175362 | 2.950461 | 0.028481 | 0.237091 | -3.57456 |
| NONHSAT161323.1   | 1.465171 | 2.537989 | 2.949661 | 0.028509 | 0.237116 | -3.57558 |
| lnc-RIPK4-4:1     | 1.147671 | 4.507645 | 2.948602 | 0.028546 | 0.237176 | -3.57694 |
| T162607           | -1.09849 | 3.894555 | -2.94811 | 0.028564 | 0.237243 | -3.57758 |
| NONHSAT205439.1   | -1.07734 | 2.413719 | -2.94568 | 0.028649 | 0.237509 | -3.58069 |
| NONHSAT162135.1   | 1.55987  | 2.079101 | 2.945068 | 0.028671 | 0.237562 | -3.58147 |
| NONHSAT193073.1   | 1.388078 | 2.99261  | 2.944623 | 0.028686 | 0.237672 | -3.58204 |
| NONHSAT150141.1   | 1.334521 | 2.95968  | 2.94413  | 0.028704 | 0.237735 | -3.58267 |
| ENST00000614815.1 | -1.25585 | 2.88727  | -2.94396 | 0.02871  | 0.237735 | -3.58289 |
| NONHSAT172924.1   | -1.30623 | 1.927995 | -2.94365 | 0.028721 | 0.237735 | -3.58329 |
| MSTRG.19434.1     | -1.39879 | 2.345964 | -2.94338 | 0.02873  | 0.237753 | -3.58364 |
| MSTRG.34381.11    | 1.411352 | 3.403291 | 2.943272 | 0.028734 | 0.237755 | -3.58377 |
| lnc-UBN2-1:1      | -1.43495 | 2.070919 | -2.94294 | 0.028746 | 0.237812 | -3.5842  |
| MSTRG.3006.1      | 1.111876 | 1.756814 | 2.942379 | 0.028766 | 0.237918 | -3.58492 |
| NONHSAT208397.1   | 1.391879 | 2.129696 | 2.941889 | 0.028783 | 0.237983 | -3.58555 |
| NONHSAT178033.1   | -1.58461 | 3.466666 | -2.94119 | 0.028808 | 0.238099 | -3.58645 |
| T315345           | 2.302575 | 4.123938 | 2.941059 | 0.028812 | 0.238109 | -3.58661 |
| MSTRG.45326.1     | -1.10423 | 3.218433 | -2.94078 | 0.028822 | 0.238151 | -3.58697 |
| NONHSAT211514.1   | -1.11974 | 2.68628  | -2.94064 | 0.028827 | 0.238151 | -3.58715 |

|                   |          |          |          |          |          |          |
|-------------------|----------|----------|----------|----------|----------|----------|
| ENST00000413943.1 | 1.663782 | 2.278028 | 2.939868 | 0.028854 | 0.238223 | -3.58814 |
| lnc-PPP4R3C-2:2   | -1.40835 | 2.687964 | -2.93886 | 0.02889  | 0.238338 | -3.58944 |
| NONHSAT185039.1   | -1.72228 | 3.228635 | -2.93868 | 0.028897 | 0.238346 | -3.58966 |
| NONHSAT197709.1   | -1.34944 | 1.788993 | -2.93843 | 0.028905 | 0.238391 | -3.58998 |
| NONHSAT190492.1   | 1.365907 | 3.31744  | 2.937924 | 0.028923 | 0.238471 | -3.59063 |
| ENST00000655303.1 | 1.126996 | 5.306275 | 2.937267 | 0.028947 | 0.238537 | -3.59148 |
| MSTRG.69815.1     | 1.063451 | 4.679113 | 2.936935 | 0.028959 | 0.238609 | -3.5919  |
| NONHSAT214691.1   | -1.31145 | 3.913191 | -2.93646 | 0.028976 | 0.238609 | -3.59251 |
| MSTRG.2395.1      | 1.380966 | 1.811045 | 2.936433 | 0.028977 | 0.238609 | -3.59255 |
| NONHSAT162615.1   | -1.0292  | 3.958922 | -2.93582 | 0.028998 | 0.238697 | -3.59333 |
| NONHSAT149602.1   | -1.56762 | 7.442177 | -2.93536 | 0.029015 | 0.238765 | -3.59392 |
| NONHSAT215392.1   | -1.04132 | 2.681555 | -2.93515 | 0.029022 | 0.238766 | -3.59419 |
| NONHSAT154432.1   | 1.241671 | 3.832698 | 2.93441  | 0.029049 | 0.238886 | -3.59514 |
| NONHSAT161631.1   | -1.22874 | 3.0413   | -2.93376 | 0.029072 | 0.238978 | -3.59597 |
| NONHSAT219896.1   | -1.24674 | 2.376528 | -2.93325 | 0.02909  | 0.238978 | -3.59664 |
| ENST00000658071.1 | 1.302598 | 2.923482 | 2.93318  | 0.029093 | 0.238978 | -3.59672 |
| MSTRG.14101.1     | 1.015771 | 3.632526 | 2.932886 | 0.029103 | 0.239022 | -3.5971  |
| ENST00000602530.1 | 1.073422 | 4.16472  | 2.932469 | 0.029118 | 0.239065 | -3.59764 |
| NONHSAT215133.1   | 1.223738 | 3.141784 | 2.932422 | 0.02912  | 0.239065 | -3.5977  |
| ENST00000529314.2 | 1.03195  | 3.541401 | 2.93242  | 0.02912  | 0.239065 | -3.5977  |
| lnc-BMP6-15:1     | -1.23977 | 2.101031 | -2.93177 | 0.029143 | 0.239123 | -3.59853 |
| lnc-NT5C2-2:1     | 1.716552 | 2.368581 | 2.931252 | 0.029162 | 0.239214 | -3.5992  |
| lnc-GRM4-2:2      | -1.01418 | 2.281127 | -2.93057 | 0.029186 | 0.239278 | -3.60007 |
| lnc-ROPN1B-5:1    | -1.2546  | 2.566648 | -2.92673 | 0.029325 | 0.239747 | -3.605   |
| ENST00000418282.2 | 1.594229 | 1.8894   | 2.926551 | 0.029331 | 0.239747 | -3.60524 |
| NONHSAT199836.1   | 1.34004  | 1.730299 | 2.925351 | 0.029374 | 0.239938 | -3.60678 |
| lnc-RPS13-2:1     | -1.16771 | 2.612402 | -2.92454 | 0.029404 | 0.240036 | -3.60782 |
| NONHSAT182664.1   | -1.16983 | 2.879602 | -2.92451 | 0.029405 | 0.240036 | -3.60786 |
| NONHSAT222896.1   | 1.848008 | 2.924878 | 2.922615 | 0.029474 | 0.240345 | -3.61029 |
| NONHSAT152675.1   | 1.624952 | 2.489224 | 2.920392 | 0.029554 | 0.24062  | -3.61315 |
| MSTRG.50712.1     | -1.02732 | 3.214962 | -2.91852 | 0.029623 | 0.240802 | -3.61556 |
| NONHSAT169420.1   | 1.479341 | 2.551332 | 2.917904 | 0.029645 | 0.240823 | -3.61635 |
| MSTRG.19790.6     | -1.40623 | 2.248004 | -2.91766 | 0.029654 | 0.240823 | -3.61666 |
| NONHSAT199666.1   | -1.36923 | 2.434358 | -2.91662 | 0.029692 | 0.240989 | -3.618   |
| lnc-SIRT1-7:1     | -1.25409 | 3.182005 | -2.91589 | 0.029719 | 0.241049 | -3.61894 |
| NONHSAT219291.1   | 1.583221 | 2.473402 | 2.915433 | 0.029736 | 0.241057 | -3.61953 |
| T264682           | 1.885861 | 2.397444 | 2.914896 | 0.029755 | 0.241174 | -3.62021 |
| MSTRG.35264.1     | 1.208182 | 3.729415 | 2.913355 | 0.029812 | 0.241385 | -3.6222  |
| MSTRG.51958.1     | 1.260499 | 2.512106 | 2.912882 | 0.029829 | 0.241483 | -3.62281 |
| NONHSAT156649.1   | 1.630444 | 2.505234 | 2.911737 | 0.029871 | 0.241653 | -3.62428 |
| ENST00000501718.2 | -1.11514 | 1.998637 | -2.91167 | 0.029874 | 0.241653 | -3.62436 |
| MSTRG.51564.1     | 1.500492 | 1.843877 | 2.910911 | 0.029902 | 0.241783 | -3.62534 |
| NONHSAT163896.1   | -1.04292 | 2.150228 | -2.9092  | 0.029965 | 0.241984 | -3.62755 |
| NONHSAT187082.1   | -1.04959 | 3.553819 | -2.9089  | 0.029976 | 0.242021 | -3.62792 |
| lnc-SRPK2-10:1    | 1.492126 | 2.928439 | 2.908232 | 0.030001 | 0.242099 | -3.62879 |
| MSTRG.8490.1      | -1.01872 | 3.632668 | -2.90655 | 0.030063 | 0.242369 | -3.63095 |
| MSTRG.33899.1     | 1.00615  | 5.067882 | 2.905895 | 0.030088 | 0.242506 | -3.6318  |
| lnc-DENND1A-6:1   | 1.078322 | 1.623688 | 2.905231 | 0.030112 | 0.242552 | -3.63265 |

|                   |          |          |          |          |          |          |
|-------------------|----------|----------|----------|----------|----------|----------|
| NONHSAT211981.1   | 1.323607 | 4.340739 | 2.90484  | 0.030127 | 0.24259  | -3.63315 |
| lnc-PROX1-3:1     | 1.131569 | 3.10997  | 2.904333 | 0.030146 | 0.242677 | -3.63381 |
| lnc-PMAIP1-8:1    | 1.060437 | 3.568138 | 2.90415  | 0.030152 | 0.242677 | -3.63404 |
| ENST00000515414.1 | -1.22921 | 2.06285  | -2.90382 | 0.030165 | 0.242677 | -3.63447 |
| NONHSAT205745.1   | -1.22633 | 5.968484 | -2.90373 | 0.030168 | 0.242677 | -3.63458 |
| lnc-RNF113B-6:1   | -1.54518 | 2.155015 | -2.90372 | 0.030168 | 0.242677 | -3.63459 |
| T376261           | -1.12844 | 2.32587  | -2.90334 | 0.030183 | 0.242677 | -3.63508 |
| NONHSAT222013.1   | 1.493463 | 2.271201 | 2.903262 | 0.030185 | 0.242677 | -3.63518 |
| lnc-TMEM35A-1:1   | 1.477262 | 2.676129 | 2.903259 | 0.030186 | 0.242677 | -3.63519 |
| MSTRG.28361.3     | 1.211409 | 2.31748  | 2.903018 | 0.030195 | 0.242703 | -3.6355  |
| NR_125985         | 1.404478 | 2.650932 | 2.902452 | 0.030216 | 0.242802 | -3.63623 |
| NONHSAT157929.1   | 1.289805 | 2.942755 | 2.90055  | 0.030287 | 0.243082 | -3.63868 |
| lnc-KLF15-3:1     | -1.18757 | 2.05045  | -2.89956 | 0.030324 | 0.243161 | -3.63995 |
| NONHSAT222062.1   | 1.165142 | 2.066195 | 2.899513 | 0.030326 | 0.243161 | -3.64001 |
| lnc-MSR1-7:1      | 1.660771 | 2.471337 | 2.898836 | 0.030351 | 0.243225 | -3.64088 |
| NONHSAT200732.1   | 1.254798 | 1.780861 | 2.897715 | 0.030393 | 0.243408 | -3.64233 |
| NONHSAT170265.1   | 1.251232 | 2.248547 | 2.897593 | 0.030398 | 0.243408 | -3.64249 |
| NONHSAT205340.1   | 1.115821 | 2.11801  | 2.897161 | 0.030414 | 0.243443 | -3.64304 |
| ENST00000568714.2 | -1.49525 | 2.734293 | -2.89539 | 0.03048  | 0.243674 | -3.64532 |
| MSTRG.7456.1      | -1.21266 | 2.348777 | -2.89304 | 0.030569 | 0.244026 | -3.64835 |
| lnc-CCND1-2:1     | 1.192667 | 3.349943 | 2.892467 | 0.030591 | 0.244142 | -3.64909 |
| NONHSAT196746.1   | 1.240702 | 4.022576 | 2.892243 | 0.030599 | 0.244191 | -3.64938 |
| ENST00000417612.1 | -1.53235 | 3.60225  | -2.89154 | 0.030626 | 0.244201 | -3.65028 |
| MSTRG.62695.1     | 1.602872 | 2.337332 | 2.891345 | 0.030633 | 0.244201 | -3.65054 |
| lnc-KLF9-4:1      | -1.25443 | 3.506657 | -2.89064 | 0.03066  | 0.244245 | -3.65145 |
| NONHSAT169336.1   | -1.24315 | 2.351379 | -2.89053 | 0.030664 | 0.244245 | -3.65159 |
| NONHSAT183216.1   | -1.10792 | 3.427801 | -2.88961 | 0.030699 | 0.24433  | -3.65277 |
| lnc-GOLGA8S-2:1   | -1.16994 | 2.221045 | -2.8891  | 0.030719 | 0.244388 | -3.65343 |
| lnc-FECH-4:2      | -1.40054 | 2.813275 | -2.88779 | 0.030768 | 0.244571 | -3.65512 |
| IL10RB-DT:15      | -1.16603 | 4.65373  | -2.88747 | 0.03078  | 0.244592 | -3.65553 |
| NONHSAT204516.1   | -1.63838 | 3.070057 | -2.88711 | 0.030794 | 0.244626 | -3.656   |
| ENST00000500525.1 | -1.21098 | 3.194088 | -2.88675 | 0.030808 | 0.244673 | -3.65646 |
| MSTRG.34252.1     | 1.366564 | 1.747551 | 2.886467 | 0.030819 | 0.244721 | -3.65682 |
| lnc-SH2D1B-5:2    | 1.085926 | 1.718273 | 2.885654 | 0.03085  | 0.244832 | -3.65787 |
| ENST00000253848.3 | -1.11684 | 2.070831 | -2.88548 | 0.030856 | 0.244859 | -3.6581  |
| ENST00000656662.1 | -1.19889 | 8.000008 | -2.88414 | 0.030907 | 0.244967 | -3.65982 |
| NONHSAT162403.1   | 1.614045 | 2.490711 | 2.883552 | 0.03093  | 0.244992 | -3.66058 |
| lnc-EXD1-2:1      | 1.019186 | 2.135673 | 2.881584 | 0.031005 | 0.245283 | -3.66312 |
| MSTRG.14835.2     | -1.08485 | 2.071127 | -2.8811  | 0.031024 | 0.245283 | -3.66374 |
| lnc-HAAO-7:2      | 1.248637 | 2.060268 | 2.88074  | 0.031038 | 0.245323 | -3.66421 |
| MSTRG.29561.1     | 1.204814 | 1.710529 | 2.880081 | 0.031063 | 0.245464 | -3.66506 |
| NONHSAT177657.1   | 1.019714 | 1.873235 | 2.879447 | 0.031087 | 0.245531 | -3.66588 |
| ENST00000659930.1 | 1.201959 | 2.941703 | 2.879328 | 0.031092 | 0.245531 | -3.66603 |
| lnc-ADGRL2-5:2    | 1.730233 | 2.875787 | 2.879083 | 0.031101 | 0.245556 | -3.66635 |
| lnc-TSEN15-5:1    | 1.239298 | 1.920297 | 2.878692 | 0.031117 | 0.245636 | -3.66685 |
| lnc-C4orf47-1:1   | 1.033876 | 2.070823 | 2.878338 | 0.03113  | 0.245719 | -3.66731 |
| lnc-ZNF100-8:1    | 1.38706  | 4.051272 | 2.878224 | 0.031135 | 0.245719 | -3.66746 |
| NONHSAT169394.1   | 1.469196 | 2.284825 | 2.877858 | 0.031149 | 0.245736 | -3.66793 |

|                   |          |          |          |          |          |          |
|-------------------|----------|----------|----------|----------|----------|----------|
| lnc-RGS18-9:1     | 1.136496 | 3.359552 | 2.877679 | 0.031156 | 0.245771 | -3.66816 |
| MSTRG.12641.2     | 1.117371 | 2.440173 | 2.877545 | 0.031161 | 0.245771 | -3.66833 |
| MSTRG.16812.3     | 1.036795 | 1.75094  | 2.87724  | 0.031173 | 0.245809 | -3.66873 |
| ENST00000664102.1 | 1.075747 | 2.662806 | 2.876144 | 0.031215 | 0.245899 | -3.67014 |
| lnc-RAD23B-12:1   | 2.57588  | 4.044157 | 2.875339 | 0.031246 | 0.246071 | -3.67118 |
| lnc-EPB41L4B-1:1  | 1.287021 | 2.090675 | 2.875305 | 0.031247 | 0.246071 | -3.67122 |
| lnc-SSH1-2:1      | 1.199622 | 4.40244  | 2.873586 | 0.031314 | 0.246173 | -3.67344 |
| MSTRG.2211.6      | 1.239951 | 4.138045 | 2.87315  | 0.031331 | 0.246287 | -3.67401 |
| lnc-KLF12-6:1     | -1.43516 | 3.334815 | -2.8723  | 0.031364 | 0.246422 | -3.6751  |
| ENST00000564485.1 | -1.24598 | 3.090444 | -2.87193 | 0.031378 | 0.246439 | -3.67559 |
| NONHSAT202694.1   | 1.575708 | 4.230784 | 2.871899 | 0.03138  | 0.246439 | -3.67562 |
| NONHSAT179036.1   | -1.11693 | 1.865705 | -2.87176 | 0.031385 | 0.246451 | -3.6758  |
| lnc-ZNF787-1:1    | -1.21391 | 4.546632 | -2.87149 | 0.031395 | 0.246451 | -3.67614 |
| lnc-ELOVL4-3:1    | -1.18224 | 1.704542 | -2.86881 | 0.0315   | 0.246979 | -3.67961 |
| T116321           | 1.298727 | 2.216448 | 2.867953 | 0.031533 | 0.247031 | -3.68072 |
| lnc-RREB1-7:1     | 1.247586 | 2.283661 | 2.867713 | 0.031543 | 0.247063 | -3.68103 |
| MSTRG.56586.1     | -1.0474  | 2.816002 | -2.86737 | 0.031556 | 0.247112 | -3.68146 |
| NONHSAT153263.1   | 1.275672 | 2.024159 | 2.86681  | 0.031578 | 0.247159 | -3.68219 |
| lnc-SFXN1-1:1     | -1.07532 | 1.743878 | -2.86603 | 0.031609 | 0.247264 | -3.68321 |
| NONHSAT157985.1   | 1.168047 | 1.869835 | 2.865867 | 0.031615 | 0.247287 | -3.68341 |
| lnc-NUCB2-10:1    | -1.33506 | 2.722766 | -2.86523 | 0.03164  | 0.247385 | -3.68423 |
| NONHSAT190879.1   | 1.226799 | 1.704641 | 2.864643 | 0.031663 | 0.247432 | -3.68499 |
| ENST00000662137.1 | -1.79972 | 3.657693 | -2.86464 | 0.031663 | 0.247432 | -3.68499 |
| NONHSAT214384.1   | -1.24235 | 3.172887 | -2.86323 | 0.031719 | 0.247674 | -3.68682 |
| lnc-FCGBP-2:1     | -1.01645 | 1.74743  | -2.86276 | 0.031737 | 0.24773  | -3.68742 |
| lnc-CCDC28A-3:1   | 1.546573 | 3.955088 | 2.862525 | 0.031746 | 0.247735 | -3.68773 |
| lnc-SIRT4-4:1     | 1.518805 | 3.012177 | 2.861999 | 0.031767 | 0.247765 | -3.68841 |
| lnc-SELENOV-4:1   | 1.741702 | 3.133065 | 2.861653 | 0.031781 | 0.247795 | -3.68885 |
| NONHSAT168416.1   | 1.35031  | 3.731128 | 2.86141  | 0.03179  | 0.247816 | -3.68917 |
| MSTRG.48253.2     | 1.134435 | 4.60616  | 2.860485 | 0.031827 | 0.248039 | -3.69036 |
| lnc-CCDC6-2:1     | 1.485303 | 2.13939  | 2.859768 | 0.031855 | 0.248133 | -3.69129 |
| T251873           | 1.402995 | 2.81701  | 2.859661 | 0.031859 | 0.248133 | -3.69143 |
| MSTRG.65259.1     | 1.587846 | 2.651319 | 2.858393 | 0.03191  | 0.248242 | -3.69307 |
| NONHSAT208016.1   | -1.15136 | 3.892914 | -2.8582  | 0.031917 | 0.248269 | -3.69332 |
| NONHSAT177017.1   | 1.139366 | 1.862695 | 2.857333 | 0.031952 | 0.248435 | -3.69444 |
| T278895           | 1.943263 | 2.048393 | 2.856195 | 0.031997 | 0.248684 | -3.69591 |
| NONHSAT201843.1   | -1.18224 | 2.271857 | -2.85578 | 0.032013 | 0.248731 | -3.69645 |
| lnc-RAB11A-4:1    | 1.197296 | 2.0776   | 2.855553 | 0.032022 | 0.24875  | -3.69674 |
| NONHSAT201093.1   | -1.38868 | 3.217812 | -2.85545 | 0.032026 | 0.24875  | -3.69688 |
| NONHSAT206231.1   | -1.11638 | 1.95334  | -2.85389 | 0.032089 | 0.248982 | -3.6989  |
| NONHSAT174433.1   | 1.279297 | 2.089297 | 2.853385 | 0.032109 | 0.24903  | -3.69954 |
| NONHSAT180573.1   | 1.389337 | 4.983534 | 2.852819 | 0.032131 | 0.249034 | -3.70028 |
| lnc-C9orf57-3:1   | 1.044444 | 3.63049  | 2.85225  | 0.032154 | 0.249034 | -3.70101 |
| lnc-ALCAM-11:1    | -1.45805 | 2.419004 | -2.85164 | 0.032178 | 0.249084 | -3.7018  |
| ENST00000426213.1 | -1.40207 | 2.344763 | -2.85085 | 0.03221  | 0.249236 | -3.70282 |
| ENST00000559394.2 | -1.04896 | 1.978355 | -2.85059 | 0.03222  | 0.249236 | -3.70316 |
| NONHSAT217968.1   | 1.320535 | 1.755865 | 2.84967  | 0.032257 | 0.249346 | -3.70435 |
| ENST00000570186.1 | 1.437893 | 3.452268 | 2.849593 | 0.03226  | 0.249346 | -3.70445 |



|                   |          |          |          |          |          |          |
|-------------------|----------|----------|----------|----------|----------|----------|
| MSTRG.13842.2     | 1.186126 | 2.243366 | 2.849308 | 0.032272 | 0.249351 | -3.70482 |
| NONHSAT210183.1   | -1.33767 | 2.3275   | -2.84879 | 0.032293 | 0.249392 | -3.70549 |
| NONHSAT182459.1   | 1.38566  | 2.182811 | 2.847931 | 0.032327 | 0.249527 | -3.7066  |
| MSTRG.26929.1     | 1.052983 | 3.722146 | 2.847815 | 0.032331 | 0.249542 | -3.70675 |
| lnc-DUXA-2:1      | 1.040234 | 1.605851 | 2.846568 | 0.032382 | 0.249724 | -3.70836 |
| lnc-PCDH9-11:1    | -1.1123  | 2.689702 | -2.84639 | 0.032389 | 0.249734 | -3.70859 |
| NONHSAT153477.1   | 1.154599 | 1.627444 | 2.845694 | 0.032417 | 0.249837 | -3.70949 |
| NONHSAT185301.1   | 1.315529 | 4.747089 | 2.845567 | 0.032422 | 0.249858 | -3.70966 |
| NONHSAT209189.1   | 1.159655 | 3.538382 | 2.844318 | 0.032472 | 0.249959 | -3.71127 |
| lnc-FBXO9-6:1     | -1.06654 | 5.550516 | -2.84386 | 0.032491 | 0.250027 | -3.71187 |
| NONHSAT177435.1   | -1.40431 | 3.418804 | -2.84338 | 0.03251  | 0.250083 | -3.71249 |
| lnc-QSER1-1:1     | 1.136071 | 3.031374 | 2.842274 | 0.032555 | 0.250188 | -3.71392 |
| lnc-CAND1-6:1     | -1.11385 | 4.34491  | -2.84144 | 0.032589 | 0.250262 | -3.715   |
| NONHSAT161304.1   | -1.25822 | 2.504281 | -2.84116 | 0.0326   | 0.250293 | -3.71536 |
| NONHSAT173165.1   | -1.05281 | 2.290702 | -2.84019 | 0.03264  | 0.250497 | -3.71662 |
| MSTRG.10278.1     | 1.227306 | 3.739438 | 2.839257 | 0.032677 | 0.250573 | -3.71783 |
| ENST00000425185.2 | -1.17836 | 2.486914 | -2.83908 | 0.032685 | 0.250573 | -3.71806 |
| ENST00000511361.1 | 1.019004 | 1.85701  | 2.839049 | 0.032686 | 0.250573 | -3.71809 |
| NONHSAT223926.1   | -1.04277 | 4.988137 | -2.8389  | 0.032692 | 0.250579 | -3.71829 |
| NONHSAT155779.1   | 1.051924 | 4.033024 | 2.838549 | 0.032706 | 0.250579 | -3.71874 |
| NONHSAT206006.1   | 1.524114 | 1.869553 | 2.83626  | 0.032799 | 0.25084  | -3.72171 |
| MSTRG.50711.1     | -1.11236 | 2.991245 | -2.83623 | 0.032801 | 0.25084  | -3.72175 |
| ENST00000649257.1 | -1.06104 | 3.334265 | -2.83568 | 0.032823 | 0.250936 | -3.72246 |
| NONHSAT162008.1   | 1.33075  | 2.695514 | 2.835298 | 0.032839 | 0.250939 | -3.72295 |
| lnc-PPEF1-2:1     | 1.163234 | 2.319365 | 2.835097 | 0.032847 | 0.250939 | -3.72321 |
| ENST00000581727.1 | -1.16426 | 2.813382 | -2.83503 | 0.03285  | 0.250939 | -3.7233  |
| NONHSAT191190.1   | 1.036361 | 4.473246 | 2.834494 | 0.032872 | 0.250969 | -3.724   |
| MSTRG.70708.1     | 1.225161 | 2.425866 | 2.833269 | 0.032922 | 0.251097 | -3.72558 |
| NONHSAT192126.1   | 1.449614 | 4.272595 | 2.832926 | 0.032936 | 0.251158 | -3.72603 |
| MSTRG.62501.1     | 1.219627 | 3.377442 | 2.832877 | 0.032938 | 0.251158 | -3.72609 |
| NONHSAT178510.1   | -1.08919 | 2.634119 | -2.83284 | 0.032939 | 0.251158 | -3.72614 |
| NONHSAT201341.1   | 1.05106  | 2.591833 | 2.83232  | 0.032961 | 0.251206 | -3.72681 |
| NONHSAT194361.1   | 1.160276 | 3.203865 | 2.832003 | 0.032974 | 0.251267 | -3.72722 |
| NONHSAT183398.1   | -1.28234 | 2.265042 | -2.83184 | 0.03298  | 0.25129  | -3.72743 |
| NR_040080         | 1.149041 | 3.493079 | 2.831635 | 0.032989 | 0.25129  | -3.7277  |
| lnc-PLCG2-1:20    | 1.178513 | 2.82801  | 2.831428 | 0.032997 | 0.251295 | -3.72797 |
| NONHSAT193771.1   | 1.305798 | 2.724094 | 2.831427 | 0.032997 | 0.251295 | -3.72797 |
| lnc-DOC2B-2:2     | 1.176118 | 3.462103 | 2.83106  | 0.033012 | 0.251372 | -3.72844 |
| lnc-TP53TG3F-11:1 | 1.073868 | 4.530656 | 2.830778 | 0.033024 | 0.251394 | -3.72881 |
| lnc-CCL2-13:1     | 1.04352  | 1.722134 | 2.830581 | 0.033032 | 0.251394 | -3.72906 |
| NONHSAT194932.1   | -1.00947 | 5.377592 | -2.82995 | 0.033058 | 0.251453 | -3.72988 |
| lnc-ANKRD10-7:1   | -1.06027 | 1.877594 | -2.82989 | 0.03306  | 0.251453 | -3.72995 |
| MSTRG.65428.2     | -1.21249 | 2.276501 | -2.82961 | 0.033072 | 0.251486 | -3.73033 |
| T350762           | 1.085853 | 4.86113  | 2.829451 | 0.033079 | 0.251486 | -3.73053 |
| lnc-AKTIP-7:1     | 1.246709 | 2.794027 | 2.829225 | 0.033088 | 0.251486 | -3.73082 |
| ENST00000418426.1 | 1.246928 | 1.759363 | 2.82888  | 0.033102 | 0.251505 | -3.73127 |
| ENST00000413406.1 | -1.14969 | 2.776855 | -2.82814 | 0.033133 | 0.25154  | -3.73223 |
| NONHSAT159681.1   | 1.441033 | 1.868065 | 2.828101 | 0.033134 | 0.25154  | -3.73228 |

|                   |          |          |          |          |          |          |
|-------------------|----------|----------|----------|----------|----------|----------|
| NR_120650         | 1.843561 | 2.729048 | 2.827139 | 0.033174 | 0.25167  | -3.73353 |
| NONHSAT170054.1   | -1.52425 | 3.192896 | -2.82661 | 0.033196 | 0.251742 | -3.73421 |
| lnc-GBP5-3:4      | 1.647317 | 1.954279 | 2.826387 | 0.033205 | 0.251745 | -3.7345  |
| NR_103835         | -1.01915 | 5.058092 | -2.82473 | 0.033274 | 0.251997 | -3.73664 |
| lnc-PATE4-1:1     | 1.487909 | 2.307263 | 2.824679 | 0.033276 | 0.251997 | -3.73671 |
| lnc-MUC20-67:148  | 1.448661 | 1.912549 | 2.824334 | 0.03329  | 0.251997 | -3.73716 |
| ENST00000555303.1 | -1.07558 | 1.662335 | -2.82431 | 0.033291 | 0.251997 | -3.7372  |
| MSTRG.30622.1     | 1.490369 | 2.204807 | 2.823809 | 0.033312 | 0.252062 | -3.73784 |
| ENST00000658933.1 | -1.0991  | 2.424166 | -2.82231 | 0.033374 | 0.252291 | -3.73979 |
| lnc-KLHL29-4:1    | 1.435914 | 2.899578 | 2.822272 | 0.033376 | 0.252291 | -3.73983 |
| lnc-GCM1-2:1      | 1.455803 | 1.786033 | 2.822156 | 0.033381 | 0.252309 | -3.73999 |
| NONHSAT169160.1   | 1.033951 | 3.285378 | 2.821946 | 0.033389 | 0.252337 | -3.74026 |
| lnc-MTDH-1:1      | -1.07333 | 3.870022 | -2.82165 | 0.033402 | 0.252374 | -3.74064 |
| T187593           | -1.0092  | 2.233629 | -2.82109 | 0.033425 | 0.252374 | -3.74136 |
| NONHSAT197417.1   | 1.155646 | 2.137945 | 2.820805 | 0.033437 | 0.252374 | -3.74174 |
| NONHSAT218454.1   | -1.15071 | 6.203711 | -2.82051 | 0.033449 | 0.252374 | -3.74212 |
| ENST00000661858.1 | 1.12024  | 4.037058 | 2.820395 | 0.033454 | 0.25239  | -3.74227 |
| lnc-IFT20-11:1    | 1.272345 | 2.734871 | 2.81983  | 0.033478 | 0.252489 | -3.743   |
| NONHSAT198401.1   | -1.54245 | 2.621865 | -2.81937 | 0.033497 | 0.252506 | -3.7436  |
| NONHSAT148322.1   | 1.03585  | 3.09203  | 2.819202 | 0.033504 | 0.25252  | -3.74382 |
| NONHSAT158167.1   | -1.2826  | 3.13973  | -2.81889 | 0.033517 | 0.25258  | -3.74422 |
| NONHSAT216339.1   | 1.436261 | 2.252644 | 2.818552 | 0.033531 | 0.252589 | -3.74466 |
| lnc-ACHE-3:1      | -1.39666 | 5.051009 | -2.81839 | 0.033538 | 0.252589 | -3.74488 |
| lnc-CHODL-3:2     | 1.480893 | 4.271273 | 2.816801 | 0.033604 | 0.252975 | -3.74693 |
| lnc-ME14-12:1     | 1.219799 | 1.705882 | 2.816507 | 0.033617 | 0.253017 | -3.74731 |
| lnc-KIAA1755-12:1 | -1.15147 | 2.882778 | -2.81646 | 0.033618 | 0.253017 | -3.74737 |
| lnc-COX10-7:1     | -1.12477 | 2.028566 | -2.8157  | 0.03365  | 0.253115 | -3.74836 |
| NONHSAT174627.1   | -1.27714 | 4.458207 | -2.81534 | 0.033666 | 0.253154 | -3.74883 |
| NONHSAT193280.1   | -1.27029 | 2.169717 | -2.8126  | 0.033781 | 0.253471 | -3.75238 |
| lnc-WNT10A-2:1    | 1.285762 | 2.801285 | 2.8124   | 0.033789 | 0.253516 | -3.75264 |
| NONHSAT190356.1   | -1.01335 | 1.619513 | -2.8117  | 0.033819 | 0.253662 | -3.75355 |
| lnc-TTPA-1:8      | -1.40766 | 5.674085 | -2.81162 | 0.033822 | 0.253669 | -3.75366 |
| NONHSAT222282.1   | -1.02031 | 1.817209 | -2.81116 | 0.033842 | 0.253708 | -3.75425 |
| MSTRG.1679.1      | -1.2649  | 2.030101 | -2.81036 | 0.033875 | 0.25384  | -3.75529 |
| lnc-HS1BP3-4:1    | -1.98264 | 2.865192 | -2.80998 | 0.033892 | 0.253925 | -3.75579 |
| lnc-CXCR3-14:1    | 1.288191 | 2.618658 | 2.809788 | 0.0339   | 0.253963 | -3.75603 |
| NONHSAT202594.1   | 1.324877 | 2.444504 | 2.809677 | 0.033904 | 0.253963 | -3.75618 |
| lnc-MRPL39-34:1   | 1.979709 | 3.197054 | 2.809044 | 0.033931 | 0.254088 | -3.757   |
| ENST00000433344.1 | -1.48734 | 3.134937 | -2.80895 | 0.033935 | 0.254098 | -3.75712 |
| lnc-OCA2-6:1      | 1.209952 | 2.248017 | 2.80876  | 0.033943 | 0.254103 | -3.75737 |
| NONHSAT187945.1   | 1.314156 | 2.611027 | 2.808608 | 0.03395  | 0.254128 | -3.75756 |
| MSTRG.50782.1     | 1.174262 | 1.637236 | 2.808114 | 0.03397  | 0.254232 | -3.75821 |
| NONHSAT178959.1   | 1.366975 | 2.565924 | 2.807614 | 0.033992 | 0.254321 | -3.75885 |
| lnc-FKBPL-1:1     | -1.36305 | 2.356036 | -2.80708 | 0.034014 | 0.254399 | -3.75955 |
| NONHSAT193633.1   | -1.40457 | 3.13765  | -2.80693 | 0.034021 | 0.254399 | -3.75974 |
| lnc-CNTNAP3B-14:1 | 1.905482 | 3.328694 | 2.806398 | 0.034043 | 0.254489 | -3.76043 |
| lnc-FH-2:1        | 1.025756 | 2.257765 | 2.806356 | 0.034045 | 0.254489 | -3.76049 |
| NONHSAT210723.1   | -1.05474 | 3.840025 | -2.80611 | 0.034056 | 0.254525 | -3.76081 |

|                   |          |          |          |          |          |          |
|-------------------|----------|----------|----------|----------|----------|----------|
| lnc-HLTF-4:1      | -1.22137 | 3.397828 | -2.806   | 0.03406  | 0.254525 | -3.76095 |
| lnc-RASA3-8:1     | -1.03468 | 3.776348 | -2.80574 | 0.034071 | 0.254537 | -3.76129 |
| lnc-EBF1-1:1      | -1.01087 | 1.714962 | -2.80473 | 0.034114 | 0.254591 | -3.7626  |
| lnc-CDK5RAP1-2:1  | -1.19897 | 2.202573 | -2.80427 | 0.034134 | 0.254682 | -3.7632  |
| lnc-SEC11A-3:1    | -1.215   | 3.280223 | -2.80411 | 0.034141 | 0.254714 | -3.76341 |
| MSTRG.69717.3     | 1.055473 | 3.132197 | 2.803133 | 0.034182 | 0.254797 | -3.76467 |
| ENST00000606998.1 | 1.046617 | 1.713296 | 2.802572 | 0.034206 | 0.254821 | -3.7654  |
| LINC01504:1       | 1.548244 | 3.272666 | 2.80244  | 0.034212 | 0.254821 | -3.76557 |
| MSTRG.55011.9     | -1.41475 | 2.790137 | -2.80192 | 0.034234 | 0.254821 | -3.76625 |
| NONHSAT156407.1   | 1.687177 | 3.191262 | 2.80123  | 0.034264 | 0.254863 | -3.76715 |
| NONHSAT182761.1   | 1.326354 | 2.137536 | 2.801166 | 0.034266 | 0.254863 | -3.76723 |
| NONHSAT205845.1   | 1.267847 | 2.509396 | 2.801086 | 0.03427  | 0.254863 | -3.76733 |
| lnc-RNF187-3:3    | -1.09667 | 2.955955 | -2.80101 | 0.034273 | 0.254863 | -3.76743 |
| NONHSAT169946.1   | -1.26292 | 3.026484 | -2.80098 | 0.034275 | 0.254863 | -3.76748 |
| NONHSAT168915.1   | 1.765676 | 3.489816 | 2.797584 | 0.03442  | 0.255456 | -3.77188 |
| NONHSAT218493.1   | 1.342046 | 3.057707 | 2.796735 | 0.034457 | 0.255577 | -3.77299 |
| MSTRG.43948.1     | 1.098441 | 3.136894 | 2.79628  | 0.034476 | 0.255594 | -3.77358 |
| MSTRG.69795.1     | 1.162602 | 2.531472 | 2.796027 | 0.034487 | 0.255634 | -3.77391 |
| NONHSAT211342.1   | -1.32748 | 2.242502 | -2.79553 | 0.034509 | 0.255697 | -3.77455 |
| NR_104672         | 1.853855 | 3.158549 | 2.795275 | 0.03452  | 0.255729 | -3.77488 |
| ENST00000590241.1 | 1.34513  | 2.680621 | 2.794107 | 0.03457  | 0.255777 | -3.7764  |
| NONHSAT210356.1   | 1.048008 | 2.808183 | 2.793732 | 0.034586 | 0.255777 | -3.77689 |
| lnc-TRIM49B-1:1   | 1.891706 | 2.518467 | 2.79318  | 0.03461  | 0.255793 | -3.77761 |
| lnc-HOXC13-5:1    | 1.558047 | 2.944359 | 2.792882 | 0.034623 | 0.255851 | -3.77799 |
| MSTRG.55324.1     | 1.349644 | 2.357973 | 2.79249  | 0.03464  | 0.255901 | -3.7785  |
| NONHSAT161115.1   | -1.5244  | 3.270017 | -2.79217 | 0.034654 | 0.255967 | -3.77892 |
| lnc-GLRX3-2:6     | 1.580712 | 2.547085 | 2.791822 | 0.034669 | 0.255984 | -3.77937 |
| NONHSAT163794.1   | -1.28811 | 2.178659 | -2.79097 | 0.034706 | 0.256164 | -3.78048 |
| NONHSAT211802.1   | 1.527757 | 2.420375 | 2.789536 | 0.034768 | 0.256375 | -3.78234 |
| NONHSAT156184.1   | 1.316909 | 2.985568 | 2.789012 | 0.034791 | 0.256493 | -3.78303 |
| NONHSAT206354.1   | -1.1433  | 3.073966 | -2.78852 | 0.034813 | 0.256493 | -3.78366 |
| lnc-TXNDC2-8:1    | -1.00627 | 3.807134 | -2.78846 | 0.034815 | 0.256493 | -3.78374 |
| MSTRG.67348.1     | 1.160548 | 8.296154 | 2.788427 | 0.034817 | 0.256493 | -3.78379 |
| ENST00000418004.5 | -1.14728 | 2.390142 | -2.78784 | 0.034842 | 0.256549 | -3.78455 |
| lnc-BAG3-4:5      | -1.07341 | 4.246168 | -2.78766 | 0.03485  | 0.256586 | -3.78478 |
| MSTRG.44410.1     | 1.156809 | 1.740471 | 2.786282 | 0.03491  | 0.256774 | -3.78658 |
| lnc-COBL1-3:1     | -1.04966 | 2.748611 | -2.78507 | 0.034963 | 0.256972 | -3.78816 |
| lnc-ZNF433-2:1    | -1.84401 | 4.126916 | -2.78488 | 0.034972 | 0.257013 | -3.7884  |
| lnc-INHBC-1:3     | -1.15799 | 3.500403 | -2.78398 | 0.035011 | 0.257227 | -3.78957 |
| NONHSAT187660.1   | -1.16419 | 3.489498 | -2.78368 | 0.035024 | 0.257227 | -3.78996 |
| NONHSAT178270.1   | -1.25693 | 3.02481  | -2.78306 | 0.035051 | 0.257291 | -3.79076 |
| NONHSAT204530.1   | 1.077327 | 2.926278 | 2.782079 | 0.035094 | 0.25739  | -3.79204 |
| lnc-ZNF704-8:1    | 1.170988 | 1.677383 | 2.781673 | 0.035112 | 0.25745  | -3.79257 |
| lnc-SFTPB-2:1     | 1.231061 | 3.63416  | 2.780309 | 0.035172 | 0.257717 | -3.79435 |
| lnc-EXD2-9:1      | -1.20495 | 3.175012 | -2.77942 | 0.035211 | 0.257886 | -3.7955  |
| lnc-ESPN-5:4      | 1.190363 | 2.102971 | 2.778607 | 0.035247 | 0.257941 | -3.79656 |
| NONHSAT208124.1   | -1.18084 | 1.986241 | -2.77814 | 0.035268 | 0.258024 | -3.79716 |
| NONHSAT171942.1   | -1.15966 | 2.325873 | -2.778   | 0.035274 | 0.25804  | -3.79735 |

|                   |          |          |          |          |          |          |
|-------------------|----------|----------|----------|----------|----------|----------|
| NONHSAT215876.1   | 1.323197 | 3.065995 | 2.777975 | 0.035275 | 0.25804  | -3.79738 |
| ENST00000434195.1 | 1.093604 | 4.003045 | 2.777647 | 0.03529  | 0.258091 | -3.79781 |
| MSTRG.15843.1     | 1.745654 | 6.761313 | 2.777161 | 0.035311 | 0.258116 | -3.79844 |
| MSTRG.54666.1     | 1.364201 | 2.042657 | 2.776739 | 0.03533  | 0.258148 | -3.79899 |
| NONHSAT203976.1   | -1.23971 | 2.002419 | -2.77667 | 0.035333 | 0.258148 | -3.79908 |
| lnc-ATP6V1C1-2:1  | -1.22763 | 1.822711 | -2.77626 | 0.035351 | 0.258179 | -3.79961 |
| NONHSAT168770.1   | 1.376398 | 2.723071 | 2.775986 | 0.035363 | 0.258197 | -3.79997 |
| lnc-WWC2-6:1      | -1.06345 | 7.05932  | -2.77592 | 0.035366 | 0.258197 | -3.80006 |
| NONHSAT218726.1   | -1.47545 | 3.437419 | -2.77542 | 0.035388 | 0.258197 | -3.80071 |
| MSTRG.58292.5     | 1.243255 | 1.640921 | 2.775386 | 0.03539  | 0.258197 | -3.80075 |
| NONHSAT156420.1   | 1.654669 | 3.124644 | 2.77535  | 0.035391 | 0.258197 | -3.8008  |
| ENST00000453972.1 | 1.319155 | 2.772421 | 2.773961 | 0.035453 | 0.258498 | -3.80261 |
| NONHSAT201101.1   | 1.574947 | 3.040584 | 2.773488 | 0.035474 | 0.258576 | -3.80322 |
| NONHSAT200428.1   | -1.72425 | 3.293098 | -2.77304 | 0.035494 | 0.258611 | -3.80381 |
| NONHSAT219902.1   | -1.02926 | 3.790814 | -2.77294 | 0.035498 | 0.258618 | -3.80394 |
| MSTRG.63708.1     | 1.112244 | 3.92112  | 2.772755 | 0.035507 | 0.258627 | -3.80418 |
| lnc-ATP2A2-1:1    | 1.095621 | 1.880606 | 2.771816 | 0.035548 | 0.25873  | -3.8054  |
| NONHSAT197097.1   | -1.03311 | 2.098777 | -2.77143 | 0.035566 | 0.258796 | -3.80591 |
| ENST00000647804.1 | 1.257437 | 2.319381 | 2.770999 | 0.035585 | 0.258823 | -3.80647 |
| NONHSAT163791.1   | 1.388113 | 2.770191 | 2.76958  | 0.035648 | 0.258989 | -3.80831 |
| NONHSAT194018.1   | 2.705415 | 2.434185 | 2.769579 | 0.035648 | 0.258989 | -3.80831 |
| NONHSAT168988.1   | -1.38321 | 3.497365 | -2.76921 | 0.035665 | 0.258992 | -3.8088  |
| NONHSAT175992.1   | 1.477178 | 2.15686  | 2.769099 | 0.03567  | 0.258992 | -3.80894 |
| lnc-NDST1-3:1     | 1.596503 | 3.093085 | 2.76852  | 0.035696 | 0.259049 | -3.80969 |
| T372664           | -1.14975 | 8.130303 | -2.76824 | 0.035708 | 0.259053 | -3.81005 |
| NONHSAT205246.1   | -1.46767 | 1.968621 | -2.76759 | 0.035737 | 0.259143 | -3.81091 |
| MSTRG.2379.1      | -1.12935 | 2.765653 | -2.76754 | 0.035739 | 0.259143 | -3.81096 |
| ENST00000567907.1 | 1.358082 | 2.749707 | 2.766692 | 0.035778 | 0.259271 | -3.81207 |
| lnc-LAD1-1:2      | 1.507541 | 2.37394  | 2.766143 | 0.035802 | 0.259314 | -3.81279 |
| lnc-HNRNPM-6:1    | 1.169198 | 2.316467 | 2.765985 | 0.035809 | 0.259314 | -3.81299 |
| LINC00955:6       | 1.046049 | 1.665883 | 2.765736 | 0.035821 | 0.259336 | -3.81332 |
| MSTRG.19529.5     | 1.289165 | 1.740166 | 2.765239 | 0.035843 | 0.259342 | -3.81397 |
| NONHSAT188336.1   | 1.355476 | 2.502059 | 2.764598 | 0.035872 | 0.259466 | -3.8148  |
| NONHSAT164531.1   | 1.700853 | 2.196702 | 2.763878 | 0.035904 | 0.259609 | -3.81574 |
| ENST00000481312.1 | 1.042961 | 3.693963 | 2.763055 | 0.035941 | 0.259728 | -3.81681 |
| NONHSAT197953.1   | 1.125329 | 3.781405 | 2.762153 | 0.035982 | 0.25978  | -3.81799 |
| NONHSAT172238.1   | -1.0833  | 2.84551  | -2.7616  | 0.036007 | 0.25983  | -3.81871 |
| ENST00000646143.2 | 1.946612 | 5.292915 | 2.760021 | 0.036078 | 0.260104 | -3.82077 |
| NONHSAT202423.1   | 1.05487  | 3.537984 | 2.759635 | 0.036096 | 0.260166 | -3.82127 |
| MSTRG.45727.2     | 1.052067 | 2.138328 | 2.756794 | 0.036225 | 0.260749 | -3.82497 |
| lnc-CHRDL2-4:1    | 1.292524 | 5.437803 | 2.756277 | 0.036248 | 0.260782 | -3.82565 |
| ENST00000453924.1 | -1.21268 | 2.839241 | -2.75613 | 0.036255 | 0.260782 | -3.82584 |
| NONHSAT206320.1   | 1.000498 | 2.440145 | 2.756086 | 0.036257 | 0.260782 | -3.8259  |
| NONHSAT185781.1   | 1.301672 | 2.181712 | 2.756038 | 0.036259 | 0.260782 | -3.82596 |
| NONHSAT183119.1   | -1.21636 | 1.691506 | -2.75593 | 0.036264 | 0.260791 | -3.8261  |
| NONHSAT176492.1   | -1.34599 | 2.870657 | -2.75582 | 0.036269 | 0.260809 | -3.82625 |
| MSTRG.10705.1     | 1.492189 | 2.756323 | 2.75567  | 0.036276 | 0.260833 | -3.82644 |
| MSTRG.36139.1     | 1.087199 | 4.5249   | 2.755166 | 0.036299 | 0.260847 | -3.8271  |

|                   |          |          |          |          |          |          |
|-------------------|----------|----------|----------|----------|----------|----------|
| lnc-TMEM53-1:1    | 1.576502 | 3.161884 | 2.755057 | 0.036304 | 0.260847 | -3.82724 |
| LINC01284:4       | 1.302479 | 1.805388 | 2.754787 | 0.036316 | 0.260847 | -3.82759 |
| NONHSAT209233.1   | 1.456861 | 2.266073 | 2.754648 | 0.036322 | 0.260847 | -3.82777 |
| lnc-SLC25A28-1:2  | 1.512616 | 2.327686 | 2.75152  | 0.036465 | 0.261525 | -3.83185 |
| NONHSAT188153.1   | -1.2561  | 2.057236 | -2.75076 | 0.0365   | 0.261593 | -3.83284 |
| lnc-CYP3A7-2:7    | 1.074925 | 4.34212  | 2.749227 | 0.036571 | 0.261805 | -3.83484 |
| NONHSAT181210.1   | 1.83543  | 2.750317 | 2.748805 | 0.03659  | 0.261847 | -3.83539 |
| MSTRG.63581.1     | 1.23707  | 4.002816 | 2.748463 | 0.036606 | 0.261898 | -3.83584 |
| lnc-TRNP1-4:1     | 1.555611 | 2.966786 | 2.748149 | 0.03662  | 0.261935 | -3.83625 |
| NONHSAT207682.1   | -1.46713 | 5.794474 | -2.74799 | 0.036628 | 0.261948 | -3.83646 |
| NONHSAT156216.1   | 1.02846  | 2.372896 | 2.747886 | 0.036632 | 0.261963 | -3.83659 |
| NONHSAT218898.1   | 1.178366 | 3.574502 | 2.747509 | 0.03665  | 0.262033 | -3.83708 |
| lnc-TMED10-4:1    | -1.24069 | 2.350351 | -2.74721 | 0.036663 | 0.262092 | -3.83747 |
| lnc-TRIM13-7:1    | -1.03313 | 2.187099 | -2.74704 | 0.036671 | 0.262093 | -3.8377  |
| MSTRG.45201.1     | 1.363464 | 4.772671 | 2.747002 | 0.036673 | 0.262093 | -3.83774 |
| lnc-STK26-11:1    | 1.323403 | 2.87595  | 2.746818 | 0.036682 | 0.262103 | -3.83798 |
| NONHSAT151609.1   | -1.50376 | 4.983954 | -2.74612 | 0.036714 | 0.262172 | -3.8389  |
| T102435           | 1.684199 | 3.391764 | 2.745643 | 0.036736 | 0.262238 | -3.83952 |
| ENST00000422600.1 | 1.127816 | 3.144822 | 2.745376 | 0.036748 | 0.262283 | -3.83987 |
| MSTRG.12580.1     | -1.1221  | 2.348802 | -2.74533 | 0.03675  | 0.262283 | -3.83992 |
| MSTRG.49474.1     | -1.00403 | 3.918826 | -2.74426 | 0.0368   | 0.262381 | -3.84132 |
| lnc-TMTC3-18:2    | -1.28142 | 5.440329 | -2.74382 | 0.03682  | 0.262404 | -3.84189 |
| NONHSAT181420.1   | -1.26336 | 5.40145  | -2.74339 | 0.03684  | 0.262404 | -3.84246 |
| NONHSAT224206.1   | 1.490997 | 3.035231 | 2.74332  | 0.036843 | 0.262404 | -3.84255 |
| lnc-RFX8-2:1      | -1.08671 | 2.059884 | -2.74313 | 0.036852 | 0.262417 | -3.8428  |
| NONHSAT157935.1   | 1.371743 | 1.76324  | 2.742939 | 0.036861 | 0.26244  | -3.84305 |
| MSTRG.16892.1     | 1.457971 | 3.070369 | 2.742861 | 0.036865 | 0.26244  | -3.84315 |
| NONHSAT180343.1   | 1.709601 | 3.099968 | 2.742839 | 0.036866 | 0.26244  | -3.84318 |
| NONHSAT172990.1   | 1.551223 | 3.509034 | 2.742632 | 0.036875 | 0.26244  | -3.84345 |
| MSTRG.35465.1     | 1.009772 | 2.289324 | 2.742611 | 0.036876 | 0.26244  | -3.84347 |
| lnc-BMP5-3:1      | -1.02956 | 3.297167 | -2.74248 | 0.036882 | 0.262449 | -3.84365 |
| MSTRG.14113.1     | 1.189386 | 3.60145  | 2.741985 | 0.036905 | 0.262573 | -3.84429 |
| MSTRG.1479.1      | 1.549809 | 2.406442 | 2.740747 | 0.036963 | 0.262685 | -3.84591 |
| MSTRG.23277.1     | -1.01644 | 9.257805 | -2.7406  | 0.036969 | 0.262685 | -3.8461  |
| NONHSAT167081.1   | 1.409788 | 3.301732 | 2.740157 | 0.03699  | 0.262714 | -3.84668 |
| NONHSAT184132.1   | -1.23275 | 3.535441 | -2.73909 | 0.03704  | 0.262881 | -3.84807 |
| MSTRG.22132.2     | 1.06937  | 1.644503 | 2.738694 | 0.037058 | 0.262898 | -3.84859 |
| NONHSAT152586.1   | -1.1069  | 1.962477 | -2.73815 | 0.037084 | 0.262994 | -3.84929 |
| ENST00000560153.2 | -1.08839 | 4.416493 | -2.73755 | 0.037112 | 0.263051 | -3.85008 |
| NONHSAT169431.1   | 1.074241 | 1.602633 | 2.736548 | 0.037158 | 0.263224 | -3.85139 |
| NONHSAT204454.1   | 1.732361 | 4.038334 | 2.73595  | 0.037186 | 0.263377 | -3.85217 |
| NONHSAT166089.1   | 1.147636 | 3.054766 | 2.735824 | 0.037192 | 0.263383 | -3.85233 |
| lnc-ZDHHC17-7:1   | -1.046   | 4.992958 | -2.73561 | 0.037202 | 0.263405 | -3.85261 |
| MSTRG.48996.1     | -1.30762 | 2.582217 | -2.7341  | 0.037273 | 0.263643 | -3.85458 |
| NONHSAT160987.1   | 1.314556 | 2.619202 | 2.73394  | 0.037281 | 0.263663 | -3.85479 |
| NONHSAT210660.1   | 1.427516 | 2.949462 | 2.732351 | 0.037355 | 0.264054 | -3.85687 |
| NONHSAT197414.1   | 1.180927 | 2.612861 | 2.731531 | 0.037394 | 0.26413  | -3.85794 |
| NONHSAT183693.1   | 1.024881 | 1.691683 | 2.731176 | 0.037411 | 0.26414  | -3.8584  |

|                   |          |          |          |          |          |          |
|-------------------|----------|----------|----------|----------|----------|----------|
| lnc-PRPF40B-1:3   | -1.33317 | 2.544275 | -2.73023 | 0.037455 | 0.264356 | -3.85964 |
| lnc-RREB1-9:4     | -1.41657 | 2.760264 | -2.72959 | 0.037486 | 0.264482 | -3.86048 |
| lnc-SH3RF3-2:1    | 1.448983 | 2.913117 | 2.729376 | 0.037495 | 0.264496 | -3.86075 |
| ENST00000548738.1 | 1.257808 | 2.484726 | 2.7293   | 0.037499 | 0.264502 | -3.86085 |
| lnc-LRIG1-5:1     | 1.270369 | 4.679466 | 2.729192 | 0.037504 | 0.264502 | -3.861   |
| ENST00000630472.1 | 1.112063 | 2.367457 | 2.72876  | 0.037525 | 0.264553 | -3.86156 |
| NONHSAT210756.1   | -1.4176  | 2.549029 | -2.72753 | 0.037583 | 0.264778 | -3.86316 |
| lnc-ZNF681-5:1    | 1.147673 | 1.607355 | 2.727276 | 0.037595 | 0.264808 | -3.8635  |
| ENST00000520543.1 | 1.658338 | 5.464359 | 2.726185 | 0.037647 | 0.265017 | -3.86493 |
| ENST00000563347.1 | 1.012159 | 1.604392 | 2.725875 | 0.037661 | 0.265045 | -3.86533 |
| NONHSAT175661.1   | -1.2647  | 1.780315 | -2.72563 | 0.037673 | 0.265045 | -3.86565 |
| T191068           | 1.135115 | 5.066245 | 2.725062 | 0.0377   | 0.265138 | -3.86639 |
| MSTRG.66289.1     | 1.099491 | 3.954599 | 2.724771 | 0.037714 | 0.26514  | -3.86677 |
| lnc-PCDH7-16:1    | -1.25402 | 2.380003 | -2.7246  | 0.037722 | 0.26514  | -3.86699 |
| NONHSAT179294.1   | 1.105395 | 1.963271 | 2.723746 | 0.037762 | 0.265227 | -3.86811 |
| NONHSAT170348.1   | 1.053234 | 5.345052 | 2.723103 | 0.037793 | 0.265314 | -3.86895 |
| lnc-TRABD2A-6:1   | -1.32085 | 4.258181 | -2.72258 | 0.037818 | 0.265362 | -3.86964 |
| lnc-NXF2B-1:1     | 1.258728 | 2.587398 | 2.722522 | 0.037821 | 0.265362 | -3.86971 |
| NONHSAT196989.1   | -1.02361 | 1.685277 | -2.7224  | 0.037826 | 0.265362 | -3.86987 |
| NONHSAT190106.1   | 1.280764 | 2.154152 | 2.722351 | 0.037829 | 0.265362 | -3.86994 |
| ENST00000499137.6 | -1.17859 | 2.493032 | -2.72184 | 0.037853 | 0.265459 | -3.8706  |
| NONHSAT188130.1   | 1.719108 | 3.544561 | 2.720888 | 0.037899 | 0.265645 | -3.87185 |
| lnc-SLC13A1-1:2   | -1.23096 | 2.74175  | -2.72078 | 0.037904 | 0.265645 | -3.87199 |
| NONHSAT164390.1   | 1.40102  | 3.143843 | 2.720569 | 0.037914 | 0.265645 | -3.87226 |
| T239058           | -1.46247 | 2.317165 | -2.71912 | 0.037983 | 0.265809 | -3.87416 |
| lnc-TAF5L-4:2     | -1.34899 | 3.362631 | -2.71909 | 0.037985 | 0.265809 | -3.8742  |
| lnc-TMEM17-6:1    | -1.01669 | 1.818894 | -2.71723 | 0.038074 | 0.266143 | -3.87663 |
| NR_024236         | -1.05568 | 7.486792 | -2.71723 | 0.038074 | 0.266143 | -3.87663 |
| MSTRG.37775.1     | 1.041783 | 4.14238  | 2.717076 | 0.038081 | 0.266143 | -3.87683 |
| NONHSAT161080.1   | 1.781446 | 2.844504 | 2.717017 | 0.038084 | 0.266143 | -3.87691 |
| lnc-BRF1-65:1     | 1.546937 | 2.980594 | 2.716881 | 0.038091 | 0.266143 | -3.87709 |
| lnc-RAP1A-2:1     | 1.25935  | 1.730995 | 2.716543 | 0.038107 | 0.266164 | -3.87753 |
| MSTRG.41652.30    | 1.017798 | 3.400804 | 2.715837 | 0.038141 | 0.266254 | -3.87845 |
| lnc-SUMO1-1:3     | -1.53437 | 3.149327 | -2.71488 | 0.038187 | 0.266367 | -3.8797  |
| lnc-PPP1R3D-5:1   | 1.382101 | 2.033282 | 2.714571 | 0.038202 | 0.266367 | -3.88011 |
| NONHSAT186983.1   | 1.182124 | 2.918619 | 2.713844 | 0.038237 | 0.266401 | -3.88106 |
| NONHSAT190586.1   | 1.41716  | 7.202784 | 2.713719 | 0.038243 | 0.266401 | -3.88122 |
| NONHSAT201462.1   | 1.603556 | 2.936206 | 2.71299  | 0.038278 | 0.266492 | -3.88217 |
| NONHSAT177084.1   | -1.10115 | 3.521711 | -2.71282 | 0.038286 | 0.26653  | -3.88239 |
| NONHSAT154009.1   | 1.317751 | 1.749947 | 2.712596 | 0.038297 | 0.266534 | -3.88269 |
| NONHSAT187827.1   | 1.246226 | 2.358428 | 2.712286 | 0.038312 | 0.266564 | -3.8831  |
| lnc-RASGRP3-7:1   | -1.1141  | 2.104809 | -2.71186 | 0.038333 | 0.266634 | -3.88366 |
| T285145           | 1.01259  | 2.491151 | 2.71172  | 0.038339 | 0.266648 | -3.88384 |
| T050176           | 1.221219 | 2.08586  | 2.711595 | 0.038345 | 0.266663 | -3.884   |
| lnc-JPH3-6:2      | 1.023993 | 3.428689 | 2.711304 | 0.03836  | 0.266692 | -3.88438 |
| MSTRG.33107.1     | -1.10797 | 2.422267 | -2.71014 | 0.038416 | 0.266809 | -3.88591 |
| NONHSAT153363.1   | -1.3319  | 1.967391 | -2.70994 | 0.038425 | 0.266826 | -3.88616 |
| NONHSAT206343.1   | 1.169647 | 2.709392 | 2.708936 | 0.038474 | 0.267029 | -3.88748 |

|                   |          |          |          |          |          |          |
|-------------------|----------|----------|----------|----------|----------|----------|
| lnc-FOXG1-9:1     | -1.30227 | 3.006912 | -2.70877 | 0.038482 | 0.267048 | -3.88769 |
| LINC01010:9       | -1.16196 | 2.501258 | -2.70714 | 0.038562 | 0.267341 | -3.88983 |
| lnc-NIPSNAP3B-4:1 | 1.267789 | 2.51289  | 2.706931 | 0.038572 | 0.267346 | -3.8901  |
| T105475           | 2.059865 | 2.443086 | 2.706746 | 0.038581 | 0.267346 | -3.89034 |
| NONHSAT171724.1   | 1.2125   | 1.973384 | 2.706325 | 0.038601 | 0.267368 | -3.89089 |
| MSTRG.55435.1     | -1.36726 | 3.127686 | -2.70537 | 0.038648 | 0.267458 | -3.89214 |
| lnc-HNRNPU-9:1    | 1.018513 | 2.215522 | 2.704942 | 0.038669 | 0.267458 | -3.89271 |
| NONHSAT201647.1   | -1.49253 | 2.829215 | -2.70486 | 0.038673 | 0.267458 | -3.89282 |
| NONHSAT187452.1   | 1.721281 | 3.054235 | 2.704851 | 0.038673 | 0.267458 | -3.89282 |
| lnc-GPR65-17:1    | -1.57976 | 6.791746 | -2.70217 | 0.038804 | 0.26779  | -3.89633 |
| ENST00000427132.1 | -1.32562 | 2.312255 | -2.70165 | 0.03883  | 0.267838 | -3.89701 |
| NONHSAT161188.1   | 1.126103 | 2.880368 | 2.700642 | 0.038879 | 0.267978 | -3.89833 |
| ENST00000563151.1 | -1.42689 | 2.672108 | -2.70029 | 0.038897 | 0.268043 | -3.8988  |
| lnc-MARCKS-15:1   | 1.43963  | 1.827964 | 2.699692 | 0.038926 | 0.268135 | -3.89958 |
| MSTRG.53678.1     | 1.15335  | 2.163927 | 2.699557 | 0.038933 | 0.268148 | -3.89975 |
| NONHSAT185708.1   | 1.571254 | 1.89411  | 2.699408 | 0.03894  | 0.268148 | -3.89995 |
| NONHSAT207345.1   | -1.19346 | 2.541249 | -2.69938 | 0.038941 | 0.268148 | -3.89998 |
| NONHSAT221730.1   | -1.60121 | 3.127354 | -2.69889 | 0.038965 | 0.268222 | -3.90062 |
| T345100           | 1.080584 | 1.838571 | 2.69809  | 0.039005 | 0.268227 | -3.90167 |
| ENST00000661314.1 | 1.004726 | 3.87282  | 2.697458 | 0.039036 | 0.268236 | -3.9025  |
| NONHSAT158553.1   | -1.36542 | 3.084423 | -2.69725 | 0.039046 | 0.268236 | -3.90278 |
| lnc-ACVR1-4:1     | 1.392255 | 2.482299 | 2.696877 | 0.039065 | 0.268236 | -3.90326 |
| NONHSAT171502.1   | 1.190622 | 2.275367 | 2.696651 | 0.039076 | 0.268236 | -3.90356 |
| MSTRG.57595.1     | 1.365601 | 1.783551 | 2.695769 | 0.03912  | 0.268396 | -3.90471 |
| ENST00000648110.1 | 1.36159  | 2.220073 | 2.694978 | 0.039159 | 0.268544 | -3.90575 |
| NONHSAT199573.1   | 1.28522  | 2.639137 | 2.694439 | 0.039185 | 0.268618 | -3.90646 |
| MSTRG.50656.1     | -1.54902 | 3.056489 | -2.69417 | 0.039199 | 0.268672 | -3.90681 |
| lnc-ZFP42-8:1     | -1.11312 | 1.900609 | -2.6941  | 0.039202 | 0.268678 | -3.9069  |
| NONHSAT169853.1   | 1.065801 | 2.533724 | 2.693841 | 0.039215 | 0.268698 | -3.90724 |
| lnc-OFD1-2:1      | 1.103414 | 1.638942 | 2.692868 | 0.039263 | 0.26875  | -3.90851 |
| lnc-PTCD2-7:1     | -1.2129  | 3.128426 | -2.69195 | 0.039309 | 0.268972 | -3.90972 |
| ENST00000668076.1 | 1.055594 | 4.173331 | 2.690878 | 0.039362 | 0.269148 | -3.91112 |
| NONHSAT207179.1   | -1.2233  | 2.011782 | -2.69052 | 0.03938  | 0.269166 | -3.91159 |
| MSTRG.55418.1     | -1.12882 | 3.137771 | -2.69038 | 0.039387 | 0.269175 | -3.91177 |
| lnc-RACGAP1-1:13  | -1.92347 | 3.756213 | -2.68892 | 0.03946  | 0.269434 | -3.91369 |
| NONHSAT210258.1   | -1.05728 | 1.852013 | -2.68887 | 0.039462 | 0.269434 | -3.91375 |
| ENST00000448643.1 | -1.09439 | 2.013215 | -2.68846 | 0.039483 | 0.269503 | -3.91429 |
| ENST00000668740.1 | 1.435859 | 1.826365 | 2.687993 | 0.039506 | 0.269606 | -3.9149  |
| lnc-OR52H1-1:1    | 1.107353 | 1.797151 | 2.687845 | 0.039513 | 0.26962  | -3.91509 |
| lnc-DENND3-1:2    | 1.064151 | 2.305316 | 2.687383 | 0.039537 | 0.269645 | -3.9157  |
| NONHSAT192443.1   | -1.22122 | 2.19353  | -2.68657 | 0.039577 | 0.269796 | -3.91676 |
| ENST00000653425.1 | -1.34134 | 4.178081 | -2.68655 | 0.039578 | 0.269796 | -3.9168  |
| LINC01180:2       | 1.169955 | 3.586079 | 2.685576 | 0.039627 | 0.270003 | -3.91807 |
| NONHSAT187591.1   | 1.263944 | 1.724811 | 2.685309 | 0.03964  | 0.270003 | -3.91842 |
| lnc-IGFBP7-2:1    | 1.054803 | 2.007526 | 2.685272 | 0.039642 | 0.270003 | -3.91847 |
| T344722           | -1.77235 | 4.637997 | -2.68512 | 0.03965  | 0.270005 | -3.91867 |
| NONHSAT210236.1   | 1.386747 | 2.358818 | 2.684946 | 0.039659 | 0.270027 | -3.91889 |
| lnc-DDX25-1:2     | -1.0625  | 1.756039 | -2.68441 | 0.039686 | 0.270119 | -3.9196  |

|                   |          |          |          |          |          |          |
|-------------------|----------|----------|----------|----------|----------|----------|
| NONHSAT206458.1   | -1.28445 | 2.61425  | -2.684   | 0.039706 | 0.270204 | -3.92013 |
| MSTRG.52989.1     | 1.182012 | 4.603647 | 2.683692 | 0.039722 | 0.270265 | -3.92054 |
| ENST00000655799.1 | 1.496698 | 2.854996 | 2.682791 | 0.039767 | 0.270435 | -3.92172 |
| lnc-HLA-DRB1-7:1  | 1.718115 | 3.325061 | 2.68235  | 0.039789 | 0.27052  | -3.9223  |
| lnc-CPO-1:5       | -1.04176 | 4.821923 | -2.68201 | 0.039806 | 0.27056  | -3.92274 |
| lnc-NF2-2:1       | -1.05171 | 2.834369 | -2.682   | 0.039807 | 0.27056  | -3.92276 |
| NONHSAT174630.1   | 1.253187 | 2.154948 | 2.681629 | 0.039825 | 0.270653 | -3.92324 |
| NONHSAT149097.1   | -1.01115 | 1.82064  | -2.68139 | 0.039837 | 0.270653 | -3.92355 |
| ENST00000649077.1 | 1.460084 | 2.058424 | 2.681369 | 0.039839 | 0.270653 | -3.92358 |
| MSTRG.32971.1     | -1.35363 | 2.903483 | -2.68066 | 0.039874 | 0.270783 | -3.92451 |
| NONHSAT201918.1   | 1.172494 | 2.480313 | 2.680027 | 0.039906 | 0.270803 | -3.92534 |
| MSTRG.61915.1     | -1.0606  | 1.767528 | -2.67951 | 0.039933 | 0.270803 | -3.92602 |
| NONHSAT222334.1   | 1.324581 | 2.36897  | 2.679491 | 0.039933 | 0.270803 | -3.92604 |
| MSTRG.34127.1     | 1.108796 | 5.95317  | 2.678554 | 0.039981 | 0.270994 | -3.92727 |
| MSTRG.38899.7     | -1.14005 | 2.213661 | -2.67782 | 0.040018 | 0.2711   | -3.92823 |
| NONHSAT176078.1   | -1.09726 | 3.109527 | -2.6773  | 0.040044 | 0.27117  | -3.92892 |
| lnc-STOM-7:3      | -1.322   | 3.466053 | -2.67719 | 0.04005  | 0.271175 | -3.92906 |
| lnc-ZFAND5-1:1    | -1.00867 | 2.413634 | -2.67654 | 0.040083 | 0.271286 | -3.92992 |
| lnc-CDRT15-5:1    | -1.17059 | 5.413398 | -2.67594 | 0.040113 | 0.271381 | -3.9307  |
| NONHSAT193262.1   | -1.19329 | 5.261257 | -2.67586 | 0.040118 | 0.271381 | -3.93081 |
| lnc-RAB30-6:1     | -1.32516 | 2.881928 | -2.67579 | 0.040121 | 0.271381 | -3.93089 |
| NONHSAT176466.1   | -1.40234 | 7.889981 | -2.67579 | 0.040121 | 0.271381 | -3.9309  |
| lnc-GRIA3-3:1     | -1.88701 | 3.332285 | -2.67522 | 0.04015  | 0.271503 | -3.93165 |
| lnc-LMBR1-8:2     | -1.29696 | 3.238561 | -2.67464 | 0.04018  | 0.271657 | -3.93241 |
| NONHSAT160653.1   | 1.691734 | 3.312168 | 2.674336 | 0.040195 | 0.271698 | -3.9328  |
| ENST00000426771.1 | -1.2384  | 3.039756 | -2.6742  | 0.040202 | 0.271698 | -3.93298 |
| ENST00000420237.1 | 1.288823 | 2.816692 | 2.673773 | 0.040224 | 0.271731 | -3.93354 |
| ENST00000558888.2 | -1.38591 | 1.99849  | -2.67366 | 0.040229 | 0.271731 | -3.93368 |
| lnc-SLC35C1-1:2   | -1.55544 | 6.90573  | -2.67354 | 0.040236 | 0.271753 | -3.93385 |
| MSTRG.31144.1     | -1.48234 | 2.641271 | -2.6734  | 0.040243 | 0.271766 | -3.93404 |
| NONHSAT209420.1   | 1.65587  | 3.113538 | 2.672668 | 0.04028  | 0.271871 | -3.93499 |
| ENST00000661000.1 | -1.02002 | 2.722312 | -2.6723  | 0.040299 | 0.271877 | -3.93547 |
| ENST00000531609.1 | -1.15937 | 2.71686  | -2.67227 | 0.0403   | 0.271877 | -3.93551 |
| NONHSAT218649.1   | 1.057976 | 1.963062 | 2.672251 | 0.040301 | 0.271877 | -3.93554 |
| MSTRG.53588.1     | -1.02956 | 2.064242 | -2.67223 | 0.040303 | 0.271877 | -3.93557 |
| ENST00000663935.1 | 1.274724 | 1.685949 | 2.672075 | 0.04031  | 0.271893 | -3.93577 |
| lnc-ART3-2:2      | 1.18971  | 3.415682 | 2.671497 | 0.04034  | 0.271962 | -3.93653 |
| NONHSAT179473.1   | 1.382529 | 2.852457 | 2.671414 | 0.040344 | 0.271962 | -3.93664 |
| NONHSAT213855.1   | 1.733471 | 2.136162 | 2.670176 | 0.040407 | 0.27222  | -3.93826 |
| NONHSAT196798.1   | -1.20231 | 2.973018 | -2.66894 | 0.040471 | 0.272466 | -3.93988 |
| NONHSAT205496.1   | -1.24689 | 2.09023  | -2.66873 | 0.040482 | 0.27252  | -3.94016 |
| NONHSAT179288.1   | 1.91676  | 3.144993 | 2.668658 | 0.040485 | 0.272526 | -3.94025 |
| ENST00000549251.1 | 1.376284 | 1.764943 | 2.667934 | 0.040522 | 0.272722 | -3.9412  |
| NONHSAT214082.1   | 1.014006 | 2.12833  | 2.667011 | 0.04057  | 0.272932 | -3.94241 |
| lnc-POFUT1-2:1    | 1.1279   | 1.990723 | 2.666707 | 0.040586 | 0.272996 | -3.94281 |
| lnc-SLC39A10-2:2  | 1.726436 | 2.897926 | 2.6655   | 0.040648 | 0.273127 | -3.9444  |
| NONHSAT186764.1   | -1.3842  | 2.761524 | -2.66544 | 0.040651 | 0.273131 | -3.94448 |
| NONHSAT203873.1   | 1.349643 | 2.235047 | 2.665145 | 0.040666 | 0.273188 | -3.94486 |



|                    |          |          |          |          |          |          |
|--------------------|----------|----------|----------|----------|----------|----------|
| ENST00000606194.1  | 1.490923 | 2.817569 | 2.664944 | 0.040676 | 0.273229 | -3.94513 |
| T226026            | 1.489422 | 2.237107 | 2.664486 | 0.0407   | 0.273326 | -3.94573 |
| lnc-PIP-1:1        | -1.26403 | 2.301284 | -2.66389 | 0.040731 | 0.273364 | -3.94651 |
| NONHSAT209663.1    | 1.149693 | 2.268671 | 2.663855 | 0.040733 | 0.273364 | -3.94655 |
| ENST00000662662.1  | -1.18843 | 2.383025 | -2.66289 | 0.040783 | 0.273559 | -3.94782 |
| NONHSAT169965.1    | 1.22649  | 1.680743 | 2.662646 | 0.040795 | 0.273607 | -3.94814 |
| MSTRG.57865.1      | 1.237496 | 2.077373 | 2.661745 | 0.040842 | 0.273724 | -3.94932 |
| lnc-ADAM18-2:2     | 1.101308 | 2.554707 | 2.661688 | 0.040845 | 0.273724 | -3.9494  |
| NONHSAT191694.1    | 1.038756 | 3.134024 | 2.66039  | 0.040912 | 0.273881 | -3.9511  |
| ENST00000602510.1  | 1.044516 | 4.392873 | 2.660203 | 0.040922 | 0.273892 | -3.95135 |
| NONHSAT161193.1    | 1.076924 | 4.815213 | 2.659184 | 0.040975 | 0.274049 | -3.95269 |
| lnc-PDK3-8:1       | -1.23805 | 3.542563 | -2.65913 | 0.040977 | 0.274049 | -3.95275 |
| ENST00000580326.1  | 1.284183 | 1.675428 | 2.659088 | 0.04098  | 0.274049 | -3.95281 |
| lnc-CXCL3-2:1      | -1.18038 | 3.920653 | -2.65867 | 0.041001 | 0.274052 | -3.95336 |
| lnc-USP20-1:1      | -1.60779 | 3.09337  | -2.65821 | 0.041026 | 0.27415  | -3.95397 |
| ENST00000606959.1  | -1.19432 | 3.249049 | -2.65743 | 0.041066 | 0.274286 | -3.95499 |
| lnc-BCL9L-2:1      | 1.131428 | 2.17782  | 2.657355 | 0.04107  | 0.274286 | -3.95509 |
| NONHSAT199680.1    | 1.335686 | 2.575095 | 2.657311 | 0.041072 | 0.274286 | -3.95515 |
| NONHSAT217982.1    | -1.05585 | 7.00261  | -2.6567  | 0.041104 | 0.274329 | -3.95595 |
| MSTRG.12436.2      | -1.1823  | 2.400011 | -2.65593 | 0.041144 | 0.274487 | -3.95696 |
| lnc-MTRNR2L13-11:1 | -1.02464 | 2.154793 | -2.65588 | 0.041147 | 0.274487 | -3.95702 |
| MSTRG.68534.1      | 1.306813 | 3.494746 | 2.655391 | 0.041172 | 0.27458  | -3.95767 |
| ENST00000572067.1  | -1.3723  | 2.827606 | -2.65509 | 0.041188 | 0.27458  | -3.95806 |
| lnc-KCTD15-2:3     | -1.07748 | 7.445015 | -2.65346 | 0.041274 | 0.274701 | -3.96021 |
| lnc-STX2-1:1       | -1.07711 | 4.238033 | -2.65274 | 0.041311 | 0.274767 | -3.96115 |
| MSTRG.35403.1      | 1.576276 | 2.20062  | 2.652546 | 0.041321 | 0.274797 | -3.9614  |
| NONHSAT189810.1    | 1.560831 | 2.665404 | 2.652032 | 0.041348 | 0.274832 | -3.96208 |
| NONHSAT156175.1    | -1.0096  | 2.563106 | -2.65172 | 0.041365 | 0.274891 | -3.9625  |
| NONHSAT177539.1    | 1.160751 | 2.053343 | 2.651233 | 0.04139  | 0.274911 | -3.96313 |
| lnc-RAB23-5:2      | 1.25655  | 2.707963 | 2.650676 | 0.04142  | 0.274998 | -3.96386 |
| lnc-ITGB8-4:1      | 1.543463 | 2.848419 | 2.649637 | 0.041474 | 0.275123 | -3.96522 |
| lnc-TUBB-17:1      | 1.200724 | 1.716578 | 2.649613 | 0.041476 | 0.275123 | -3.96526 |
| NONHSAT221027.1    | -1.09611 | 2.128142 | -2.64886 | 0.041515 | 0.275234 | -3.96625 |
| NONHSAT200153.1    | -1.05658 | 2.190258 | -2.6486  | 0.041529 | 0.275256 | -3.96658 |
| LINC00637:3        | 1.687081 | 3.408378 | 2.648538 | 0.041532 | 0.275256 | -3.96667 |
| NONHSAT171066.1    | 1.040229 | 1.657426 | 2.648236 | 0.041548 | 0.275294 | -3.96707 |
| ENST00000659612.1  | -1.06225 | 1.638099 | -2.64817 | 0.041551 | 0.275294 | -3.96715 |
| ENST00000653190.1  | -1.02447 | 4.04058  | -2.648   | 0.041561 | 0.275329 | -3.96738 |
| MSTRG.71226.1      | 1.489481 | 2.582426 | 2.647801 | 0.041571 | 0.275329 | -3.96764 |
| ENST00000420225.1  | 1.188602 | 2.522729 | 2.647726 | 0.041575 | 0.275329 | -3.96774 |
| MSTRG.20119.1      | 1.426843 | 1.80023  | 2.6476   | 0.041582 | 0.275329 | -3.9679  |
| NONHSAT201658.1    | 1.113828 | 2.479071 | 2.647582 | 0.041583 | 0.275329 | -3.96793 |
| NONHSAT187998.1    | -1.03015 | 2.626197 | -2.64723 | 0.041602 | 0.275371 | -3.96839 |
| lnc-MIA3-1:1       | 1.484625 | 3.049243 | 2.646841 | 0.041622 | 0.275433 | -3.9689  |
| NONHSAT161343.1    | -1.15389 | 2.893402 | -2.64585 | 0.041674 | 0.275617 | -3.9702  |
| ENST00000550506.2  | 1.334234 | 1.71659  | 2.645469 | 0.041694 | 0.275733 | -3.9707  |
| NONHSAT153049.1    | -1.17054 | 2.062006 | -2.64488 | 0.041726 | 0.275822 | -3.97148 |
| ENST00000513899.1  | 1.17406  | 2.271794 | 2.644721 | 0.041734 | 0.275822 | -3.97168 |

|                   |          |          |          |          |          |          |
|-------------------|----------|----------|----------|----------|----------|----------|
| lnc-SCGB2B2-10:2  | 1.038457 | 4.543396 | 2.643815 | 0.041782 | 0.276041 | -3.97288 |
| NR_125941         | 1.464851 | 2.616574 | 2.6437   | 0.041788 | 0.276042 | -3.97303 |
| NONHSAT158260.1   | 1.077627 | 2.015927 | 2.64345  | 0.041802 | 0.276042 | -3.97335 |
| lnc-MSX2-9:1      | -1.33346 | 2.672395 | -2.6431  | 0.04182  | 0.276111 | -3.97381 |
| lnc-KCNS2-5:3     | -1.37567 | 4.053162 | -2.64287 | 0.041833 | 0.276143 | -3.97412 |
| ENST00000579673.1 | 1.296172 | 2.772118 | 2.642607 | 0.041846 | 0.276143 | -3.97446 |
| NONHSAT167251.1   | -1.04149 | 5.188887 | -2.64255 | 0.04185  | 0.276143 | -3.97454 |
| lnc-PLAGL2-6:1    | -1.09104 | 5.478688 | -2.64176 | 0.041891 | 0.276256 | -3.97557 |
| NONHSAT220255.1   | 1.574896 | 2.910787 | 2.641673 | 0.041896 | 0.276266 | -3.97569 |
| ENST00000416842.1 | -1.01676 | 2.792589 | -2.64153 | 0.041904 | 0.276266 | -3.97587 |
| NONHSAT218822.1   | 1.292394 | 2.754222 | 2.640826 | 0.041941 | 0.276314 | -3.9768  |
| lnc-RNMT-2:2      | 1.212943 | 2.141573 | 2.640446 | 0.041962 | 0.276352 | -3.9773  |
| NONHSAT182881.1   | -1.19804 | 1.897676 | -2.6399  | 0.041991 | 0.276352 | -3.97803 |
| NONHSAT154407.1   | 1.164964 | 6.474619 | 2.639569 | 0.042008 | 0.27643  | -3.97846 |
| MSTRG.66984.1     | 1.106956 | 1.624223 | 2.638516 | 0.042065 | 0.276674 | -3.97984 |
| NONHSAT156173.1   | 1.275861 | 2.405395 | 2.637533 | 0.042117 | 0.276912 | -3.98113 |
| lnc-EAF1-3:1      | 1.049604 | 3.464729 | 2.637326 | 0.042128 | 0.276934 | -3.9814  |
| MSTRG.46435.2     | 1.107778 | 2.467128 | 2.63721  | 0.042135 | 0.276935 | -3.98156 |
| NONHSAT182887.1   | 1.188183 | 1.693053 | 2.637161 | 0.042137 | 0.276935 | -3.98162 |
| NONHSAT185920.1   | 1.105917 | 1.951092 | 2.634996 | 0.042253 | 0.277533 | -3.98447 |
| ENST00000554096.2 | 1.58719  | 2.82089  | 2.634952 | 0.042256 | 0.277533 | -3.98453 |
| MSTRG.53213.2     | 1.070946 | 2.203292 | 2.634348 | 0.042288 | 0.277566 | -3.98532 |
| ENST00000660197.1 | 1.236716 | 2.170229 | 2.634288 | 0.042291 | 0.277569 | -3.9854  |
| T070526           | 1.137068 | 4.696781 | 2.63381  | 0.042317 | 0.277631 | -3.98603 |
| lnc-PSD2-2:2      | -1.00595 | 2.824426 | -2.63381 | 0.042317 | 0.277631 | -3.98603 |
| lnc-HOXC13-1:2    | -1.07611 | 2.944896 | -2.63375 | 0.042321 | 0.277634 | -3.98611 |
| NONHSAT211225.1   | 1.253011 | 2.364388 | 2.633683 | 0.042324 | 0.277638 | -3.98619 |
| NONHSAT193294.1   | -1.14465 | 2.375554 | -2.63161 | 0.042436 | 0.27806  | -3.98892 |
| NONHSAT179024.1   | 1.117174 | 2.216621 | 2.631417 | 0.042446 | 0.27806  | -3.98918 |
| NONHSAT212092.1   | 1.054447 | 4.365404 | 2.631159 | 0.04246  | 0.278097 | -3.98951 |
| lnc-PRKACG-1:1    | 1.231966 | 2.768842 | 2.630723 | 0.042484 | 0.278124 | -3.99009 |
| T053049           | 1.25346  | 2.933988 | 2.629766 | 0.042535 | 0.278247 | -3.99135 |
| NONHSAT172339.1   | -1.12725 | 2.159146 | -2.62969 | 0.04254  | 0.278255 | -3.99145 |
| lnc-PRPS1-4:2     | 1.316453 | 2.866283 | 2.628259 | 0.042617 | 0.278492 | -3.99333 |
| MSTRG.65661.1     | 1.15294  | 2.469642 | 2.627535 | 0.042656 | 0.278622 | -3.99428 |
| lnc-ARHGAP21-4:1  | 1.061759 | 1.93495  | 2.626237 | 0.042727 | 0.27892  | -3.99599 |
| NONHSAT164902.1   | -1.30459 | 2.104956 | -2.6259  | 0.042745 | 0.278964 | -3.99643 |
| lnc-MAP2K4-3:4    | 1.290155 | 2.631395 | 2.625663 | 0.042758 | 0.278987 | -3.99674 |
| NONHSAT178466.1   | -1.07714 | 2.321756 | -2.62564 | 0.042759 | 0.278987 | -3.99677 |
| ENST00000423499.3 | -1.15902 | 3.13482  | -2.62553 | 0.042766 | 0.279005 | -3.99692 |
| NONHSAT167675.1   | 1.162873 | 4.297949 | 2.625297 | 0.042778 | 0.279005 | -3.99723 |
| ENST00000454135.1 | 1.298885 | 4.167173 | 2.624836 | 0.042803 | 0.279022 | -3.99783 |
| ENST00000652155.1 | -1.0099  | 3.862902 | -2.62472 | 0.04281  | 0.279022 | -3.99799 |
| NONHSAT211096.1   | 1.227131 | 2.881165 | 2.624694 | 0.042811 | 0.279022 | -3.99802 |
| NONHSAT199981.1   | 1.062162 | 3.44707  | 2.623842 | 0.042857 | 0.279176 | -3.99914 |
| lnc-SLC10A7-3:1   | -1.32026 | 2.989814 | -2.62251 | 0.04293  | 0.27949  | -4.00089 |
| NONHSAT174685.1   | -1.34085 | 3.139881 | -2.62237 | 0.042938 | 0.279521 | -4.00108 |
| NONHSAT153462.1   | -1.29312 | 2.880457 | -2.6214  | 0.042991 | 0.279723 | -4.00235 |

|                   |          |          |          |          |          |          |
|-------------------|----------|----------|----------|----------|----------|----------|
| MSTRG.39277.5     | -1.1946  | 4.16282  | -2.62102 | 0.043012 | 0.279764 | -4.00285 |
| lnc-TICRR-4:1     | -1.02565 | 3.453985 | -2.62014 | 0.04306  | 0.27995  | -4.00401 |
| MSTRG.24402.1     | -1.24272 | 2.156721 | -2.62    | 0.043068 | 0.27995  | -4.00419 |
| MSTRG.2824.1      | 1.005833 | 1.553416 | 2.619806 | 0.043078 | 0.28     | -4.00445 |
| lnc-CCT6B-2:1     | -1.10169 | 3.215536 | -2.61955 | 0.043093 | 0.280051 | -4.00479 |
| lnc-API5-10:1     | 2.071117 | 2.19688  | 2.618782 | 0.043135 | 0.280149 | -4.0058  |
| NONHSAT173378.1   | -1.08634 | 1.903572 | -2.61799 | 0.043178 | 0.280202 | -4.00684 |
| lnc-FBXO15-6:3    | -1.54856 | 2.990175 | -2.61754 | 0.043203 | 0.280234 | -4.00743 |
| lnc-PIGF-2:1      | -1.15367 | 2.200449 | -2.61682 | 0.043243 | 0.28032  | -4.00839 |
| NONHSAT156806.1   | 1.27802  | 2.568011 | 2.616547 | 0.043258 | 0.28032  | -4.00874 |
| NONHSAT171149.1   | 1.115969 | 2.494241 | 2.616159 | 0.043279 | 0.280366 | -4.00925 |
| lnc-CEP19-1:2     | -1.15199 | 4.125503 | -2.6148  | 0.043354 | 0.28059  | -4.01104 |
| NONHSAT200067.1   | 1.438038 | 1.796361 | 2.614141 | 0.043391 | 0.28069  | -4.01191 |
| NONHSAT151410.1   | 1.546547 | 3.130674 | 2.61392  | 0.043403 | 0.280751 | -4.0122  |
| MSTRG.38875.1     | 1.021104 | 4.385829 | 2.613755 | 0.043412 | 0.28078  | -4.01242 |
| lnc-TMEM177-3:3   | 1.049919 | 4.080402 | 2.613738 | 0.043413 | 0.28078  | -4.01244 |
| NONHSAT173237.1   | 1.035127 | 1.647281 | 2.61309  | 0.043449 | 0.28094  | -4.01329 |
| NONHSAT214113.1   | 1.001888 | 3.456827 | 2.612815 | 0.043464 | 0.281003 | -4.01366 |
| lnc-KIAA0319L-3:1 | 1.477429 | 2.54871  | 2.612441 | 0.043485 | 0.281073 | -4.01415 |
| ENST00000670548.1 | 1.318986 | 3.593724 | 2.611801 | 0.04352  | 0.281204 | -4.01499 |
| NONHSAT186445.1   | -1.0239  | 2.198302 | -2.61046 | 0.043594 | 0.281539 | -4.01675 |
| lnc-GLDC-8:2      | 1.026739 | 2.251352 | 2.609923 | 0.043625 | 0.281656 | -4.01746 |
| lnc-RCAN2-2:1     | -1.19027 | 2.526934 | -2.60982 | 0.04363  | 0.281656 | -4.0176  |
| NONHSAT161146.1   | 2.157714 | 3.99352  | 2.609616 | 0.043642 | 0.281656 | -4.01787 |
| NONHSAT181685.1   | -1.37187 | 3.449442 | -2.60954 | 0.043646 | 0.281656 | -4.01797 |
| lnc-LRCH2-3:1     | 1.001061 | 3.820461 | 2.608786 | 0.043688 | 0.281792 | -4.01896 |
| T081420           | -1.05774 | 2.153619 | -2.6087  | 0.043693 | 0.281792 | -4.01908 |
| lnc-NUB1-5:1      | -1.13219 | 3.41387  | -2.60834 | 0.043713 | 0.281814 | -4.01954 |
| NONHSAT154528.1   | -1.11562 | 2.496945 | -2.60705 | 0.043785 | 0.281901 | -4.02125 |
| lnc-WTAP-4:1      | 1.407911 | 2.335003 | 2.606731 | 0.043803 | 0.281928 | -4.02167 |
| NONHSAT217711.1   | -1.55508 | 2.551564 | -2.60523 | 0.043886 | 0.282083 | -4.02364 |
| NONHSAT177997.1   | 1.019447 | 2.631127 | 2.605072 | 0.043895 | 0.282083 | -4.02385 |
| NONHSAT221234.1   | 1.822991 | 2.645808 | 2.604941 | 0.043903 | 0.282083 | -4.02403 |
| NONHSAT190296.1   | 1.564404 | 3.643875 | 2.603868 | 0.043963 | 0.282291 | -4.02544 |
| NONHSAT180779.1   | 1.328264 | 1.741236 | 2.603731 | 0.04397  | 0.28232  | -4.02562 |
| NONHSAT206003.1   | 1.556771 | 2.47617  | 2.603577 | 0.043979 | 0.28232  | -4.02582 |
| NONHSAT205599.1   | 1.230458 | 3.41299  | 2.60291  | 0.044017 | 0.282412 | -4.0267  |
| MSTRG.45732.1     | 1.536414 | 2.305648 | 2.601404 | 0.044101 | 0.282712 | -4.02869 |
| ENST00000439928.2 | -1.58823 | 3.14073  | -2.60098 | 0.044125 | 0.282829 | -4.02924 |
| NONHSAT190171.1   | -1.05873 | 3.705127 | -2.60026 | 0.044166 | 0.282981 | -4.03019 |
| MSTRG.38905.1     | 1.126547 | 2.576624 | 2.599664 | 0.044199 | 0.283088 | -4.03098 |
| NONHSAT194118.1   | 1.237582 | 2.165607 | 2.599443 | 0.044212 | 0.283114 | -4.03127 |
| lnc-C5orf63-2:1   | 1.068957 | 2.060981 | 2.599094 | 0.044232 | 0.283123 | -4.03173 |
| NONHSAT154801.1   | 1.191772 | 1.75087  | 2.598636 | 0.044257 | 0.283173 | -4.03233 |
| lnc-PEPD-6:1      | -1.07126 | 6.676965 | -2.59786 | 0.044301 | 0.283232 | -4.03335 |
| NONHSAT158628.1   | -1.01828 | 5.306172 | -2.5978  | 0.044305 | 0.283232 | -4.03344 |
| NONHSAT150723.1   | 1.332053 | 2.625828 | 2.597776 | 0.044306 | 0.283232 | -4.03347 |
| NONHSAT196540.1   | -1.07896 | 3.629761 | -2.5977  | 0.04431  | 0.283232 | -4.03356 |

|                   |          |          |          |          |          |          |
|-------------------|----------|----------|----------|----------|----------|----------|
| MSTRG.26588.1     | -1.23401 | 3.860595 | -2.59702 | 0.044349 | 0.283368 | -4.03447 |
| ENST00000671430.1 | -1.08458 | 2.429648 | -2.597   | 0.04435  | 0.283368 | -4.03448 |
| MSTRG.32588.5     | 1.468988 | 2.64466  | 2.595961 | 0.044409 | 0.283441 | -4.03586 |
| lnc-SOD3-11:1     | 1.114333 | 2.054186 | 2.595906 | 0.044412 | 0.283441 | -4.03593 |
| NONHSAT219786.1   | 1.068817 | 3.461414 | 2.59586  | 0.044415 | 0.283441 | -4.03599 |
| MSTRG.33022.1     | 1.159184 | 4.204815 | 2.595445 | 0.044438 | 0.283483 | -4.03654 |
| NONHSAT154441.1   | -1.29392 | 3.282577 | -2.59493 | 0.044468 | 0.283564 | -4.03722 |
| NONHSAT189680.1   | -1.37635 | 3.455634 | -2.59324 | 0.044563 | 0.28389  | -4.03944 |
| lnc-MANEA-5:2     | 1.434802 | 2.319241 | 2.593181 | 0.044567 | 0.28389  | -4.03952 |
| NONHSAT194176.1   | 1.038592 | 3.560579 | 2.592611 | 0.044599 | 0.28399  | -4.04027 |
| NONHSAT217900.1   | -1.68732 | 3.431533 | -2.59251 | 0.044605 | 0.283992 | -4.04041 |
| ENST00000454735.1 | -1.37931 | 5.675957 | -2.59243 | 0.04461  | 0.284003 | -4.04052 |
| NONHSAT203336.1   | -1.4358  | 2.546849 | -2.59126 | 0.044676 | 0.284272 | -4.04205 |
| lnc-C12orf74-5:5  | 1.444993 | 2.596108 | 2.591113 | 0.044685 | 0.284272 | -4.04225 |
| MSTRG.51756.1     | 1.473243 | 2.661726 | 2.590385 | 0.044726 | 0.284304 | -4.04321 |
| MSTRG.4614.16     | 1.202428 | 3.974792 | 2.590346 | 0.044729 | 0.284304 | -4.04326 |
| lnc-ARL4C-11:1    | 1.447744 | 2.924306 | 2.58946  | 0.044779 | 0.284398 | -4.04443 |
| lnc-TMEM123-2:1   | 1.018388 | 1.596696 | 2.589259 | 0.044791 | 0.284398 | -4.04469 |
| lnc-RPAP1-1:5     | 1.464719 | 2.97077  | 2.589221 | 0.044793 | 0.284398 | -4.04474 |
| NONHSAT191604.1   | 1.070046 | 1.804411 | 2.589022 | 0.044804 | 0.284416 | -4.04501 |
| ENST00000521245.2 | 1.094159 | 2.554436 | 2.588741 | 0.04482  | 0.284446 | -4.04538 |
| lnc-HECTD2-1:1    | -1.69753 | 3.263433 | -2.58748 | 0.044892 | 0.284581 | -4.04703 |
| NONHSAT157898.1   | 1.51728  | 2.917563 | 2.587054 | 0.044917 | 0.284632 | -4.0476  |
| NONHSAT206627.1   | 1.099126 | 1.729065 | 2.587028 | 0.044919 | 0.284632 | -4.04764 |
| ENST00000657385.1 | 1.686718 | 4.272502 | 2.5869   | 0.044926 | 0.284632 | -4.0478  |
| lnc-ZNF469-3:1    | 1.325595 | 3.838501 | 2.58571  | 0.044994 | 0.284967 | -4.04937 |
| NONHSAT163322.1   | 1.342289 | 2.006974 | 2.584443 | 0.045067 | 0.285205 | -4.05105 |
| MSTRG.50166.3     | 1.536699 | 2.969233 | 2.583882 | 0.0451   | 0.285317 | -4.05178 |
| MSTRG.11972.1     | 1.532665 | 2.312951 | 2.58353  | 0.04512  | 0.285359 | -4.05225 |
| T230105           | 1.059782 | 1.573305 | 2.581132 | 0.045259 | 0.285658 | -4.05541 |
| MSTRG.43200.1     | 1.069258 | 1.746351 | 2.581096 | 0.045261 | 0.285658 | -4.05546 |
| NONHSAT174554.1   | -1.03204 | 3.054439 | -2.57828 | 0.045424 | 0.286204 | -4.05917 |
| lnc-C5orf46-1:1   | -1.2645  | 2.699425 | -2.57782 | 0.04545  | 0.286247 | -4.05978 |
| ENST00000615088.1 | -1.00015 | 2.451268 | -2.5761  | 0.045551 | 0.286469 | -4.06206 |
| lnc-ANO3-5:1      | 1.801013 | 2.780386 | 2.575429 | 0.04559  | 0.286588 | -4.06294 |
| NONHSAT222036.1   | -1.20863 | 2.350355 | -2.57522 | 0.045602 | 0.286614 | -4.06322 |
| T056769           | -1.40072 | 2.995793 | -2.57462 | 0.045637 | 0.286743 | -4.06401 |
| NONHSAT165415.1   | 1.302181 | 4.278623 | 2.574474 | 0.045646 | 0.286744 | -4.0642  |
| NONHSAT148744.1   | 1.800023 | 2.79405  | 2.573515 | 0.045702 | 0.286923 | -4.06546 |
| MSTRG.61503.1     | -1.51388 | 2.738522 | -2.5735  | 0.045703 | 0.286923 | -4.06549 |
| NONHSAT172294.1   | 1.383498 | 1.792052 | 2.573203 | 0.04572  | 0.286941 | -4.06587 |
| NONHSAT208255.1   | -1.12314 | 2.456044 | -2.57319 | 0.045721 | 0.286941 | -4.06589 |
| lnc-CLRN2-5:2     | 1.27968  | 3.107576 | 2.573144 | 0.045723 | 0.286941 | -4.06595 |
| ENST00000561800.1 | -1.58119 | 2.605015 | -2.57276 | 0.045746 | 0.286997 | -4.06646 |
| NONHSAT215341.1   | 1.262617 | 1.919081 | 2.572462 | 0.045763 | 0.287053 | -4.06685 |
| NONHSAT162470.1   | 1.275813 | 2.625749 | 2.572073 | 0.045786 | 0.287128 | -4.06737 |
| NONHSAT154620.1   | 1.261624 | 3.349342 | 2.572062 | 0.045787 | 0.287128 | -4.06738 |
| NONHSAT161335.1   | -1.09218 | 2.08313  | -2.57123 | 0.045836 | 0.287339 | -4.06848 |

|                   |          |          |          |          |          |          |
|-------------------|----------|----------|----------|----------|----------|----------|
| lnc-ZDHHC17-11:1  | 1.450357 | 1.834248 | 2.570201 | 0.045896 | 0.287584 | -4.06984 |
| T113305           | -1.11551 | 4.213103 | -2.56941 | 0.045942 | 0.287707 | -4.07088 |
| NONHSAT204247.1   | 1.306988 | 3.068375 | 2.569373 | 0.045945 | 0.287707 | -4.07093 |
| NONHSAT167068.1   | -1.12969 | 3.010932 | -2.56833 | 0.046006 | 0.287888 | -4.0723  |
| NONHSAT210794.1   | -1.57323 | 2.338139 | -2.56818 | 0.046015 | 0.287888 | -4.0725  |
| NONHSAT203953.1   | 1.244317 | 1.650404 | 2.568155 | 0.046016 | 0.287888 | -4.07254 |
| ENST00000653696.1 | 1.060905 | 4.419595 | 2.566688 | 0.046103 | 0.288196 | -4.07447 |
| NR_033977         | 1.206539 | 2.567611 | 2.56593  | 0.046148 | 0.288405 | -4.07548 |
| NONHSAT206367.1   | 1.029863 | 5.291648 | 2.565486 | 0.046174 | 0.288469 | -4.07606 |
| lnc-RPS6KA2-2:1   | 1.0998   | 2.11699  | 2.565257 | 0.046188 | 0.288493 | -4.07636 |
| lnc-FOXF2-4:1     | -1.37897 | 3.399802 | -2.56452 | 0.046231 | 0.28864  | -4.07734 |
| ENST00000554737.2 | -1.21936 | 2.416388 | -2.56422 | 0.046249 | 0.288698 | -4.07773 |
| lnc-ATP6AP2-11:1  | 1.446185 | 1.80688  | 2.563755 | 0.046277 | 0.28878  | -4.07835 |
| lnc-KDM4B-1:1     | 1.790053 | 3.230453 | 2.563333 | 0.046302 | 0.288856 | -4.0789  |
| NR_110201         | 1.358662 | 2.918756 | 2.562942 | 0.046325 | 0.288951 | -4.07942 |
| NONHSAT165224.1   | -1.14591 | 2.31608  | -2.5624  | 0.046357 | 0.289069 | -4.08014 |
| lnc-DENND1B-6:2   | 1.367654 | 2.850624 | 2.561872 | 0.046388 | 0.289156 | -4.08083 |
| NONHSAT164372.1   | -1.28246 | 2.20803  | -2.5615  | 0.04641  | 0.289194 | -4.08132 |
| MSTRG.51542.1     | 1.583785 | 2.47035  | 2.561142 | 0.046432 | 0.289194 | -4.0818  |
| lnc-ECSCR-3:1     | -1.28693 | 2.570178 | -2.5608  | 0.046452 | 0.289257 | -4.08224 |
| MIR4527HG:18      | 1.450378 | 2.912625 | 2.560528 | 0.046468 | 0.289278 | -4.08261 |
| ENST00000301683.7 | -1.06186 | 4.115471 | -2.5589  | 0.046565 | 0.289562 | -4.08476 |
| lnc-CCT5-28:1     | 1.837696 | 2.208138 | 2.558156 | 0.04661  | 0.289639 | -4.08574 |
| ENST00000653016.1 | 1.640136 | 2.571323 | 2.557852 | 0.046628 | 0.289648 | -4.08614 |
| NR_125864         | 1.303347 | 2.907951 | 2.557645 | 0.04664  | 0.289706 | -4.08642 |
| NONHSAT219739.1   | 1.395389 | 2.612376 | 2.557546 | 0.046646 | 0.289724 | -4.08655 |
| lnc-NOL11-4:2     | 1.928817 | 2.372539 | 2.556521 | 0.046708 | 0.289802 | -4.0879  |
| lnc-RTP5-3:2      | 1.550284 | 3.208105 | 2.554356 | 0.046837 | 0.290304 | -4.09076 |
| NONHSAT163641.1   | -1.04693 | 1.881478 | -2.55398 | 0.04686  | 0.290316 | -4.09125 |
| NONHSAT166893.1   | 1.129228 | 2.283082 | 2.553495 | 0.046889 | 0.290428 | -4.0919  |
| lnc-SNAP47-1:1    | -1.14697 | 6.340727 | -2.55303 | 0.046917 | 0.290483 | -4.09251 |
| NONHSAT152050.1   | 1.5843   | 1.872412 | 2.552853 | 0.046928 | 0.290507 | -4.09275 |
| lnc-EXT1-5:1      | -1.0469  | 2.382766 | -2.55234 | 0.046959 | 0.290553 | -4.09343 |
| lnc-CDC42EP3-2:1  | 1.69868  | 2.888088 | 2.552071 | 0.046975 | 0.290553 | -4.09378 |
| NONHSAT156616.1   | -1.16723 | 2.160343 | -2.55201 | 0.046978 | 0.290553 | -4.09386 |
| MSTRG.24872.1     | -1.15108 | 2.773648 | -2.55169 | 0.046998 | 0.290553 | -4.09429 |
| NONHSAT210357.1   | 1.109004 | 3.964496 | 2.551652 | 0.047    | 0.290553 | -4.09433 |
| lnc-BZW1-3:1      | 1.299933 | 2.580319 | 2.55152  | 0.047008 | 0.290553 | -4.09451 |
| ENST00000584078.1 | -1.1296  | 2.245038 | -2.55137 | 0.047017 | 0.290553 | -4.09471 |
| NR_103827         | 1.081043 | 5.581633 | 2.551132 | 0.047031 | 0.29056  | -4.09502 |
| MSTRG.46666.1     | 1.898249 | 2.695077 | 2.551084 | 0.047034 | 0.29056  | -4.09508 |
| NONHSAT204827.1   | 1.127735 | 3.413638 | 2.550621 | 0.047062 | 0.290679 | -4.09569 |
| NONHSAT197162.1   | -1.08233 | 1.742727 | -2.55033 | 0.04708  | 0.290741 | -4.09608 |
| NONHSAT177691.1   | 1.5015   | 1.805101 | 2.549811 | 0.047111 | 0.290821 | -4.09677 |
| NONHSAT153829.1   | 1.450163 | 2.475599 | 2.549707 | 0.047118 | 0.290837 | -4.0969  |
| MSTRG.26270.2     | 1.615197 | 2.989577 | 2.549626 | 0.047122 | 0.290837 | -4.09701 |
| NONHSAT182289.1   | -1.09722 | 1.702712 | -2.54929 | 0.047143 | 0.290928 | -4.09746 |
| NONHSAT219906.1   | 1.180096 | 2.660372 | 2.549098 | 0.047154 | 0.290959 | -4.09771 |

|                   |          |          |          |          |          |          |
|-------------------|----------|----------|----------|----------|----------|----------|
| NONHSAT193405.1   | 1.327967 | 3.098535 | 2.548424 | 0.047195 | 0.29108  | -4.0986  |
| ENST00000609583.1 | 1.261589 | 2.071678 | 2.548313 | 0.047202 | 0.29108  | -4.09874 |
| lnc-PACRGL-10:1   | 1.43156  | 2.518445 | 2.547976 | 0.047222 | 0.291159 | -4.09919 |
| NONHSAT165148.1   | 1.003115 | 3.708496 | 2.547905 | 0.047227 | 0.291159 | -4.09928 |
| ENST00000523881.1 | -1.2228  | 6.007009 | -2.54782 | 0.047232 | 0.291174 | -4.0994  |
| lnc-BMPER-4:1     | 1.101099 | 2.414015 | 2.546179 | 0.047331 | 0.291502 | -4.10157 |
| NONHSAT204962.1   | -1.53009 | 3.53487  | -2.5461  | 0.047336 | 0.291504 | -4.10167 |
| lnc-RSPH14-7:1    | -1.06632 | 1.931701 | -2.54538 | 0.04738  | 0.291653 | -4.10263 |
| NONHSAT161144.1   | 1.615845 | 2.589491 | 2.545342 | 0.047382 | 0.291653 | -4.10267 |
| T034024           | -1.0357  | 2.30332  | -2.54443 | 0.047438 | 0.291793 | -4.10387 |
| lnc-TECRL-12:1    | -1.31342 | 4.680054 | -2.54348 | 0.047495 | 0.291995 | -4.10513 |
| NONHSAT193018.1   | -1.00262 | 4.299152 | -2.54257 | 0.047551 | 0.29222  | -4.10633 |
| MSTRG.19174.1     | 1.351506 | 2.939481 | 2.541737 | 0.047602 | 0.292439 | -4.10744 |
| NONHSAT167414.1   | -1.4743  | 3.165817 | -2.54173 | 0.047602 | 0.292439 | -4.10745 |
| NONHSAT153966.1   | 1.220336 | 2.660393 | 2.541063 | 0.047643 | 0.292582 | -4.10833 |
| NONHSAT181993.1   | 1.537635 | 2.936283 | 2.539192 | 0.047758 | 0.292937 | -4.1108  |
| MSTRG.61389.2     | 1.351624 | 3.787082 | 2.538526 | 0.047799 | 0.293079 | -4.11168 |
| NONHSAT197496.1   | 1.230202 | 2.127049 | 2.538397 | 0.047807 | 0.293079 | -4.11185 |
| lnc-COX19-1:1     | 1.072284 | 2.744998 | 2.53801  | 0.04783  | 0.29312  | -4.11236 |
| NONHSAT223967.1   | 1.327654 | 5.396898 | 2.537806 | 0.047843 | 0.293148 | -4.11263 |
| MSTRG.35288.1     | -1.05871 | 3.262377 | -2.53772 | 0.047848 | 0.293164 | -4.11275 |
| NONHSAT206905.1   | 1.041275 | 2.457623 | 2.536929 | 0.047897 | 0.293267 | -4.11379 |
| MSTRG.69589.1     | 1.199631 | 2.576477 | 2.536534 | 0.047921 | 0.293281 | -4.11431 |
| NONHSAT199196.1   | -1.2529  | 2.053638 | -2.53643 | 0.047927 | 0.293281 | -4.11445 |
| NONHSAT224494.1   | 1.22547  | 2.115785 | 2.536398 | 0.047929 | 0.293281 | -4.11449 |
| NONHSAT193028.1   | 1.282535 | 2.048561 | 2.535727 | 0.047971 | 0.293412 | -4.11538 |
| lnc-CCKAR-1:13    | -1.01968 | 4.379405 | -2.53433 | 0.048057 | 0.293588 | -4.11723 |
| MSTRG.29057.151   | 1.145716 | 4.743882 | 2.533244 | 0.048124 | 0.293729 | -4.11867 |
| lnc-POU6F2-1:1    | 1.318109 | 2.951417 | 2.532893 | 0.048146 | 0.293754 | -4.11913 |
| NONHSAT213668.1   | -1.1356  | 2.577141 | -2.53287 | 0.048147 | 0.293754 | -4.11916 |
| NONHSAT173171.1   | 2.576782 | 3.798042 | 2.532724 | 0.048156 | 0.293754 | -4.11935 |
| ENST00000671426.1 | 1.20374  | 2.425474 | 2.53269  | 0.048158 | 0.293754 | -4.1194  |
| MSTRG.30060.1     | 1.261982 | 2.163183 | 2.531828 | 0.048212 | 0.293912 | -4.12054 |
| NR_125422         | -1.27202 | 2.374316 | -2.53172 | 0.048218 | 0.293912 | -4.12068 |
| ENST00000427173.1 | 1.189051 | 2.331253 | 2.531159 | 0.048253 | 0.293947 | -4.12142 |
| NONHSAT158403.1   | 1.330865 | 7.665768 | 2.530902 | 0.048269 | 0.293974 | -4.12176 |
| MSTRG.56289.1     | 1.198023 | 1.671977 | 2.529631 | 0.048348 | 0.294238 | -4.12344 |
| NONHSAT210575.1   | 1.184258 | 2.386519 | 2.529554 | 0.048353 | 0.294238 | -4.12355 |
| NONHSAT164735.1   | -1.46233 | 4.897545 | -2.52955 | 0.048353 | 0.294238 | -4.12355 |
| NONHSAT194894.1   | -1.09826 | 2.315921 | -2.52914 | 0.048378 | 0.294301 | -4.12409 |
| MSTRG.34306.1     | 1.426302 | 2.680975 | 2.528837 | 0.048397 | 0.294346 | -4.12449 |
| NONHSAT193350.1   | 1.113338 | 2.012922 | 2.528224 | 0.048436 | 0.294507 | -4.12531 |
| CNTFR-AS1:14      | 1.324033 | 2.373969 | 2.527392 | 0.048487 | 0.294702 | -4.12641 |
| ENST00000622466.1 | 1.045136 | 3.859721 | 2.525779 | 0.048588 | 0.294998 | -4.12854 |
| NONHSAT198089.1   | 1.8887   | 2.47344  | 2.525463 | 0.048608 | 0.294998 | -4.12896 |
| lnc-CNOT1-2:1     | -1.46727 | 2.898419 | -2.52544 | 0.048609 | 0.294998 | -4.12899 |
| NONHSAT171467.1   | 1.260571 | 2.901358 | 2.525187 | 0.048625 | 0.295055 | -4.12932 |
| lnc-BBIP1-8:1     | -1.02305 | 5.79999  | -2.525   | 0.048637 | 0.295076 | -4.12957 |

|                   |          |          |          |          |          |          |
|-------------------|----------|----------|----------|----------|----------|----------|
| NONHSAT174094.1   | 1.505862 | 2.269757 | 2.523276 | 0.048745 | 0.29547  | -4.13185 |
| lnc-KCTD17-3:1    | -1.08836 | 8.255036 | -2.52256 | 0.04879  | 0.295529 | -4.1328  |
| NONHSAT198406.1   | -1.30017 | 2.953658 | -2.5221  | 0.048819 | 0.295543 | -4.13341 |
| ENST00000455498.1 | 1.116402 | 2.439289 | 2.521683 | 0.048845 | 0.29559  | -4.13396 |
| NONHSAT153635.1   | -1.33149 | 4.802719 | -2.52033 | 0.04893  | 0.295825 | -4.13575 |
| ENST00000514877.2 | 1.084666 | 1.744512 | 2.520311 | 0.048931 | 0.295825 | -4.13577 |
| NONHSAT167424.1   | -1.15438 | 2.144759 | -2.52016 | 0.048941 | 0.295843 | -4.13598 |
| MSTRG.20397.1     | 1.690188 | 1.902877 | 2.519843 | 0.048961 | 0.295845 | -4.13639 |
| NONHSAT164713.1   | -1.25151 | 4.795266 | -2.51969 | 0.04897  | 0.295862 | -4.1366  |
| lnc-GPR132-1:1    | 1.834406 | 2.689211 | 2.518204 | 0.049064 | 0.296113 | -4.13856 |
| NONHSAT201797.1   | 1.280656 | 2.578479 | 2.517958 | 0.049079 | 0.296136 | -4.13889 |
| NONHSAT210826.1   | 1.346935 | 1.706044 | 2.517162 | 0.04913  | 0.29628  | -4.13994 |
| MSTRG.47000.33    | -1.04566 | 5.853752 | -2.51703 | 0.049138 | 0.296313 | -4.14012 |
| lnc-EPB41L2-2:1   | -1.23846 | 2.760836 | -2.51662 | 0.049164 | 0.296396 | -4.14065 |
| T302058           | 1.112578 | 2.490976 | 2.516143 | 0.049194 | 0.296527 | -4.14129 |
| ENST00000412654.1 | 1.100493 | 4.016644 | 2.515754 | 0.049219 | 0.296534 | -4.14181 |
| lnc-SATB1-4:1     | 1.356305 | 3.756436 | 2.515706 | 0.049222 | 0.296534 | -4.14187 |
| ENST00000652589.1 | -1.49271 | 7.087964 | -2.51537 | 0.049243 | 0.296575 | -4.14232 |
| MSTRG.8945.1      | 1.719879 | 3.222437 | 2.515099 | 0.04926  | 0.296575 | -4.14267 |
| NONHSAT153716.1   | 1.627791 | 2.767142 | 2.514728 | 0.049284 | 0.296624 | -4.14316 |
| MSTRG.64535.1     | -1.03703 | 2.53222  | -2.51351 | 0.049361 | 0.296911 | -4.14477 |
| lnc-GPATCH1-1:1   | 1.146861 | 1.835167 | 2.513199 | 0.049381 | 0.296953 | -4.14519 |
| NONHSAT166070.1   | -1.13359 | 5.600107 | -2.51317 | 0.049383 | 0.296953 | -4.14522 |
| T314979           | 1.384394 | 2.339773 | 2.512951 | 0.049397 | 0.296971 | -4.14552 |
| lnc-CLIC5-2:1     | -1.30508 | 3.00244  | -2.51193 | 0.049461 | 0.297144 | -4.14686 |
| lnc-EIPR1-8:1     | 1.118087 | 2.64385  | 2.511923 | 0.049462 | 0.297144 | -4.14688 |
| ENST00000661978.1 | -1.05551 | 1.941254 | -2.51188 | 0.049465 | 0.297144 | -4.14693 |
| lnc-AKR1E2-16:1   | 1.966242 | 3.29493  | 2.511776 | 0.049472 | 0.297156 | -4.14707 |
| MSTRG.54854.17    | 1.120431 | 2.381218 | 2.511685 | 0.049477 | 0.29716  | -4.14719 |
| NONHSAT206427.1   | 1.149939 | 2.133856 | 2.511134 | 0.049512 | 0.29724  | -4.14792 |
| NONHSAT161187.1   | 1.625733 | 1.838518 | 2.511029 | 0.049519 | 0.29724  | -4.14806 |
| NONHSAT158640.1   | -1.22027 | 2.430294 | -2.51099 | 0.049522 | 0.29724  | -4.14812 |
| lnc-RASEF-2:1     | 1.213267 | 1.67855  | 2.510758 | 0.049536 | 0.297275 | -4.14842 |
| MSTRG.21016.1     | -1.04869 | 3.702913 | -2.51043 | 0.049557 | 0.29731  | -4.14885 |
| lnc-SLC25A29-2:1  | -1.11541 | 1.673693 | -2.50895 | 0.049652 | 0.297527 | -4.15081 |
| NR_026760         | 1.46379  | 2.311755 | 2.508947 | 0.049652 | 0.297527 | -4.15082 |
| MSTRG.8195.1      | -1.2389  | 3.137478 | -2.50868 | 0.049669 | 0.297576 | -4.15117 |
| NONHSAT154087.1   | 1.309509 | 2.162105 | 2.508532 | 0.049679 | 0.297597 | -4.15137 |
| lnc-SMIM33-1:1    | -1.03329 | 2.275862 | -2.50766 | 0.049734 | 0.297767 | -4.15252 |
| lnc-CTH-14:1      | 1.189557 | 2.395604 | 2.506935 | 0.049781 | 0.297855 | -4.15348 |
| NONHSAT173575.1   | -1.00598 | 1.810289 | -2.50651 | 0.049808 | 0.297914 | -4.15405 |
| lnc-SCTR-2:4      | -1.3385  | 3.219368 | -2.50572 | 0.049859 | 0.298078 | -4.15509 |
| NONHSAT205238.1   | 1.267357 | 2.657079 | 2.505711 | 0.04986  | 0.298078 | -4.1551  |
| lnc-KLF4-11:1     | -1.11814 | 2.216664 | -2.50559 | 0.049867 | 0.29809  | -4.15526 |
| NONHSAT201690.1   | -1.10374 | 3.169325 | -2.50529 | 0.049886 | 0.298098 | -4.15565 |
| MSTRG.65885.2     | 1.442445 | 2.830689 | 2.504889 | 0.049912 | 0.298109 | -4.15619 |
| lnc-PLET1-7:1     | 1.422137 | 5.142744 | 2.504353 | 0.049947 | 0.298193 | -4.1569  |
| NONHSAT206486.1   | 1.292436 | 2.950502 | 2.504071 | 0.049965 | 0.298201 | -4.15727 |

|                 |          |          |          |          |          |          |
|-----------------|----------|----------|----------|----------|----------|----------|
| MSTRG.62230.27  | 1.022482 | 3.550632 | 2.504    | 0.04997  | 0.298201 | -4.15737 |
| NONHSAT168621.1 | -1.40573 | 2.835039 | -2.50374 | 0.049986 | 0.298233 | -4.15771 |

Table S4. significant different expression of lncRNA after glucose deprivation compared to



controls.

| LncRNA            | logFC    | AveExpr  | t        | P.Value  | adj.P.Val | B        |
|-------------------|----------|----------|----------|----------|-----------|----------|
| lnc-TEX2-1:1      | 2.983421 | 2.554823 | 24.32173 | 7.56E-07 | 0.025848  | 5.434501 |
| lnc-HTR3D-2:1     | 3.514912 | 6.306772 | 24.12824 | 7.90E-07 | 0.025848  | 5.415234 |
| NONHSAT168904.1   | 2.443664 | 2.243122 | 21.8448  | 1.36E-06 | 0.025848  | 5.159426 |
| lnc-THBS1-5:1     | -3.04458 | 3.759083 | -21.8027 | 1.38E-06 | 0.025848  | 5.154168 |
| ENST00000564240.1 | -2.83514 | 2.544331 | -21.5022 | 1.49E-06 | 0.025848  | 5.115993 |
| NONHSAT156824.1   | 2.275324 | 2.257939 | 20.30389 | 2.04E-06 | 0.025848  | 4.951989 |
| NONHSAT196599.1   | 2.026559 | 2.109175 | 20.09438 | 2.16E-06 | 0.025848  | 4.921242 |
| NONHSAT182696.1   | 2.675269 | 2.444138 | 19.37668 | 2.63E-06 | 0.025848  | 4.810808 |
| NONHSAT168006.1   | 2.478441 | 2.380344 | 19.29177 | 2.69E-06 | 0.025848  | 4.797198 |
| ENST00000657119.1 | 2.700027 | 2.410614 | 19.27067 | 2.71E-06 | 0.025848  | 4.793797 |
| MSTRG.5623.1      | 2.042337 | 8.04608  | 19.13271 | 2.82E-06 | 0.025848  | 4.771377 |
| lnc-GADD45A-4:1   | 2.048874 | 8.812479 | 18.09158 | 3.83E-06 | 0.028213  | 4.59135  |
| NONHSAT214950.1   | 1.892876 | 1.999034 | 17.42857 | 4.70E-06 | 0.028213  | 4.465904 |
| MSTRG.16199.1     | 2.122871 | 2.15423  | 17.41101 | 4.72E-06 | 0.028213  | 4.462459 |
| lnc-CERK-17:1     | 2.58725  | 2.441959 | 17.20089 | 5.04E-06 | 0.028213  | 4.420717 |
| lnc-TRIM27-18:1   | 2.382683 | 2.263464 | 17.12432 | 5.17E-06 | 0.028213  | 4.405267 |
| NR_103827         | 2.180638 | 6.131431 | 16.74291 | 5.84E-06 | 0.028213  | 4.326355 |
| MSTRG.55066.1     | 2.024208 | 2.102626 | 16.73339 | 5.86E-06 | 0.028213  | 4.324343 |
| MSTRG.16713.1     | 1.713966 | 5.905734 | 16.51682 | 6.29E-06 | 0.028213  | 4.277995 |
| NONHSAT221845.1   | -1.75717 | 1.999598 | -16.4361 | 6.46E-06 | 0.028213  | 4.260423 |
| NONHSAT153565.1   | 2.400845 | 2.479404 | 16.34239 | 6.67E-06 | 0.028213  | 4.239848 |
| NONHSAT218416.1   | 1.819418 | 2.035424 | 16.19926 | 7.00E-06 | 0.028213  | 4.20799  |
| ENST00000601618.1 | -1.74057 | 2.053329 | -15.9788 | 7.54E-06 | 0.028213  | 4.157911 |
| NONHSAT199539.1   | 2.209574 | 2.425781 | 15.9615  | 7.58E-06 | 0.028213  | 4.153932 |
| ENST00000621389.1 | 2.904388 | 7.065098 | 15.89342 | 7.76E-06 | 0.028213  | 4.138187 |
| lnc-MPLKIP-13:1   | 1.654209 | 3.561919 | 15.72276 | 8.23E-06 | 0.028213  | 4.098179 |
| NONHSAT156259.1   | 2.457714 | 2.311418 | 15.62842 | 8.50E-06 | 0.028213  | 4.075733 |
| NONHSAT197062.1   | 1.67482  | 1.927577 | 15.58865 | 8.62E-06 | 0.028213  | 4.066195 |
| T345203           | 2.55442  | 6.181447 | 15.54243 | 8.76E-06 | 0.028213  | 4.055061 |
| NONHSAT172926.1   | 1.79272  | 2.698218 | 15.41428 | 9.17E-06 | 0.028213  | 4.023878 |
| NONHSAT212969.1   | 2.510794 | 2.280484 | 15.24094 | 9.75E-06 | 0.028213  | 3.98097  |
| MSTRG.37340.2     | -1.86706 | 2.109082 | -15.0581 | 1.04E-05 | 0.028213  | 3.934788 |
| MSTRG.59871.1     | 2.25393  | 2.298128 | 14.96224 | 1.08E-05 | 0.028213  | 3.910171 |
| ENST00000579752.1 | 2.287983 | 2.228243 | 14.9618  | 1.08E-05 | 0.028213  | 3.910056 |
| NONHSAT204602.1   | 1.971149 | 2.046468 | 14.94989 | 1.08E-05 | 0.028213  | 3.906981 |
| lnc-ABCG5-3:1     | 2.174992 | 2.197504 | 14.80061 | 1.14E-05 | 0.028213  | 3.868059 |
| NR_004383         | -1.90709 | 9.613983 | -14.7813 | 1.15E-05 | 0.028213  | 3.862986 |
| ENST00000423942.1 | 2.122581 | 2.23806  | 14.76373 | 1.16E-05 | 0.028213  | 3.85834  |
| lnc-NUDT2-5:1     | 2.06774  | 2.114217 | 14.69548 | 1.19E-05 | 0.028213  | 3.840243 |
| ENST00000520588.1 | -1.88823 | 3.881836 | -14.4728 | 1.29E-05 | 0.028213  | 3.7802   |
| MSTRG.19613.1     | -2.35613 | 2.315169 | -14.4403 | 1.31E-05 | 0.028213  | 3.771305 |
| NR_029487         | -1.66568 | 1.912265 | -14.4179 | 1.32E-05 | 0.028213  | 3.765142 |
| NONHSAT205228.1   | 2.152009 | 7.159414 | 14.39563 | 1.33E-05 | 0.028213  | 3.759014 |
| MSTRG.61229.1     | -1.72394 | 3.609143 | -14.3882 | 1.33E-05 | 0.028213  | 3.756963 |
| lnc-MRPL33-2:1    | -2.01513 | 3.041181 | -14.3572 | 1.35E-05 | 0.028213  | 3.748394 |
| ENST00000670395.1 | 2.001442 | 2.102346 | 14.34036 | 1.36E-05 | 0.028213  | 3.743728 |

|                   |          |          |          |          |          |          |
|-------------------|----------|----------|----------|----------|----------|----------|
| lnc-ZC3H12D-2:2   | 1.71846  | 1.974844 | 14.32013 | 1.37E-05 | 0.028213 | 3.738108 |
| lnc-PHF24-1:1     | 1.548532 | 1.887667 | 14.30073 | 1.38E-05 | 0.028213 | 3.732707 |
| NONHSAT156871.1   | 2.284337 | 2.436341 | 14.26652 | 1.39E-05 | 0.028213 | 3.723153 |
| MSTRG.48086.1     | 1.986315 | 2.040705 | 14.17845 | 1.44E-05 | 0.028213 | 3.698376 |
| NONHSAT167997.1   | 2.238702 | 2.501092 | 14.1275  | 1.47E-05 | 0.028213 | 3.683926 |
| NONHSAT208879.1   | 2.258051 | 2.190899 | 14.1214  | 1.47E-05 | 0.028213 | 3.682191 |
| lnc-ACAD11-2:1    | 1.8249   | 2.001203 | 14.05676 | 1.51E-05 | 0.028213 | 3.663718 |
| NR_125940         | 1.674915 | 1.851487 | 13.99587 | 1.55E-05 | 0.028213 | 3.646189 |
| lnc-NDUFB4-5:1    | -2.22519 | 2.35712  | -13.8864 | 1.61E-05 | 0.028213 | 3.614361 |
| MSTRG.52989.1     | 1.850701 | 4.937992 | 13.79138 | 1.68E-05 | 0.028213 | 3.586387 |
| NONHSAT156002.1   | -1.45553 | 6.078459 | -13.7811 | 1.68E-05 | 0.028213 | 3.583347 |
| NONHSAT217334.1   | 1.64067  | 1.915789 | 13.74976 | 1.70E-05 | 0.028213 | 3.574035 |
| NONHSAT177733.1   | 2.232657 | 3.121165 | 13.72792 | 1.72E-05 | 0.028213 | 3.567529 |
| LINC01020:9       | 1.44747  | 1.774878 | 13.69132 | 1.74E-05 | 0.028213 | 3.556589 |
| MSTRG.16372.1     | 1.989457 | 2.140678 | 13.66575 | 1.76E-05 | 0.028213 | 3.548919 |
| NONHSAT195823.1   | 2.204197 | 2.503484 | 13.66229 | 1.76E-05 | 0.028213 | 3.547879 |
| NONHSAT156470.1   | -1.71621 | 4.161339 | -13.6398 | 1.78E-05 | 0.028213 | 3.541098 |
| lnc-DUSP14-1:1    | 1.772244 | 6.001942 | 13.62282 | 1.79E-05 | 0.028213 | 3.535986 |
| NONHSAT199836.1   | 1.392515 | 1.756537 | 13.45237 | 1.92E-05 | 0.029734 | 3.483978 |
| MSTRG.19670.1     | 1.722097 | 1.901365 | 13.36524 | 1.99E-05 | 0.030032 | 3.456982 |
| ENST00000577171.1 | 1.416777 | 6.218748 | 13.33739 | 2.01E-05 | 0.030032 | 3.448293 |
| NONHSAT164535.1   | 1.426866 | 1.797382 | 13.2929  | 2.04E-05 | 0.030032 | 3.434349 |
| lnc-BEGAIN-3:1    | 2.308653 | 2.171961 | 13.22185 | 2.10E-05 | 0.030032 | 3.41193  |
| NONHSAT170348.1   | 1.524814 | 5.580842 | 13.17459 | 2.15E-05 | 0.030032 | 3.396909 |
| NONHSAT158403.1   | 1.608475 | 7.804573 | 13.106   | 2.21E-05 | 0.030032 | 3.374957 |
| MSTRG.26960.1     | 1.521047 | 1.859795 | 13.09039 | 2.22E-05 | 0.030032 | 3.369935 |
| NONHSAT221322.1   | -2.03094 | 2.356043 | -13.0561 | 2.25E-05 | 0.030032 | 3.358878 |
| NONHSAT206540.1   | 2.517469 | 2.854961 | 13.05576 | 2.25E-05 | 0.030032 | 3.35876  |
| NR_028328         | -2.06206 | 7.218157 | -13.0291 | 2.28E-05 | 0.030032 | 3.35013  |
| NONHSAT171768.1   | 2.774117 | 2.41287  | 12.96225 | 2.34E-05 | 0.030032 | 3.328352 |
| lnc-STMN2-2:1     | 2.442787 | 2.382045 | 12.95201 | 2.35E-05 | 0.030032 | 3.325002 |
| lnc-EMB-10:1      | -2.27835 | 2.494412 | -12.9411 | 2.36E-05 | 0.030032 | 3.321427 |
| NONHSAT190586.1   | 2.308184 | 7.648295 | 12.93892 | 2.36E-05 | 0.030032 | 3.32071  |
| lnc-PCDH19-7:1    | 1.827667 | 2.052441 | 12.89216 | 2.41E-05 | 0.030032 | 3.305332 |
| lnc-SPTBN4-3:3    | 1.76667  | 1.907046 | 12.80083 | 2.51E-05 | 0.030032 | 3.27504  |
| ENST00000655097.1 | 1.911369 | 2.06301  | 12.78491 | 2.52E-05 | 0.030032 | 3.269725 |
| NR_004384         | -2.03591 | 12.93042 | -12.7079 | 2.61E-05 | 0.030032 | 3.24386  |
| NONHSAT210632.1   | 1.615607 | 1.894463 | 12.69485 | 2.62E-05 | 0.030032 | 3.239461 |
| NONHSAT207426.1   | 1.883442 | 2.040152 | 12.68937 | 2.63E-05 | 0.030032 | 3.237607 |
| lnc-FILIP1L-10:1  | -2.42335 | 2.728802 | -12.687  | 2.63E-05 | 0.030032 | 3.2368   |
| lnc-TRIM32-8:1    | 1.53137  | 1.814022 | 12.66003 | 2.66E-05 | 0.030032 | 3.227669 |
| ENST00000444629.5 | 1.806241 | 1.981245 | 12.62872 | 2.69E-05 | 0.030032 | 3.217023 |
| NONHSAT179896.1   | 1.625338 | 1.843193 | 12.58828 | 2.74E-05 | 0.030032 | 3.203214 |
| NONHSAT192231.1   | 1.783232 | 1.945052 | 12.58223 | 2.75E-05 | 0.030032 | 3.20114  |
| ENST00000453806.1 | -1.73951 | 4.981738 | -12.5822 | 2.75E-05 | 0.030032 | 3.201139 |
| MSTRG.37964.1     | 1.961934 | 5.003519 | 12.57875 | 2.75E-05 | 0.030032 | 3.19995  |
| MSTRG.22299.1     | 1.59627  | 6.51064  | 12.56439 | 2.77E-05 | 0.030032 | 3.195023 |
| NONHSAT161378.1   | -1.31707 | 6.620257 | -12.4996 | 2.85E-05 | 0.030345 | 3.172696 |

|                   |          |          |          |          |          |          |
|-------------------|----------|----------|----------|----------|----------|----------|
| lnc-CENPK-4:1     | -2.36988 | 2.399202 | -12.4355 | 2.93E-05 | 0.030345 | 3.150399 |
| ENST00000659906.1 | 1.643062 | 2.888929 | 12.40863 | 2.96E-05 | 0.030345 | 3.141024 |
| MSTRG.37919.1     | -1.72785 | 2.415477 | -12.3835 | 2.99E-05 | 0.030345 | 3.132233 |
| MSTRG.17580.1     | -1.60629 | 4.013538 | -12.3646 | 3.02E-05 | 0.030345 | 3.125559 |
| MSTRG.5986.15     | -1.95553 | 2.322986 | -12.3645 | 3.02E-05 | 0.030345 | 3.125535 |
| NR_024243         | -1.78246 | 14.97312 | -12.3561 | 3.03E-05 | 0.030345 | 3.122596 |
| lnc-CD38-12:3     | 1.608031 | 6.12143  | 12.34926 | 3.04E-05 | 0.030345 | 3.120167 |
| lnc-FGF18-4:2     | 1.916591 | 2.074234 | 12.3252  | 3.07E-05 | 0.030364 | 3.111673 |
| lnc-LY96-2:6      | 1.8704   | 1.999404 | 12.28208 | 3.13E-05 | 0.030536 | 3.096384 |
| MSTRG.50194.7     | 2.702237 | 2.557495 | 12.23519 | 3.19E-05 | 0.030536 | 3.079663 |
| NONHSAT208155.1   | 1.515851 | 1.806768 | 12.22473 | 3.21E-05 | 0.030536 | 3.075919 |
| ENST00000660183.1 | 1.293124 | 1.7076   | 12.22445 | 3.21E-05 | 0.030536 | 3.07582  |
| lnc-SLC15A4-25:1  | 2.054019 | 2.132461 | 12.19223 | 3.26E-05 | 0.03054  | 3.064258 |
| ENST00000645181.1 | 2.192491 | 2.168261 | 12.18164 | 3.27E-05 | 0.03054  | 3.060448 |
| NONHSAT218663.1   | -1.77481 | 2.893535 | -12.1285 | 3.35E-05 | 0.03082  | 3.041236 |
| ENST00000520543.1 | 2.599612 | 5.934996 | 12.10817 | 3.38E-05 | 0.03082  | 3.033878 |
| T103396           | 1.622455 | 2.091051 | 12.09908 | 3.39E-05 | 0.03082  | 3.030573 |
| lnc-CNDP1-5:1     | -1.98891 | 3.608239 | -12.0597 | 3.45E-05 | 0.030857 | 3.016212 |
| lnc-TAS2R1-13:1   | 2.017526 | 2.109815 | 12.05622 | 3.46E-05 | 0.030857 | 3.014943 |
| NONHSAT160698.1   | 1.566289 | 4.774624 | 12.01339 | 3.52E-05 | 0.030881 | 2.999237 |
| NONHSAT176819.1   | 1.295689 | 4.784806 | 11.99345 | 3.56E-05 | 0.030881 | 2.991897 |
| MSTRG.70356.1     | -2.21797 | 2.218894 | -11.9798 | 3.58E-05 | 0.030881 | 2.986877 |
| lnc-NEURL1B-3:7   | 2.42793  | 7.564297 | 11.97554 | 3.58E-05 | 0.030881 | 2.985291 |
| T357613           | 1.854258 | 2.26499  | 11.95389 | 3.62E-05 | 0.030881 | 2.977283 |
| lnc-ALKBH8-1:1    | 1.676366 | 3.459973 | 11.93881 | 3.64E-05 | 0.030881 | 2.971693 |
| MSTRG.12894.1     | -2.47695 | 2.571708 | -11.9009 | 3.71E-05 | 0.03115  | 2.957588 |
| lnc-TP53TG3F-17:1 | 2.914872 | 2.473404 | 11.88185 | 3.74E-05 | 0.031159 | 2.950479 |
| ENST00000614738.1 | -1.67273 | 3.828404 | -11.827  | 3.83E-05 | 0.031679 | 2.929922 |
| lnc-UBASH3A-8:4   | 2.128789 | 2.123338 | 11.80907 | 3.86E-05 | 0.031679 | 2.923151 |
| NONHSAT193259.1   | 1.959183 | 2.085765 | 11.7736  | 3.93E-05 | 0.03187  | 2.909745 |
| ENST00000416909.1 | -1.8832  | 2.238159 | -11.7567 | 3.96E-05 | 0.03187  | 2.903335 |
| lnc-CDH11-7:1     | 1.993597 | 7.199593 | 11.70839 | 4.05E-05 | 0.03187  | 2.884937 |
| NONHSAT173296.1   | 1.971497 | 4.451678 | 11.70553 | 4.05E-05 | 0.03187  | 2.883841 |
| NONHSAT186855.1   | 1.813458 | 3.526295 | 11.69763 | 4.07E-05 | 0.03187  | 2.880823 |
| ENST00000592429.1 | 1.41948  | 6.263818 | 11.6741  | 4.11E-05 | 0.03187  | 2.871809 |
| NONHSAT201540.1   | 1.845892 | 5.47181  | 11.65798 | 4.14E-05 | 0.03187  | 2.865616 |
| T113219           | 2.081205 | 3.903822 | 11.65018 | 4.16E-05 | 0.03187  | 2.862616 |
| NONHSAT197178.1   | 2.401851 | 2.298012 | 11.62606 | 4.20E-05 | 0.03187  | 2.853319 |
| NONHSAT163750.1   | 1.241502 | 1.746776 | 11.55921 | 4.33E-05 | 0.03187  | 2.82741  |
| NONHSAT217700.1   | 2.471741 | 6.15867  | 11.55836 | 4.34E-05 | 0.03187  | 2.827076 |
| MSTRG.25860.1     | 1.930347 | 6.645562 | 11.5216  | 4.41E-05 | 0.03187  | 2.812732 |
| lnc-MFSD8-9:1     | 2.608096 | 2.598704 | 11.50427 | 4.45E-05 | 0.03187  | 2.805945 |
| lnc-CREB1-5:1     | 1.503712 | 1.834215 | 11.5009  | 4.45E-05 | 0.03187  | 2.804624 |
| lnc-ANKDD1B-1:1   | -1.45461 | 2.106355 | -11.4739 | 4.51E-05 | 0.03187  | 2.794032 |
| NONHSAT163617.1   | -1.37336 | 8.373008 | -11.469  | 4.52E-05 | 0.03187  | 2.792093 |
| lnc-ZBBX-3:1      | 2.275267 | 2.173925 | 11.46642 | 4.52E-05 | 0.03187  | 2.791072 |
| NONHSAT212535.1   | 1.99983  | 2.061519 | 11.45021 | 4.56E-05 | 0.03187  | 2.784682 |
| NONHSAT153599.1   | 1.285866 | 1.676755 | 11.44825 | 4.56E-05 | 0.03187  | 2.783906 |

|                   |          |          |          |          |          |          |
|-------------------|----------|----------|----------|----------|----------|----------|
| NR_024244         | -1.84125 | 14.08783 | -11.4445 | 4.57E-05 | 0.03187  | 2.782419 |
| MSTRG.47169.1     | -1.67415 | 4.42932  | -11.422  | 4.62E-05 | 0.03187  | 2.773546 |
| NONHSAT221831.1   | 2.013748 | 2.881964 | 11.40359 | 4.66E-05 | 0.03187  | 2.766228 |
| MSTRG.30163.1     | 1.560716 | 4.64761  | 11.38046 | 4.71E-05 | 0.03187  | 2.757029 |
| NONHSAT196765.1   | -1.35952 | 1.847575 | -11.3769 | 4.72E-05 | 0.03187  | 2.755612 |
| lnc-CBR1-1:3      | 1.775462 | 2.125551 | 11.37619 | 4.72E-05 | 0.03187  | 2.755328 |
| lnc-NDUFB4-3:1    | -2.15503 | 2.259663 | -11.3574 | 4.76E-05 | 0.03187  | 2.747816 |
| lnc-DDX60-2:1     | -2.26439 | 2.291083 | -11.3565 | 4.76E-05 | 0.03187  | 2.747483 |
| MSTRG.11715.1     | -1.84451 | 2.20979  | -11.3525 | 4.77E-05 | 0.03187  | 2.745861 |
| MSTRG.56903.1     | -2.57518 | 2.500527 | -11.2969 | 4.90E-05 | 0.032073 | 2.723569 |
| ENST00000418282.2 | 2.745191 | 2.464881 | 11.29049 | 4.91E-05 | 0.032073 | 2.720993 |
| NR_024230         | -1.72068 | 15.41639 | -11.2863 | 4.92E-05 | 0.032073 | 2.719301 |
| NONHSAT181816.1   | -1.64966 | 4.046395 | -11.2837 | 4.93E-05 | 0.032073 | 2.718246 |
| T187569           | -1.65327 | 2.537995 | -11.2638 | 4.98E-05 | 0.032125 | 2.710214 |
| lnc-SERPINA12-2:1 | 1.191829 | 1.6652   | 11.25317 | 5.00E-05 | 0.032125 | 2.705923 |
| NR_024214         | -1.67369 | 15.63723 | -11.1997 | 5.13E-05 | 0.032717 | 2.684192 |
| ENST00000551372.1 | 1.449139 | 1.819269 | 11.17002 | 5.20E-05 | 0.032717 | 2.672089 |
| ENST00000669434.1 | 1.27369  | 8.523354 | 11.16423 | 5.22E-05 | 0.032717 | 2.669718 |
| lnc-EDAR-9:1      | 2.34901  | 2.230446 | 11.1621  | 5.22E-05 | 0.032717 | 2.668846 |
| NONHSAT222524.1   | 2.434382 | 2.282588 | 11.13194 | 5.30E-05 | 0.032988 | 2.656475 |
| lnc-COL8A1-3:2    | -1.47897 | 7.351048 | -11.0644 | 5.47E-05 | 0.033867 | 2.628602 |
| NONHSAT219358.1   | 2.005663 | 5.95481  | 10.99239 | 5.67E-05 | 0.034854 | 2.598588 |
| NONHSAT211005.1   | 1.242172 | 1.769483 | 10.95574 | 5.77E-05 | 0.035036 | 2.583211 |
| lnc-SIPA1L2-8:1   | 1.611674 | 4.146078 | 10.95466 | 5.77E-05 | 0.035036 | 2.582754 |
| ENST00000648601.1 | 1.879528 | 3.615328 | 10.93807 | 5.82E-05 | 0.035036 | 2.57577  |
| lnc-PRKCD-3:5     | -1.48326 | 3.044768 | -10.9322 | 5.84E-05 | 0.035036 | 2.57328  |
| MSTRG.48889.1     | -2.21465 | 2.306191 | -10.9179 | 5.88E-05 | 0.035072 | 2.567249 |
| T349820           | -1.69423 | 3.250475 | -10.873  | 6.01E-05 | 0.035107 | 2.548217 |
| ENST00000542076.1 | 1.410372 | 1.926554 | 10.87047 | 6.02E-05 | 0.035107 | 2.547153 |
| NONHSAT202201.1   | 1.724329 | 6.539039 | 10.86683 | 6.03E-05 | 0.035107 | 2.545605 |
| MSTRG.63591.1     | -1.2052  | 4.147708 | -10.8337 | 6.13E-05 | 0.035107 | 2.53149  |
| NONHSAT182196.1   | -1.98644 | 2.359883 | -10.8227 | 6.16E-05 | 0.035107 | 2.52678  |
| lnc-BAZ2B-1:7     | -1.36126 | 4.374617 | -10.8123 | 6.19E-05 | 0.035107 | 2.522327 |
| MSTRG.53837.1     | 2.138697 | 2.494222 | 10.80693 | 6.21E-05 | 0.035107 | 2.520024 |
| lnc-P2RY1-2:1     | 1.275788 | 2.506398 | 10.79532 | 6.24E-05 | 0.035107 | 2.515042 |
| ENST00000664488.1 | -1.49734 | 4.444411 | -10.772  | 6.31E-05 | 0.035107 | 2.505037 |
| T160707           | 3.571891 | 2.829317 | 10.77134 | 6.32E-05 | 0.035107 | 2.504733 |
| NONHSAT202194.1   | 1.659218 | 6.322596 | 10.77102 | 6.32E-05 | 0.035107 | 2.504593 |
| lnc-CD46-3:1      | 2.221579 | 2.238131 | 10.76582 | 6.33E-05 | 0.035107 | 2.502355 |
| NONHSAT173171.1   | 4.20993  | 4.614616 | 10.75079 | 6.38E-05 | 0.035107 | 2.495867 |
| T315546           | 1.470364 | 1.842186 | 10.72253 | 6.47E-05 | 0.035107 | 2.483644 |
| NONHSAT165196.1   | 1.601659 | 1.854466 | 10.69487 | 6.56E-05 | 0.035107 | 2.471632 |
| ENST00000519803.1 | -1.74887 | 2.170074 | -10.6917 | 6.57E-05 | 0.035107 | 2.470247 |
| lnc-HTR1B-1:5     | -1.30736 | 6.071777 | -10.6811 | 6.61E-05 | 0.035107 | 2.465656 |
| lnc-CCDC144NL-4:1 | 1.162458 | 11.89958 | 10.68081 | 6.61E-05 | 0.035107 | 2.465509 |
| lnc-EEF2-3:1      | 1.425262 | 1.727819 | 10.67749 | 6.62E-05 | 0.035107 | 2.464064 |
| lnc-SPATA6L-4:1   | 1.119662 | 2.414252 | 10.66336 | 6.67E-05 | 0.035107 | 2.457896 |
| MSTRG.67348.1     | 1.525061 | 8.478411 | 10.66118 | 6.67E-05 | 0.035107 | 2.456944 |

|                   |          |          |          |          |          |          |
|-------------------|----------|----------|----------|----------|----------|----------|
| T262691           | -1.89555 | 2.22917  | -10.651  | 6.71E-05 | 0.035107 | 2.452513 |
| NONHSAT221960.1   | 1.321745 | 3.63003  | 10.62619 | 6.79E-05 | 0.035107 | 2.441622 |
| lnc-CTNNA1-4:2    | 1.961328 | 6.941802 | 10.62268 | 6.80E-05 | 0.035107 | 2.44008  |
| MSTRG.19441.1     | -1.41867 | 3.341912 | -10.6025 | 6.87E-05 | 0.035107 | 2.43119  |
| NONHSAT155120.1   | 2.043752 | 6.39348  | 10.60156 | 6.87E-05 | 0.035107 | 2.430791 |
| NONHSAT199491.1   | 1.900883 | 2.356964 | 10.59773 | 6.89E-05 | 0.035107 | 2.429105 |
| lnc-HIST1H2AH-5:1 | -1.62818 | 8.153641 | -10.5977 | 6.89E-05 | 0.035107 | 2.429096 |
| NONHSAT173365.1   | 1.556803 | 3.319931 | 10.59525 | 6.90E-05 | 0.035107 | 2.428013 |
| MSTRG.58292.5     | 1.617663 | 1.828125 | 10.57899 | 6.95E-05 | 0.035107 | 2.420838 |
| lnc-CNDP1-6:1     | -1.2989  | 4.490371 | -10.5759 | 6.96E-05 | 0.035107 | 2.41949  |
| MSTRG.12643.4     | -1.193   | 2.158738 | -10.5603 | 7.02E-05 | 0.035208 | 2.412563 |
| NONHSAT211083.1   | 1.894737 | 5.692833 | 10.54555 | 7.07E-05 | 0.035295 | 2.406041 |
| NONHSAT172031.1   | 1.271532 | 5.325505 | 10.53167 | 7.12E-05 | 0.035368 | 2.399876 |
| lnc-LSMEM1-2:1    | 2.944719 | 2.649474 | 10.5129  | 7.19E-05 | 0.03553  | 2.391526 |
| NONHSAT198051.1   | 1.664121 | 1.936057 | 10.4979  | 7.24E-05 | 0.035626 | 2.384835 |
| ENST00000609827.1 | -1.8649  | 2.2096   | -10.4749 | 7.33E-05 | 0.035771 | 2.374576 |
| lnc-OR10K1-1:1    | -1.37628 | 4.732928 | -10.4627 | 7.37E-05 | 0.035771 | 2.369067 |
| MSTRG.23637.1     | 1.831857 | 1.97281  | 10.46122 | 7.38E-05 | 0.035771 | 2.368426 |
| NONHSAT158418.1   | 1.933411 | 2.166774 | 10.4441  | 7.44E-05 | 0.035866 | 2.360738 |
| NONHSAT149668.1   | 1.708242 | 3.986556 | 10.42128 | 7.53E-05 | 0.035866 | 2.350463 |
| lnc-MARCH4-2:10   | -1.10867 | 5.806953 | -10.4117 | 7.57E-05 | 0.035866 | 2.346155 |
| NR_024342         | -1.64693 | 14.21585 | -10.3964 | 7.63E-05 | 0.035866 | 2.339216 |
| MSTRG.8708.2      | 1.347104 | 9.196872 | 10.36755 | 7.74E-05 | 0.035866 | 2.326153 |
| NR_002976         | -1.46987 | 8.191472 | -10.3571 | 7.78E-05 | 0.035866 | 2.321426 |
| lnc-SOHLH2-3:1    | -1.22982 | 8.309375 | -10.3536 | 7.80E-05 | 0.035866 | 2.319793 |
| NONHSAT183290.1   | 1.567611 | 5.428803 | 10.3458  | 7.83E-05 | 0.035866 | 2.316263 |
| lnc-WRNIP1-34:2   | 1.108825 | 1.622461 | 10.31419 | 7.95E-05 | 0.035866 | 2.301838 |
| NONHSAT149439.1   | -1.0557  | 5.92883  | -10.3138 | 7.96E-05 | 0.035866 | 2.301639 |
| NONHSAT206047.1   | -1.72676 | 3.298869 | -10.313  | 7.96E-05 | 0.035866 | 2.301307 |
| lnc-FRMD4A-6:1    | -1.32452 | 11.27414 | -10.3117 | 7.96E-05 | 0.035866 | 2.300719 |
| MSTRG.34252.1     | 1.648324 | 1.888431 | 10.30276 | 8.00E-05 | 0.035866 | 2.296608 |
| lnc-CDY2A-11:1    | 1.634703 | 5.527621 | 10.29692 | 8.03E-05 | 0.035866 | 2.293935 |
| lnc-VRK2-14:1     | 1.646123 | 1.891569 | 10.29514 | 8.03E-05 | 0.035866 | 2.293119 |
| MSTRG.24373.1     | -1.26619 | 4.844265 | -10.272  | 8.13E-05 | 0.035866 | 2.282506 |
| lnc-NT5E-3:1      | -1.73212 | 4.194145 | -10.2718 | 8.13E-05 | 0.035866 | 2.282392 |
| MSTRG.70999.1     | -1.31851 | 6.785662 | -10.2528 | 8.21E-05 | 0.035866 | 2.273651 |
| ENST00000445418.1 | 1.867445 | 4.444669 | 10.23329 | 8.29E-05 | 0.035866 | 2.264648 |
| lnc-TDRD1-1:1     | -1.14586 | 9.175468 | -10.2216 | 8.34E-05 | 0.035866 | 2.259244 |
| lnc-RXFP3-2:1     | -1.26424 | 7.597213 | -10.2212 | 8.35E-05 | 0.035866 | 2.259062 |
| ENST00000618303.1 | 2.201269 | 2.210011 | 10.21697 | 8.36E-05 | 0.035866 | 2.2571   |
| NONHSAT218581.1   | 1.333163 | 4.178059 | 10.21673 | 8.37E-05 | 0.035866 | 2.256984 |
| NONHSAT154087.1   | 1.738151 | 2.376426 | 10.21482 | 8.37E-05 | 0.035866 | 2.2561   |
| NONHSAT223976.1   | 1.485573 | 4.127132 | 10.21178 | 8.39E-05 | 0.035866 | 2.254693 |
| lnc-CRACR2A-8:1   | 1.158921 | 6.209449 | 10.21161 | 8.39E-05 | 0.035866 | 2.254614 |
| NONHSAT206058.1   | 1.283887 | 1.713389 | 10.18436 | 8.51E-05 | 0.035866 | 2.241962 |
| MSTRG.14267.1     | 1.908893 | 7.946334 | 10.1822  | 8.52E-05 | 0.035866 | 2.240957 |
| NONHSAT220127.1   | 1.097996 | 6.435377 | 10.17937 | 8.53E-05 | 0.035866 | 2.239638 |
| ENST00000428191.1 | 1.799919 | 4.310902 | 10.16353 | 8.60E-05 | 0.035866 | 2.232258 |

|                   |          |          |          |          |          |          |
|-------------------|----------|----------|----------|----------|----------|----------|
| lnc-OR8G5-5:1     | 2.059076 | 2.099282 | 10.15966 | 8.62E-05 | 0.035866 | 2.230453 |
| lnc-E2F6-1:1      | -1.90292 | 3.603758 | -10.1539 | 8.64E-05 | 0.035866 | 2.227762 |
| ENST00000637583.1 | 1.971367 | 3.566366 | 10.15258 | 8.65E-05 | 0.035866 | 2.227145 |
| NONHSAT198001.1   | 2.408993 | 5.055687 | 10.1471  | 8.67E-05 | 0.035866 | 2.224584 |
| MSTRG.18011.9     | -1.11778 | 7.596469 | -10.143  | 8.69E-05 | 0.035866 | 2.222686 |
| NONHSAT174850.1   | -1.43504 | 3.224837 | -10.1401 | 8.71E-05 | 0.035866 | 2.2213   |
| lnc-AGBL1-5:1     | 1.32797  | 5.892156 | 10.08965 | 8.94E-05 | 0.035866 | 2.197625 |
| lnc-MTRF1-1:1     | 1.574575 | 8.03103  | 10.08369 | 8.97E-05 | 0.035866 | 2.194816 |
| lnc-TSR2-1:1      | 1.652311 | 2.989515 | 10.07671 | 9.00E-05 | 0.035866 | 2.191523 |
| lnc-VWF-2:8       | -1.29591 | 5.084476 | -10.0611 | 9.07E-05 | 0.035866 | 2.184133 |
| T187106           | -1.70002 | 3.340289 | -10.058  | 9.09E-05 | 0.035866 | 2.182662 |
| NONHSAT185724.1   | 1.699086 | 2.048545 | 10.04393 | 9.16E-05 | 0.035866 | 2.176021 |
| MSTRG.2665.1      | -1.68618 | 2.581504 | -10.0292 | 9.23E-05 | 0.035866 | 2.169043 |
| lnc-CCDC82-9:1    | 1.475958 | 1.829763 | 10.02256 | 9.26E-05 | 0.035866 | 2.165882 |
| MSTRG.5852.1      | 1.555522 | 2.192297 | 10.00513 | 9.35E-05 | 0.035866 | 2.157585 |
| lnc-PIK3R1-10:1   | 2.011294 | 3.826484 | 10.00161 | 9.36E-05 | 0.035866 | 2.155908 |
| NONHSAT155125.1   | 1.506764 | 1.833986 | 9.992463 | 9.41E-05 | 0.035866 | 2.151546 |
| ENST00000449805.2 | 1.282768 | 6.004819 | 9.985274 | 9.45E-05 | 0.035866 | 2.148114 |
| MSTRG.15081.1     | -1.41791 | 5.847756 | -9.97392 | 9.50E-05 | 0.035866 | 2.142688 |
| lnc-FZD2-3:1      | -1.57346 | 2.94601  | -9.97217 | 9.51E-05 | 0.035866 | 2.141849 |
| NONHSAT191702.1   | 1.626765 | 2.039775 | 9.969486 | 9.52E-05 | 0.035866 | 2.140565 |
| NONHSAT161126.1   | 1.844564 | 2.146205 | 9.968049 | 9.53E-05 | 0.035866 | 2.139877 |
| NONHSAT216808.1   | 1.438863 | 4.981948 | 9.967471 | 9.53E-05 | 0.035866 | 2.139601 |
| NR_027112         | 1.420047 | 1.816234 | 9.932356 | 9.71E-05 | 0.035866 | 2.122748 |
| lnc-ACRTR1-3:1    | -1.44994 | 3.683432 | -9.93201 | 9.72E-05 | 0.035866 | 2.122582 |
| lnc-STX2-12:1     | 1.366709 | 5.420311 | 9.929257 | 9.73E-05 | 0.035866 | 2.121257 |
| lnc-PGAP1-4:1     | 1.268468 | 5.276692 | 9.921472 | 9.77E-05 | 0.035866 | 2.117508 |
| NONHSAT197807.1   | 2.210308 | 2.123853 | 9.921053 | 9.77E-05 | 0.035866 | 2.117307 |
| MSTRG.27714.1     | -1.389   | 4.094142 | -9.91923 | 9.78E-05 | 0.035866 | 2.116429 |
| lnc-FLRT2-10:2    | -1.35548 | 2.130883 | -9.91871 | 9.79E-05 | 0.035866 | 2.116178 |
| NONHSAT185643.1   | 1.921854 | 2.191864 | 9.914484 | 9.81E-05 | 0.035866 | 2.114141 |
| lnc-WASHC5-11:3   | 2.127146 | 2.473796 | 9.91371  | 9.81E-05 | 0.035866 | 2.113767 |
| lnc-TSPY10-8:1    | 1.571883 | 3.834357 | 9.912116 | 9.82E-05 | 0.035866 | 2.112998 |
| lnc-RABL3-5:1     | -1.00549 | 9.664778 | -9.91056 | 9.83E-05 | 0.035866 | 2.112247 |
| lnc-MVD-3:3       | 1.070911 | 7.718214 | 9.907218 | 9.85E-05 | 0.035866 | 2.110635 |
| lnc-FAM184A-2:1   | -2.35522 | 2.509924 | -9.90103 | 9.88E-05 | 0.035866 | 2.107648 |
| NONHSAT161348.1   | -1.65988 | 2.021154 | -9.89513 | 9.91E-05 | 0.035866 | 2.104798 |
| ENST00000607893.1 | 1.128931 | 11.12537 | 9.888704 | 9.94E-05 | 0.035866 | 2.101688 |
| LINC01539:9       | 1.042939 | 6.205708 | 9.885366 | 9.96E-05 | 0.035866 | 2.100073 |
| lnc-RDX-9:1       | -1.03119 | 4.839398 | -9.88514 | 9.96E-05 | 0.035866 | 2.099965 |
| NONHSAT186640.1   | 2.046146 | 2.131077 | 9.883873 | 9.97E-05 | 0.035866 | 2.09935  |
| ENST00000514339.1 | 1.357888 | 3.588621 | 9.878725 | 1.00E-04 | 0.035866 | 2.096856 |
| MSTRG.23214.5     | 2.280648 | 2.622794 | 9.875934 | 0.0001   | 0.035866 | 2.095504 |
| MSTRG.17975.21    | 2.528747 | 3.537119 | 9.872297 | 0.0001   | 0.035866 | 2.093741 |
| NONHSAT202972.1   | -1.65952 | 2.308633 | -9.85568 | 0.000101 | 0.036059 | 2.085674 |
| lnc-QRSL1-4:1     | -1.63875 | 2.98064  | -9.84278 | 0.000102 | 0.036135 | 2.079399 |
| lnc-RWDD1-1:1     | -1.1438  | 5.612629 | -9.83863 | 0.000102 | 0.036135 | 2.07738  |
| NONHSAT177397.1   | 1.779613 | 5.09756  | 9.818688 | 0.000103 | 0.036169 | 2.067651 |

|                   |          |          |          |          |          |          |
|-------------------|----------|----------|----------|----------|----------|----------|
| NONHSAT173967.1   | 1.208807 | 1.707904 | 9.816154 | 0.000103 | 0.036169 | 2.066413 |
| NONHSAT192665.1   | 1.737923 | 6.480583 | 9.813714 | 0.000104 | 0.036169 | 2.065221 |
| ENST00000558967.1 | 1.243376 | 6.071809 | 9.810962 | 0.000104 | 0.036169 | 2.063875 |
| ENST00000655217.1 | 1.501969 | 2.301255 | 9.780849 | 0.000105 | 0.036634 | 2.049123 |
| lnc-TBC1D32-1:1   | 1.715763 | 1.956474 | 9.762999 | 0.000106 | 0.036862 | 2.04035  |
| NONHSAT153806.1   | 2.019114 | 2.087397 | 9.729109 | 0.000108 | 0.037366 | 2.023635 |
| lnc-CYTH4-2:1     | 2.165053 | 2.502853 | 9.725322 | 0.000109 | 0.037366 | 2.021762 |
| NONHSAT149238.1   | 1.088966 | 1.712454 | 9.718764 | 0.000109 | 0.037371 | 2.018517 |
| lnc-ZNF366-9:1    | -1.3957  | 5.017043 | -9.70953 | 0.00011  | 0.037432 | 2.013946 |
| lnc-NUTM1-1:2     | 1.900288 | 3.574473 | 9.691948 | 0.000111 | 0.037577 | 2.005219 |
| lnc-PTPN14-8:1    | -1.59755 | 2.481014 | -9.6829  | 0.000111 | 0.037577 | 2.000719 |
| MSTRG.51008.21    | 2.411834 | 2.394019 | 9.678017 | 0.000111 | 0.037577 | 1.998291 |
| NONHSAT183428.1   | 1.275943 | 1.742699 | 9.676931 | 0.000111 | 0.037577 | 1.997751 |
| NONHSAT150719.1   | -1.17071 | 3.974673 | -9.66562 | 0.000112 | 0.037577 | 1.992117 |
| NONHSAT164400.1   | 1.680123 | 5.13397  | 9.66546  | 0.000112 | 0.037577 | 1.992036 |
| ENST00000426859.1 | 1.106587 | 7.136497 | 9.659404 | 0.000113 | 0.037577 | 1.989015 |
| NONHSAT175159.1   | 1.663346 | 2.095434 | 9.638201 | 0.000114 | 0.037772 | 1.97842  |
| NONHSAT205181.1   | 1.490717 | 1.823894 | 9.623251 | 0.000115 | 0.037772 | 1.970931 |
| NR_002324         | -1.50006 | 10.2388  | -9.59914 | 0.000116 | 0.037772 | 1.958823 |
| NONHSAT181150.1   | 1.348715 | 2.840471 | 9.581593 | 0.000117 | 0.037772 | 1.949983 |
| ENST00000534076.2 | 1.848036 | 2.040517 | 9.580002 | 0.000118 | 0.037772 | 1.949181 |
| ENST00000457033.5 | -1.28161 | 12.75784 | -9.57717 | 0.000118 | 0.037772 | 1.947754 |
| lnc-KIAA0825-2:1  | -1.09331 | 5.173582 | -9.57646 | 0.000118 | 0.037772 | 1.947396 |
| NONHSAT153597.1   | 1.734349 | 2.024337 | 9.574867 | 0.000118 | 0.037772 | 1.94659  |
| lnc-MRPL39-31:1   | -1.04675 | 2.711256 | -9.56974 | 0.000118 | 0.037772 | 1.944001 |
| ENST00000656703.1 | -1.67577 | 2.447012 | -9.56881 | 0.000118 | 0.037772 | 1.94353  |
| lnc-MAL2-1:1      | 1.572168 | 3.185994 | 9.565892 | 0.000118 | 0.037772 | 1.942057 |
| lnc-TMEM135-9:1   | 2.172456 | 2.201066 | 9.565518 | 0.000118 | 0.037772 | 1.941869 |
| ENST00000640491.1 | 1.478222 | 7.496851 | 9.56523  | 0.000119 | 0.037772 | 1.941723 |
| ENST00000417299.2 | -1.17361 | 4.725215 | -9.56241 | 0.000119 | 0.037772 | 1.940298 |
| MSTRG.32762.2     | 1.548526 | 5.941202 | 9.561594 | 0.000119 | 0.037772 | 1.939885 |
| T058954           | 1.325085 | 5.828587 | 9.530867 | 0.000121 | 0.037814 | 1.924316 |
| lnc-FZD7-1:1      | 1.683365 | 4.743766 | 9.521817 | 0.000121 | 0.037814 | 1.919718 |
| ENST00000414418.1 | 1.388173 | 5.818618 | 9.521303 | 0.000121 | 0.037814 | 1.919457 |
| MSTRG.58741.1     | 1.754759 | 1.937986 | 9.519493 | 0.000122 | 0.037814 | 1.918536 |
| lnc-MED12L-3:1    | 1.180772 | 4.260134 | 9.497471 | 0.000123 | 0.037814 | 1.907321 |
| NONHSAT153975.1   | 1.521082 | 1.848157 | 9.496555 | 0.000123 | 0.037814 | 1.906854 |
| NONHSAT219425.1   | 1.613632 | 2.067654 | 9.487788 | 0.000124 | 0.037814 | 1.902379 |
| ENST00000422510.1 | -2.09589 | 2.352787 | -9.48679 | 0.000124 | 0.037814 | 1.901869 |
| MSTRG.51667.1     | 1.463796 | 1.773546 | 9.484247 | 0.000124 | 0.037814 | 1.90057  |
| ENST00000670759.1 | -1.43395 | 2.095138 | -9.48057 | 0.000124 | 0.037814 | 1.898689 |
| lnc-RHEX-1:5      | 1.190096 | 4.281831 | 9.480419 | 0.000124 | 0.037814 | 1.898614 |
| NONHSAT205570.1   | 1.092561 | 4.231719 | 9.476213 | 0.000124 | 0.037814 | 1.896463 |
| MSTRG.5495.2      | 1.339729 | 3.61807  | 9.473413 | 0.000125 | 0.037814 | 1.895031 |
| lnc-SMARCA4-4:1   | 1.005047 | 11.70612 | 9.473006 | 0.000125 | 0.037814 | 1.894822 |
| NONHSAT199557.1   | 1.395526 | 5.836465 | 9.470588 | 0.000125 | 0.037814 | 1.893584 |
| lnc-MX1-5:1       | -1.06842 | 6.084558 | -9.47058 | 0.000125 | 0.037814 | 1.893579 |
| NONHSAT216263.1   | -2.04437 | 2.190355 | -9.46444 | 0.000125 | 0.03783  | 1.890438 |

|                   |          |          |          |          |          |          |
|-------------------|----------|----------|----------|----------|----------|----------|
| lnc-CCDC18-2:1    | -2.01373 | 3.283779 | -9.44862 | 0.000126 | 0.038037 | 1.88232  |
| T339380           | -1.5981  | 2.647264 | -9.44124 | 0.000127 | 0.038037 | 1.878532 |
| T320443           | 1.665411 | 5.869047 | 9.430251 | 0.000128 | 0.038037 | 1.872879 |
| MSTRG.33672.1     | -1.49043 | 2.147304 | -9.429   | 0.000128 | 0.038037 | 1.872236 |
| lnc-MPDZ-4:1      | -1.34849 | 5.880457 | -9.42414 | 0.000128 | 0.038037 | 1.869734 |
| NONHSAT174964.1   | 1.441809 | 5.839663 | 9.413712 | 0.000129 | 0.038037 | 1.864357 |
| MSTRG.26947.1     | 2.182912 | 2.166538 | 9.409605 | 0.000129 | 0.038037 | 1.862237 |
| MSTRG.21348.20    | -2.22182 | 2.203268 | -9.40931 | 0.000129 | 0.038037 | 1.862087 |
| LINC01010:9       | -1.64981 | 2.257336 | -9.40063 | 0.00013  | 0.038037 | 1.857602 |
| NR_033423         | -1.45739 | 3.796688 | -9.39286 | 0.00013  | 0.038037 | 1.853585 |
| NONHSAT206852.1   | 2.850725 | 2.562076 | 9.389237 | 0.000131 | 0.038037 | 1.85171  |
| NONHSAT150153.1   | 2.840038 | 2.513147 | 9.382942 | 0.000131 | 0.038037 | 1.84845  |
| NR_002966         | -1.88142 | 7.802454 | -9.38112 | 0.000131 | 0.038037 | 1.847508 |
| lnc-NUP107-1:1    | -1.13051 | 6.617373 | -9.37048 | 0.000132 | 0.038131 | 1.841986 |
| NONHSAT189667.1   | 1.423678 | 4.336148 | 9.366523 | 0.000132 | 0.038131 | 1.839934 |
| NONHSAT219215.1   | 1.395782 | 1.872188 | 9.340064 | 0.000134 | 0.038265 | 1.826172 |
| NONHSAT170302.1   | 1.371489 | 1.708263 | 9.335168 | 0.000135 | 0.038265 | 1.82362  |
| ENST00000647189.1 | 1.356897 | 4.105439 | 9.334946 | 0.000135 | 0.038265 | 1.823505 |
| lnc-ARHGAP27-1:5  | -1.5083  | 2.526578 | -9.32863 | 0.000135 | 0.038265 | 1.820208 |
| lnc-METTL15-11:1  | -1.89812 | 3.63122  | -9.32663 | 0.000135 | 0.038265 | 1.819167 |
| NONHSAT196509.1   | -1.75608 | 3.162196 | -9.32145 | 0.000136 | 0.038265 | 1.816462 |
| lnc-TRMU-3:1      | -1.61312 | 5.006592 | -9.31589 | 0.000136 | 0.038265 | 1.813553 |
| NONHSAT182911.1   | 1.551545 | 3.784772 | 9.305213 | 0.000137 | 0.038265 | 1.807969 |
| NONHSAT201980.1   | -1.61751 | 4.717644 | -9.29441 | 0.000138 | 0.038265 | 1.802309 |
| lnc-HELQ-1:1      | -1.49415 | 3.903194 | -9.28039 | 0.000139 | 0.038265 | 1.794951 |
| ENST00000544067.1 | 1.426078 | 4.067434 | 9.280337 | 0.000139 | 0.038265 | 1.794922 |
| lnc-ITGA1-2:2     | 1.676656 | 2.002082 | 9.279086 | 0.000139 | 0.038265 | 1.794265 |
| NONHSAT200324.1   | 1.232132 | 7.017636 | 9.277584 | 0.000139 | 0.038265 | 1.793476 |
| MSTRG.22526.3     | -1.48084 | 1.967171 | -9.27215 | 0.00014  | 0.038265 | 1.790619 |
| NONHSAT196550.1   | -1.18495 | 6.930575 | -9.27109 | 0.00014  | 0.038265 | 1.790062 |
| lnc-ARL14EPL-3:1  | -1.40152 | 4.167072 | -9.26613 | 0.00014  | 0.038265 | 1.787453 |
| lnc-EDC3-2:7      | 1.944086 | 2.022639 | 9.261939 | 0.00014  | 0.038265 | 1.785245 |
| lnc-CXorf66-4:1   | -1.39211 | 4.137513 | -9.25893 | 0.000141 | 0.038265 | 1.783658 |
| lnc-RRP1-3:1      | -1.39139 | 4.492068 | -9.25704 | 0.000141 | 0.038265 | 1.782663 |
| MSTRG.31549.1     | 1.944997 | 2.001539 | 9.249252 | 0.000141 | 0.038331 | 1.778558 |
| ENST00000558940.1 | 1.817011 | 3.751884 | 9.242591 | 0.000142 | 0.038373 | 1.775042 |
| lnc-TRAFD1-2:1    | -1.04761 | 7.454051 | -9.22587 | 0.000143 | 0.038636 | 1.766202 |
| NONHSAT183359.1   | 2.199822 | 2.65157  | 9.214614 | 0.000144 | 0.0387   | 1.76024  |
| NONHSAT202039.1   | 1.961885 | 2.231906 | 9.213636 | 0.000144 | 0.0387   | 1.759722 |
| NONHSAT218990.1   | 1.644381 | 4.162767 | 9.191802 | 0.000146 | 0.039081 | 1.748128 |
| T319903           | -1.18486 | 7.351671 | -9.17092 | 0.000148 | 0.039158 | 1.737011 |
| lnc-ARL5C-1:1     | 1.287213 | 7.070081 | 9.170477 | 0.000148 | 0.039158 | 1.736773 |
| NONHSAT157107.1   | -1.13169 | 4.54964  | -9.16257 | 0.000149 | 0.039158 | 1.732553 |
| lnc-RPS6KA6-1:1   | -1.13937 | 7.258334 | -9.16115 | 0.000149 | 0.039158 | 1.731796 |
| NONHSAT201031.1   | -1.0336  | 1.586268 | -9.16071 | 0.000149 | 0.039158 | 1.731558 |
| MSTRG.63783.1     | -1.64486 | 3.052948 | -9.14998 | 0.00015  | 0.039209 | 1.725824 |
| ENST00000507932.1 | 1.300679 | 7.873176 | 9.137301 | 0.000151 | 0.039209 | 1.719039 |
| NONHSAT196558.1   | -2.19713 | 3.374286 | -9.13692 | 0.000151 | 0.039209 | 1.718836 |



|                   |          |          |          |          |          |          |
|-------------------|----------|----------|----------|----------|----------|----------|
| NR_002921         | -1.4956  | 6.537812 | -9.12967 | 0.000151 | 0.039209 | 1.714948 |
| CERS3-AS1:5       | -1.37579 | 1.740811 | -9.12826 | 0.000152 | 0.039209 | 1.714194 |
| NONHSAT181214.1   | 1.380926 | 4.462099 | 9.128006 | 0.000152 | 0.039209 | 1.714056 |
| NONHSAT224442.1   | 1.711657 | 2.022126 | 9.115179 | 0.000153 | 0.039209 | 1.70717  |
| lnc-UNC5CL-4:1    | -1.00575 | 1.606089 | -9.10461 | 0.000154 | 0.039209 | 1.701486 |
| ENST00000433406.6 | -1.29396 | 6.545807 | -9.09688 | 0.000154 | 0.039209 | 1.697325 |
| MSTRG.25532.3     | -1.60232 | 2.564293 | -9.0967  | 0.000154 | 0.039209 | 1.697224 |
| T095343           | 1.430262 | 1.887215 | 9.092132 | 0.000155 | 0.039209 | 1.694765 |
| lnc-PATE4-3:1     | -1.91626 | 3.120959 | -9.08439 | 0.000155 | 0.039209 | 1.690589 |
| NR_109893         | 2.52893  | 2.330006 | 9.078693 | 0.000156 | 0.039209 | 1.687514 |
| ENST00000607675.1 | 1.397969 | 1.883686 | 9.075302 | 0.000156 | 0.039209 | 1.685682 |
| lnc-CPT2-4:2      | 1.090577 | 3.880197 | 9.070125 | 0.000157 | 0.039209 | 1.682883 |
| lnc-HUS1B-3:2     | -1.0378  | 8.93736  | -9.0633  | 0.000157 | 0.039209 | 1.679193 |
| LINC02387:5       | -1.69425 | 3.063042 | -9.05305 | 0.000158 | 0.039209 | 1.673639 |
| NONHSAT193062.1   | -1.11557 | 6.836788 | -9.05279 | 0.000158 | 0.039209 | 1.673497 |
| NONHSAT206636.1   | 1.032153 | 5.100432 | 9.048039 | 0.000159 | 0.039209 | 1.670923 |
| NR_027046         | -1.12021 | 6.053628 | -9.03828 | 0.00016  | 0.039209 | 1.665628 |
| NONHSAT171612.1   | 1.216854 | 4.18652  | 9.036256 | 0.00016  | 0.039209 | 1.664527 |
| lnc-CCDC68-2:1    | -1.07854 | 8.491209 | -9.03412 | 0.00016  | 0.039209 | 1.663369 |
| NONHSAT193770.1   | 1.15899  | 6.143934 | 9.03179  | 0.00016  | 0.039209 | 1.662101 |
| MSTRG.34673.1     | -1.92332 | 5.990653 | -9.03004 | 0.00016  | 0.039209 | 1.661151 |
| MSTRG.56604.1     | 2.585331 | 2.393693 | 9.023618 | 0.000161 | 0.039209 | 1.657656 |
| lnc-CNOT1-2:1     | -2.20416 | 2.529973 | -9.02233 | 0.000161 | 0.039209 | 1.656956 |
| ENST00000253848.3 | -1.45165 | 1.903425 | -9.02075 | 0.000161 | 0.039209 | 1.656095 |
| ENST00000612725.1 | -1.48011 | 3.232559 | -9.01931 | 0.000161 | 0.039209 | 1.655312 |
| lnc-RNLS-3:1      | 1.487535 | 1.856407 | 9.012438 | 0.000162 | 0.039271 | 1.651568 |
| ENST00000669110.1 | 2.574213 | 2.400218 | 9.004863 | 0.000163 | 0.039292 | 1.647437 |
| NONHSAT170266.1   | 1.258418 | 1.683942 | 9.003287 | 0.000163 | 0.039292 | 1.646577 |
| ENST00000624919.1 | -1.28426 | 3.674949 | -8.98802 | 0.000164 | 0.039327 | 1.638238 |
| T306349           | 1.68165  | 6.467399 | 8.973151 | 0.000166 | 0.039327 | 1.630097 |
| lnc-PRDM14-4:1    | -2.36354 | 2.451186 | -8.95606 | 0.000167 | 0.039327 | 1.620722 |
| NONHSAT169160.1   | 1.878291 | 3.707548 | 8.951532 | 0.000168 | 0.039327 | 1.618232 |
| MSTRG.30364.1     | 1.861755 | 1.976856 | 8.951209 | 0.000168 | 0.039327 | 1.618054 |
| ENST00000590604.1 | 1.325285 | 4.40086  | 8.950678 | 0.000168 | 0.039327 | 1.617763 |
| MSTRG.22925.2     | 1.325348 | 4.231236 | 8.942916 | 0.000169 | 0.039327 | 1.613494 |
| ENST00000612584.1 | 2.029361 | 2.118511 | 8.942114 | 0.000169 | 0.039327 | 1.613052 |
| NONHSAT207851.1   | 2.071397 | 2.091368 | 8.941184 | 0.000169 | 0.039327 | 1.61254  |
| NONHSAT187784.1   | 1.303881 | 4.492906 | 8.937147 | 0.000169 | 0.039327 | 1.610317 |
| NONHSAT200630.1   | 1.02281  | 4.377473 | 8.935894 | 0.000169 | 0.039327 | 1.609628 |
| NONHSAT186218.1   | 1.10391  | 1.592973 | 8.92802  | 0.00017  | 0.039327 | 1.605288 |
| NONHSAT200308.1   | -1.91478 | 3.538937 | -8.92699 | 0.00017  | 0.039327 | 1.604721 |
| ENST00000445785.6 | -1.37295 | 1.943864 | -8.92542 | 0.00017  | 0.039327 | 1.603853 |
| NONHSAT176220.1   | -1.32108 | 4.948961 | -8.92516 | 0.00017  | 0.039327 | 1.60371  |
| T269433           | 1.460152 | 1.764098 | 8.913614 | 0.000172 | 0.039327 | 1.597336 |
| NONHSAT161191.1   | 2.532525 | 2.646512 | 8.908743 | 0.000172 | 0.039327 | 1.594644 |
| lnc-TMEM17-1:1    | 1.459854 | 6.073343 | 8.907114 | 0.000172 | 0.039327 | 1.593743 |
| MSTRG.35826.1     | 1.139259 | 1.864557 | 8.906205 | 0.000172 | 0.039327 | 1.593241 |
| ENST00000510211.1 | 2.017119 | 2.105238 | 8.897438 | 0.000173 | 0.039441 | 1.588389 |

|                   |          |          |          |          |          |          |
|-------------------|----------|----------|----------|----------|----------|----------|
| NONHSAT178728.1   | -1.25641 | 1.741882 | -8.88907 | 0.000174 | 0.039468 | 1.583753 |
| NONHSAT152008.1   | 2.002671 | 3.300857 | 8.888616 | 0.000174 | 0.039468 | 1.583501 |
| NONHSAT224511.1   | 1.712896 | 4.626826 | 8.868713 | 0.000176 | 0.039768 | 1.57245  |
| NONHSAT203440.1   | 1.373046 | 4.63511  | 8.864348 | 0.000177 | 0.039768 | 1.570023 |
| lnc-KIAA0408-4:2  | -1.40062 | 3.598488 | -8.85698 | 0.000177 | 0.039852 | 1.565924 |
| ENST00000653118.1 | 1.395792 | 5.709966 | 8.84737  | 0.000178 | 0.039933 | 1.560567 |
| NONHSAT209334.1   | -1.72972 | 4.257581 | -8.84604 | 0.000179 | 0.039933 | 1.559824 |
| ENST00000520572.2 | -1.2193  | 3.14639  | -8.83028 | 0.00018  | 0.040128 | 1.551024 |
| lnc-JUN-5:16      | -1.96483 | 2.769819 | -8.8012  | 0.000183 | 0.040664 | 1.534737 |
| NONHSAT165393.1   | -1.0295  | 5.775125 | -8.80048 | 0.000183 | 0.040664 | 1.534332 |
| NONHSAT207754.1   | 1.338084 | 1.699827 | 8.788627 | 0.000185 | 0.04083  | 1.527676 |
| lnc-SLC35F5-10:7  | 1.712296 | 6.119105 | 8.782873 | 0.000185 | 0.04083  | 1.524441 |
| ENST00000624760.1 | -1.03672 | 6.994149 | -8.77512 | 0.000186 | 0.04083  | 1.520076 |
| lnc-SMPX-6:1      | 2.30749  | 2.243113 | 8.771571 | 0.000187 | 0.04083  | 1.518077 |
| MSTRG.50587.1     | 2.315093 | 2.178731 | 8.755536 | 0.000188 | 0.040871 | 1.509031 |
| NONHSAT214255.1   | 1.362708 | 5.538865 | 8.755206 | 0.000189 | 0.040871 | 1.508844 |
| MSTRG.6431.1      | 1.534111 | 8.598841 | 8.75216  | 0.000189 | 0.040871 | 1.507123 |
| ENST00000444244.1 | -1.06915 | 10.30884 | -8.74947 | 0.000189 | 0.040871 | 1.505601 |
| lnc-SP3-14:1      | -1.6232  | 3.819826 | -8.74062 | 0.00019  | 0.040871 | 1.500595 |
| ENST00000437080.1 | 1.451957 | 4.964309 | 8.740256 | 0.00019  | 0.040871 | 1.500391 |
| ENST00000649691.1 | 1.13162  | 6.945768 | 8.738518 | 0.00019  | 0.040871 | 1.499408 |
| ENST00000430078.1 | 2.552123 | 4.085521 | 8.732169 | 0.000191 | 0.040871 | 1.495812 |
| MSTRG.16982.1     | 1.998967 | 2.188778 | 8.722516 | 0.000192 | 0.040871 | 1.490339 |
| ENST00000456535.1 | -1.21395 | 1.65     | -8.71925 | 0.000193 | 0.040871 | 1.488486 |
| lnc-C1orf43-1:1   | -1.07581 | 1.685648 | -8.71723 | 0.000193 | 0.040871 | 1.48734  |
| lnc-ATP5F1A-4:1   | -1.44979 | 1.814816 | -8.71131 | 0.000194 | 0.040871 | 1.483974 |
| lnc-C1QTNF9B-3:1  | 2.303896 | 2.864693 | 8.709539 | 0.000194 | 0.040871 | 1.482969 |
| NONHSAT206529.1   | 1.217316 | 3.978597 | 8.709109 | 0.000194 | 0.040871 | 1.482724 |
| lnc-CCL25-1:3     | -1.55762 | 3.708999 | -8.70642 | 0.000194 | 0.040871 | 1.481195 |
| NONHSAT159921.1   | 2.315327 | 2.566713 | 8.70193  | 0.000195 | 0.040871 | 1.478642 |
| MSTRG.61572.1     | 1.702531 | 4.563924 | 8.692067 | 0.000196 | 0.040871 | 1.473026 |
| lnc-MC5R-1:16     | -1.25346 | 4.527937 | -8.69191 | 0.000196 | 0.040871 | 1.472938 |
| lnc-MEIS2-8:1     | -2.20086 | 2.727421 | -8.68842 | 0.000196 | 0.040871 | 1.470948 |
| NONHSAT190227.1   | 1.6275   | 2.601173 | 8.686338 | 0.000196 | 0.040871 | 1.46976  |
| NONHSAT165231.1   | 1.754269 | 2.245301 | 8.676398 | 0.000198 | 0.040871 | 1.464087 |
| lnc-RNF150-7:1    | -1.36438 | 1.944326 | -8.67333 | 0.000198 | 0.040871 | 1.462337 |
| lnc-NPM2-3:1      | -1.33395 | 4.944619 | -8.67064 | 0.000198 | 0.040871 | 1.460796 |
| lnc-RNF149-4:1    | -1.73488 | 2.02752  | -8.66431 | 0.000199 | 0.040871 | 1.45718  |
| NONHSAT177001.1   | 1.799213 | 3.535622 | 8.660942 | 0.000199 | 0.040871 | 1.455252 |
| NONHSAT222775.1   | -1.23764 | 6.355663 | -8.65891 | 0.0002   | 0.040871 | 1.454086 |
| MSTRG.32923.1     | 1.132432 | 7.197451 | 8.653236 | 0.0002   | 0.040871 | 1.450839 |
| NONHSAT167866.1   | 1.699686 | 5.795102 | 8.651226 | 0.000201 | 0.040871 | 1.449688 |
| NONHSAT178987.1   | 1.745192 | 4.252033 | 8.649377 | 0.000201 | 0.040871 | 1.448628 |
| NONHSAT169170.1   | -1.34726 | 3.907015 | -8.64143 | 0.000202 | 0.040871 | 1.444068 |
| T064024           | 1.153461 | 3.786674 | 8.641187 | 0.000202 | 0.040871 | 1.443931 |
| lnc-CLGN-2:1      | -1.61595 | 4.84391  | -8.63728 | 0.000202 | 0.040871 | 1.441686 |
| T278895           | 2.295902 | 2.224713 | 8.631795 | 0.000203 | 0.040871 | 1.438538 |
| NONHSAT188031.1   | 1.539533 | 1.79909  | 8.630098 | 0.000203 | 0.040871 | 1.437562 |

|                   |          |          |          |          |          |          |
|-------------------|----------|----------|----------|----------|----------|----------|
| MSTRG.35862.1     | -1.18578 | 4.074371 | -8.63005 | 0.000203 | 0.040871 | 1.437536 |
| lnc-YWHAZ-4:1     | 1.403748 | 3.863128 | 8.62587  | 0.000204 | 0.040871 | 1.435131 |
| lnc-ANKRD55-8:1   | 2.644144 | 2.920718 | 8.623878 | 0.000204 | 0.040871 | 1.433986 |
| lnc-MVB12B-7:1    | -1.02295 | 5.188478 | -8.62292 | 0.000204 | 0.040871 | 1.433433 |
| lnc-RNASET2-1:8   | -1.62975 | 3.840155 | -8.62243 | 0.000204 | 0.040871 | 1.433151 |
| NONHSAT193617.1   | -1.1133  | 5.201597 | -8.62153 | 0.000204 | 0.040871 | 1.432637 |
| ENST00000561538.1 | 1.384387 | 2.041338 | 8.615801 | 0.000205 | 0.040871 | 1.429337 |
| ENST00000610840.1 | -1.86143 | 4.543845 | -8.61065 | 0.000206 | 0.040871 | 1.426367 |
| lnc-KCNA4-8:1     | -2.15193 | 2.557776 | -8.60823 | 0.000206 | 0.040871 | 1.424977 |
| ENST00000658633.1 | 2.864674 | 2.621217 | 8.60794  | 0.000206 | 0.040871 | 1.424807 |
| lnc-KIAA1328-12:1 | -1.08267 | 5.191679 | -8.605   | 0.000206 | 0.040871 | 1.423114 |
| LINC02143:6       | 1.203382 | 1.817177 | 8.601028 | 0.000207 | 0.040871 | 1.42082  |
| lnc-CCDC82-11:1   | 1.495536 | 1.830058 | 8.599417 | 0.000207 | 0.040871 | 1.41989  |
| MSTRG.47614.1     | -1.34022 | 1.762904 | -8.59889 | 0.000207 | 0.040871 | 1.419585 |
| NONHSAT177159.1   | 1.259085 | 1.749837 | 8.59548  | 0.000207 | 0.040871 | 1.417617 |
| MSTRG.1368.5      | 1.749792 | 1.97606  | 8.595178 | 0.000208 | 0.040871 | 1.417443 |
| MSTRG.48011.1     | 1.025312 | 6.735701 | 8.581655 | 0.000209 | 0.040962 | 1.409625 |
| NONHSAT217314.1   | 1.395834 | 3.843102 | 8.579645 | 0.000209 | 0.040962 | 1.408461 |
| ENST00000374014.3 | 2.45864  | 2.344321 | 8.578035 | 0.00021  | 0.040962 | 1.40753  |
| lnc-BDH2-5:1      | -2.03639 | 3.523205 | -8.5771  | 0.00021  | 0.040962 | 1.406986 |
| lnc-GKN2-1:1      | 1.794567 | 2.018457 | 8.575481 | 0.00021  | 0.040962 | 1.406051 |
| ENST00000666584.1 | 1.298586 | 4.666554 | 8.564827 | 0.000211 | 0.041097 | 1.399876 |
| lnc-CD46-5:3      | -1.07189 | 4.922591 | -8.56205 | 0.000212 | 0.041097 | 1.398266 |
| ENST00000474444.1 | 1.17169  | 6.465654 | 8.560047 | 0.000212 | 0.041097 | 1.397102 |
| POC1B-AS1:29      | -1.90614 | 2.30955  | -8.54736 | 0.000214 | 0.041097 | 1.38973  |
| NONHSAT196460.1   | -1.34127 | 5.490091 | -8.54632 | 0.000214 | 0.041097 | 1.389128 |
| NONHSAT201513.1   | 1.313912 | 5.665675 | 8.545868 | 0.000214 | 0.041097 | 1.388864 |
| lnc-ATP6AP2-11:1  | 1.332872 | 1.750223 | 8.542759 | 0.000214 | 0.041097 | 1.387056 |
| CSTF3-DT:16       | 1.166832 | 8.260982 | 8.541706 | 0.000214 | 0.041097 | 1.386443 |
| MSTRG.60394.1     | -1.68805 | 2.530237 | -8.52877 | 0.000216 | 0.041318 | 1.378909 |
| ENST00000508713.1 | -1.74934 | 5.143066 | -8.52608 | 0.000216 | 0.041318 | 1.377339 |
| NONHSAT196746.1   | 1.859862 | 4.332155 | 8.522196 | 0.000217 | 0.041318 | 1.375074 |
| LINC01117:14      | -2.00319 | 2.873461 | -8.52048 | 0.000217 | 0.041318 | 1.374072 |
| T346136           | -1.8346  | 3.430349 | -8.50729 | 0.000219 | 0.041339 | 1.366367 |
| NONHSAT164997.1   | -1.72748 | 3.217988 | -8.50503 | 0.000219 | 0.041339 | 1.365045 |
| lnc-CRP-2:3       | -1.31784 | 4.900193 | -8.49908 | 0.00022  | 0.041339 | 1.361567 |
| lnc-CLDN5-2:1     | -1.05629 | 5.580592 | -8.49765 | 0.00022  | 0.041339 | 1.360726 |
| NONHSAT162037.1   | -1.34308 | 4.334347 | -8.49739 | 0.00022  | 0.041339 | 1.360576 |
| lnc-RIPK4-4:1     | 1.605229 | 4.736425 | 8.49387  | 0.000221 | 0.041339 | 1.358513 |
| NONHSAT191166.1   | 2.472275 | 2.264059 | 8.491519 | 0.000221 | 0.041339 | 1.357135 |
| ENST00000414452.1 | -1.2044  | 6.62827  | -8.49061 | 0.000221 | 0.041339 | 1.356601 |
| ENST00000617439.1 | -1.06707 | 5.767462 | -8.48909 | 0.000221 | 0.041339 | 1.355714 |
| NR_110607         | -1.24062 | 3.644163 | -8.47984 | 0.000223 | 0.04142  | 1.350287 |
| lnc-PAPOLA-3:1    | 1.19883  | 3.546814 | 8.472611 | 0.000224 | 0.041528 | 1.34604  |
| ENST00000598561.1 | 2.112423 | 2.891501 | 8.458373 | 0.000226 | 0.041642 | 1.337665 |
| lnc-DAGLA-3:2     | 1.988947 | 2.418498 | 8.446611 | 0.000227 | 0.041642 | 1.330735 |
| MSTRG.18857.1     | 1.205955 | 6.129226 | 8.437564 | 0.000229 | 0.041642 | 1.325396 |
| NONHSAT198305.1   | 1.622942 | 1.837935 | 8.436663 | 0.000229 | 0.041642 | 1.324863 |

|                   |          |          |          |          |          |          |
|-------------------|----------|----------|----------|----------|----------|----------|
| ENST00000621404.1 | -1.44198 | 3.380983 | -8.43503 | 0.000229 | 0.041642 | 1.3239   |
| NONHSAT195938.1   | -1.07398 | 1.575678 | -8.43457 | 0.000229 | 0.041642 | 1.323625 |
| ENST00000412485.1 | 1.420847 | 8.727924 | 8.433148 | 0.000229 | 0.041642 | 1.322787 |
| lnc-ATP6V1C1-3:1  | 1.198655 | 1.640702 | 8.431933 | 0.000229 | 0.041642 | 1.322069 |
| lnc-ALDH1B1-8:1   | 1.462687 | 1.794874 | 8.429636 | 0.00023  | 0.041642 | 1.320712 |
| MSTRG.60768.1     | 3.27893  | 3.31264  | 8.426958 | 0.00023  | 0.041642 | 1.319128 |
| PGM5P4-AS1:11     | -1.86558 | 2.29576  | -8.42686 | 0.00023  | 0.041642 | 1.31907  |
| NONHSAT162888.1   | -1.33625 | 4.128107 | -8.42161 | 0.000231 | 0.041642 | 1.315966 |
| NR_002325         | -1.38963 | 10.22261 | -8.42014 | 0.000231 | 0.041642 | 1.315095 |
| lnc-TMPRSS15-22:1 | 1.892923 | 2.617826 | 8.418328 | 0.000231 | 0.041642 | 1.314022 |
| ENST00000452326.1 | -2.11073 | 2.763658 | -8.41695 | 0.000231 | 0.041642 | 1.313205 |
| NONHSAT192126.1   | 2.245696 | 4.670636 | 8.415152 | 0.000232 | 0.041642 | 1.31214  |
| ENST00000511875.1 | 1.929404 | 2.050098 | 8.409611 | 0.000232 | 0.041655 | 1.308857 |
| NONHSAT185214.1   | 2.114985 | 2.147525 | 8.402761 | 0.000233 | 0.041655 | 1.304794 |
| ENST00000588342.1 | -1.02339 | 1.571576 | -8.39905 | 0.000234 | 0.041655 | 1.302591 |
| NONHSAT214838.1   | 1.581158 | 1.858257 | 8.397458 | 0.000234 | 0.041655 | 1.301646 |
| NR_002918         | -1.30338 | 11.69478 | -8.39527 | 0.000235 | 0.041655 | 1.300348 |
| lnc-RAB1A-9:1     | -1.05464 | 2.738286 | -8.3946  | 0.000235 | 0.041655 | 1.299951 |
| NONHSAT216598.1   | 1.272134 | 5.3928   | 8.389733 | 0.000235 | 0.041701 | 1.297056 |
| lnc-MTNR1A-66:1   | -2.35882 | 2.915562 | -8.38712 | 0.000236 | 0.041701 | 1.295503 |
| ENST00000423187.1 | -1.46109 | 4.169704 | -8.37363 | 0.000238 | 0.041801 | 1.287473 |
| NONHSAT212907.1   | 1.855105 | 2.187277 | 8.370163 | 0.000238 | 0.041801 | 1.285406 |
| NONHSAT209795.1   | 1.589764 | 2.015844 | 8.361268 | 0.00024  | 0.041801 | 1.2801   |
| NR_003016         | -1.17223 | 9.976708 | -8.35873 | 0.00024  | 0.041801 | 1.278582 |
| MSTRG.40703.1     | 2.381296 | 2.540009 | 8.358275 | 0.00024  | 0.041801 | 1.278313 |
| ENST00000608684.1 | -1.13984 | 6.643662 | -8.35224 | 0.000241 | 0.041801 | 1.274708 |
| NONHSAT216570.1   | 1.007103 | 1.573373 | 8.351545 | 0.000241 | 0.041801 | 1.274292 |
| lnc-BST2-3:2      | -1.89638 | 4.847789 | -8.34977 | 0.000241 | 0.041801 | 1.273232 |
| ENST00000435108.1 | 1.886581 | 7.277521 | 8.34976  | 0.000241 | 0.041801 | 1.273225 |
| MSTRG.44130.1     | 2.032894 | 2.051051 | 8.349528 | 0.000241 | 0.041801 | 1.273086 |
| lnc-GOLGA8A-2:3   | -1.2444  | 4.35588  | -8.34467 | 0.000242 | 0.041801 | 1.27018  |
| NONHSAT156336.1   | 1.843567 | 2.208758 | 8.343011 | 0.000242 | 0.041801 | 1.269188 |
| lnc-RNF152-7:1    | -1.42547 | 4.116807 | -8.34282 | 0.000242 | 0.041801 | 1.269073 |
| ENST00000503052.3 | -1.18205 | 6.789388 | -8.34141 | 0.000243 | 0.041801 | 1.268228 |
| ENST00000541723.5 | 1.154837 | 4.100981 | 8.325024 | 0.000245 | 0.042158 | 1.258411 |
| lnc-MFSD14B-12:1  | 1.504022 | 4.284963 | 8.316138 | 0.000246 | 0.042214 | 1.253076 |
| MSTRG.13905.1     | -1.89203 | 2.793258 | -8.31329 | 0.000247 | 0.042214 | 1.251366 |
| MSTRG.29979.1     | -2.41191 | 2.942262 | -8.31197 | 0.000247 | 0.042214 | 1.250572 |
| lnc-GABRE-6:1     | 1.202744 | 5.871738 | 8.305431 | 0.000248 | 0.042243 | 1.24664  |
| T109200           | 1.019609 | 1.609793 | 8.301177 | 0.000249 | 0.042284 | 1.24408  |
| ENST00000417927.1 | 1.100935 | 1.771769 | 8.297798 | 0.000249 | 0.042302 | 1.242045 |
| NONHSAT196125.1   | 1.275329 | 4.736028 | 8.293941 | 0.00025  | 0.04233  | 1.239721 |
| lnc-ALCAM-8:7     | 2.058636 | 5.728404 | 8.288812 | 0.000251 | 0.04233  | 1.23663  |
| T193510           | -1.02639 | 4.399018 | -8.28868 | 0.000251 | 0.04233  | 1.236553 |
| MSTRG.59388.1     | -1.79741 | 2.099612 | -8.28339 | 0.000251 | 0.0424   | 1.233357 |
| ENST00000500989.2 | 1.774666 | 3.747184 | 8.279462 | 0.000252 | 0.042433 | 1.230988 |
| MSTRG.20402.1     | -1.05474 | 10.71802 | -8.26745 | 0.000254 | 0.042612 | 1.223726 |
| NR_104999         | -1.44652 | 7.621356 | -8.25775 | 0.000256 | 0.042773 | 1.217856 |

|                   |          |          |          |          |          |          |
|-------------------|----------|----------|----------|----------|----------|----------|
| NONHSAT215966.1   | 1.109197 | 4.108092 | 8.250845 | 0.000257 | 0.042773 | 1.213673 |
| MSTRG.56042.1     | 1.204899 | 7.524096 | 8.245581 | 0.000257 | 0.042844 | 1.21048  |
| lnc-LRRC40-5:1    | -1.19727 | 5.423859 | -8.23856 | 0.000259 | 0.042963 | 1.206217 |
| lnc-PTMA-5:1      | 1.476409 | 3.468828 | 8.232296 | 0.00026  | 0.043061 | 1.202412 |
| NONHSAT197913.1   | -1.18372 | 5.431021 | -8.22314 | 0.000261 | 0.043237 | 1.196841 |
| ENST00000462801.2 | 1.099928 | 4.7199   | 8.215489 | 0.000262 | 0.043306 | 1.192183 |
| MSTRG.4872.1      | -1.1057  | 5.601638 | -8.20341 | 0.000264 | 0.043528 | 1.184818 |
| NONHSAT209413.1   | 1.162584 | 3.927966 | 8.201767 | 0.000265 | 0.043528 | 1.183814 |
| NR_030732         | 1.009827 | 6.7421   | 8.199612 | 0.000265 | 0.043528 | 1.182498 |
| NONHSAT168672.1   | 1.398791 | 1.726058 | 8.191964 | 0.000266 | 0.043666 | 1.177825 |
| lnc-CTAGE1-5:1    | -1.20131 | 2.07489  | -8.18857 | 0.000267 | 0.043666 | 1.175749 |
| lnc-GABRA5-5:1    | -1.75687 | 3.013266 | -8.18687 | 0.000267 | 0.043666 | 1.174711 |
| ENST00000671050.1 | -1.83677 | 2.663702 | -8.18395 | 0.000268 | 0.043676 | 1.172924 |
| NONHSAT177579.1   | 2.120505 | 2.084854 | 8.177568 | 0.000269 | 0.043729 | 1.169014 |
| ENST00000566876.1 | 1.178373 | 1.650095 | 8.176958 | 0.000269 | 0.043729 | 1.16864  |
| ENST00000513871.1 | 1.903865 | 2.133623 | 8.166914 | 0.000271 | 0.043937 | 1.162482 |
| lnc-CD163-3:1     | -2.3071  | 2.672362 | -8.15744 | 0.000272 | 0.04413  | 1.156667 |
| lnc-WNT7B-4:1     | 1.855847 | 6.141373 | 8.152312 | 0.000273 | 0.044203 | 1.153514 |
| NONHSAT220592.1   | -1.02234 | 3.569515 | -8.13365 | 0.000276 | 0.044529 | 1.142027 |
| lnc-XRN2-7:1      | 1.62235  | 2.611713 | 8.128138 | 0.000277 | 0.044529 | 1.138625 |
| NONHSAT170341.1   | 1.776784 | 2.146507 | 8.128073 | 0.000277 | 0.044529 | 1.138585 |
| lnc-DNAJC24-8:1   | 1.896399 | 2.313363 | 8.126953 | 0.000278 | 0.044529 | 1.137894 |
| NONHSAT186705.1   | 1.274966 | 4.469577 | 8.125184 | 0.000278 | 0.044529 | 1.136803 |
| NONHSAT200337.1   | 1.658458 | 3.450632 | 8.120109 | 0.000279 | 0.044545 | 1.133669 |
| lnc-PSG2-3:1      | 1.629913 | 5.192049 | 8.113526 | 0.00028  | 0.044609 | 1.129601 |
| ENST00000653036.1 | 1.224672 | 5.017372 | 8.112169 | 0.00028  | 0.044609 | 1.128762 |
| NONHSAT221857.1   | -1.1406  | 4.997469 | -8.11042 | 0.00028  | 0.044609 | 1.127678 |
| lnc-CCKAR-6:1     | 1.472034 | 4.301856 | 8.107849 | 0.000281 | 0.044612 | 1.12609  |
| lnc-FOXO4-5:1     | -1.35234 | 5.292348 | -8.10105 | 0.000282 | 0.044735 | 1.12188  |
| MSTRG.61221.1     | 2.705937 | 5.406902 | 8.096558 | 0.000283 | 0.044793 | 1.119098 |
| LINC01571:14      | 1.045231 | 7.808107 | 8.093004 | 0.000284 | 0.044825 | 1.116895 |
| NONHSAT149227.1   | -1.11346 | 5.798928 | -8.08856 | 0.000284 | 0.044882 | 1.11414  |
| NONHSAT218748.1   | 1.267307 | 3.869358 | 8.069126 | 0.000288 | 0.045271 | 1.102064 |
| lnc-SH3GL2-1:1    | -1.14746 | 4.727226 | -8.06513 | 0.000289 | 0.045271 | 1.099579 |
| MSTRG.6762.4      | 1.625967 | 1.828394 | 8.063109 | 0.000289 | 0.045271 | 1.098319 |
| lnc-CHST15-1:2    | 2.073082 | 2.057458 | 8.061733 | 0.000289 | 0.045271 | 1.097462 |
| RBMS3-AS3:6       | -1.0786  | 7.146954 | -8.05964 | 0.00029  | 0.045271 | 1.09616  |
| NONHSAT167733.1   | 2.093273 | 2.158603 | 8.053481 | 0.000291 | 0.045271 | 1.09232  |
| lnc-RAB3C-4:1     | 1.512509 | 2.889116 | 8.0516   | 0.000291 | 0.045271 | 1.091146 |
| T118756           | 1.693044 | 4.138788 | 8.040578 | 0.000293 | 0.045409 | 1.084266 |
| lnc-SMC6-2:1      | -1.32354 | 1.99526  | -8.0365  | 0.000294 | 0.045409 | 1.08172  |
| ENST00000454526.1 | 1.559904 | 3.177307 | 8.032909 | 0.000295 | 0.045444 | 1.079473 |
| MSTRG.29537.16    | -1.89281 | 3.742442 | -8.02816 | 0.000296 | 0.045444 | 1.076502 |
| lnc-HRH3-2:1      | -1.04017 | 2.232144 | -8.01912 | 0.000297 | 0.04557  | 1.070841 |
| NONHSAT200647.1   | 1.497893 | 2.269999 | 8.006193 | 0.0003   | 0.04568  | 1.062733 |
| NONHSAT203154.1   | 1.048824 | 6.322527 | 8.004816 | 0.0003   | 0.04568  | 1.061868 |
| NONHSAT157973.1   | 1.77799  | 3.627881 | 8.003841 | 0.0003   | 0.04568  | 1.061256 |
| NONHSAT158772.1   | -1.16078 | 1.676319 | -8.00206 | 0.000301 | 0.04568  | 1.060137 |

|                   |          |          |          |          |          |          |
|-------------------|----------|----------|----------|----------|----------|----------|
| T165321           | -1.78409 | 2.463869 | -8.00198 | 0.000301 | 0.04568  | 1.060084 |
| ENST00000665254.1 | -1.68637 | 2.607213 | -8.00077 | 0.000301 | 0.04568  | 1.059325 |
| ENST00000570409.1 | -1.32708 | 5.833431 | -7.99759 | 0.000302 | 0.04568  | 1.057327 |
| lnc-FBXW11-4:1    | -1.87588 | 2.655812 | -7.99663 | 0.000302 | 0.04568  | 1.056728 |
| MSTRG.45337.1     | 1.285145 | 7.031486 | 7.986982 | 0.000304 | 0.045758 | 1.050655 |
| NONHSAT153483.1   | 2.045295 | 6.251012 | 7.985368 | 0.000304 | 0.045758 | 1.049639 |
| lnc-TLX3-3:1      | -2.06879 | 2.375139 | -7.97407 | 0.000306 | 0.045806 | 1.042518 |
| lnc-NAV1-2:5      | -1.87862 | 2.352401 | -7.97389 | 0.000306 | 0.045806 | 1.042403 |
| NR_028348         | 1.246986 | 3.378498 | 7.970506 | 0.000307 | 0.045839 | 1.040271 |
| ENST00000602789.1 | -2.46977 | 2.975522 | -7.9634  | 0.000308 | 0.045982 | 1.035784 |
| NONHSAT166887.1   | -1.50843 | 2.023391 | -7.95227 | 0.000311 | 0.046246 | 1.028749 |
| ENST00000504082.1 | -1.35627 | 4.262399 | -7.94282 | 0.000312 | 0.046264 | 1.02277  |
| MSTRG.48865.1     | -1.02413 | 5.841162 | -7.94115 | 0.000313 | 0.046264 | 1.021708 |
| NONHSAT150534.1   | 1.347448 | 7.073616 | 7.940337 | 0.000313 | 0.046264 | 1.021193 |
| MSTRG.18207.1     | 1.51052  | 2.105618 | 7.930714 | 0.000315 | 0.046418 | 1.015091 |
| MSTRG.27914.1     | 2.065916 | 2.11294  | 7.924219 | 0.000316 | 0.046546 | 1.010967 |
| MSTRG.48292.1     | -1.09719 | 3.786598 | -7.91608 | 0.000318 | 0.046642 | 1.005794 |
| lnc-CNIH1-3:1     | -1.19567 | 7.340357 | -7.91436 | 0.000318 | 0.046642 | 1.004698 |
| NR_002952         | -1.01669 | 9.613039 | -7.90958 | 0.000319 | 0.046719 | 1.001661 |
| T285662           | -1.45182 | 3.263318 | -7.89738 | 0.000322 | 0.046939 | 0.993889 |
| lnc-POC5-3:1      | -1.18526 | 8.422536 | -7.89582 | 0.000322 | 0.046939 | 0.992891 |
| lnc-RTP2-1:2      | -2.03389 | 2.177128 | -7.89408 | 0.000322 | 0.046939 | 0.99178  |
| T188397           | -1.59694 | 1.89828  | -7.89249 | 0.000323 | 0.046939 | 0.990767 |
| lnc-METTL15-5:3   | -1.21819 | 5.255282 | -7.88804 | 0.000324 | 0.046971 | 0.987929 |
| MSTRG.30609.2     | -1.09547 | 5.458468 | -7.88047 | 0.000325 | 0.047068 | 0.983093 |
| NONHSAT218594.1   | 1.344518 | 5.742994 | 7.869925 | 0.000328 | 0.047258 | 0.976345 |
| lnc-NAA16-1:1     | 1.846039 | 3.201593 | 7.861769 | 0.000329 | 0.047259 | 0.97112  |
| lnc-TUBE1-3:1     | 2.156436 | 5.165022 | 7.861253 | 0.000329 | 0.047259 | 0.970789 |
| ENST00000618697.1 | -1.24084 | 6.308909 | -7.86066 | 0.00033  | 0.047259 | 0.97041  |
| NONHSAT174829.1   | -1.47582 | 10.72344 | -7.85946 | 0.00033  | 0.047259 | 0.969638 |
| NONHSAT201469.1   | 1.036832 | 6.751156 | 7.856532 | 0.00033  | 0.047259 | 0.967763 |
| lnc-CDY2B-13:1    | -1.04594 | 5.783458 | -7.85558 | 0.000331 | 0.047259 | 0.967153 |
| ENST00000526186.1 | 1.003385 | 3.869252 | 7.852548 | 0.000331 | 0.047259 | 0.965206 |
| lnc-ARL4A-3:1     | -1.01297 | 4.08093  | -7.84786 | 0.000332 | 0.047259 | 0.962199 |
| NONHSAT165582.1   | 1.551765 | 4.614453 | 7.845999 | 0.000333 | 0.047259 | 0.961001 |
| NONHSAT172234.1   | 1.373844 | 3.735783 | 7.844061 | 0.000333 | 0.047259 | 0.959756 |
| lnc-CSNK1G1-1:3   | -1.03177 | 6.480356 | -7.84364 | 0.000333 | 0.047259 | 0.959486 |
| lnc-GINS2-2:4     | 2.497015 | 3.320882 | 7.841216 | 0.000334 | 0.047259 | 0.957928 |
| NONHSAT212461.1   | -1.31616 | 4.600724 | -7.83295 | 0.000336 | 0.047259 | 0.952608 |
| NONHSAT204473.1   | -1.18762 | 4.420491 | -7.83207 | 0.000336 | 0.047259 | 0.952042 |
| NONHSAT201745.1   | -1.14487 | 1.718083 | -7.82679 | 0.000337 | 0.047259 | 0.948646 |
| T194191           | 1.904356 | 2.377764 | 7.825596 | 0.000337 | 0.047259 | 0.947876 |
| NONHSAT197657.1   | -2.15909 | 2.199195 | -7.82474 | 0.000337 | 0.047259 | 0.947323 |
| lnc-IGSF10-4:1    | 1.519852 | 5.658953 | 7.824635 | 0.000337 | 0.047259 | 0.947256 |
| lnc-TTC13-3:1     | 1.599905 | 1.910879 | 7.822455 | 0.000338 | 0.047259 | 0.945851 |
| NONHSAT217271.1   | -1.49165 | 4.29915  | -7.81457 | 0.00034  | 0.047259 | 0.940766 |
| NONHSAT201383.1   | 1.069629 | 1.733646 | 7.812246 | 0.00034  | 0.047259 | 0.939266 |
| T184755           | 1.102442 | 5.040789 | 7.811771 | 0.00034  | 0.047259 | 0.938959 |

|                   |          |          |          |          |          |          |
|-------------------|----------|----------|----------|----------|----------|----------|
| MSTRG.11313.4     | 1.564064 | 5.259843 | 7.810455 | 0.000341 | 0.047259 | 0.93811  |
| ENST00000412996.1 | -1.1949  | 3.746944 | -7.80905 | 0.000341 | 0.047259 | 0.937199 |
| lnc-INHBC-1:3     | -1.69008 | 3.234356 | -7.80798 | 0.000341 | 0.047259 | 0.936509 |
| NONHSAT197998.1   | 1.088531 | 3.251824 | 7.800152 | 0.000343 | 0.047266 | 0.931453 |
| NONHSAT154345.1   | -1.17384 | 5.08166  | -7.79971 | 0.000343 | 0.047266 | 0.931165 |
| NONHSAT218479.1   | 1.327516 | 1.882879 | 7.797781 | 0.000344 | 0.047266 | 0.929919 |
| NONHSAT191848.1   | 1.690371 | 4.228726 | 7.797596 | 0.000344 | 0.047266 | 0.929799 |
| MSTRG.51115.1     | 1.544974 | 2.086995 | 7.793439 | 0.000344 | 0.047266 | 0.92711  |
| NONHSAT167810.1   | 1.551352 | 1.815783 | 7.787578 | 0.000346 | 0.047266 | 0.923314 |
| MSTRG.5185.1      | -1.07204 | 4.336494 | -7.78657 | 0.000346 | 0.047266 | 0.922659 |
| NONHSAT154027.1   | -1.24688 | 3.336218 | -7.78402 | 0.000347 | 0.047266 | 0.921009 |
| NONHSAT206219.1   | 2.022332 | 5.45067  | 7.782981 | 0.000347 | 0.047266 | 0.920335 |
| ENST00000547084.1 | 2.526733 | 4.411034 | 7.782739 | 0.000347 | 0.047266 | 0.920178 |
| lnc-DEGS2-2:7     | -1.45923 | 2.868504 | -7.7797  | 0.000348 | 0.047266 | 0.918205 |
| lnc-ECHDC1-3:2    | -1.51827 | 4.8759   | -7.77678 | 0.000348 | 0.047266 | 0.916316 |
| ENST00000658275.1 | 1.26395  | 5.850726 | 7.774794 | 0.000349 | 0.047266 | 0.915025 |
| ENST00000614966.1 | -1.0385  | 7.047244 | -7.76835 | 0.00035  | 0.04739  | 0.910841 |
| MSTRG.31522.1     | -1.17439 | 5.22265  | -7.76455 | 0.000351 | 0.04739  | 0.908373 |
| ENST00000421206.1 | -1.27184 | 5.201183 | -7.76424 | 0.000351 | 0.04739  | 0.908169 |
| NR_002912         | -1.1643  | 12.99009 | -7.76273 | 0.000352 | 0.04739  | 0.90719  |
| ENST00000325042.2 | -1.05097 | 7.553376 | -7.75839 | 0.000353 | 0.0474   | 0.904363 |
| lnc-ZCCHC24-9:1   | 1.803175 | 3.875228 | 7.755179 | 0.000353 | 0.047407 | 0.902276 |
| lnc-ARL4C-13:1    | -1.96049 | 2.319495 | -7.75415 | 0.000354 | 0.047407 | 0.901604 |
| MSTRG.44762.38    | -1.60015 | 2.822381 | -7.74451 | 0.000356 | 0.047596 | 0.895327 |
| lnc-SNX8-3:1      | 1.542839 | 6.312031 | 7.740712 | 0.000357 | 0.047596 | 0.892851 |
| NONHSAT183346.1   | 1.512273 | 4.570662 | 7.737799 | 0.000357 | 0.047596 | 0.89095  |
| FTX:24            | -1.01573 | 5.848188 | -7.73708 | 0.000358 | 0.047596 | 0.890479 |
| NONHSAT156338.1   | 2.330512 | 3.761886 | 7.734752 | 0.000358 | 0.047596 | 0.888962 |
| MSTRG.56204.1     | -2.00975 | 3.049424 | -7.73394 | 0.000358 | 0.047596 | 0.888431 |
| lnc-DAW1-5:1      | -1.53191 | 4.854847 | -7.7276  | 0.00036  | 0.047596 | 0.884291 |
| lnc-CREBL2-3:1    | -1.71224 | 2.474949 | -7.72393 | 0.000361 | 0.047596 | 0.88189  |
| NONHSAT201972.1   | 1.368203 | 6.624553 | 7.721727 | 0.000361 | 0.047596 | 0.880451 |
| NONHSAT153476.1   | 1.119883 | 6.076709 | 7.718606 | 0.000362 | 0.047596 | 0.87841  |
| ENST00000520426.1 | 2.580473 | 2.898899 | 7.716911 | 0.000362 | 0.047596 | 0.877301 |
| NONHSAT199158.1   | -1.12434 | 1.812943 | -7.71232 | 0.000364 | 0.047596 | 0.874294 |
| T146532           | 1.211405 | 6.645283 | 7.707324 | 0.000365 | 0.047596 | 0.871022 |
| lnc-SNTB1-3:1     | -1.06679 | 6.13742  | -7.70328 | 0.000366 | 0.047596 | 0.868371 |
| ENST00000471921.2 | 1.806611 | 2.017889 | 7.703174 | 0.000366 | 0.047596 | 0.868302 |
| NONHSAT184521.1   | 1.694734 | 2.094954 | 7.696482 | 0.000367 | 0.047596 | 0.863911 |
| NONHSAT175386.1   | -1.87282 | 3.522598 | -7.69253 | 0.000368 | 0.047596 | 0.861315 |
| ENST00000622740.3 | 1.026738 | 1.558911 | 7.690643 | 0.000369 | 0.047596 | 0.860076 |
| lnc-C9orf92-2:1   | -1.12847 | 4.365236 | -7.68752 | 0.00037  | 0.047596 | 0.858024 |
| lnc-PIEZO2-9:1    | 1.324888 | 7.023692 | 7.687256 | 0.00037  | 0.047596 | 0.857851 |
| lnc-BATF-1:1      | -1.92426 | 6.376442 | -7.68323 | 0.000371 | 0.047596 | 0.855207 |
| ENST00000658676.1 | 1.265513 | 2.706643 | 7.682441 | 0.000371 | 0.047596 | 0.854685 |
| NONHSAT190544.1   | 2.263826 | 3.332199 | 7.680287 | 0.000371 | 0.047596 | 0.853268 |
| ENST00000609497.5 | 1.6468   | 2.220702 | 7.680084 | 0.000371 | 0.047596 | 0.853134 |
| NONHSAT167487.1   | 1.038156 | 5.585088 | 7.677559 | 0.000372 | 0.047596 | 0.851473 |

|                   |          |          |          |          |          |          |
|-------------------|----------|----------|----------|----------|----------|----------|
| lnc-BTN3A2-1:4    | -1.31805 | 1.975176 | -7.67685 | 0.000372 | 0.047596 | 0.851009 |
| MSTRG.19675.1     | -1.196   | 3.059792 | -7.67247 | 0.000373 | 0.047596 | 0.848119 |
| NONHSAT155053.1   | 1.364329 | 6.153431 | 7.667793 | 0.000374 | 0.047596 | 0.84504  |
| NONHSAT216432.1   | 1.775432 | 6.763035 | 7.664714 | 0.000375 | 0.047596 | 0.84301  |
| NR_026813         | -1.09173 | 8.568336 | -7.66255 | 0.000376 | 0.047596 | 0.841585 |
| ENST00000428646.1 | 1.103835 | 6.989154 | 7.660899 | 0.000376 | 0.047596 | 0.840494 |
| NONHSAT169833.1   | 1.005527 | 5.539118 | 7.65083  | 0.000379 | 0.047722 | 0.833845 |
| lnc-HILPDA-1:6    | -1.34288 | 3.568514 | -7.64717 | 0.00038  | 0.047722 | 0.83143  |
| lnc-TOX3-6:1      | -1.05428 | 4.612622 | -7.64455 | 0.00038  | 0.047722 | 0.829695 |
| NONHSAT196576.1   | 1.05763  | 1.561059 | 7.644367 | 0.00038  | 0.047722 | 0.829573 |
| lnc-RFX3-4:1      | -1.25098 | 4.83229  | -7.64167 | 0.000381 | 0.047722 | 0.827793 |
| lnc-NBPF3-9:1     | -1.52411 | 2.584374 | -7.63755 | 0.000382 | 0.047722 | 0.825063 |
| NONHSAT172317.1   | 1.491802 | 1.852903 | 7.627217 | 0.000385 | 0.047722 | 0.818216 |
| ENST00000454135.1 | 1.262617 | 4.149039 | 7.625707 | 0.000385 | 0.047722 | 0.817216 |
| MSTRG.7158.1      | -1.19525 | 3.314362 | -7.62548 | 0.000385 | 0.047722 | 0.817064 |
| NONHSAT163834.1   | 1.353635 | 5.13375  | 7.623699 | 0.000386 | 0.047722 | 0.815884 |
| T133891           | 1.393401 | 3.929686 | 7.618619 | 0.000387 | 0.047722 | 0.812512 |
| lnc-EMSY-1:1      | 1.023673 | 6.777195 | 7.612533 | 0.000389 | 0.047722 | 0.80847  |
| NONHSAT196935.1   | -1.09017 | 4.055862 | -7.61093 | 0.000389 | 0.047722 | 0.807405 |
| lnc-FRA10AC1-3:1  | 1.119093 | 4.879601 | 7.607559 | 0.00039  | 0.047773 | 0.805164 |
| lnc-IQCA1-3:1     | -1.93875 | 2.500542 | -7.60345 | 0.000391 | 0.047847 | 0.802432 |
| NONHSAT214652.1   | 1.592055 | 3.596741 | 7.600648 | 0.000392 | 0.04787  | 0.800567 |
| NONHSAT190511.1   | 2.743118 | 2.718617 | 7.593334 | 0.000394 | 0.04787  | 0.795696 |
| ENST00000554679.1 | 1.101108 | 5.041226 | 7.59309  | 0.000394 | 0.04787  | 0.795534 |
| lnc-JAKMIP2-2:1   | -1.86982 | 4.294525 | -7.59218 | 0.000394 | 0.04787  | 0.794927 |
| ENST00000656790.1 | -1.64831 | 4.902792 | -7.58866 | 0.000395 | 0.047919 | 0.792581 |
| MSTRG.40328.2     | 1.845453 | 6.340686 | 7.58397  | 0.000396 | 0.048014 | 0.789453 |
| lnc-GLT1D1-2:3    | 1.643747 | 6.238476 | 7.578862 | 0.000398 | 0.048122 | 0.786044 |
| lnc-ROCK1-2:2     | -1.70026 | 2.201615 | -7.57526 | 0.000399 | 0.048123 | 0.783638 |
| NONHSAT210220.1   | 1.317822 | 4.350464 | 7.570409 | 0.0004   | 0.048195 | 0.780396 |
| MSTRG.4395.1      | -1.06792 | 3.14937  | -7.56868 | 0.0004   | 0.048195 | 0.779239 |
| lnc-CD72-1:1      | -1.14431 | 3.740135 | -7.56776 | 0.000401 | 0.048195 | 0.778625 |
| NONHSAT173809.1   | 1.3542   | 8.068451 | 7.557232 | 0.000403 | 0.048223 | 0.771579 |
| T296710           | 2.028247 | 2.642023 | 7.556684 | 0.000404 | 0.048223 | 0.771212 |
| MSTRG.17656.1     | -1.59152 | 2.13307  | -7.55635 | 0.000404 | 0.048223 | 0.770986 |
| MSTRG.5674.1      | 1.709444 | 3.987488 | 7.5563   | 0.000404 | 0.048223 | 0.770954 |
| lnc-CCT6B-6:2     | 1.187488 | 1.706344 | 7.554605 | 0.000404 | 0.048223 | 0.769819 |
| MSTRG.61533.1     | 2.387116 | 2.589011 | 7.549999 | 0.000405 | 0.04826  | 0.766732 |
| MSTRG.38875.1     | 2.097012 | 4.923783 | 7.541686 | 0.000408 | 0.048382 | 0.761154 |
| ENST00000664386.1 | 1.181993 | 1.694458 | 7.537882 | 0.000409 | 0.048382 | 0.7586   |
| ENST00000621477.1 | -1.64978 | 4.227164 | -7.53527 | 0.000409 | 0.048382 | 0.756846 |
| lnc-ARF6-8:1      | 1.421669 | 3.711816 | 7.531399 | 0.000411 | 0.048382 | 0.754244 |
| NONHSAT188590.1   | 1.459217 | 1.939586 | 7.528449 | 0.000411 | 0.048382 | 0.75226  |
| ENST00000563624.1 | -1.44632 | 4.975431 | -7.52696 | 0.000412 | 0.048382 | 0.751258 |
| NONHSAT212456.1   | -1.63404 | 2.084956 | -7.52105 | 0.000413 | 0.048382 | 0.747281 |
| lnc-OLFM4-12:1    | -1.6682  | 1.953027 | -7.51674 | 0.000415 | 0.048382 | 0.744374 |
| lnc-FAM81B-1:1    | 1.75104  | 5.205513 | 7.513796 | 0.000415 | 0.048382 | 0.742393 |
| lnc-BCL7C-1:2     | 1.135469 | 7.577693 | 7.511538 | 0.000416 | 0.048382 | 0.740871 |



|                   |          |          |          |          |          |          |
|-------------------|----------|----------|----------|----------|----------|----------|
| NONHSAT180081.1   | 1.199008 | 6.206769 | 7.507493 | 0.000417 | 0.048382 | 0.738143 |
| ENST00000644259.1 | 2.75763  | 2.905993 | 7.503284 | 0.000418 | 0.048382 | 0.735303 |
| MSTRG.2407.1      | -1.14777 | 6.581589 | -7.499   | 0.00042  | 0.048382 | 0.732407 |
| NR_125909         | 1.04055  | 2.613547 | 7.497858 | 0.00042  | 0.048382 | 0.731638 |
| lnc-RPS12-6:1     | -1.68483 | 2.934245 | -7.49575 | 0.000421 | 0.048382 | 0.730217 |
| NONHSAT148297.1   | 1.390852 | 1.790825 | 7.492465 | 0.000422 | 0.048382 | 0.727993 |
| lnc-PRSS16-1:1    | -1.06583 | 5.23094  | -7.48264 | 0.000424 | 0.048382 | 0.721348 |
| MSTRG.47492.1     | 1.099752 | 5.337912 | 7.482161 | 0.000425 | 0.048382 | 0.721021 |
| lnc-AMELY-24:1    | 1.113163 | 4.139292 | 7.481195 | 0.000425 | 0.048382 | 0.720367 |
| NONHSAT223809.1   | 1.048576 | 5.295182 | 7.480911 | 0.000425 | 0.048382 | 0.720174 |
| lnc-P3H2-7:1      | 1.687028 | 1.880539 | 7.480601 | 0.000425 | 0.048382 | 0.719965 |
| NONHSAT160087.1   | -1.81239 | 5.51807  | -7.48054 | 0.000425 | 0.048382 | 0.719926 |
| T108433           | 1.684823 | 2.352857 | 7.480489 | 0.000425 | 0.048382 | 0.719889 |
| NONHSAT186528.1   | 1.699649 | 1.942952 | 7.474162 | 0.000427 | 0.048382 | 0.715601 |
| MSTRG.9065.1      | 1.307484 | 2.035964 | 7.474061 | 0.000427 | 0.048382 | 0.715533 |
| ENST00000558175.1 | -1.09664 | 3.435739 | -7.47013 | 0.000428 | 0.048382 | 0.712864 |
| MSTRG.56561.1     | -1.01024 | 5.983419 | -7.46897 | 0.000428 | 0.048382 | 0.712082 |
| NONHSAT169054.1   | 1.337024 | 4.970651 | 7.467522 | 0.000429 | 0.048382 | 0.711097 |
| lnc-TMEM170B-5:3  | -1.06269 | 5.035224 | -7.46681 | 0.000429 | 0.048382 | 0.710613 |
| MSTRG.44418.1     | 1.163425 | 1.625151 | 7.465925 | 0.000429 | 0.048382 | 0.710014 |
| NONHSAT199468.1   | -1.12418 | 5.646777 | -7.46513 | 0.00043  | 0.048382 | 0.709471 |
| NONHSAT205252.1   | 1.822943 | 1.933818 | 7.460635 | 0.000431 | 0.048382 | 0.706421 |
| ENST00000607625.1 | -1.10127 | 6.52185  | -7.4546  | 0.000433 | 0.048382 | 0.702319 |
| MSTRG.35113.1     | 1.824848 | 3.745871 | 7.451513 | 0.000434 | 0.048382 | 0.700221 |
| NONHSAT203890.1   | 1.638796 | 5.711262 | 7.448182 | 0.000435 | 0.048382 | 0.697955 |
| NONHSAT153878.1   | 1.275711 | 5.091232 | 7.440858 | 0.000437 | 0.048382 | 0.692968 |
| lnc-GAPVD1-6:1    | -1.19659 | 6.626308 | -7.43515 | 0.000438 | 0.048382 | 0.689081 |
| lnc-GCM1-2:1      | 1.685706 | 1.900984 | 7.432638 | 0.000439 | 0.048382 | 0.687365 |
| ENST00000668724.1 | 1.812845 | 4.365594 | 7.431392 | 0.00044  | 0.048382 | 0.686515 |
| lnc-CSN2-1:1      | 2.455854 | 3.089587 | 7.431147 | 0.00044  | 0.048382 | 0.686348 |
| NONHSAT164348.1   | 1.455537 | 1.808004 | 7.429831 | 0.00044  | 0.048382 | 0.685449 |
| NR_002981         | -1.26552 | 7.903821 | -7.42674 | 0.000441 | 0.048382 | 0.683338 |
| NONHSAT164531.1   | 2.294935 | 2.493743 | 7.424097 | 0.000442 | 0.048382 | 0.681536 |
| NONHSAT217822.1   | 1.362711 | 4.698202 | 7.42358  | 0.000442 | 0.048382 | 0.681182 |
| T096031           | 1.178175 | 4.090819 | 7.420384 | 0.000443 | 0.048383 | 0.678999 |
| NONHSAT223796.1   | 1.462409 | 2.450013 | 7.412731 | 0.000445 | 0.048437 | 0.673767 |
| MSTRG.29811.1     | -1.54568 | 2.451454 | -7.41249 | 0.000445 | 0.048437 | 0.673604 |
| MSTRG.42434.19    | 1.966932 | 2.416744 | 7.395714 | 0.00045  | 0.048829 | 0.662112 |
| NONHSAT201516.1   | 2.592659 | 4.728291 | 7.394381 | 0.000451 | 0.048829 | 0.661198 |
| NONHSAT174350.1   | 1.538238 | 5.715617 | 7.384186 | 0.000454 | 0.048969 | 0.6542   |
| MSTRG.49244.1     | -1.91892 | 3.141794 | -7.37377 | 0.000457 | 0.049126 | 0.647037 |
| MSTRG.17010.45    | -1.86929 | 2.937116 | -7.37038 | 0.000458 | 0.049126 | 0.644708 |
| NONHSAT153862.1   | 1.095191 | 1.785067 | 7.368762 | 0.000459 | 0.049126 | 0.643593 |
| NONHSAT179831.1   | -1.28296 | 3.939829 | -7.36722 | 0.000459 | 0.049126 | 0.642533 |
| MSTRG.54710.1     | 1.961488 | 2.064042 | 7.359736 | 0.000462 | 0.04913  | 0.637374 |
| MSTRG.42584.1     | 2.327437 | 2.406724 | 7.358197 | 0.000462 | 0.04913  | 0.636313 |
| NONHSAT169815.1   | -1.05724 | 6.879252 | -7.3571  | 0.000463 | 0.04913  | 0.635554 |
| T262630           | 1.087302 | 5.810605 | 7.354978 | 0.000463 | 0.04913  | 0.634093 |

|                   |          |          |          |          |          |          |
|-------------------|----------|----------|----------|----------|----------|----------|
| NONHSAT154432.1   | 1.775016 | 4.09937  | 7.35335  | 0.000464 | 0.04913  | 0.63297  |
| MSTRG.35536.1     | -1.50207 | 4.552332 | -7.35299 | 0.000464 | 0.04913  | 0.632721 |
| NONHSAT187793.1   | 1.082568 | 5.032359 | 7.349205 | 0.000465 | 0.04913  | 0.630109 |
| NR_003521         | -1.12621 | 4.64655  | -7.34499 | 0.000467 | 0.04913  | 0.6272   |
| NONHSAT205166.1   | 2.031891 | 2.091617 | 7.344921 | 0.000467 | 0.04913  | 0.627151 |
| NONHSAT188190.1   | 1.001598 | 5.81271  | 7.344669 | 0.000467 | 0.04913  | 0.626976 |
| NONHSAT169886.1   | 1.286891 | 1.724493 | 7.338907 | 0.000469 | 0.049208 | 0.622994 |
| MSTRG.25437.1     | 1.331533 | 2.101717 | 7.335969 | 0.00047  | 0.049208 | 0.620961 |
| MSTRG.51109.1     | 1.293617 | 10.07664 | 7.335603 | 0.00047  | 0.049208 | 0.620708 |
| T066611           | 1.123582 | 5.292977 | 7.333459 | 0.00047  | 0.049208 | 0.619225 |
| lnc-GUSB-1:1      | -1.12069 | 3.59462  | -7.33312 | 0.00047  | 0.049208 | 0.618993 |
| NONHSAT171732.1   | 1.493633 | 1.765077 | 7.332813 | 0.000471 | 0.049208 | 0.618778 |
| T200023           | -1.52665 | 2.162433 | -7.32649 | 0.000473 | 0.049225 | 0.614396 |
| ENST00000620192.1 | -1.00275 | 5.926493 | -7.32644 | 0.000473 | 0.049225 | 0.614366 |
| MSTRG.29239.7     | -1.93464 | 2.498884 | -7.32602 | 0.000473 | 0.049225 | 0.614072 |
| MSTRG.52104.1     | -1.26264 | 2.038448 | -7.32511 | 0.000473 | 0.049225 | 0.61344  |
| lnc-RNF20-5:1     | -2.19789 | 2.53795  | -7.31734 | 0.000476 | 0.049441 | 0.608054 |
| ENST00000431376.1 | -1.2171  | 3.905671 | -7.31164 | 0.000478 | 0.049474 | 0.6041   |
| NONHSAT199381.1   | -1.50415 | 1.812852 | -7.30839 | 0.000479 | 0.049474 | 0.601844 |
| NR_026874         | 1.263914 | 5.654085 | 7.305781 | 0.000479 | 0.049474 | 0.600031 |
| NONHSAT213855.1   | 2.538166 | 2.53851  | 7.303122 | 0.00048  | 0.049474 | 0.598184 |
| lnc-SLC3A1-3:1    | -1.05452 | 6.328057 | -7.29837 | 0.000482 | 0.049576 | 0.594877 |
| ENST00000572573.2 | 1.029584 | 1.589019 | 7.293103 | 0.000484 | 0.049576 | 0.591214 |
| lnc-ZNRF4-3:1     | 1.775096 | 4.983931 | 7.290932 | 0.000484 | 0.049576 | 0.589702 |
| NONHSAT181782.1   | 1.079214 | 1.632673 | 7.289504 | 0.000485 | 0.049576 | 0.588707 |
| MSTRG.11604.15    | -1.04674 | 6.809829 | -7.28716 | 0.000486 | 0.049576 | 0.587078 |
| ENST00000608871.2 | -1.21359 | 6.720447 | -7.28485 | 0.000487 | 0.049576 | 0.585463 |
| LINC00920:1       | -1.57495 | 4.67159  | -7.2842  | 0.000487 | 0.049576 | 0.58501  |
| NONHSAT218360.1   | 1.014109 | 5.653701 | 7.28371  | 0.000487 | 0.049576 | 0.58467  |
| lnc-EPSTI1-5:2    | 2.022318 | 2.385086 | 7.2827   | 0.000487 | 0.049576 | 0.583966 |
| NR_105061         | 1.545064 | 5.236231 | 7.278798 | 0.000489 | 0.049615 | 0.581245 |
| ENST00000581489.1 | -1.48636 | 2.042452 | -7.27869 | 0.000489 | 0.049615 | 0.581172 |
| NONHSAT209967.1   | 1.095251 | 3.26298  | 7.272334 | 0.000491 | 0.049738 | 0.576733 |
| NR_002731         | 1.381948 | 5.66454  | 7.270741 | 0.000491 | 0.049738 | 0.575621 |
| NONHSAT174759.1   | -1.03696 | 7.968947 | -7.26676 | 0.000493 | 0.049738 | 0.572841 |
| ENST00000606330.1 | 1.68118  | 4.431784 | 7.26495  | 0.000493 | 0.049738 | 0.571574 |
| NONHSAT153890.1   | 1.615731 | 6.554441 | 7.260823 | 0.000495 | 0.049738 | 0.568689 |
| lnc-QDPR-5:1      | -1.80443 | 4.5539   | -7.25197 | 0.000498 | 0.049948 | 0.562496 |
| NONHSAT201275.1   | 1.5321   | 1.968579 | 7.246577 | 0.0005   | 0.050088 | 0.558714 |
| NONHSAT201948.1   | 1.34936  | 4.669789 | 7.243518 | 0.000501 | 0.050113 | 0.556569 |
| MSTRG.27104.1     | -1.83783 | 2.357507 | -7.23481 | 0.000504 | 0.050113 | 0.550456 |
| NONHSAT154326.1   | -1.45044 | 1.857006 | -7.23203 | 0.000505 | 0.050113 | 0.548504 |
| lnc-SHARPIN-4:5   | -1.47229 | 3.333184 | -7.23138 | 0.000505 | 0.050113 | 0.54805  |
| lnc-KCNJ6-16:1    | -1.27225 | 5.051044 | -7.23037 | 0.000505 | 0.050113 | 0.547344 |
| lnc-RAP1B-6:1     | -1.22091 | 7.746886 | -7.22382 | 0.000508 | 0.05012  | 0.542734 |
| MSTRG.7871.1      | -1.03029 | 5.381579 | -7.22351 | 0.000508 | 0.05012  | 0.542521 |
| NONHSAT161585.1   | 1.211149 | 5.718715 | 7.223211 | 0.000508 | 0.05012  | 0.542308 |
| lnc-ARRDC3-10:1   | -1.04351 | 6.161979 | -7.21319 | 0.000512 | 0.050318 | 0.535253 |

|                   |          |          |          |          |          |          |
|-------------------|----------|----------|----------|----------|----------|----------|
| NONHSAT172454.1   | 1.731996 | 2.215067 | 7.212136 | 0.000512 | 0.050318 | 0.534512 |
| ENST00000550941.1 | 1.803268 | 4.364067 | 7.21061  | 0.000513 | 0.050318 | 0.533437 |
| lnc-SLC23A3-3:1   | -1.7374  | 2.300656 | -7.20929 | 0.000513 | 0.050318 | 0.532509 |
| ENST00000659614.1 | 1.199438 | 4.272205 | 7.204435 | 0.000515 | 0.050349 | 0.529083 |
| NONHSAT223229.1   | 1.020408 | 2.09906  | 7.201133 | 0.000516 | 0.050349 | 0.526754 |
| lnc-ARHGAP29-2:1  | -1.22314 | 4.543609 | -7.20072 | 0.000516 | 0.050349 | 0.526463 |
| NONHSAT208028.1   | 1.102651 | 1.627117 | 7.198928 | 0.000517 | 0.050349 | 0.525198 |
| lnc-VSTM5-3:1     | 1.11245  | 1.641631 | 7.19879  | 0.000517 | 0.050349 | 0.5251   |
| lnc-CLEC1B-1:2    | 1.617418 | 5.533193 | 7.189602 | 0.00052  | 0.050534 | 0.518611 |
| NONHSAT161255.1   | 1.742363 | 2.205395 | 7.189488 | 0.00052  | 0.050534 | 0.51853  |
| NONHSAT203155.1   | -1.07954 | 1.754892 | -7.1824  | 0.000523 | 0.050615 | 0.513518 |
| NONHSAT199763.1   | 1.550588 | 1.809601 | 7.181458 | 0.000523 | 0.050615 | 0.512851 |
| NONHSAT170235.1   | -1.32667 | 5.458908 | -7.18102 | 0.000523 | 0.050615 | 0.512542 |
| ENST00000642132.1 | 1.517942 | 1.92025  | 7.17947  | 0.000524 | 0.050615 | 0.511444 |
| NONHSAT169336.1   | -1.87047 | 2.037719 | -7.17727 | 0.000525 | 0.050624 | 0.509887 |
| NONHSAT185364.1   | 1.349739 | 5.065978 | 7.173379 | 0.000526 | 0.050624 | 0.50713  |
| MSTRG.29057.151   | 1.447151 | 4.894599 | 7.173114 | 0.000526 | 0.050624 | 0.506942 |
| MSTRG.23836.4     | -1.70272 | 3.771436 | -7.16927 | 0.000528 | 0.050624 | 0.504218 |
| MSTRG.56680.1     | -1.0652  | 2.280312 | -7.16318 | 0.00053  | 0.050624 | 0.499899 |
| lnc-ZNF680-15:1   | 1.122324 | 1.801769 | 7.162871 | 0.00053  | 0.050624 | 0.499679 |
| NONHSAT149538.1   | 1.803918 | 2.333956 | 7.161612 | 0.000531 | 0.050624 | 0.498785 |
| lnc-ADSL-2:1      | -2.12162 | 3.102262 | -7.16132 | 0.000531 | 0.050624 | 0.498579 |
| lnc-ADAM2-3:1     | 1.647422 | 3.629175 | 7.156015 | 0.000533 | 0.050734 | 0.494811 |
| NONHSAT183140.1   | 1.547742 | 4.194775 | 7.152905 | 0.000534 | 0.050744 | 0.492602 |
| ENST00000504175.2 | -1.14264 | 4.502033 | -7.15265 | 0.000534 | 0.050744 | 0.492418 |
| lnc-SUMF2-3:1     | 1.718712 | 2.285162 | 7.148477 | 0.000536 | 0.050847 | 0.489454 |
| NONHSAT205360.1   | 1.450955 | 3.287064 | 7.143346 | 0.000537 | 0.050946 | 0.485804 |
| NONHSAT202963.1   | 1.020389 | 6.758665 | 7.142225 | 0.000538 | 0.050946 | 0.485006 |
| NONHSAT150648.1   | -1.30235 | 2.610596 | -7.13744 | 0.00054  | 0.050946 | 0.481602 |
| ENST00000439451.1 | 1.491799 | 1.968585 | 7.132915 | 0.000541 | 0.051024 | 0.478375 |
| lnc-ZPBP-8:1      | -1.01463 | 4.04844  | -7.12894 | 0.000543 | 0.051024 | 0.475537 |
| MSTRG.8974.1      | 1.832343 | 2.246605 | 7.128451 | 0.000543 | 0.051024 | 0.475192 |
| NONHSAT194239.1   | 1.023004 | 11.59057 | 7.127765 | 0.000543 | 0.051024 | 0.474702 |
| lnc-FAM72D-3:2    | -1.01546 | 5.522374 | -7.11123 | 0.00055  | 0.05128  | 0.462894 |
| MSTRG.26626.1     | -1.15773 | 5.707534 | -7.1054  | 0.000552 | 0.051346 | 0.458721 |
| lnc-RTCA-2:1      | 1.982181 | 2.058289 | 7.101286 | 0.000554 | 0.051346 | 0.455778 |
| SAMMSON:10        | 1.583095 | 2.687663 | 7.100825 | 0.000554 | 0.051346 | 0.455448 |
| NONHSAT187555.1   | 2.226116 | 5.146787 | 7.096653 | 0.000556 | 0.051359 | 0.452459 |
| NONHSAT210239.1   | 1.30779  | 7.855635 | 7.096534 | 0.000556 | 0.051359 | 0.452374 |
| NONHSAT207192.1   | -1.84164 | 2.174392 | -7.08999 | 0.000558 | 0.051443 | 0.447679 |
| NONHSAT211691.1   | 1.101673 | 3.389232 | 7.08929  | 0.000559 | 0.051443 | 0.44718  |
| NONHSAT187835.1   | 1.334007 | 3.928747 | 7.089177 | 0.000559 | 0.051443 | 0.447099 |
| MSTRG.65701.1     | 1.136418 | 3.155322 | 7.077275 | 0.000563 | 0.051443 | 0.438552 |
| lnc-HMGCLL1-2:1   | 2.360118 | 3.557255 | 7.076678 | 0.000564 | 0.051443 | 0.438123 |
| lnc-CENPP-14:1    | -1.02115 | 6.011663 | -7.07258 | 0.000565 | 0.051443 | 0.435175 |
| NONHSAT197562.1   | 1.073761 | 4.656128 | 7.071674 | 0.000566 | 0.051443 | 0.434526 |
| NONHSAT211250.1   | 1.119946 | 4.196865 | 7.070099 | 0.000566 | 0.051443 | 0.433393 |
| NONHSAT150854.1   | 1.470812 | 2.022946 | 7.067693 | 0.000567 | 0.051443 | 0.431662 |

|                   |          |          |          |          |          |          |
|-------------------|----------|----------|----------|----------|----------|----------|
| NONHSAT214841.1   | 1.799253 | 2.653933 | 7.067543 | 0.000567 | 0.051443 | 0.431554 |
| lnc-LY86-4:2      | 1.328313 | 1.963401 | 7.067146 | 0.000568 | 0.051443 | 0.431268 |
| lnc-NXPE3-1:1     | 1.200954 | 5.677776 | 7.065316 | 0.000568 | 0.051443 | 0.429951 |
| MSTRG.26513.93    | 1.592246 | 4.637459 | 7.064847 | 0.000568 | 0.051443 | 0.429613 |
| T314099           | 1.266497 | 1.754677 | 7.063992 | 0.000569 | 0.051443 | 0.428998 |
| MSTRG.13154.1     | 1.421656 | 4.1987   | 7.063953 | 0.000569 | 0.051443 | 0.428969 |
| lnc-CAT-1:1       | -1.33807 | 4.099285 | -7.06301 | 0.000569 | 0.051443 | 0.428289 |
| NONHSAT205640.1   | -1.2556  | 2.392792 | -7.05577 | 0.000572 | 0.051599 | 0.423072 |
| NONHSAT214741.1   | -1.41061 | 1.8034   | -7.05338 | 0.000573 | 0.051599 | 0.421348 |
| T241186           | 1.064083 | 4.321655 | 7.051843 | 0.000574 | 0.05161  | 0.420241 |
| lnc-CTXND2-5:2    | 1.060625 | 4.4103   | 7.049264 | 0.000575 | 0.051642 | 0.418381 |
| NONHSAT221951.1   | 1.171468 | 7.799437 | 7.046223 | 0.000576 | 0.051642 | 0.416186 |
| NONHSAT177069.1   | 3.058342 | 3.417542 | 7.035219 | 0.000581 | 0.051642 | 0.408235 |
| NONHSAT206364.1   | -1.12512 | 4.576794 | -7.03437 | 0.000581 | 0.051642 | 0.40762  |
| NONHSAT175033.1   | -1.42561 | 4.341286 | -7.03349 | 0.000581 | 0.051642 | 0.406988 |
| lnc-PDIA4-3:1     | -1.41567 | 4.025307 | -7.03303 | 0.000582 | 0.051642 | 0.406648 |
| ENST00000660627.1 | -1.50489 | 4.285831 | -7.03184 | 0.000582 | 0.051642 | 0.405793 |
| lnc-WAC-1:1       | 1.042184 | 5.229757 | 7.031331 | 0.000582 | 0.051642 | 0.405422 |
| T309027           | 1.494964 | 5.875645 | 7.023858 | 0.000585 | 0.051642 | 0.400012 |
| lnc-DPYS-1:2      | 1.543598 | 3.548938 | 7.016216 | 0.000589 | 0.051642 | 0.394473 |
| lnc-ANXA2R-6:1    | 2.810563 | 5.217614 | 7.00847  | 0.000592 | 0.051642 | 0.388853 |
| NONHSAT180753.1   | 1.441274 | 6.108274 | 7.006811 | 0.000593 | 0.051642 | 0.387648 |
| lnc-ADGRD2-5:1    | -1.67319 | 2.504339 | -7.00448 | 0.000594 | 0.051642 | 0.385956 |
| lnc-DCDC1-4:1     | -1.0771  | 3.141013 | -7.00292 | 0.000594 | 0.051642 | 0.384821 |
| lnc-BST2-1:1      | -1.07614 | 6.769907 | -7.0023  | 0.000595 | 0.051642 | 0.38437  |
| MSTRG.66910.17    | -1.19331 | 6.128242 | -7.00118 | 0.000595 | 0.051642 | 0.383555 |
| ENST00000599498.2 | -1.79347 | 2.465943 | -7.00112 | 0.000595 | 0.051642 | 0.383516 |
| ENST00000548900.1 | -1.29169 | 1.876276 | -7.00057 | 0.000595 | 0.051642 | 0.383113 |
| lnc-E2F6-2:1      | -1.79551 | 3.88886  | -7.00001 | 0.000596 | 0.051642 | 0.382706 |
| lnc-PXDC1-12:2    | -1.47074 | 2.166642 | -6.99857 | 0.000596 | 0.051642 | 0.381658 |
| NONHSAT165093.1   | 1.044627 | 1.618701 | 6.998565 | 0.000596 | 0.051642 | 0.381657 |
| T152287           | -1.34681 | 4.976351 | -6.99739 | 0.000597 | 0.051642 | 0.380802 |
| ENST00000648410.1 | -1.85191 | 2.015273 | -6.99705 | 0.000597 | 0.051642 | 0.380554 |
| lnc-HSDL2-5:1     | -1.12279 | 3.887029 | -6.99587 | 0.000597 | 0.051642 | 0.379695 |
| NONHSAT177705.1   | -1.18329 | 1.65286  | -6.99553 | 0.000598 | 0.051642 | 0.379453 |
| lnc-COL6A5-3:1    | 1.214724 | 1.793432 | 6.993505 | 0.000598 | 0.051642 | 0.377976 |
| ENST00000540392.1 | -1.50501 | 2.142487 | -6.99266 | 0.000599 | 0.051642 | 0.377363 |
| MSTRG.57936.1     | 2.022027 | 2.041376 | 6.991817 | 0.000599 | 0.051642 | 0.376748 |
| lnc-RXYLT1-3:2    | -1.36973 | 3.273257 | -6.99145 | 0.000599 | 0.051642 | 0.376481 |
| T372787           | 1.332232 | 3.972329 | 6.990373 | 0.0006   | 0.051642 | 0.375697 |
| MSTRG.72001.13    | -1.09354 | 6.321996 | -6.98633 | 0.000602 | 0.051747 | 0.37275  |
| lnc-SCHIP1-2:1    | -1.21306 | 4.933657 | -6.97802 | 0.000605 | 0.051929 | 0.366697 |
| MSTRG.24168.1     | 1.275352 | 4.30627  | 6.976741 | 0.000606 | 0.051932 | 0.365763 |
| lnc-OR13J1-2:1    | -1.18106 | 4.916485 | -6.97329 | 0.000607 | 0.051974 | 0.363245 |
| ENST00000670874.1 | 1.362182 | 2.02073  | 6.970188 | 0.000609 | 0.051985 | 0.360981 |
| MSTRG.44086.1     | 1.683851 | 5.590312 | 6.968482 | 0.000609 | 0.051985 | 0.359735 |
| lnc-ZNF705D-5:1   | -1.09936 | 1.809489 | -6.96832 | 0.000609 | 0.051985 | 0.359619 |
| lnc-PTPRZ1-11:1   | 1.117664 | 4.767447 | 6.958654 | 0.000614 | 0.052174 | 0.352552 |

|                   |          |          |          |          |          |          |
|-------------------|----------|----------|----------|----------|----------|----------|
| NONHSAT219644.1   | 1.252183 | 4.365415 | 6.956795 | 0.000615 | 0.0522   | 0.351192 |
| MSTRG.64924.1     | 1.373961 | 5.906594 | 6.952483 | 0.000616 | 0.05225  | 0.348037 |
| lnc-TMEM161B-10:3 | -1.09857 | 5.078432 | -6.94753 | 0.000619 | 0.05225  | 0.344409 |
| lnc-TSPY4-8:1     | 1.743163 | 2.472831 | 6.947156 | 0.000619 | 0.05225  | 0.344135 |
| NONHSAT159699.1   | 1.890709 | 2.076876 | 6.945522 | 0.00062  | 0.05225  | 0.342938 |
| ENST00000609279.1 | -1.73994 | 2.241633 | -6.94394 | 0.00062  | 0.05225  | 0.341779 |
| ENST00000567428.2 | -1.18486 | 4.071682 | -6.93789 | 0.000623 | 0.052437 | 0.337339 |
| NONHSAT185502.1   | 2.626794 | 2.937134 | 6.935468 | 0.000624 | 0.052485 | 0.335564 |
| lnc-STK25-2:1     | 1.200153 | 8.609427 | 6.918368 | 0.000632 | 0.052878 | 0.322998 |
| NONHSAT218859.1   | 1.619928 | 2.174116 | 6.915813 | 0.000633 | 0.052889 | 0.321118 |
| NONHSAT178852.1   | 1.085482 | 7.374425 | 6.912626 | 0.000635 | 0.052968 | 0.318772 |
| NONHSAT193328.1   | -1.27363 | 1.723518 | -6.90972 | 0.000636 | 0.053015 | 0.316633 |
| NONHSAT199844.1   | 1.347431 | 3.909066 | 6.909149 | 0.000636 | 0.053015 | 0.31621  |
| NONHSAT206387.1   | 1.040113 | 5.550902 | 6.903096 | 0.000639 | 0.053119 | 0.311748 |
| lnc-CAMSAP2-5:1   | -1.2477  | 5.943498 | -6.89867 | 0.000641 | 0.053119 | 0.308481 |
| NR_026993         | -1.57829 | 3.966637 | -6.89779 | 0.000641 | 0.053119 | 0.307832 |
| lnc-NEIL3-1:1     | 2.170515 | 2.17812  | 6.895686 | 0.000642 | 0.053119 | 0.306281 |
| lnc-SLC25A10-4:1  | -1.54763 | 5.135234 | -6.89518 | 0.000643 | 0.053119 | 0.305907 |
| NONHSAT157966.1   | -1.68033 | 2.143169 | -6.89174 | 0.000644 | 0.053119 | 0.303364 |
| NONHSAT216241.1   | 1.026503 | 1.530808 | 6.891256 | 0.000645 | 0.053119 | 0.303009 |
| NONHSAT202591.1   | -1.4924  | 2.319229 | -6.89084 | 0.000645 | 0.053119 | 0.302701 |
| lnc-ID2-8:2       | 1.202195 | 1.692554 | 6.888704 | 0.000646 | 0.053119 | 0.301123 |
| MSTRG.27546.1     | -1.56257 | 2.456579 | -6.88153 | 0.000649 | 0.053119 | 0.295817 |
| ENST00000439027.1 | 1.080165 | 2.563786 | 6.881096 | 0.000649 | 0.053119 | 0.295497 |
| NONHSAT186733.1   | 2.338527 | 6.529731 | 6.879176 | 0.00065  | 0.053119 | 0.294077 |
| PCAT6:6           | 1.293404 | 5.673987 | 6.877179 | 0.000651 | 0.053119 | 0.292599 |
| lnc-RABEP1-5:1    | -1.55351 | 3.433793 | -6.87524 | 0.000652 | 0.053119 | 0.291164 |
| lnc-ATP12A-1:11   | 1.473952 | 2.216177 | 6.87452  | 0.000653 | 0.053119 | 0.290629 |
| NONHSAT212341.1   | 1.249762 | 4.419051 | 6.87358  | 0.000653 | 0.053119 | 0.289933 |
| lnc-ELF1-1:2      | -1.49002 | 3.403996 | -6.87173 | 0.000654 | 0.053119 | 0.288563 |
| NONHSAT187985.1   | -1.65379 | 2.141417 | -6.87165 | 0.000654 | 0.053119 | 0.288507 |
| NONHSAT214601.1   | 1.347195 | 4.909687 | 6.868894 | 0.000655 | 0.053119 | 0.286461 |
| NONHSAT168416.1   | 1.631643 | 3.871794 | 6.86838  | 0.000655 | 0.053119 | 0.28608  |
| T224283           | 2.038292 | 3.510036 | 6.866746 | 0.000656 | 0.053119 | 0.284869 |
| NR_024046         | -1.62609 | 5.239959 | -6.8649  | 0.000657 | 0.053119 | 0.283499 |
| NONHSAT191672.1   | -1.74832 | 2.784791 | -6.86477 | 0.000657 | 0.053119 | 0.283404 |
| ENST00000589715.1 | -1.12936 | 4.305044 | -6.86424 | 0.000657 | 0.053119 | 0.283007 |
| ENST00000581727.1 | -2.10627 | 2.342375 | -6.86313 | 0.000658 | 0.053119 | 0.282187 |
| MSTRG.21378.2     | 1.831572 | 2.511794 | 6.849191 | 0.000665 | 0.053261 | 0.271835 |
| lnc-PFKP-27:3     | 1.029301 | 4.525896 | 6.848519 | 0.000665 | 0.053261 | 0.271336 |
| lnc-CDH2-3:1      | -1.069   | 3.337885 | -6.84755 | 0.000666 | 0.053261 | 0.270613 |
| MSTRG.56046.1     | 1.339078 | 3.244771 | 6.845681 | 0.000666 | 0.053261 | 0.269225 |
| MSTRG.60557.86    | -1.53627 | 2.170868 | -6.84431 | 0.000667 | 0.053261 | 0.268204 |
| MSTRG.50714.19    | -1.46149 | 4.950789 | -6.83816 | 0.00067  | 0.053391 | 0.263627 |
| NONHSAT223747.1   | 2.972548 | 3.089457 | 6.837525 | 0.00067  | 0.053391 | 0.263155 |
| MSTRG.6137.1      | -1.09164 | 4.123294 | -6.835   | 0.000672 | 0.053391 | 0.261274 |
| lnc-CRACR2A-5:2   | -1.80671 | 2.188557 | -6.83412 | 0.000672 | 0.053391 | 0.260622 |
| ENST00000485055.5 | 1.033467 | 4.30421  | 6.82902  | 0.000675 | 0.053391 | 0.256817 |

|                   |          |          |          |          |          |          |
|-------------------|----------|----------|----------|----------|----------|----------|
| T122536           | 2.045203 | 2.103255 | 6.824778 | 0.000677 | 0.053391 | 0.253653 |
| MSTRG.4524.4      | -2.32347 | 2.726766 | -6.8245  | 0.000677 | 0.053391 | 0.253444 |
| NONHSAT206884.1   | -1.31803 | 4.686512 | -6.8229  | 0.000678 | 0.053391 | 0.252255 |
| NONHSAT178438.1   | 2.654847 | 2.514367 | 6.821658 | 0.000678 | 0.053391 | 0.251325 |
| NR_039984         | 1.023797 | 5.097057 | 6.821049 | 0.000679 | 0.053391 | 0.25087  |
| MSTRG.39603.1     | 1.039758 | 4.131819 | 6.817637 | 0.00068  | 0.053471 | 0.248322 |
| NONHSAT187660.1   | -1.14464 | 3.499269 | -6.81587 | 0.000681 | 0.053474 | 0.247005 |
| MSTRG.20397.1     | 1.582748 | 1.849157 | 6.813311 | 0.000683 | 0.053474 | 0.24509  |
| MSTRG.65759.1     | 1.843455 | 2.183886 | 6.810475 | 0.000684 | 0.053474 | 0.24297  |
| NONHSAT187940.1   | 1.254438 | 4.045906 | 6.808359 | 0.000685 | 0.053474 | 0.241388 |
| ENST00000655803.1 | -1.15335 | 4.444149 | -6.80818 | 0.000685 | 0.053474 | 0.241253 |
| lnc-YEATS4-3:1    | -1.19871 | 4.276811 | -6.80789 | 0.000685 | 0.053474 | 0.241036 |
| lnc-NEFL-1:2      | 1.506613 | 5.270155 | 6.805573 | 0.000686 | 0.053474 | 0.239304 |
| lnc-TXNDC5-5:1    | 1.275044 | 11.53744 | 6.804924 | 0.000687 | 0.053474 | 0.238817 |
| NONHSAT199064.1   | 1.219181 | 4.834977 | 6.803797 | 0.000687 | 0.053474 | 0.237974 |
| MSTRG.67360.12    | -1.27232 | 2.091389 | -6.80287 | 0.000688 | 0.053474 | 0.237278 |
| T255263           | -1.33894 | 4.562679 | -6.80135 | 0.000689 | 0.05348  | 0.236146 |
| lnc-PEPD-7:1      | 1.408847 | 1.792607 | 6.791825 | 0.000693 | 0.053548 | 0.229005 |
| lnc-ODC1-2:4      | -1.52097 | 5.900565 | -6.79067 | 0.000694 | 0.053548 | 0.228143 |
| MSTRG.15382.1     | 1.663488 | 5.064365 | 6.788078 | 0.000695 | 0.053548 | 0.226195 |
| NONHSAT176879.1   | 1.429067 | 3.604117 | 6.786452 | 0.000696 | 0.053548 | 0.224976 |
| MSTRG.33740.1     | 1.057464 | 4.125353 | 6.785453 | 0.000697 | 0.053548 | 0.224226 |
| NONHSAT187158.1   | 1.005181 | 1.97843  | 6.784223 | 0.000697 | 0.053556 | 0.223302 |
| T321579           | 1.126943 | 5.19967  | 6.783053 | 0.000698 | 0.053562 | 0.222424 |
| NONHSAT178902.1   | 1.400589 | 1.906829 | 6.780269 | 0.000699 | 0.053568 | 0.220334 |
| MSTRG.60769.1     | -1.38743 | 5.216621 | -6.77983 | 0.0007   | 0.053568 | 0.220005 |
| MSTRG.37312.1     | 1.242239 | 5.366247 | 6.777123 | 0.000701 | 0.05363  | 0.21797  |
| MSTRG.32785.1     | -1.7319  | 2.255614 | -6.77236 | 0.000704 | 0.05363  | 0.214392 |
| lnc-KIF18A-9:1    | -1.01593 | 5.352756 | -6.77158 | 0.000704 | 0.05363  | 0.213801 |
| ENST00000616950.1 | 1.437676 | 6.320191 | 6.768094 | 0.000706 | 0.05363  | 0.21118  |
| lnc-DCBLD1-2:1    | -1.32838 | 4.441224 | -6.76713 | 0.000706 | 0.05363  | 0.210459 |
| lnc-PTCHD4-2:1    | -1.12385 | 7.01468  | -6.76616 | 0.000707 | 0.05363  | 0.209724 |
| NONHSAT153767.1   | -1.24384 | 4.559856 | -6.7644  | 0.000708 | 0.05363  | 0.208401 |
| MSTRG.52731.1     | -1.93356 | 2.298429 | -6.76403 | 0.000708 | 0.05363  | 0.208121 |
| NONHSAT178466.1   | -1.6313  | 2.044676 | -6.75975 | 0.00071  | 0.05363  | 0.204901 |
| MSTRG.63640.1     | 1.062664 | 3.693942 | 6.757169 | 0.000712 | 0.05363  | 0.202953 |
| NONHSAT158334.1   | -1.66718 | 4.652809 | -6.75644 | 0.000712 | 0.05363  | 0.2024   |
| MSTRG.2660.1      | -1.61732 | 5.30469  | -6.75624 | 0.000712 | 0.05363  | 0.202256 |
| ENST00000541885.1 | 2.720091 | 3.105184 | 6.755937 | 0.000712 | 0.05363  | 0.202024 |
| NONHSAT200732.1   | 2.142039 | 2.224481 | 6.753963 | 0.000713 | 0.05363  | 0.200536 |
| NONHSAT152765.1   | 1.492773 | 3.021596 | 6.753482 | 0.000713 | 0.05363  | 0.200174 |
| lnc-PRR4-1:13     | -1.06064 | 5.483623 | -6.75    | 0.000715 | 0.05363  | 0.197545 |
| lnc-VEZF1-1:7     | -1.0402  | 5.328271 | -6.74948 | 0.000716 | 0.05363  | 0.197151 |
| MSTRG.25435.1     | -1.25445 | 3.593991 | -6.74875 | 0.000716 | 0.05363  | 0.1966   |
| NONHSAT210404.1   | 1.184477 | 3.167359 | 6.747944 | 0.000716 | 0.05363  | 0.195995 |
| NONHSAT166826.1   | 1.937662 | 3.564869 | 6.743344 | 0.000719 | 0.053664 | 0.192522 |
| NONHSAT149286.1   | 1.419922 | 3.147758 | 6.742697 | 0.000719 | 0.053664 | 0.192034 |
| NONHSAT213782.1   | 1.415373 | 1.797475 | 6.741259 | 0.00072  | 0.053664 | 0.190947 |

|                   |          |          |          |          |          |          |
|-------------------|----------|----------|----------|----------|----------|----------|
| NONHSAT217845.1   | 1.321509 | 1.691077 | 6.737889 | 0.000722 | 0.053683 | 0.1884   |
| lnc-ZNF131-11:1   | -1.1909  | 3.190999 | -6.73768 | 0.000722 | 0.053683 | 0.188242 |
| lnc-EMCN-2:1      | -1.97284 | 5.245069 | -6.73382 | 0.000724 | 0.053714 | 0.185321 |
| NONHSAT158061.1   | -1.43253 | 2.334148 | -6.73303 | 0.000724 | 0.053714 | 0.184728 |
| ENST00000668181.1 | 1.243656 | 4.843622 | 6.732715 | 0.000725 | 0.053714 | 0.184488 |
| NONHSAT208810.1   | 1.684524 | 1.887201 | 6.7325   | 0.000725 | 0.053714 | 0.184325 |
| lnc-VKORC1L1-2:1  | -1.14961 | 3.356565 | -6.72675 | 0.000728 | 0.053883 | 0.179977 |
| lnc-SLITRK6-28:2  | 1.034359 | 4.131783 | 6.716209 | 0.000734 | 0.054016 | 0.171987 |
| lnc-FCN1-5:1      | 1.922771 | 2.287586 | 6.71456  | 0.000734 | 0.054016 | 0.170736 |
| lnc-APOD-6:1      | -1.02005 | 8.523607 | -6.71445 | 0.000735 | 0.054016 | 0.17065  |
| lnc-ID3-4:1       | 1.159228 | 3.348641 | 6.713447 | 0.000735 | 0.054016 | 0.169892 |
| T182488           | -1.45713 | 2.004525 | -6.71327 | 0.000735 | 0.054016 | 0.169756 |
| ENST00000502437.1 | 1.188387 | 4.478531 | 6.712319 | 0.000736 | 0.054016 | 0.169036 |
| NONHSAT217478.1   | 2.095274 | 2.334527 | 6.710031 | 0.000737 | 0.054016 | 0.1673   |
| lnc-TNFSF15-3:1   | 1.555714 | 3.116672 | 6.709801 | 0.000737 | 0.054016 | 0.167125 |
| lnc-KHNYN-8:1     | 1.037217 | 5.080677 | 6.707337 | 0.000738 | 0.054016 | 0.165254 |
| lnc-TAF5L-4:2     | -1.42622 | 3.324013 | -6.70684 | 0.000739 | 0.054016 | 0.164879 |
| NONHSAT187820.1   | -1.33091 | 4.834157 | -6.70192 | 0.000741 | 0.054109 | 0.161141 |
| ENST00000439455.1 | -1.77219 | 3.670341 | -6.70164 | 0.000742 | 0.054109 | 0.160924 |
| NONHSAT164347.1   | 1.020988 | 5.489494 | 6.697232 | 0.000744 | 0.054137 | 0.157575 |
| MSTRG.8860.2      | 2.761215 | 3.598722 | 6.690873 | 0.000748 | 0.054181 | 0.152737 |
| NONHSAT160345.1   | 1.073876 | 5.022499 | 6.686816 | 0.00075  | 0.054202 | 0.149648 |
| MSTRG.51939.1     | -1.08095 | 1.635286 | -6.68507 | 0.000751 | 0.054202 | 0.14832  |
| lnc-PTGS2-10:1    | 1.351725 | 1.73675  | 6.684868 | 0.000751 | 0.054202 | 0.148164 |
| MSTRG.29862.1     | -1.03826 | 6.216453 | -6.68278 | 0.000752 | 0.054202 | 0.146574 |
| NONHSAT171285.1   | 1.60055  | 6.924888 | 6.681851 | 0.000753 | 0.054202 | 0.145865 |
| lnc-ANKRD29-2:1   | 1.011144 | 9.367901 | 6.681713 | 0.000753 | 0.054202 | 0.145759 |
| MSTRG.50049.1     | 1.264967 | 4.548924 | 6.680526 | 0.000753 | 0.054202 | 0.144854 |
| MSTRG.59826.1     | -1.03837 | 6.194511 | -6.68017 | 0.000754 | 0.054202 | 0.144582 |
| NONHSAT164446.1   | 1.400385 | 1.877418 | 6.677829 | 0.000755 | 0.054259 | 0.142798 |
| NONHSAT170161.1   | -1.09004 | 4.734948 | -6.6763  | 0.000756 | 0.054282 | 0.141635 |
| T187936           | 1.100863 | 2.073741 | 6.672022 | 0.000758 | 0.054418 | 0.138367 |
| ENST00000453716.1 | 1.040063 | 4.678935 | 6.66617  | 0.000762 | 0.05458  | 0.133898 |
| lnc-ARHGAP6-2:1   | -1.1332  | 4.154684 | -6.66505 | 0.000762 | 0.054587 | 0.133045 |
| lnc-MYLK4-12:1    | 1.22348  | 4.559123 | 6.661482 | 0.000764 | 0.054656 | 0.130315 |
| lnc-ICE2-2:2      | -1.16102 | 5.822646 | -6.65638 | 0.000767 | 0.054668 | 0.126412 |
| NONHSAT156588.1   | 1.166174 | 4.285892 | 6.655859 | 0.000768 | 0.054668 | 0.126013 |
| NONHSAT183144.1   | 1.407131 | 4.454012 | 6.655551 | 0.000768 | 0.054668 | 0.125778 |
| lnc-FUCA2-2:1     | -1.4419  | 2.178256 | -6.65446 | 0.000768 | 0.054674 | 0.124946 |
| NONHSAT178936.1   | -1.31848 | 1.933587 | -6.65102 | 0.00077  | 0.054698 | 0.122311 |
| lnc-SCTR-2:4      | -1.47342 | 3.151907 | -6.65097 | 0.00077  | 0.054698 | 0.122274 |
| ENST00000587696.2 | -1.38771 | 2.348364 | -6.65013 | 0.000771 | 0.054698 | 0.12163  |
| NONHSAT186416.1   | 1.279632 | 5.149463 | 6.640496 | 0.000776 | 0.054781 | 0.114244 |
| NONHSAT201926.1   | 1.896664 | 2.030651 | 6.637515 | 0.000778 | 0.054781 | 0.111957 |
| NONHSAT167559.1   | -1.22561 | 4.48152  | -6.63412 | 0.00078  | 0.054781 | 0.109355 |
| NONHSAT155778.1   | 1.010395 | 4.077935 | 6.633494 | 0.000781 | 0.054781 | 0.10887  |
| NONHSAT197985.1   | 1.724139 | 7.755332 | 6.632606 | 0.000781 | 0.054781 | 0.108189 |
| NONHSAT214222.1   | 1.313778 | 1.685011 | 6.631059 | 0.000782 | 0.054781 | 0.107001 |

|                   |          |          |          |          |          |          |
|-------------------|----------|----------|----------|----------|----------|----------|
| lnc-C6orf201-9:1  | 1.533055 | 6.159334 | 6.62874  | 0.000783 | 0.054781 | 0.10522  |
| NONHSAT198109.1   | -1.0069  | 4.406604 | -6.62491 | 0.000786 | 0.054781 | 0.102272 |
| MSTRG.7840.3      | -1.39148 | 4.467517 | -6.62491 | 0.000786 | 0.054781 | 0.102272 |
| ENST00000663697.1 | 1.449022 | 3.72187  | 6.624361 | 0.000786 | 0.054781 | 0.101853 |
| ENST00000666655.1 | 1.94387  | 2.064459 | 6.623268 | 0.000787 | 0.054781 | 0.101013 |
| ENST00000449581.1 | 2.04857  | 2.546601 | 6.621814 | 0.000787 | 0.054781 | 0.099895 |
| NFIA-AS1:12       | -1.62925 | 5.001628 | -6.62154 | 0.000788 | 0.054781 | 0.099683 |
| lnc-EFCAB6-1:1    | 1.136132 | 4.286808 | 6.620026 | 0.000789 | 0.054781 | 0.09852  |
| T227254           | 1.954002 | 2.036085 | 6.618819 | 0.000789 | 0.054781 | 0.097591 |
| lnc-KLHL18-6:1    | -1.00183 | 5.210678 | -6.61879 | 0.000789 | 0.054781 | 0.09757  |
| lnc-SLC46A3-3:1   | -1.35028 | 2.033441 | -6.6186  | 0.000789 | 0.054781 | 0.097423 |
| NONHSAT181808.1   | 1.15926  | 4.66767  | 6.613968 | 0.000792 | 0.054781 | 0.093857 |
| ENST00000549291.1 | 1.970693 | 2.093355 | 6.611052 | 0.000794 | 0.054781 | 0.091611 |
| NONHSAT176767.1   | 2.294787 | 2.248682 | 6.610294 | 0.000794 | 0.054781 | 0.091027 |
| NONHSAT177961.1   | 1.268219 | 1.666374 | 6.609095 | 0.000795 | 0.054781 | 0.090103 |
| NONHSAT170875.1   | -2.07548 | 2.440088 | -6.60773 | 0.000796 | 0.054781 | 0.089054 |
| lnc-SLCO4C1-5:1   | -2.09151 | 3.220852 | -6.60605 | 0.000797 | 0.054781 | 0.087759 |
| NONHSAT217968.1   | 1.07247  | 1.631832 | 6.605827 | 0.000797 | 0.054781 | 0.087584 |
| lnc-CD226-3:4     | -1.00056 | 6.141834 | -6.60567 | 0.000797 | 0.054781 | 0.087464 |
| T342810           | 1.717045 | 5.146039 | 6.604995 | 0.000798 | 0.054781 | 0.086942 |
| ENST00000522005.1 | -1.23948 | 2.224534 | -6.60378 | 0.000798 | 0.054781 | 0.086003 |
| ENST00000518552.2 | -1.82494 | 3.889278 | -6.59872 | 0.000801 | 0.054781 | 0.0821   |
| NONHSAT179061.1   | 1.502757 | 5.871137 | 6.598693 | 0.000801 | 0.054781 | 0.082081 |
| NONHSAT186698.1   | 1.417368 | 3.186919 | 6.597253 | 0.000802 | 0.054781 | 0.08097  |
| NONHSAT166052.1   | 1.508534 | 2.348859 | 6.596571 | 0.000803 | 0.054781 | 0.080443 |
| NONHSAT170083.1   | 1.284733 | 1.860433 | 6.595968 | 0.000803 | 0.054781 | 0.079977 |
| ENST00000585189.1 | 1.182092 | 3.913011 | 6.59457  | 0.000804 | 0.054781 | 0.078898 |
| LINC00602:3       | 1.116326 | 4.799168 | 6.593625 | 0.000804 | 0.054781 | 0.078168 |
| NONHSAT158864.1   | -1.13289 | 5.185595 | -6.59156 | 0.000806 | 0.054781 | 0.076575 |
| T116318           | 1.306986 | 1.976864 | 6.590239 | 0.000807 | 0.054781 | 0.075552 |
| lnc-HS3ST5-2:5    | 1.786382 | 1.945877 | 6.589659 | 0.000807 | 0.054781 | 0.075104 |
| NONHSAT197190.1   | 1.084815 | 5.437569 | 6.589322 | 0.000807 | 0.054781 | 0.074843 |
| NONHSAT201928.1   | -1.00002 | 1.60723  | -6.58907 | 0.000807 | 0.054781 | 0.074648 |
| ENST00000510433.1 | 2.722143 | 2.409348 | 6.588894 | 0.000807 | 0.054781 | 0.074512 |
| MSTRG.48273.2     | 1.004731 | 4.927729 | 6.585367 | 0.00081  | 0.054782 | 0.071785 |
| lnc-SDHAF4-4:1    | -1.34866 | 4.045462 | -6.58334 | 0.000811 | 0.05483  | 0.07022  |
| lnc-BCL7A-3:1     | 1.963602 | 5.463733 | 6.58235  | 0.000811 | 0.054834 | 0.069452 |
| NONHSAT216230.1   | -1.63806 | 4.067893 | -6.57818 | 0.000814 | 0.054852 | 0.066221 |
| ENST00000655714.1 | -1.09623 | 5.988291 | -6.57769 | 0.000814 | 0.054852 | 0.065843 |
| lnc-ACTR3B-4:1    | -1.03772 | 4.775828 | -6.57752 | 0.000814 | 0.054852 | 0.065711 |
| NONHSAT174436.1   | 2.541795 | 2.713744 | 6.576236 | 0.000815 | 0.054869 | 0.064718 |
| lnc-DAP-12:1      | 1.160958 | 1.662326 | 6.573571 | 0.000817 | 0.054915 | 0.062655 |
| NONHSAT186809.1   | -1.12224 | 4.375531 | -6.57338 | 0.000817 | 0.054915 | 0.062509 |
| T015742           | 1.350924 | 5.633918 | 6.568315 | 0.00082  | 0.055018 | 0.058581 |
| lnc-ZNF669-1:1    | 1.890266 | 2.038316 | 6.566239 | 0.000821 | 0.055036 | 0.056971 |
| lnc-SYPL1-2:1     | -1.26738 | 4.962142 | -6.56101 | 0.000825 | 0.055093 | 0.05291  |
| ENST00000616097.1 | -1.20819 | 3.935909 | -6.55451 | 0.000829 | 0.055093 | 0.047866 |
| lnc-NAALADL2-12:1 | -1.15482 | 5.594147 | -6.55423 | 0.000829 | 0.055093 | 0.04765  |



|                   |          |          |          |          |          |          |
|-------------------|----------|----------|----------|----------|----------|----------|
| ENST00000554540.1 | 1.136283 | 4.396126 | 6.553906 | 0.000829 | 0.055093 | 0.047397 |
| NONHSAT175396.1   | 1.014796 | 5.77309  | 6.551951 | 0.00083  | 0.055093 | 0.045877 |
| NONHSAT186860.1   | -1.68788 | 2.005136 | -6.55088 | 0.000831 | 0.055093 | 0.045046 |
| lnc-UNC5D-5:1     | 1.22737  | 4.951275 | 6.548549 | 0.000833 | 0.055093 | 0.043232 |
| NONHSAT224335.1   | 1.867507 | 5.109776 | 6.546679 | 0.000834 | 0.055093 | 0.041778 |
| NONHSAT205368.1   | -1.03795 | 1.850343 | -6.54542 | 0.000835 | 0.055093 | 0.040799 |
| lnc-MKKS-8:1      | -1.76475 | 2.725993 | -6.54352 | 0.000836 | 0.055093 | 0.039322 |
| NONHSAT197527.1   | -1.52089 | 2.107934 | -6.54339 | 0.000836 | 0.055093 | 0.039219 |
| NONHSAT158009.1   | 1.479369 | 3.413146 | 6.542047 | 0.000837 | 0.055093 | 0.038174 |
| lnc-C14orf180-3:1 | 1.274113 | 4.106366 | 6.538934 | 0.000839 | 0.055093 | 0.03575  |
| ENST00000546770.1 | 2.148021 | 4.681394 | 6.536321 | 0.00084  | 0.055093 | 0.033714 |
| lnc-TAS2R1-12:1   | -2.02725 | 2.928057 | -6.5362  | 0.00084  | 0.055093 | 0.03362  |
| MSTRG.22622.1     | 1.00426  | 4.743102 | 6.535931 | 0.000841 | 0.055093 | 0.03341  |
| MSTRG.55402.1     | -2.61831 | 3.663217 | -6.53495 | 0.000841 | 0.055093 | 0.032646 |
| LINC01697:42      | 1.195023 | 5.256212 | 6.534576 | 0.000841 | 0.055093 | 0.032354 |
| NONHSAT187230.1   | 1.86299  | 2.031271 | 6.530604 | 0.000844 | 0.055093 | 0.029258 |
| ENST00000527318.1 | 1.947587 | 4.577145 | 6.529837 | 0.000844 | 0.055093 | 0.02866  |
| NONHSAT220581.1   | 1.718687 | 2.13276  | 6.529004 | 0.000845 | 0.055093 | 0.028011 |
| MSTRG.35419.1     | 1.655683 | 4.297546 | 6.527392 | 0.000846 | 0.055093 | 0.026753 |
| NONHSAT149210.1   | 1.072004 | 2.381219 | 6.52446  | 0.000848 | 0.055093 | 0.024465 |
| LINC01762:27      | 1.358077 | 4.282526 | 6.524134 | 0.000848 | 0.055093 | 0.024211 |
| ENST00000583687.1 | 1.135848 | 1.876673 | 6.523451 | 0.000849 | 0.055093 | 0.023677 |
| NONHSAT188541.1   | 2.786956 | 3.069121 | 6.520712 | 0.00085  | 0.055093 | 0.021539 |
| lnc-C15orf41-2:4  | 1.248226 | 1.9097   | 6.517378 | 0.000853 | 0.055093 | 0.018935 |
| lnc-BAIAP2-3:1    | -1.10159 | 4.336739 | -6.51708 | 0.000853 | 0.055093 | 0.018703 |
| lnc-BECN2-2:2     | 1.43737  | 4.444632 | 6.514619 | 0.000854 | 0.055093 | 0.016778 |
| ENST00000619354.1 | 1.08872  | 5.890739 | 6.513838 | 0.000855 | 0.055093 | 0.016168 |
| lnc-SAMD12-4:1    | -1.05744 | 6.705736 | -6.51347 | 0.000855 | 0.055093 | 0.015883 |
| ENST00000668509.1 | 1.835316 | 2.374709 | 6.512692 | 0.000856 | 0.055093 | 0.015272 |
| NONHSAT221485.1   | 1.05201  | 7.911935 | 6.502238 | 0.000863 | 0.055438 | 0.007092 |
| NONHSAT211123.1   | -1.04845 | 1.608344 | -6.50205 | 0.000863 | 0.055438 | 0.006946 |
| MSTRG.49273.1     | 1.370734 | 1.774377 | 6.497471 | 0.000866 | 0.0555   | 0.003357 |
| ENST00000503307.2 | 1.180848 | 3.448053 | 6.497267 | 0.000866 | 0.0555   | 0.003198 |
| MSTRG.32943.1     | -1.13688 | 5.184215 | -6.4957  | 0.000867 | 0.05551  | 0.001972 |
| NONHSAT169246.1   | 1.094579 | 1.922344 | 6.494159 | 0.000868 | 0.05551  | 0.000762 |
| lnc-SLC2A12-11:1  | -1.13985 | 3.061055 | -6.49371 | 0.000868 | 0.05551  | 0.000413 |
| ENST00000608730.1 | -1.10676 | 1.806507 | -6.49233 | 0.000869 | 0.055528 | -0.00067 |
| NONHSAT173571.1   | 1.16816  | 1.931094 | 6.49165  | 0.00087  | 0.055528 | -0.00121 |
| ENST00000666788.1 | 1.364138 | 4.028486 | 6.484436 | 0.000874 | 0.055655 | -0.00687 |
| NONHSAT193652.1   | -1.36546 | 1.944949 | -6.48296 | 0.000875 | 0.055655 | -0.00802 |
| lnc-MORC2-3:2     | -1.94975 | 2.770005 | -6.48291 | 0.000875 | 0.055655 | -0.00807 |
| NONHSAT189915.1   | 1.597591 | 4.004613 | 6.48195  | 0.000876 | 0.055661 | -0.00882 |
| ENST00000505389.1 | 1.06234  | 5.53447  | 6.480528 | 0.000877 | 0.055687 | -0.00994 |
| lnc-SPATA31A7-8:1 | 1.211714 | 5.157779 | 6.474863 | 0.000881 | 0.055826 | -0.01439 |
| lnc-FAM50B-4:2    | 2.362646 | 2.606462 | 6.474253 | 0.000881 | 0.055826 | -0.01487 |
| NONHSAT174480.1   | 1.149344 | 3.798772 | 6.472127 | 0.000883 | 0.055846 | -0.01654 |
| lnc-STX11-5:1     | -1.14748 | 6.401408 | -6.46677 | 0.000886 | 0.055946 | -0.02076 |
| lnc-NYAP2-7:1     | 2.866942 | 3.063267 | 6.466346 | 0.000887 | 0.055946 | -0.02109 |

|                   |          |          |          |          |          |          |
|-------------------|----------|----------|----------|----------|----------|----------|
| NONHSAT182983.1   | 1.526923 | 2.225626 | 6.459394 | 0.000891 | 0.056176 | -0.02657 |
| NONHSAT197714.1   | 1.910523 | 3.762886 | 6.456401 | 0.000893 | 0.05624  | -0.02893 |
| lnc-ZNF621-1:4    | 1.442918 | 5.498228 | 6.455526 | 0.000894 | 0.05624  | -0.02962 |
| lnc-RNF212-1:3    | 1.43705  | 1.992134 | 6.45449  | 0.000895 | 0.05624  | -0.03043 |
| T314711           | 1.997123 | 2.69066  | 6.452631 | 0.000896 | 0.05624  | -0.0319  |
| T047559           | 2.152873 | 2.146694 | 6.451893 | 0.000897 | 0.05624  | -0.03248 |
| MSTRG.47530.1     | 1.153599 | 4.540557 | 6.450892 | 0.000897 | 0.05624  | -0.03327 |
| MSTRG.60219.1     | 1.404361 | 4.693838 | 6.450645 | 0.000897 | 0.05624  | -0.03347 |
| NONHSAT214360.1   | -1.24802 | 1.772018 | -6.44868 | 0.000899 | 0.056255 | -0.03502 |
| NONHSAT164281.1   | 1.070408 | 4.097036 | 6.443928 | 0.000902 | 0.056369 | -0.03877 |
| lnc-HOXC13-1:2    | -2.14629 | 2.409805 | -6.44364 | 0.000902 | 0.056369 | -0.039   |
| NONHSAT198401.1   | -2.14645 | 2.319862 | -6.44132 | 0.000904 | 0.056399 | -0.04083 |
| NONHSAT158984.1   | 1.394533 | 3.632592 | 6.441312 | 0.000904 | 0.056399 | -0.04084 |
| ENST00000506902.1 | 2.09783  | 2.456047 | 6.427525 | 0.000914 | 0.056549 | -0.05175 |
| lnc-FAM172A-3:4   | -1.83634 | 3.928542 | -6.42141 | 0.000918 | 0.056549 | -0.0566  |
| MSTRG.45444.1     | -1.64941 | 3.045636 | -6.41802 | 0.00092  | 0.056549 | -0.05928 |
| NONHSAT193396.1   | 1.17561  | 3.803309 | 6.417664 | 0.000921 | 0.056549 | -0.05956 |
| lnc-NENF-4:2      | -1.12908 | 2.430596 | -6.41524 | 0.000922 | 0.056549 | -0.06149 |
| lnc-OCIAD2-5:1    | -1.17571 | 1.752612 | -6.41486 | 0.000923 | 0.056549 | -0.06178 |
| ENST00000659392.1 | 1.693528 | 2.337192 | 6.414111 | 0.000923 | 0.056549 | -0.06238 |
| NONHSAT210605.1   | 1.726924 | 4.070195 | 6.412541 | 0.000924 | 0.056549 | -0.06363 |
| NONHSAT196990.1   | 1.319005 | 1.806448 | 6.41227  | 0.000924 | 0.056549 | -0.06384 |
| NONHSAT201449.1   | 1.43797  | 5.431103 | 6.410267 | 0.000926 | 0.056549 | -0.06543 |
| NONHSAT204524.1   | 1.433    | 3.874452 | 6.406613 | 0.000929 | 0.056549 | -0.06834 |
| T120764           | 1.006853 | 3.271918 | 6.406238 | 0.000929 | 0.056549 | -0.06863 |
| lnc-APPBP2-2:1    | -1.14551 | 4.723553 | -6.40562 | 0.000929 | 0.056549 | -0.06913 |
| NONHSAT210357.1   | 1.828999 | 4.324494 | 6.405167 | 0.00093  | 0.056549 | -0.06948 |
| T171443           | -1.60813 | 3.424917 | -6.40062 | 0.000933 | 0.056664 | -0.0731  |
| NONHSAT172139.1   | 1.314058 | 4.488959 | 6.397069 | 0.000935 | 0.056721 | -0.07592 |
| ENST00000530479.1 | 1.074681 | 6.848581 | 6.393094 | 0.000938 | 0.056721 | -0.07909 |
| lnc-HMGN3-6:1     | -1.07345 | 4.483235 | -6.39229 | 0.000939 | 0.056721 | -0.07973 |
| ENST00000617191.1 | 1.041133 | 7.538551 | 6.390579 | 0.00094  | 0.056721 | -0.08109 |
| NONHSAT158174.1   | -1.62535 | 4.473712 | -6.39038 | 0.00094  | 0.056721 | -0.08125 |
| ENST00000668682.1 | 1.650171 | 2.542094 | 6.389289 | 0.000941 | 0.056721 | -0.08212 |
| lnc-HSPB9-1:1     | -1.31438 | 1.821951 | -6.38827 | 0.000942 | 0.056721 | -0.08293 |
| ENST00000552426.1 | 1.230536 | 4.214097 | 6.387467 | 0.000942 | 0.056721 | -0.08357 |
| NONHSAT158239.1   | -1.43725 | 6.25609  | -6.3864  | 0.000943 | 0.056721 | -0.08442 |
| NONHSAT219249.1   | -1.83049 | 2.275667 | -6.38564 | 0.000944 | 0.056721 | -0.08502 |
| MSTRG.66691.10    | -2.27595 | 2.345974 | -6.38394 | 0.000945 | 0.056721 | -0.08638 |
| ENST00000655747.1 | -1.93848 | 2.50912  | -6.38041 | 0.000948 | 0.056721 | -0.08919 |
| lnc-KLF12-4:1     | -1.01717 | 6.323981 | -6.37993 | 0.000948 | 0.056721 | -0.08958 |
| lnc-SELENOF-11:1  | 1.822538 | 1.957716 | 6.376265 | 0.000951 | 0.056755 | -0.0925  |
| NONHSAT218976.1   | 1.585892 | 4.078422 | 6.375147 | 0.000952 | 0.056771 | -0.09339 |
| NONHSAT157886.1   | 2.252661 | 2.552681 | 6.371961 | 0.000954 | 0.056811 | -0.09594 |
| NR_026938         | -1.57805 | 4.492885 | -6.36799 | 0.000957 | 0.056853 | -0.09911 |
| lnc-FH-4:1        | -1.07264 | 2.110702 | -6.36353 | 0.00096  | 0.056883 | -0.10267 |
| ENST00000594688.1 | 1.460286 | 2.603767 | 6.36224  | 0.000961 | 0.056895 | -0.10371 |
| ENST00000602530.1 | 1.52533  | 4.390674 | 6.36129  | 0.000962 | 0.056895 | -0.10447 |

|                   |          |          |          |          |          |          |
|-------------------|----------|----------|----------|----------|----------|----------|
| NONHSAT199820.1   | -1.0707  | 3.034631 | -6.35952 | 0.000963 | 0.056895 | -0.10589 |
| NONHSAT191190.1   | 1.387608 | 4.64887  | 6.356233 | 0.000966 | 0.056947 | -0.10852 |
| lnc-SENP8-1:2     | -1.18955 | 1.844968 | -6.35609 | 0.000966 | 0.056947 | -0.10863 |
| NONHSAT208897.1   | 1.075057 | 1.894969 | 6.355051 | 0.000967 | 0.05696  | -0.10946 |
| lnc-ZDHHC11-3:1   | 1.412879 | 5.518939 | 6.351893 | 0.000969 | 0.056992 | -0.11199 |
| MSTRG.50353.1     | 1.670747 | 3.352302 | 6.351339 | 0.000969 | 0.056992 | -0.11243 |
| MSTRG.50782.1     | 1.402451 | 1.75133  | 6.348698 | 0.000971 | 0.057037 | -0.11455 |
| MSTRG.4114.1      | -1.10106 | 4.284426 | -6.34721 | 0.000972 | 0.057037 | -0.11575 |
| lnc-UCK2-5:1      | 1.115807 | 2.037321 | 6.34445  | 0.000975 | 0.057037 | -0.11796 |
| ENST00000605334.1 | -2.15467 | 3.653454 | -6.3432  | 0.000976 | 0.057037 | -0.11896 |
| ENST00000563503.1 | -1.64515 | 2.471074 | -6.34317 | 0.000976 | 0.057037 | -0.11898 |
| NONHSAT159744.1   | -1.63674 | 2.152736 | -6.3421  | 0.000976 | 0.057037 | -0.11984 |
| NONHSAT178955.1   | 2.937914 | 2.998901 | 6.336252 | 0.000981 | 0.057083 | -0.12454 |
| NONHSAT172209.1   | -1.22114 | 5.001047 | -6.33433 | 0.000982 | 0.057083 | -0.12608 |
| NONHSAT165025.1   | 1.06916  | 5.371152 | 6.333449 | 0.000983 | 0.057083 | -0.12679 |
| MSTRG.49058.1     | -1.31846 | 1.872384 | -6.33263 | 0.000984 | 0.057083 | -0.12745 |
| lnc-ZNF574-1:6    | 1.574853 | 4.79122  | 6.332265 | 0.000984 | 0.057083 | -0.12774 |
| NONHSAT173961.1   | 1.308836 | 1.749887 | 6.330516 | 0.000985 | 0.057096 | -0.12914 |
| ENST00000668921.1 | 1.090251 | 4.305045 | 6.323005 | 0.000991 | 0.057306 | -0.13518 |
| lnc-ANKRD46-5:1   | 2.015787 | 2.491278 | 6.321242 | 0.000992 | 0.057306 | -0.1366  |
| MSTRG.44436.21    | 2.435663 | 2.729542 | 6.320823 | 0.000993 | 0.057306 | -0.13694 |
| NONHSAT185514.1   | 1.012563 | 5.240521 | 6.318511 | 0.000995 | 0.057306 | -0.1388  |
| ENST00000616998.1 | -1.16847 | 6.726636 | -6.31595 | 0.000997 | 0.057306 | -0.14086 |
| ENST00000576365.1 | -1.05746 | 8.394088 | -6.31421 | 0.000998 | 0.057306 | -0.14226 |
| lnc-RPS14-2:1     | -1.11819 | 4.8497   | -6.31332 | 0.000999 | 0.057306 | -0.14298 |
| lnc-C10orf143-5:1 | 1.098581 | 2.95459  | 6.312997 | 0.000999 | 0.057306 | -0.14324 |
| NONHSAT204887.1   | 1.305736 | 2.17805  | 6.312703 | 0.000999 | 0.057306 | -0.14348 |
| NONHSAT210187.1   | 1.259286 | 4.122936 | 6.311779 | 0.001    | 0.057306 | -0.14422 |
| NONHSAT223272.1   | -1.64894 | 2.305617 | -6.31153 | 0.001    | 0.057306 | -0.14442 |
| ENST00000501440.1 | 1.12689  | 6.235317 | 6.310614 | 0.001001 | 0.057306 | -0.14516 |
| NONHSAT190412.1   | 1.332424 | 4.395585 | 6.310261 | 0.001001 | 0.057306 | -0.14545 |
| MSTRG.68158.1     | -1.53609 | 3.570135 | -6.30907 | 0.001002 | 0.057306 | -0.1464  |
| ENST00000669014.1 | -2.3681  | 3.608127 | -6.30671 | 0.001004 | 0.05738  | -0.14831 |
| lnc-TSPAN8-1:3    | 1.033489 | 1.797022 | 6.302298 | 0.001007 | 0.057482 | -0.15187 |
| lnc-VWA8-10:1     | -1.86959 | 2.842972 | -6.30079 | 0.001009 | 0.057507 | -0.15309 |
| ENST00000671297.1 | -1.85174 | 3.155137 | -6.29867 | 0.00101  | 0.057507 | -0.1548  |
| lnc-TREM2-1:1     | -1.5052  | 3.386202 | -6.29802 | 0.001011 | 0.057507 | -0.15532 |
| NONHSAT167179.1   | 1.953247 | 4.811041 | 6.295462 | 0.001013 | 0.057507 | -0.15739 |
| ENST00000521188.1 | 1.02524  | 1.624315 | 6.294812 | 0.001013 | 0.057507 | -0.15792 |
| ENST00000649504.1 | 1.641982 | 1.891874 | 6.294668 | 0.001013 | 0.057507 | -0.15803 |
| NONHSAT217657.1   | 1.542132 | 4.474413 | 6.293309 | 0.001014 | 0.057507 | -0.15913 |
| LINC02251:7       | 1.129884 | 5.140899 | 6.292251 | 0.001015 | 0.057507 | -0.15999 |
| lnc-PMFBP1-3:6    | -1.21348 | 4.933963 | -6.28926 | 0.001018 | 0.057507 | -0.16241 |
| NONHSAT204158.1   | -1.8492  | 2.718584 | -6.28907 | 0.001018 | 0.057507 | -0.16256 |
| NR_003706         | -1.11055 | 5.897761 | -6.28898 | 0.001018 | 0.057507 | -0.16263 |
| NONHSAT156302.1   | 1.101318 | 2.675917 | 6.288865 | 0.001018 | 0.057507 | -0.16272 |
| MSTRG.66149.1     | -1.22992 | 1.986102 | -6.28811 | 0.001019 | 0.057508 | -0.16333 |
| lnc-LYPD6-12:1    | 1.673979 | 4.68725  | 6.285322 | 0.001021 | 0.057546 | -0.16559 |

|                   |          |          |          |          |          |          |
|-------------------|----------|----------|----------|----------|----------|----------|
| NONHSAT218783.1   | 1.332371 | 2.578631 | 6.285171 | 0.001021 | 0.057546 | -0.16571 |
| NONHSAT216140.1   | 1.7886   | 2.418338 | 6.283988 | 0.001022 | 0.057546 | -0.16667 |
| ENST00000502344.5 | 1.089806 | 1.640146 | 6.280742 | 0.001025 | 0.057585 | -0.1693  |
| NONHSAT161580.1   | 1.172544 | 7.604423 | 6.2778   | 0.001027 | 0.057623 | -0.17168 |
| NONHSAT183450.1   | 1.791348 | 2.007285 | 6.269827 | 0.001033 | 0.057672 | -0.17814 |
| NONHSAT154599.1   | 1.661168 | 3.42241  | 6.26546  | 0.001037 | 0.057672 | -0.18169 |
| NONHSAT221751.1   | 1.327374 | 1.723969 | 6.264713 | 0.001038 | 0.057672 | -0.18229 |
| lnc-ZSCAN30-9:2   | 1.6063   | 2.998661 | 6.261276 | 0.00104  | 0.057672 | -0.18508 |
| lnc-C2orf73-2:1   | -1.70328 | 2.029669 | -6.26084 | 0.001041 | 0.057672 | -0.18544 |
| MSTRG.47842.1     | 1.251783 | 1.650811 | 6.260484 | 0.001041 | 0.057672 | -0.18573 |
| NONHSAT161094.1   | -1.26201 | 5.002833 | -6.25861 | 0.001043 | 0.057672 | -0.18725 |
| NONHSAT167388.1   | -1.88184 | 6.107833 | -6.25683 | 0.001044 | 0.057672 | -0.1887  |
| ENST00000452288.1 | -1.82001 | 2.512321 | -6.25425 | 0.001046 | 0.057672 | -0.19079 |
| lnc-HAPLN3-3:1    | -1.19136 | 3.404594 | -6.25258 | 0.001048 | 0.057672 | -0.19215 |
| NONHSAT179300.1   | 1.209749 | 5.39619  | 6.251116 | 0.001049 | 0.057672 | -0.19334 |
| lnc-FAM149B1-8:1  | 1.706884 | 4.39091  | 6.250753 | 0.001049 | 0.057672 | -0.19364 |
| lnc-ZXDB-3:1      | 1.467367 | 5.691733 | 6.249007 | 0.001051 | 0.057672 | -0.19506 |
| MSTRG.1548.1      | -1.3559  | 3.576359 | -6.24835 | 0.001051 | 0.057672 | -0.19559 |
| NONHSAT200992.1   | 1.26179  | 2.608701 | 6.244619 | 0.001054 | 0.057771 | -0.19863 |
| lnc-HAO2-11:5     | 1.662999 | 1.850012 | 6.242302 | 0.001056 | 0.057844 | -0.20052 |
| lnc-TMEM200B-2:1  | 1.644603 | 1.897597 | 6.241649 | 0.001057 | 0.057844 | -0.20105 |
| lnc-CRNKL1-6:1    | -1.21227 | 3.247691 | -6.23871 | 0.001059 | 0.057916 | -0.20344 |
| NONHSAT201694.1   | 2.826798 | 2.731189 | 6.236572 | 0.001061 | 0.057939 | -0.20519 |
| ENST00000668438.1 | 1.960504 | 2.005416 | 6.236434 | 0.001061 | 0.057939 | -0.2053  |
| NONHSAT187439.1   | 1.030584 | 6.056684 | 6.23431  | 0.001063 | 0.057939 | -0.20703 |
| lnc-CEP128-2:1    | 2.595994 | 3.179868 | 6.234021 | 0.001063 | 0.057939 | -0.20727 |
| lnc-MYC-20:1      | 1.070588 | 4.156624 | 6.232163 | 0.001065 | 0.057939 | -0.20878 |
| lnc-GGTLC1-6:1    | -1.29066 | 5.624681 | -6.23072 | 0.001066 | 0.057939 | -0.20996 |
| T219111           | 1.092544 | 4.365787 | 6.230709 | 0.001066 | 0.057939 | -0.20997 |
| NONHSAT184413.1   | -1.20402 | 4.346752 | -6.22875 | 0.001068 | 0.057955 | -0.21157 |
| lnc-LIG1-2:1      | 1.102543 | 7.399468 | 6.226501 | 0.001069 | 0.057955 | -0.2134  |
| NONHSAT217711.1   | -1.72671 | 2.465746 | -6.22428 | 0.001071 | 0.058016 | -0.21522 |
| ENST00000504610.2 | 1.048773 | 6.006767 | 6.221839 | 0.001073 | 0.058066 | -0.21721 |
| ENST00000440900.1 | 1.319138 | 1.723433 | 6.219161 | 0.001076 | 0.05808  | -0.2194  |
| ENST00000423838.1 | 2.024097 | 3.025791 | 6.218698 | 0.001076 | 0.05808  | -0.21978 |
| NONHSAT204084.1   | 1.357214 | 4.241945 | 6.217405 | 0.001077 | 0.05808  | -0.22083 |
| T314485           | -1.09118 | 3.145656 | -6.21618 | 0.001078 | 0.05808  | -0.22184 |
| lnc-DNAJC24-6:1   | -1.20405 | 4.693325 | -6.21613 | 0.001078 | 0.05808  | -0.22187 |
| LINC00938:7       | -1.66197 | 2.956466 | -6.21514 | 0.001079 | 0.058095 | -0.22269 |
| lnc-C8orf34-2:1   | -1.72405 | 8.135274 | -6.21342 | 0.001081 | 0.058118 | -0.22409 |
| lnc-IL7-3:1       | -1.00314 | 8.43155  | -6.21331 | 0.001081 | 0.058118 | -0.22418 |
| lnc-ZNF577-1:1    | -1.05573 | 3.256839 | -6.21076 | 0.001083 | 0.058165 | -0.22627 |
| NONHSAT184132.1   | -1.43918 | 3.432224 | -6.21041 | 0.001083 | 0.058165 | -0.22656 |
| NONHSAT224347.1   | 2.257516 | 3.55166  | 6.200047 | 0.001092 | 0.058348 | -0.23505 |
| MSTRG.22953.2     | -1.4481  | 4.001354 | -6.19998 | 0.001092 | 0.058348 | -0.2351  |
| lnc-ERG-4:1       | 2.443192 | 2.317187 | 6.198587 | 0.001093 | 0.058348 | -0.23624 |
| MSTRG.64245.1     | 1.3228   | 2.917311 | 6.197785 | 0.001094 | 0.058348 | -0.2369  |
| lnc-FBXO9-6:1     | -1.08535 | 5.541115 | -6.19678 | 0.001095 | 0.058348 | -0.23772 |

|                   |          |          |          |          |          |          |
|-------------------|----------|----------|----------|----------|----------|----------|
| NONHSAT158087.1   | 1.052985 | 1.745359 | 6.196346 | 0.001095 | 0.058348 | -0.23808 |
| MSTRG.50048.2     | -1.94904 | 2.217701 | -6.19592 | 0.001096 | 0.058348 | -0.23843 |
| ENST00000538190.2 | 1.091058 | 2.086516 | 6.195667 | 0.001096 | 0.058348 | -0.23864 |
| lnc-TAOK3-10:1    | 1.732046 | 3.300023 | 6.193579 | 0.001098 | 0.058384 | -0.24035 |
| ENST00000606988.1 | -1.22683 | 3.095966 | -6.18956 | 0.001101 | 0.058509 | -0.24365 |
| ENST00000653501.1 | 2.252449 | 2.913834 | 6.185331 | 0.001105 | 0.058645 | -0.24712 |
| ENST00000471537.3 | 1.080333 | 6.934386 | 6.184438 | 0.001106 | 0.058656 | -0.24786 |
| ENST00000580270.1 | -1.44956 | 2.574198 | -6.18218 | 0.001108 | 0.0587   | -0.24971 |
| MSTRG.60188.1     | -1.03372 | 4.534089 | -6.18088 | 0.001109 | 0.05873  | -0.25078 |
| NONHSAT205068.1   | 1.921977 | 2.820771 | 6.177748 | 0.001112 | 0.058846 | -0.25336 |
| lnc-HMGN1-2:1     | -1.19402 | 4.30507  | -6.17683 | 0.001113 | 0.058858 | -0.25411 |
| lnc-PRPF18-14:1   | -1.15291 | 4.485523 | -6.17244 | 0.001117 | 0.058953 | -0.25772 |
| ENST00000668271.1 | 1.216597 | 4.402889 | 6.172328 | 0.001117 | 0.058953 | -0.25782 |
| MSTRG.15843.1     | 2.053425 | 6.915198 | 6.171777 | 0.001117 | 0.058953 | -0.25827 |
| NONHSAT174328.1   | 1.647007 | 1.981726 | 6.169936 | 0.001119 | 0.058953 | -0.25979 |
| lnc-COIL-4:1      | -1.00497 | 4.917023 | -6.16958 | 0.001119 | 0.058953 | -0.26008 |
| lnc-SNTG1-9:1     | -1.40049 | 5.159931 | -6.16602 | 0.001122 | 0.059067 | -0.26301 |
| NONHSAT177017.1   | 1.890017 | 2.23802  | 6.165114 | 0.001123 | 0.059071 | -0.26376 |
| NONHSAT200930.1   | 1.627638 | 5.202472 | 6.163675 | 0.001124 | 0.059108 | -0.26494 |
| lnc-WDPCP-5:1     | 1.457108 | 3.421121 | 6.159461 | 0.001128 | 0.059246 | -0.26842 |
| ENST00000671457.1 | 1.026522 | 11.79285 | 6.156819 | 0.001131 | 0.059341 | -0.2706  |
| MSTRG.42451.1     | 2.305549 | 2.57916  | 6.149715 | 0.001137 | 0.059461 | -0.27646 |
| NONHSAT205805.1   | 1.121455 | 4.87314  | 6.147614 | 0.001139 | 0.059461 | -0.2782  |
| LINC01036:28      | -1.03259 | 1.628924 | -6.14708 | 0.001139 | 0.059461 | -0.27864 |
| NONHSAT157985.1   | 1.397174 | 1.984399 | 6.146662 | 0.00114  | 0.059461 | -0.27899 |
| MSTRG.2445.1      | -1.86459 | 3.422068 | -6.14549 | 0.001141 | 0.059461 | -0.27995 |
| lnc-FGF12-1:2     | -1.06247 | 4.492978 | -6.14532 | 0.001141 | 0.059461 | -0.2801  |
| lnc-NAPIL5-4:1    | -1.72267 | 4.825726 | -6.14522 | 0.001141 | 0.059461 | -0.28018 |
| MSTRG.10921.1     | -1.53588 | 2.969986 | -6.13977 | 0.001146 | 0.059506 | -0.28469 |
| MSTRG.58424.1     | 1.119691 | 3.601477 | 6.137904 | 0.001148 | 0.059534 | -0.28623 |
| NONHSAT201262.1   | 2.376696 | 2.902548 | 6.133281 | 0.001152 | 0.059639 | -0.29006 |
| ENST00000604965.1 | -1.23979 | 5.373685 | -6.13316 | 0.001152 | 0.059639 | -0.29016 |
| lnc-ETAA1-14:1    | 1.071662 | 6.457593 | 6.131931 | 0.001153 | 0.059667 | -0.29117 |
| ENST00000635510.1 | 1.275921 | 3.697413 | 6.130408 | 0.001155 | 0.059679 | -0.29244 |
| lnc-CASD1-1:1     | -1.45549 | 2.469594 | -6.12772 | 0.001157 | 0.059746 | -0.29466 |
| NONHSAT222006.1   | 1.659031 | 2.300107 | 6.122062 | 0.001163 | 0.059839 | -0.29936 |
| NR_003693         | -1.22646 | 4.669416 | -6.12095 | 0.001164 | 0.059856 | -0.30028 |
| NONHSAT170538.1   | 1.069159 | 4.3965   | 6.120316 | 0.001164 | 0.059856 | -0.3008  |
| MSTRG.59196.1     | -1.54816 | 4.549967 | -6.11781 | 0.001166 | 0.059856 | -0.30288 |
| ENST00000653058.1 | 1.207214 | 2.897214 | 6.117706 | 0.001167 | 0.059856 | -0.30297 |
| MSTRG.16882.1     | 1.169396 | 4.337487 | 6.115556 | 0.001169 | 0.059856 | -0.30476 |
| NONHSAT174778.1   | 2.304246 | 2.321649 | 6.114275 | 0.00117  | 0.059856 | -0.30582 |
| LINC01833:24      | 1.655456 | 2.168975 | 6.114124 | 0.00117  | 0.059856 | -0.30594 |
| lnc-NCBP3-1:1     | -1.0254  | 7.080501 | -6.1139  | 0.00117  | 0.059856 | -0.30613 |
| MSTRG.14375.2     | 1.427722 | 5.243441 | 6.112895 | 0.001171 | 0.059856 | -0.30697 |
| NONHSAT185192.1   | 1.247418 | 4.814099 | 6.1124   | 0.001172 | 0.059856 | -0.30738 |
| NONHSAT164039.1   | 1.103341 | 1.705162 | 6.112141 | 0.001172 | 0.059856 | -0.30759 |
| NONHSAT172154.1   | -1.32081 | 2.326845 | -6.10989 | 0.001174 | 0.05987  | -0.30946 |

|                   |          |          |          |          |          |          |
|-------------------|----------|----------|----------|----------|----------|----------|
| NR_033987         | 1.665878 | 5.028549 | 6.108078 | 0.001176 | 0.05987  | -0.31097 |
| lnc-DGKH-1:1      | -1.00389 | 3.878267 | -6.10593 | 0.001178 | 0.059883 | -0.31275 |
| NR_110747         | -1.71784 | 3.03365  | -6.10156 | 0.001182 | 0.059935 | -0.31639 |
| MSTRG.62095.1     | -1.19777 | 5.861042 | -6.10094 | 0.001182 | 0.059935 | -0.31691 |
| NONHSAT161611.1   | 1.654334 | 4.700669 | 6.091072 | 0.001192 | 0.060174 | -0.32512 |
| lnc-STRN3-18:1    | -1.48189 | 3.148585 | -6.09025 | 0.001193 | 0.060174 | -0.32581 |
| lnc-SCN5A-3:1     | -1.17979 | 1.885292 | -6.08895 | 0.001194 | 0.060174 | -0.32689 |
| ENST00000649594.1 | 2.148481 | 2.176423 | 6.088616 | 0.001194 | 0.060174 | -0.32717 |
| T262091           | 1.335739 | 4.224706 | 6.088094 | 0.001195 | 0.060174 | -0.32761 |
| T184375           | -1.54376 | 2.732096 | -6.08347 | 0.001199 | 0.060235 | -0.33147 |
| MSTRG.32186.1     | 1.890789 | 2.027172 | 6.083129 | 0.0012   | 0.060235 | -0.33175 |
| PVT1:79           | -1.33526 | 6.236318 | -6.08289 | 0.0012   | 0.060235 | -0.33195 |
| lnc-ANKRD27-9:1   | -1.34813 | 4.054112 | -6.0813  | 0.001201 | 0.060235 | -0.33327 |
| NONHSAT221876.1   | 1.110837 | 5.360727 | 6.080637 | 0.001202 | 0.060235 | -0.33383 |
| ENST00000641190.1 | 1.141356 | 4.102298 | 6.080131 | 0.001202 | 0.060235 | -0.33425 |
| LINC01938:10      | 1.278632 | 3.553749 | 6.0795   | 0.001203 | 0.060235 | -0.33478 |
| MSTRG.23106.1     | 1.722256 | 4.374014 | 6.079459 | 0.001203 | 0.060235 | -0.33481 |
| MSTRG.23271.1     | -1.74135 | 2.471852 | -6.07785 | 0.001205 | 0.060283 | -0.33615 |
| NONHSAT210403.1   | 1.012599 | 5.596018 | 6.075357 | 0.001207 | 0.060331 | -0.33824 |
| MSTRG.56343.1     | -1.29334 | 2.645561 | -6.07366 | 0.001209 | 0.060331 | -0.33965 |
| lnc-MEF2C-8:1     | -1.65967 | 2.57077  | -6.07297 | 0.001209 | 0.060331 | -0.34023 |
| ENST00000667496.1 | 1.042788 | 3.92661  | 6.071496 | 0.001211 | 0.060337 | -0.34146 |
| ENST00000515882.2 | -1.48819 | 5.236503 | -6.06824 | 0.001214 | 0.06037  | -0.34419 |
| NONHSAT210612.1   | -1.45453 | 1.907298 | -6.06636 | 0.001216 | 0.060426 | -0.34576 |
| NONHSAT222553.1   | 1.601509 | 5.057562 | 6.063774 | 0.001218 | 0.060493 | -0.34792 |
| NONHSAT197805.1   | 1.009503 | 5.784642 | 6.059173 | 0.001223 | 0.060616 | -0.35178 |
| NONHSAT158375.1   | 1.928771 | 2.847568 | 6.057169 | 0.001225 | 0.06062  | -0.35345 |
| lnc-CIB1-5:2      | -1.36078 | 2.449718 | -6.05565 | 0.001227 | 0.06062  | -0.35473 |
| ENST00000658878.1 | 1.474803 | 4.173364 | 6.05545  | 0.001227 | 0.06062  | -0.35489 |
| ENST00000649682.2 | 1.172702 | 3.176313 | 6.049383 | 0.001233 | 0.060785 | -0.35998 |
| NONHSAT163651.1   | 2.207278 | 2.162845 | 6.048815 | 0.001233 | 0.060785 | -0.36046 |
| MSTRG.18858.1     | -1.41977 | 3.295922 | -6.04589 | 0.001236 | 0.060838 | -0.36291 |
| NONHSAT201412.1   | 1.012023 | 3.283435 | 6.042697 | 0.00124  | 0.060913 | -0.36559 |
| ENST00000379677.2 | 1.285616 | 3.227448 | 6.041976 | 0.00124  | 0.060913 | -0.3662  |
| lnc-SIK2-3:2      | -1.58851 | 1.893877 | -6.03924 | 0.001243 | 0.060944 | -0.36849 |
| ENST00000614119.1 | -1.69843 | 4.985549 | -6.03723 | 0.001245 | 0.060944 | -0.37018 |
| MSTRG.38136.1     | 1.404315 | 7.414897 | 6.036549 | 0.001246 | 0.060944 | -0.37076 |
| T127511           | -1.44775 | 2.055429 | -6.03626 | 0.001246 | 0.060944 | -0.371   |
| lnc-ECHDC3-6:1    | 1.093497 | 4.013552 | 6.035579 | 0.001247 | 0.060944 | -0.37157 |
| NONHSAT191749.1   | 1.188621 | 4.706412 | 6.034722 | 0.001248 | 0.060944 | -0.37229 |
| lnc-CLEC4C-1:1    | 2.279237 | 2.454733 | 6.034279 | 0.001248 | 0.060944 | -0.37267 |
| NONHSAT178944.1   | 2.585864 | 2.803139 | 6.033508 | 0.001249 | 0.060944 | -0.37331 |
| MSTRG.41610.78    | 2.100046 | 2.101762 | 6.029185 | 0.001253 | 0.060944 | -0.37695 |
| lnc-ARF4-2:1      | -1.29251 | 7.102437 | -6.02793 | 0.001254 | 0.060944 | -0.378   |
| lnc-RASEF-2:1     | 1.066669 | 1.605251 | 6.027733 | 0.001255 | 0.060944 | -0.37817 |
| NONHSAT196308.1   | -1.02006 | 4.658157 | -6.0243  | 0.001258 | 0.060944 | -0.38106 |
| ENST00000651456.1 | -1.80466 | 3.161663 | -6.0206  | 0.001262 | 0.060944 | -0.38418 |
| T338502           | 1.316204 | 3.808476 | 6.019874 | 0.001263 | 0.060944 | -0.38479 |

|                   |          |          |          |          |          |          |
|-------------------|----------|----------|----------|----------|----------|----------|
| NONHSAT223967.1   | 1.801764 | 5.633953 | 6.018023 | 0.001265 | 0.060944 | -0.38635 |
| NONHSAT153263.1   | 1.49574  | 2.134194 | 6.017036 | 0.001266 | 0.060944 | -0.38718 |
| MSTRG.10798.1     | 1.555841 | 2.67431  | 6.014278 | 0.001269 | 0.060953 | -0.38951 |
| NONHSAT154807.1   | 1.068553 | 1.591922 | 6.013163 | 0.00127  | 0.060953 | -0.39045 |
| lnc-FER-18:2      | 1.544945 | 3.33761  | 6.011588 | 0.001271 | 0.060953 | -0.39178 |
| lnc-SH3BGR-1:1    | 1.24048  | 1.644146 | 6.009701 | 0.001273 | 0.060963 | -0.39337 |
| lnc-TXNDC5-3:1    | -1.17099 | 4.032166 | -6.00962 | 0.001273 | 0.060963 | -0.39344 |
| NONHSAT164601.1   | -1.01758 | 3.015203 | -6.00878 | 0.001274 | 0.060963 | -0.39415 |
| lnc-NPM3-1:1      | -1.17543 | 6.705812 | -6.00852 | 0.001274 | 0.060963 | -0.39437 |
| T223628           | 1.45141  | 5.219496 | 6.003874 | 0.001279 | 0.060974 | -0.39829 |
| lnc-TRIO-5:1      | 1.087242 | 4.266657 | 5.996898 | 0.001287 | 0.061014 | -0.40418 |
| T309712           | 1.146541 | 4.052562 | 5.994922 | 0.001289 | 0.061014 | -0.40585 |
| LINC01356:1       | -1.17955 | 3.709961 | -5.99362 | 0.00129  | 0.061014 | -0.40696 |
| lnc-MED10-6:3     | 1.242867 | 3.607475 | 5.99356  | 0.00129  | 0.061014 | -0.40701 |
| lnc-NOP56-1:2     | -1.81779 | 2.355314 | -5.99187 | 0.001292 | 0.061014 | -0.40843 |
| NONHSAT186932.1   | 1.3773   | 2.016485 | 5.984994 | 0.001299 | 0.061108 | -0.41426 |
| NONHSAT166709.1   | 1.015589 | 3.549882 | 5.984546 | 0.0013   | 0.061108 | -0.41464 |
| NONHSAT219885.1   | 1.468659 | 4.447789 | 5.981852 | 0.001303 | 0.061136 | -0.41692 |
| lnc-FDX1-2:1      | -1.22589 | 4.044663 | -5.98149 | 0.001303 | 0.061136 | -0.41723 |
| lnc-SLCO1A2-5:1   | 1.919783 | 2.494211 | 5.981445 | 0.001303 | 0.061136 | -0.41726 |
| MSTRG.56895.1     | 1.51512  | 2.170864 | 5.980725 | 0.001304 | 0.061144 | -0.41787 |
| NONHSAT158206.1   | 1.580868 | 3.635309 | 5.977851 | 0.001307 | 0.061208 | -0.42031 |
| NONHSAT201126.1   | 1.637538 | 4.891624 | 5.977654 | 0.001307 | 0.061208 | -0.42048 |
| lnc-RFX7-1:1      | -1.51102 | 3.816366 | -5.97717 | 0.001308 | 0.061208 | -0.42089 |
| NR_038958         | -1.16915 | 2.284941 | -5.97582 | 0.001309 | 0.061243 | -0.42204 |
| lnc-SORCS3-7:1    | -1.19691 | 2.441714 | -5.97533 | 0.00131  | 0.061243 | -0.42245 |
| ENST00000415736.1 | 1.434482 | 4.970122 | 5.974693 | 0.00131  | 0.061245 | -0.42299 |
| NONHSAT161166.1   | -2.00578 | 2.296032 | -5.97368 | 0.001311 | 0.061245 | -0.42385 |
| NONHSAT205746.1   | 1.041055 | 4.068986 | 5.972872 | 0.001312 | 0.061245 | -0.42454 |
| lnc-ERGIC1-3:1    | 1.155815 | 7.102962 | 5.968745 | 0.001317 | 0.061273 | -0.42804 |
| MSTRG.52827.1     | -2.12526 | 2.845617 | -5.96828 | 0.001317 | 0.061273 | -0.42843 |
| NONHSAT176375.1   | 1.454094 | 3.002496 | 5.966212 | 0.001319 | 0.061332 | -0.43019 |
| NONHSAT206490.1   | 1.00726  | 5.02344  | 5.962806 | 0.001323 | 0.061393 | -0.43308 |
| lnc-ADGRF5-2:1    | 1.524338 | 4.554999 | 5.96272  | 0.001323 | 0.061393 | -0.43316 |
| lnc-MRGPRX2-1:1   | 1.212898 | 4.739891 | 5.961923 | 0.001324 | 0.061393 | -0.43384 |
| ITGB1-DT:30       | -1.55215 | 2.087672 | -5.96097 | 0.001325 | 0.061393 | -0.43464 |
| NONHSAT197259.1   | 1.781571 | 2.283013 | 5.960304 | 0.001326 | 0.061393 | -0.43521 |
| NONHSAT160239.1   | -1.13499 | 2.321533 | -5.95974 | 0.001326 | 0.061393 | -0.43569 |
| lnc-COG2-4:2      | -2.21175 | 2.926791 | -5.95959 | 0.001327 | 0.061393 | -0.43582 |
| ENST00000422799.1 | 1.076787 | 1.913136 | 5.958481 | 0.001328 | 0.061393 | -0.43676 |
| NR_110745         | 1.029162 | 1.687366 | 5.95782  | 0.001328 | 0.061393 | -0.43732 |
| NONHSAT171253.1   | -1.20667 | 4.814724 | -5.95692 | 0.001329 | 0.061406 | -0.43809 |
| NONHSAT166964.1   | 2.366148 | 2.276061 | 5.95478  | 0.001332 | 0.061458 | -0.43991 |
| MSTRG.3780.1      | 1.451358 | 6.635818 | 5.953029 | 0.001334 | 0.061463 | -0.4414  |
| NONHSAT217284.1   | -1.26671 | 3.852084 | -5.94922 | 0.001338 | 0.061598 | -0.44464 |
| NONHSAT206680.1   | -1.31215 | 4.72347  | -5.94825 | 0.001339 | 0.061607 | -0.44547 |
| lnc-ANKRD45-3:3   | 1.790512 | 3.814906 | 5.944962 | 0.001343 | 0.061621 | -0.44827 |
| MSTRG.47239.1     | 1.750252 | 2.511006 | 5.944693 | 0.001343 | 0.061621 | -0.4485  |

|                   |          |          |          |          |          |          |
|-------------------|----------|----------|----------|----------|----------|----------|
| NONHSAT217935.1   | 2.048048 | 2.777937 | 5.942824 | 0.001345 | 0.061625 | -0.45009 |
| NONHSAT206554.1   | 1.092737 | 2.495088 | 5.941974 | 0.001346 | 0.061625 | -0.45082 |
| MSTRG.9646.1      | 1.033041 | 4.731059 | 5.941491 | 0.001346 | 0.061625 | -0.45123 |
| NONHSAT207630.1   | 1.129737 | 1.702778 | 5.938671 | 0.00135  | 0.06163  | -0.45364 |
| LINC01270:16      | -1.59836 | 1.916735 | -5.93755 | 0.001351 | 0.06163  | -0.4546  |
| MSTRG.6354.1      | 1.310305 | 4.149363 | 5.933352 | 0.001355 | 0.061694 | -0.45818 |
| ENST00000412602.1 | 1.436823 | 1.977539 | 5.932999 | 0.001356 | 0.061694 | -0.45848 |
| MSTRG.43659.1     | -1.60941 | 2.525174 | -5.93198 | 0.001357 | 0.061717 | -0.45934 |
| ENST00000513358.3 | -1.09208 | 5.778136 | -5.92744 | 0.001362 | 0.061865 | -0.46323 |
| NONHSAT198023.1   | 1.746184 | 2.288766 | 5.919757 | 0.001371 | 0.062075 | -0.4698  |
| NONHSAT184025.1   | 2.216919 | 2.584909 | 5.916987 | 0.001374 | 0.062075 | -0.47217 |
| LINC01358:14      | -1.14127 | 1.849025 | -5.91659 | 0.001374 | 0.062075 | -0.47251 |
| lnc-GUSB-11:1     | 1.008132 | 7.224175 | 5.916163 | 0.001375 | 0.062075 | -0.47287 |
| lnc-SLC20A1-3:1   | -1.1942  | 1.947435 | -5.91528 | 0.001376 | 0.062075 | -0.47363 |
| NONHSAT223715.1   | 4.014175 | 3.753762 | 5.915166 | 0.001376 | 0.062075 | -0.47372 |
| NONHSAT164978.1   | 1.902276 | 2.181358 | 5.914875 | 0.001376 | 0.062075 | -0.47397 |
| lnc-KCTD18-2:1    | 1.610138 | 5.660102 | 5.91349  | 0.001378 | 0.062075 | -0.47516 |
| ENST00000527012.1 | -1.1913  | 4.297246 | -5.91295 | 0.001378 | 0.062075 | -0.47562 |
| lnc-COMMD6-6:1    | -2.02411 | 2.528887 | -5.91249 | 0.001379 | 0.062075 | -0.47602 |
| NONHSAT210523.1   | -1.19451 | 1.909908 | -5.91082 | 0.001381 | 0.062077 | -0.47745 |
| T334719           | -1.3316  | 3.698634 | -5.9089  | 0.001383 | 0.06212  | -0.47909 |
| lnc-PCBP1-7:1     | 1.594969 | 3.983531 | 5.907655 | 0.001385 | 0.062156 | -0.48016 |
| NONHSAT177107.1   | -1.65538 | 2.374821 | -5.90417 | 0.001389 | 0.062159 | -0.48315 |
| NONHSAT218126.1   | 2.417788 | 2.611483 | 5.903786 | 0.001389 | 0.062159 | -0.48348 |
| NR_110159         | 2.036309 | 8.409525 | 5.903199 | 0.00139  | 0.062159 | -0.48398 |
| NONHSAT186675.1   | -1.60797 | 3.948292 | -5.89892 | 0.001395 | 0.062199 | -0.48766 |
| ENST00000558572.1 | 1.916829 | 2.466503 | 5.898837 | 0.001395 | 0.062199 | -0.48772 |
| ENST00000498432.6 | -1.27977 | 4.229006 | -5.89839 | 0.001395 | 0.062199 | -0.4881  |
| MSTRG.66881.1     | 2.07632  | 2.107201 | 5.897564 | 0.001396 | 0.062199 | -0.48881 |
| lnc-C12orf74-13:2 | 1.377015 | 2.84135  | 5.896118 | 0.001398 | 0.062199 | -0.49006 |
| lnc-MPHOSPH8-11:3 | 1.115334 | 1.731842 | 5.895577 | 0.001398 | 0.062199 | -0.49052 |
| ENST00000559148.1 | -2.11001 | 2.874445 | -5.89421 | 0.0014   | 0.062241 | -0.49169 |
| MSTRG.35582.1     | 1.008405 | 6.130482 | 5.888858 | 0.001406 | 0.06247  | -0.49629 |
| ENST00000515153.1 | -1.26416 | 6.855323 | -5.88775 | 0.001408 | 0.06247  | -0.49725 |
| ENST00000655744.1 | 1.269209 | 1.775874 | 5.887256 | 0.001408 | 0.06247  | -0.49767 |
| MSTRG.34127.1     | 1.608897 | 6.20322  | 5.88672  | 0.001409 | 0.06247  | -0.49813 |
| NONHSAT165853.1   | 1.564606 | 1.805579 | 5.883492 | 0.001412 | 0.062576 | -0.50091 |
| ENST00000454781.6 | -1.25762 | 2.093244 | -5.87929 | 0.001417 | 0.062653 | -0.50452 |
| lnc-DHX37-25:1    | -1.12895 | 6.750555 | -5.87848 | 0.001418 | 0.062653 | -0.50522 |
| T313558           | 2.806537 | 2.950761 | 5.877782 | 0.001419 | 0.062653 | -0.50582 |
| NONHSAT205265.1   | 1.400657 | 4.3191   | 5.877614 | 0.001419 | 0.062653 | -0.50597 |
| lnc-MEGF10-2:1    | 1.666127 | 2.481581 | 5.873973 | 0.001424 | 0.062653 | -0.5091  |
| lnc-ARMCX4-3:1    | -1.44437 | 1.856895 | -5.87233 | 0.001426 | 0.06269  | -0.51052 |
| NONHSAT197795.1   | 1.080529 | 7.640756 | 5.870548 | 0.001428 | 0.062746 | -0.51206 |
| NONHSAT212523.1   | -1.62525 | 2.083541 | -5.8702  | 0.001428 | 0.062746 | -0.51235 |
| NONHSAT160640.1   | 2.06409  | 2.587756 | 5.86656  | 0.001432 | 0.062826 | -0.51549 |
| NONHSAT182546.1   | 2.036521 | 4.398157 | 5.864672 | 0.001435 | 0.062849 | -0.51712 |
| lnc-COMMD10-6:1   | -1.05583 | 5.2017   | -5.86427 | 0.001435 | 0.062849 | -0.51747 |



|                   |          |          |          |          |          |          |
|-------------------|----------|----------|----------|----------|----------|----------|
| NONHSAT195170.1   | 1.414542 | 3.633793 | 5.863579 | 0.001436 | 0.062849 | -0.51807 |
| lnc-MAP3K3-1:1    | -1.22908 | 3.726769 | -5.86352 | 0.001436 | 0.062849 | -0.51812 |
| NONHSAT198634.1   | -1.37358 | 2.394009 | -5.86237 | 0.001437 | 0.062881 | -0.51911 |
| MSTRG.9960.1      | -1.69513 | 5.191942 | -5.85973 | 0.001441 | 0.062988 | -0.52139 |
| MSTRG.38433.1     | 1.151991 | 1.897031 | 5.853049 | 0.001449 | 0.063122 | -0.52716 |
| lnc-TLX3-8:1      | -1.13201 | 4.636765 | -5.85219 | 0.00145  | 0.063122 | -0.52791 |
| ENST00000509194.1 | -1.37199 | 4.581345 | -5.85008 | 0.001452 | 0.063175 | -0.52973 |
| ENST00000503323.1 | 1.500911 | 2.452632 | 5.849939 | 0.001452 | 0.063175 | -0.52985 |
| MSTRG.70548.1     | 1.143767 | 3.768913 | 5.848569 | 0.001454 | 0.063196 | -0.53103 |
| NONHSAT188007.1   | -2.0372  | 2.560734 | -5.84608 | 0.001457 | 0.063246 | -0.53318 |
| MSTRG.44987.1     | 1.774352 | 4.63425  | 5.845278 | 0.001458 | 0.063261 | -0.53388 |
| NONHSAT170226.1   | 1.371553 | 5.527558 | 5.838537 | 0.001466 | 0.063479 | -0.53972 |
| MSTRG.31129.1     | 1.389232 | 2.852823 | 5.834673 | 0.001471 | 0.063561 | -0.54307 |
| ENST00000653247.1 | 1.322558 | 3.278748 | 5.8342   | 0.001472 | 0.063561 | -0.54348 |
| NONHSAT165209.1   | 1.406627 | 4.101259 | 5.833495 | 0.001472 | 0.063561 | -0.54409 |
| ENST00000635449.1 | -1.50302 | 1.985814 | -5.83113 | 0.001475 | 0.063561 | -0.54614 |
| lnc-CLMP-8:1      | 1.021836 | 2.717776 | 5.829392 | 0.001478 | 0.063561 | -0.54765 |
| lnc-NKAIN1-1:2    | -1.39716 | 5.81509  | -5.82932 | 0.001478 | 0.063561 | -0.54771 |
| T210371           | 1.31899  | 4.057502 | 5.826535 | 0.001481 | 0.063628 | -0.55013 |
| lnc-PIGP-1:1      | 2.190132 | 2.560643 | 5.824706 | 0.001483 | 0.063698 | -0.55171 |
| T083348           | 1.124033 | 1.976113 | 5.822358 | 0.001486 | 0.063705 | -0.55375 |
| MSTRG.50700.1     | 1.369824 | 4.499484 | 5.81949  | 0.00149  | 0.063705 | -0.55624 |
| lnc-GRIK3-2:1     | 1.617577 | 2.283577 | 5.816218 | 0.001494 | 0.063798 | -0.55909 |
| lnc-BRF1-65:1     | 2.701613 | 3.557931 | 5.814677 | 0.001496 | 0.063854 | -0.56043 |
| lnc-TMC8-4:1      | -1.16    | 4.538452 | -5.81092 | 0.001501 | 0.063999 | -0.56369 |
| ENST00000443284.1 | -1.22816 | 3.152925 | -5.81044 | 0.001501 | 0.063999 | -0.56411 |
| lnc-HECA-4:1      | -1.00692 | 1.670125 | -5.8083  | 0.001504 | 0.064038 | -0.56597 |
| lnc-FAM210A-7:1   | 1.404404 | 1.794667 | 5.805994 | 0.001507 | 0.064048 | -0.56798 |
| NONHSAT166773.1   | 1.138963 | 4.494335 | 5.802673 | 0.001511 | 0.064136 | -0.57087 |
| NR_033652         | 1.36898  | 5.404259 | 5.798874 | 0.001516 | 0.064136 | -0.57418 |
| T114599           | 1.376848 | 3.815981 | 5.797861 | 0.001517 | 0.064136 | -0.57507 |
| ENST00000577309.1 | 1.134279 | 4.146452 | 5.795185 | 0.00152  | 0.064136 | -0.5774  |
| lnc-NOB1-2:1      | -1.26485 | 5.902487 | -5.79478 | 0.001521 | 0.064136 | -0.57775 |
| lnc-COL26A1-3:2   | 1.398474 | 4.718989 | 5.79478  | 0.001521 | 0.064136 | -0.57775 |
| lnc-ADGRV1-11:1   | 1.147037 | 4.920539 | 5.790861 | 0.001526 | 0.064136 | -0.58117 |
| ENST00000671287.1 | -1.16108 | 1.654051 | -5.79015 | 0.001527 | 0.064136 | -0.58179 |
| ENST00000605480.1 | -1.19841 | 2.891688 | -5.7893  | 0.001528 | 0.064136 | -0.58253 |
| lnc-IFNA1-5:1     | -1.01861 | 5.736886 | -5.78909 | 0.001528 | 0.064136 | -0.58272 |
| NONHSAT201845.1   | 1.214781 | 5.33026  | 5.788927 | 0.001528 | 0.064136 | -0.58286 |
| MSTRG.40845.1     | 2.111365 | 2.56634  | 5.788435 | 0.001529 | 0.064136 | -0.58329 |
| lnc-NRP1-7:1      | 2.056066 | 2.575913 | 5.788384 | 0.001529 | 0.064136 | -0.58333 |
| NONHSAT150381.1   | -1.19862 | 5.721252 | -5.78644 | 0.001532 | 0.064164 | -0.58503 |
| lnc-CHD2-9:1      | -1.45695 | 6.063533 | -5.78637 | 0.001532 | 0.064164 | -0.58509 |
| NONHSAT150139.1   | -1.36394 | 2.734544 | -5.78555 | 0.001533 | 0.064182 | -0.58581 |
| NONHSAT188135.1   | 1.56139  | 2.441814 | 5.7839   | 0.001535 | 0.064185 | -0.58725 |
| NONHSAT210761.1   | 1.162402 | 5.174648 | 5.780915 | 0.001539 | 0.064272 | -0.58986 |
| lnc-USP9Y-10:1    | -1.09689 | 1.788563 | -5.77811 | 0.001542 | 0.064345 | -0.59231 |
| lnc-GPR75-3:1     | -1.11377 | 1.804951 | -5.77747 | 0.001543 | 0.064345 | -0.59287 |

|                   |          |          |          |          |          |          |
|-------------------|----------|----------|----------|----------|----------|----------|
| NONHSAT214501.1   | 1.252919 | 2.321014 | 5.776912 | 0.001544 | 0.064345 | -0.59336 |
| MSTRG.51632.1     | 1.339416 | 3.483341 | 5.776613 | 0.001544 | 0.064345 | -0.59362 |
| ENST00000568911.5 | -1.99404 | 3.302844 | -5.77271 | 0.001549 | 0.064487 | -0.59703 |
| MSTRG.17241.3     | 1.415524 | 1.777728 | 5.772523 | 0.00155  | 0.064487 | -0.5972  |
| NONHSAT189382.1   | -1.20052 | 3.884512 | -5.77184 | 0.001551 | 0.064497 | -0.59779 |
| lnc-FILIP1L-6:1   | -2.31212 | 4.40003  | -5.76994 | 0.001553 | 0.064573 | -0.59945 |
| NONHSAT205253.1   | 1.080069 | 3.033821 | 5.769171 | 0.001554 | 0.064589 | -0.60013 |
| lnc-ZFP90-2:1     | 1.722089 | 4.690135 | 5.764298 | 0.00156  | 0.064719 | -0.6044  |
| NONHSAT208159.1   | 2.247341 | 5.462588 | 5.764083 | 0.001561 | 0.064719 | -0.60459 |
| lnc-CST8-5:1      | 2.033967 | 2.161879 | 5.763847 | 0.001561 | 0.064719 | -0.60479 |
| lnc-NEK11-4:1     | -1.16285 | 4.655378 | -5.76156 | 0.001564 | 0.06479  | -0.60679 |
| lnc-MPZL3-4:1     | -1.13101 | 9.781642 | -5.75882 | 0.001568 | 0.06486  | -0.6092  |
| lnc-MARF1-1:2     | -1.01574 | 5.917673 | -5.75569 | 0.001572 | 0.064967 | -0.61194 |
| ENST00000533859.1 | 1.159431 | 4.286763 | 5.752603 | 0.001576 | 0.065031 | -0.61465 |
| NONHSAT213668.1   | -1.31238 | 2.488752 | -5.75206 | 0.001577 | 0.065031 | -0.61513 |
| ENST00000449034.1 | -1.50755 | 3.434253 | -5.75098 | 0.001578 | 0.06505  | -0.61608 |
| lnc-PCMTD2-2:3    | 1.084303 | 3.542205 | 5.749453 | 0.00158  | 0.065081 | -0.61742 |
| lnc-HS3ST3B1-10:1 | -1.19599 | 6.331648 | -5.74713 | 0.001583 | 0.065181 | -0.61946 |
| ENST00000434112.1 | -1.6576  | 3.557078 | -5.74602 | 0.001585 | 0.065197 | -0.62043 |
| NONHSAT165013.1   | 1.361313 | 3.412379 | 5.745224 | 0.001586 | 0.065207 | -0.62114 |
| NONHSAT180304.1   | 2.496201 | 2.969276 | 5.743691 | 0.001588 | 0.065255 | -0.62248 |
| MSTRG.19197.1     | 2.037867 | 2.648474 | 5.743335 | 0.001588 | 0.065255 | -0.62279 |
| lnc-RPL7-3:2      | -1.4281  | 4.178927 | -5.74061 | 0.001592 | 0.06527  | -0.62519 |
| NONHSAT206487.1   | 1.200628 | 6.412009 | 5.740561 | 0.001592 | 0.06527  | -0.62523 |
| MSTRG.27268.7     | 1.11116  | 4.635278 | 5.737142 | 0.001597 | 0.065274 | -0.62824 |
| lnc-CDH3-3:1      | 2.390093 | 2.627616 | 5.736992 | 0.001597 | 0.065274 | -0.62837 |
| lnc-GLIS1-2:3     | -1.39005 | 1.989431 | -5.73292 | 0.001602 | 0.065408 | -0.63195 |
| NONHSAT184782.1   | 1.70134  | 4.705363 | 5.72881  | 0.001608 | 0.06548  | -0.63558 |
| MSTRG.18373.1     | 1.878573 | 2.666065 | 5.728017 | 0.001609 | 0.06548  | -0.63628 |
| lnc-APMAP-2:1     | 1.423876 | 3.062257 | 5.72752  | 0.00161  | 0.06548  | -0.63671 |
| ENST00000424355.1 | -1.63492 | 2.13048  | -5.72719 | 0.00161  | 0.06548  | -0.637   |
| lnc-GK3P-6:1      | 1.411953 | 4.828528 | 5.726841 | 0.001611 | 0.06548  | -0.63731 |
| ENST00000440413.1 | 1.433784 | 4.416742 | 5.725099 | 0.001613 | 0.065503 | -0.63885 |
| ENST00000509924.3 | 1.639917 | 7.340392 | 5.724518 | 0.001614 | 0.065503 | -0.63936 |
| MSTRG.42620.1     | 1.631553 | 1.861681 | 5.722549 | 0.001616 | 0.065521 | -0.6411  |
| ENST00000663734.1 | -1.91577 | 2.541502 | -5.72088 | 0.001619 | 0.065573 | -0.64257 |
| lnc-ARFGEF2-4:1   | 1.516601 | 2.120542 | 5.719225 | 0.001621 | 0.065632 | -0.64403 |
| lnc-NR3C2-7:2     | 1.562875 | 1.856152 | 5.717643 | 0.001623 | 0.065632 | -0.64542 |
| NONHSAT193412.1   | -2.04159 | 2.384737 | -5.717   | 0.001624 | 0.065632 | -0.646   |
| NONHSAT193115.1   | 1.540605 | 5.034968 | 5.716403 | 0.001625 | 0.065632 | -0.64652 |
| ENST00000587412.1 | 1.039301 | 5.64212  | 5.716035 | 0.001625 | 0.065632 | -0.64684 |
| lnc-KCNS3-1:1     | -1.95648 | 4.632682 | -5.71518 | 0.001627 | 0.065653 | -0.6476  |
| T234182           | 1.325448 | 1.762269 | 5.709448 | 0.001634 | 0.065819 | -0.65266 |
| NONHSAT191647.1   | 1.132984 | 4.3381   | 5.706397 | 0.001639 | 0.065853 | -0.65536 |
| NONHSAT214396.1   | -1.57924 | 2.087815 | -5.70638 | 0.001639 | 0.065853 | -0.65537 |
| NR_024627         | 2.165337 | 5.429499 | 5.705241 | 0.00164  | 0.065853 | -0.65638 |
| lnc-RTN4R-1:5     | 1.408006 | 1.823628 | 5.705047 | 0.001641 | 0.065853 | -0.65655 |
| MSTRG.67087.6     | 1.694484 | 1.959918 | 5.704538 | 0.001641 | 0.065853 | -0.657   |

|                    |          |          |          |          |          |          |
|--------------------|----------|----------|----------|----------|----------|----------|
| lnc-CFAP99-7:1     | 1.353452 | 3.159637 | 5.70328  | 0.001643 | 0.065871 | -0.65811 |
| ENST00000412918.1  | 1.879421 | 2.265308 | 5.701068 | 0.001646 | 0.065937 | -0.66007 |
| ENST00000549710.1  | 2.278735 | 2.899385 | 5.699814 | 0.001648 | 0.06596  | -0.66118 |
| MSTRG.36159.1      | 1.238704 | 1.654675 | 5.698815 | 0.001649 | 0.06599  | -0.66206 |
| NONHSAT154697.1    | 1.506141 | 2.548028 | 5.69764  | 0.001651 | 0.06603  | -0.6631  |
| ENST00000420705.2  | 1.437479 | 2.220522 | 5.69644  | 0.001653 | 0.066071 | -0.66417 |
| lnc-RXFP4-2:2      | 1.026656 | 5.075736 | 5.69251  | 0.001658 | 0.066132 | -0.66765 |
| lnc-DHX15-1:2      | -1.46221 | 4.651895 | -5.69224 | 0.001658 | 0.066132 | -0.66789 |
| lnc-TMEM168-4:1    | -1.28975 | 7.173495 | -5.69174 | 0.001659 | 0.066132 | -0.66833 |
| NONHSAT172266.1    | -1.01817 | 3.438888 | -5.68999 | 0.001662 | 0.066171 | -0.66988 |
| NONHSAT206525.1    | 1.83381  | 3.215451 | 5.689269 | 0.001663 | 0.066186 | -0.67052 |
| MSTRG.55088.1      | -1.85873 | 2.985125 | -5.68583 | 0.001668 | 0.066249 | -0.67357 |
| ENST00000559041.1  | -1.38713 | 3.932545 | -5.68265 | 0.001672 | 0.066298 | -0.67639 |
| lnc-SPERT-3:1      | 1.256522 | 4.648442 | 5.681438 | 0.001674 | 0.06632  | -0.67746 |
| NONHSAT155187.1    | 1.367859 | 6.213416 | 5.68134  | 0.001674 | 0.06632  | -0.67755 |
| lnc-SASS6-5:2      | -1.25885 | 3.554967 | -5.67798 | 0.001679 | 0.066458 | -0.68054 |
| MSTRG.43574.1      | 1.554335 | 4.068985 | 5.674559 | 0.001684 | 0.066573 | -0.68357 |
| ENST00000658044.1  | -1.04684 | 5.29121  | -5.67357 | 0.001685 | 0.066603 | -0.68445 |
| lnc-NIFK-1:3       | 1.157223 | 3.600358 | 5.667017 | 0.001694 | 0.066824 | -0.69028 |
| NONHSAT198031.1    | 1.033041 | 5.043112 | 5.666474 | 0.001695 | 0.066824 | -0.69076 |
| lnc-GNRH2-1:1      | -1.41923 | 4.211335 | -5.66265 | 0.001701 | 0.066911 | -0.69416 |
| lnc-FAT3-6:1       | -1.85179 | 2.643854 | -5.66123 | 0.001703 | 0.066911 | -0.69543 |
| NONHSAT173947.1    | 1.142843 | 1.90593  | 5.659089 | 0.001706 | 0.066911 | -0.69733 |
| lnc-MEST-6:1       | -1.25481 | 4.516338 | -5.65771 | 0.001708 | 0.066911 | -0.69856 |
| lnc-CTNND2-1:3     | -1.25048 | 2.187058 | -5.65717 | 0.001709 | 0.066911 | -0.69904 |
| T213659            | -1.06612 | 5.667049 | -5.65701 | 0.001709 | 0.066911 | -0.69918 |
| NONHSAT166690.1    | 1.788717 | 7.36978  | 5.656176 | 0.00171  | 0.066911 | -0.69993 |
| ENST00000475981.6  | 1.347734 | 2.028936 | 5.65453  | 0.001713 | 0.066911 | -0.70139 |
| MSTRG.36424.3      | 1.634018 | 4.312167 | 5.654226 | 0.001713 | 0.066911 | -0.70166 |
| ENST00000456087.1  | -1.19904 | 4.215416 | -5.654   | 0.001713 | 0.066911 | -0.70186 |
| NONHSAT163663.1    | 1.735529 | 2.219179 | 5.651967 | 0.001716 | 0.067002 | -0.70368 |
| KDM4A-AS1:10       | -1.35602 | 5.8922   | -5.6507  | 0.001718 | 0.067048 | -0.70481 |
| MSTRG.17479.1      | 1.174495 | 2.058886 | 5.646375 | 0.001725 | 0.06708  | -0.70866 |
| NONHSAT210333.1    | 1.475714 | 1.821066 | 5.645898 | 0.001725 | 0.06708  | -0.70909 |
| MSTRG.8286.1       | -1.56984 | 4.120119 | -5.64561 | 0.001726 | 0.06708  | -0.70934 |
| NONHSAT158962.1    | 1.487513 | 4.372461 | 5.645506 | 0.001726 | 0.06708  | -0.70944 |
| NONHSAT205289.1    | -1.56086 | 3.132958 | -5.64466 | 0.001727 | 0.06708  | -0.71019 |
| NONHSAT172153.1    | -1.68742 | 3.695069 | -5.6446  | 0.001727 | 0.06708  | -0.71025 |
| lnc-SLC39A11-10:48 | 1.065107 | 4.939352 | 5.644494 | 0.001727 | 0.06708  | -0.71034 |
| ENST00000663783.1  | 1.140268 | 4.208624 | 5.644049 | 0.001728 | 0.06708  | -0.71074 |
| lnc-FANCL-6:1      | -1.47755 | 2.31024  | -5.64381 | 0.001728 | 0.06708  | -0.71095 |
| MSTRG.51837.1      | 2.155672 | 2.910109 | 5.643231 | 0.001729 | 0.06708  | -0.71147 |
| ENST00000558258.1  | -1.11904 | 4.606123 | -5.64311 | 0.001729 | 0.06708  | -0.71158 |
| ENST00000600074.1  | 1.607192 | 4.180519 | 5.642925 | 0.00173  | 0.06708  | -0.71174 |
| lnc-MREG-3:1       | -1.13043 | 6.752142 | -5.6414  | 0.001732 | 0.067116 | -0.7131  |
| lnc-WDR37-5:3      | 1.198823 | 4.022348 | 5.63975  | 0.001734 | 0.067134 | -0.71458 |
| MSTRG.63393.9      | 1.993713 | 9.704844 | 5.637804 | 0.001737 | 0.067136 | -0.71631 |
| NONHSAT193978.1    | -1.11287 | 2.308705 | -5.63704 | 0.001738 | 0.067136 | -0.717   |

|                   |          |          |          |          |          |          |
|-------------------|----------|----------|----------|----------|----------|----------|
| NONHSAT175668.1   | 1.619074 | 1.930502 | 5.636811 | 0.001739 | 0.067136 | -0.7172  |
| MSTRG.7706.1      | 1.032861 | 3.214663 | 5.636262 | 0.00174  | 0.067136 | -0.71769 |
| NONHSAT218418.1   | 2.43553  | 2.519382 | 5.635767 | 0.00174  | 0.067136 | -0.71814 |
| lnc-P2RY1-3:5     | 1.83759  | 2.723115 | 5.635529 | 0.001741 | 0.067136 | -0.71835 |
| ENST00000526388.2 | 1.023332 | 5.724458 | 5.633755 | 0.001743 | 0.067146 | -0.71993 |
| lnc-RPGR-5:1      | 1.12199  | 4.820512 | 5.629486 | 0.00175  | 0.067262 | -0.72375 |
| NONHSAT184739.1   | -1.15412 | 4.034112 | -5.62687 | 0.001754 | 0.067315 | -0.72609 |
| NONHSAT162689.1   | -1.00839 | 5.628387 | -5.62679 | 0.001754 | 0.067315 | -0.72616 |
| NONHSAT156796.1   | -1.85507 | 3.257949 | -5.6262  | 0.001755 | 0.067323 | -0.72669 |
| NONHSAT191037.1   | 2.073375 | 2.49803  | 5.625513 | 0.001756 | 0.067337 | -0.72731 |
| MSTRG.52091.5     | 1.6598   | 2.404044 | 5.620846 | 0.001763 | 0.067535 | -0.73149 |
| T363705           | -1.22214 | 3.762251 | -5.62076 | 0.001763 | 0.067535 | -0.73156 |
| NONHSAT185771.1   | -1.18189 | 5.31843  | -5.61803 | 0.001767 | 0.067553 | -0.73401 |
| ENST00000607296.1 | 1.198062 | 4.992483 | 5.617966 | 0.001767 | 0.067553 | -0.73407 |
| NONHSAT193503.1   | 1.380997 | 4.24927  | 5.615534 | 0.001771 | 0.067553 | -0.73624 |
| NONHSAT193124.1   | -1.04162 | 6.07629  | -5.61546 | 0.001771 | 0.067553 | -0.73631 |
| NONHSAT203604.1   | -1.01581 | 1.874832 | -5.61503 | 0.001772 | 0.067553 | -0.73669 |
| lnc-CMPK2-7:1     | 1.234366 | 5.086249 | 5.612959 | 0.001775 | 0.067553 | -0.73855 |
| lnc-ZNF438-1:4    | -1.41541 | 4.55932  | -5.61242 | 0.001776 | 0.067559 | -0.73904 |
| NONHSAT219291.1   | 2.854655 | 3.109118 | 5.611838 | 0.001776 | 0.067567 | -0.73956 |
| MSTRG.42522.11    | -1.45838 | 3.204567 | -5.61054 | 0.001778 | 0.067591 | -0.74072 |
| lnc-GATA3-2:1     | 2.358218 | 2.583698 | 5.60885  | 0.001781 | 0.067613 | -0.74224 |
| NONHSAT177387.1   | 1.593688 | 1.849336 | 5.608206 | 0.001782 | 0.067625 | -0.74282 |
| MSTRG.44081.1     | -1.37673 | 2.110538 | -5.60563 | 0.001786 | 0.067661 | -0.74513 |
| NONHSAT205357.1   | 1.523718 | 3.40427  | 5.605364 | 0.001786 | 0.067661 | -0.74537 |
| NONHSAT152324.1   | 1.345875 | 5.018448 | 5.605164 | 0.001787 | 0.067661 | -0.74555 |
| MSTRG.19527.1     | -1.63817 | 2.766602 | -5.605   | 0.001787 | 0.067661 | -0.74569 |
| MSTRG.15821.1     | 1.127285 | 7.336254 | 5.604027 | 0.001788 | 0.067661 | -0.74657 |
| MSTRG.62922.1     | -1.00596 | 5.591048 | -5.60282 | 0.00179  | 0.067661 | -0.74765 |
| MSTRG.67250.1     | 1.00509  | 3.301915 | 5.602349 | 0.001791 | 0.067661 | -0.74808 |
| NR_027246         | -1.33982 | 4.780321 | -5.60071 | 0.001794 | 0.06768  | -0.74955 |
| NONHSAT173136.1   | -1.04094 | 9.679707 | -5.59856 | 0.001797 | 0.0677   | -0.75148 |
| MSTRG.795.1       | 1.646157 | 1.850363 | 5.598279 | 0.001797 | 0.0677   | -0.75173 |
| NONHSAT178084.1   | 1.075031 | 1.749998 | 5.597504 | 0.001798 | 0.0677   | -0.75243 |
| lnc-SLC9A8-3:1    | -1.67902 | 2.829167 | -5.59575 | 0.001801 | 0.0677   | -0.75401 |
| MSTRG.60047.1     | -1.36423 | 3.138394 | -5.59329 | 0.001805 | 0.067759 | -0.75622 |
| lnc-MED27-3:1     | -1.21122 | 4.209437 | -5.58963 | 0.001811 | 0.06789  | -0.75951 |
| ENST00000606008.1 | -1.07513 | 5.489799 | -5.58822 | 0.001813 | 0.067908 | -0.76078 |
| ENST00000615709.1 | -1.58335 | 3.681055 | -5.58753 | 0.001814 | 0.067919 | -0.76141 |
| lnc-GTF2H2-9:1    | 1.231362 | 5.886963 | 5.585505 | 0.001817 | 0.067941 | -0.76323 |
| MSTRG.14197.1     | 1.385557 | 5.904177 | 5.582613 | 0.001822 | 0.068006 | -0.76583 |
| NONHSAT219924.1   | -1.36794 | 1.802177 | -5.57817 | 0.001829 | 0.068158 | -0.76984 |
| NONHSAT212351.1   | 1.146175 | 3.62001  | 5.577062 | 0.00183  | 0.06816  | -0.77084 |
| NR_110826         | 1.965374 | 2.01149  | 5.57483  | 0.001834 | 0.068172 | -0.77285 |
| ENST00000430905.1 | 1.350307 | 5.312504 | 5.574652 | 0.001834 | 0.068172 | -0.77301 |
| lnc-SPATA6L-5:1   | -1.43214 | 3.805198 | -5.57443 | 0.001835 | 0.068172 | -0.77321 |
| NONHSAT160218.1   | 1.251019 | 3.156256 | 5.573556 | 0.001836 | 0.068172 | -0.774   |
| NONHSAT187637.1   | 2.534892 | 4.399002 | 5.572242 | 0.001838 | 0.068172 | -0.77518 |

|                   |          |          |          |          |          |          |
|-------------------|----------|----------|----------|----------|----------|----------|
| NONHSAT198737.1   | -1.35062 | 4.132114 | -5.57209 | 0.001838 | 0.068172 | -0.77532 |
| MSTRG.13138.1     | 1.013039 | 4.613679 | 5.571256 | 0.00184  | 0.068177 | -0.77607 |
| ENST00000670221.1 | 1.090891 | 4.349452 | 5.56914  | 0.001843 | 0.068195 | -0.77798 |
| NONHSAT164853.1   | -1.30446 | 2.618047 | -5.56668 | 0.001847 | 0.068203 | -0.78021 |
| lnc-PDK1-2:1      | -1.0428  | 3.648677 | -5.56646 | 0.001847 | 0.068203 | -0.78041 |
| NONHSAT168857.1   | 2.619369 | 2.932415 | 5.564383 | 0.001851 | 0.06828  | -0.78228 |
| ENST00000579033.1 | 1.460587 | 1.807602 | 5.56372  | 0.001852 | 0.06828  | -0.78288 |
| MSTRG.44407.1     | -1.07479 | 2.745659 | -5.56305 | 0.001853 | 0.06828  | -0.78348 |
| NONHSAT167728.1   | 2.457459 | 2.338339 | 5.562835 | 0.001853 | 0.06828  | -0.78368 |
| ENST00000453199.2 | 1.648042 | 5.010903 | 5.562613 | 0.001853 | 0.06828  | -0.78388 |
| NONHSAT181377.1   | 1.50853  | 3.873226 | 5.560366 | 0.001857 | 0.068347 | -0.78591 |
| MSTRG.56279.1     | 1.321593 | 3.914726 | 5.557562 | 0.001862 | 0.068429 | -0.78845 |
| lnc-ARHGAP15-13:1 | -1.82674 | 3.595972 | -5.55597 | 0.001864 | 0.068474 | -0.78989 |
| lnc-ZC3H8-7:1     | 1.089923 | 6.66708  | 5.555464 | 0.001865 | 0.068479 | -0.79034 |
| ENST00000442328.1 | -1.67701 | 3.150176 | -5.55288 | 0.001869 | 0.068532 | -0.79269 |
| NR_121618         | 1.019913 | 3.357453 | 5.551903 | 0.001871 | 0.068555 | -0.79357 |
| lnc-RBBP6-4:4     | 1.046543 | 3.992155 | 5.55068  | 0.001873 | 0.068555 | -0.79468 |
| lnc-DTL-7:1       | -1.26489 | 3.835987 | -5.54768 | 0.001878 | 0.068555 | -0.79739 |
| NONHSAT215508.1   | 1.003066 | 5.705215 | 5.547425 | 0.001878 | 0.068555 | -0.79762 |
| MSTRG.15343.32    | -1.04362 | 3.629921 | -5.54538 | 0.001881 | 0.068555 | -0.79948 |
| NONHSAT223500.1   | 1.211911 | 3.07086  | 5.538385 | 0.001893 | 0.068555 | -0.80582 |
| NONHSAT163037.1   | 1.720458 | 3.906993 | 5.537713 | 0.001894 | 0.068555 | -0.80643 |
| ENST00000671278.1 | 1.327648 | 6.258146 | 5.537442 | 0.001894 | 0.068555 | -0.80667 |
| lnc-TEX10-4:1     | 1.38296  | 3.24987  | 5.535527 | 0.001897 | 0.068555 | -0.80841 |
| lnc-UBXN4-9:1     | 1.089002 | 6.04666  | 5.535326 | 0.001898 | 0.068555 | -0.80859 |
| NONHSAT176321.1   | 1.274014 | 5.995927 | 5.535176 | 0.001898 | 0.068555 | -0.80873 |
| NONHSAT184942.1   | 1.161798 | 4.96883  | 5.534104 | 0.0019   | 0.068555 | -0.8097  |
| NONHSAT186977.1   | 1.570996 | 5.641415 | 5.532797 | 0.001902 | 0.068555 | -0.81089 |
| NONHSAT179188.1   | 1.241774 | 4.718468 | 5.532377 | 0.001903 | 0.068555 | -0.81127 |
| NONHSAT196039.1   | 1.249046 | 2.042094 | 5.531332 | 0.001904 | 0.068555 | -0.81222 |
| NR_073512         | 1.243654 | 6.932575 | 5.530497 | 0.001906 | 0.068555 | -0.81298 |
| T284818           | 2.020067 | 2.427038 | 5.528673 | 0.001909 | 0.068555 | -0.81463 |
| NONHSAT177938.1   | -1.20808 | 2.107203 | -5.52866 | 0.001909 | 0.068555 | -0.81464 |
| NONHSAT168566.1   | 2.111635 | 6.12662  | 5.528386 | 0.001909 | 0.068555 | -0.8149  |
| NONHSAT216545.1   | 2.306428 | 2.689894 | 5.527877 | 0.00191  | 0.068555 | -0.81536 |
| lnc-TMEM106C-9:1  | -1.66732 | 3.468867 | -5.52786 | 0.00191  | 0.068555 | -0.81537 |
| NONHSAT215659.1   | -1.2856  | 1.88267  | -5.52598 | 0.001913 | 0.068555 | -0.81709 |
| ENST00000567905.1 | -1.60054 | 2.403732 | -5.52554 | 0.001914 | 0.068556 | -0.81748 |
| NR_037839         | 1.556636 | 1.850283 | 5.524104 | 0.001916 | 0.068569 | -0.81879 |
| MSTRG.62727.7     | 1.722997 | 2.899101 | 5.520507 | 0.001922 | 0.068606 | -0.82206 |
| lnc-ZNF737-2:1    | 1.215606 | 1.727938 | 5.519092 | 0.001925 | 0.068606 | -0.82335 |
| MSTRG.57145.1     | -1.76507 | 2.290172 | -5.51909 | 0.001925 | 0.068606 | -0.82335 |
| NONHSAT173891.1   | 2.962982 | 3.800128 | 5.516291 | 0.001929 | 0.068631 | -0.82589 |
| ENST00000605991.1 | -1.4538  | 4.279136 | -5.51558 | 0.001931 | 0.068631 | -0.82654 |
| NONHSAT213694.1   | -1.57299 | 1.956525 | -5.51466 | 0.001932 | 0.068647 | -0.82738 |
| NONHSAT168125.1   | 1.319409 | 1.931151 | 5.513805 | 0.001934 | 0.068665 | -0.82816 |
| MSTRG.7663.8      | 1.552964 | 4.200382 | 5.512268 | 0.001936 | 0.068665 | -0.82956 |
| LINC02447:19      | 1.079962 | 3.997408 | 5.5104   | 0.001939 | 0.068665 | -0.83126 |

|                   |          |          |          |          |          |          |
|-------------------|----------|----------|----------|----------|----------|----------|
| MSTRG.56072.1     | 1.273613 | 4.103899 | 5.509343 | 0.001941 | 0.068692 | -0.83222 |
| NONHSAT190377.1   | 1.043906 | 3.577309 | 5.507005 | 0.001945 | 0.068791 | -0.83435 |
| ENST00000573856.1 | -1.70761 | 2.298809 | -5.50451 | 0.001949 | 0.068893 | -0.83663 |
| NONHSAT220509.1   | -1.37205 | 4.348737 | -5.49655 | 0.001963 | 0.069154 | -0.84389 |
| lnc-CDH6-18:1     | -1.73681 | 2.52751  | -5.49611 | 0.001964 | 0.069156 | -0.84429 |
| NONHSAT205205.1   | 1.479074 | 4.862408 | 5.494898 | 0.001966 | 0.069182 | -0.8454  |
| NONHSAT224156.1   | 1.130856 | 5.124922 | 5.494231 | 0.001967 | 0.069198 | -0.84601 |
| NONHSAT197565.1   | 1.528425 | 1.880364 | 5.488993 | 0.001976 | 0.069323 | -0.85079 |
| lnc-KCNJ10-2:2    | 1.869242 | 2.335676 | 5.488964 | 0.001976 | 0.069323 | -0.85082 |
| NONHSAT190938.1   | -1.05617 | 3.74491  | -5.48751 | 0.001978 | 0.069328 | -0.85215 |
| NONHSAT187187.1   | -1.46204 | 3.36212  | -5.48748 | 0.001978 | 0.069328 | -0.85218 |
| lnc-HAPLN1-2:3    | 1.828642 | 6.317409 | 5.485415 | 0.001982 | 0.069328 | -0.85407 |
| ENST00000319682.2 | 2.025309 | 2.890225 | 5.484402 | 0.001984 | 0.069328 | -0.85499 |
| NR_024366         | 1.083332 | 4.303341 | 5.484303 | 0.001984 | 0.069328 | -0.85508 |
| MSTRG.44943.1     | 1.114175 | 4.178451 | 5.483167 | 0.001986 | 0.069328 | -0.85612 |
| lnc-ALDH3B2-2:1   | -1.2235  | 4.76049  | -5.48314 | 0.001986 | 0.069328 | -0.85615 |
| lnc-SLC12A7-1:1   | 1.117885 | 5.093188 | 5.482767 | 0.001987 | 0.069328 | -0.85649 |
| lnc-TENM1-4:1     | 1.206823 | 1.775556 | 5.480901 | 0.00199  | 0.069328 | -0.8582  |
| lnc-MYH13-2:1     | 1.312842 | 1.73544  | 5.479491 | 0.001992 | 0.069328 | -0.85949 |
| NONHSAT167935.1   | -1.34085 | 3.645774 | -5.47937 | 0.001993 | 0.069328 | -0.8596  |
| lnc-CTBP2-2:1     | -1.54472 | 2.812419 | -5.47668 | 0.001997 | 0.069337 | -0.86206 |
| T009292           | 1.93937  | 2.142989 | 5.476378 | 0.001998 | 0.069337 | -0.86234 |
| MSTRG.13153.1     | 1.937233 | 2.076623 | 5.475698 | 0.001999 | 0.069337 | -0.86296 |
| lnc-RDH13-4:2     | -1.69712 | 2.166167 | -5.47448 | 0.002001 | 0.069337 | -0.86408 |
| DLEU2:45          | -1.02366 | 5.945453 | -5.4741  | 0.002002 | 0.069337 | -0.86443 |
| T047118           | -1.99977 | 2.273644 | -5.4722  | 0.002005 | 0.069357 | -0.86617 |
| lnc-ZFHX2-2:1     | 1.660952 | 1.929625 | 5.471455 | 0.002006 | 0.069362 | -0.86685 |
| NONHSAT165037.1   | -1.51561 | 2.375283 | -5.46899 | 0.002011 | 0.069362 | -0.86911 |
| lnc-SERTAD2-10:1  | -1.51408 | 2.157046 | -5.46777 | 0.002013 | 0.069362 | -0.87022 |
| NONHSAT179012.1   | 1.239016 | 5.160987 | 5.465447 | 0.002017 | 0.069413 | -0.87236 |
| NONHSAT179071.1   | -1.72011 | 2.108781 | -5.46542 | 0.002017 | 0.069413 | -0.87238 |
| NONHSAT191823.1   | -1.17723 | 1.683456 | -5.46484 | 0.002018 | 0.069425 | -0.87292 |
| lnc-TEX264-1:1    | -1.66688 | 2.042981 | -5.46301 | 0.002021 | 0.069431 | -0.87459 |
| lnc-STK25-1:1     | -1.19582 | 4.572315 | -5.46285 | 0.002022 | 0.069431 | -0.87474 |
| NONHSAT180346.1   | 1.202953 | 2.557542 | 5.462035 | 0.002023 | 0.069431 | -0.87549 |
| NONHSAT152602.1   | 1.184496 | 2.990486 | 5.460015 | 0.002027 | 0.069431 | -0.87734 |
| NONHSAT172091.1   | 1.524949 | 5.469832 | 5.459898 | 0.002027 | 0.069431 | -0.87745 |
| lnc-ZBTB39-2:2    | 1.73496  | 2.154104 | 5.458548 | 0.002029 | 0.069431 | -0.87869 |
| NONHSAT177713.1   | 2.121919 | 2.51913  | 5.45827  | 0.00203  | 0.069431 | -0.87894 |
| lnc-PPIAL4G-4:17  | -1.56515 | 3.033064 | -5.45761 | 0.002031 | 0.06944  | -0.87955 |
| lnc-CHIC1-9:1     | 1.849612 | 3.013757 | 5.456511 | 0.002033 | 0.06945  | -0.88056 |
| ENST00000668625.1 | -1.0546  | 1.758218 | -5.45588 | 0.002034 | 0.06945  | -0.88114 |
| lnc-ESM1-5:1      | -2.05187 | 2.496701 | -5.45393 | 0.002037 | 0.06945  | -0.88293 |
| lnc-ZFAND5-2:1    | 2.224027 | 2.438394 | 5.452944 | 0.002039 | 0.06945  | -0.88384 |
| MSTRG.60986.1     | 1.884921 | 4.051672 | 5.4525   | 0.00204  | 0.06945  | -0.88425 |
| lnc-ZNF66-3:1     | 1.46658  | 3.010569 | 5.452414 | 0.00204  | 0.06945  | -0.88433 |
| lnc-KLRB1-12:8    | -1.43603 | 3.251249 | -5.45149 | 0.002042 | 0.06945  | -0.88517 |
| lnc-THYN1-5:1     | 1.014107 | 6.149449 | 5.451346 | 0.002042 | 0.06945  | -0.88531 |

|                   |          |          |          |          |          |          |
|-------------------|----------|----------|----------|----------|----------|----------|
| NONHSAT167081.1   | 1.527896 | 3.360786 | 5.451185 | 0.002042 | 0.06945  | -0.88546 |
| ENST00000436500.1 | 1.363588 | 5.590285 | 5.45059  | 0.002043 | 0.06945  | -0.886   |
| ENST00000668466.1 | -1.50332 | 2.758882 | -5.4505  | 0.002044 | 0.06945  | -0.88608 |
| lnc-LRCH1-9:1     | 1.643832 | 1.8991   | 5.449395 | 0.002046 | 0.069471 | -0.8871  |
| lnc-SLC25A35-2:1  | -1.31638 | 4.462978 | -5.44807 | 0.002048 | 0.069481 | -0.88832 |
| NONHSAT169812.1   | -1.19098 | 6.005096 | -5.44613 | 0.002051 | 0.069537 | -0.89011 |
| ENST00000555771.2 | -1.16372 | 2.937398 | -5.44491 | 0.002054 | 0.069569 | -0.89122 |
| ENST00000455848.1 | 1.283336 | 3.393621 | 5.444723 | 0.002054 | 0.069569 | -0.8914  |
| ENST00000557965.1 | -1.36978 | 2.308701 | -5.44325 | 0.002057 | 0.069636 | -0.89276 |
| ENST00000421851.1 | -1.2565  | 3.452106 | -5.44047 | 0.002062 | 0.069696 | -0.89532 |
| MSTRG.47961.1     | -1.31504 | 3.816089 | -5.4402  | 0.002062 | 0.069696 | -0.89556 |
| NONHSAT156709.1   | 1.641993 | 2.363246 | 5.43922  | 0.002064 | 0.069696 | -0.89647 |
| NONHSAT206835.1   | 1.237679 | 4.528331 | 5.439217 | 0.002064 | 0.069696 | -0.89647 |
| lnc-C14orf119-1:1 | -1.16528 | 3.787053 | -5.43811 | 0.002066 | 0.069717 | -0.89749 |
| NONHSAT187701.1   | 1.064424 | 1.730615 | 5.435967 | 0.00207  | 0.069736 | -0.89946 |
| ENST00000654444.1 | -1.61905 | 4.041972 | -5.4359  | 0.00207  | 0.069736 | -0.89953 |
| T239450           | -1.5997  | 3.338849 | -5.43382 | 0.002074 | 0.069839 | -0.90145 |
| NONHSAT210848.1   | 1.435627 | 2.04902  | 5.433456 | 0.002074 | 0.069839 | -0.90178 |
| lnc-ACMSD-3:1     | -1.29601 | 1.833528 | -5.43097 | 0.002079 | 0.069889 | -0.90407 |
| NR_110782         | -1.17871 | 3.942306 | -5.43027 | 0.00208  | 0.069889 | -0.90472 |
| lnc-FKBP5-1:2     | 1.209628 | 6.249867 | 5.429997 | 0.002081 | 0.069889 | -0.90497 |
| NONHSAT185026.1   | 1.677584 | 2.418176 | 5.428931 | 0.002083 | 0.069931 | -0.90595 |
| lnc-POMGNT1-2:1   | 1.680516 | 2.19796  | 5.423497 | 0.002093 | 0.069992 | -0.91097 |
| ENST00000450669.2 | 1.501629 | 1.803048 | 5.423164 | 0.002093 | 0.069992 | -0.91127 |
| lnc-CYBB-2:1      | 1.344215 | 4.211776 | 5.421193 | 0.002097 | 0.069992 | -0.91309 |
| ENST00000671681.1 | 1.140335 | 3.414826 | 5.421007 | 0.002097 | 0.069992 | -0.91327 |
| MSTRG.53632.17    | 1.885343 | 2.444396 | 5.420319 | 0.002099 | 0.069992 | -0.9139  |
| NONHSAT149293.1   | 1.16771  | 1.692104 | 5.420297 | 0.002099 | 0.069992 | -0.91392 |
| NONHSAT221753.1   | 1.762855 | 2.01116  | 5.420034 | 0.002099 | 0.069992 | -0.91416 |
| NONHSAT156287.1   | 1.557853 | 1.885098 | 5.418454 | 0.002102 | 0.07002  | -0.91562 |
| NONHSAT187468.1   | 1.317774 | 1.723476 | 5.41744  | 0.002104 | 0.070059 | -0.91656 |
| NONHSAT201104.1   | 1.863612 | 2.823067 | 5.416222 | 0.002106 | 0.070059 | -0.91769 |
| NONHSAT211192.1   | 1.075437 | 4.339545 | 5.415945 | 0.002107 | 0.070059 | -0.91794 |
| MSTRG.26213.1     | 1.818131 | 2.670033 | 5.41549  | 0.002108 | 0.070059 | -0.91836 |
| lnc-POTEB2-5:1    | -1.26477 | 3.552888 | -5.41483 | 0.002109 | 0.070059 | -0.91898 |
| NONHSAT189471.1   | 1.598773 | 1.840303 | 5.412396 | 0.002113 | 0.070113 | -0.92123 |
| NONHSAT198215.1   | -1.07827 | 3.544624 | -5.41182 | 0.002114 | 0.070113 | -0.92176 |
| NONHSAT182503.1   | 1.092128 | 1.605239 | 5.411526 | 0.002115 | 0.070113 | -0.92203 |
| NONHSAT212214.1   | 1.260142 | 7.266318 | 5.411333 | 0.002115 | 0.070113 | -0.92221 |
| MSTRG.40860.1     | 1.065438 | 4.87146  | 5.411159 | 0.002116 | 0.070113 | -0.92237 |
| MSTRG.42739.1     | -1.39865 | 2.600494 | -5.41059 | 0.002117 | 0.070114 | -0.9229  |
| MSTRG.49439.7     | 1.371541 | 3.282135 | 5.410157 | 0.002117 | 0.070117 | -0.9233  |
| MSTRG.43258.1     | 1.034798 | 4.202853 | 5.409497 | 0.002119 | 0.070135 | -0.92391 |
| lnc-RWDD4-5:1     | 1.62009  | 1.881734 | 5.406172 | 0.002125 | 0.070285 | -0.92698 |
| NONHSAT191743.1   | 2.09572  | 3.615095 | 5.406121 | 0.002125 | 0.070285 | -0.92703 |
| ENST00000550135.5 | -1.46061 | 3.306672 | -5.40495 | 0.002127 | 0.070316 | -0.92811 |
| lnc-SGCA-4:2      | -1.04027 | 2.25174  | -5.40435 | 0.002128 | 0.070316 | -0.92867 |
| lnc-ZFAT-11:1     | -1.04082 | 2.241459 | -5.40256 | 0.002132 | 0.070358 | -0.93033 |

|                   |          |          |          |          |          |          |
|-------------------|----------|----------|----------|----------|----------|----------|
| NONHSAT202365.1   | 1.209315 | 5.848947 | 5.395721 | 0.002145 | 0.070542 | -0.93667 |
| lnc-CYP4F22-5:1   | -1.06356 | 6.4468   | -5.3957  | 0.002145 | 0.070542 | -0.93668 |
| MSTRG.42808.1     | -1.89809 | 2.838003 | -5.39554 | 0.002145 | 0.070542 | -0.93683 |
| ENST00000657877.1 | 1.23893  | 1.672429 | 5.39429  | 0.002147 | 0.070597 | -0.938   |
| lnc-ZSCAN20-1:1   | -1.04972 | 3.845688 | -5.39346 | 0.002149 | 0.070615 | -0.93877 |
| NONHSAT186585.1   | 1.336079 | 6.907034 | 5.391769 | 0.002152 | 0.070671 | -0.94033 |
| NR_110840         | 1.157832 | 6.652268 | 5.391629 | 0.002152 | 0.070671 | -0.94046 |
| T204260           | 1.366961 | 3.22338  | 5.390601 | 0.002154 | 0.070707 | -0.94142 |
| MSTRG.13601.1     | 1.988599 | 5.171138 | 5.389136 | 0.002157 | 0.070707 | -0.94278 |
| MSTRG.62672.1     | 1.006683 | 5.268968 | 5.388832 | 0.002158 | 0.070707 | -0.94306 |
| MSTRG.25954.1     | -1.1586  | 4.729587 | -5.38865 | 0.002158 | 0.070707 | -0.94323 |
| NONHSAT197451.1   | 1.178096 | 1.705671 | 5.388477 | 0.002158 | 0.070707 | -0.94339 |
| lnc-POLR1D-1:2    | -1.33549 | 2.082759 | -5.38534 | 0.002164 | 0.070808 | -0.9463  |
| NONHSAT167452.1   | 1.628933 | 3.102659 | 5.385153 | 0.002165 | 0.070808 | -0.94648 |
| lnc-HAO2-7:1      | 1.444257 | 3.263219 | 5.382666 | 0.00217  | 0.070808 | -0.94879 |
| NONHSAT197461.1   | 1.220997 | 1.884263 | 5.382459 | 0.00217  | 0.070808 | -0.94898 |
| NONHSAT152445.1   | 2.071869 | 2.508585 | 5.381361 | 0.002172 | 0.070808 | -0.95    |
| lnc-C12orf40-2:1  | 1.073577 | 5.934736 | 5.381121 | 0.002173 | 0.070808 | -0.95022 |
| NONHSAT156234.1   | 1.012612 | 5.907754 | 5.38023  | 0.002174 | 0.070808 | -0.95105 |
| lnc-PMP22-4:1     | 1.350122 | 5.370982 | 5.380219 | 0.002174 | 0.070808 | -0.95106 |
| lnc-LLPH-6:1      | -1.04205 | 5.142409 | -5.38021 | 0.002174 | 0.070808 | -0.95107 |
| MSTRG.37935.1     | 1.49241  | 4.107694 | 5.378225 | 0.002178 | 0.070823 | -0.95291 |
| MSTRG.17336.1     | -1.05755 | 2.33693  | -5.37652 | 0.002181 | 0.070907 | -0.9545  |
| NONHSAT191694.1   | 1.222074 | 3.225683 | 5.374859 | 0.002185 | 0.070989 | -0.95604 |
| MSTRG.25713.4     | -1.11225 | 4.240495 | -5.37301 | 0.002188 | 0.071013 | -0.95776 |
| NONHSAT219661.1   | -1.15908 | 8.954959 | -5.37263 | 0.002189 | 0.071013 | -0.95812 |
| lnc-FARSB-7:1     | -1.93632 | 2.551424 | -5.36979 | 0.002194 | 0.071013 | -0.96076 |
| NONHSAT205149.1   | 1.415788 | 3.104163 | 5.369669 | 0.002195 | 0.071013 | -0.96087 |
| lnc-TTC21B-2:4    | -1.43233 | 3.986838 | -5.36957 | 0.002195 | 0.071013 | -0.96097 |
| NONHSAT158549.1   | -1.02499 | 3.927137 | -5.36547 | 0.002203 | 0.071013 | -0.96478 |
| NONHSAT200276.1   | -2.00116 | 3.767584 | -5.36526 | 0.002203 | 0.071013 | -0.96498 |
| MSTRG.20182.1     | 1.356069 | 5.280527 | 5.364842 | 0.002204 | 0.071013 | -0.96537 |
| lnc-POU4F3-3:1    | -1.07208 | 4.617007 | -5.36468 | 0.002204 | 0.071013 | -0.96552 |
| lnc-PROSER1-2:1   | -1.18361 | 3.110691 | -5.36421 | 0.002205 | 0.071013 | -0.96596 |
| lnc-MYOT-1:1      | 1.533249 | 2.084212 | 5.363151 | 0.002207 | 0.071013 | -0.96695 |
| MSTRG.28257.1     | 1.396845 | 7.578189 | 5.362919 | 0.002208 | 0.071013 | -0.96716 |
| NONHSAT206201.1   | 1.167664 | 5.127254 | 5.360348 | 0.002213 | 0.071059 | -0.96956 |
| lnc-KLHL31-10:1   | 1.600741 | 3.241912 | 5.357537 | 0.002218 | 0.071136 | -0.97218 |
| lnc-PATJ-2:1      | -1.51034 | 5.759551 | -5.35739 | 0.002219 | 0.071136 | -0.97232 |
| NONHSAT149315.1   | -1.11946 | 3.58018  | -5.3555  | 0.002223 | 0.07114  | -0.97408 |
| NONHSAT197590.1   | 1.011229 | 8.212559 | 5.354819 | 0.002224 | 0.07114  | -0.97472 |
| lnc-ALB-7:1       | -1.78738 | 3.075145 | -5.35336 | 0.002227 | 0.071142 | -0.97608 |
| ENST00000420867.1 | 1.825721 | 3.115332 | 5.351867 | 0.00223  | 0.071168 | -0.97747 |
| NONHSAT172704.1   | -1.0042  | 4.052349 | -5.35139 | 0.002231 | 0.071168 | -0.97791 |
| NONHSAT171316.1   | 1.167005 | 3.067175 | 5.350067 | 0.002233 | 0.071169 | -0.97915 |
| NONHSAT208849.1   | 1.393097 | 5.636644 | 5.349517 | 0.002234 | 0.071169 | -0.97967 |
| NONHSAT157193.1   | 1.460199 | 1.793478 | 5.349385 | 0.002235 | 0.071169 | -0.97979 |
| NR_110039         | 1.337828 | 4.508802 | 5.346521 | 0.00224  | 0.071197 | -0.98246 |



|                    |          |          |          |          |          |          |
|--------------------|----------|----------|----------|----------|----------|----------|
| ENST00000651492.1  | 1.036225 | 4.421793 | 5.34563  | 0.002242 | 0.071197 | -0.9833  |
| lnc-IGIP-2:2       | -1.1884  | 4.028887 | -5.34552 | 0.002242 | 0.071197 | -0.9834  |
| ENST00000623971.3  | 1.781051 | 2.580381 | 5.343542 | 0.002246 | 0.071225 | -0.98525 |
| NONHSAT158029.1    | 1.253404 | 3.864006 | 5.343078 | 0.002247 | 0.071229 | -0.98568 |
| NONHSAT157172.1    | 1.327169 | 4.208934 | 5.342771 | 0.002248 | 0.071229 | -0.98597 |
| NONHSAT188971.1    | -1.20722 | 1.75848  | -5.34109 | 0.002251 | 0.071286 | -0.98754 |
| MSTRG.23307.2      | 1.436886 | 3.482792 | 5.340809 | 0.002252 | 0.071286 | -0.9878  |
| NONHSAT184723.1    | 1.558463 | 2.888527 | 5.340257 | 0.002253 | 0.071295 | -0.98832 |
| lnc-ANKRD30BL-10:1 | 1.153567 | 1.675274 | 5.338379 | 0.002257 | 0.071329 | -0.99008 |
| lnc-UHRF1BP1L-4:1  | 1.432393 | 2.032094 | 5.337381 | 0.002259 | 0.07137  | -0.99101 |
| lnc-ATP6V1E2-10:4  | 1.390767 | 4.413165 | 5.334005 | 0.002265 | 0.071428 | -0.99417 |
| lnc-TMED10-1:1     | -1.87605 | 3.52859  | -5.33254 | 0.002268 | 0.071455 | -0.99554 |
| NONHSAT185726.1    | -1.03755 | 1.616704 | -5.33104 | 0.002271 | 0.071511 | -0.99695 |
| lnc-CNOT6-6:1      | -1.80957 | 2.769466 | -5.33015 | 0.002273 | 0.071511 | -0.99778 |
| lnc-CDH10-11:1     | -1.89182 | 3.551845 | -5.32919 | 0.002275 | 0.071512 | -0.99868 |
| lnc-VIT-3:1        | -1.02526 | 11.32181 | -5.32662 | 0.00228  | 0.071521 | -1.00109 |
| NONHSAT160182.1    | 1.26015  | 3.184377 | 5.326178 | 0.002281 | 0.071521 | -1.0015  |
| ENST00000454234.1  | 1.262684 | 3.51843  | 5.322889 | 0.002288 | 0.071581 | -1.00459 |
| lnc-HBEGF-2:8      | 2.479981 | 3.62353  | 5.321286 | 0.002291 | 0.071607 | -1.00609 |
| T265427            | 1.40625  | 2.006741 | 5.32101  | 0.002292 | 0.071607 | -1.00635 |
| lnc-ZEB2-1:14      | -1.08068 | 8.833715 | -5.32074 | 0.002292 | 0.071607 | -1.0066  |
| lnc-GADD45B-1:1    | 1.72435  | 2.441577 | 5.317287 | 0.0023   | 0.071719 | -1.00984 |
| lnc-ALG10B-3:2     | 2.422927 | 2.927926 | 5.315139 | 0.002304 | 0.071833 | -1.01186 |
| lnc-NUDCD1-1:1     | -1.19479 | 5.853053 | -5.31443 | 0.002305 | 0.071856 | -1.01252 |
| ENST00000523279.1  | 1.83547  | 5.285513 | 5.31174  | 0.002311 | 0.071941 | -1.01505 |
| MSTRG.57243.4      | 1.590069 | 3.091176 | 5.309749 | 0.002315 | 0.072024 | -1.01692 |
| ENST00000607953.1  | -1.20525 | 5.12849  | -5.30651 | 0.002322 | 0.072071 | -1.01996 |
| NONHSAT218260.1    | 1.44077  | 2.371826 | 5.304798 | 0.002325 | 0.072071 | -1.02157 |
| lnc-ZSCAN5B-2:1    | -1.27033 | 2.074234 | -5.30456 | 0.002326 | 0.072071 | -1.0218  |
| lnc-FCRLB-3:1      | -1.33998 | 3.487613 | -5.30323 | 0.002329 | 0.072112 | -1.02305 |
| lnc-TMEM232-2:1    | 1.624985 | 2.153849 | 5.296786 | 0.002342 | 0.072344 | -1.02911 |
| T006588            | -1.17925 | 2.483699 | -5.29656 | 0.002343 | 0.072344 | -1.02933 |
| NONHSAT190273.1    | 1.684213 | 2.361218 | 5.295813 | 0.002344 | 0.072348 | -1.03003 |
| T262074            | 1.855956 | 3.490245 | 5.295428 | 0.002345 | 0.072351 | -1.03039 |
| lnc-ZMAT3-5:1      | -1.95885 | 3.595078 | -5.29504 | 0.002346 | 0.072354 | -1.03075 |
| NONHSAT198574.1    | -1.0683  | 5.580983 | -5.29463 | 0.002347 | 0.072359 | -1.03115 |
| MSTRG.64748.4      | -1.25208 | 3.30142  | -5.29325 | 0.00235  | 0.072362 | -1.03244 |
| lnc-NPTX1-2:8      | -1.26471 | 3.054982 | -5.29318 | 0.00235  | 0.072362 | -1.03251 |
| ENST00000528607.1  | -1.53114 | 2.65849  | -5.29193 | 0.002352 | 0.072369 | -1.03369 |
| NONHSAT167524.1    | -1.22932 | 2.111291 | -5.28822 | 0.00236  | 0.072413 | -1.03718 |
| ENST00000451929.1  | 1.542051 | 2.50155  | 5.286469 | 0.002364 | 0.072466 | -1.03883 |
| NONHSAT212981.1    | 1.089209 | 1.639585 | 5.285427 | 0.002366 | 0.072466 | -1.03982 |
| MSTRG.45749.1      | 1.137807 | 3.453764 | 5.285149 | 0.002367 | 0.072466 | -1.04008 |
| ENST00000504735.1  | 1.008739 | 1.60038  | 5.284415 | 0.002368 | 0.072466 | -1.04077 |
| NONHSAT215235.1    | 1.374522 | 6.614903 | 5.284108 | 0.002369 | 0.072466 | -1.04106 |
| NONHSAT178914.1    | 1.612194 | 4.001314 | 5.280979 | 0.002376 | 0.072542 | -1.04401 |
| NONHSAT171956.1    | -2.27879 | 3.481912 | -5.28071 | 0.002376 | 0.072542 | -1.04427 |
| NONHSAT218909.1    | 2.322422 | 5.062798 | 5.280582 | 0.002376 | 0.072542 | -1.04439 |

|                   |          |          |          |          |          |          |
|-------------------|----------|----------|----------|----------|----------|----------|
| ENST00000558429.1 | -1.90071 | 3.009656 | -5.28046 | 0.002377 | 0.072542 | -1.0445  |
| ENST00000606959.1 | -1.7364  | 2.978009 | -5.27986 | 0.002378 | 0.072542 | -1.04507 |
| NONHSAT185733.1   | -1.19724 | 1.89059  | -5.27961 | 0.002378 | 0.072542 | -1.04531 |
| lnc-C12orf40-5:1  | -1.2385  | 2.970877 | -5.27832 | 0.002381 | 0.072548 | -1.04653 |
| NONHSAT207738.1   | -1.21984 | 2.152127 | -5.27802 | 0.002382 | 0.072548 | -1.04681 |
| T081667           | 2.129425 | 2.079464 | 5.277619 | 0.002383 | 0.072548 | -1.04719 |
| MSTRG.52173.1     | -1.05446 | 1.633336 | -5.2775  | 0.002383 | 0.072548 | -1.0473  |
| lnc-ZNF730-2:1    | 2.227424 | 2.347872 | 5.276604 | 0.002385 | 0.072584 | -1.04815 |
| NONHSAT194468.1   | 1.328185 | 4.183577 | 5.274471 | 0.002389 | 0.072615 | -1.05016 |
| lnc-NDE1-1:3      | -1.2983  | 3.390337 | -5.27379 | 0.002391 | 0.072615 | -1.0508  |
| lnc-PKDCC-1:1     | 1.506201 | 2.153666 | 5.271787 | 0.002395 | 0.072622 | -1.0527  |
| MSTRG.62453.1     | 1.0666   | 7.256615 | 5.271671 | 0.002395 | 0.072622 | -1.05281 |
| NONHSAT156527.1   | 1.154833 | 5.415408 | 5.268255 | 0.002403 | 0.072629 | -1.05604 |
| lnc-PCDH20-15:1   | 1.268437 | 3.421911 | 5.267067 | 0.002405 | 0.072629 | -1.05716 |
| lnc-TRMT2A-3:1    | -1.60397 | 3.289717 | -5.26595 | 0.002408 | 0.072629 | -1.05822 |
| NONHSAT170895.1   | -1.22118 | 5.506798 | -5.26567 | 0.002408 | 0.072629 | -1.05848 |
| NONHSAT189577.1   | 1.600902 | 3.534304 | 5.264637 | 0.002411 | 0.072629 | -1.05946 |
| lnc-CWF19L2-2:1   | -1.02383 | 4.250671 | -5.26304 | 0.002414 | 0.072629 | -1.06097 |
| NONHSAT155028.1   | 1.292404 | 4.93764  | 5.262986 | 0.002414 | 0.072629 | -1.06102 |
| NONHSAT193057.1   | -1.07846 | 5.6767   | -5.26293 | 0.002414 | 0.072629 | -1.06107 |
| MSTRG.12580.1     | -1.64541 | 2.087146 | -5.26204 | 0.002416 | 0.072629 | -1.06191 |
| MSTRG.47035.1     | -1.26763 | 1.885148 | -5.2609  | 0.002419 | 0.072629 | -1.063   |
| NONHSAT196564.1   | 1.004898 | 4.785159 | 5.260573 | 0.00242  | 0.072629 | -1.0633  |
| lnc-FAM174B-1:5   | -1.65704 | 2.828988 | -5.25926 | 0.002422 | 0.072629 | -1.06455 |
| NONHSAT179981.1   | 1.478674 | 2.024374 | 5.259092 | 0.002423 | 0.072629 | -1.06471 |
| ENST00000561486.1 | -1.97825 | 2.640283 | -5.25831 | 0.002424 | 0.072629 | -1.06544 |
| lnc-MED14-8:1     | -1.12876 | 4.924833 | -5.25813 | 0.002425 | 0.072629 | -1.06562 |
| NONHSAT187141.1   | 1.758741 | 4.003419 | 5.257777 | 0.002426 | 0.072629 | -1.06595 |
| lnc-SHC3-8:2      | 1.059629 | 3.730893 | 5.257622 | 0.002426 | 0.072629 | -1.0661  |
| lnc-TTC37-4:2     | -1.30904 | 4.28987  | -5.2555  | 0.002431 | 0.072704 | -1.06811 |
| LINC00477:3       | 1.10509  | 4.762297 | 5.255143 | 0.002431 | 0.072705 | -1.06845 |
| lnc-LHFPL4-4:1    | 1.014754 | 3.744087 | 5.25385  | 0.002434 | 0.072768 | -1.06967 |
| NONHSAT200446.1   | 1.920069 | 2.445335 | 5.25163  | 0.002439 | 0.072871 | -1.07178 |
| lnc-TIMM21-5:10   | 1.319307 | 2.03122  | 5.249819 | 0.002443 | 0.072968 | -1.07349 |
| ENST00000658651.1 | -1.20042 | 2.445669 | -5.2492  | 0.002444 | 0.072976 | -1.07408 |
| ENST00000421965.1 | -1.2409  | 3.133724 | -5.24515 | 0.002453 | 0.073028 | -1.07793 |
| lnc-SLC9A3R1-2:2  | 1.232844 | 8.92614  | 5.244693 | 0.002454 | 0.073028 | -1.07836 |
| lnc-GABPA-14:1    | -1.0025  | 6.451322 | -5.24376 | 0.002456 | 0.073028 | -1.07924 |
| lnc-CHRD1-3:1     | -1.75433 | 3.091258 | -5.24374 | 0.002457 | 0.073028 | -1.07927 |
| MSTRG.58649.5     | -1.00939 | 5.354253 | -5.24335 | 0.002457 | 0.073028 | -1.07963 |
| NONHSAT170185.1   | 1.060941 | 5.326387 | 5.242546 | 0.002459 | 0.073059 | -1.0804  |
| NONHSAT220183.1   | 1.861292 | 2.437993 | 5.2406   | 0.002464 | 0.073074 | -1.08224 |
| lnc-COL28A1-1:18  | 1.513305 | 2.417958 | 5.238277 | 0.002469 | 0.073074 | -1.08445 |
| MSTRG.50749.2     | 1.538646 | 2.166574 | 5.238082 | 0.002469 | 0.073074 | -1.08464 |
| T035724           | -1.23547 | 1.88934  | -5.23687 | 0.002472 | 0.073096 | -1.08578 |
| lnc-GGTLC2-5:1    | 1.738805 | 2.500899 | 5.235871 | 0.002474 | 0.073096 | -1.08674 |
| lnc-LRR1-9:1      | -1.22963 | 2.527432 | -5.23541 | 0.002475 | 0.073096 | -1.08718 |
| lnc-ETV5-2:1      | 1.219124 | 6.405489 | 5.234185 | 0.002478 | 0.073096 | -1.08834 |

|                   |          |          |          |          |          |          |
|-------------------|----------|----------|----------|----------|----------|----------|
| NONHSAT159015.1   | -1.29084 | 2.673125 | -5.23294 | 0.002481 | 0.073115 | -1.08953 |
| NONHSAT182960.1   | 1.078336 | 1.588944 | 5.230441 | 0.002486 | 0.073198 | -1.0919  |
| MSTRG.60069.4     | 1.341048 | 4.285036 | 5.229734 | 0.002488 | 0.073198 | -1.09257 |
| NONHSAT224166.1   | 1.372041 | 3.690844 | 5.227201 | 0.002494 | 0.073249 | -1.09498 |
| T231552           | 1.048091 | 7.749944 | 5.227178 | 0.002494 | 0.073249 | -1.095   |
| MSTRG.33988.1     | 1.831849 | 2.393966 | 5.227005 | 0.002494 | 0.073249 | -1.09517 |
| NR_002950         | -1.40661 | 6.151251 | -5.2267  | 0.002495 | 0.073249 | -1.09546 |
| NONHSAT214429.1   | 1.07784  | 5.987084 | 5.225248 | 0.002498 | 0.073303 | -1.09684 |
| lnc-TGFBR2-3:3    | 1.265951 | 3.620896 | 5.223123 | 0.002503 | 0.07338  | -1.09886 |
| lnc-FAM43A-12:1   | 1.588046 | 4.38957  | 5.222399 | 0.002504 | 0.073388 | -1.09955 |
| lnc-DIP2B-1:1     | -1.86033 | 2.48539  | -5.22236 | 0.002504 | 0.073388 | -1.09959 |
| NONHSAT172975.1   | -1.22485 | 2.303081 | -5.21903 | 0.002512 | 0.073482 | -1.10276 |
| lnc-PKD2L1-1:3    | 1.187901 | 4.399174 | 5.217585 | 0.002515 | 0.073523 | -1.10414 |
| MSTRG.35845.53    | -1.70026 | 2.803331 | -5.21751 | 0.002516 | 0.073523 | -1.10421 |
| MSTRG.28178.1     | 1.818035 | 3.793029 | 5.213677 | 0.002524 | 0.073647 | -1.10787 |
| lnc-ANGPT4-1:1    | 1.2478   | 4.247341 | 5.212344 | 0.002527 | 0.073672 | -1.10914 |
| NONHSAT224461.1   | -1.35021 | 1.77696  | -5.21097 | 0.00253  | 0.073705 | -1.11045 |
| NONHSAT196155.1   | 2.538194 | 2.780639 | 5.210657 | 0.002531 | 0.073705 | -1.11075 |
| NONHSAT211129.1   | 1.26747  | 3.605606 | 5.210417 | 0.002532 | 0.073705 | -1.11098 |
| lnc-MNX1-6:1      | -1.16664 | 3.094703 | -5.21025 | 0.002532 | 0.073705 | -1.11114 |
| ENST00000598116.1 | 1.019817 | 2.993062 | 5.208274 | 0.002537 | 0.073782 | -1.11302 |
| NONHSAT210678.1   | -1.61994 | 3.295351 | -5.20782 | 0.002538 | 0.073783 | -1.11345 |
| lnc-TOP2B-5:1     | -1.24449 | 4.780215 | -5.20618 | 0.002541 | 0.073829 | -1.11502 |
| MSTRG.21380.10    | -1.62086 | 5.904168 | -5.20442 | 0.002546 | 0.073841 | -1.1167  |
| T069672           | 1.058395 | 4.316002 | 5.203462 | 0.002548 | 0.073883 | -1.11762 |
| lnc-ASPH-4:2      | 1.960511 | 5.750025 | 5.20254  | 0.00255  | 0.073924 | -1.1185  |
| NONHSAT157234.1   | 1.595632 | 2.669032 | 5.201411 | 0.002552 | 0.073939 | -1.11958 |
| ENST00000664643.1 | 1.199809 | 3.022364 | 5.201159 | 0.002553 | 0.073939 | -1.11982 |
| NONHSAT219233.1   | 1.242937 | 5.067866 | 5.200626 | 0.002554 | 0.073939 | -1.12033 |
| lnc-LRP12-10:1    | -1.54362 | 1.855452 | -5.20048 | 0.002555 | 0.073939 | -1.12047 |
| NONHSAT162834.1   | 1.457924 | 1.813329 | 5.200039 | 0.002556 | 0.073939 | -1.12089 |
| NONHSAT149319.1   | -1.61858 | 3.502423 | -5.19978 | 0.002556 | 0.073939 | -1.12114 |
| lnc-CYP7B1-7:1    | 1.043772 | 5.494751 | 5.198074 | 0.00256  | 0.073948 | -1.12276 |
| MSTRG.54805.1     | 1.689049 | 2.220814 | 5.195624 | 0.002566 | 0.074058 | -1.12511 |
| lnc-LY6E-2:2      | -1.07262 | 5.412761 | -5.19422 | 0.002569 | 0.074068 | -1.12645 |
| lnc-KLF12-5:1     | -1.92937 | 3.296461 | -5.19099 | 0.002577 | 0.074068 | -1.12954 |
| lnc-ANKRD42-5:1   | -1.51938 | 4.716404 | -5.18953 | 0.00258  | 0.074068 | -1.13094 |
| NONHSAT161601.1   | 1.94104  | 4.260673 | 5.189485 | 0.00258  | 0.074068 | -1.13098 |
| NONHSAT153736.1   | 1.122463 | 1.654189 | 5.188384 | 0.002583 | 0.074068 | -1.13203 |
| lnc-PTPN13-2:1    | -1.58954 | 4.134387 | -5.18816 | 0.002583 | 0.074068 | -1.13225 |
| NONHSAT161637.1   | 1.318534 | 1.764997 | 5.185647 | 0.002589 | 0.074068 | -1.13466 |
| ENST00000657349.1 | 1.567516 | 2.685299 | 5.1854   | 0.00259  | 0.074068 | -1.13489 |
| lnc-OR6B1-1:1     | 1.93627  | 2.826981 | 5.185088 | 0.002591 | 0.074068 | -1.13519 |
| NONHSAT215444.1   | 1.877526 | 4.208444 | 5.18229  | 0.002597 | 0.074089 | -1.13787 |
| NR_110036         | 1.473214 | 2.132161 | 5.181588 | 0.002599 | 0.074089 | -1.13854 |
| lnc-CCR7-2:1      | 1.226882 | 1.883901 | 5.180528 | 0.002601 | 0.074097 | -1.13956 |
| NONHSAT154946.1   | 2.031588 | 2.421341 | 5.177713 | 0.002608 | 0.074138 | -1.14226 |
| NONHSAT160754.1   | -1.09426 | 2.34074  | -5.17685 | 0.00261  | 0.074138 | -1.14308 |

|                   |          |          |          |          |          |          |
|-------------------|----------|----------|----------|----------|----------|----------|
| MSTRG.40553.1     | 1.040493 | 3.967716 | 5.17662  | 0.002611 | 0.074138 | -1.14331 |
| lnc-RCBTB1-2:1    | -1.4284  | 4.321184 | -5.17632 | 0.002611 | 0.074138 | -1.14359 |
| NONHSAT205781.1   | 1.822655 | 2.997019 | 5.174618 | 0.002615 | 0.074183 | -1.14523 |
| NONHSAT177004.1   | 1.785384 | 4.377352 | 5.173754 | 0.002618 | 0.074183 | -1.14606 |
| MSTRG.18807.6     | 1.105439 | 5.947712 | 5.173382 | 0.002618 | 0.074183 | -1.14641 |
| ENST00000657738.1 | -1.37293 | 4.548631 | -5.17273 | 0.00262  | 0.074184 | -1.14704 |
| lnc-ZNF648-6:1    | 1.246459 | 2.650602 | 5.171922 | 0.002622 | 0.074184 | -1.14782 |
| NR_110139         | 1.296885 | 4.391853 | 5.169388 | 0.002628 | 0.074194 | -1.15025 |
| NONHSAT221630.1   | 1.417355 | 1.75903  | 5.166276 | 0.002635 | 0.074289 | -1.15324 |
| lnc-LRRC49-16:1   | -1.61339 | 2.154649 | -5.16485 | 0.002639 | 0.074318 | -1.15461 |
| ENST00000513041.1 | 1.077702 | 9.055863 | 5.164623 | 0.002639 | 0.074318 | -1.15483 |
| BANCR:2           | -1.35224 | 2.220108 | -5.1617  | 0.002646 | 0.074363 | -1.15764 |
| lnc-OR6A2-1:1     | -1.10107 | 4.753472 | -5.16061 | 0.002649 | 0.074363 | -1.15869 |
| NONHSAT176818.1   | 1.057169 | 4.57932  | 5.159758 | 0.002651 | 0.074363 | -1.1595  |
| lnc-IL22-1:3      | -1.1488  | 4.390858 | -5.15938 | 0.002652 | 0.074363 | -1.15986 |
| NONHSAT158651.1   | 1.300516 | 1.751503 | 5.157627 | 0.002656 | 0.074391 | -1.16155 |
| lnc-PMAIP1-8:1    | 1.57052  | 3.82318  | 5.15743  | 0.002657 | 0.074391 | -1.16174 |
| ENST00000435832.1 | 2.060379 | 2.499753 | 5.156048 | 0.00266  | 0.074391 | -1.16307 |
| lnc-BRF1-47:1     | -1.41306 | 1.811089 | -5.15398 | 0.002665 | 0.074391 | -1.16506 |
| MSTRG.16968.1     | 1.193213 | 2.00472  | 5.153804 | 0.002666 | 0.074391 | -1.16523 |
| NONHSAT185509.1   | -1.27399 | 1.731304 | -5.15191 | 0.00267  | 0.074428 | -1.16706 |
| T281976           | 1.173912 | 4.622567 | 5.150785 | 0.002673 | 0.074428 | -1.16814 |
| MSTRG.39508.1     | 1.03749  | 5.319536 | 5.149187 | 0.002677 | 0.074428 | -1.16967 |
| lnc-MGARP-1:2     | -1.17931 | 6.371954 | -5.14759 | 0.002681 | 0.074428 | -1.17121 |
| lnc-CHRNA10-2:1   | -1.00864 | 5.143162 | -5.14745 | 0.002681 | 0.074428 | -1.17135 |
| ENST00000651844.1 | -1.11646 | 2.739438 | -5.14688 | 0.002683 | 0.074428 | -1.1719  |
| NONHSAT221241.1   | 1.573621 | 2.353656 | 5.146378 | 0.002684 | 0.074428 | -1.17238 |
| lnc-EML4-10:1     | 1.076603 | 3.471193 | 5.146288 | 0.002684 | 0.074428 | -1.17247 |
| NONHSAT205548.1   | 1.548286 | 1.881876 | 5.14504  | 0.002687 | 0.074434 | -1.17367 |
| NONHSAT167523.1   | -1.1269  | 2.015671 | -5.14504 | 0.002687 | 0.074434 | -1.17367 |
| MSTRG.19911.1     | -1.26734 | 2.825517 | -5.14221 | 0.002694 | 0.074545 | -1.1764  |
| lnc-MYCT1-1:1     | 1.01845  | 1.556245 | 5.13884  | 0.002702 | 0.074655 | -1.17965 |
| NONHSAT209233.1   | 2.097561 | 2.586424 | 5.133271 | 0.002716 | 0.074892 | -1.18502 |
| NONHSAT175052.1   | -1.00044 | 4.056947 | -5.13318 | 0.002716 | 0.074892 | -1.18511 |
| ENST00000658548.1 | 1.884452 | 7.122717 | 5.132005 | 0.002719 | 0.074892 | -1.18625 |
| MSTRG.61863.1     | 1.156611 | 1.658856 | 5.131929 | 0.00272  | 0.074892 | -1.18632 |
| lnc-CCT5-8:1      | 1.866734 | 3.255301 | 5.131182 | 0.002721 | 0.074892 | -1.18704 |
| ENST00000437621.6 | 1.2212   | 5.638095 | 5.127967 | 0.002729 | 0.074957 | -1.19015 |
| ENST00000655281.1 | 1.507838 | 5.841286 | 5.127782 | 0.00273  | 0.074957 | -1.19033 |
| lnc-GRHL2-8:3     | 1.28623  | 8.415763 | 5.127542 | 0.00273  | 0.074957 | -1.19056 |
| MSTRG.28406.1     | 1.045858 | 2.749855 | 5.126261 | 0.002734 | 0.074972 | -1.1918  |
| lnc-ANTXR2-1:5    | 1.551752 | 2.201159 | 5.125167 | 0.002736 | 0.074972 | -1.19285 |
| ENST00000603160.5 | -1.48796 | 3.438491 | -5.12503 | 0.002737 | 0.074972 | -1.19299 |
| NONHSAT192342.1   | 2.040877 | 2.845434 | 5.124651 | 0.002738 | 0.074972 | -1.19335 |
| ENST00000649638.1 | 1.328359 | 1.743656 | 5.12068  | 0.002748 | 0.075103 | -1.19719 |
| NONHSAT209176.1   | 1.468391 | 1.944729 | 5.119115 | 0.002752 | 0.075128 | -1.19871 |
| NONHSAT190525.1   | -1.17433 | 1.949662 | -5.11883 | 0.002752 | 0.075128 | -1.19899 |
| MSTRG.7329.1      | -2.47049 | 3.071023 | -5.11855 | 0.002753 | 0.075128 | -1.19926 |

|                   |          |          |          |          |          |          |
|-------------------|----------|----------|----------|----------|----------|----------|
| NONHSAT209959.1   | 1.352553 | 6.733649 | 5.116116 | 0.002759 | 0.075176 | -1.20161 |
| NONHSAT170668.1   | -1.13425 | 5.129356 | -5.11589 | 0.00276  | 0.075176 | -1.20183 |
| ENST00000541892.1 | -1.72897 | 2.516511 | -5.11487 | 0.002762 | 0.075176 | -1.20281 |
| NONHSAT170265.1   | 1.71804  | 2.481951 | 5.114323 | 0.002764 | 0.075176 | -1.20335 |
| NONHSAT218255.1   | -1.27279 | 2.001699 | -5.1132  | 0.002767 | 0.075205 | -1.20444 |
| lnc-ISG20L2-1:1   | -1.7453  | 3.214414 | -5.11315 | 0.002767 | 0.075205 | -1.20448 |
| NONHSAT196366.1   | 1.174693 | 4.689501 | 5.112706 | 0.002768 | 0.075207 | -1.20491 |
| NONHSAT214440.1   | 1.367226 | 1.879906 | 5.112012 | 0.00277  | 0.075212 | -1.20558 |
| ENST00000648995.1 | -1.33987 | 2.697824 | -5.11132 | 0.002771 | 0.075212 | -1.20625 |
| lnc-IL13RA2-7:1   | -1.29174 | 1.964366 | -5.10854 | 0.002779 | 0.075259 | -1.20895 |
| NONHSAT206246.1   | -1.20823 | 1.710857 | -5.10708 | 0.002782 | 0.075291 | -1.21036 |
| MSTRG.5963.1      | 1.748166 | 2.654888 | 5.106733 | 0.002783 | 0.075291 | -1.2107  |
| NONHSAT180349.1   | -1.09353 | 1.636301 | -5.10651 | 0.002784 | 0.075291 | -1.21092 |
| NONHSAT207712.1   | 1.083467 | 4.950808 | 5.104646 | 0.002789 | 0.075293 | -1.21272 |
| MSTRG.2479.1      | 1.882648 | 3.22068  | 5.103733 | 0.002791 | 0.075293 | -1.21361 |
| lnc-CCNH-6:1      | -1.47239 | 3.359066 | -5.10243 | 0.002794 | 0.075293 | -1.21488 |
| MSTRG.30374.1     | 1.232389 | 1.962099 | 5.102401 | 0.002794 | 0.075293 | -1.2149  |
| lnc-MANEA-6:1     | 1.561316 | 4.019856 | 5.102084 | 0.002795 | 0.075293 | -1.21521 |
| NONHSAT186409.1   | -1.57405 | 2.081012 | -5.10089 | 0.002798 | 0.075318 | -1.21637 |
| T138549           | 2.21113  | 3.249416 | 5.099801 | 0.002801 | 0.075353 | -1.21742 |
| ENST00000435271.1 | -1.17075 | 4.983095 | -5.09925 | 0.002802 | 0.075371 | -1.21796 |
| ENST00000448901.1 | 1.252433 | 1.695561 | 5.097579 | 0.002807 | 0.075407 | -1.21958 |
| NONHSAT184089.1   | 1.392881 | 3.535299 | 5.097144 | 0.002808 | 0.075417 | -1.22    |
| NONHSAT212180.1   | -1.14782 | 3.560771 | -5.09646 | 0.00281  | 0.075444 | -1.22067 |
| lnc-SIMC1-5:1     | 1.163895 | 4.854149 | 5.096069 | 0.002811 | 0.075452 | -1.22105 |
| NONHSAT154238.1   | 1.440469 | 2.930413 | 5.094191 | 0.002815 | 0.075481 | -1.22287 |
| NONHSAT198374.1   | 2.081724 | 2.14889  | 5.09355  | 0.002817 | 0.075481 | -1.22349 |
| NONHSAT210318.1   | 2.226662 | 3.164563 | 5.093324 | 0.002818 | 0.075481 | -1.22371 |
| lnc-SLC35F5-4:1   | 1.342301 | 5.746686 | 5.092614 | 0.00282  | 0.075481 | -1.2244  |
| NONHSAT209939.1   | -1.10273 | 6.243183 | -5.09099 | 0.002824 | 0.075481 | -1.22598 |
| NONHSAT179207.1   | 1.646181 | 5.753693 | 5.09067  | 0.002825 | 0.075481 | -1.22629 |
| LINC01782:9       | 1.46094  | 2.765476 | 5.090209 | 0.002826 | 0.075481 | -1.22674 |
| lnc-ANKRD60-1:3   | 2.280826 | 2.705135 | 5.090109 | 0.002826 | 0.075481 | -1.22684 |
| ENST00000434296.2 | -1.6823  | 3.980772 | -5.08912 | 0.002829 | 0.075508 | -1.22779 |
| NONHSAT153494.1   | 1.013117 | 3.61078  | 5.085096 | 0.002839 | 0.075695 | -1.23171 |
| lnc-LRMP-4:1      | 1.038782 | 7.126684 | 5.084068 | 0.002842 | 0.075705 | -1.23271 |
| lnc-CHRM5-4:1     | 1.533983 | 2.344601 | 5.082988 | 0.002845 | 0.075707 | -1.23376 |
| lnc-ZNF469-3:1    | 1.782106 | 4.066757 | 5.081485 | 0.002849 | 0.075707 | -1.23523 |
| NONHSAT161596.1   | 1.39041  | 1.778597 | 5.080322 | 0.002852 | 0.075707 | -1.23636 |
| NONHSAT167892.1   | 1.647346 | 3.100163 | 5.079972 | 0.002853 | 0.075707 | -1.2367  |
| NONHSAT197871.1   | 1.157644 | 2.500462 | 5.078549 | 0.002856 | 0.075707 | -1.23808 |
| NONHSAT196083.1   | 1.150009 | 1.619221 | 5.076184 | 0.002863 | 0.075752 | -1.24039 |
| lnc-NPBWR1-12:3   | -1.25506 | 2.196147 | -5.07477 | 0.002866 | 0.075781 | -1.24177 |
| lnc-SPATA16-5:1   | -1.12528 | 3.744136 | -5.07175 | 0.002874 | 0.075781 | -1.2447  |
| T017018           | 1.69377  | 2.494724 | 5.071416 | 0.002875 | 0.075781 | -1.24503 |
| lnc-IL17D-3:1     | 1.021477 | 5.772279 | 5.071395 | 0.002875 | 0.075781 | -1.24505 |
| SNHG17:24         | -1.56388 | 3.088725 | -5.07033 | 0.002878 | 0.075781 | -1.24609 |
| lnc-SERHL2-1:6    | -1.37173 | 3.829393 | -5.07017 | 0.002879 | 0.075781 | -1.24625 |

|                   |          |          |          |          |          |          |
|-------------------|----------|----------|----------|----------|----------|----------|
| ENST00000587011.1 | -1.17686 | 2.204917 | -5.07001 | 0.002879 | 0.075781 | -1.2464  |
| NONHSAT155289.1   | 1.355379 | 3.932457 | 5.06887  | 0.002882 | 0.075817 | -1.24752 |
| NONHSAT210011.1   | 1.421722 | 2.224494 | 5.067207 | 0.002886 | 0.075863 | -1.24914 |
| ENST00000483218.1 | -1.62553 | 3.945337 | -5.06547 | 0.002891 | 0.075863 | -1.25083 |
| NONHSAT178451.1   | 1.23738  | 2.043394 | 5.065361 | 0.002891 | 0.075863 | -1.25094 |
| NONHSAT151645.1   | 1.129095 | 2.261645 | 5.063489 | 0.002896 | 0.075943 | -1.25277 |
| NONHSAT166413.1   | -1.01837 | 4.495346 | -5.06299 | 0.002898 | 0.075943 | -1.25326 |
| lnc-ZNF708-8:1    | 1.398973 | 3.506979 | 5.062816 | 0.002898 | 0.075943 | -1.25342 |
| ENST00000660486.1 | -2.39078 | 3.387132 | -5.06218 | 0.0029   | 0.075949 | -1.25404 |
| NONHSAT222504.1   | 1.8708   | 3.784345 | 5.059896 | 0.002906 | 0.07605  | -1.25627 |
| NONHSAT161485.1   | 1.402739 | 3.528138 | 5.057992 | 0.002911 | 0.076105 | -1.25813 |
| NONHSAT172148.1   | 1.568084 | 4.251411 | 5.04911  | 0.002935 | 0.076452 | -1.26681 |
| MSTRG.2664.1      | -1.1362  | 3.283097 | -5.04781 | 0.002939 | 0.076484 | -1.26809 |
| NONHSAT224004.1   | -1.32784 | 1.896075 | -5.04604 | 0.002944 | 0.076484 | -1.26982 |
| ENST00000668332.1 | -1.07042 | 1.656437 | -5.04535 | 0.002946 | 0.076484 | -1.2705  |
| NONHSAT215405.1   | -1.43903 | 4.322542 | -5.04519 | 0.002946 | 0.076484 | -1.27065 |
| NONHSAT193103.1   | 1.189615 | 4.463535 | 5.044618 | 0.002947 | 0.076484 | -1.27121 |
| ENST00000613652.1 | -1.28517 | 4.743419 | -5.04283 | 0.002952 | 0.076535 | -1.27296 |
| NONHSAT167880.1   | 1.431181 | 3.48333  | 5.04248  | 0.002953 | 0.076535 | -1.2733  |
| lnc-MPZL3-2:1     | -1.16809 | 5.274406 | -5.04226 | 0.002954 | 0.076535 | -1.27352 |
| MSTRG.62298.4     | 1.489589 | 9.409909 | 5.038733 | 0.002964 | 0.076577 | -1.27697 |
| NONHSAT211759.1   | 1.960377 | 4.195678 | 5.03852  | 0.002964 | 0.076577 | -1.27718 |
| lnc-ETV5-1:1      | 1.037627 | 4.671096 | 5.038512 | 0.002964 | 0.076577 | -1.27719 |
| NONHSAT204799.1   | 2.084567 | 3.205938 | 5.038117 | 0.002965 | 0.076577 | -1.27758 |
| ENST00000504874.1 | -1.61202 | 2.333416 | -5.03558 | 0.002972 | 0.076585 | -1.28006 |
| MSTRG.2427.1      | -1.41917 | 3.010272 | -5.03535 | 0.002973 | 0.076585 | -1.28029 |
| lnc-FOXG1-20:1    | 1.53083  | 2.748658 | 5.03495  | 0.002974 | 0.076585 | -1.28068 |
| lnc-IRF8-1:2      | 1.190758 | 9.039412 | 5.03452  | 0.002975 | 0.076585 | -1.2811  |
| lnc-MCFD2-3:1     | -1.09914 | 2.090515 | -5.03353 | 0.002978 | 0.076585 | -1.28207 |
| lnc-SEC24C-7:1    | -1.81436 | 3.522766 | -5.03276 | 0.00298  | 0.076585 | -1.28282 |
| NONHSAT178104.1   | 1.378182 | 5.090809 | 5.032595 | 0.002981 | 0.076585 | -1.28299 |
| T061741           | -1.75715 | 2.505673 | -5.03172 | 0.002983 | 0.076585 | -1.28384 |
| lnc-GIMAP5-2:1    | -1.69116 | 5.772695 | -5.03135 | 0.002984 | 0.076585 | -1.28421 |
| NONHSAT213914.1   | 1.191187 | 3.901291 | 5.031114 | 0.002985 | 0.076585 | -1.28444 |
| MSTRG.42064.1     | 1.406891 | 3.367515 | 5.029097 | 0.00299  | 0.076662 | -1.28642 |
| ENST00000657713.1 | -1.21211 | 3.120291 | -5.0275  | 0.002995 | 0.076691 | -1.28798 |
| lnc-ALB-3:1       | -1.53357 | 4.625289 | -5.02735 | 0.002995 | 0.076691 | -1.28813 |
| NR_038965         | 1.047271 | 5.67279  | 5.027126 | 0.002996 | 0.076691 | -1.28835 |
| NONHSAT166899.1   | 1.827154 | 2.154565 | 5.027065 | 0.002996 | 0.076691 | -1.28841 |
| NONHSAT178948.1   | 1.631896 | 8.029268 | 5.026518 | 0.002997 | 0.07671  | -1.28895 |
| ENST00000657048.1 | -1.89245 | 3.028337 | -5.02542 | 0.003001 | 0.076722 | -1.29003 |
| lnc-OR9Q1-1:1     | -1.61626 | 2.982217 | -5.02445 | 0.003003 | 0.076722 | -1.29098 |
| lnc-PEPD-2:1      | 1.69094  | 2.308425 | 5.02444  | 0.003003 | 0.076722 | -1.29099 |
| lnc-PXDN-9:2      | 1.107873 | 3.331049 | 5.022746 | 0.003008 | 0.076734 | -1.29265 |
| ENST00000655813.1 | -1.22847 | 4.191468 | -5.02183 | 0.003011 | 0.076734 | -1.29356 |
| lnc-GRIK2-2:11    | 1.194331 | 3.535777 | 5.021086 | 0.003013 | 0.076734 | -1.29428 |
| lnc-SPANXB1-7:7   | 1.039271 | 4.943596 | 5.020437 | 0.003014 | 0.076734 | -1.29492 |
| ENST00000671641.1 | -1.1729  | 4.746251 | -5.02042 | 0.003015 | 0.076734 | -1.29494 |

|                   |          |          |          |          |          |          |
|-------------------|----------|----------|----------|----------|----------|----------|
| ENST00000515522.1 | 2.899727 | 3.352488 | 5.020198 | 0.003015 | 0.076734 | -1.29516 |
| lnc-ARID1B-5:1    | -1.31416 | 4.16891  | -5.01861 | 0.00302  | 0.076828 | -1.29672 |
| PDZRN3-AS1:8      | 1.297755 | 2.568091 | 5.017788 | 0.003022 | 0.076867 | -1.29752 |
| ENST00000670510.1 | 2.015868 | 2.497905 | 5.017135 | 0.003024 | 0.076895 | -1.29817 |
| NONHSAT206827.1   | 1.354613 | 7.333978 | 5.015968 | 0.003027 | 0.076944 | -1.29931 |
| MSTRG.11503.1     | 1.314811 | 2.208138 | 5.015903 | 0.003027 | 0.076944 | -1.29938 |
| lnc-C11orf91-4:1  | 2.429966 | 2.341727 | 5.014277 | 0.003032 | 0.076982 | -1.30098 |
| NONHSAT210699.1   | 1.500951 | 2.204915 | 5.014254 | 0.003032 | 0.076982 | -1.301   |
| lnc-SUPT6H-5:2    | -1.64746 | 2.458232 | -5.01409 | 0.003032 | 0.076982 | -1.30116 |
| ENST00000606809.1 | 1.069658 | 2.392427 | 5.014025 | 0.003033 | 0.076982 | -1.30122 |
| lnc-CSMD1-11:1    | 1.266906 | 3.9882   | 5.012801 | 0.003036 | 0.07705  | -1.30243 |
| lnc-PATE4-1:1     | 2.35276  | 2.739689 | 5.011715 | 0.003039 | 0.077089 | -1.3035  |
| lnc-HSFY1-4:1     | -1.34476 | 2.7933   | -5.00953 | 0.003045 | 0.077227 | -1.30564 |
| MSTRG.59825.1     | 2.195169 | 4.367116 | 5.006868 | 0.003053 | 0.077347 | -1.30827 |
| lnc-ECI2-11:1     | -1.36281 | 3.274538 | -5.00652 | 0.003054 | 0.077347 | -1.30861 |
| NONHSAT165224.1   | -1.17999 | 2.299039 | -5.00524 | 0.003057 | 0.077359 | -1.30987 |
| NONHSAT166245.1   | 1.34851  | 1.926739 | 5.003477 | 0.003062 | 0.077359 | -1.31161 |
| lnc-FAM53A-1:4    | 1.33646  | 4.834536 | 5.003152 | 0.003063 | 0.077359 | -1.31193 |
| ENST00000668417.1 | -1.43209 | 3.414452 | -5.00306 | 0.003064 | 0.077359 | -1.31202 |
| lnc-PLA1A-1:1     | -1.02173 | 2.329316 | -5.00254 | 0.003065 | 0.077359 | -1.31253 |
| lnc-CCNL1-5:1     | -1.04764 | 6.759109 | -5.00007 | 0.003072 | 0.077359 | -1.31496 |
| lnc-ENKUR-5:1     | 1.804215 | 1.93064  | 4.999938 | 0.003073 | 0.077359 | -1.31509 |
| lnc-SLC25A51-3:2  | -1.25074 | 2.067957 | -4.99977 | 0.003073 | 0.077359 | -1.31526 |
| lnc-SLC35G4-3:2   | 2.220455 | 3.116542 | 4.999591 | 0.003074 | 0.077359 | -1.31543 |
| lnc-EDDM13-1:2    | 1.649082 | 2.210775 | 4.999431 | 0.003074 | 0.077359 | -1.31559 |
| NONHSAT154407.1   | 2.115447 | 6.94986  | 4.997808 | 0.003079 | 0.077381 | -1.31719 |
| lnc-FBXO30-2:1    | -1.08676 | 4.782496 | -4.99773 | 0.003079 | 0.077381 | -1.31727 |
| ENST00000472514.1 | -1.15651 | 1.914999 | -4.99699 | 0.003081 | 0.077416 | -1.318   |
| lnc-PDE4D-4:1     | -1.54463 | 3.978722 | -4.99645 | 0.003083 | 0.077429 | -1.31853 |
| MSTRG.43658.5     | 2.005806 | 3.01036  | 4.995997 | 0.003084 | 0.077429 | -1.31898 |
| ENST00000592016.1 | -1.00856 | 4.073068 | -4.9946  | 0.003088 | 0.077474 | -1.32036 |
| NONHSAT200657.1   | 1.004145 | 4.722406 | 4.993302 | 0.003092 | 0.077528 | -1.32164 |
| ENST00000602618.1 | -1.02395 | 4.514892 | -4.99216 | 0.003095 | 0.077569 | -1.32277 |
| lnc-LYZL1-9:1     | -1.03505 | 4.397669 | -4.98974 | 0.003102 | 0.077632 | -1.32515 |
| lnc-C5orf46-1:1   | -1.71016 | 2.476593 | -4.98804 | 0.003107 | 0.07766  | -1.32683 |
| ENST00000653821.1 | 1.360376 | 4.13632  | 4.988039 | 0.003107 | 0.07766  | -1.32683 |
| ENST00000583067.1 | -1.02046 | 5.708197 | -4.98795 | 0.003107 | 0.07766  | -1.32692 |
| NONHSAT197136.1   | -1.36421 | 2.567639 | -4.98702 | 0.00311  | 0.077694 | -1.32783 |
| NONHSAT162078.1   | 1.023995 | 3.926114 | 4.986764 | 0.003111 | 0.077694 | -1.32809 |
| NONHSAT218131.1   | 2.384102 | 3.019388 | 4.985312 | 0.003115 | 0.077777 | -1.32952 |
| NONHSAT223999.1   | 1.867111 | 3.313475 | 4.984354 | 0.003118 | 0.077811 | -1.33047 |
| MSTRG.52068.11    | -1.2051  | 1.895717 | -4.98233 | 0.003124 | 0.077844 | -1.33247 |
| NR_015446         | 1.405289 | 5.506865 | 4.982317 | 0.003124 | 0.077844 | -1.33248 |
| lnc-DERA-6:1      | -1.012   | 5.008321 | -4.98132 | 0.003127 | 0.077853 | -1.33347 |
| NONHSAT194526.1   | 1.554633 | 6.599123 | 4.97976  | 0.003131 | 0.077915 | -1.33501 |
| lnc-GPR39-2:6     | 1.187072 | 3.221591 | 4.978551 | 0.003135 | 0.077966 | -1.3362  |
| NONHSAT161335.1   | -1.54557 | 1.856435 | -4.97651 | 0.003141 | 0.077979 | -1.33822 |
| ENST00000625026.1 | -1.71098 | 2.59957  | -4.975   | 0.003145 | 0.078004 | -1.33972 |

|                   |          |          |          |          |          |          |
|-------------------|----------|----------|----------|----------|----------|----------|
| NONHSAT164022.1   | 1.238459 | 4.343915 | 4.974329 | 0.003147 | 0.078004 | -1.34038 |
| ENST00000524017.1 | -1.24186 | 4.161102 | -4.97169 | 0.003155 | 0.078098 | -1.34299 |
| lnc-SNX14-6:1     | -1.29688 | 6.56201  | -4.97157 | 0.003155 | 0.078098 | -1.34312 |
| lnc-ENPP6-3:1     | -1.304   | 2.458232 | -4.97065 | 0.003158 | 0.078103 | -1.34402 |
| MSTRG.65187.1     | -1.24534 | 5.249539 | -4.96969 | 0.003161 | 0.078103 | -1.34498 |
| NONHSAT172727.1   | 1.795455 | 4.962494 | 4.969312 | 0.003162 | 0.078103 | -1.34535 |
| MSTRG.66845.1     | -1.91627 | 3.012531 | -4.9646  | 0.003176 | 0.078235 | -1.35001 |
| lnc-PDGFB-2:5     | -1.48332 | 4.59795  | -4.96446 | 0.003176 | 0.078235 | -1.35015 |
| LINC01239:6       | 1.599876 | 4.134261 | 4.964352 | 0.003177 | 0.078235 | -1.35026 |
| ENST00000607861.1 | -1.20684 | 4.404285 | -4.96285 | 0.003181 | 0.078235 | -1.35175 |
| NONHSAT202743.1   | -1.75256 | 1.990792 | -4.9628  | 0.003181 | 0.078235 | -1.3518  |
| MSTRG.65216.1     | -1.80746 | 2.628899 | -4.96257 | 0.003182 | 0.078235 | -1.35203 |
| MSTRG.65081.1     | 1.171935 | 6.15547  | 4.962557 | 0.003182 | 0.078235 | -1.35204 |
| lnc-GFPT1-2:1     | 1.758349 | 2.817136 | 4.9609   | 0.003187 | 0.07829  | -1.35368 |
| MSTRG.35445.1     | -1.29709 | 4.306143 | -4.9567  | 0.0032   | 0.078323 | -1.35785 |
| ENST00000657889.1 | 1.254774 | 3.567448 | 4.956372 | 0.003201 | 0.078323 | -1.35817 |
| NONHSAT161086.1   | -1.55789 | 2.678122 | -4.95573 | 0.003202 | 0.078323 | -1.35881 |
| ENST00000629214.1 | 1.830355 | 2.730738 | 4.954536 | 0.003206 | 0.078323 | -1.35999 |
| lnc-ADCY8-3:1     | 1.881789 | 3.994079 | 4.953426 | 0.003209 | 0.078323 | -1.3611  |
| lnc-THSD7A-8:1    | -1.77845 | 2.719413 | -4.95297 | 0.003211 | 0.078323 | -1.36155 |
| lnc-TXNDC12-3:1   | -1.18253 | 4.983448 | -4.95242 | 0.003212 | 0.078323 | -1.36209 |
| NONHSAT190089.1   | 1.03366  | 4.910331 | 4.951679 | 0.003215 | 0.078323 | -1.36283 |
| T359291           | -1.66265 | 2.080604 | -4.95087 | 0.003217 | 0.078323 | -1.36363 |
| NONHSAT188004.1   | -1.62638 | 3.214115 | -4.95078 | 0.003217 | 0.078323 | -1.36372 |
| NONHSAT181534.1   | -1.09466 | 1.762848 | -4.95003 | 0.00322  | 0.078323 | -1.36447 |
| ENST00000524252.1 | -1.27567 | 4.315303 | -4.94917 | 0.003222 | 0.078323 | -1.36533 |
| NONHSAT157332.1   | 1.686944 | 3.115472 | 4.948962 | 0.003223 | 0.078323 | -1.36553 |
| NONHSAT158307.1   | 2.394907 | 3.055252 | 4.948341 | 0.003225 | 0.078323 | -1.36615 |
| lnc-GEMIN8-2:1    | 1.030925 | 4.134752 | 4.948269 | 0.003225 | 0.078323 | -1.36622 |
| lnc-HS6ST3-3:1    | 1.64035  | 3.055454 | 4.947895 | 0.003226 | 0.078323 | -1.36659 |
| lnc-OLFM1-2:1     | 1.437019 | 1.742553 | 4.947645 | 0.003227 | 0.078323 | -1.36684 |
| NONHSAT188144.1   | 2.529162 | 3.527319 | 4.946649 | 0.00323  | 0.078323 | -1.36783 |
| MSTRG.52995.1     | -1.285   | 1.853847 | -4.94621 | 0.003231 | 0.078323 | -1.36827 |
| NONHSAT153470.1   | 1.095568 | 5.08671  | 4.946158 | 0.003231 | 0.078323 | -1.36831 |
| T064777           | 1.302552 | 4.903746 | 4.945939 | 0.003232 | 0.078323 | -1.36853 |
| ENST00000427471.1 | -1.67717 | 2.245945 | -4.94541 | 0.003234 | 0.078323 | -1.36906 |
| NONHSAT214949.1   | 1.227931 | 3.862433 | 4.945288 | 0.003234 | 0.078323 | -1.36918 |
| NONHSAT174543.1   | -1.60491 | 2.790739 | -4.94513 | 0.003234 | 0.078323 | -1.36933 |
| lnc-METTL14-1:3   | 1.015784 | 1.777962 | 4.943823 | 0.003238 | 0.078345 | -1.37064 |
| ENST00000664348.1 | 1.454346 | 3.426498 | 4.943491 | 0.003239 | 0.078348 | -1.37097 |
| lnc-PLEKHG7-7:2   | 1.094209 | 4.003155 | 4.940345 | 0.003249 | 0.078499 | -1.37409 |
| lnc-EXOC2-188:2   | 1.234019 | 4.105541 | 4.940201 | 0.00325  | 0.078499 | -1.37424 |
| MSTRG.48172.1     | 1.027897 | 5.032118 | 4.937373 | 0.003258 | 0.078614 | -1.37705 |
| NONHSAT201797.1   | 2.153016 | 3.014659 | 4.93588  | 0.003263 | 0.078696 | -1.37854 |
| MSTRG.38157.1     | 1.956372 | 2.501306 | 4.935541 | 0.003264 | 0.078696 | -1.37887 |
| lnc-CHIC1-8:1     | -1.83128 | 3.664181 | -4.93549 | 0.003264 | 0.078696 | -1.37892 |
| NONHSAT155238.1   | 1.377093 | 2.073199 | 4.93429  | 0.003268 | 0.07873  | -1.38012 |
| ENST00000421411.1 | 1.382121 | 4.860431 | 4.933598 | 0.00327  | 0.078743 | -1.38081 |



|                    |          |          |          |          |          |          |
|--------------------|----------|----------|----------|----------|----------|----------|
| NONHSAT222723.1    | -1.00697 | 5.883825 | -4.93041 | 0.00328  | 0.078835 | -1.38399 |
| lnc-ITGA6-3:1      | 2.833204 | 5.494449 | 4.93013  | 0.00328  | 0.078835 | -1.38426 |
| T203331            | 1.50536  | 1.870183 | 4.92951  | 0.003282 | 0.078835 | -1.38488 |
| MSTRG.3006.1       | 1.523213 | 1.962483 | 4.929384 | 0.003283 | 0.078835 | -1.38501 |
| LINC01128:89       | -1.01139 | 4.001146 | -4.92932 | 0.003283 | 0.078835 | -1.38507 |
| ENST00000596563.5  | 1.03156  | 3.27386  | 4.927536 | 0.003289 | 0.07888  | -1.38685 |
| ENST00000517623.1  | 1.195353 | 2.013041 | 4.926817 | 0.003291 | 0.078887 | -1.38756 |
| lnc-FGD4-1:1       | -1.03654 | 4.462595 | -4.92635 | 0.003292 | 0.078887 | -1.38803 |
| ENST00000666326.1  | -1.74054 | 3.109996 | -4.92578 | 0.003294 | 0.078892 | -1.3886  |
| ENST00000543475.1  | -1.09887 | 1.870845 | -4.92534 | 0.003295 | 0.078892 | -1.38904 |
| NONHSAT170356.1    | -1.14671 | 1.957199 | -4.92296 | 0.003303 | 0.078936 | -1.39141 |
| NONHSAT168808.1    | 1.794376 | 2.713419 | 4.9227   | 0.003304 | 0.078936 | -1.39167 |
| NR_110225          | -1.41465 | 3.808853 | -4.9226  | 0.003304 | 0.078936 | -1.39177 |
| ENST00000657719.1  | 1.159058 | 3.66265  | 4.921847 | 0.003306 | 0.078936 | -1.39252 |
| MSTRG.31439.1      | 1.384737 | 4.73729  | 4.920424 | 0.003311 | 0.078952 | -1.39394 |
| ENST00000521572.1  | 1.257543 | 2.542853 | 4.917747 | 0.003319 | 0.079041 | -1.39661 |
| lnc-CSPG5-1:1      | -1.30644 | 3.371357 | -4.91573 | 0.003325 | 0.079084 | -1.39862 |
| NONHSAT152483.1    | 1.067521 | 5.580595 | 4.912983 | 0.003334 | 0.079211 | -1.40137 |
| MSTRG.14624.1      | 1.547214 | 1.977313 | 4.910777 | 0.003341 | 0.079283 | -1.40357 |
| lnc-CDH12-5:1      | 1.245199 | 1.65678  | 4.909815 | 0.003344 | 0.079299 | -1.40453 |
| lnc-ACMSD-6:1      | -1.78018 | 4.581437 | -4.90611 | 0.003356 | 0.079456 | -1.40824 |
| ENST00000657024.1  | 1.584903 | 2.19882  | 4.905983 | 0.003356 | 0.079456 | -1.40836 |
| NONHSAT215714.1    | 1.393107 | 3.923287 | 4.90523  | 0.003359 | 0.079486 | -1.40911 |
| lnc-TUBGCP3-6:4    | 1.050992 | 7.274616 | 4.904771 | 0.00336  | 0.079486 | -1.40957 |
| MSTRG.70008.1      | -1.05181 | 4.806513 | -4.90433 | 0.003361 | 0.079486 | -1.41001 |
| ENST00000500381.2  | -1.241   | 1.814634 | -4.90412 | 0.003362 | 0.079486 | -1.41022 |
| lnc-DIRAS3-2:1     | -1.03013 | 5.418632 | -4.90327 | 0.003365 | 0.079507 | -1.41108 |
| NONHSAT169362.1    | 1.422275 | 10.76161 | 4.899768 | 0.003376 | 0.079606 | -1.41458 |
| NONHSAT192777.1    | 1.078722 | 1.75811  | 4.897836 | 0.003382 | 0.079696 | -1.41651 |
| lnc-IFT80-3:1      | 1.932763 | 3.019842 | 4.897192 | 0.003384 | 0.079726 | -1.41716 |
| NONHSAT199442.1    | -1.12951 | 1.899464 | -4.89683 | 0.003385 | 0.079735 | -1.41752 |
| ENST00000435984.1  | 1.269068 | 1.745827 | 4.89476  | 0.003392 | 0.079765 | -1.41959 |
| ENST00000549373.1  | -1.09637 | 7.609791 | -4.89472 | 0.003392 | 0.079765 | -1.41963 |
| ENST00000420268.1  | -1.53513 | 2.981199 | -4.89443 | 0.003393 | 0.079765 | -1.41992 |
| lnc-ANKRD20A2-19:1 | -1.14974 | 4.810158 | -4.89421 | 0.003394 | 0.079765 | -1.42014 |
| lnc-ZNF395-2:4     | -1.40855 | 6.390385 | -4.89363 | 0.003396 | 0.079782 | -1.42072 |
| lnc-TEX15-1:3      | -2.17698 | 3.527348 | -4.89277 | 0.003398 | 0.079782 | -1.42159 |
| ENST00000638795.1  | -1.18539 | 2.12621  | -4.89253 | 0.003399 | 0.079782 | -1.42182 |
| MSTRG.4181.1       | -2.26336 | 2.25549  | -4.89109 | 0.003404 | 0.079848 | -1.42327 |
| lnc-PTPN23-2:1     | 1.588057 | 1.83844  | 4.88981  | 0.003408 | 0.079878 | -1.42455 |
| MSTRG.37026.1      | -1.03396 | 4.402563 | -4.88928 | 0.00341  | 0.079878 | -1.42508 |
| NONHSAT201690.1    | -1.79272 | 2.824833 | -4.8887  | 0.003411 | 0.079903 | -1.42566 |
| LINC01638:16       | 2.025929 | 3.467438 | 4.888299 | 0.003413 | 0.079915 | -1.42607 |
| lnc-CLDN16-7:1     | -1.7874  | 6.777002 | -4.88751 | 0.003415 | 0.079938 | -1.42685 |
| ENST00000649562.1  | 1.412243 | 2.071724 | 4.886531 | 0.003419 | 0.079956 | -1.42784 |
| NONHSAT224060.1    | 1.779681 | 3.789111 | 4.885741 | 0.003421 | 0.079998 | -1.42863 |
| ENST00000668426.1  | -1.26015 | 2.306327 | -4.88337 | 0.003429 | 0.080104 | -1.43101 |
| ENST00000539305.1  | 1.263991 | 5.441673 | 4.883269 | 0.003429 | 0.080104 | -1.43111 |

|                   |          |          |          |          |          |          |
|-------------------|----------|----------|----------|----------|----------|----------|
| NONHSAT190244.1   | -1.07137 | 4.661744 | -4.88309 | 0.00343  | 0.080104 | -1.43129 |
| lnc-MZT2A-1:1     | -1.18161 | 4.47376  | -4.88216 | 0.003433 | 0.080121 | -1.43222 |
| NONHSAT158372.1   | 1.229478 | 6.173581 | 4.878816 | 0.003444 | 0.080175 | -1.43558 |
| NONHSAT189657.1   | 1.101863 | 3.056593 | 4.878345 | 0.003445 | 0.080175 | -1.43605 |
| lnc-PDHA1-3:1     | 1.056634 | 4.611896 | 4.878283 | 0.003445 | 0.080175 | -1.43612 |
| MSTRG.60057.2     | 2.263393 | 2.991886 | 4.877997 | 0.003446 | 0.080178 | -1.4364  |
| NONHSAT206436.1   | 1.593403 | 2.932847 | 4.876757 | 0.00345  | 0.080214 | -1.43765 |
| NONHSAT218967.1   | 1.298357 | 3.891788 | 4.876036 | 0.003453 | 0.080226 | -1.43837 |
| NONHSAT190308.1   | 1.411089 | 2.119842 | 4.875366 | 0.003455 | 0.080249 | -1.43905 |
| lnc-RIPPLY3-3:1   | 1.324872 | 1.771561 | 4.873401 | 0.003461 | 0.080308 | -1.44102 |
| lnc-COG6-5:1      | 2.276809 | 3.31052  | 4.872259 | 0.003465 | 0.080324 | -1.44217 |
| MSTRG.35265.1     | 1.608405 | 2.065041 | 4.872213 | 0.003465 | 0.080324 | -1.44221 |
| lnc-AASS-1:1      | -1.40485 | 4.238351 | -4.87116 | 0.003469 | 0.080327 | -1.44327 |
| T055857           | 1.015312 | 9.310205 | 4.868148 | 0.003479 | 0.080431 | -1.4463  |
| lnc-MATN1-1:1     | 1.167531 | 4.329786 | 4.86767  | 0.00348  | 0.08044  | -1.44678 |
| NONHSAT215169.1   | -1.40144 | 2.854235 | -4.86755 | 0.003481 | 0.08044  | -1.4469  |
| lnc-GALC-15:1     | 1.299769 | 1.671753 | 4.866298 | 0.003485 | 0.080443 | -1.44816 |
| NONHSAT155835.1   | 1.828062 | 3.281298 | 4.86515  | 0.003489 | 0.08049  | -1.44932 |
| lnc-NFASC-1:1     | 1.009173 | 4.961307 | 4.864299 | 0.003491 | 0.080495 | -1.45017 |
| lnc-ESM1-4:1      | 1.766451 | 5.044724 | 4.864186 | 0.003492 | 0.080495 | -1.45029 |
| ENST00000642657.1 | -1.05836 | 2.442009 | -4.86302 | 0.003496 | 0.080541 | -1.45146 |
| NONHSAT218061.1   | 1.205884 | 1.749855 | 4.862192 | 0.003498 | 0.080541 | -1.45229 |
| MSTRG.14663.1     | 1.074911 | 4.839676 | 4.857911 | 0.003513 | 0.080626 | -1.4566  |
| MSTRG.54072.1     | 1.436878 | 2.062884 | 4.856784 | 0.003516 | 0.080675 | -1.45774 |
| MSTRG.54225.2     | 1.183857 | 3.634497 | 4.856143 | 0.003519 | 0.080675 | -1.45838 |
| lnc-GRXCR2-1:1    | -1.24952 | 4.218677 | -4.8558  | 0.00352  | 0.080675 | -1.45873 |
| lnc-PGPEP1-4:1    | 1.319703 | 4.579146 | 4.854888 | 0.003523 | 0.080675 | -1.45965 |
| NONHSAT161481.1   | 1.400153 | 5.31832  | 4.854404 | 0.003524 | 0.080681 | -1.46014 |
| ENST00000431019.1 | -1.18631 | 2.657061 | -4.85367 | 0.003527 | 0.080693 | -1.46087 |
| NONHSAT167937.1   | 1.242547 | 6.092191 | 4.853219 | 0.003528 | 0.080693 | -1.46133 |
| NONHSAT188334.1   | 1.108518 | 5.527583 | 4.851685 | 0.003534 | 0.08072  | -1.46288 |
| NONHSAT191845.1   | -1.2371  | 2.978588 | -4.85085 | 0.003536 | 0.080733 | -1.46372 |
| ENST00000564193.1 | 1.340131 | 3.223721 | 4.848624 | 0.003544 | 0.080835 | -1.46596 |
| NONHSAT210143.1   | 1.266327 | 3.526271 | 4.84845  | 0.003545 | 0.080835 | -1.46614 |
| lnc-PTPN2-10:1    | 2.176617 | 2.673204 | 4.846987 | 0.003549 | 0.080863 | -1.46762 |
| lnc-B4GALT7-1:2   | -1.30714 | 1.971248 | -4.84569 | 0.003554 | 0.080871 | -1.46892 |
| ENST00000663213.1 | 1.598052 | 1.878547 | 4.84527  | 0.003555 | 0.080885 | -1.46935 |
| NONHSAT201829.1   | 1.001848 | 4.99173  | 4.844858 | 0.003557 | 0.080899 | -1.46976 |
| NONHSAT157099.1   | -1.20112 | 4.937662 | -4.8441  | 0.003559 | 0.080917 | -1.47053 |
| MSTRG.43953.1     | 1.537672 | 5.23995  | 4.844014 | 0.00356  | 0.080917 | -1.47062 |
| NONHSAT151324.1   | 1.326136 | 1.719933 | 4.84252  | 0.003565 | 0.080982 | -1.47212 |
| ENST00000638312.1 | 1.502083 | 1.888606 | 4.842356 | 0.003565 | 0.080982 | -1.47229 |
| lnc-CAMK1G-6:1    | 1.532754 | 2.0777   | 4.841139 | 0.003569 | 0.080985 | -1.47352 |
| NONHSAT154770.1   | 1.145752 | 4.872865 | 4.840618 | 0.003571 | 0.080989 | -1.47404 |
| NONHSAT171137.1   | 1.682684 | 2.421457 | 4.837698 | 0.003581 | 0.081022 | -1.47699 |
| NONHSAT205483.1   | 1.10825  | 3.198137 | 4.836163 | 0.003586 | 0.081101 | -1.47855 |
| lnc-NDNF-1:1      | -1.00562 | 1.696698 | -4.83497 | 0.00359  | 0.081101 | -1.47976 |
| lnc-BRF1-70:1     | 1.178168 | 3.596022 | 4.833726 | 0.003595 | 0.081122 | -1.48101 |

|                   |          |          |          |          |          |          |
|-------------------|----------|----------|----------|----------|----------|----------|
| lnc-C10orf105-5:1 | 1.173276 | 4.063704 | 4.833069 | 0.003597 | 0.081155 | -1.48167 |
| NONHSAT164867.1   | -1.63613 | 2.365795 | -4.83241 | 0.003599 | 0.081169 | -1.48234 |
| T359296           | -1.58896 | 2.527018 | -4.8313  | 0.003603 | 0.08122  | -1.48347 |
| T363553           | 1.695142 | 3.285445 | 4.830072 | 0.003607 | 0.081276 | -1.4847  |
| NONHSAT215158.1   | 1.251167 | 1.907232 | 4.829143 | 0.00361  | 0.081314 | -1.48564 |
| ENST00000639687.1 | 1.31789  | 2.289178 | 4.828913 | 0.003611 | 0.081314 | -1.48588 |
| lnc-SHOX2-8:1     | -2.04291 | 3.80987  | -4.82632 | 0.00362  | 0.081404 | -1.4885  |
| NONHSAT179202.1   | 1.525869 | 4.424855 | 4.826128 | 0.003621 | 0.081404 | -1.48869 |
| NONHSAT173439.1   | 1.971993 | 2.217443 | 4.825034 | 0.003625 | 0.081434 | -1.4898  |
| lnc-ATP23-8:1     | 1.01173  | 1.701963 | 4.823414 | 0.00363  | 0.081439 | -1.49144 |
| MSTRG.17540.1     | 1.044864 | 4.60182  | 4.822028 | 0.003635 | 0.081451 | -1.49285 |
| NONHSAT199139.1   | 2.409061 | 3.028706 | 4.822006 | 0.003635 | 0.081451 | -1.49287 |
| NONHSAT223695.1   | 1.365329 | 1.70608  | 4.821336 | 0.003637 | 0.081451 | -1.49355 |
| ENST00000510176.1 | -1.79686 | 2.228841 | -4.82119 | 0.003638 | 0.081451 | -1.49369 |
| NONHSAT157921.1   | 1.079915 | 5.656155 | 4.819938 | 0.003642 | 0.081481 | -1.49496 |
| NONHSAT169420.1   | 1.650471 | 2.636897 | 4.819504 | 0.003644 | 0.081481 | -1.4954  |
| NONHSAT218745.1   | 1.229404 | 3.513406 | 4.819444 | 0.003644 | 0.081481 | -1.49546 |
| NONHSAT192820.1   | -1.43531 | 2.023566 | -4.81936 | 0.003644 | 0.081481 | -1.49555 |
| MSTRG.2492.1      | -1.52619 | 3.692284 | -4.81901 | 0.003646 | 0.081481 | -1.4959  |
| lnc-C12orf42-6:1  | 1.410062 | 2.296612 | 4.81662  | 0.003654 | 0.081542 | -1.49833 |
| LINC02397:28      | 1.591984 | 2.245352 | 4.816321 | 0.003655 | 0.081542 | -1.49863 |
| NONHSAT175341.1   | 1.072834 | 5.518038 | 4.815379 | 0.003658 | 0.081554 | -1.49958 |
| ENST00000442260.1 | 1.176306 | 8.503987 | 4.815058 | 0.003659 | 0.081561 | -1.49991 |
| NONHSAT181505.1   | 1.698687 | 5.02342  | 4.814197 | 0.003662 | 0.081575 | -1.50078 |
| NONHSAT162394.1   | 1.256675 | 6.539618 | 4.813531 | 0.003665 | 0.081575 | -1.50146 |
| NONHSAT214459.1   | -1.1575  | 2.561063 | -4.81351 | 0.003665 | 0.081575 | -1.50148 |
| MSTRG.13586.1     | -1.47975 | 1.877506 | -4.81212 | 0.00367  | 0.081601 | -1.50289 |
| NONHSAT218914.1   | -1.14533 | 1.910554 | -4.81202 | 0.00367  | 0.081601 | -1.50299 |
| lnc-ALDH9A1-3:2   | -1.07114 | 2.788991 | -4.81056 | 0.003675 | 0.08168  | -1.50448 |
| lnc-IGF1R-1:1     | 1.616907 | 2.392786 | 4.810281 | 0.003676 | 0.08168  | -1.50475 |
| lnc-TBCCD1-2:1    | 1.986354 | 2.538045 | 4.809671 | 0.003678 | 0.08168  | -1.50537 |
| NONHSAT161281.1   | 2.076024 | 2.144033 | 4.807234 | 0.003687 | 0.081764 | -1.50785 |
| NONHSAT214868.1   | 1.706326 | 3.939823 | 4.806624 | 0.003689 | 0.081764 | -1.50847 |
| ENST00000602529.2 | 1.025051 | 5.160483 | 4.805259 | 0.003694 | 0.08177  | -1.50985 |
| lnc-AGMAT-1:2     | 1.510987 | 4.698218 | 4.80501  | 0.003695 | 0.081772 | -1.5101  |
| NONHSAT154177.1   | 1.306538 | 4.704441 | 4.80414  | 0.003698 | 0.081822 | -1.51099 |
| NONHSAT223150.1   | -1.07613 | 3.531751 | -4.80216 | 0.003705 | 0.08183  | -1.513   |
| ENST00000617867.1 | -2.01183 | 3.260047 | -4.8017  | 0.003707 | 0.08183  | -1.51346 |
| NONHSAT196979.1   | 1.098832 | 1.893197 | 4.801283 | 0.003708 | 0.08183  | -1.51389 |
| ENST00000423873.5 | -1.06856 | 3.688141 | -4.80109 | 0.003709 | 0.08183  | -1.51409 |
| MSTRG.1837.5      | -1.48891 | 4.810335 | -4.79952 | 0.003714 | 0.081845 | -1.51568 |
| NONHSAT156407.1   | 1.104771 | 2.900059 | 4.799412 | 0.003715 | 0.081845 | -1.51579 |
| ENST00000667077.1 | 1.578512 | 4.232556 | 4.799169 | 0.003716 | 0.081845 | -1.51604 |
| ENST00000526041.1 | 1.921446 | 3.775134 | 4.798022 | 0.00372  | 0.081845 | -1.5172  |
| lnc-ASAP3-1:1     | 1.121089 | 5.378674 | 4.79641  | 0.003725 | 0.081869 | -1.51884 |
| lnc-MCTP2-13:1    | 1.880411 | 4.366185 | 4.796021 | 0.003727 | 0.081869 | -1.51924 |
| lnc-MAFB-1:1      | -1.72932 | 4.05863  | -4.79547 | 0.003729 | 0.081895 | -1.5198  |
| NONHSAT180848.1   | 1.881042 | 2.790776 | 4.794889 | 0.003731 | 0.081903 | -1.52039 |

|                        |          |          |          |          |          |          |
|------------------------|----------|----------|----------|----------|----------|----------|
| NONHSAT190313.1        | -1.11157 | 2.623855 | -4.79475 | 0.003731 | 0.081903 | -1.52053 |
| NONHSAT205692.1        | 1.527013 | 3.257508 | 4.788722 | 0.003753 | 0.082258 | -1.52666 |
| NONHSAT152099.1        | 1.307233 | 2.360526 | 4.788372 | 0.003754 | 0.082258 | -1.52702 |
| lnc-HIST2H3PS2-8:1     | 1.103121 | 5.210053 | 4.78698  | 0.003759 | 0.082314 | -1.52844 |
| NR_002971              | -1.34761 | 5.968783 | -4.78586 | 0.003763 | 0.082364 | -1.52957 |
| NR_110093              | 1.24097  | 1.991962 | 4.785816 | 0.003764 | 0.082364 | -1.52962 |
| lnc-PRKN-9:4           | 1.165176 | 3.644553 | 4.785671 | 0.003764 | 0.082364 | -1.52977 |
| NONHSAT215675.1        | 1.156505 | 1.937283 | 4.784471 | 0.003768 | 0.082402 | -1.53099 |
| NONHSAT174859.1        | 1.284094 | 2.964624 | 4.782218 | 0.003777 | 0.082488 | -1.53329 |
| ENST00000599484.1      | -1.02386 | 3.237005 | -4.78206 | 0.003777 | 0.082488 | -1.53344 |
| lnc-TBX19-1:1          | 1.41902  | 7.016142 | 4.781711 | 0.003778 | 0.082488 | -1.53381 |
| NR_110764              | 1.588905 | 2.449631 | 4.781175 | 0.00378  | 0.082488 | -1.53435 |
| T275252                | -1.02017 | 5.04813  | -4.77911 | 0.003788 | 0.082566 | -1.53646 |
| lnc-FAM133B-3:1        | -1.22223 | 3.786508 | -4.77908 | 0.003788 | 0.082566 | -1.53649 |
| lnc-BAAT-3:3           | 1.202291 | 2.380249 | 4.777988 | 0.003792 | 0.082605 | -1.5376  |
| lnc-USP35-18:2         | 1.02432  | 2.842469 | 4.777378 | 0.003794 | 0.082605 | -1.53822 |
| NONHSAT177259.1        | 1.012325 | 1.545521 | 4.777148 | 0.003795 | 0.082605 | -1.53846 |
| ENST00000439186.1      | -1.74468 | 2.591552 | -4.7767  | 0.003797 | 0.082605 | -1.53891 |
| NONHSAT152985.1        | 1.184304 | 4.910446 | 4.775864 | 0.0038   | 0.082605 | -1.53977 |
| MSTRG.38782.1          | 1.048161 | 5.062638 | 4.774998 | 0.003803 | 0.082605 | -1.54065 |
| lnc-CCDC167-2:2        | 2.43381  | 4.864143 | 4.774781 | 0.003804 | 0.082605 | -1.54087 |
| MSTRG.51389.1          | -1.25035 | 4.475566 | -4.77471 | 0.003804 | 0.082605 | -1.54094 |
| NONHSAT208139.1        | 2.015451 | 2.707589 | 4.774551 | 0.003805 | 0.082605 | -1.54111 |
| ENST00000667988.1      | 1.011102 | 3.205617 | 4.774003 | 0.003807 | 0.082614 | -1.54166 |
| NONHSAT167914.1        | 2.268099 | 2.325946 | 4.771613 | 0.003815 | 0.082696 | -1.5441  |
| NONHSAT224354.1        | 1.720195 | 2.063596 | 4.771085 | 0.003817 | 0.082696 | -1.54464 |
| ENST00000595644.1      | 1.118849 | 4.188477 | 4.770971 | 0.003818 | 0.082696 | -1.54476 |
| NR_126010              | 1.83442  | 2.524755 | 4.768863 | 0.003825 | 0.082827 | -1.54691 |
| lnc-BTBD3-1:1          | 1.091437 | 2.707791 | 4.768252 | 0.003828 | 0.082832 | -1.54753 |
| NONHSAT222995.1        | 1.049698 | 6.540285 | 4.768136 | 0.003828 | 0.082832 | -1.54765 |
| lnc-SPANXN5-2:2        | 1.073514 | 4.399551 | 4.767768 | 0.00383  | 0.082832 | -1.54803 |
| NONHSAT155210.1        | -1.07361 | 1.918746 | -4.76769 | 0.00383  | 0.082832 | -1.54811 |
| NONHSAT153443.1        | 1.296385 | 7.103749 | 4.765815 | 0.003837 | 0.082858 | -1.55002 |
| lnc-JMJD7-PLA2G4B-2:24 | -1.31682 | 4.794208 | -4.76489 | 0.00384  | 0.082858 | -1.55097 |
| NONHSAT161973.1        | 1.113521 | 4.812605 | 4.764828 | 0.00384  | 0.082858 | -1.55103 |
| NONHSAT210886.1        | 1.009962 | 2.864212 | 4.763431 | 0.003846 | 0.082858 | -1.55246 |
| NONHSAT217840.1        | 1.984235 | 3.083406 | 4.76268  | 0.003848 | 0.082858 | -1.55323 |
| NONHSAT187627.1        | 1.323946 | 4.273571 | 4.762236 | 0.00385  | 0.082858 | -1.55368 |
| NONHSAT150595.1        | 1.229384 | 5.294524 | 4.760572 | 0.003856 | 0.082858 | -1.55538 |
| lnc-HAAO-7:2           | 1.794256 | 2.333077 | 4.760498 | 0.003856 | 0.082858 | -1.55546 |
| MSTRG.63786.1          | -1.10738 | 3.225874 | -4.76047 | 0.003857 | 0.082858 | -1.55549 |
| lnc-SPRR2D-2:1         | 1.2245   | 6.548972 | 4.759825 | 0.003859 | 0.082858 | -1.55615 |
| NONHSAT153462.1        | -1.28267 | 2.885683 | -4.75875 | 0.003863 | 0.082858 | -1.55724 |
| lnc-STBD1-5:2          | -1.16573 | 8.190079 | -4.7587  | 0.003863 | 0.082858 | -1.5573  |
| NONHSAT203765.1        | 1.380537 | 5.551612 | 4.75838  | 0.003864 | 0.082858 | -1.55762 |
| NONHSAT208330.1        | 1.286637 | 4.092295 | 4.758058 | 0.003866 | 0.082858 | -1.55795 |
| lnc-SLC25A46-2:1       | 1.262761 | 2.030189 | 4.755066 | 0.003877 | 0.083034 | -1.56101 |

|                   |          |          |          |          |          |          |
|-------------------|----------|----------|----------|----------|----------|----------|
| NONHSAT197277.1   | -1.12568 | 2.288834 | -4.75476 | 0.003878 | 0.083034 | -1.56132 |
| lnc-RGMB-4:1      | -1.87525 | 2.6859   | -4.75248 | 0.003886 | 0.083163 | -1.56366 |
| T354765           | 1.196474 | 3.134772 | 4.752397 | 0.003887 | 0.083163 | -1.56374 |
| NONHSAT203293.1   | 1.055109 | 5.612728 | 4.751104 | 0.003892 | 0.083187 | -1.56507 |
| lnc-KDM4A-1:1     | -1.47033 | 3.819218 | -4.74772 | 0.003904 | 0.083299 | -1.56853 |
| NONHSAT173969.1   | 1.739781 | 3.732127 | 4.747514 | 0.003905 | 0.083299 | -1.56874 |
| ENST00000554759.1 | 1.353179 | 4.746225 | 4.745771 | 0.003912 | 0.083387 | -1.57053 |
| MSTRG.49316.1     | -1.10179 | 2.633784 | -4.74427 | 0.003917 | 0.083448 | -1.57206 |
| MSTRG.45920.1     | -1.52083 | 3.370924 | -4.74423 | 0.003918 | 0.083448 | -1.57211 |
| NONHSAT179060.1   | -1.50821 | 1.866808 | -4.74247 | 0.003924 | 0.08353  | -1.57392 |
| NONHSAT205596.1   | 1.021379 | 1.890261 | 4.741489 | 0.003928 | 0.083579 | -1.57492 |
| NONHSAT161144.1   | 2.593148 | 3.078142 | 4.740719 | 0.003931 | 0.083579 | -1.57571 |
| NONHSAT196277.1   | 1.830128 | 4.002322 | 4.739468 | 0.003936 | 0.083623 | -1.57699 |
| lnc-CDH12-7:1     | 1.14711  | 1.900485 | 4.73935  | 0.003936 | 0.083623 | -1.57711 |
| NONHSAT205421.1   | 1.509373 | 2.191594 | 4.736361 | 0.003947 | 0.083701 | -1.58018 |
| lnc-DLX5-4:1      | -1.23288 | 6.076387 | -4.73628 | 0.003948 | 0.083701 | -1.58026 |
| lnc-CRIM1-3:1     | -1.53853 | 4.322789 | -4.73617 | 0.003948 | 0.083701 | -1.58037 |
| lnc-SNAI1-5:2     | 1.451606 | 6.970732 | 4.736024 | 0.003949 | 0.083701 | -1.58052 |
| lnc-KIAA1257-3:1  | 1.767744 | 4.743496 | 4.732751 | 0.003961 | 0.083874 | -1.58388 |
| ENST00000571113.1 | -1.57569 | 3.505321 | -4.73003 | 0.003972 | 0.08394  | -1.58668 |
| NONHSAT149360.1   | -1.20025 | 3.650301 | -4.72809 | 0.003979 | 0.084025 | -1.58867 |
| ENST00000433876.2 | -1.77991 | 3.267965 | -4.7279  | 0.00398  | 0.084025 | -1.58887 |
| MSTRG.7933.1      | -1.4113  | 3.789448 | -4.72647 | 0.003985 | 0.084099 | -1.59033 |
| NONHSAT221687.1   | -1.4038  | 3.783316 | -4.72582 | 0.003988 | 0.084106 | -1.591   |
| lnc-CHSY1-1:1     | -1.1268  | 5.074297 | -4.72552 | 0.003989 | 0.084113 | -1.59131 |
| lnc-KDM4B-3:1     | 2.068681 | 3.068343 | 4.724992 | 0.003991 | 0.084136 | -1.59186 |
| lnc-SNX30-2:1     | -1.45699 | 3.913891 | -4.72431 | 0.003994 | 0.084143 | -1.59255 |
| MSTRG.6138.1      | -1.44822 | 2.486072 | -4.7234  | 0.003997 | 0.084181 | -1.5935  |
| NONHSAT154603.1   | -1.19747 | 2.815223 | -4.72166 | 0.004004 | 0.084192 | -1.59528 |
| T262081           | 2.381022 | 3.344403 | 4.721232 | 0.004006 | 0.084192 | -1.59572 |
| NONHSAT215859.1   | 1.154256 | 4.42381  | 4.721038 | 0.004007 | 0.084192 | -1.59592 |
| MSTRG.51601.1     | 1.084705 | 4.582788 | 4.720299 | 0.004009 | 0.084192 | -1.59668 |
| ENST00000548359.1 | 2.049237 | 3.096645 | 4.720148 | 0.00401  | 0.084192 | -1.59684 |
| lnc-BRF1-37:1     | 1.610983 | 4.110723 | 4.719772 | 0.004011 | 0.084192 | -1.59722 |
| MSTRG.61914.1     | -1.11572 | 5.013826 | -4.71804 | 0.004018 | 0.084223 | -1.59901 |
| lnc-STK32C-6:1    | 1.091909 | 4.992366 | 4.717776 | 0.004019 | 0.084223 | -1.59928 |
| MSTRG.52951.1     | 1.260765 | 1.932513 | 4.715644 | 0.004028 | 0.084271 | -1.60147 |
| lnc-PLA2G4C-1:1   | 1.057872 | 3.452957 | 4.714586 | 0.004032 | 0.084288 | -1.60256 |
| lnc-HAND1-5:1     | 1.066428 | 6.20422  | 4.713281 | 0.004037 | 0.084328 | -1.6039  |
| T057556           | 2.038474 | 3.04417  | 4.712596 | 0.004039 | 0.084337 | -1.60461 |
| NONHSAT186078.1   | 1.656871 | 2.327063 | 4.711513 | 0.004044 | 0.084362 | -1.60572 |
| NONHSAT167831.1   | 1.971881 | 2.103055 | 4.711334 | 0.004044 | 0.084362 | -1.60591 |
| lnc-CCNA2-1:1     | -2.05355 | 2.489019 | -4.71094 | 0.004046 | 0.084377 | -1.60632 |
| NONHSAT196897.1   | 1.099724 | 3.818143 | 4.7106   | 0.004047 | 0.084387 | -1.60667 |
| NONHSAT196937.1   | -1.23616 | 3.51286  | -4.71015 | 0.004049 | 0.084391 | -1.60713 |
| lnc-AMFR-5:1      | -1.49978 | 2.689447 | -4.70954 | 0.004051 | 0.084422 | -1.60775 |
| ENST00000501178.2 | 1.493486 | 3.811414 | 4.709175 | 0.004053 | 0.08443  | -1.60813 |
| NONHSAT188024.1   | 1.215604 | 1.680936 | 4.708855 | 0.004054 | 0.08443  | -1.60846 |

|                   |          |          |          |          |          |          |
|-------------------|----------|----------|----------|----------|----------|----------|
| lnc-ABCB11-1:1    | -1.45252 | 5.371286 | -4.70825 | 0.004057 | 0.08443  | -1.60908 |
| lnc-RNF6-5:1      | -1.18485 | 6.186779 | -4.70758 | 0.004059 | 0.08446  | -1.60977 |
| ENST00000649670.1 | -1.47616 | 3.644059 | -4.70691 | 0.004062 | 0.084461 | -1.61047 |
| lnc-SYNDIG1-3:3   | 1.440474 | 5.612263 | 4.705844 | 0.004066 | 0.084513 | -1.61157 |
| MSTRG.45338.1     | 1.800327 | 3.201095 | 4.705665 | 0.004067 | 0.084513 | -1.61175 |
| NONHSAT206283.1   | -1.39036 | 2.044726 | -4.70413 | 0.004073 | 0.084538 | -1.61334 |
| MSTRG.20108.1     | 1.281436 | 1.772364 | 4.700398 | 0.004088 | 0.084716 | -1.61718 |
| lnc-ANKRD36-13:1  | 1.216415 | 5.001798 | 4.700234 | 0.004088 | 0.084716 | -1.61735 |
| NONHSAT151360.1   | 1.438985 | 5.202096 | 4.699433 | 0.004092 | 0.084716 | -1.61818 |
| NONHSAT218900.1   | -1.2752  | 3.404272 | -4.6994  | 0.004092 | 0.084716 | -1.61821 |
| lnc-WDR60-9:1     | -1.10541 | 2.494733 | -4.69561 | 0.004107 | 0.084855 | -1.62213 |
| lnc-TSG101-2:1    | -1.04994 | 4.143787 | -4.69513 | 0.004109 | 0.084855 | -1.62262 |
| ENST00000508823.1 | 1.08743  | 2.889024 | 4.694779 | 0.00411  | 0.084855 | -1.62298 |
| NONHSAT156576.1   | 1.09127  | 1.605159 | 4.693903 | 0.004114 | 0.084855 | -1.62389 |
| NONHSAT188158.1   | 1.118609 | 3.469952 | 4.6936   | 0.004115 | 0.084855 | -1.6242  |
| lnc-TPT1-2:1      | -1.51485 | 2.628921 | -4.6933  | 0.004116 | 0.084855 | -1.62451 |
| MSTRG.57993.1     | 1.393195 | 1.749552 | 4.693174 | 0.004117 | 0.084855 | -1.62464 |
| NONHSAT158551.1   | 1.016837 | 5.118524 | 4.686931 | 0.004142 | 0.08508  | -1.63109 |
| lnc-IMP4-11:1     | -1.89914 | 2.868413 | -4.68681 | 0.004142 | 0.08508  | -1.63122 |
| lnc-BMP15-1:5     | 1.257489 | 4.564103 | 4.686469 | 0.004144 | 0.085091 | -1.63157 |
| MSTRG.48177.1     | -1.88446 | 3.115527 | -4.68501 | 0.004149 | 0.08516  | -1.63308 |
| lnc-ARHGAP20-11:2 | 1.817857 | 1.920923 | 4.680536 | 0.004168 | 0.085342 | -1.63771 |
| MSTRG.54591.1     | -1.77714 | 3.288593 | -4.68032 | 0.004168 | 0.085342 | -1.63793 |
| T226026           | 1.958442 | 2.471617 | 4.679437 | 0.004172 | 0.085381 | -1.63884 |
| ENST00000429151.2 | -1.4299  | 2.303964 | -4.67831 | 0.004177 | 0.08544  | -1.64001 |
| lnc-GLP1R-4:1     | -1.24071 | 4.968261 | -4.67737 | 0.00418  | 0.085447 | -1.64098 |
| ENST00000644669.1 | -1.62187 | 2.522696 | -4.67618 | 0.004185 | 0.085508 | -1.64221 |
| T268978           | 1.377435 | 1.733901 | 4.674635 | 0.004192 | 0.085525 | -1.64382 |
| MSTRG.54666.1     | 1.07294  | 1.897026 | 4.674392 | 0.004193 | 0.085525 | -1.64407 |
| NONHSAT167801.1   | 1.062538 | 4.500046 | 4.674176 | 0.004194 | 0.085525 | -1.64429 |
| lnc-C8orf76-2:1   | -1.57779 | 2.226078 | -4.6734  | 0.004197 | 0.08554  | -1.6451  |
| lnc-TTC25-4:1     | -1.48317 | 4.165453 | -4.67147 | 0.004205 | 0.085592 | -1.6471  |
| NONHSAT212095.1   | 2.333899 | 2.413879 | 4.671357 | 0.004205 | 0.085592 | -1.64721 |
| ENST00000501708.1 | -1.59518 | 2.978992 | -4.67126 | 0.004205 | 0.085592 | -1.64731 |
| lnc-DDX18-6:1     | 1.337787 | 1.768223 | 4.669375 | 0.004213 | 0.085676 | -1.64927 |
| ENST00000550177.2 | 1.086649 | 3.721741 | 4.66906  | 0.004215 | 0.085676 | -1.64959 |
| ENST00000427387.1 | 1.026659 | 4.580442 | 4.666715 | 0.004224 | 0.08572  | -1.65203 |
| NONHSAT208894.1   | 1.623779 | 7.638886 | 4.666478 | 0.004225 | 0.08572  | -1.65227 |
| ENST00000576808.1 | 1.646889 | 5.358873 | 4.665024 | 0.004231 | 0.08579  | -1.65378 |
| lnc-SNX19-4:1     | 1.102991 | 7.602929 | 4.664189 | 0.004235 | 0.085843 | -1.65465 |
| NONHSAT187568.1   | -1.61655 | 2.40673  | -4.66298 | 0.00424  | 0.085893 | -1.6559  |
| ENST00000624879.1 | -1.08341 | 4.774768 | -4.66229 | 0.004243 | 0.085917 | -1.65662 |
| NR_110201         | 2.287798 | 3.383323 | 4.661028 | 0.004248 | 0.085953 | -1.65793 |
| ENST00000534505.1 | 1.359655 | 3.684978 | 4.660439 | 0.00425  | 0.085982 | -1.65854 |
| MSTRG.72588.1     | -1.04597 | 3.641335 | -4.6574  | 0.004263 | 0.086121 | -1.66169 |
| NONHSAT220915.1   | 1.170109 | 1.940319 | 4.654954 | 0.004273 | 0.086258 | -1.66423 |
| ENST00000525548.1 | -1.23767 | 3.575054 | -4.65454 | 0.004275 | 0.086259 | -1.66467 |
| NONHSAT158550.1   | 1.024304 | 4.746795 | 4.653778 | 0.004278 | 0.086261 | -1.66546 |

|                   |          |          |          |          |          |          |
|-------------------|----------|----------|----------|----------|----------|----------|
| lnc-SPC24-1:1     | -1.23626 | 3.838923 | -4.65313 | 0.004281 | 0.086274 | -1.66612 |
| NONHSAT160149.1   | 1.360574 | 5.970747 | 4.651365 | 0.004288 | 0.086312 | -1.66796 |
| ENST00000531609.1 | -1.84035 | 2.376369 | -4.65128 | 0.004289 | 0.086312 | -1.66806 |
| lnc-NR5A2-6:1     | -1.09878 | 3.051852 | -4.65062 | 0.004291 | 0.086312 | -1.66874 |
| NONHSAT176820.1   | 1.877204 | 2.47968  | 4.649903 | 0.004294 | 0.086312 | -1.66948 |
| lnc-GNAQ-11:1     | -1.56141 | 2.26161  | -4.64922 | 0.004297 | 0.086312 | -1.67019 |
| NONHSAT161066.1   | -1.13492 | 2.374251 | -4.64869 | 0.004299 | 0.086323 | -1.67075 |
| MSTRG.62465.1     | -1.26589 | 1.674798 | -4.64694 | 0.004307 | 0.086399 | -1.67256 |
| NONHSAT155026.1   | 1.638217 | 6.634304 | 4.645947 | 0.004311 | 0.0864   | -1.6736  |
| NONHSAT222549.1   | 1.358868 | 4.502011 | 4.645617 | 0.004312 | 0.086411 | -1.67394 |
| lnc-NUDT4-2:1     | -1.07229 | 2.460502 | -4.64298 | 0.004324 | 0.086515 | -1.67668 |
| T297794           | -1.54127 | 2.716031 | -4.64167 | 0.004329 | 0.086515 | -1.67805 |
| NONHSAT223098.1   | 1.405418 | 3.732884 | 4.641626 | 0.004329 | 0.086515 | -1.67809 |
| ENST00000522189.1 | 1.183747 | 4.053474 | 4.641411 | 0.00433  | 0.086515 | -1.67832 |
| NONHSAT221953.1   | 1.09112  | 4.775408 | 4.641021 | 0.004332 | 0.086515 | -1.67872 |
| ENST00000445589.1 | 2.350136 | 5.418035 | 4.638857 | 0.004341 | 0.086573 | -1.68098 |
| MSTRG.41122.1     | 2.39603  | 3.57042  | 4.63864  | 0.004342 | 0.086574 | -1.6812  |
| lnc-MAP3K9-12:1   | -1.34169 | 3.540396 | -4.6371  | 0.004349 | 0.086671 | -1.68281 |
| NONHSAT162129.1   | 1.425617 | 2.764188 | 4.636843 | 0.00435  | 0.086674 | -1.68308 |
| lnc-PARP8-6:1     | -1.05183 | 2.85905  | -4.63502 | 0.004357 | 0.08668  | -1.68497 |
| MSTRG.13771.4     | 1.645959 | 1.909739 | 4.634956 | 0.004358 | 0.08668  | -1.68504 |
| lnc-ZNF486-3:1    | -1.27233 | 3.351297 | -4.63465 | 0.004359 | 0.08668  | -1.68536 |
| lnc-LGALS16-1:1   | -1.41116 | 2.439497 | -4.63424 | 0.004361 | 0.08668  | -1.68579 |
| NONHSAT193880.1   | 1.619716 | 3.48381  | 4.634036 | 0.004362 | 0.08668  | -1.686   |
| MSTRG.63485.1     | -1.30281 | 2.612499 | -4.63403 | 0.004362 | 0.08668  | -1.68601 |
| ENST00000569618.1 | -2.01998 | 2.595637 | -4.63398 | 0.004362 | 0.08668  | -1.68606 |
| lnc-BCL10-1:1     | -1.08654 | 5.326873 | -4.63355 | 0.004364 | 0.08668  | -1.68651 |
| ENST00000651527.1 | 1.499327 | 2.233208 | 4.633486 | 0.004364 | 0.08668  | -1.68657 |
| ENST00000658344.1 | 1.236117 | 2.1213   | 4.633349 | 0.004365 | 0.08668  | -1.68672 |
| lnc-GAA-2:1       | -1.17573 | 4.917373 | -4.63263 | 0.004368 | 0.08671  | -1.68747 |
| T189064           | -1.17413 | 1.875672 | -4.63217 | 0.00437  | 0.086732 | -1.68795 |
| lnc-SMPDL3A-2:1   | 1.797634 | 2.412248 | 4.630454 | 0.004377 | 0.086827 | -1.68973 |
| NONHSAT203517.1   | -1.16572 | 4.277957 | -4.62877 | 0.004384 | 0.08684  | -1.69149 |
| lnc-LEKR1-1:9     | -1.29665 | 2.474816 | -4.62875 | 0.004384 | 0.08684  | -1.69151 |
| ENST00000657726.1 | -1.11679 | 1.647191 | -4.62786 | 0.004388 | 0.08684  | -1.69244 |
| ENST00000531549.1 | -1.06943 | 4.18107  | -4.62756 | 0.004389 | 0.08684  | -1.69275 |
| NONHSAT209573.1   | 1.17297  | 1.900358 | 4.627537 | 0.00439  | 0.08684  | -1.69278 |
| lnc-SLC6A14-1:1   | 1.535249 | 3.107844 | 4.627534 | 0.00439  | 0.08684  | -1.69278 |
| T275025           | -1.02562 | 2.707722 | -4.62744 | 0.00439  | 0.08684  | -1.69288 |
| NONHSAT157929.1   | 2.119658 | 3.357681 | 4.625463 | 0.004399 | 0.086894 | -1.69494 |
| lnc-OR51B4-3:1    | -2.34041 | 5.920381 | -4.62388 | 0.004405 | 0.086966 | -1.6966  |
| NONHSAT187455.1   | 1.26187  | 3.752053 | 4.623834 | 0.004406 | 0.086966 | -1.69664 |
| LINC00052:6       | 1.021997 | 3.686147 | 4.622357 | 0.004412 | 0.087058 | -1.69818 |
| T172028           | -1.05621 | 3.833792 | -4.62105 | 0.004418 | 0.087084 | -1.69954 |
| NONHSAT219152.1   | 1.410606 | 3.551339 | 4.618177 | 0.00443  | 0.087246 | -1.70255 |
| MSTRG.62257.1     | 1.449139 | 1.780833 | 4.616583 | 0.004437 | 0.087315 | -1.70421 |
| lnc-C16orf95-2:20 | -1.09096 | 3.736407 | -4.61555 | 0.004442 | 0.087324 | -1.70529 |
| NONHSAT165148.1   | 1.4394   | 3.926639 | 4.615486 | 0.004442 | 0.087324 | -1.70536 |

|                   |          |          |          |          |          |          |
|-------------------|----------|----------|----------|----------|----------|----------|
| NONHSAT170031.1   | 1.873831 | 2.754966 | 4.614154 | 0.004448 | 0.087405 | -1.70675 |
| MSTRG.32971.1     | -1.31691 | 2.921839 | -4.61323 | 0.004452 | 0.087446 | -1.70772 |
| NONHSAT223760.1   | -1.80744 | 2.716022 | -4.61308 | 0.004452 | 0.087446 | -1.70788 |
| NONHSAT217052.1   | -1.25858 | 1.724297 | -4.6126  | 0.004455 | 0.087465 | -1.70837 |
| MSTRG.43853.1     | 1.397753 | 4.207835 | 4.612237 | 0.004456 | 0.087465 | -1.70876 |
| ENST00000470739.1 | 1.410074 | 2.052502 | 4.61218  | 0.004456 | 0.087465 | -1.70882 |
| NONHSAT153104.1   | 2.300845 | 2.696999 | 4.611435 | 0.00446  | 0.087465 | -1.7096  |
| NONHSAT153524.1   | -1.05505 | 5.788072 | -4.61131 | 0.00446  | 0.087465 | -1.70973 |
| lnc-PPP2R2A-5:1   | 1.397839 | 1.722258 | 4.609401 | 0.004469 | 0.087465 | -1.71172 |
| lnc-KMT2E-1:9     | -2.04621 | 2.932617 | -4.60929 | 0.004469 | 0.087465 | -1.71184 |
| lnc-TRAPPC12-6:1  | 1.711798 | 2.571048 | 4.608524 | 0.004473 | 0.087465 | -1.71264 |
| NONHSAT214398.1   | -1.17471 | 3.903101 | -4.60758 | 0.004477 | 0.087523 | -1.71363 |
| NONHSAT185531.1   | 1.191138 | 2.693826 | 4.606237 | 0.004483 | 0.087594 | -1.71503 |
| NONHSAT210389.1   | 1.108243 | 5.977421 | 4.603917 | 0.004493 | 0.087744 | -1.71746 |
| lnc-SPAG16-7:5    | -1.12663 | 3.463571 | -4.60139 | 0.004504 | 0.087898 | -1.72011 |
| NONHSAT187525.1   | -1.06559 | 1.629757 | -4.59938 | 0.004513 | 0.087975 | -1.72222 |
| ENST00000663787.1 | -1.73294 | 2.658863 | -4.5987  | 0.004516 | 0.087975 | -1.72292 |
| lnc-REL-6:3       | -1.19943 | 3.198864 | -4.59836 | 0.004518 | 0.087988 | -1.72329 |
| MSTRG.41590.10    | 1.196889 | 4.340442 | 4.596368 | 0.004526 | 0.088037 | -1.72537 |
| NONHSAT154279.1   | 1.059693 | 6.658138 | 4.594841 | 0.004533 | 0.088101 | -1.72697 |
| lnc-NGRN-1:1      | 1.542904 | 2.443873 | 4.594594 | 0.004534 | 0.088101 | -1.72723 |
| T049236           | 1.555748 | 2.373197 | 4.593272 | 0.00454  | 0.088141 | -1.72862 |
| lnc-RBM15-1:1     | 1.413717 | 3.482586 | 4.591551 | 0.004548 | 0.088224 | -1.73042 |
| NONHSAT185648.1   | -1.05796 | 4.408109 | -4.59134 | 0.004549 | 0.088224 | -1.73064 |
| NONHSAT200333.1   | 1.264149 | 6.856943 | 4.590763 | 0.004552 | 0.088231 | -1.73125 |
| lnc-TMEM242-6:1   | -1.9649  | 3.834668 | -4.59068 | 0.004552 | 0.088231 | -1.73134 |
| MSTRG.72460.2     | -1.25915 | 3.285955 | -4.58984 | 0.004556 | 0.088254 | -1.73222 |
| ENST00000448887.1 | 1.388683 | 2.099558 | 4.587604 | 0.004566 | 0.088345 | -1.73456 |
| lnc-PLGRKT-4:1    | 1.123288 | 2.989857 | 4.587054 | 0.004568 | 0.088345 | -1.73514 |
| MSTRG.46671.1     | 1.093205 | 1.945936 | 4.586949 | 0.004569 | 0.088345 | -1.73525 |
| NONHSAT223743.1   | 1.129732 | 4.545583 | 4.586141 | 0.004572 | 0.088345 | -1.7361  |
| NONHSAT187988.1   | -1.52745 | 2.33051  | -4.58569 | 0.004574 | 0.088345 | -1.73658 |
| NONHSAT200395.1   | 1.212087 | 3.094674 | 4.585426 | 0.004576 | 0.088345 | -1.73685 |
| lnc-PPP1R3B-7:1   | -1.24385 | 1.817977 | -4.58459 | 0.004579 | 0.08837  | -1.73773 |
| lnc-CDH6-4:1      | 1.288564 | 1.692362 | 4.58438  | 0.00458  | 0.08837  | -1.73795 |
| NONHSAT183785.1   | 2.01717  | 4.399517 | 4.583438 | 0.004585 | 0.088393 | -1.73894 |
| lnc-AAGAB-3:4     | -1.79515 | 2.394026 | -4.58302 | 0.004587 | 0.088393 | -1.73938 |
| lnc-SEC61G-9:1    | 1.260012 | 1.689127 | 4.582764 | 0.004588 | 0.088393 | -1.73965 |
| lnc-TP53TG3-9:2   | -1.07161 | 5.378851 | -4.58272 | 0.004588 | 0.088393 | -1.73969 |
| NONHSAT169877.1   | 1.078629 | 4.929836 | 4.581587 | 0.004593 | 0.088393 | -1.74088 |
| NONHSAT205713.1   | 2.761208 | 3.621397 | 4.580645 | 0.004597 | 0.088414 | -1.74187 |
| T271565           | -2.29226 | 2.794415 | -4.58042 | 0.004598 | 0.088417 | -1.74211 |
| NONHSAT162508.1   | 1.333412 | 5.06687  | 4.579523 | 0.004602 | 0.088479 | -1.74305 |
| ENST00000508038.1 | 1.470696 | 2.068432 | 4.578192 | 0.004609 | 0.0885   | -1.74445 |
| MSTRG.24013.1     | -1.3681  | 1.855671 | -4.57778 | 0.00461  | 0.0885   | -1.74488 |
| NONHSAT219556.1   | -1.09596 | 3.978683 | -4.57755 | 0.004611 | 0.0885   | -1.74513 |
| lnc-TNKS-2:1      | 1.924571 | 2.42472  | 4.576427 | 0.004617 | 0.088562 | -1.7463  |
| lnc-KLF4-12:1     | -1.03552 | 2.529343 | -4.57316 | 0.004632 | 0.088627 | -1.74974 |



|                   |          |          |          |          |          |          |
|-------------------|----------|----------|----------|----------|----------|----------|
| lnc-IDH3B-1:2     | 1.376199 | 4.148582 | 4.572974 | 0.004632 | 0.088627 | -1.74994 |
| NONHSAT185628.1   | 1.471248 | 2.098963 | 4.572742 | 0.004633 | 0.088627 | -1.75018 |
| lnc-DDX1-8:1      | -1.11091 | 3.059871 | -4.57165 | 0.004638 | 0.088696 | -1.75132 |
| MSTRG.30165.1     | 1.222723 | 1.720917 | 4.57148  | 0.004639 | 0.088696 | -1.75151 |
| NONHSAT188084.1   | -1.00647 | 4.952533 | -4.57043 | 0.004644 | 0.088708 | -1.75262 |
| NONHSAT196742.1   | 1.442239 | 2.019945 | 4.570269 | 0.004645 | 0.088708 | -1.75278 |
| ENST00000657275.1 | -1.16506 | 1.772231 | -4.57024 | 0.004645 | 0.088708 | -1.75281 |
| NONHSAT217880.1   | 1.257555 | 1.731246 | 4.570077 | 0.004646 | 0.088708 | -1.75298 |
| ENST00000668852.1 | -1.91764 | 2.457615 | -4.56911 | 0.00465  | 0.088753 | -1.754   |
| lnc-UBE2L5-5:1    | 1.25797  | 4.039001 | 4.568869 | 0.004651 | 0.088753 | -1.75426 |
| NONHSAT190035.1   | 1.116628 | 3.854715 | 4.568462 | 0.004653 | 0.088753 | -1.75468 |
| ENST00000669800.1 | 1.019907 | 4.378646 | 4.567748 | 0.004656 | 0.088754 | -1.75544 |
| NONHSAT191612.1   | -1.54681 | 3.192262 | -4.56757 | 0.004657 | 0.088754 | -1.75563 |
| NONHSAT211031.1   | -1.1121  | 4.319548 | -4.56694 | 0.00466  | 0.088762 | -1.75629 |
| NONHSAT171233.1   | 1.687449 | 2.534986 | 4.566332 | 0.004663 | 0.088762 | -1.75693 |
| ENST00000649987.1 | -1.89678 | 3.309726 | -4.56519 | 0.004668 | 0.088813 | -1.75813 |
| lnc-BCOR-12:2     | -1.06695 | 2.081407 | -4.56326 | 0.004677 | 0.088889 | -1.76016 |
| lnc-MSMO1-1:1     | -1.32195 | 3.730716 | -4.5616  | 0.004685 | 0.088932 | -1.76191 |
| lnc-HES1-9:1      | 1.109271 | 1.79951  | 4.55868  | 0.004699 | 0.089052 | -1.76499 |
| lnc-SHISA6-2:1    | -1.18825 | 3.474236 | -4.55521 | 0.004715 | 0.089216 | -1.76865 |
| lnc-DPPA4-2:1     | -1.30729 | 2.205277 | -4.55458 | 0.004718 | 0.089216 | -1.76932 |
| ENST00000565366.1 | 1.091365 | 2.874112 | 4.554401 | 0.004719 | 0.089216 | -1.7695  |
| T256976           | 1.577393 | 2.167472 | 4.553997 | 0.00472  | 0.089216 | -1.76993 |
| ENST00000521501.1 | -1.69397 | 2.874626 | -4.55342 | 0.004723 | 0.089216 | -1.77053 |
| NONHSAT198089.1   | 1.929277 | 2.493728 | 4.553172 | 0.004724 | 0.08922  | -1.7708  |
| NONHSAT214905.1   | 1.319083 | 4.208104 | 4.552301 | 0.004728 | 0.089249 | -1.77172 |
| lnc-TMC6-7:1      | 3.093041 | 3.964056 | 4.550272 | 0.004738 | 0.089329 | -1.77386 |
| NONHSAT198371.1   | 1.33834  | 3.916724 | 4.550142 | 0.004739 | 0.089329 | -1.77399 |
| MSTRG.56542.1     | 1.26604  | 3.963273 | 4.548356 | 0.004747 | 0.089432 | -1.77588 |
| lnc-STX4-2:1      | 1.729484 | 2.158601 | 4.547758 | 0.00475  | 0.089435 | -1.77651 |
| MSTRG.14462.1     | -1.39753 | 3.062264 | -4.54624 | 0.004757 | 0.089503 | -1.77811 |
| lnc-SLITRK1-7:1   | 1.755944 | 2.349205 | 4.545004 | 0.004763 | 0.089555 | -1.77942 |
| NONHSAT149085.1   | 2.427589 | 3.160478 | 4.544879 | 0.004763 | 0.089555 | -1.77955 |
| NONHSAT201372.1   | -1.45837 | 3.752081 | -4.5444  | 0.004766 | 0.089567 | -1.78006 |
| NONHSAT218069.1   | 1.104722 | 5.425836 | 4.54212  | 0.004776 | 0.089603 | -1.78247 |
| NONHSAT205571.1   | 1.217958 | 6.799775 | 4.538632 | 0.004793 | 0.089795 | -1.78615 |
| ENST00000655828.1 | 1.013953 | 5.334018 | 4.537101 | 0.0048   | 0.089868 | -1.78777 |
| lnc-MICA-7:1      | 1.563283 | 4.786914 | 4.534453 | 0.004813 | 0.089955 | -1.79058 |
| NONHSAT159023.1   | 1.235609 | 5.590965 | 4.533173 | 0.004819 | 0.090011 | -1.79193 |
| lnc-GFRA2-1:1     | 1.591729 | 1.80938  | 4.533112 | 0.00482  | 0.090011 | -1.79199 |
| ENST00000567234.1 | 1.115954 | 4.208698 | 4.532707 | 0.004821 | 0.090011 | -1.79242 |
| NONHSAT170016.1   | 1.589862 | 2.242546 | 4.531131 | 0.004829 | 0.090011 | -1.79409 |
| lnc-UTS2-10:2     | 1.124514 | 6.631249 | 4.531124 | 0.004829 | 0.090011 | -1.7941  |
| lnc-SAP30-1:2     | 1.80693  | 2.24592  | 4.530483 | 0.004832 | 0.090011 | -1.79478 |
| NONHSAT216652.1   | 1.106577 | 4.541642 | 4.526616 | 0.004851 | 0.090159 | -1.79887 |
| ENST00000411427.3 | -1.19041 | 6.508979 | -4.52548 | 0.004856 | 0.090221 | -1.80007 |
| lnc-RAD23B-12:1   | 3.704826 | 4.60863  | 4.525167 | 0.004858 | 0.090223 | -1.80041 |
| lnc-CIAPIN1-2:1   | -1.50388 | 2.609558 | -4.52436 | 0.004862 | 0.090228 | -1.80127 |

|                   |          |          |          |          |          |          |
|-------------------|----------|----------|----------|----------|----------|----------|
| lnc-LEPROTL1-13:4 | 1.488494 | 2.443748 | 4.523717 | 0.004865 | 0.090228 | -1.80194 |
| lnc-UBE2F-1:1     | 1.01482  | 6.786995 | 4.523012 | 0.004868 | 0.090228 | -1.80269 |
| NONHSAT148578.1   | 1.471388 | 8.779931 | 4.522954 | 0.004869 | 0.090228 | -1.80275 |
| lnc-IRF5-1:1      | -1.56383 | 4.07131  | -4.52192 | 0.004874 | 0.090266 | -1.80385 |
| MSTRG.35898.1     | 1.428924 | 1.802269 | 4.520748 | 0.004879 | 0.090322 | -1.80509 |
| NONHSAT150821.1   | 1.05495  | 3.009315 | 4.520079 | 0.004883 | 0.090324 | -1.8058  |
| NONHSAT184394.1   | 1.870403 | 2.802027 | 4.519031 | 0.004888 | 0.090324 | -1.80691 |
| NONHSAT167631.1   | 1.935348 | 3.313661 | 4.518612 | 0.00489  | 0.090324 | -1.80736 |
| NONHSAT186670.1   | 1.893628 | 2.883575 | 4.518278 | 0.004891 | 0.090324 | -1.80771 |
| ENST00000563103.1 | 1.129269 | 3.511832 | 4.518277 | 0.004891 | 0.090324 | -1.80771 |
| lnc-C10orf82-3:1  | -1.21127 | 2.001014 | -4.51816 | 0.004892 | 0.090324 | -1.80784 |
| NONHSAT195908.1   | -1.73431 | 2.429203 | -4.51753 | 0.004895 | 0.090337 | -1.80851 |
| MSTRG.54720.11    | 1.180531 | 2.313027 | 4.517461 | 0.004895 | 0.090337 | -1.80858 |
| lnc-ANKRD33-4:1   | -1.07586 | 4.394337 | -4.51283 | 0.004918 | 0.090431 | -1.81349 |
| lnc-REEP3-13:2    | -1.09099 | 1.659042 | -4.51245 | 0.00492  | 0.090431 | -1.8139  |
| NONHSAT220543.1   | -1.49792 | 3.104624 | -4.51145 | 0.004925 | 0.090431 | -1.81495 |
| NONHSAT154331.1   | 1.193037 | 4.292352 | 4.511349 | 0.004925 | 0.090431 | -1.81506 |
| NONHSAT218404.1   | 1.322507 | 1.741072 | 4.510939 | 0.004927 | 0.090431 | -1.8155  |
| ENST00000665877.1 | 1.216565 | 1.880246 | 4.510571 | 0.004929 | 0.090431 | -1.81589 |
| lnc-ACTR2-3:28    | 2.106732 | 2.375683 | 4.509942 | 0.004932 | 0.090442 | -1.81656 |
| NONHSAT164821.1   | 1.554481 | 3.454756 | 4.509534 | 0.004934 | 0.090442 | -1.81699 |
| ENST00000427524.1 | -1.17689 | 2.226272 | -4.50911 | 0.004936 | 0.090464 | -1.81744 |
| NONHSAT204222.1   | 1.278902 | 3.561349 | 4.50853  | 0.004939 | 0.090486 | -1.81806 |
| lnc-MYLIP-1:1     | -1.39525 | 4.753602 | -4.50839 | 0.00494  | 0.090486 | -1.81821 |
| NONHSAT208060.1   | -1.21724 | 1.853894 | -4.50826 | 0.004941 | 0.090486 | -1.81834 |
| lnc-RPGRIP1L-2:1  | -1.52502 | 2.012464 | -4.50777 | 0.004943 | 0.090486 | -1.81887 |
| NONHSAT215010.1   | 1.156512 | 2.311938 | 4.506484 | 0.004949 | 0.090488 | -1.82023 |
| NONHSAT167431.1   | 1.318711 | 1.950259 | 4.506229 | 0.004951 | 0.090495 | -1.8205  |
| lnc-SLC1A1-11:1   | 1.007337 | 3.083825 | 4.505042 | 0.004956 | 0.090555 | -1.82176 |
| MSTRG.14612.1     | 1.096198 | 5.065744 | 4.50337  | 0.004965 | 0.090555 | -1.82354 |
| lnc-HTR5A-5:2     | 1.225402 | 4.452639 | 4.503295 | 0.004965 | 0.090555 | -1.82362 |
| NONHSAT183125.1   | 1.275795 | 4.108934 | 4.502549 | 0.004969 | 0.090564 | -1.82441 |
| MSTRG.5689.1      | -1.30024 | 2.876671 | -4.50239 | 0.00497  | 0.090564 | -1.82458 |
| ENST00000575126.1 | 1.091303 | 7.497044 | 4.502097 | 0.004971 | 0.090574 | -1.82489 |
| NONHSAT196524.1   | 1.315406 | 3.864183 | 4.500931 | 0.004977 | 0.090604 | -1.82613 |
| lnc-VTI1A-7:1     | -1.73751 | 2.012305 | -4.50093 | 0.004977 | 0.090604 | -1.82614 |
| NONHSAT166190.1   | 1.557977 | 3.552641 | 4.500027 | 0.004981 | 0.090606 | -1.82709 |
| NONHSAT222224.1   | 1.257969 | 5.386198 | 4.498514 | 0.004989 | 0.090612 | -1.8287  |
| lnc-ATXN1-6:1     | 1.330001 | 5.703144 | 4.498437 | 0.004989 | 0.090612 | -1.82879 |
| NONHSAT211131.1   | 1.282461 | 6.626842 | 4.497296 | 0.004995 | 0.090629 | -1.83    |
| ENST00000665863.1 | -1.30699 | 2.540658 | -4.49659 | 0.004999 | 0.090629 | -1.83075 |
| lnc-ABR-6:4       | -1.1944  | 3.002631 | -4.4951  | 0.005006 | 0.090661 | -1.83234 |
| NONHSAT199304.1   | 1.450528 | 5.75581  | 4.493992 | 0.005012 | 0.090694 | -1.83352 |
| MSTRG.24872.1     | -1.06391 | 2.817233 | -4.49294 | 0.005017 | 0.09072  | -1.83463 |
| NONHSAT197953.1   | 1.545601 | 3.991541 | 4.49205  | 0.005021 | 0.090748 | -1.83558 |
| NONHSAT176880.1   | -1.17586 | 2.81051  | -4.49199 | 0.005022 | 0.090748 | -1.83565 |
| NONHSAT150379.1   | -1.03905 | 6.171033 | -4.49191 | 0.005022 | 0.090748 | -1.83573 |
| NONHSAT157000.1   | 1.793072 | 2.024587 | 4.491192 | 0.005026 | 0.090797 | -1.8365  |

|                   |          |          |          |          |          |          |
|-------------------|----------|----------|----------|----------|----------|----------|
| lnc-WDR11-2:4     | 1.891972 | 2.025047 | 4.490289 | 0.00503  | 0.09083  | -1.83746 |
| NONHSAT177925.1   | 1.004091 | 2.327066 | 4.489899 | 0.005032 | 0.090834 | -1.83787 |
| lnc-SEC22C-2:12   | -1.48371 | 2.37236  | -4.48946 | 0.005034 | 0.090858 | -1.83835 |
| lnc-TOM1L1-4:1    | -1.42282 | 3.351283 | -4.48876 | 0.005038 | 0.090905 | -1.83909 |
| T126419           | 2.456028 | 2.913646 | 4.487205 | 0.005046 | 0.090998 | -1.84074 |
| MSTRG.21497.5     | 1.162118 | 7.408038 | 4.485652 | 0.005054 | 0.091    | -1.8424  |
| lnc-CTXND2-7:2    | -1.42105 | 3.376903 | -4.48558 | 0.005054 | 0.091    | -1.84248 |
| NONHSAT190409.1   | 2.224753 | 3.305059 | 4.484947 | 0.005057 | 0.091041 | -1.84315 |
| NONHSAT161677.1   | 2.271487 | 3.425912 | 4.483501 | 0.005065 | 0.091092 | -1.84469 |
| NONHSAT154642.1   | 1.346397 | 2.650206 | 4.479357 | 0.005086 | 0.091244 | -1.84911 |
| lnc-TOP1-6:1      | 1.205532 | 7.275787 | 4.477563 | 0.005095 | 0.091294 | -1.85103 |
| NONHSAT153499.1   | 1.165544 | 6.711288 | 4.477536 | 0.005095 | 0.091294 | -1.85105 |
| MSTRG.7563.1      | -1.81192 | 2.667554 | -4.47665 | 0.005099 | 0.091294 | -1.852   |
| lnc-NUDT11-4:1    | -1.14832 | 1.734908 | -4.47649 | 0.0051   | 0.091294 | -1.85217 |
| ENST00000563063.1 | 1.652959 | 2.978526 | 4.476242 | 0.005102 | 0.091294 | -1.85244 |
| ENST00000667942.1 | 1.406493 | 2.140561 | 4.475079 | 0.005108 | 0.091294 | -1.85368 |
| NONHSAT203265.1   | 1.896085 | 4.077562 | 4.473164 | 0.005117 | 0.091294 | -1.85572 |
| MSTRG.45517.1     | -2.13091 | 2.637416 | -4.47308 | 0.005118 | 0.091294 | -1.85582 |
| NR_104178         | -1.147   | 5.870671 | -4.47293 | 0.005119 | 0.091294 | -1.85597 |
| lnc-NEFL-6:11     | 1.938294 | 3.04196  | 4.472848 | 0.005119 | 0.091294 | -1.85606 |
| NONHSAT220350.1   | 1.25283  | 3.826313 | 4.472641 | 0.00512  | 0.091294 | -1.85628 |
| NONHSAT211907.1   | 1.681483 | 1.948951 | 4.47215  | 0.005123 | 0.091294 | -1.8568  |
| NONHSAT194125.1   | -1.01041 | 3.60555  | -4.4721  | 0.005123 | 0.091294 | -1.85686 |
| lnc-TBP-10:1      | -1.01132 | 3.103207 | -4.47115 | 0.005128 | 0.091301 | -1.85787 |
| lnc-RNF20-7:1     | 1.176862 | 4.49757  | 4.471146 | 0.005128 | 0.091301 | -1.85788 |
| NONHSAT193879.1   | 2.0459   | 2.544982 | 4.470566 | 0.005131 | 0.091305 | -1.8585  |
| NONHSAT154429.1   | 1.106564 | 7.552694 | 4.470472 | 0.005131 | 0.091305 | -1.8586  |
| NONHSAT205738.1   | 1.583772 | 2.125304 | 4.469596 | 0.005136 | 0.091355 | -1.85953 |
| NONHSAT156376.1   | 1.332147 | 2.339779 | 4.468596 | 0.005141 | 0.09139  | -1.8606  |
| MSTRG.27276.2     | 1.535995 | 2.478306 | 4.467368 | 0.005147 | 0.091453 | -1.86191 |
| lnc-KMT2C-3:2     | 1.55722  | 2.749638 | 4.46652  | 0.005152 | 0.091457 | -1.86282 |
| NONHSAT216300.1   | -1.0765  | 1.635155 | -4.46646 | 0.005152 | 0.091457 | -1.86289 |
| NONHSAT196829.1   | 1.791586 | 2.965104 | 4.466107 | 0.005154 | 0.091474 | -1.86326 |
| lnc-BHLHE22-2:1   | 1.981475 | 3.459832 | 4.464929 | 0.00516  | 0.091476 | -1.86452 |
| lnc-SCN7A-3:1     | 1.545578 | 1.998301 | 4.464871 | 0.00516  | 0.091476 | -1.86458 |
| MSTRG.24026.1     | -1.48688 | 3.588755 | -4.46432 | 0.005163 | 0.091476 | -1.86517 |
| NONHSAT202315.1   | 1.241418 | 4.044791 | 4.46416  | 0.005164 | 0.091476 | -1.86534 |
| NONHSAT154701.1   | 1.066271 | 3.381152 | 4.463786 | 0.005166 | 0.091476 | -1.86574 |
| NONHSAT153713.1   | -1.07248 | 5.237955 | -4.46325 | 0.005169 | 0.091476 | -1.86632 |
| NONHSAT187860.1   | 1.395148 | 4.003085 | 4.463185 | 0.005169 | 0.091476 | -1.86639 |
| lnc-GCN1-1:2      | -1.1515  | 8.60571  | -4.46309 | 0.005169 | 0.091476 | -1.86649 |
| lnc-SCAMP1-6:1    | 1.050153 | 5.172727 | 4.462644 | 0.005172 | 0.091476 | -1.86697 |
| ENST00000550506.2 | 1.093964 | 1.596455 | 4.462207 | 0.005174 | 0.091476 | -1.86743 |
| NONHSAT219667.1   | 2.132744 | 2.618783 | 4.46177  | 0.005176 | 0.091487 | -1.8679  |
| NONHSAT176791.1   | -1.21557 | 2.96171  | -4.46109 | 0.00518  | 0.091501 | -1.86862 |
| MSTRG.55324.1     | 1.76894  | 2.56762  | 4.460245 | 0.005184 | 0.091547 | -1.86953 |
| lnc-ERC1-1:3      | 1.125484 | 5.482435 | 4.45845  | 0.005194 | 0.091601 | -1.87145 |
| NONHSAT161124.1   | -1.31493 | 2.843963 | -4.45827 | 0.005195 | 0.091601 | -1.87165 |

|                   |          |          |          |          |          |          |
|-------------------|----------|----------|----------|----------|----------|----------|
| NONHSAT170869.1   | -1.03983 | 4.155887 | -4.45798 | 0.005196 | 0.091601 | -1.87196 |
| T100137           | -1.08157 | 2.471217 | -4.45764 | 0.005198 | 0.091612 | -1.87232 |
| ENST00000427319.1 | 1.046077 | 4.778706 | 4.45693  | 0.005202 | 0.09165  | -1.87308 |
| NONHSAT171966.1   | -1.37087 | 3.132593 | -4.45542 | 0.00521  | 0.091689 | -1.8747  |
| NONHSAT214521.1   | -1.06655 | 1.701021 | -4.45302 | 0.005222 | 0.091754 | -1.87727 |
| ENST00000484222.1 | 1.750026 | 7.5632   | 4.45271  | 0.005224 | 0.091754 | -1.8776  |
| NONHSAT154545.1   | 1.231141 | 4.997447 | 4.45184  | 0.005228 | 0.091754 | -1.87853 |
| lnc-ABCA9-2:1     | -1.39529 | 3.570347 | -4.44994 | 0.005238 | 0.091761 | -1.88057 |
| MSTRG.18830.2     | 1.455146 | 1.981501 | 4.449845 | 0.005239 | 0.091761 | -1.88067 |
| NONHSAT179509.1   | -1.39745 | 4.235073 | -4.44923 | 0.005242 | 0.091761 | -1.88133 |
| lnc-LRFN5-4:1     | -1.44833 | 3.801509 | -4.44908 | 0.005243 | 0.091761 | -1.88149 |
| NONHSAT175830.1   | 1.063139 | 5.332653 | 4.449    | 0.005243 | 0.091761 | -1.88157 |
| NONHSAT171746.1   | 1.686745 | 7.400278 | 4.448513 | 0.005246 | 0.091761 | -1.8821  |
| NONHSAT222813.1   | 2.814904 | 3.425975 | 4.448502 | 0.005246 | 0.091761 | -1.88211 |
| NONHSAT162176.1   | 1.312358 | 2.65808  | 4.447977 | 0.005249 | 0.091764 | -1.88267 |
| lnc-SIRT4-5:1     | 1.489137 | 4.091664 | 4.447777 | 0.00525  | 0.091764 | -1.88288 |
| lnc-CCNJL-1:3     | 1.103386 | 4.289692 | 4.447447 | 0.005252 | 0.091764 | -1.88324 |
| lnc-TP53TG3F-39:1 | 1.049642 | 4.717432 | 4.447006 | 0.005254 | 0.091764 | -1.88371 |
| lnc-ABI1-11:1     | 2.463213 | 3.395167 | 4.446357 | 0.005257 | 0.091788 | -1.88441 |
| NONHSAT170272.1   | 1.868973 | 2.825604 | 4.4461   | 0.005259 | 0.091788 | -1.88468 |
| lnc-CLCN3-10:1    | 1.136331 | 2.835654 | 4.446062 | 0.005259 | 0.091788 | -1.88472 |
| NONHSAT154421.1   | 1.741342 | 2.327491 | 4.445573 | 0.005261 | 0.091807 | -1.88525 |
| lnc-SCAF8-4:1     | -1.51838 | 3.681071 | -4.44509 | 0.005264 | 0.091807 | -1.88576 |
| MSTRG.67610.1     | 1.459124 | 1.801598 | 4.444954 | 0.005265 | 0.091807 | -1.88591 |
| MSTRG.12454.2     | 2.414435 | 2.945658 | 4.44476  | 0.005266 | 0.091807 | -1.88612 |
| MSTRG.31978.1     | -1.52421 | 2.349243 | -4.44465 | 0.005266 | 0.091807 | -1.88624 |
| MSTRG.45201.1     | 1.682894 | 4.932386 | 4.443434 | 0.005273 | 0.091865 | -1.88754 |
| lnc-GJE1-4:1      | -1.10713 | 4.147343 | -4.442   | 0.00528  | 0.091874 | -1.88908 |
| NONHSAT181849.1   | 2.012962 | 2.510648 | 4.44181  | 0.005281 | 0.091874 | -1.88928 |
| T189967           | 1.092687 | 8.187009 | 4.441459 | 0.005283 | 0.091874 | -1.88966 |
| NONHSAT205770.1   | -1.89225 | 2.178945 | -4.44062 | 0.005288 | 0.091874 | -1.89056 |
| NONHSAT213086.1   | 1.579231 | 2.896486 | 4.439461 | 0.005294 | 0.091874 | -1.8918  |
| MSTRG.19158.1     | 1.049291 | 2.224439 | 4.439422 | 0.005294 | 0.091874 | -1.89185 |
| MSTRG.13498.2     | -1.8341  | 3.251653 | -4.43915 | 0.005296 | 0.091874 | -1.89214 |
| NONHSAT165033.1   | 1.044744 | 1.727417 | 4.438588 | 0.005299 | 0.091879 | -1.89274 |
| NONHSAT221901.1   | -1.64188 | 4.035467 | -4.43858 | 0.005299 | 0.091879 | -1.89275 |
| lnc-GNA12-2:1     | -1.11145 | 4.12701  | -4.43545 | 0.005316 | 0.092009 | -1.89611 |
| NONHSAT161312.1   | -1.71248 | 2.678186 | -4.43478 | 0.005319 | 0.092009 | -1.89683 |
| lnc-CAMSAP1-1:1   | 1.846041 | 4.610613 | 4.434766 | 0.005319 | 0.092009 | -1.89684 |
| lnc-TTLL2-1:1     | 1.665767 | 3.438956 | 4.434733 | 0.005319 | 0.092009 | -1.89688 |
| lnc-CORO6-3:1     | -1.19732 | 5.014042 | -4.43383 | 0.005324 | 0.092012 | -1.89785 |
| lnc-KCNJ15-3:2    | -1.04767 | 5.484056 | -4.43358 | 0.005326 | 0.092012 | -1.89812 |
| lnc-CXADR-7:1     | 1.801202 | 2.910092 | 4.433288 | 0.005327 | 0.092023 | -1.89843 |
| NONHSAT206367.1   | 1.442713 | 5.498073 | 4.432372 | 0.005332 | 0.092049 | -1.89942 |
| ENST00000583148.1 | -1.39698 | 1.769806 | -4.43135 | 0.005338 | 0.092097 | -1.90052 |
| NONHSAT191778.1   | 1.021511 | 5.911768 | 4.431276 | 0.005338 | 0.092097 | -1.90059 |
| ENST00000641784.1 | 2.106526 | 9.29331  | 4.43104  | 0.005339 | 0.092097 | -1.90085 |
| NONHSAT186349.1   | 1.956363 | 2.528836 | 4.428835 | 0.005351 | 0.092228 | -1.90322 |

|                   |          |          |          |          |          |          |
|-------------------|----------|----------|----------|----------|----------|----------|
| lnc-CCDC198-3:1   | -1.04008 | 4.07542  | -4.42782 | 0.005357 | 0.092228 | -1.90431 |
| NONHSAT210744.1   | 1.056647 | 4.933044 | 4.427233 | 0.00536  | 0.092228 | -1.90494 |
| NONHSAT154112.1   | -1.20353 | 3.138743 | -4.42714 | 0.00536  | 0.092228 | -1.90504 |
| lnc-ZNF322-6:1    | -1.51941 | 2.545263 | -4.42693 | 0.005361 | 0.092228 | -1.90527 |
| ENST00000496488.1 | -1.5011  | 2.24038  | -4.42593 | 0.005367 | 0.092228 | -1.90634 |
| NONHSAT207493.1   | -1.49749 | 2.037825 | -4.42583 | 0.005367 | 0.092228 | -1.90645 |
| NONHSAT187499.1   | 1.456696 | 2.107286 | 4.42558  | 0.005369 | 0.092228 | -1.90672 |
| lnc-MYBPC1-1:1    | -1.3349  | 4.048116 | -4.42551 | 0.005369 | 0.092228 | -1.90679 |
| NONHSAT187272.1   | 1.053555 | 1.593424 | 4.42248  | 0.005386 | 0.092399 | -1.91005 |
| NONHSAT165848.1   | -1.4362  | 3.162328 | -4.42234 | 0.005386 | 0.092399 | -1.9102  |
| NONHSAT202334.1   | 1.943218 | 2.341627 | 4.422251 | 0.005387 | 0.092399 | -1.9103  |
| lnc-KRTAP20-3-1:1 | 1.231458 | 1.716257 | 4.42205  | 0.005388 | 0.092399 | -1.91052 |
| LINC02105:7       | 1.466592 | 2.622051 | 4.421651 | 0.00539  | 0.092399 | -1.91094 |
| NONHSAT201887.1   | 1.444738 | 3.471983 | 4.421193 | 0.005393 | 0.092399 | -1.91144 |
| NONHSAT178740.1   | -1.04588 | 6.020078 | -4.42069 | 0.005395 | 0.092399 | -1.91198 |
| NONHSAT217991.1   | 1.658546 | 3.683848 | 4.420642 | 0.005396 | 0.092399 | -1.91203 |
| lnc-ULBP2-4:1     | 1.218705 | 3.956246 | 4.420084 | 0.005399 | 0.092399 | -1.91263 |
| NONHSAT207110.1   | 1.058281 | 1.582255 | 4.417394 | 0.005413 | 0.092399 | -1.91553 |
| lnc-SLC7A11-4:1   | 1.459971 | 1.841258 | 4.416871 | 0.005416 | 0.092399 | -1.91609 |
| NONHSAT187224.1   | 1.421015 | 1.819475 | 4.416071 | 0.005421 | 0.092399 | -1.91695 |
| lnc-DNAAF1-6:1    | 1.029585 | 1.624651 | 4.415545 | 0.005424 | 0.092399 | -1.91752 |
| lnc-ACHE-3:1      | -1.13758 | 5.180552 | -4.41509 | 0.005426 | 0.092399 | -1.91801 |
| NONHSAT192321.1   | -1.27732 | 3.424424 | -4.41492 | 0.005427 | 0.092399 | -1.91819 |
| NR_027003         | 1.508665 | 2.160054 | 4.414903 | 0.005427 | 0.092399 | -1.91821 |
| T213082           | -1.20685 | 2.379063 | -4.41475 | 0.005428 | 0.092399 | -1.91838 |
| MSTRG.67056.1     | 1.177045 | 4.390673 | 4.414197 | 0.005431 | 0.092399 | -1.91897 |
| NONHSAT196024.1   | -2.04195 | 2.964204 | -4.41392 | 0.005433 | 0.092399 | -1.91927 |
| MSTRG.12621.2     | -1.82786 | 3.080377 | -4.41309 | 0.005437 | 0.09245  | -1.92017 |
| lnc-SLC7A3-4:1    | -1.17182 | 4.35594  | -4.41214 | 0.005442 | 0.092477 | -1.92119 |
| ENST00000438619.1 | 1.94165  | 2.454966 | 4.411689 | 0.005445 | 0.092488 | -1.92167 |
| ENST00000658340.1 | -1.36009 | 2.35696  | -4.41128 | 0.005447 | 0.092503 | -1.92212 |
| lnc-MRFAP1L1-4:1  | -1.14641 | 1.676302 | -4.40979 | 0.005455 | 0.092541 | -1.92372 |
| MSTRG.58571.1     | -1.18583 | 1.691276 | -4.40834 | 0.005463 | 0.092599 | -1.92528 |
| NONHSAT207259.1   | 1.110709 | 3.668876 | 4.407657 | 0.005467 | 0.092648 | -1.92602 |
| MSTRG.17905.1     | 1.178862 | 1.604749 | 4.406787 | 0.005472 | 0.092699 | -1.92696 |
| NR_036575         | -1.34822 | 3.182032 | -4.40629 | 0.005475 | 0.092708 | -1.9275  |
| ENST00000652985.1 | -1.00967 | 4.145112 | -4.40518 | 0.005481 | 0.092719 | -1.9287  |
| MSTRG.24706.61    | 1.080576 | 7.779452 | 4.405062 | 0.005482 | 0.092719 | -1.92882 |
| lnc-TENM3-1:1     | 1.036828 | 4.335502 | 4.403394 | 0.005491 | 0.092719 | -1.93062 |
| lnc-CHD2-12:1     | -1.6062  | 3.144324 | -4.40306 | 0.005493 | 0.092719 | -1.93098 |
| NONHSAT185730.1   | 2.324635 | 2.796325 | 4.402777 | 0.005494 | 0.092719 | -1.93128 |
| ENST00000564696.1 | 1.196972 | 3.716513 | 4.402701 | 0.005495 | 0.092719 | -1.93137 |
| NONHSAT161321.1   | -1.47297 | 1.830913 | -4.40263 | 0.005495 | 0.092719 | -1.93144 |
| ENST00000662749.1 | 1.027678 | 4.11579  | 4.402269 | 0.005497 | 0.092719 | -1.93183 |
| lnc-TMEM18-20:1   | -1.20363 | 3.63658  | -4.40108 | 0.005504 | 0.092778 | -1.93311 |
| NONHSAT207865.1   | 1.82427  | 2.767157 | 4.401051 | 0.005504 | 0.092778 | -1.93315 |
| NONHSAT152939.1   | -1.27789 | 2.275831 | -4.40045 | 0.005507 | 0.092795 | -1.93379 |
| ENST00000668860.1 | 1.361171 | 2.013065 | 4.400311 | 0.005508 | 0.092795 | -1.93395 |

|                   |          |          |          |          |          |          |
|-------------------|----------|----------|----------|----------|----------|----------|
| NONHSAT219335.1   | -2.09178 | 2.485814 | -4.39933 | 0.005513 | 0.092837 | -1.935   |
| NONHSAT160171.1   | -1.10512 | 2.098882 | -4.39912 | 0.005515 | 0.092837 | -1.93524 |
| NR_024004         | 1.005443 | 8.733132 | 4.399047 | 0.005515 | 0.092837 | -1.93531 |
| NONHSAT201749.1   | 1.136258 | 1.681668 | 4.396836 | 0.005527 | 0.092968 | -1.9377  |
| lnc-ENC1-3:1      | -2.08481 | 2.678273 | -4.39611 | 0.005532 | 0.092982 | -1.93848 |
| NONHSAT218317.1   | 1.722512 | 2.772186 | 4.395296 | 0.005536 | 0.092999 | -1.93936 |
| T190918           | 1.286082 | 1.73043  | 4.394827 | 0.005539 | 0.093002 | -1.93987 |
| NONHSAT157297.1   | -1.30786 | 3.025951 | -4.39415 | 0.005543 | 0.093031 | -1.9406  |
| MSTRG.15403.1     | 1.117868 | 4.012986 | 4.394032 | 0.005543 | 0.093031 | -1.94073 |
| NONHSAT161538.1   | 1.172068 | 2.998158 | 4.393    | 0.005549 | 0.093081 | -1.94184 |
| NONHSAT204076.1   | 1.430374 | 2.398985 | 4.391565 | 0.005557 | 0.093119 | -1.94339 |
| NONHSAT188001.1   | 1.265853 | 4.279885 | 4.391298 | 0.005559 | 0.093119 | -1.94368 |
| lnc-FANCL-2:2     | 1.588722 | 1.818815 | 4.390178 | 0.005565 | 0.093179 | -1.94489 |
| lnc-PHLDA3-2:1    | 1.281573 | 3.968469 | 4.389989 | 0.005566 | 0.093179 | -1.9451  |
| lnc-APPBP2-6:1    | -1.34223 | 3.325443 | -4.38896 | 0.005572 | 0.093179 | -1.94621 |
| lnc-DDX3X-7:1     | -1.17221 | 3.286983 | -4.38826 | 0.005576 | 0.093179 | -1.94696 |
| lnc-DNAJC24-5:1   | -1.34241 | 3.018471 | -4.38769 | 0.005579 | 0.093179 | -1.94758 |
| NONHSAT210312.1   | 1.677017 | 2.814494 | 4.387562 | 0.00558  | 0.093179 | -1.94772 |
| NONHSAT205558.1   | -1.39346 | 2.951359 | -4.38706 | 0.005583 | 0.093179 | -1.94827 |
| MSTRG.34381.11    | 1.748372 | 3.571801 | 4.386998 | 0.005583 | 0.093179 | -1.94833 |
| LINC02357:8       | 1.625347 | 2.262533 | 4.386769 | 0.005584 | 0.093179 | -1.94858 |
| ENST00000454723.2 | -1.91914 | 2.716092 | -4.38675 | 0.005584 | 0.093179 | -1.9486  |
| NONHSAT201297.1   | 1.227597 | 5.827887 | 4.386597 | 0.005585 | 0.093179 | -1.94877 |
| lnc-CDYL-14:1     | 1.114193 | 6.195834 | 4.38659  | 0.005585 | 0.093179 | -1.94877 |
| ENST00000562814.1 | 1.393235 | 2.428635 | 4.385823 | 0.00559  | 0.093209 | -1.9496  |
| ENST00000504650.2 | 1.148049 | 3.880427 | 4.385458 | 0.005592 | 0.093209 | -1.95    |
| LINC00114:9       | 1.184534 | 1.706028 | 4.385001 | 0.005594 | 0.093209 | -1.95049 |
| lnc-RAB11FIP4-8:1 | 1.087485 | 3.824228 | 4.384761 | 0.005596 | 0.093209 | -1.95075 |
| NONHSAT151203.1   | 1.093889 | 1.586259 | 4.384638 | 0.005596 | 0.093209 | -1.95089 |
| NONHSAT166131.1   | 1.280803 | 3.32616  | 4.383471 | 0.005603 | 0.093209 | -1.95215 |
| ENST00000667238.1 | 1.249823 | 7.147965 | 4.382979 | 0.005606 | 0.093209 | -1.95268 |
| lnc-WRNIP1-28:1   | -1.15826 | 1.690233 | -4.38254 | 0.005608 | 0.093209 | -1.95315 |
| ENST00000663358.1 | 1.841202 | 2.414893 | 4.380679 | 0.005619 | 0.09332  | -1.95517 |
| MSTRG.21244.1     | -1.06512 | 4.607028 | -4.37987 | 0.005624 | 0.093355 | -1.95605 |
| lnc-SLC39A11-6:1  | 1.25343  | 2.282932 | 4.379702 | 0.005625 | 0.093356 | -1.95623 |
| lnc-UTY-15:1      | 1.135769 | 5.269083 | 4.377206 | 0.005639 | 0.09347  | -1.95893 |
| MSTRG.19443.2     | 1.838491 | 2.003536 | 4.375895 | 0.005646 | 0.093549 | -1.96035 |
| ENST00000567718.1 | 1.523235 | 2.198587 | 4.375355 | 0.00565  | 0.09356  | -1.96094 |
| NONHSAT173855.1   | 1.731132 | 2.338268 | 4.373908 | 0.005658 | 0.093599 | -1.96251 |
| MSTRG.62501.1     | 1.484183 | 3.50972  | 4.37291  | 0.005664 | 0.093634 | -1.96359 |
| lnc-HEXA-1:1      | -1.65492 | 2.766326 | -4.37231 | 0.005667 | 0.093638 | -1.96423 |
| NONHSAT169353.1   | 1.257247 | 2.456377 | 4.370586 | 0.005677 | 0.093701 | -1.96611 |
| ENST00000443018.2 | 1.657669 | 2.217119 | 4.370137 | 0.00568  | 0.093701 | -1.9666  |
| NONHSAT155095.1   | -1.13947 | 2.141446 | -4.36963 | 0.005683 | 0.093701 | -1.96714 |
| MSTRG.64377.1     | 1.023423 | 4.638305 | 4.369214 | 0.005685 | 0.093709 | -1.9676  |
| NONHSAT181450.1   | -1.26167 | 2.336153 | -4.36888 | 0.005687 | 0.093712 | -1.96796 |
| MSTRG.22908.3     | -1.02374 | 3.501768 | -4.3682  | 0.005691 | 0.093731 | -1.9687  |
| lnc-DAZ1-166:2    | -1.82312 | 2.661556 | -4.36653 | 0.005701 | 0.093821 | -1.97051 |

|                    |          |          |          |          |          |          |
|--------------------|----------|----------|----------|----------|----------|----------|
| ENST00000504365.1  | 1.50576  | 2.133955 | 4.365562 | 0.005706 | 0.093861 | -1.97156 |
| ENST00000663591.1  | 1.089602 | 3.64256  | 4.364692 | 0.005711 | 0.093886 | -1.9725  |
| lnc-ZC3HAV1-2:1    | 1.645812 | 2.147655 | 4.364658 | 0.005712 | 0.093886 | -1.97254 |
| NONHSAT164372.1    | -1.39937 | 2.149578 | -4.36449 | 0.005712 | 0.093887 | -1.97272 |
| T341075            | -1.41083 | 3.148023 | -4.36422 | 0.005714 | 0.093897 | -1.97301 |
| NONHSAT170717.1    | -1.36999 | 4.69176  | -4.36375 | 0.005717 | 0.093912 | -1.97353 |
| lnc-CAB39L-8:4     | 1.451662 | 2.401701 | 4.362394 | 0.005725 | 0.09398  | -1.975   |
| MSTRG.18542.1      | -1.41203 | 2.279345 | -4.36114 | 0.005732 | 0.094024 | -1.97636 |
| lnc-PEX16-4:1      | -1.43784 | 2.411667 | -4.36072 | 0.005734 | 0.094044 | -1.97681 |
| lnc-SLC6A3-1:1     | 1.378086 | 4.299295 | 4.360612 | 0.005735 | 0.094044 | -1.97693 |
| ENST00000560375.5  | 1.168936 | 1.60415  | 4.359904 | 0.005739 | 0.094066 | -1.9777  |
| NR_125401          | 1.391671 | 4.608786 | 4.359198 | 0.005743 | 0.094104 | -1.97847 |
| NONHSAT162721.1    | 1.238294 | 2.115169 | 4.357002 | 0.005756 | 0.094254 | -1.98085 |
| MSTRG.47596.1      | -1.03847 | 3.342528 | -4.3563  | 0.00576  | 0.094266 | -1.98161 |
| ENST00000670607.1  | 1.058283 | 4.455727 | 4.356189 | 0.005761 | 0.094266 | -1.98174 |
| NR_015445          | -1.17116 | 5.172299 | -4.35518 | 0.005767 | 0.094266 | -1.98283 |
| MSTRG.49157.1      | -1.42112 | 3.388773 | -4.35517 | 0.005767 | 0.094266 | -1.98285 |
| NONHSAT213696.1    | -1.04518 | 3.927613 | -4.35513 | 0.005767 | 0.094266 | -1.98288 |
| NONHSAT179204.1    | 1.131139 | 4.68231  | 4.354376 | 0.005772 | 0.094292 | -1.98371 |
| T016619            | -1.3062  | 3.049279 | -4.35373 | 0.005776 | 0.094317 | -1.98441 |
| MSTRG.23228.1      | 1.369188 | 2.305662 | 4.353615 | 0.005776 | 0.094317 | -1.98453 |
| LINC02535:17       | -1.12575 | 4.389475 | -4.35349 | 0.005777 | 0.094317 | -1.98467 |
| NONHSAT158543.1    | -1.28739 | 3.836601 | -4.35248 | 0.005783 | 0.094335 | -1.98577 |
| lnc-PPM1M-2:5      | -1.64477 | 2.330971 | -4.35235 | 0.005784 | 0.094335 | -1.98591 |
| NONHSAT191418.1    | 1.439696 | 4.989363 | 4.351438 | 0.005789 | 0.094377 | -1.9869  |
| ENST00000504357.1  | -1.27445 | 2.363905 | -4.35031 | 0.005796 | 0.094386 | -1.98813 |
| lnc-PTGES-2:1      | 1.323609 | 4.347956 | 4.350251 | 0.005796 | 0.094386 | -1.98819 |
| NONHSAT218194.1    | -1.07067 | 3.154669 | -4.35013 | 0.005797 | 0.094386 | -1.98832 |
| MSTRG.12812.1      | 1.116809 | 3.661474 | 4.350081 | 0.005797 | 0.094386 | -1.98838 |
| MSTRG.11047.2      | 1.110424 | 3.666764 | 4.349723 | 0.005799 | 0.09439  | -1.98877 |
| lnc-TMEM243-2:1    | -1.08026 | 3.156655 | -4.34865 | 0.005806 | 0.094471 | -1.98993 |
| ENST00000329015.2  | -1.04178 | 2.887465 | -4.3481  | 0.005809 | 0.094471 | -1.99054 |
| ENST00000661716.1  | 1.247762 | 4.532111 | 4.347552 | 0.005812 | 0.094478 | -1.99113 |
| MSTRG.41651.1      | 1.236091 | 2.278028 | 4.345828 | 0.005822 | 0.094567 | -1.99301 |
| lnc-TRIM32-6:1     | 1.292813 | 3.844508 | 4.345215 | 0.005826 | 0.094567 | -1.99367 |
| NONHSAT175983.1    | -1.2839  | 5.834248 | -4.34488 | 0.005828 | 0.094584 | -1.99404 |
| NONHSAT198952.1    | -1.64326 | 2.505486 | -4.3431  | 0.005839 | 0.094695 | -1.99597 |
| MSTRG.34193.1      | 1.477262 | 2.140131 | 4.34283  | 0.00584  | 0.0947   | -1.99627 |
| NONHSAT154003.1    | 1.313486 | 3.266654 | 4.340972 | 0.005851 | 0.094824 | -1.99829 |
| ENST00000420828.1  | -1.3866  | 1.976692 | -4.34078 | 0.005853 | 0.094824 | -1.9985  |
| lnc-ZCCHC17-8:1    | -1.76688 | 2.631214 | -4.33991 | 0.005858 | 0.094831 | -1.99945 |
| ENST00000479822.2  | 1.711996 | 3.583284 | 4.339108 | 0.005863 | 0.094832 | -2.00032 |
| lnc-SLX4IP-5:2     | 1.027346 | 1.635894 | 4.337494 | 0.005872 | 0.09495  | -2.00208 |
| ENST00000428485.1  | -1.15596 | 2.060351 | -4.33724 | 0.005874 | 0.094959 | -2.00236 |
| NONHSAT209770.1    | 2.114313 | 2.484138 | 4.336222 | 0.00588  | 0.094994 | -2.00347 |
| NONHSAT162467.1    | 1.042691 | 4.749603 | 4.335701 | 0.005883 | 0.094996 | -2.00404 |
| NONHSAT215171.1    | 1.975471 | 3.005678 | 4.335518 | 0.005884 | 0.094996 | -2.00423 |
| lnc-HNRNPA2B1-12:1 | 1.047155 | 5.636306 | 4.334959 | 0.005888 | 0.095004 | -2.00484 |

|                   |          |          |          |          |          |          |
|-------------------|----------|----------|----------|----------|----------|----------|
| MSTRG.29893.2     | -1.44556 | 2.964092 | -4.33412 | 0.005893 | 0.09502  | -2.00576 |
| NONHSAT224126.1   | -1.27533 | 3.166924 | -4.33335 | 0.005897 | 0.095027 | -2.00659 |
| lnc-COX10-7:1     | -1.18376 | 1.999072 | -4.33327 | 0.005898 | 0.095027 | -2.00668 |
| lnc-ACR10-6:1     | -1.47979 | 3.402814 | -4.33201 | 0.005905 | 0.095078 | -2.00806 |
| NR_024604         | -1.10045 | 4.719334 | -4.329   | 0.005924 | 0.095188 | -2.01134 |
| NONHSAT164533.1   | -1.79207 | 2.05604  | -4.32824 | 0.005928 | 0.095188 | -2.01217 |
| lnc-KCNS2-4:3     | -1.15708 | 1.789738 | -4.32804 | 0.005929 | 0.095188 | -2.0124  |
| lnc-TTL7-11:1     | 1.266084 | 3.503922 | 4.325594 | 0.005944 | 0.095275 | -2.01506 |
| lnc-SPINT2-8:1    | -1.34215 | 4.453115 | -4.32421 | 0.005953 | 0.095365 | -2.01657 |
| NONHSAT152290.1   | -1.37505 | 1.87647  | -4.32286 | 0.005961 | 0.095406 | -2.01805 |
| ENST00000655634.1 | 1.010915 | 1.814345 | 4.322678 | 0.005962 | 0.095409 | -2.01825 |
| NONHSAT197747.1   | 1.837695 | 3.96546  | 4.322448 | 0.005964 | 0.095413 | -2.0185  |
| NONHSAT186107.1   | -1.40696 | 2.673681 | -4.32171 | 0.005968 | 0.095413 | -2.0193  |
| NONHSAT193956.1   | 1.134186 | 1.949168 | 4.321267 | 0.005971 | 0.095427 | -2.01979 |
| lnc-KCNV2-4:1     | -1.31619 | 3.012708 | -4.32058 | 0.005975 | 0.095463 | -2.02054 |
| MSTRG.49845.3     | 1.356788 | 3.625157 | 4.319761 | 0.00598  | 0.095503 | -2.02143 |
| NONHSAT216546.1   | -1.09139 | 1.716871 | -4.3162  | 0.006002 | 0.09572  | -2.02532 |
| NONHSAT178542.1   | 1.42675  | 1.995792 | 4.315975 | 0.006003 | 0.09572  | -2.02557 |
| NONHSAT164680.1   | 1.316797 | 2.701031 | 4.315952 | 0.006003 | 0.09572  | -2.02559 |
| NONHSAT204898.1   | -1.80646 | 3.603002 | -4.31564 | 0.006005 | 0.09572  | -2.02593 |
| MSTRG.44205.1     | -1.07868 | 3.780819 | -4.31546 | 0.006006 | 0.09572  | -2.02613 |
| lnc-DHTKD1-2:1    | 1.031721 | 3.4889   | 4.314959 | 0.00601  | 0.09572  | -2.02668 |
| lnc-KCNG3-2:1     | -1.6015  | 3.176078 | -4.31476 | 0.006011 | 0.09572  | -2.02689 |
| lnc-HIST1H4D-2:1  | -1.80395 | 3.521481 | -4.3142  | 0.006014 | 0.095735 | -2.02751 |
| ENST00000572067.1 | -1.2136  | 2.906953 | -4.31399 | 0.006016 | 0.095735 | -2.02774 |
| lnc-GPR135-2:1    | -1.19149 | 2.691243 | -4.31386 | 0.006016 | 0.095735 | -2.02788 |
| NONHSAT183373.1   | 1.274619 | 4.785295 | 4.313127 | 0.006021 | 0.095735 | -2.02868 |
| lnc-NAA38-2:2     | -1.49492 | 3.041964 | -4.31239 | 0.006025 | 0.095742 | -2.02949 |
| NONHSAT180303.1   | 1.644538 | 2.202745 | 4.31174  | 0.00603  | 0.095742 | -2.0302  |
| MSTRG.36212.1     | 1.14347  | 4.360425 | 4.311491 | 0.006031 | 0.095743 | -2.03047 |
| ENST00000670726.1 | -1.30317 | 1.735918 | -4.31142 | 0.006031 | 0.095743 | -2.03055 |
| NONHSAT161153.1   | -1.39943 | 1.888654 | -4.31083 | 0.006035 | 0.095768 | -2.03119 |
| NONHSAT153090.1   | -1.08149 | 3.319539 | -4.31063 | 0.006036 | 0.095768 | -2.03141 |
| NONHSAT221701.1   | 1.058251 | 5.923513 | 4.310375 | 0.006038 | 0.095768 | -2.03169 |
| lnc-POU6F2-1:1    | 2.23585  | 3.410288 | 4.310141 | 0.006039 | 0.095768 | -2.03195 |
| NONHSAT148636.1   | 1.188184 | 2.961446 | 4.310101 | 0.00604  | 0.095768 | -2.03199 |
| ENST00000611525.1 | 1.57255  | 2.398345 | 4.309383 | 0.006044 | 0.095779 | -2.03278 |
| NONHSAT157970.1   | 1.181453 | 3.902246 | 4.309333 | 0.006044 | 0.095779 | -2.03283 |
| lnc-CPQ-4:1       | -1.80371 | 2.456629 | -4.30915 | 0.006046 | 0.095779 | -2.03303 |
| NONHSAT164714.1   | 1.417631 | 2.931761 | 4.309067 | 0.006046 | 0.095779 | -2.03313 |
| NONHSAT210251.1   | 1.880187 | 3.213144 | 4.309065 | 0.006046 | 0.095779 | -2.03313 |
| ENST00000658843.1 | 1.581188 | 3.044421 | 4.307739 | 0.006054 | 0.09585  | -2.03458 |
| LINC01384:1       | -2.05456 | 3.820052 | -4.30623 | 0.006064 | 0.095938 | -2.03623 |
| lnc-ZNF491-1:1    | -1.07949 | 4.284413 | -4.30506 | 0.006071 | 0.096006 | -2.03751 |
| NONHSAT177475.1   | 1.233222 | 4.756517 | 4.303853 | 0.006079 | 0.09606  | -2.03883 |
| MSTRG.60097.1     | 2.241704 | 3.76031  | 4.303609 | 0.00608  | 0.09606  | -2.0391  |
| T245853           | -1.21124 | 3.729695 | -4.30309 | 0.006083 | 0.096082 | -2.03967 |
| NONHSAT187841.1   | 1.693758 | 4.12885  | 4.30272  | 0.006086 | 0.096084 | -2.04007 |



|                   |          |          |          |          |          |          |
|-------------------|----------|----------|----------|----------|----------|----------|
| ENST00000528696.3 | 1.212826 | 3.696406 | 4.302171 | 0.006089 | 0.096089 | -2.04068 |
| lnc-UCP3-6:1      | -1.16429 | 2.539489 | -4.30182 | 0.006091 | 0.096089 | -2.04106 |
| NONHSAT186397.1   | 1.113239 | 1.901484 | 4.30048  | 0.0061   | 0.096099 | -2.04253 |
| lnc-API5-9:1      | -1.29362 | 3.187334 | -4.30004 | 0.006102 | 0.096099 | -2.04301 |
| ENST00000562989.1 | -1.18205 | 4.879718 | -4.29988 | 0.006103 | 0.096099 | -2.04318 |
| ENST00000657264.1 | 2.501379 | 3.719683 | 4.298658 | 0.006111 | 0.096133 | -2.04453 |
| NONHSAT187963.1   | -1.25736 | 4.388246 | -4.29834 | 0.006113 | 0.096133 | -2.04487 |
| MSTRG.42851.1     | -1.14836 | 2.406721 | -4.29814 | 0.006114 | 0.096133 | -2.0451  |
| MSTRG.21093.1     | 1.067741 | 2.521285 | 4.298085 | 0.006115 | 0.096133 | -2.04515 |
| NONHSAT153306.1   | -1.08774 | 2.018774 | -4.29808 | 0.006115 | 0.096133 | -2.04516 |
| ENST00000581636.1 | -1.14634 | 4.935919 | -4.29729 | 0.00612  | 0.096133 | -2.04603 |
| NONHSAT201818.1   | 1.177168 | 5.588157 | 4.29698  | 0.006122 | 0.096133 | -2.04636 |
| lnc-TRAM1L1-4:1   | 1.578947 | 3.011588 | 4.296978 | 0.006122 | 0.096133 | -2.04637 |
| NONHSAT214019.1   | -1.74103 | 2.756673 | -4.2959  | 0.006129 | 0.096209 | -2.04755 |
| ENST00000608131.1 | -1.15646 | 3.541648 | -4.29427 | 0.006139 | 0.096274 | -2.04934 |
| NONHSAT171724.1   | 2.055843 | 2.395056 | 4.292932 | 0.006147 | 0.096274 | -2.0508  |
| lnc-CPEB4-5:2     | 1.375749 | 2.006574 | 4.292682 | 0.006149 | 0.096274 | -2.05108 |
| ENST00000457647.2 | 1.01306  | 5.095513 | 4.292678 | 0.006149 | 0.096274 | -2.05108 |
| NONHSAT163966.1   | 1.625183 | 5.50738  | 4.29131  | 0.006158 | 0.096386 | -2.05258 |
| ENST00000608748.1 | -1.10464 | 5.807349 | -4.29007 | 0.006166 | 0.096422 | -2.05395 |
| NONHSAT168332.1   | -1.30533 | 2.09256  | -4.28957 | 0.006169 | 0.096422 | -2.05449 |
| MSTRG.65628.1     | -1.46816 | 2.293401 | -4.28941 | 0.00617  | 0.096422 | -2.05467 |
| LINC01341:4       | 1.340095 | 4.630138 | 4.289288 | 0.00617  | 0.096422 | -2.0548  |
| NONHSAT164410.1   | -1.07977 | 1.656004 | -4.28853 | 0.006175 | 0.09645  | -2.05563 |
| lnc-C5orf47-2:1   | 1.138744 | 4.314705 | 4.2885   | 0.006175 | 0.09645  | -2.05567 |
| T017889           | 1.274316 | 1.786199 | 4.287748 | 0.00618  | 0.09651  | -2.05649 |
| MSTRG.6310.1      | 2.302418 | 3.377347 | 4.28594  | 0.006192 | 0.09663  | -2.05848 |
| NONHSAT220918.1   | 1.742711 | 2.727097 | 4.284258 | 0.006203 | 0.096708 | -2.06033 |
| NONHSAT149352.1   | 2.084418 | 2.680586 | 4.282653 | 0.006213 | 0.096794 | -2.06209 |
| NONHSAT196291.1   | -1.17078 | 5.302318 | -4.2825  | 0.006214 | 0.096794 | -2.06225 |
| MSTRG.34330.1     | 1.692132 | 4.275478 | 4.280937 | 0.006224 | 0.096899 | -2.06397 |
| NONHSAT198479.1   | -1.31062 | 4.401543 | -4.28055 | 0.006226 | 0.096899 | -2.0644  |
| NONHSAT194176.1   | 1.686752 | 3.884659 | 4.28026  | 0.006228 | 0.096913 | -2.06472 |
| ENST00000436429.1 | -1.3035  | 3.248176 | -4.27863 | 0.006239 | 0.097017 | -2.06651 |
| NONHSAT187763.1   | -1.10534 | 1.789776 | -4.27827 | 0.006241 | 0.097021 | -2.0669  |
| NONHSAT222125.1   | 1.527093 | 2.06309  | 4.277731 | 0.006245 | 0.097036 | -2.0675  |
| lnc-RD3-6:1       | 1.186122 | 2.720004 | 4.277542 | 0.006246 | 0.097036 | -2.06771 |
| NONHSAT172383.1   | -1.04947 | 3.665917 | -4.27722 | 0.006248 | 0.097052 | -2.06806 |
| RNASEH1-AS1:26    | 1.342604 | 2.501246 | 4.275831 | 0.006257 | 0.097128 | -2.06959 |
| lnc-HMGB2-8:1     | -1.35738 | 2.594873 | -4.27572 | 0.006258 | 0.097128 | -2.06971 |
| NONHSAT198283.1   | 2.238436 | 2.749366 | 4.274869 | 0.006263 | 0.097159 | -2.07064 |
| ENST00000379963.1 | 1.638416 | 4.337548 | 4.272794 | 0.006276 | 0.097302 | -2.07293 |
| NONHSAT189814.1   | 1.52129  | 1.859208 | 4.272652 | 0.006277 | 0.097302 | -2.07308 |
| lnc-TRPV6-3:1     | 1.395715 | 5.917964 | 4.272449 | 0.006279 | 0.097308 | -2.07331 |
| NONHSAT165135.1   | 1.372726 | 2.436107 | 4.270206 | 0.006293 | 0.097384 | -2.07578 |
| ENST00000645861.1 | 1.169902 | 4.80016  | 4.26806  | 0.006307 | 0.097387 | -2.07814 |
| NONHSAT210654.1   | 1.03163  | 1.635644 | 4.26677  | 0.006316 | 0.097454 | -2.07956 |
| ENST00000532849.1 | 1.305716 | 5.722323 | 4.266251 | 0.006319 | 0.097469 | -2.08013 |

|                   |          |          |          |          |          |          |
|-------------------|----------|----------|----------|----------|----------|----------|
| NONHSAT201718.1   | 1.210649 | 6.677796 | 4.265847 | 0.006322 | 0.09748  | -2.08058 |
| lnc-ABCE1-1:1     | -1.09744 | 5.674425 | -4.26566 | 0.006323 | 0.097484 | -2.08078 |
| MSTRG.53117.1     | 1.409467 | 3.246864 | 4.2652   | 0.006326 | 0.097512 | -2.08129 |
| ENST00000667961.1 | -1.37641 | 3.38164  | -4.26491 | 0.006328 | 0.097515 | -2.08161 |
| lnc-SP4-4:1       | 1.476554 | 2.681538 | 4.264341 | 0.006332 | 0.097533 | -2.08223 |
| ENST00000515670.1 | -1.19607 | 4.409316 | -4.26429 | 0.006332 | 0.097533 | -2.08229 |
| NONHSAT162506.1   | 1.38368  | 3.929667 | 4.263195 | 0.006339 | 0.097544 | -2.0835  |
| NONHSAT154057.1   | 1.634905 | 2.191198 | 4.263064 | 0.00634  | 0.097544 | -2.08364 |
| lnc-RC3H1-1:9     | 1.00212  | 3.794323 | 4.26289  | 0.006341 | 0.097544 | -2.08383 |
| NONHSAT158400.1   | 2.09205  | 2.583789 | 4.261915 | 0.006347 | 0.097579 | -2.08491 |
| NONHSAT170032.1   | 1.530404 | 2.600278 | 4.261664 | 0.006349 | 0.097585 | -2.08518 |
| MSTRG.25374.4     | -1.21826 | 2.718553 | -4.26156 | 0.00635  | 0.097585 | -2.0853  |
| MSTRG.59236.32    | -1.04277 | 1.638582 | -4.26112 | 0.006353 | 0.097615 | -2.08579 |
| NONHSAT153933.1   | -1.59946 | 1.944347 | -4.25929 | 0.006365 | 0.097648 | -2.0878  |
| NONHSAT153829.1   | 2.480291 | 2.990663 | 4.256934 | 0.00638  | 0.097762 | -2.0904  |
| lnc-PKLR-6:1      | -1.35915 | 3.785013 | -4.25675 | 0.006381 | 0.097762 | -2.0906  |
| NONHSAT205725.1   | 1.31323  | 6.575941 | 4.256552 | 0.006383 | 0.097762 | -2.09082 |
| NONHSAT182571.1   | 1.237488 | 4.28271  | 4.255993 | 0.006386 | 0.097762 | -2.09144 |
| ENST00000635064.1 | 1.197291 | 5.622103 | 4.254574 | 0.006396 | 0.097835 | -2.093   |
| NONHSAT167737.1   | 1.693609 | 2.299129 | 4.254493 | 0.006396 | 0.097835 | -2.09309 |
| NR_110112         | -1.39941 | 2.294252 | -4.25407 | 0.006399 | 0.097835 | -2.09356 |
| NONHSAT210377.1   | 1.386603 | 2.866236 | 4.253952 | 0.0064   | 0.097835 | -2.09369 |
| MSTRG.41826.1     | -1.11068 | 3.139584 | -4.25222 | 0.006412 | 0.09792  | -2.0956  |
| NONHSAT221803.1   | 1.853446 | 2.105972 | 4.251947 | 0.006413 | 0.09792  | -2.0959  |
| T207405           | 1.841144 | 7.11991  | 4.251489 | 0.006416 | 0.097951 | -2.09641 |
| lnc-CYP24A1-2:1   | 1.172985 | 3.137862 | 4.250968 | 0.00642  | 0.097989 | -2.09698 |
| lnc-TOR1AIP2-2:5  | 1.244527 | 3.367425 | 4.250164 | 0.006425 | 0.098041 | -2.09787 |
| T304770           | 1.255767 | 3.777041 | 4.249339 | 0.006431 | 0.09808  | -2.09878 |
| NONHSAT224320.1   | 1.78967  | 3.8729   | 4.248003 | 0.00644  | 0.098149 | -2.10025 |
| NR_110699         | 2.048155 | 2.935757 | 4.247915 | 0.00644  | 0.098149 | -2.10035 |
| lnc-MUC20-4:3     | 1.577915 | 3.71643  | 4.247648 | 0.006442 | 0.098149 | -2.10065 |
| lnc-EML4-2:1      | 1.141851 | 4.816695 | 4.247465 | 0.006443 | 0.098153 | -2.10085 |
| lnc-DZANK1-3:3    | -1.69041 | 3.955347 | -4.24679 | 0.006448 | 0.098157 | -2.10159 |
| NR_004401         | -1.18529 | 1.883866 | -4.24669 | 0.006448 | 0.098157 | -2.1017  |
| NONHSAT166593.1   | -1.63574 | 2.480052 | -4.24626 | 0.006451 | 0.098186 | -2.10218 |
| NONHSAT185478.1   | -1.68006 | 2.552498 | -4.24603 | 0.006453 | 0.098195 | -2.10244 |
| T245856           | -1.40982 | 2.958502 | -4.24547 | 0.006457 | 0.098208 | -2.10305 |
| NONHSAT199376.1   | 1.629007 | 2.859839 | 4.244456 | 0.006463 | 0.098292 | -2.10417 |
| lnc-ZFP42-4:2     | 1.310485 | 4.888124 | 4.243914 | 0.006467 | 0.098296 | -2.10477 |
| MSTRG.10985.3     | 1.724175 | 2.355252 | 4.243825 | 0.006468 | 0.098296 | -2.10487 |
| NONHSAT194161.1   | 1.012708 | 3.294119 | 4.243531 | 0.00647  | 0.098296 | -2.10519 |
| NONHSAT206432.1   | -1.80266 | 2.40013  | -4.24277 | 0.006475 | 0.098296 | -2.10603 |
| lnc-METAP1-3:9    | -1.32128 | 2.312701 | -4.24197 | 0.00648  | 0.098296 | -2.10692 |
| ENST00000503091.1 | -1.54926 | 2.091654 | -4.24061 | 0.006489 | 0.098296 | -2.10842 |
| ENST00000642235.1 | 1.044325 | 1.794628 | 4.240599 | 0.006489 | 0.098296 | -2.10844 |
| ENST00000665007.1 | -1.45083 | 3.087687 | -4.2404  | 0.006491 | 0.098296 | -2.10865 |
| ENST00000649237.1 | 1.357841 | 10.18434 | 4.239277 | 0.006498 | 0.098371 | -2.1099  |
| lnc-BTNL2-2:1     | -1.34456 | 1.768099 | -4.23885 | 0.006501 | 0.098371 | -2.11037 |

|                   |          |          |          |          |          |          |
|-------------------|----------|----------|----------|----------|----------|----------|
| MSTRG.63841.1     | -1.79958 | 3.873303 | -4.23781 | 0.006508 | 0.098428 | -2.11152 |
| ENST00000647804.1 | 1.919726 | 2.650525 | 4.236367 | 0.006518 | 0.09847  | -2.11312 |
| lnc-TAPT1-4:1     | -1.01201 | 6.882692 | -4.23626 | 0.006519 | 0.09847  | -2.11323 |
| NONHSAT202447.1   | 1.240642 | 3.127506 | 4.236152 | 0.006519 | 0.09847  | -2.11335 |
| NONHSAT151721.1   | 1.207118 | 4.022955 | 4.235289 | 0.006525 | 0.098527 | -2.11431 |
| lnc-TFF3-4:1      | 1.236368 | 5.53348  | 4.234399 | 0.006531 | 0.09854  | -2.11529 |
| NONHSAT157864.1   | 1.794643 | 3.187743 | 4.232327 | 0.006545 | 0.098596 | -2.11758 |
| MSTRG.1842.8      | -1.11182 | 3.048817 | -4.23227 | 0.006546 | 0.098596 | -2.11765 |
| lnc-RNF227-2:1    | -1.19035 | 4.115453 | -4.22937 | 0.006565 | 0.098776 | -2.12086 |
| NONHSAT181882.1   | 1.648307 | 1.981564 | 4.227544 | 0.006578 | 0.098905 | -2.12288 |
| lnc-IQCF3-1:4     | 1.629742 | 2.412033 | 4.225651 | 0.006591 | 0.09893  | -2.12498 |
| MSTRG.12936.12    | 1.415933 | 1.792012 | 4.225576 | 0.006591 | 0.09893  | -2.12506 |
| lnc-AGBL4-3:1     | 1.589513 | 2.329051 | 4.225289 | 0.006593 | 0.09893  | -2.12538 |
| lnc-NAIF1-1:4     | -1.22348 | 1.897425 | -4.22522 | 0.006594 | 0.09893  | -2.12545 |
| lnc-ABT1-6:1      | 1.123935 | 3.498863 | 4.225087 | 0.006595 | 0.09893  | -2.1256  |
| NONHSAT209150.1   | 1.705399 | 2.390146 | 4.225004 | 0.006595 | 0.09893  | -2.12569 |
| ENST00000586894.1 | -1.3277  | 3.057326 | -4.22402 | 0.006602 | 0.098996 | -2.12678 |
| NONHSAT197646.1   | 1.874562 | 3.002015 | 4.223939 | 0.006603 | 0.098996 | -2.12687 |
| NONHSAT150433.1   | 1.107343 | 4.15328  | 4.223196 | 0.006608 | 0.099014 | -2.1277  |
| lnc-COA1-3:1      | -1.63079 | 2.09918  | -4.2228  | 0.00661  | 0.099014 | -2.12814 |
| ENST00000626448.1 | -1.57973 | 2.795345 | -4.22262 | 0.006612 | 0.099014 | -2.12833 |
| NONHSAT214330.1   | 1.201433 | 4.115065 | 4.222623 | 0.006612 | 0.099014 | -2.12833 |
| lnc-ARL6IP6-3:1   | 1.158689 | 1.704881 | 4.222401 | 0.006613 | 0.099022 | -2.12858 |
| lnc-SMCO2-4:1     | -1.00989 | 4.537369 | -4.22202 | 0.006616 | 0.099027 | -2.129   |
| lnc-IRF7-1:1      | 1.273227 | 3.550048 | 4.221174 | 0.006622 | 0.099027 | -2.12994 |
| lnc-CD79B-2:1     | -1.28882 | 4.172942 | -4.22107 | 0.006622 | 0.099027 | -2.13005 |
| NONHSAT175262.1   | 1.664572 | 2.004917 | 4.220606 | 0.006626 | 0.099042 | -2.13057 |
| T126462           | 2.15158  | 2.528526 | 4.220355 | 0.006627 | 0.099042 | -2.13085 |
| MSTRG.6455.1      | 1.949484 | 3.041225 | 4.218554 | 0.00664  | 0.099164 | -2.13285 |
| T006816           | 1.689003 | 1.946341 | 4.218193 | 0.006642 | 0.099177 | -2.13325 |
| lnc-NUBPL-1:5     | 1.932833 | 2.490991 | 4.217258 | 0.006649 | 0.099244 | -2.13428 |
| ENST00000567966.1 | 1.774328 | 1.980317 | 4.215041 | 0.006664 | 0.099361 | -2.13674 |
| NR_104616         | 1.013907 | 3.850304 | 4.214563 | 0.006667 | 0.099361 | -2.13727 |
| NONHSAT165026.1   | 1.401916 | 2.014641 | 4.214206 | 0.00667  | 0.099374 | -2.13767 |
| MSTRG.14798.1     | 1.143738 | 2.210505 | 4.213972 | 0.006671 | 0.099378 | -2.13793 |
| NONHSAT216351.1   | -1.47255 | 3.548411 | -4.21377 | 0.006673 | 0.099384 | -2.13815 |
| ENST00000654007.1 | 1.692117 | 5.202183 | 4.211754 | 0.006687 | 0.09952  | -2.14039 |
| MSTRG.72423.1     | -1.37664 | 3.967114 | -4.21117 | 0.006691 | 0.099566 | -2.14103 |
| NONHSAT154406.1   | 1.762919 | 2.870005 | 4.209344 | 0.006704 | 0.099661 | -2.14307 |
| MSTRG.32700.1     | 1.153126 | 5.035617 | 4.206786 | 0.006722 | 0.099794 | -2.14591 |
| MSTRG.45516.5     | 1.598368 | 2.475284 | 4.204464 | 0.006738 | 0.099883 | -2.14849 |
| lnc-GLT1D1-4:2    | 1.139691 | 3.513408 | 4.204159 | 0.00674  | 0.099883 | -2.14883 |
| ENST00000527321.1 | 1.363221 | 7.528103 | 4.202915 | 0.006749 | 0.099926 | -2.15021 |
| lnc-VCAN-4:1      | -1.11472 | 4.73551  | -4.20261 | 0.006751 | 0.099942 | -2.15055 |
| MSTRG.65635.3     | -1.27771 | 3.815506 | -4.20181 | 0.006757 | 0.099961 | -2.15144 |
| NR_109894         | 1.185784 | 3.731699 | 4.201531 | 0.006759 | 0.099961 | -2.15175 |
| lnc-GRSF1-1:1     | -1.10713 | 3.399566 | -4.20138 | 0.00676  | 0.099961 | -2.15191 |
| MSTRG.71413.1     | -1.58437 | 3.073818 | -4.20112 | 0.006762 | 0.099961 | -2.15221 |

|                   |          |          |          |          |          |          |
|-------------------|----------|----------|----------|----------|----------|----------|
| NONHSAT215465.1   | -1.07021 | 3.523042 | -4.20091 | 0.006763 | 0.099961 | -2.15244 |
| lnc-ADAM22-7:1    | 1.417909 | 4.506566 | 4.200552 | 0.006766 | 0.099961 | -2.15284 |
| NONHSAT170849.1   | -1.34324 | 4.715802 | -4.20055 | 0.006766 | 0.099961 | -2.15284 |
| lnc-PLA2G4A-7:5   | 1.246481 | 4.138346 | 4.200473 | 0.006766 | 0.099961 | -2.15292 |
| MSTRG.32945.20    | 1.326712 | 1.704957 | 4.199517 | 0.006773 | 0.099995 | -2.15399 |
| MSTRG.50863.1     | 2.068593 | 5.04873  | 4.198594 | 0.006779 | 0.100025 | -2.15501 |
| lnc-PLCL2-11:1    | 1.808995 | 2.382069 | 4.198233 | 0.006782 | 0.100048 | -2.15542 |
| lnc-NUDT15-4:1    | 1.503219 | 4.510082 | 4.197754 | 0.006785 | 0.100051 | -2.15595 |
| NONHSAT154631.1   | 1.194226 | 5.894698 | 4.196481 | 0.006794 | 0.100114 | -2.15737 |
| lnc-CRX-5:2       | 1.142864 | 4.300648 | 4.196402 | 0.006795 | 0.100114 | -2.15745 |
| MSTRG.67292.1     | -1.63662 | 2.081064 | -4.19615 | 0.006797 | 0.10012  | -2.15774 |
| T190328           | 1.035463 | 5.176546 | 4.19568  | 0.0068   | 0.100154 | -2.15826 |
| ENST00000591038.1 | 1.687846 | 3.146673 | 4.195127 | 0.006804 | 0.10018  | -2.15887 |
| NONHSAT219302.1   | 1.494123 | 3.108328 | 4.194836 | 0.006806 | 0.10018  | -2.1592  |
| MSTRG.65885.2     | 1.930105 | 3.074519 | 4.194554 | 0.006808 | 0.10018  | -2.15951 |
| NONHSAT148328.1   | 1.66884  | 1.935619 | 4.194382 | 0.006809 | 0.10018  | -2.1597  |
| lnc-SLC10A5-1:2   | -1.07346 | 4.780397 | -4.19409 | 0.006811 | 0.10018  | -2.16003 |
| lnc-CCDC74A-7:3   | -1.06145 | 3.876998 | -4.19403 | 0.006812 | 0.10018  | -2.16009 |
| lnc-C12orf75-5:1  | -1.03914 | 10.0937  | -4.19298 | 0.006819 | 0.100215 | -2.16126 |
| NONHSAT190483.1   | -1.07163 | 2.023085 | -4.19283 | 0.00682  | 0.100215 | -2.16143 |
| lnc-GUCD1-1:1     | -1.10819 | 5.720091 | -4.19217 | 0.006825 | 0.100259 | -2.16216 |
| lnc-RRM1-6:1      | -1.38871 | 4.135037 | -4.192   | 0.006826 | 0.100261 | -2.16235 |
| lnc-WASHC4-3:2    | 1.67656  | 2.280272 | 4.190428 | 0.006837 | 0.100328 | -2.1641  |
| ENST00000420020.5 | -1.38278 | 2.387701 | -4.19018 | 0.006839 | 0.100328 | -2.16438 |
| lnc-ZNF107-6:1    | -1.00367 | 2.944112 | -4.19011 | 0.00684  | 0.100328 | -2.16446 |
| lnc-GTF2B-7:1     | -1.94009 | 2.949412 | -4.18942 | 0.006845 | 0.100328 | -2.16522 |
| NONHSAT190073.1   | -1.86014 | 2.905471 | -4.18806 | 0.006854 | 0.100347 | -2.16674 |
| MSTRG.15295.1     | 1.261449 | 2.124962 | 4.186706 | 0.006864 | 0.100347 | -2.16825 |
| MSTRG.21468.3     | 1.196472 | 2.584165 | 4.186068 | 0.006869 | 0.100347 | -2.16896 |
| NONHSAT168514.1   | 1.371858 | 2.151215 | 4.186008 | 0.006869 | 0.100347 | -2.16903 |
| NONHSAT184635.1   | -1.18796 | 2.086208 | -4.18599 | 0.006869 | 0.100347 | -2.16905 |
| NONHSAT205263.1   | 1.045726 | 3.36084  | 4.18572  | 0.006871 | 0.100347 | -2.16935 |
| NONHSAT197652.1   | 1.368533 | 2.100321 | 4.185498 | 0.006873 | 0.100347 | -2.1696  |
| NONHSAT170181.1   | -1.38455 | 2.363483 | -4.18472 | 0.006878 | 0.100399 | -2.17046 |
| ENST00000419362.1 | 1.334567 | 1.719016 | 4.183582 | 0.006887 | 0.100446 | -2.17173 |
| NR_110877         | 1.630404 | 2.134151 | 4.183244 | 0.006889 | 0.100467 | -2.17211 |
| lnc-MAP10-1:1     | 2.110359 | 2.971515 | 4.181415 | 0.006902 | 0.100572 | -2.17415 |
| NONHSAT214547.1   | 1.50281  | 3.378078 | 4.180836 | 0.006906 | 0.100575 | -2.17479 |
| lnc-ZFHX4-5:1     | -2.07263 | 3.364782 | -4.18064 | 0.006908 | 0.100582 | -2.17502 |
| lnc-CDY1B-13:1    | -1.1505  | 4.717581 | -4.17947 | 0.006916 | 0.100647 | -2.17632 |
| MSTRG.67720.1     | -1.13935 | 4.167229 | -4.17833 | 0.006925 | 0.100694 | -2.17759 |
| lnc-PSG2-5:2      | 1.257933 | 4.928158 | 4.177499 | 0.006931 | 0.10072  | -2.17852 |
| NONHSAT201637.1   | -1.11457 | 1.795648 | -4.17657 | 0.006937 | 0.10072  | -2.17955 |
| NONHSAT221731.1   | 1.245748 | 1.720965 | 4.176272 | 0.00694  | 0.100723 | -2.17988 |
| NONHSAT201154.1   | 1.94903  | 4.044475 | 4.173215 | 0.006962 | 0.100944 | -2.1833  |
| lnc-PTGS2-3:1     | -1.29279 | 3.066595 | -4.17189 | 0.006971 | 0.100967 | -2.18477 |
| lnc-TNFAIP3-5:5   | 1.174699 | 1.997115 | 4.170433 | 0.006982 | 0.10105  | -2.1864  |
| NONHSAT161440.1   | 1.896814 | 3.022158 | 4.169824 | 0.006987 | 0.101071 | -2.18708 |

|                   |          |          |          |          |          |          |
|-------------------|----------|----------|----------|----------|----------|----------|
| lnc-TRAF5-6:12    | -1.35359 | 2.277517 | -4.16939 | 0.00699  | 0.101102 | -2.18757 |
| ENST00000515871.1 | -1.47919 | 4.931503 | -4.16765 | 0.007003 | 0.1012   | -2.18952 |
| NONHSAT150546.1   | -2.34145 | 2.273873 | -4.16722 | 0.007006 | 0.101213 | -2.19    |
| NONHSAT207168.1   | 1.364486 | 6.94055  | 4.167117 | 0.007006 | 0.101213 | -2.19011 |
| NONHSAT190127.1   | 1.580827 | 3.40076  | 4.165482 | 0.007018 | 0.10128  | -2.19194 |
| ENST00000662406.1 | -1.0594  | 2.988558 | -4.16487 | 0.007023 | 0.10128  | -2.19262 |
| MSTRG.53962.1     | 1.295213 | 2.131147 | 4.164818 | 0.007023 | 0.10128  | -2.19268 |
| MSTRG.52949.1     | 1.126248 | 1.997477 | 4.164726 | 0.007024 | 0.10128  | -2.19278 |
| ENST00000577423.2 | 1.098658 | 4.807445 | 4.164415 | 0.007026 | 0.10128  | -2.19313 |
| NONHSAT167758.1   | 1.838071 | 2.452317 | 4.164377 | 0.007027 | 0.10128  | -2.19317 |
| lnc-NRDE2-6:1     | -1.22732 | 3.634235 | -4.1643  | 0.007027 | 0.10128  | -2.19325 |
| NONHSAT197032.1   | 1.018648 | 1.594534 | 4.162975 | 0.007037 | 0.10135  | -2.19474 |
| NONHSAT174917.1   | 1.692285 | 2.917414 | 4.162588 | 0.00704  | 0.101376 | -2.19517 |
| lnc-ENDOD1-6:1    | -1.7443  | 2.633154 | -4.16062 | 0.007054 | 0.101484 | -2.19737 |
| T331246           | -1.35422 | 3.271998 | -4.15984 | 0.00706  | 0.101512 | -2.19825 |
| ENST00000658639.1 | -1.81188 | 3.424945 | -4.15966 | 0.007061 | 0.101512 | -2.19844 |
| lnc-GARS-8:1      | -1.02152 | 1.790215 | -4.15915 | 0.007065 | 0.101539 | -2.19901 |
| T306301           | 1.742299 | 2.438104 | 4.158115 | 0.007073 | 0.101628 | -2.20018 |
| lnc-SLC15A4-16:1  | -1.72355 | 2.669418 | -4.15733 | 0.007079 | 0.101628 | -2.20106 |
| ENST00000422600.1 | 1.401117 | 3.281473 | 4.156203 | 0.007087 | 0.101633 | -2.20232 |
| NONHSAT221833.1   | 1.008472 | 2.79045  | 4.153956 | 0.007104 | 0.1017   | -2.20483 |
| lnc-CBLN4-1:1     | 1.661136 | 2.378745 | 4.153175 | 0.00711  | 0.1017   | -2.2057  |
| NONHSAT196346.1   | 1.432968 | 1.916322 | 4.150929 | 0.007127 | 0.101738 | -2.20822 |
| lnc-COG2-1:1      | 1.372226 | 7.191168 | 4.150073 | 0.007133 | 0.101738 | -2.20918 |
| NONHSAT159704.1   | 1.658263 | 2.497875 | 4.149997 | 0.007134 | 0.101738 | -2.20926 |
| lnc-RDH13-2:9     | 1.358319 | 1.883767 | 4.149432 | 0.007138 | 0.101738 | -2.2099  |
| NONHSAT170145.1   | 1.346154 | 2.256258 | 4.14926  | 0.007139 | 0.101738 | -2.21009 |
| lnc-TMEM53-1:1    | 1.486754 | 3.11701  | 4.148978 | 0.007141 | 0.101738 | -2.21041 |
| NONHSAT190552.1   | -1.3146  | 6.916679 | -4.14891 | 0.007142 | 0.101738 | -2.21048 |
| NONHSAT150508.1   | 1.217832 | 4.955073 | 4.148308 | 0.007146 | 0.101742 | -2.21116 |
| MSTRG.7688.1      | 1.11328  | 1.985406 | 4.14826  | 0.007147 | 0.101742 | -2.21121 |
| ENST00000431813.1 | -1.1497  | 6.023166 | -4.14815 | 0.007147 | 0.101742 | -2.21133 |
| ENST00000665399.1 | 1.246438 | 8.340314 | 4.148018 | 0.007148 | 0.101742 | -2.21148 |
| NONHSAT179102.1   | 1.615437 | 4.758785 | 4.146798 | 0.007158 | 0.101772 | -2.21285 |
| NONHSAT190001.1   | 1.493296 | 4.022432 | 4.146456 | 0.00716  | 0.101772 | -2.21323 |
| NONHSAT179007.1   | 1.830438 | 2.437714 | 4.145923 | 0.007164 | 0.1018   | -2.21383 |
| MSTRG.19304.1     | 1.400023 | 5.007449 | 4.144653 | 0.007174 | 0.10189  | -2.21525 |
| lnc-ZNF615-1:1    | -1.17887 | 3.296997 | -4.14316 | 0.007185 | 0.101981 | -2.21693 |
| NONHSAT220502.1   | 1.121649 | 4.231964 | 4.142672 | 0.007189 | 0.102005 | -2.21747 |
| lnc-LEFTY1-5:1    | 1.019418 | 5.093585 | 4.142048 | 0.007193 | 0.102044 | -2.21817 |
| NONHSAT203634.1   | 1.574296 | 2.199485 | 4.140865 | 0.007202 | 0.102128 | -2.2195  |
| NONHSAT159422.1   | 1.149757 | 4.443456 | 4.139792 | 0.007211 | 0.102167 | -2.2207  |
| NONHSAT170742.1   | 1.104244 | 2.029254 | 4.139412 | 0.007213 | 0.102167 | -2.22113 |
| T300637           | -1.64951 | 2.326817 | -4.13935 | 0.007214 | 0.102167 | -2.22121 |
| lnc-DDX58-3:1     | -1.73898 | 2.848203 | -4.13842 | 0.007221 | 0.102204 | -2.22225 |
| NONHSAT165822.1   | -1.40036 | 3.486608 | -4.13818 | 0.007223 | 0.102216 | -2.22252 |
| lnc-IL37-5:1      | -1.45896 | 2.313765 | -4.135   | 0.007247 | 0.102412 | -2.22608 |
| NONHSAT215556.1   | 1.15758  | 1.873618 | 4.134343 | 0.007252 | 0.102457 | -2.22682 |

|                   |          |          |          |          |          |          |
|-------------------|----------|----------|----------|----------|----------|----------|
| NONHSAT218355.1   | 1.124528 | 1.647297 | 4.133584 | 0.007258 | 0.102502 | -2.22767 |
| lnc-EVX2-4:2      | 1.141501 | 3.626122 | 4.133291 | 0.00726  | 0.102502 | -2.228   |
| NONHSAT165146.1   | 2.067045 | 2.670648 | 4.132319 | 0.007268 | 0.102541 | -2.22909 |
| NONHSAT222021.1   | -1.16397 | 1.706072 | -4.1317  | 0.007272 | 0.102541 | -2.22979 |
| lnc-AGR3-6:1      | 1.766083 | 4.242558 | 4.131544 | 0.007274 | 0.102541 | -2.22996 |
| NONHSAT158555.1   | 1.088338 | 2.695626 | 4.13104  | 0.007277 | 0.102543 | -2.23053 |
| ENST00000507849.1 | -1.1585  | 1.684741 | -4.13094 | 0.007278 | 0.102543 | -2.23064 |
| lnc-MAP3K7-4:1    | -1.25933 | 1.98235  | -4.13059 | 0.007281 | 0.102543 | -2.23103 |
| ENST00000612806.1 | -1.13232 | 7.148681 | -4.12992 | 0.007286 | 0.102543 | -2.23179 |
| MSTRG.43268.10    | 2.339256 | 2.283973 | 4.129611 | 0.007288 | 0.102543 | -2.23214 |
| NONHSAT205340.1   | 1.81647  | 2.468334 | 4.128922 | 0.007294 | 0.102556 | -2.23291 |
| NONHSAT214589.1   | 1.709652 | 2.866782 | 4.128295 | 0.007298 | 0.102587 | -2.23361 |
| NONHSAT221914.1   | -1.56137 | 1.875955 | -4.12707 | 0.007308 | 0.102685 | -2.23499 |
| lnc-RRM2-2:1      | -1.27734 | 4.27811  | -4.12632 | 0.007314 | 0.10271  | -2.23583 |
| MSTRG.29347.1     | 1.120099 | 4.750836 | 4.126095 | 0.007315 | 0.10271  | -2.23609 |
| lnc-ZC3H12A-1:1   | -1.11029 | 4.32188  | -4.12588 | 0.007317 | 0.10271  | -2.23633 |
| MSTRG.61994.1     | 1.251995 | 8.242467 | 4.12585  | 0.007317 | 0.10271  | -2.23636 |
| lnc-BLOC1S6-2:1   | 1.153207 | 3.717176 | 4.124646 | 0.007327 | 0.102774 | -2.23772 |
| NONHSAT153152.1   | 1.780417 | 1.925401 | 4.124396 | 0.007329 | 0.102774 | -2.238   |
| lnc-SON-2:1       | -1.00467 | 5.518391 | -4.12278 | 0.007341 | 0.102888 | -2.23982 |
| NONHSAT174957.1   | -1.0055  | 1.751461 | -4.12182 | 0.007349 | 0.10291  | -2.24089 |
| lnc-HMBOX1-9:1    | -1.4558  | 2.949947 | -4.1217  | 0.007349 | 0.10291  | -2.24103 |
| NONHSAT158034.1   | 1.917979 | 2.200226 | 4.121417 | 0.007352 | 0.102923 | -2.24135 |
| MSTRG.45502.1     | -1.40858 | 2.115175 | -4.12066 | 0.007358 | 0.102954 | -2.2422  |
| MSTRG.48238.14    | 1.349865 | 1.799152 | 4.119781 | 0.007364 | 0.102955 | -2.24319 |
| lnc-RASGRP3-15:1  | -1.12046 | 4.992229 | -4.11802 | 0.007378 | 0.103027 | -2.24517 |
| MSTRG.8962.1      | 1.011342 | 3.921874 | 4.117965 | 0.007379 | 0.103027 | -2.24523 |
| ENST00000431656.1 | -1.60826 | 2.59623  | -4.11784 | 0.007379 | 0.103027 | -2.24537 |
| NONHSAT218026.1   | 2.457516 | 3.588595 | 4.117532 | 0.007382 | 0.103035 | -2.24572 |
| lnc-UPRT-4:1      | 1.196107 | 3.527766 | 4.116909 | 0.007387 | 0.103043 | -2.24642 |
| lnc-EXTL3-7:1     | -1.06095 | 2.012153 | -4.11677 | 0.007388 | 0.103043 | -2.24657 |
| ENST00000656456.1 | 1.034301 | 1.581741 | 4.11667  | 0.007389 | 0.103043 | -2.24669 |
| MSTRG.58001.1     | -1.53883 | 3.351692 | -4.11629 | 0.007392 | 0.103045 | -2.24712 |
| ENST00000654316.1 | 1.364082 | 2.65525  | 4.116067 | 0.007393 | 0.103051 | -2.24737 |
| NONHSAT199256.1   | 2.285086 | 3.338998 | 4.115931 | 0.007394 | 0.103051 | -2.24752 |
| NONHSAT203228.1   | 1.127108 | 1.629488 | 4.114432 | 0.007406 | 0.103152 | -2.24921 |
| NONHSAT215990.1   | -1.04177 | 5.068392 | -4.1142  | 0.007408 | 0.103152 | -2.24947 |
| LINC02539:10      | 1.686217 | 4.140709 | 4.114096 | 0.007409 | 0.103152 | -2.24959 |
| lnc-UPRT-6:7      | -1.23761 | 2.826584 | -4.11355 | 0.007413 | 0.103162 | -2.25021 |
| lnc-MMACHC-1:1    | -1.26908 | 4.016644 | -4.11298 | 0.007417 | 0.103189 | -2.25085 |
| NONHSAT160725.1   | -1.08774 | 4.977158 | -4.11264 | 0.00742  | 0.103208 | -2.25123 |
| lnc-SRI-1:1       | 1.167534 | 2.255699 | 4.112422 | 0.007422 | 0.103208 | -2.25147 |
| lnc-COPS2-5:1     | -1.03764 | 9.177026 | -4.11195 | 0.007426 | 0.103215 | -2.252   |
| MSTRG.40830.22    | 1.398778 | 2.446701 | 4.11141  | 0.00743  | 0.103248 | -2.25261 |
| T171330           | 1.160376 | 1.689568 | 4.110738 | 0.007435 | 0.103248 | -2.25337 |
| NONHSAT155526.1   | 1.17531  | 4.387176 | 4.110053 | 0.00744  | 0.10328  | -2.25414 |
| lnc-BAG3-3:1      | 1.298032 | 4.560151 | 4.109692 | 0.007443 | 0.10329  | -2.25455 |
| lnc-MED10-11:3    | 1.047635 | 3.573509 | 4.108931 | 0.007449 | 0.103316 | -2.25541 |

|                   |          |          |          |          |          |          |
|-------------------|----------|----------|----------|----------|----------|----------|
| ENST00000502049.3 | -1.30709 | 3.444184 | -4.10763 | 0.00746  | 0.103352 | -2.25688 |
| lnc-MRPL44-1:3    | 1.430014 | 1.842961 | 4.107259 | 0.007462 | 0.103352 | -2.25729 |
| lnc-POU6F2-3:1    | 1.867607 | 2.801611 | 4.107228 | 0.007463 | 0.103352 | -2.25733 |
| NONHSAT222287.1   | -1.44353 | 2.13972  | -4.10683 | 0.007466 | 0.103352 | -2.25777 |
| ENST00000602328.1 | -1.7483  | 3.844334 | -4.1068  | 0.007466 | 0.103352 | -2.25781 |
| lnc-TMEM135-10:1  | 1.739494 | 2.774743 | 4.106274 | 0.00747  | 0.103369 | -2.2584  |
| ENST00000415549.2 | 1.411948 | 2.546603 | 4.10616  | 0.007471 | 0.103369 | -2.25853 |
| NONHSAT154470.1   | 1.093295 | 1.922803 | 4.105706 | 0.007475 | 0.103392 | -2.25904 |
| ENST00000564251.1 | 1.161565 | 1.935157 | 4.105309 | 0.007478 | 0.103401 | -2.25949 |
| NONHSAT216339.1   | 1.747551 | 2.408289 | 4.105019 | 0.00748  | 0.103419 | -2.25982 |
| lnc-AGAP2-1:4     | 1.727554 | 4.04695  | 4.104098 | 0.007487 | 0.103462 | -2.26085 |
| ENST00000662737.1 | 1.577581 | 4.259934 | 4.103849 | 0.007489 | 0.103462 | -2.26114 |
| NONHSAT154487.1   | 1.236692 | 1.675813 | 4.10289  | 0.007497 | 0.103508 | -2.26222 |
| NONHSAT207325.1   | 1.400923 | 6.617803 | 4.102476 | 0.0075   | 0.103513 | -2.26268 |
| ENST00000558375.1 | -1.24572 | 2.093105 | -4.10199 | 0.007504 | 0.10354  | -2.26324 |
| NONHSAT203438.1   | 2.572468 | 3.036957 | 4.101971 | 0.007504 | 0.10354  | -2.26325 |
| lnc-RAB39A-2:1    | -1.76318 | 4.640076 | -4.10116 | 0.007511 | 0.103567 | -2.26417 |
| ENST00000649077.1 | 1.232377 | 1.944571 | 4.100729 | 0.007514 | 0.103567 | -2.26466 |
| NONHSAT180828.1   | 1.228518 | 5.347415 | 4.100698 | 0.007514 | 0.103567 | -2.26469 |
| NONHSAT193654.1   | 1.075178 | 7.612436 | 4.100126 | 0.007519 | 0.103587 | -2.26534 |
| NONHSAT218312.1   | 1.378117 | 8.690041 | 4.099921 | 0.007521 | 0.103595 | -2.26557 |
| NONHSAT190399.1   | 1.198349 | 4.322326 | 4.099497 | 0.007524 | 0.103597 | -2.26605 |
| MSTRG.41786.1     | 1.196747 | 4.969414 | 4.099179 | 0.007527 | 0.103597 | -2.26641 |
| NONHSAT211841.1   | -1.2632  | 4.064023 | -4.09906 | 0.007528 | 0.103597 | -2.26654 |
| NONHSAT221602.1   | 1.603796 | 1.851176 | 4.099057 | 0.007528 | 0.103597 | -2.26654 |
| lnc-ANXA1-4:2     | 2.403472 | 2.897963 | 4.098172 | 0.007535 | 0.10366  | -2.26754 |
| ENST00000451066.1 | -1.10683 | 4.292213 | -4.09739 | 0.007541 | 0.103668 | -2.26843 |
| lnc-PRDM1-7:1     | 1.87406  | 2.566791 | 4.097195 | 0.007542 | 0.103668 | -2.26864 |
| lnc-CYP2C8-3:1    | 1.644194 | 2.582773 | 4.096451 | 0.007548 | 0.103683 | -2.26948 |
| lnc-RPS19BP1-3:1  | 1.807195 | 1.968856 | 4.095475 | 0.007556 | 0.10373  | -2.27059 |
| ENST00000562873.1 | 1.008989 | 2.153632 | 4.0952   | 0.007558 | 0.103746 | -2.2709  |
| LINC00689:9       | 1.510194 | 2.049174 | 4.093877 | 0.007569 | 0.103821 | -2.27239 |
| ENST00000649143.1 | 1.120004 | 1.604546 | 4.091314 | 0.00759  | 0.104008 | -2.27529 |
| lnc-NKX3-2-3:1    | -1.4235  | 3.36481  | -4.09004 | 0.0076   | 0.104102 | -2.27672 |
| NR_125983         | -1.52645 | 1.879566 | -4.08915 | 0.007607 | 0.104144 | -2.27773 |
| lnc-C6orf48-1:1   | 1.264442 | 3.186177 | 4.088931 | 0.007609 | 0.104154 | -2.27798 |
| MSTRG.68491.5     | 1.099567 | 1.888365 | 4.088768 | 0.00761  | 0.104158 | -2.27816 |
| NONHSAT165056.1   | 1.137545 | 5.378434 | 4.088598 | 0.007611 | 0.104163 | -2.27836 |
| NONHSAT167889.1   | 1.000836 | 6.140853 | 4.088044 | 0.007616 | 0.104171 | -2.27898 |
| ENST00000662638.1 | -1.68199 | 2.445077 | -4.0878  | 0.007618 | 0.104171 | -2.27926 |
| ENST00000444488.1 | -1.29114 | 4.724578 | -4.08753 | 0.00762  | 0.104171 | -2.27957 |
| lnc-FAM241B-4:1   | 1.077007 | 1.635683 | 4.087021 | 0.007624 | 0.104171 | -2.28014 |
| MSTRG.22407.1     | 1.687512 | 2.57019  | 4.086732 | 0.007627 | 0.104172 | -2.28047 |
| lnc-SAXO1-1:1     | -1.51794 | 4.141254 | -4.08657 | 0.007628 | 0.104175 | -2.28065 |
| lnc-C11orf95-1:3  | -1.24431 | 1.869033 | -4.08594 | 0.007633 | 0.104216 | -2.28136 |
| ENST00000440492.1 | -1.67222 | 5.268169 | -4.08567 | 0.007635 | 0.104232 | -2.28166 |
| NONHSAT204519.1   | 1.651    | 3.952809 | 4.085213 | 0.007639 | 0.104248 | -2.28218 |
| lnc-WDR72-1:4     | 1.103173 | 1.636407 | 4.085147 | 0.007639 | 0.104248 | -2.28226 |

|                   |          |          |          |          |          |          |
|-------------------|----------|----------|----------|----------|----------|----------|
| ENST00000669546.1 | -1.02338 | 4.029273 | -4.08473 | 0.007643 | 0.10425  | -2.28272 |
| NONHSAT179548.1   | -1.35685 | 1.900926 | -4.08468 | 0.007643 | 0.10425  | -2.28278 |
| NONHSAT172593.1   | -1.18767 | 2.106568 | -4.08461 | 0.007644 | 0.10425  | -2.28286 |
| NONHSAT195522.1   | -1.26163 | 1.722626 | -4.08422 | 0.007647 | 0.10428  | -2.28331 |
| NONHSAT186573.1   | 2.025859 | 3.165169 | 4.083045 | 0.007656 | 0.104311 | -2.28463 |
| NR_036512         | 1.019383 | 10.40677 | 4.082732 | 0.007659 | 0.104325 | -2.28499 |
| NONHSAT215093.1   | 1.326812 | 1.721065 | 4.081806 | 0.007667 | 0.104364 | -2.28604 |
| lnc-ZNF708-14:3   | 1.008641 | 4.028402 | 4.080651 | 0.007676 | 0.104421 | -2.28734 |
| MSTRG.14640.1     | 1.097588 | 5.890503 | 4.079668 | 0.007684 | 0.104439 | -2.28846 |
| MSTRG.10705.1     | 1.704459 | 2.862459 | 4.07961  | 0.007684 | 0.104439 | -2.28852 |
| lnc-ANKRA2-10:1   | -1.08567 | 3.729491 | -4.07872 | 0.007692 | 0.104453 | -2.28953 |
| NONHSAT192694.1   | 1.225319 | 4.68919  | 4.078274 | 0.007695 | 0.10446  | -2.29003 |
| lnc-MCL1-5:2      | -1.14334 | 3.283936 | -4.0771  | 0.007705 | 0.104507 | -2.29137 |
| lnc-FYB1-1:2      | -1.26964 | 2.357686 | -4.077   | 0.007706 | 0.104507 | -2.29147 |
| ENST00000428920.2 | 1.445688 | 5.20598  | 4.076948 | 0.007706 | 0.104507 | -2.29154 |
| MSTRG.1129.1      | -1.44119 | 2.357391 | -4.07683 | 0.007707 | 0.104507 | -2.29166 |
| lnc-SH3TC2-3:1    | -1.16563 | 2.146128 | -4.07671 | 0.007708 | 0.104507 | -2.2918  |
| lnc-BRD7-4:1      | -1.0197  | 4.27742  | -4.07639 | 0.007711 | 0.104515 | -2.29217 |
| NONHSAT178397.1   | -1.46905 | 3.154359 | -4.07619 | 0.007712 | 0.104522 | -2.29239 |
| lnc-REG1B-9:1     | 1.970323 | 2.997538 | 4.074889 | 0.007723 | 0.104576 | -2.29387 |
| ENST00000425983.1 | 1.312179 | 10.615   | 4.073762 | 0.007732 | 0.104622 | -2.29514 |
| NONHSAT173144.1   | 1.090891 | 5.353925 | 4.07303  | 0.007738 | 0.104663 | -2.29597 |
| NONHSAT197536.1   | -1.08717 | 4.097366 | -4.07216 | 0.007746 | 0.104704 | -2.29696 |
| lnc-KHNYN-5:3     | -1.54995 | 2.659125 | -4.07171 | 0.007749 | 0.104718 | -2.29746 |
| lnc-SYTL3-150:2   | 1.207552 | 8.739974 | 4.071651 | 0.00775  | 0.104718 | -2.29753 |
| MSTRG.33258.20    | -1.02562 | 5.181279 | -4.07059 | 0.007758 | 0.104795 | -2.29874 |
| MSTRG.62109.1     | 1.27115  | 2.548174 | 4.070331 | 0.007761 | 0.104797 | -2.29903 |
| NONHSAT164334.1   | -1.18452 | 3.12557  | -4.07032 | 0.007761 | 0.104797 | -2.29905 |
| NONHSAT170323.1   | 1.146978 | 2.847974 | 4.070026 | 0.007763 | 0.104811 | -2.29938 |
| NONHSAT208086.1   | 1.105818 | 1.652085 | 4.067433 | 0.007785 | 0.104997 | -2.30231 |
| lnc-TEX10-1:1     | 2.047031 | 3.786288 | 4.067393 | 0.007785 | 0.104997 | -2.30236 |
| NONHSAT193293.1   | 1.189969 | 2.596696 | 4.066973 | 0.007788 | 0.105013 | -2.30284 |
| lnc-ZNF652-2:1    | -1.43659 | 3.224861 | -4.06687 | 0.007789 | 0.105013 | -2.30296 |
| NONHSAT168663.1   | 1.399748 | 1.891687 | 4.066311 | 0.007794 | 0.105047 | -2.30359 |
| NONHSAT202399.1   | -1.16976 | 1.757545 | -4.06593 | 0.007797 | 0.10507  | -2.30402 |
| ENST00000485218.1 | 1.785478 | 4.51391  | 4.065515 | 0.0078   | 0.10507  | -2.30449 |
| lnc-CHPF2-4:1     | -1.80618 | 2.16129  | -4.06527 | 0.007802 | 0.10507  | -2.30477 |
| NONHSAT190142.1   | 1.297103 | 3.916063 | 4.064952 | 0.007805 | 0.10507  | -2.30513 |
| lnc-EIF1AY-4:1    | -1.10972 | 5.033056 | -4.06491 | 0.007805 | 0.10507  | -2.30518 |
| lnc-MCM10-1:2     | 1.580321 | 4.723004 | 4.06453  | 0.007809 | 0.10507  | -2.30561 |
| MSTRG.28913.1     | -1.42136 | 3.349498 | -4.06409 | 0.007812 | 0.105099 | -2.3061  |
| NONHSAT205051.1   | 1.25955  | 3.696364 | 4.062606 | 0.007825 | 0.105165 | -2.30779 |
| NONHSAT215103.1   | 1.57258  | 7.470845 | 4.062492 | 0.007826 | 0.105165 | -2.30792 |
| NONHSAT178897.1   | 1.281046 | 3.352781 | 4.061997 | 0.00783  | 0.105165 | -2.30848 |
| NONHSAT164794.1   | 1.364751 | 2.341592 | 4.060382 | 0.007843 | 0.105234 | -2.31031 |
| lnc-KAT7-2:4      | -1.4452  | 2.702544 | -4.06017 | 0.007845 | 0.105234 | -2.31056 |
| MSTRG.46430.6     | 1.871249 | 2.797567 | 4.057467 | 0.007868 | 0.105258 | -2.31362 |
| NONHSAT170464.1   | 1.974531 | 2.344986 | 4.057423 | 0.007868 | 0.105258 | -2.31367 |



|                   |          |          |          |          |          |          |
|-------------------|----------|----------|----------|----------|----------|----------|
| MSTRG.33927.1     | -1.29123 | 5.152142 | -4.05721 | 0.00787  | 0.105265 | -2.31391 |
| ENST00000518217.1 | 1.788086 | 1.957686 | 4.056853 | 0.007873 | 0.105265 | -2.31432 |
| ENST00000661711.1 | 1.208531 | 3.239862 | 4.056617 | 0.007875 | 0.105265 | -2.31459 |
| lnc-ZMAT3-8:1     | -1.27702 | 4.073866 | -4.05615 | 0.007879 | 0.105268 | -2.31512 |
| lnc-ABHD17B-6:1   | -1.16309 | 4.746718 | -4.05498 | 0.007888 | 0.105268 | -2.31644 |
| ENST00000641271.1 | 1.266994 | 4.584805 | 4.054763 | 0.00789  | 0.105268 | -2.31669 |
| NONHSAT172103.1   | 1.759725 | 1.900449 | 4.054744 | 0.00789  | 0.105268 | -2.31671 |
| LINC01052:1       | 1.15556  | 1.996115 | 4.054553 | 0.007892 | 0.105268 | -2.31693 |
| MSTRG.49961.1     | -1.25277 | 4.064669 | -4.05386 | 0.007898 | 0.105268 | -2.31771 |
| lnc-SGK1-9:1      | 1.088219 | 4.18667  | 4.053718 | 0.007899 | 0.105268 | -2.31788 |
| lnc-RASA1-2:5     | 1.463444 | 2.721521 | 4.053647 | 0.0079   | 0.105268 | -2.31796 |
| NONHSAT201986.1   | 1.486163 | 3.183857 | 4.051281 | 0.00792  | 0.105418 | -2.32065 |
| lnc-PSMG4-17:1    | 1.501184 | 2.332699 | 4.050911 | 0.007923 | 0.105432 | -2.32107 |
| NONHSAT184695.1   | -1.14277 | 1.671806 | -4.0498  | 0.007932 | 0.105452 | -2.32234 |
| NONHSAT210396.1   | 1.281277 | 4.396561 | 4.048616 | 0.007942 | 0.105526 | -2.32368 |
| NONHSAT155110.1   | 1.43659  | 1.820912 | 4.048236 | 0.007945 | 0.105526 | -2.32411 |
| ENST00000660474.1 | -1.03167 | 5.728888 | -4.04822 | 0.007945 | 0.105526 | -2.32413 |
| NONHSAT193771.1   | 1.719087 | 2.930739 | 4.047532 | 0.007951 | 0.105551 | -2.32491 |
| ENST00000641463.1 | -1.74727 | 2.588335 | -4.04728 | 0.007954 | 0.105563 | -2.3252  |
| NONHSAT211948.1   | 1.275835 | 3.915598 | 4.047032 | 0.007956 | 0.105569 | -2.32548 |
| lnc-VIRMA-3:1     | -2.05277 | 2.778637 | -4.04687 | 0.007957 | 0.105569 | -2.32566 |
| MSTRG.56755.1     | 1.399589 | 1.785357 | 4.046401 | 0.007961 | 0.105574 | -2.3262  |
| ENST00000660617.1 | 1.228776 | 4.034593 | 4.046168 | 0.007963 | 0.105576 | -2.32646 |
| NONHSAT222639.1   | -1.2699  | 2.657392 | -4.04464 | 0.007976 | 0.105711 | -2.32819 |
| MSTRG.31588.7     | 1.706544 | 2.806508 | 4.043576 | 0.007985 | 0.105722 | -2.32941 |
| lnc-NDC80-5:1     | 1.607328 | 2.257171 | 4.043399 | 0.007986 | 0.105722 | -2.32961 |
| MSTRG.23543.1     | 1.010915 | 4.627258 | 4.041699 | 0.008001 | 0.105838 | -2.33155 |
| ENST00000450936.1 | -1.47687 | 3.969939 | -4.03978 | 0.008017 | 0.105951 | -2.33374 |
| NONHSAT154068.1   | 1.075413 | 4.737334 | 4.039201 | 0.008022 | 0.105956 | -2.33439 |
| lnc-PIEZO2-6:3    | 1.051188 | 3.604745 | 4.038939 | 0.008025 | 0.105956 | -2.33469 |
| lnc-C3orf30-11:1  | 1.501716 | 2.994389 | 4.038156 | 0.008031 | 0.105996 | -2.33558 |
| ENST00000420548.1 | -1.65647 | 2.406502 | -4.03555 | 0.008054 | 0.106062 | -2.33854 |
| NONHSAT206064.1   | 1.20357  | 1.710175 | 4.035188 | 0.008057 | 0.106062 | -2.33896 |
| NONHSAT219993.1   | 1.13966  | 2.467699 | 4.035041 | 0.008058 | 0.106062 | -2.33913 |
| lnc-PTGR1-2:1     | 1.396118 | 4.876686 | 4.035004 | 0.008058 | 0.106062 | -2.33917 |
| NR_120430         | -1.25747 | 5.205317 | -4.03432 | 0.008064 | 0.106084 | -2.33995 |
| NONHSAT157805.1   | 1.426563 | 1.732988 | 4.033502 | 0.008071 | 0.106148 | -2.34088 |
| MSTRG.49733.1     | 1.036128 | 2.773907 | 4.032745 | 0.008078 | 0.106148 | -2.34174 |
| lnc-ADAMTS9-5:1   | -1.07285 | 4.307611 | -4.03214 | 0.008083 | 0.106179 | -2.34243 |
| lnc-CROCC-6:2     | -1.37691 | 2.911321 | -4.03122 | 0.008091 | 0.106227 | -2.34348 |
| lnc-GREB1-14:1    | 1.300332 | 1.953826 | 4.030521 | 0.008097 | 0.106256 | -2.34428 |
| NONHSAT158563.1   | 1.751866 | 3.216698 | 4.030496 | 0.008097 | 0.106256 | -2.3443  |
| lnc-TMEM114-7:1   | -1.06119 | 5.167236 | -4.03012 | 0.008101 | 0.106264 | -2.34473 |
| lnc-MYLK4-16:1    | 1.437717 | 2.857805 | 4.02649  | 0.008132 | 0.10649  | -2.34887 |
| ENST00000422042.1 | -1.69785 | 3.758831 | -4.02591 | 0.008137 | 0.106514 | -2.34953 |
| MSTRG.7437.6      | 1.13929  | 6.390686 | 4.025741 | 0.008139 | 0.10652  | -2.34973 |
| NONHSAT179281.1   | 1.306051 | 2.901773 | 4.025093 | 0.008144 | 0.106566 | -2.35046 |
| NONHSAT214795.1   | 1.211733 | 5.687895 | 4.024686 | 0.008148 | 0.106579 | -2.35093 |

|                   |          |          |          |          |          |          |
|-------------------|----------|----------|----------|----------|----------|----------|
| ENST00000430111.1 | -1.63732 | 2.783592 | -4.02461 | 0.008148 | 0.106579 | -2.35101 |
| MSTRG.37165.1     | -1       | 1.591958 | -4.02409 | 0.008153 | 0.106612 | -2.35161 |
| lnc-SLC36A2-1:1   | 1.185347 | 3.741885 | 4.022153 | 0.00817  | 0.106686 | -2.35382 |
| MSTRG.43901.1     | -1.01798 | 1.616006 | -4.02166 | 0.008174 | 0.106704 | -2.35438 |
| MSTRG.27493.20    | -1.16038 | 3.795959 | -4.02051 | 0.008184 | 0.106753 | -2.35569 |
| ENST00000661265.1 | -1.17095 | 1.81432  | -4.0203  | 0.008186 | 0.106753 | -2.35594 |
| ENST00000671014.1 | 1.07007  | 1.748365 | 4.020027 | 0.008189 | 0.106753 | -2.35625 |
| NONHSAT186672.1   | 1.209839 | 3.365082 | 4.018837 | 0.008199 | 0.106825 | -2.35761 |
| lnc-LRP1B-4:7     | 1.701532 | 2.397848 | 4.017259 | 0.008213 | 0.106895 | -2.35941 |
| NONHSAT157050.1   | 1.688589 | 2.0848   | 4.015679 | 0.008227 | 0.106993 | -2.36121 |
| MSTRG.292.1       | 1.362997 | 2.084601 | 4.015124 | 0.008232 | 0.107021 | -2.36184 |
| NONHSAT216320.1   | -1.65327 | 3.393106 | -4.01507 | 0.008232 | 0.107021 | -2.3619  |
| MSTRG.64486.1     | 1.337186 | 2.663582 | 4.014412 | 0.008238 | 0.107045 | -2.36266 |
| T242581           | 1.080826 | 4.380169 | 4.01405  | 0.008241 | 0.107045 | -2.36307 |
| NONHSAT172167.1   | 1.123273 | 6.542903 | 4.013923 | 0.008242 | 0.107045 | -2.36322 |
| NONHSAT200938.1   | 1.361256 | 2.649975 | 4.01366  | 0.008245 | 0.107045 | -2.36352 |
| lnc-UBAC2-5:1     | -1.05331 | 4.87614  | -4.01229 | 0.008257 | 0.107123 | -2.36508 |
| MSTRG.53793.1     | 1.065966 | 1.600813 | 4.011887 | 0.00826  | 0.107126 | -2.36554 |
| NONHSAT169482.1   | 1.1751   | 1.676008 | 4.011875 | 0.00826  | 0.107126 | -2.36556 |
| NR_109771         | 1.186859 | 7.438677 | 4.010516 | 0.008272 | 0.107186 | -2.36711 |
| ENST00000611726.1 | -1.06762 | 4.365456 | -4.00979 | 0.008279 | 0.107219 | -2.36795 |
| ENST00000565300.2 | 1.665091 | 4.650706 | 4.009042 | 0.008286 | 0.107273 | -2.3688  |
| lnc-SMIM23-1:1    | 1.799827 | 4.558396 | 4.006912 | 0.008305 | 0.107394 | -2.37123 |
| NONHSAT215224.1   | 1.33887  | 1.773867 | 4.004235 | 0.008328 | 0.107496 | -2.37429 |
| lnc-PIGM-4:1      | 1.188472 | 2.156534 | 4.000664 | 0.00836  | 0.107813 | -2.37838 |
| NONHSAT207883.1   | 1.077146 | 3.308324 | 3.999859 | 0.008368 | 0.107818 | -2.3793  |
| NONHSAT203390.1   | 1.351077 | 2.131781 | 3.999839 | 0.008368 | 0.107818 | -2.37932 |
| MSTRG.35148.1     | 1.226128 | 1.868291 | 3.999546 | 0.00837  | 0.107818 | -2.37966 |
| lnc-DDHD1-1:1     | 1.195971 | 3.194185 | 3.999197 | 0.008374 | 0.10782  | -2.38006 |
| NONHSAT220293.1   | 1.202071 | 3.75877  | 3.998738 | 0.008378 | 0.107839 | -2.38058 |
| NONHSAT202618.1   | -1.64918 | 3.047589 | -3.99806 | 0.008384 | 0.107881 | -2.38136 |
| MSTRG.50297.2     | 1.151166 | 9.534498 | 3.997439 | 0.008389 | 0.107905 | -2.38207 |
| NONHSAT218080.1   | 1.890859 | 3.205138 | 3.997178 | 0.008392 | 0.107905 | -2.38237 |
| NONHSAT217235.1   | 1.710368 | 2.538519 | 3.997014 | 0.008393 | 0.107905 | -2.38256 |
| lnc-ZBTB7C-4:1    | -1.07751 | 4.844121 | -3.99673 | 0.008396 | 0.107911 | -2.38288 |
| MSTRG.46476.3     | -1.02539 | 2.311433 | -3.99591 | 0.008403 | 0.107941 | -2.38382 |
| NONHSAT208513.1   | -1.25509 | 1.751364 | -3.99587 | 0.008404 | 0.107941 | -2.38387 |
| NONHSAT199389.1   | 1.881841 | 2.533062 | 3.994861 | 0.008413 | 0.108017 | -2.38503 |
| NONHSAT162536.1   | -1.41139 | 1.917987 | -3.99404 | 0.00842  | 0.108086 | -2.38597 |
| MSTRG.60712.1     | 1.71941  | 2.734177 | 3.993555 | 0.008425 | 0.108114 | -2.38652 |
| MSTRG.2969.1      | 1.418581 | 1.811549 | 3.99275  | 0.008432 | 0.108138 | -2.38744 |
| NONHSAT222139.1   | 1.512153 | 2.297814 | 3.992356 | 0.008435 | 0.108138 | -2.3879  |
| lnc-PCDH17-1:1    | 1.312134 | 1.68536  | 3.992206 | 0.008437 | 0.108138 | -2.38807 |
| MSTRG.29873.1     | 1.616055 | 3.537503 | 3.991875 | 0.00844  | 0.108138 | -2.38845 |
| ENST00000418574.3 | -1.37086 | 2.961508 | -3.99181 | 0.00844  | 0.108138 | -2.38852 |
| NONHSAT205859.1   | 1.536276 | 1.877199 | 3.990628 | 0.008451 | 0.108221 | -2.38988 |
| ENST00000522896.1 | 1.52988  | 2.202327 | 3.989971 | 0.008457 | 0.108242 | -2.39063 |
| lnc-CLIC5-2:1     | -1.781   | 2.764477 | -3.9896  | 0.00846  | 0.108272 | -2.39105 |

|                   |          |          |          |          |          |          |
|-------------------|----------|----------|----------|----------|----------|----------|
| NONHSAT208011.1   | -1.11397 | 4.903735 | -3.98879 | 0.008468 | 0.108338 | -2.39198 |
| lnc-YES1-11:1     | 1.126945 | 1.759075 | 3.987688 | 0.008478 | 0.108402 | -2.39325 |
| NONHSAT154158.1   | -1.27174 | 2.831676 | -3.98753 | 0.008479 | 0.108402 | -2.39343 |
| NONHSAT156519.1   | 1.229826 | 3.836478 | 3.987178 | 0.008482 | 0.108403 | -2.39383 |
| lnc-DYNC1H1-4:1   | -1.39722 | 2.810277 | -3.98701 | 0.008484 | 0.108409 | -2.39403 |
| NONHSAT157738.1   | 1.106532 | 3.214956 | 3.98669  | 0.008487 | 0.108416 | -2.39439 |
| NONHSAT154282.1   | 1.310856 | 7.590467 | 3.986551 | 0.008488 | 0.108416 | -2.39455 |
| lnc-MAGEA1-1:2    | 2.00141  | 2.565973 | 3.986449 | 0.008489 | 0.108416 | -2.39467 |
| ENST00000453155.1 | 1.172434 | 4.566451 | 3.985735 | 0.008496 | 0.108442 | -2.39549 |
| NONHSAT200356.1   | -1.02778 | 4.011453 | -3.98466 | 0.008506 | 0.108449 | -2.39672 |
| lnc-CDK13-6:1     | 1.982354 | 3.06054  | 3.984658 | 0.008506 | 0.108449 | -2.39672 |
| NONHSAT184311.1   | -1.22173 | 1.92906  | -3.98455 | 0.008507 | 0.108449 | -2.39685 |
| lnc-ZC3H11B-10:1  | -1.21749 | 2.110881 | -3.98429 | 0.008509 | 0.108449 | -2.39715 |
| NONHSAT161030.1   | 1.536397 | 4.256411 | 3.984197 | 0.00851  | 0.108449 | -2.39725 |
| lnc-ALDH1L2-1:5   | -1.08681 | 4.057121 | -3.98413 | 0.00851  | 0.108449 | -2.39733 |
| lnc-RNF43-1:1     | 1.256697 | 4.755517 | 3.983902 | 0.008512 | 0.108449 | -2.39759 |
| MSTRG.8195.1      | -1.06237 | 3.22574  | -3.9838  | 0.008513 | 0.108449 | -2.39771 |
| ENST00000437515.1 | -1.31617 | 1.894775 | -3.9825  | 0.008525 | 0.108541 | -2.3992  |
| lnc-LARP4-5:1     | -1.63461 | 2.77019  | -3.97931 | 0.008555 | 0.108722 | -2.40286 |
| NONHSAT223731.1   | 1.318403 | 1.723371 | 3.979215 | 0.008556 | 0.108722 | -2.40297 |
| T080916           | -1.26417 | 1.924134 | -3.97884 | 0.008559 | 0.108722 | -2.4034  |
| NONHSAT154069.1   | 1.4996   | 4.482701 | 3.977886 | 0.008568 | 0.108759 | -2.4045  |
| NONHSAT186902.1   | 1.74691  | 2.096071 | 3.9769   | 0.008577 | 0.108809 | -2.40563 |
| NONHSAT189364.1   | 1.596955 | 2.367399 | 3.976366 | 0.008582 | 0.108846 | -2.40624 |
| NR_037694         | 2.142766 | 2.986615 | 3.975127 | 0.008593 | 0.108846 | -2.40766 |
| NONHSAT206818.1   | 1.241578 | 1.717062 | 3.974694 | 0.008597 | 0.108846 | -2.40816 |
| ENST00000656212.1 | -1.34569 | 4.215659 | -3.97416 | 0.008602 | 0.108846 | -2.40877 |
| MSTRG.7002.1      | -1.12546 | 1.694085 | -3.97337 | 0.00861  | 0.108888 | -2.40969 |
| lnc-ENO1-5:1      | -1.01183 | 3.064772 | -3.97274 | 0.008615 | 0.108928 | -2.4104  |
| MSTRG.38906.1     | -1.78956 | 2.281364 | -3.97252 | 0.008618 | 0.108941 | -2.41066 |
| ENST00000584078.1 | -1.47051 | 2.074585 | -3.97202 | 0.008622 | 0.108958 | -2.41123 |
| NONHSAT191786.1   | 1.445554 | 1.826353 | 3.970929 | 0.008632 | 0.108984 | -2.41249 |
| NONHSAT193536.1   | -1.53582 | 3.590868 | -3.97076 | 0.008634 | 0.108984 | -2.41269 |
| NONHSAT181130.1   | 1.430171 | 3.026052 | 3.97041  | 0.008637 | 0.108997 | -2.41309 |
| NONHSAT166059.1   | 2.439399 | 2.949194 | 3.969362 | 0.008647 | 0.109049 | -2.41429 |
| lnc-MINDY2-7:1    | -1.00229 | 4.491932 | -3.96932 | 0.008647 | 0.109049 | -2.41434 |
| MSTRG.10683.2     | -1.12188 | 2.216176 | -3.96928 | 0.008648 | 0.109049 | -2.41439 |
| MSTRG.48286.1     | -1.46061 | 3.071226 | -3.96908 | 0.00865  | 0.109058 | -2.41462 |
| MSTRG.67708.1     | 1.138747 | 6.048587 | 3.968196 | 0.008658 | 0.109132 | -2.41563 |
| ENST00000450893.1 | 1.39559  | 3.671218 | 3.967905 | 0.00866  | 0.109132 | -2.41597 |
| lnc-ROPN1L-7:1    | -1.04759 | 4.988568 | -3.96607 | 0.008678 | 0.109276 | -2.41807 |
| NONHSAT194275.1   | -1.3724  | 4.957748 | -3.96544 | 0.008684 | 0.109297 | -2.41881 |
| ENST00000608671.1 | -1.02635 | 3.861947 | -3.96465 | 0.008691 | 0.109331 | -2.41971 |
| lnc-LRMDA-14:1    | 1.408546 | 2.189586 | 3.964649 | 0.008691 | 0.109331 | -2.41971 |
| NR_109890         | 1.154124 | 5.3414   | 3.964474 | 0.008693 | 0.109331 | -2.41991 |
| T159314           | -1.12889 | 2.271105 | -3.96429 | 0.008694 | 0.109331 | -2.42013 |
| ENST00000423568.2 | 1.455472 | 2.415564 | 3.963909 | 0.008698 | 0.109331 | -2.42056 |
| T104965           | 1.390872 | 2.927658 | 3.96376  | 0.008699 | 0.109331 | -2.42073 |

|                   |          |          |          |          |          |          |
|-------------------|----------|----------|----------|----------|----------|----------|
| NONHSAT161377.1   | 1.732111 | 1.983694 | 3.963217 | 0.008704 | 0.10936  | -2.42136 |
| T219085           | 1.442084 | 2.194406 | 3.962654 | 0.00871  | 0.10936  | -2.42201 |
| NONHSAT222168.1   | -1.48849 | 3.567146 | -3.96109 | 0.008724 | 0.109387 | -2.42381 |
| ENST00000562900.1 | 1.449466 | 2.7851   | 3.960774 | 0.008727 | 0.109411 | -2.42417 |
| NONHSAT150736.1   | 1.5465   | 2.319667 | 3.960282 | 0.008732 | 0.109442 | -2.42474 |
| lnc-FRRS1-3:1     | -1.56799 | 2.702945 | -3.95951 | 0.008739 | 0.109506 | -2.42563 |
| MSTRG.38386.2     | 1.500294 | 4.024423 | 3.955968 | 0.008773 | 0.10983  | -2.42971 |
| ENST00000648709.1 | 1.09639  | 1.976518 | 3.955576 | 0.008777 | 0.109863 | -2.43016 |
| NONHSAT198358.1   | 2.39998  | 2.963601 | 3.954922 | 0.008783 | 0.109927 | -2.43091 |
| lnc-NUCB2-10:1    | -1.05788 | 2.861358 | -3.95427 | 0.008789 | 0.109927 | -2.43166 |
| NONHSAT179017.1   | -1.31392 | 2.067615 | -3.9536  | 0.008795 | 0.109949 | -2.43243 |
| ENST00000569873.1 | -1.62864 | 2.460994 | -3.95346 | 0.008797 | 0.109949 | -2.4326  |
| lnc-CFH-4:2       | 1.085837 | 1.615144 | 3.952203 | 0.008809 | 0.110046 | -2.43404 |
| lnc-CCR4-3:1      | 2.191998 | 2.830103 | 3.95074  | 0.008823 | 0.110163 | -2.43573 |
| ENST00000670424.1 | 1.2417   | 2.180638 | 3.949806 | 0.008831 | 0.110189 | -2.43681 |
| ENST00000445000.2 | -1.58929 | 2.522361 | -3.94968 | 0.008833 | 0.110189 | -2.43695 |
| lnc-ZMYND19-2:1   | -1.21469 | 2.630306 | -3.94926 | 0.008837 | 0.110189 | -2.43743 |
| lnc-TMEM123-2:1   | 1.33267  | 1.753837 | 3.949122 | 0.008838 | 0.110189 | -2.4376  |
| lnc-IL12RB2-6:1   | 1.031296 | 5.19677  | 3.948907 | 0.00884  | 0.110189 | -2.43784 |
| MSTRG.35407.1     | 1.112065 | 5.854054 | 3.948829 | 0.008841 | 0.110189 | -2.43793 |
| NONHSAT203637.1   | 1.15076  | 3.020818 | 3.948503 | 0.008844 | 0.110214 | -2.43831 |
| lnc-AKAIN1-9:1    | -1.31509 | 6.25627  | -3.9483  | 0.008846 | 0.110225 | -2.43854 |
| NONHSAT176042.1   | 1.476152 | 1.816406 | 3.948181 | 0.008847 | 0.110225 | -2.43868 |
| NONHSAT158053.1   | -1.00793 | 4.694194 | -3.94737 | 0.008855 | 0.110254 | -2.43962 |
| MSTRG.45063.1     | 1.067761 | 5.965307 | 3.946873 | 0.00886  | 0.1103   | -2.44019 |
| NONHSAT224375.1   | -1.08775 | 4.115565 | -3.94442 | 0.008883 | 0.110429 | -2.44302 |
| lnc-UTS2R-1:1     | -1.53419 | 2.542454 | -3.94401 | 0.008887 | 0.110446 | -2.44349 |
| NONHSAT198660.1   | 1.403132 | 2.05627  | 3.944009 | 0.008887 | 0.110446 | -2.44349 |
| NONHSAT173193.1   | 1.028237 | 2.056041 | 3.943658 | 0.00889  | 0.110446 | -2.4439  |
| NONHSAT193899.1   | -1.627   | 1.980116 | -3.94345 | 0.008892 | 0.110446 | -2.44415 |
| MSTRG.8150.1      | 1.158721 | 3.964822 | 3.942478 | 0.008902 | 0.110446 | -2.44526 |
| NONHSAT210262.1   | 1.153616 | 1.599777 | 3.942459 | 0.008902 | 0.110446 | -2.44528 |
| ENST00000648393.1 | 2.244665 | 3.379325 | 3.941507 | 0.008911 | 0.110496 | -2.44638 |
| ENST00000453367.1 | 1.268762 | 2.52643  | 3.940622 | 0.00892  | 0.110557 | -2.4474  |
| MSTRG.45548.1     | -1.64006 | 3.076187 | -3.94004 | 0.008925 | 0.110587 | -2.44808 |
| NONHSAT191779.1   | 2.016974 | 2.636867 | 3.939592 | 0.00893  | 0.110613 | -2.44859 |
| NONHSAT205159.1   | 1.550579 | 2.27036  | 3.939263 | 0.008933 | 0.110635 | -2.44897 |
| ENST00000418927.2 | -1.3803  | 3.310393 | -3.93823 | 0.008943 | 0.11065  | -2.45017 |
| MSTRG.34704.1     | -1.59029 | 2.170507 | -3.93732 | 0.008952 | 0.110661 | -2.45122 |
| NONHSAT158592.1   | 1.186262 | 2.416644 | 3.937036 | 0.008954 | 0.110675 | -2.45154 |
| NONHSAT172942.1   | 1.147151 | 3.640621 | 3.934394 | 0.00898  | 0.110817 | -2.4546  |
| NONHSAT160092.1   | -1.31047 | 1.924537 | -3.93438 | 0.00898  | 0.110817 | -2.45461 |
| lnc-ZNF585B-2:1   | -1.06932 | 5.062139 | -3.9334  | 0.00899  | 0.11085  | -2.45575 |
| NONHSAT187290.1   | 1.123112 | 1.679669 | 3.933064 | 0.008993 | 0.110853 | -2.45613 |
| NONHSAT201842.1   | 1.030849 | 3.720507 | 3.932715 | 0.008996 | 0.110878 | -2.45654 |
| lnc-P2RX7-2:1     | 1.426509 | 2.093406 | 3.930993 | 0.009013 | 0.110967 | -2.45853 |
| ENST00000667899.1 | 1.371826 | 4.342542 | 3.930388 | 0.009019 | 0.110999 | -2.45923 |
| NONHSAT180461.1   | -1.11412 | 4.659786 | -3.92974 | 0.009026 | 0.111025 | -2.45997 |

|                   |          |          |          |          |          |          |
|-------------------|----------|----------|----------|----------|----------|----------|
| MSTRG.45766.1     | 1.445857 | 2.657816 | 3.92972  | 0.009026 | 0.111025 | -2.46    |
| NONHSAT159456.1   | 1.659042 | 1.915981 | 3.929057 | 0.009032 | 0.111057 | -2.46077 |
| ENST00000533740.1 | -1.53089 | 5.769914 | -3.92898 | 0.009033 | 0.111057 | -2.46085 |
| lnc-CREBZF-6:1    | 1.368854 | 1.998786 | 3.928635 | 0.009036 | 0.111057 | -2.46125 |
| NONHSAT169623.1   | -1.22433 | 4.182887 | -3.92724 | 0.00905  | 0.11114  | -2.46287 |
| ENST00000412654.1 | 1.374735 | 4.153765 | 3.927193 | 0.009051 | 0.11114  | -2.46292 |
| ENST00000418747.2 | -1.32503 | 3.436738 | -3.92602 | 0.009062 | 0.11121  | -2.46428 |
| lnc-MAK16-1:6     | 1.40271  | 1.751209 | 3.925818 | 0.009064 | 0.11121  | -2.46451 |
| lnc-CAB39-1:1     | -1.03763 | 3.880679 | -3.92563 | 0.009066 | 0.11121  | -2.46474 |
| ENST00000636059.1 | 1.504732 | 2.302243 | 3.924442 | 0.009078 | 0.11129  | -2.4661  |
| ENST00000428903.1 | 1.511452 | 2.603256 | 3.924378 | 0.009078 | 0.11129  | -2.46618 |
| lnc-ARHGDI3-4:1   | 1.27629  | 1.725412 | 3.923961 | 0.009082 | 0.11129  | -2.46666 |
| NONHSAT197035.1   | -1.00299 | 4.28401  | -3.92299 | 0.009092 | 0.111364 | -2.46779 |
| lnc-ZNF835-3:1    | -1.11233 | 1.835813 | -3.92204 | 0.009101 | 0.11141  | -2.46889 |
| lnc-PTGS2-7:1     | -1.0874  | 4.120262 | -3.92194 | 0.009102 | 0.11141  | -2.469   |
| NONHSAT218656.1   | 1.661683 | 3.682566 | 3.921732 | 0.009104 | 0.111421 | -2.46924 |
| NONHSAT164737.1   | 1.084076 | 2.834814 | 3.921442 | 0.009107 | 0.111429 | -2.46958 |
| lnc-GLI3-5:1      | -1.06436 | 3.946592 | -3.92109 | 0.009111 | 0.111445 | -2.46999 |
| lnc-C11orf53-3:1  | 1.01792  | 1.584982 | 3.920221 | 0.009119 | 0.111536 | -2.47099 |
| NONHSAT200605.1   | -1.26985 | 2.452886 | -3.91972 | 0.009124 | 0.111574 | -2.47157 |
| MSTRG.33020.1     | -1.79427 | 2.492544 | -3.91907 | 0.009131 | 0.111622 | -2.47232 |
| lnc-NUP35-4:2     | -1.50699 | 2.728742 | -3.9188  | 0.009133 | 0.11164  | -2.47263 |
| MSTRG.70287.1     | -1.71705 | 3.297024 | -3.91753 | 0.009146 | 0.111727 | -2.4741  |
| T360844           | 1.879024 | 2.268215 | 3.916833 | 0.009153 | 0.111772 | -2.47491 |
| lnc-CHAT-1:1      | -2.16896 | 3.441754 | -3.91683 | 0.009153 | 0.111772 | -2.47492 |
| lnc-C15orf41-17:1 | 2.087531 | 2.700947 | 3.916083 | 0.00916  | 0.111795 | -2.47578 |
| NONHSAT152664.1   | 1.007283 | 6.012201 | 3.915243 | 0.009169 | 0.111836 | -2.47676 |
| lnc-ICOSLG-6:12   | 1.873545 | 2.102155 | 3.914066 | 0.00918  | 0.111841 | -2.47812 |
| lnc-ESRRG-3:1     | -1.53055 | 3.13258  | -3.91336 | 0.009188 | 0.111841 | -2.47894 |
| NONHSAT193339.1   | -1.29631 | 2.590089 | -3.91332 | 0.009188 | 0.111841 | -2.47898 |
| NONHSAT174534.1   | -1.72252 | 1.995273 | -3.91127 | 0.009208 | 0.111961 | -2.48136 |
| NONHSAT179296.1   | 1.540235 | 2.247371 | 3.910855 | 0.009213 | 0.111971 | -2.48184 |
| lnc-CNTN2-3:1     | -1.52905 | 3.60715  | -3.91001 | 0.009221 | 0.112007 | -2.48282 |
| lnc-SF3B2-1:1     | 1.448571 | 4.056828 | 3.908992 | 0.009231 | 0.112051 | -2.484   |
| lnc-ANO3-6:1      | 1.411809 | 1.88656  | 3.908948 | 0.009232 | 0.112051 | -2.48405 |
| ENST00000417957.1 | 1.331843 | 3.085509 | 3.908045 | 0.009241 | 0.112107 | -2.4851  |
| NONHSAT154935.1   | 1.017326 | 4.628587 | 3.906581 | 0.009256 | 0.112215 | -2.4868  |
| lnc-VTI1A-8:1     | -1.04372 | 5.696755 | -3.90628 | 0.009259 | 0.112225 | -2.48714 |
| ENST00000671634.1 | 1.016111 | 4.139383 | 3.902693 | 0.009295 | 0.112463 | -2.49131 |
| NONHSAT172765.1   | 1.007584 | 4.693834 | 3.902408 | 0.009298 | 0.112463 | -2.49164 |
| lnc-ERI1-8:2      | -1.03855 | 1.924144 | -3.9022  | 0.0093   | 0.112468 | -2.49188 |
| NONHSAT190550.1   | 1.40744  | 3.733755 | 3.902143 | 0.0093   | 0.112468 | -2.49195 |
| NR_125907         | 1.085016 | 2.801997 | 3.901285 | 0.009309 | 0.112498 | -2.49294 |
| lnc-RGSL1-7:1     | -1.16715 | 4.980419 | -3.90107 | 0.009311 | 0.112501 | -2.4932  |
| T340968           | 1.093584 | 8.150722 | 3.900995 | 0.009312 | 0.112501 | -2.49328 |
| ENST00000457477.2 | 1.112582 | 1.888453 | 3.900374 | 0.009318 | 0.112535 | -2.494   |
| NONHSAT201534.1   | 1.632176 | 2.3319   | 3.899876 | 0.009323 | 0.11255  | -2.49458 |
| NONHSAT215515.1   | 1.012069 | 5.028979 | 3.899471 | 0.009327 | 0.112553 | -2.49505 |

|                   |          |          |          |          |          |          |
|-------------------|----------|----------|----------|----------|----------|----------|
| lnc-PFN2-4:1      | -1.01993 | 4.333054 | -3.89859 | 0.009336 | 0.112581 | -2.49607 |
| lnc-MYB-3:3       | 1.313534 | 2.079214 | 3.896046 | 0.009362 | 0.11279  | -2.49903 |
| MSTRG.54962.1     | -1.10318 | 3.542718 | -3.8958  | 0.009365 | 0.11279  | -2.49932 |
| ENST00000645557.1 | 1.911836 | 3.09938  | 3.895661 | 0.009366 | 0.11279  | -2.49948 |
| NONHSAT174536.1   | 1.010237 | 4.974774 | 3.894822 | 0.009375 | 0.112841 | -2.50045 |
| lnc-PLPP4-4:3     | 1.083611 | 3.800771 | 3.894159 | 0.009382 | 0.112898 | -2.50122 |
| MSTRG.65941.1     | -1.22766 | 3.185904 | -3.89413 | 0.009382 | 0.112898 | -2.50126 |
| ENST00000555316.1 | -1.37766 | 3.637727 | -3.89402 | 0.009383 | 0.112898 | -2.50138 |
| lnc-HEBP1-1:1     | 1.003762 | 4.144501 | 3.893607 | 0.009387 | 0.112924 | -2.50186 |
| ENST00000423593.1 | 1.113944 | 1.605575 | 3.893224 | 0.009391 | 0.112944 | -2.50231 |
| NONHSAT204618.1   | 1.360176 | 2.338082 | 3.891388 | 0.00941  | 0.113055 | -2.50444 |
| lnc-SLC39A10-7:1  | 1.673749 | 2.038416 | 3.888546 | 0.009439 | 0.113222 | -2.50775 |
| NONHSAT194206.1   | 1.263937 | 2.971447 | 3.888346 | 0.009441 | 0.113222 | -2.50798 |
| lnc-LUZP2-5:1     | 1.516702 | 1.850201 | 3.888303 | 0.009442 | 0.113222 | -2.50803 |
| MSTRG.69484.1     | -1.92737 | 2.796952 | -3.8849  | 0.009477 | 0.11346  | -2.51199 |
| NONHSAT218311.1   | 2.098018 | 3.228697 | 3.884778 | 0.009478 | 0.113461 | -2.51213 |
| ENST00000670832.1 | -1.54943 | 4.407428 | -3.88332 | 0.009493 | 0.113568 | -2.51382 |
| NONHSAT171875.1   | 1.990598 | 3.154587 | 3.883117 | 0.009495 | 0.113573 | -2.51406 |
| NONHSAT200526.1   | 1.076285 | 1.746364 | 3.882695 | 0.0095   | 0.113581 | -2.51455 |
| ENST00000512599.1 | 1.048571 | 7.509676 | 3.882436 | 0.009502 | 0.113581 | -2.51486 |
| T284768           | -1.09837 | 1.752204 | -3.88244 | 0.009502 | 0.113581 | -2.51486 |
| lnc-MAP4-1:1      | -1.30887 | 2.77798  | -3.88147 | 0.009512 | 0.113589 | -2.51598 |
| lnc-BIK-2:1       | 1.188841 | 10.5758  | 3.880101 | 0.009527 | 0.113683 | -2.51757 |
| MSTRG.21844.1     | -1.46488 | 2.171143 | -3.87896 | 0.009538 | 0.113779 | -2.5189  |
| MSTRG.183.1       | -1.06335 | 3.651128 | -3.87841 | 0.009544 | 0.11382  | -2.51954 |
| lnc-USP6NL-18:1   | 1.009763 | 1.616546 | 3.876773 | 0.009561 | 0.113937 | -2.52145 |
| T293184           | -1.22767 | 2.903839 | -3.87658 | 0.009563 | 0.113937 | -2.52167 |
| lnc-FUT8-3:1      | 1.361333 | 1.773472 | 3.876533 | 0.009564 | 0.113937 | -2.52173 |
| NONHSAT172452.1   | 1.098893 | 1.629889 | 3.875988 | 0.00957  | 0.113961 | -2.52236 |
| NONHSAT199019.1   | 1.404305 | 1.778804 | 3.875806 | 0.009571 | 0.11397  | -2.52258 |
| ENST00000456585.5 | 1.00804  | 3.756071 | 3.875305 | 0.009577 | 0.114005 | -2.52316 |
| ENST00000619338.1 | -1.62304 | 2.326061 | -3.87448 | 0.009585 | 0.114068 | -2.52412 |
| ENST00000423515.2 | 1.384894 | 1.713784 | 3.874273 | 0.009587 | 0.11408  | -2.52436 |
| MSTRG.33765.1     | 1.511184 | 2.600181 | 3.873871 | 0.009592 | 0.114087 | -2.52483 |
| NONHSAT214975.1   | 1.184721 | 1.965558 | 3.873742 | 0.009593 | 0.114087 | -2.52498 |
| T014019           | -1.46716 | 2.458617 | -3.87363 | 0.009594 | 0.114087 | -2.52511 |
| NONHSAT178920.1   | 1.104452 | 3.663282 | 3.873628 | 0.009594 | 0.114087 | -2.52511 |
| lnc-SSC5D-1:1     | 1.270026 | 2.309652 | 3.873604 | 0.009595 | 0.114087 | -2.52514 |
| NONHSAT167453.1   | 1.214522 | 3.720389 | 3.872995 | 0.009601 | 0.114115 | -2.52585 |
| lnc-AREG-1:6      | -1.56609 | 1.935339 | -3.87294 | 0.009601 | 0.114115 | -2.52591 |
| lnc-EDARADD-4:1   | 1.325722 | 1.754811 | 3.872917 | 0.009602 | 0.114115 | -2.52594 |
| MSTRG.2157.1      | -1.14839 | 1.898762 | -3.87262 | 0.009605 | 0.114138 | -2.52628 |
| MSTRG.63542.1     | 1.194176 | 1.772235 | 3.872436 | 0.009607 | 0.114145 | -2.5265  |
| NONHSAT197504.1   | 1.343088 | 3.001192 | 3.872351 | 0.009608 | 0.114145 | -2.5266  |
| NONHSAT158046.1   | 1.751239 | 8.025779 | 3.872117 | 0.00961  | 0.114161 | -2.52688 |
| lnc-CCL4-1:1      | -1.0987  | 5.005704 | -3.87184 | 0.009613 | 0.114176 | -2.5272  |
| MSTRG.46638.1     | -1.53416 | 2.265094 | -3.87114 | 0.00962  | 0.114176 | -2.52802 |
| lnc-ITPR3-9:1     | 2.083799 | 3.386434 | 3.871031 | 0.009622 | 0.114176 | -2.52814 |

|                    |          |          |          |          |          |          |
|--------------------|----------|----------|----------|----------|----------|----------|
| lnc-STRBP-10:1     | -1.27646 | 2.904614 | -3.86995 | 0.009633 | 0.114266 | -2.5294  |
| NONHSAT204178.1    | 1.090926 | 3.488322 | 3.869572 | 0.009637 | 0.114266 | -2.52984 |
| ENST00000670736.1  | 1.203657 | 3.320309 | 3.8695   | 0.009638 | 0.114266 | -2.52993 |
| MSTRG.40406.1      | -1.37469 | 3.69838  | -3.86946 | 0.009638 | 0.114266 | -2.52997 |
| lnc-KIDINS220-16:1 | 1.444109 | 3.484823 | 3.868951 | 0.009643 | 0.114266 | -2.53057 |
| ENST00000648887.1  | 1.37987  | 2.398083 | 3.868706 | 0.009646 | 0.114266 | -2.53085 |
| MSTRG.45925.1      | -1.70701 | 2.23429  | -3.86827 | 0.009651 | 0.114266 | -2.53136 |
| lnc-EPHA4-3:1      | -1.39858 | 1.856647 | -3.86816 | 0.009652 | 0.114266 | -2.53149 |
| ENST00000649345.1  | 2.050453 | 3.199356 | 3.867126 | 0.009663 | 0.114355 | -2.5327  |
| NONHSAT202594.1    | 1.310462 | 2.437296 | 3.866345 | 0.009671 | 0.114387 | -2.53361 |
| lnc-HPSE-1:1       | -1.21626 | 2.02874  | -3.86571 | 0.009678 | 0.114438 | -2.53435 |
| NONHSAT154722.1    | -1.08738 | 1.731366 | -3.86515 | 0.009684 | 0.114469 | -2.535   |
| NONHSAT205066.1    | 1.19312  | 3.435751 | 3.864915 | 0.009686 | 0.114484 | -2.53527 |
| LINC01619:10       | -1.22056 | 2.301864 | -3.86466 | 0.009689 | 0.114502 | -2.53557 |
| NONHSAT156472.1    | 1.193713 | 3.89596  | 3.863251 | 0.009704 | 0.114545 | -2.53722 |
| MSTRG.38860.1      | 1.666509 | 2.462665 | 3.861249 | 0.009725 | 0.114676 | -2.53955 |
| NONHSAT202036.1    | -1.212   | 2.587208 | -3.85948 | 0.009744 | 0.114793 | -2.54162 |
| MSTRG.5378.1       | -1.01134 | 4.224021 | -3.85946 | 0.009744 | 0.114793 | -2.54164 |
| T078794            | 1.482129 | 2.351905 | 3.858526 | 0.009754 | 0.11486  | -2.54273 |
| lnc-STK24-2:1      | -1.36526 | 3.299146 | -3.8584  | 0.009756 | 0.11486  | -2.54288 |
| lnc-CBX4-2:1       | 1.297621 | 5.453149 | 3.857942 | 0.00976  | 0.114904 | -2.54341 |
| T284338            | 1.12612  | 4.923433 | 3.857377 | 0.009766 | 0.114935 | -2.54407 |
| NONHSAT218592.1    | -1.38795 | 5.433568 | -3.85702 | 0.00977  | 0.114941 | -2.54449 |
| lnc-BAG5-2:1       | 2.10642  | 2.717012 | 3.856194 | 0.009779 | 0.11503  | -2.54546 |
| NONHSAT200975.1    | 1.490985 | 2.657846 | 3.856087 | 0.00978  | 0.11503  | -2.54558 |
| NONHSAT204962.1    | -2.08886 | 3.255487 | -3.85542 | 0.009787 | 0.115053 | -2.54637 |
| NONHSAT175850.1    | -1.33356 | 6.238602 | -3.8553  | 0.009789 | 0.115053 | -2.54651 |
| ENST00000438923.1  | 1.71159  | 2.548777 | 3.854392 | 0.009798 | 0.11506  | -2.54756 |
| UVRAG-DT:22        | 1.499129 | 2.538401 | 3.854253 | 0.0098   | 0.11506  | -2.54772 |
| ENST00000670409.1  | -1.59307 | 3.399853 | -3.85261 | 0.009818 | 0.115087 | -2.54965 |
| NONHSAT162365.1    | 1.055334 | 5.167863 | 3.852376 | 0.00982  | 0.115087 | -2.54992 |
| lnc-BEND7-1:2      | -1.26246 | 2.158958 | -3.85223 | 0.009822 | 0.115087 | -2.55008 |
| MSTRG.49024.1      | 1.885863 | 2.16268  | 3.852129 | 0.009823 | 0.115087 | -2.55021 |
| NONHSAT198912.1    | 1.511208 | 2.149705 | 3.848414 | 0.009863 | 0.115343 | -2.55455 |
| LINC00518:4        | 1.271098 | 1.711345 | 3.848072 | 0.009867 | 0.115359 | -2.55495 |
| MSTRG.28690.1      | -1.45589 | 3.643671 | -3.84747 | 0.009873 | 0.115365 | -2.55566 |
| NONHSAT160987.1    | 1.460253 | 2.69205  | 3.84677  | 0.009881 | 0.115382 | -2.55647 |
| NONHSAT178308.1    | 1.182562 | 7.153385 | 3.845929 | 0.00989  | 0.11542  | -2.55746 |
| lnc-KCNJ12-7:1     | -1.52072 | 2.204429 | -3.8459  | 0.00989  | 0.11542  | -2.55749 |
| lnc-MPV17L2-1:8    | -1.49842 | 2.421029 | -3.84572 | 0.009892 | 0.11543  | -2.5577  |
| MSTRG.42800.1      | -1.58216 | 2.201864 | -3.84545 | 0.009895 | 0.11545  | -2.55801 |
| NONHSAT222338.1    | 1.229052 | 2.692401 | 3.844911 | 0.009901 | 0.115453 | -2.55865 |
| lnc-ADAMTS5-5:1    | 1.291414 | 3.191295 | 3.844356 | 0.009907 | 0.115453 | -2.5593  |
| lnc-DBT-6:1        | -1.03187 | 5.126668 | -3.84428 | 0.009908 | 0.115453 | -2.55938 |
| MSTRG.39196.1      | 1.567131 | 2.397094 | 3.844085 | 0.00991  | 0.115453 | -2.55961 |
| ENST00000657178.1  | 1.204832 | 1.727375 | 3.841996 | 0.009933 | 0.115582 | -2.56206 |
| NONHSAT158154.1    | -1.89046 | 2.999011 | -3.84022 | 0.009952 | 0.115743 | -2.56414 |
| lnc-C8A-7:1        | -1.0542  | 3.144263 | -3.83943 | 0.009961 | 0.115799 | -2.56507 |

|                   |          |          |          |          |          |          |
|-------------------|----------|----------|----------|----------|----------|----------|
| lnc-ZNF627-2:15   | -1.24991 | 4.181356 | -3.83934 | 0.009962 | 0.115799 | -2.56517 |
| lnc-LDB1-1:1      | -1.0279  | 1.674757 | -3.83915 | 0.009964 | 0.1158   | -2.56539 |
| lnc-AKR1C2-3:8    | -1.15458 | 3.890085 | -3.83784 | 0.009978 | 0.115859 | -2.56693 |
| ENST00000607434.1 | -1.52983 | 2.739818 | -3.83749 | 0.009982 | 0.115859 | -2.56734 |
| lnc-GGPS1-17:1    | -1.20399 | 2.22272  | -3.83666 | 0.009991 | 0.115866 | -2.56831 |
| lnc-BMP6-106:140  | 1.266472 | 1.6525   | 3.836512 | 0.009993 | 0.115866 | -2.56848 |
| NONHSAT200585.1   | 1.536081 | 3.50507  | 3.836507 | 0.009993 | 0.115866 | -2.56849 |
| NONHSAT177853.1   | 1.174145 | 3.881665 | 3.835051 | 0.010009 | 0.115939 | -2.57019 |
| NONHSAT192503.1   | 1.144155 | 5.216529 | 3.83475  | 0.010012 | 0.115939 | -2.57055 |
| MSTRG.4610.1      | 1.391137 | 2.529659 | 3.834539 | 0.010014 | 0.115939 | -2.57079 |
| MSTRG.51461.2     | 1.120789 | 5.86919  | 3.8343   | 0.010017 | 0.115939 | -2.57107 |
| NONHSAT189584.1   | 1.160349 | 4.43456  | 3.833635 | 0.010024 | 0.115939 | -2.57185 |
| NONHSAT202837.1   | 1.167694 | 3.567003 | 3.831733 | 0.010045 | 0.116089 | -2.57408 |
| lnc-KMT2C-6:3     | 1.427787 | 5.447492 | 3.830572 | 0.010058 | 0.116103 | -2.57544 |
| NONHSAT153523.1   | -1.42337 | 2.082062 | -3.83048 | 0.010059 | 0.116103 | -2.57556 |
| lnc-ADCYAP1-10:1  | 1.178138 | 3.617882 | 3.830382 | 0.01006  | 0.116103 | -2.57567 |
| lnc-CDKN3-5:1     | -1.0411  | 2.083962 | -3.83035 | 0.010061 | 0.116103 | -2.5757  |
| MSTRG.44815.1     | -1.18589 | 3.684143 | -3.83031 | 0.010061 | 0.116103 | -2.57575 |
| MSTRG.23322.1     | 1.182935 | 4.596596 | 3.829588 | 0.010069 | 0.116131 | -2.5766  |
| T307750           | 1.699051 | 2.925141 | 3.829235 | 0.010073 | 0.116131 | -2.57701 |
| lnc-DNM1L-4:1     | -1.16225 | 4.051164 | -3.82916 | 0.010074 | 0.116131 | -2.5771  |
| MSTRG.30757.1     | -1.84084 | 4.06331  | -3.82761 | 0.010091 | 0.116241 | -2.57892 |
| NONHSAT210575.1   | 1.61731  | 2.603045 | 3.827527 | 0.010092 | 0.116241 | -2.57901 |
| MSTRG.7771.1      | 2.01954  | 2.674019 | 3.827231 | 0.010095 | 0.116266 | -2.57936 |
| lnc-ACADSB-1:1    | 1.125354 | 2.15777  | 3.827106 | 0.010097 | 0.116268 | -2.57951 |
| lnc-ZNF284-2:1    | 1.004221 | 4.506765 | 3.826874 | 0.010099 | 0.116275 | -2.57978 |
| MSTRG.49548.1     | -1.11126 | 4.283781 | -3.82674 | 0.010101 | 0.116275 | -2.57994 |
| ENST00000552413.1 | 1.81209  | 2.557665 | 3.82659  | 0.010102 | 0.116281 | -2.58011 |
| NONHSAT209304.1   | 1.10167  | 1.633954 | 3.826032 | 0.010108 | 0.116313 | -2.58077 |
| MSTRG.58753.1     | -1.23658 | 2.033876 | -3.82384 | 0.010133 | 0.116461 | -2.58334 |
| lnc-CALM3-2:1     | -1.02953 | 2.187816 | -3.82339 | 0.010138 | 0.116492 | -2.58387 |
| MSTRG.36192.1     | 1.205349 | 6.456327 | 3.823305 | 0.010139 | 0.116492 | -2.58397 |
| ENST00000523110.1 | 1.30497  | 3.175166 | 3.821677 | 0.010157 | 0.116619 | -2.58588 |
| NONHSAT195523.1   | 1.971808 | 2.074783 | 3.821345 | 0.010161 | 0.11664  | -2.58627 |
| ENST00000499452.2 | -1.15609 | 3.995433 | -3.82093 | 0.010165 | 0.116648 | -2.58675 |
| NONHSAT224041.1   | 1.348224 | 2.023047 | 3.820588 | 0.010169 | 0.116653 | -2.58716 |
| NONHSAT172098.1   | 1.533187 | 3.484916 | 3.818952 | 0.010188 | 0.116757 | -2.58908 |
| NONHSAT193401.1   | -1.89222 | 2.573967 | -3.81871 | 0.01019  | 0.116762 | -2.58936 |
| ENST00000429074.1 | -1.18365 | 3.905147 | -3.81807 | 0.010198 | 0.11683  | -2.59011 |
| NONHSAT164545.1   | 1.007917 | 1.940907 | 3.81775  | 0.010201 | 0.116851 | -2.59049 |
| NONHSAT217964.1   | -1.36549 | 3.012417 | -3.8177  | 0.010202 | 0.116851 | -2.59055 |
| NONHSAT206809.1   | -2.56518 | 3.529879 | -3.81703 | 0.010209 | 0.116872 | -2.59134 |
| lnc-PAXIP1-3:4    | -1.46114 | 4.022328 | -3.81614 | 0.010219 | 0.116959 | -2.59238 |
| ENST00000603191.2 | -1.04944 | 5.775946 | -3.81385 | 0.010245 | 0.117147 | -2.59507 |
| MSTRG.28504.1     | 1.74256  | 2.819494 | 3.812461 | 0.010261 | 0.117196 | -2.5967  |
| NONHSAT197325.1   | 1.471333 | 2.209405 | 3.811734 | 0.010269 | 0.11725  | -2.59756 |
| MSTRG.69732.1     | -1.7115  | 3.331916 | -3.81142 | 0.010273 | 0.117264 | -2.59793 |
| ENST00000652367.1 | 1.333541 | 2.875964 | 3.811292 | 0.010274 | 0.117267 | -2.59808 |



|                   |          |          |          |          |          |          |
|-------------------|----------|----------|----------|----------|----------|----------|
| NR_038334         | -1.30861 | 3.38108  | -3.81005 | 0.010288 | 0.117352 | -2.59954 |
| MSTRG.12030.1     | -1.22584 | 3.345411 | -3.80957 | 0.010294 | 0.117384 | -2.6001  |
| ENST00000433071.2 | -1.0845  | 5.360235 | -3.80848 | 0.010306 | 0.117485 | -2.60139 |
| MSTRG.58982.1     | 1.341528 | 1.941014 | 3.80823  | 0.010309 | 0.117504 | -2.60168 |
| lnc-CHD2-23:1     | 1.095676 | 5.245153 | 3.807672 | 0.010315 | 0.117546 | -2.60233 |
| NONHSAT153986.1   | 1.178836 | 3.358963 | 3.806647 | 0.010327 | 0.117603 | -2.60354 |
| lnc-KLRB1-1:3     | 1.851585 | 4.065588 | 3.806525 | 0.010328 | 0.117605 | -2.60368 |
| NONHSAT180873.1   | 1.630655 | 2.487227 | 3.806428 | 0.010329 | 0.117605 | -2.6038  |
| lnc-BBOF1-2:1     | -1.37974 | 5.254366 | -3.80507 | 0.010345 | 0.117657 | -2.6054  |
| lnc-DBT-7:1       | -1.21265 | 3.166137 | -3.80465 | 0.01035  | 0.117657 | -2.60589 |
| ENST00000603154.1 | 1.02152  | 3.376057 | 3.804635 | 0.01035  | 0.117657 | -2.60591 |
| NONHSAT222206.1   | 1.116569 | 1.653911 | 3.802761 | 0.010371 | 0.117803 | -2.60811 |
| lnc-BHLHA9-3:1    | -1.24264 | 1.902974 | -3.80232 | 0.010376 | 0.117834 | -2.60864 |
| MSTRG.56458.14    | 1.756445 | 2.523301 | 3.801152 | 0.01039  | 0.117946 | -2.61001 |
| lnc-TERB2-2:1     | 1.797094 | 2.321158 | 3.800826 | 0.010393 | 0.117975 | -2.61039 |
| lnc-TPD52L1-3:1   | -1.11913 | 3.254849 | -3.79944 | 0.010409 | 0.118078 | -2.61202 |
| NONHSAT214461.1   | -1.04961 | 1.618612 | -3.79922 | 0.010412 | 0.118078 | -2.61228 |
| lnc-THAP3-4:1     | -1.32659 | 1.985913 | -3.79865 | 0.010418 | 0.118101 | -2.61295 |
| SNHG1:33          | -1.21313 | 5.657737 | -3.7981  | 0.010425 | 0.118111 | -2.6136  |
| NONHSAT218904.1   | 1.766706 | 4.679776 | 3.798057 | 0.010425 | 0.118111 | -2.61365 |
| NONHSAT174554.1   | -1.75895 | 2.690985 | -3.79732 | 0.010434 | 0.118141 | -2.61452 |
| NONHSAT210587.1   | -1.17469 | 2.322933 | -3.79518 | 0.010458 | 0.1183   | -2.61704 |
| MSTRG.22787.1     | 1.073558 | 4.744765 | 3.794651 | 0.010465 | 0.118356 | -2.61766 |
| lnc-C8orf86-8:1   | 1.051143 | 6.245532 | 3.793034 | 0.010483 | 0.118489 | -2.61957 |
| lnc-TCTA-3:1      | -1.38019 | 3.54482  | -3.79246 | 0.01049  | 0.11851  | -2.62024 |
| lnc-TRMT9B-3:1    | -1.21609 | 2.695138 | -3.79182 | 0.010497 | 0.118528 | -2.621   |
| lnc-CROT-1:1      | 1.089616 | 3.032588 | 3.791637 | 0.010499 | 0.118528 | -2.62121 |
| LIF-AS1:10        | 1.458044 | 4.849593 | 3.791599 | 0.0105   | 0.118528 | -2.62126 |
| lnc-EFCAB11-3:1   | -1.34424 | 3.230416 | -3.79121 | 0.010504 | 0.118555 | -2.62171 |
| ENST00000594562.1 | -1.16225 | 3.599989 | -3.7907  | 0.01051  | 0.118582 | -2.62232 |
| MSTRG.20055.1     | 1.647906 | 2.302267 | 3.790573 | 0.010512 | 0.118583 | -2.62247 |
| MSTRG.39481.4     | 1.140753 | 4.193543 | 3.789699 | 0.010522 | 0.118583 | -2.6235  |
| ENST00000625090.1 | 1.317988 | 2.938899 | 3.789605 | 0.010523 | 0.118583 | -2.62361 |
| NONHSAT178422.1   | 1.45988  | 3.999823 | 3.789382 | 0.010526 | 0.118583 | -2.62387 |
| lnc-CLDN11-8:1    | -1.45183 | 1.850214 | -3.78895 | 0.010531 | 0.118623 | -2.62438 |
| NONHSAT186578.1   | 1.258517 | 6.457885 | 3.788131 | 0.01054  | 0.118654 | -2.62535 |
| NONHSAT157516.1   | -1.01421 | 2.254446 | -3.78776 | 0.010545 | 0.118689 | -2.62579 |
| MSTRG.53542.1     | 1.206671 | 3.307766 | 3.786254 | 0.010562 | 0.118799 | -2.62756 |
| NONHSAT175431.1   | 1.130224 | 3.593206 | 3.785939 | 0.010566 | 0.118823 | -2.62793 |
| ENST00000586389.1 | -1.04023 | 5.654627 | -3.7858  | 0.010567 | 0.118827 | -2.62809 |
| NONHSAT154908.1   | 1.320957 | 4.782253 | 3.785363 | 0.010573 | 0.118854 | -2.62861 |
| lnc-RAB30-6:1     | -1.59674 | 2.746138 | -3.78535 | 0.010573 | 0.118854 | -2.62863 |
| NONHSAT177175.1   | 1.019908 | 3.120193 | 3.785197 | 0.010575 | 0.118854 | -2.62881 |
| ENST00000653239.1 | -1.1091  | 2.152136 | -3.78467 | 0.010581 | 0.118897 | -2.62943 |
| MSTRG.43948.1     | 1.432315 | 3.303831 | 3.784199 | 0.010586 | 0.118897 | -2.62999 |
| lnc-HIST1H2BI-3:1 | 1.709812 | 2.77589  | 3.781966 | 0.010612 | 0.119036 | -2.63262 |
| ENST00000518591.1 | -1.80366 | 3.386293 | -3.78194 | 0.010613 | 0.119036 | -2.63266 |
| NONHSAT212913.1   | 1.513174 | 4.395609 | 3.781608 | 0.010617 | 0.119036 | -2.63304 |

|                   |          |          |          |          |          |          |
|-------------------|----------|----------|----------|----------|----------|----------|
| lnc-PLEKHA2-4:1   | -1.27773 | 4.43981  | -3.78153 | 0.010618 | 0.119036 | -2.63313 |
| NONHSAT219350.1   | -1.65687 | 2.203309 | -3.78087 | 0.010625 | 0.119079 | -2.63391 |
| NONHSAT195442.1   | 1.202145 | 3.15414  | 3.780581 | 0.010629 | 0.119079 | -2.63426 |
| LINC02449:15      | 1.115988 | 4.64218  | 3.780559 | 0.010629 | 0.119079 | -2.63428 |
| lnc-ING2-1:1      | -1.43454 | 2.44521  | -3.78048 | 0.01063  | 0.119079 | -2.63438 |
| ENST00000427132.1 | -1.29153 | 2.329298 | -3.78027 | 0.010632 | 0.11908  | -2.63462 |
| lnc-PRKDC-3:1     | 1.437399 | 2.335439 | 3.778746 | 0.01065  | 0.119228 | -2.63642 |
| lnc-ZNF500-1:3    | 1.150316 | 3.085468 | 3.778629 | 0.010652 | 0.11923  | -2.63656 |
| NONHSAT153734.1   | 1.032318 | 2.225285 | 3.777684 | 0.010663 | 0.1193   | -2.63768 |
| NONHSAT187909.1   | -1.40612 | 1.986258 | -3.7776  | 0.010664 | 0.1193   | -2.63778 |
| lnc-C9orf47-2:1   | -1.12927 | 3.148153 | -3.77702 | 0.010671 | 0.11935  | -2.63846 |
| NONHSAT194118.1   | 1.04849  | 2.071061 | 3.776704 | 0.010674 | 0.119365 | -2.63883 |
| NONHSAT172237.1   | 1.937128 | 2.570552 | 3.776483 | 0.010677 | 0.119378 | -2.6391  |
| NONHSAT186770.1   | 1.280869 | 1.965825 | 3.775733 | 0.010686 | 0.119438 | -2.63998 |
| lnc-FNTB-5:1      | -2.06049 | 2.224538 | -3.77533 | 0.010691 | 0.119455 | -2.64046 |
| ENST00000604491.1 | -1.76468 | 2.320858 | -3.77518 | 0.010692 | 0.119461 | -2.64063 |
| ENST00000616113.1 | -1.28257 | 3.803429 | -3.77362 | 0.010711 | 0.119615 | -2.64248 |
| MSTRG.40358.1     | -1.03025 | 4.166963 | -3.77272 | 0.010722 | 0.119696 | -2.64354 |
| lnc-EIF5-1:2      | 1.502545 | 2.514704 | 3.772625 | 0.010723 | 0.119696 | -2.64365 |
| NONHSAT218699.1   | 1.641284 | 2.736066 | 3.772575 | 0.010723 | 0.119696 | -2.64371 |
| NONHSAT162479.1   | -1.06787 | 3.844036 | -3.77114 | 0.010741 | 0.119746 | -2.64541 |
| T302404           | -1.03842 | 2.146369 | -3.77079 | 0.010745 | 0.119746 | -2.64582 |
| MSTRG.831.1       | 1.154745 | 3.925499 | 3.770333 | 0.01075  | 0.119746 | -2.64636 |
| ENST00000589323.1 | 2.123056 | 3.134453 | 3.770029 | 0.010754 | 0.119746 | -2.64672 |
| NONHSAT166978.1   | 1.744797 | 2.758512 | 3.769746 | 0.010757 | 0.119746 | -2.64706 |
| NONHSAT207417.1   | 1.298428 | 3.497344 | 3.769504 | 0.01076  | 0.119751 | -2.64734 |
| lnc-TMEM250-3:2   | 1.381526 | 2.139897 | 3.769235 | 0.010763 | 0.11976  | -2.64766 |
| NONHSAT206231.1   | -1.38233 | 1.820366 | -3.76726 | 0.010787 | 0.11993  | -2.64999 |
| lnc-KLHL35-4:2    | -1.47812 | 2.446042 | -3.76407 | 0.010825 | 0.120184 | -2.65377 |
| NONHSAT218591.1   | -1.36962 | 1.844357 | -3.76395 | 0.010827 | 0.120185 | -2.65391 |
| NONHSAT164779.1   | 1.738336 | 3.425916 | 3.763065 | 0.010837 | 0.120252 | -2.65496 |
| lnc-ELMOD1-1:1    | 1.412723 | 4.76067  | 3.762657 | 0.010842 | 0.120264 | -2.65544 |
| NONHSAT153502.1   | -1.12497 | 1.973424 | -3.76179 | 0.010853 | 0.120291 | -2.65647 |
| NONHSAT216719.1   | 1.60329  | 1.86661  | 3.761352 | 0.010858 | 0.120291 | -2.65699 |
| NONHSAT218169.1   | 1.533854 | 1.809493 | 3.761166 | 0.01086  | 0.120291 | -2.65721 |
| MSTRG.4494.1      | 1.421776 | 4.884821 | 3.760985 | 0.010862 | 0.120291 | -2.65742 |
| NONHSAT153894.1   | 1.307969 | 4.417941 | 3.760275 | 0.010871 | 0.120339 | -2.65826 |
| NONHSAT172223.1   | -1.43694 | 2.200209 | -3.76023 | 0.010871 | 0.120339 | -2.65831 |
| ENST00000657287.1 | 1.038556 | 4.88357  | 3.759387 | 0.010882 | 0.120426 | -2.65931 |
| NONHSAT159827.1   | -1.59273 | 3.33894  | -3.75926 | 0.010883 | 0.120426 | -2.65947 |
| NONHSAT152816.1   | 1.279167 | 4.247451 | 3.758545 | 0.010892 | 0.12048  | -2.66031 |
| ENST00000430776.2 | 1.835336 | 2.689065 | 3.758107 | 0.010897 | 0.120491 | -2.66083 |
| NONHSAT220255.1   | 1.783824 | 3.015251 | 3.756904 | 0.010912 | 0.120546 | -2.66225 |
| NONHSAT206235.1   | 1.196897 | 4.709728 | 3.756765 | 0.010913 | 0.120546 | -2.66242 |
| lnc-RALGAPA1-3:1  | 1.542112 | 1.881172 | 3.756527 | 0.010916 | 0.120558 | -2.6627  |
| lnc-CRYBA4-20:1   | 1.009317 | 4.239882 | 3.756085 | 0.010922 | 0.120572 | -2.66322 |
| NONHSAT177997.1   | 1.562045 | 2.902425 | 3.755711 | 0.010926 | 0.120588 | -2.66367 |
| MSTRG.3584.1      | 1.486154 | 2.22602  | 3.755027 | 0.010934 | 0.120638 | -2.66448 |

|                   |          |          |          |          |          |          |
|-------------------|----------|----------|----------|----------|----------|----------|
| lnc-EYA3-3:1      | 1.038221 | 4.31874  | 3.754946 | 0.010935 | 0.120638 | -2.66457 |
| NONHSAT198103.1   | 1.456652 | 2.230778 | 3.754284 | 0.010943 | 0.120684 | -2.66536 |
| MSTRG.69496.1     | 1.136919 | 1.659002 | 3.754127 | 0.010945 | 0.120684 | -2.66554 |
| NONHSAT173070.1   | 1.030169 | 2.76306  | 3.754084 | 0.010946 | 0.120684 | -2.66559 |
| MSTRG.53344.1     | 1.547637 | 3.539089 | 3.753473 | 0.010953 | 0.120711 | -2.66632 |
| lnc-PRR32-9:1     | -1.60891 | 2.323708 | -3.75335 | 0.010955 | 0.120711 | -2.66646 |
| lnc-RAB3B-1:1     | -1.24424 | 2.186944 | -3.75326 | 0.010956 | 0.120711 | -2.66657 |
| lnc-PNPLA3-1:11   | 1.45359  | 2.101639 | 3.753125 | 0.010958 | 0.120711 | -2.66673 |
| NONHSAT204047.1   | 1.942957 | 3.055838 | 3.753117 | 0.010958 | 0.120711 | -2.66674 |
| MSTRG.14112.1     | -1.13789 | 1.767704 | -3.75155 | 0.010977 | 0.120766 | -2.6686  |
| NONHSAT220467.1   | 1.248507 | 4.56741  | 3.751313 | 0.01098  | 0.120766 | -2.66888 |
| T046928           | 1.422454 | 4.948121 | 3.751109 | 0.010982 | 0.120766 | -2.66912 |
| lnc-EZR-2:1       | 1.565369 | 1.868131 | 3.750893 | 0.010985 | 0.120766 | -2.66937 |
| ENST00000660390.1 | 1.15332  | 2.128745 | 3.750792 | 0.010986 | 0.120766 | -2.66949 |
| NONHSAT223850.1   | 1.062556 | 7.280741 | 3.749883 | 0.010997 | 0.120766 | -2.67057 |
| NONHSAT161289.1   | 1.122128 | 5.423815 | 3.749815 | 0.010998 | 0.120766 | -2.67065 |
| NONHSAT201605.1   | 1.155262 | 1.790286 | 3.749577 | 0.011001 | 0.120776 | -2.67094 |
| MSTRG.44414.1     | -1.09168 | 5.358508 | -3.74932 | 0.011004 | 0.120776 | -2.67124 |
| lnc-KAT2B-8:1     | -1.07129 | 2.1736   | -3.74887 | 0.01101  | 0.120808 | -2.67178 |
| NONHSAT148263.1   | 1.174005 | 3.370703 | 3.747054 | 0.011032 | 0.120947 | -2.67393 |
| ENST00000454253.2 | 1.400472 | 9.376338 | 3.746148 | 0.011043 | 0.121016 | -2.675   |
| NONHSAT185309.1   | -1.10331 | 1.728009 | -3.74584 | 0.011047 | 0.121032 | -2.67537 |
| NONHSAT169982.1   | 1.766538 | 1.904222 | 3.745537 | 0.01105  | 0.121059 | -2.67573 |
| lnc-CRYM-6:1      | 1.407826 | 1.874861 | 3.744716 | 0.011061 | 0.121075 | -2.6767  |
| NONHSAT215948.1   | 1.316053 | 2.379033 | 3.744664 | 0.011061 | 0.121075 | -2.67676 |
| lnc-PRICKLE2-5:1  | -1.15007 | 4.403709 | -3.74462 | 0.011062 | 0.121075 | -2.67682 |
| NONHSAT193280.1   | -1.51682 | 2.046455 | -3.74445 | 0.011064 | 0.121075 | -2.67702 |
| NONHSAT205238.1   | 1.405395 | 2.726099 | 3.744349 | 0.011065 | 0.121075 | -2.67713 |
| NONHSAT152406.1   | 1.171741 | 1.932896 | 3.742739 | 0.011085 | 0.121226 | -2.67904 |
| MSTRG.52953.1     | 1.709671 | 2.623954 | 3.742535 | 0.011087 | 0.12124  | -2.67929 |
| lnc-TPT1-1:1      | -1.24542 | 4.700309 | -3.74089 | 0.011108 | 0.121396 | -2.68124 |
| ENST00000666763.1 | 1.512574 | 2.223393 | 3.740225 | 0.011116 | 0.121434 | -2.68203 |
| lnc-RAF1-1:1      | -1.14773 | 2.843847 | -3.73829 | 0.01114  | 0.121601 | -2.68433 |
| lnc-TOX3-3:1      | -1.08302 | 1.729663 | -3.73703 | 0.011156 | 0.121697 | -2.68582 |
| NONHSAT183293.1   | -1.41294 | 2.243711 | -3.73679 | 0.011159 | 0.121697 | -2.68611 |
| T157392           | -1.02242 | 5.721889 | -3.73675 | 0.011159 | 0.121697 | -2.68615 |
| NONHSAT189313.1   | -1.6578  | 2.659322 | -3.73671 | 0.01116  | 0.121697 | -2.6862  |
| NONHSAT189955.1   | 2.096375 | 2.691931 | 3.736002 | 0.011168 | 0.121756 | -2.68704 |
| MSTRG.3136.1      | 1.303839 | 1.820501 | 3.735743 | 0.011172 | 0.121771 | -2.68735 |
| NONHSAT154053.1   | -1.52037 | 3.046062 | -3.7357  | 0.011172 | 0.121771 | -2.68741 |
| ENST00000649401.1 | 1.427346 | 3.784698 | 3.735489 | 0.011175 | 0.121777 | -2.68765 |
| lnc-LAMA1-7:1     | 1.206021 | 1.803482 | 3.735174 | 0.011179 | 0.121777 | -2.68803 |
| MSTRG.10077.1     | -1.25304 | 2.926126 | -3.7335  | 0.0112   | 0.121882 | -2.69001 |
| lnc-OR4N4-1:6     | 1.242935 | 3.464541 | 3.732492 | 0.011212 | 0.12197  | -2.69121 |
| ENST00000584414.1 | 1.938888 | 4.024829 | 3.732324 | 0.011214 | 0.121976 | -2.69141 |
| NONHSAT163249.1   | 1.065841 | 4.020749 | 3.732059 | 0.011218 | 0.121976 | -2.69173 |
| lnc-GTSF1L-10:1   | 1.491467 | 1.793118 | 3.731356 | 0.011226 | 0.122026 | -2.69256 |
| NONHSAT157034.1   | -1.37266 | 2.848638 | -3.7313  | 0.011227 | 0.122026 | -2.69263 |

|                   |          |          |          |          |          |          |
|-------------------|----------|----------|----------|----------|----------|----------|
| MSTRG.17146.1     | 1.358199 | 2.096851 | 3.730354 | 0.011239 | 0.122118 | -2.69375 |
| NONHSAT221767.1   | 1.08155  | 5.296629 | 3.730045 | 0.011243 | 0.122134 | -2.69412 |
| NONHSAT194790.1   | 1.014523 | 1.560588 | 3.72935  | 0.011252 | 0.122199 | -2.69495 |
| lnc-SPNS2-4:1     | 2.034144 | 3.127172 | 3.729157 | 0.011254 | 0.1222   | -2.69518 |
| lnc-IRX5-4:1      | 1.503441 | 2.872675 | 3.727132 | 0.011279 | 0.122362 | -2.69758 |
| NONHSAT223804.1   | -1.06846 | 5.037385 | -3.72711 | 0.01128  | 0.122362 | -2.69762 |
| ENST00000659885.1 | -1.14066 | 3.535703 | -3.72649 | 0.011288 | 0.122379 | -2.69835 |
| NONHSAT148748.1   | 1.153413 | 2.56474  | 3.726487 | 0.011288 | 0.122379 | -2.69835 |
| T114088           | -1.08842 | 4.672918 | -3.7264  | 0.011289 | 0.122379 | -2.69846 |
| ENST00000582101.1 | 1.530813 | 3.929343 | 3.725128 | 0.011305 | 0.122455 | -2.69997 |
| NR_125936         | -1.5549  | 1.888406 | -3.72449 | 0.011313 | 0.122502 | -2.70073 |
| MSTRG.6619.1      | -1.35569 | 2.836624 | -3.7237  | 0.011323 | 0.122564 | -2.70167 |
| NONHSAT201110.1   | 1.03526  | 3.852792 | 3.723518 | 0.011325 | 0.122576 | -2.70188 |
| lnc-POFUT1-1:1    | 1.137948 | 4.350693 | 3.722832 | 0.011334 | 0.122604 | -2.7027  |
| lnc-NEK11-2:1     | -1.53387 | 2.25538  | -3.72262 | 0.011336 | 0.122604 | -2.70296 |
| NONHSAT168095.1   | -1.14117 | 2.174904 | -3.72195 | 0.011345 | 0.12266  | -2.70375 |
| MSTRG.58979.1     | 1.22818  | 3.91711  | 3.721675 | 0.011348 | 0.12267  | -2.70408 |
| lnc-PJK-2:4       | -1.28359 | 3.742485 | -3.71997 | 0.01137  | 0.122838 | -2.7061  |
| NONHSAT211160.1   | 1.681956 | 3.207835 | 3.719855 | 0.011371 | 0.122841 | -2.70624 |
| MSTRG.24918.1     | 1.527492 | 1.878688 | 3.719098 | 0.011381 | 0.122862 | -2.70714 |
| NONHSAT218424.1   | -1.18629 | 1.797596 | -3.7188  | 0.011385 | 0.122862 | -2.70749 |
| ENST00000518090.1 | -1.64135 | 2.93268  | -3.71831 | 0.011391 | 0.122862 | -2.70808 |
| NONHSAT178754.1   | 1.258594 | 3.362144 | 3.718207 | 0.011392 | 0.122862 | -2.7082  |
| MSTRG.21637.2     | 1.589903 | 6.093479 | 3.718126 | 0.011393 | 0.122862 | -2.7083  |
| ENST00000655507.1 | 1.001776 | 1.523682 | 3.718036 | 0.011395 | 0.122862 | -2.70841 |
| NONHSAT162883.1   | 1.887171 | 2.37905  | 3.718027 | 0.011395 | 0.122862 | -2.70842 |
| MSTRG.18125.1     | 1.8287   | 2.608988 | 3.717862 | 0.011397 | 0.122862 | -2.70862 |
| MSTRG.9301.2      | 1.210537 | 4.080408 | 3.717769 | 0.011398 | 0.122862 | -2.70873 |
| lnc-GAPVD1-1:4    | 1.133221 | 3.719886 | 3.717381 | 0.011403 | 0.122865 | -2.70919 |
| NONHSAT174329.1   | 1.456681 | 2.355063 | 3.717124 | 0.011406 | 0.122874 | -2.70949 |
| lnc-EMC2-1:1      | -1.39035 | 2.644747 | -3.71592 | 0.011422 | 0.123014 | -2.71093 |
| ENST00000658663.1 | 1.414283 | 3.201044 | 3.715679 | 0.011425 | 0.12302  | -2.71122 |
| lnc-PLET1-7:1     | 1.803864 | 5.333607 | 3.715299 | 0.01143  | 0.12302  | -2.71167 |
| ENST00000415477.1 | -1.34528 | 2.240614 | -3.71516 | 0.011431 | 0.123025 | -2.71183 |
| NONHSAT151593.1   | -1.22778 | 3.218562 | -3.71421 | 0.011443 | 0.12313  | -2.71296 |
| NONHSAT152574.1   | 1.457665 | 1.947784 | 3.713269 | 0.011455 | 0.123154 | -2.71409 |
| NONHSAT167897.1   | 1.956247 | 3.617491 | 3.712493 | 0.011465 | 0.12321  | -2.71501 |
| NONHSAT214995.1   | -1.1644  | 2.920016 | -3.71245 | 0.011466 | 0.12321  | -2.71506 |
| NONHSAT177084.1   | -1.27906 | 3.432756 | -3.71221 | 0.011469 | 0.12321  | -2.71534 |
| lnc-CA13-1:1      | -2.07301 | 2.858281 | -3.7116  | 0.011477 | 0.123228 | -2.71608 |
| LINC02201:13      | -1.07278 | 1.924126 | -3.7112  | 0.011482 | 0.123261 | -2.71655 |
| NONHSAT155354.1   | 1.508505 | 2.120579 | 3.710987 | 0.011485 | 0.123271 | -2.7168  |
| NONHSAT211225.1   | 1.272602 | 2.374183 | 3.710808 | 0.011487 | 0.123271 | -2.71702 |
| NONHSAT163940.1   | -1.14711 | 2.659119 | -3.71019 | 0.011495 | 0.123314 | -2.71775 |
| MSTRG.54768.1     | -1.5816  | 3.073121 | -3.70944 | 0.011505 | 0.123314 | -2.71865 |
| NONHSAT167655.1   | 2.291094 | 3.237174 | 3.709196 | 0.011508 | 0.123314 | -2.71894 |
| lnc-ERICH1-9:3    | -1.00343 | 5.064806 | -3.70902 | 0.01151  | 0.123314 | -2.71915 |
| lnc-UBP1-4:1      | -1.22959 | 3.79304  | -3.70901 | 0.01151  | 0.123314 | -2.71917 |

|                   |          |          |          |          |          |          |
|-------------------|----------|----------|----------|----------|----------|----------|
| MSTRG.53180.1     | -1.52117 | 2.479091 | -3.70849 | 0.011517 | 0.123333 | -2.71978 |
| NR_026674         | -1.66741 | 3.086697 | -3.70765 | 0.011528 | 0.123336 | -2.72079 |
| lnc-FANK1-4:4     | 1.031226 | 3.991969 | 3.707566 | 0.011529 | 0.123336 | -2.72088 |
| MSTRG.41652.30    | 1.570356 | 3.677083 | 3.707412 | 0.011531 | 0.123336 | -2.72107 |
| T046081           | -1.77467 | 2.97055  | -3.70669 | 0.01154  | 0.123397 | -2.72192 |
| NONHSAT223325.1   | 1.076998 | 4.018869 | 3.706079 | 0.011548 | 0.123427 | -2.72266 |
| MSTRG.10616.5     | 1.29571  | 4.828178 | 3.706068 | 0.011548 | 0.123427 | -2.72267 |
| lnc-SERPINI1-1:1  | -1.08748 | 2.301057 | -3.70572 | 0.011553 | 0.123437 | -2.72308 |
| lnc-PAX9-7:1      | 1.21889  | 1.638776 | 3.70571  | 0.011553 | 0.123437 | -2.7231  |
| lnc-ENTHD1-1:2    | 1.044741 | 1.748437 | 3.705395 | 0.011557 | 0.123458 | -2.72347 |
| lnc-FZD10-4:1     | 1.856965 | 2.383396 | 3.70516  | 0.01156  | 0.123458 | -2.72375 |
| NONHSAT173237.1   | 1.004126 | 1.631781 | 3.705135 | 0.01156  | 0.123458 | -2.72378 |
| NONHSAT169248.1   | 1.374016 | 3.779051 | 3.705087 | 0.011561 | 0.123458 | -2.72384 |
| lnc-C9orf50-1:2   | 1.951927 | 3.039252 | 3.704166 | 0.011573 | 0.123572 | -2.72494 |
| NONHSAT205818.1   | 1.031396 | 6.615751 | 3.704018 | 0.011575 | 0.123579 | -2.72511 |
| ENST00000643151.1 | 1.614168 | 3.994661 | 3.70296  | 0.011588 | 0.123634 | -2.72638 |
| NONHSAT211354.1   | 1.41127  | 2.101717 | 3.702421 | 0.011595 | 0.12367  | -2.72702 |
| ENST00000507398.1 | -1.4204  | 2.180785 | -3.69996 | 0.011627 | 0.123882 | -2.72996 |
| NONHSAT183623.1   | 1.84513  | 6.77996  | 3.699942 | 0.011628 | 0.123882 | -2.72998 |
| NONHSAT176709.1   | 1.011918 | 1.551471 | 3.698392 | 0.011648 | 0.124032 | -2.73183 |
| NONHSAT216550.1   | 1.450451 | 3.375082 | 3.697898 | 0.011654 | 0.124052 | -2.73242 |
| lnc-NRROS-1:1     | 1.263591 | 3.815827 | 3.697727 | 0.011656 | 0.124052 | -2.73262 |
| NONHSAT194018.1   | 2.121415 | 2.142185 | 3.697686 | 0.011657 | 0.124052 | -2.73267 |
| ENST00000507770.1 | -1.22673 | 3.650721 | -3.69723 | 0.011663 | 0.124089 | -2.73322 |
| MSTRG.8945.1      | 2.592529 | 3.658763 | 3.695348 | 0.011688 | 0.124248 | -2.73546 |
| ENST00000529314.2 | 1.206431 | 3.628641 | 3.695333 | 0.011688 | 0.124248 | -2.73548 |
| lnc-PATE2-1:1     | -1.41748 | 2.673467 | -3.6948  | 0.011695 | 0.124255 | -2.73612 |
| NONHSAT209010.1   | -1.03132 | 3.937941 | -3.69472 | 0.011696 | 0.124255 | -2.73621 |
| NONHSAT205755.1   | 1.526202 | 2.127539 | 3.694711 | 0.011696 | 0.124255 | -2.73622 |
| NONHSAT164668.1   | 1.053634 | 3.040213 | 3.694452 | 0.011699 | 0.124255 | -2.73653 |
| lnc-SNCG-1:1      | 1.068917 | 5.894202 | 3.694133 | 0.011704 | 0.124271 | -2.73691 |
| lnc-BCLAF3-1:1    | 1.580288 | 3.079055 | 3.693673 | 0.01171  | 0.124296 | -2.73746 |
| lnc-MAGIX-1:2     | -1.28324 | 2.816336 | -3.69311 | 0.011717 | 0.124311 | -2.73813 |
| NONHSAT215339.1   | 1.179343 | 1.824158 | 3.691138 | 0.011743 | 0.12448  | -2.74049 |
| NONHSAT172294.1   | 1.371645 | 1.786125 | 3.691135 | 0.011743 | 0.12448  | -2.74049 |
| NONHSAT206059.1   | 1.238595 | 2.033881 | 3.690673 | 0.011749 | 0.124518 | -2.74105 |
| NONHSAT167612.1   | 1.412341 | 2.22669  | 3.690567 | 0.01175  | 0.12452  | -2.74117 |
| lnc-ACSM6-1:1     | -1.88932 | 3.490165 | -3.69003 | 0.011758 | 0.124561 | -2.74182 |
| lnc-APIP-3:1      | 1.528537 | 3.966174 | 3.689825 | 0.01176  | 0.124561 | -2.74206 |
| NONHSAT221794.1   | 1.66572  | 1.948248 | 3.689684 | 0.011762 | 0.124561 | -2.74223 |
| ENST00000661961.1 | 1.054687 | 8.181689 | 3.68938  | 0.011766 | 0.124561 | -2.74259 |
| NONHSAT167741.1   | 1.377242 | 3.183677 | 3.689087 | 0.01177  | 0.124561 | -2.74294 |
| lnc-LMBRD1-6:1    | 1.092886 | 3.444836 | 3.68903  | 0.011771 | 0.124561 | -2.74301 |
| NONHSAT151820.1   | 1.355968 | 4.581178 | 3.688512 | 0.011778 | 0.124598 | -2.74363 |
| ENST00000411978.1 | 1.715878 | 1.936899 | 3.688223 | 0.011781 | 0.124599 | -2.74397 |
| MSTRG.54566.35    | -1.12206 | 1.660017 | -3.68793 | 0.011785 | 0.124613 | -2.74432 |
| NONHSAT203342.1   | 1.07477  | 3.329612 | 3.686483 | 0.011804 | 0.124699 | -2.74605 |
| NONHSAT170093.1   | 2.731865 | 3.476717 | 3.686177 | 0.011808 | 0.124715 | -2.74642 |

|                   |          |          |          |          |          |          |
|-------------------|----------|----------|----------|----------|----------|----------|
| lnc-SCUBE3-2:1    | -1.32998 | 2.00943  | -3.68608 | 0.01181  | 0.124716 | -2.74654 |
| MSTRG.9325.1      | 1.693886 | 2.375554 | 3.684524 | 0.01183  | 0.124856 | -2.7484  |
| NONHSAT196309.1   | -1.17654 | 5.280597 | -3.68351 | 0.011844 | 0.124942 | -2.74962 |
| T074212           | 1.375315 | 2.190456 | 3.682106 | 0.011863 | 0.125027 | -2.75129 |
| ENST00000418598.1 | -1.21293 | 3.5645   | -3.68128 | 0.011874 | 0.125092 | -2.75227 |
| NONHSAT224516.1   | -1.12803 | 3.154153 | -3.68045 | 0.011885 | 0.125139 | -2.75327 |
| ENST00000657842.1 | -1.50074 | 2.517411 | -3.68036 | 0.011886 | 0.125139 | -2.75338 |
| NONHSAT211360.1   | 1.085221 | 4.816261 | 3.679476 | 0.011898 | 0.125238 | -2.75444 |
| lnc-TAT-6:1       | 1.633967 | 2.794539 | 3.677411 | 0.011925 | 0.125396 | -2.75691 |
| ENST00000566529.1 | 1.206206 | 2.178659 | 3.677327 | 0.011926 | 0.125396 | -2.75701 |
| lnc-ASB4-1:2      | -1.65432 | 2.239495 | -3.67646 | 0.011938 | 0.125421 | -2.75805 |
| lnc-TLE4-12:4     | 1.128807 | 3.151275 | 3.675394 | 0.011952 | 0.125486 | -2.75932 |
| NONHSAT221562.1   | 1.432393 | 2.239301 | 3.675197 | 0.011955 | 0.125488 | -2.75956 |
| lnc-ZNF219-1:1    | 2.235858 | 2.537212 | 3.674844 | 0.01196  | 0.125498 | -2.75998 |
| lnc-GK-8:1        | 1.457792 | 2.521821 | 3.674128 | 0.011969 | 0.125521 | -2.76084 |
| T272852           | 1.545612 | 2.205083 | 3.67373  | 0.011975 | 0.125544 | -2.76132 |
| MSTRG.45379.7     | -1.74892 | 2.229646 | -3.67369 | 0.011975 | 0.125544 | -2.76137 |
| MSTRG.45107.23    | 1.598424 | 3.348462 | 3.672316 | 0.011994 | 0.125594 | -2.76301 |
| ENST00000451230.1 | -1.33451 | 1.82866  | -3.67152 | 0.012004 | 0.125627 | -2.76396 |
| NONHSAT210258.1   | -1.26651 | 1.747399 | -3.67066 | 0.012016 | 0.125671 | -2.76499 |
| NONHSAT154716.1   | 1.674118 | 2.6572   | 3.669764 | 0.012028 | 0.125727 | -2.76607 |
| lnc-CDH9-7:1      | 1.793957 | 2.520238 | 3.66922  | 0.012036 | 0.125748 | -2.76672 |
| NONHSAT187821.1   | -1.0102  | 1.87778  | -3.66919 | 0.012036 | 0.125748 | -2.76675 |
| lnc-KRTAP5-7-1:2  | -1.01424 | 6.067044 | -3.66835 | 0.012047 | 0.125816 | -2.76776 |
| NONHSAT159221.1   | 1.122552 | 6.591473 | 3.667393 | 0.01206  | 0.125886 | -2.76891 |
| NONHSAT178573.1   | -1.39969 | 2.788374 | -3.66663 | 0.012071 | 0.125947 | -2.76982 |
| ENST00000417794.1 | 1.431662 | 1.935973 | 3.666597 | 0.012071 | 0.125947 | -2.76986 |
| NONHSAT210892.1   | 1.058733 | 3.82681  | 3.666443 | 0.012073 | 0.125956 | -2.77005 |
| PKIA-AS1:4        | 1.737235 | 2.498787 | 3.66595  | 0.01208  | 0.126    | -2.77064 |
| lnc-ZNF675-4:1    | -2.18781 | 3.977852 | -3.66556 | 0.012085 | 0.126028 | -2.77111 |
| NONHSAT207831.1   | 1.117816 | 7.588087 | 3.665472 | 0.012086 | 0.126028 | -2.77121 |
| MSTRG.51522.1     | -1.20401 | 5.421498 | -3.66516 | 0.012091 | 0.126033 | -2.77158 |
| lnc-FZR1-4:1      | -1.32725 | 3.870364 | -3.66482 | 0.012095 | 0.126042 | -2.77199 |
| lnc-PHF20L1-8:1   | -1.24812 | 5.296508 | -3.66442 | 0.012101 | 0.126073 | -2.77247 |
| ENST00000566143.2 | -1.15946 | 3.035692 | -3.66405 | 0.012106 | 0.126074 | -2.77292 |
| MSTRG.13610.1     | 1.316118 | 2.247235 | 3.663589 | 0.012112 | 0.126119 | -2.77347 |
| lnc-SH3BGR-5:1    | 1.598368 | 2.304079 | 3.662531 | 0.012127 | 0.126185 | -2.77474 |
| lnc-ACP4-1:2      | 2.188586 | 2.910339 | 3.662488 | 0.012127 | 0.126185 | -2.77479 |
| MSTRG.2262.27     | 1.035848 | 1.536765 | 3.662369 | 0.012129 | 0.126185 | -2.77493 |
| T152001           | 1.441749 | 1.783292 | 3.662307 | 0.01213  | 0.126185 | -2.77501 |
| NONHSAT204910.1   | -1.08194 | 2.164768 | -3.66117 | 0.012145 | 0.126209 | -2.77637 |
| lnc-RBM45-9:1     | 1.219816 | 1.908322 | 3.661067 | 0.012147 | 0.126211 | -2.7765  |
| lnc-NTSR2-6:1     | 1.116792 | 4.986455 | 3.660889 | 0.012149 | 0.126223 | -2.77671 |
| MSTRG.45376.1     | 1.369596 | 6.003358 | 3.660502 | 0.012154 | 0.126243 | -2.77717 |
| NONHSAT151481.1   | -1.54263 | 3.223697 | -3.65928 | 0.012171 | 0.126288 | -2.77864 |
| ENST00000651074.1 | 1.473951 | 5.890637 | 3.659223 | 0.012172 | 0.126288 | -2.77871 |
| NONHSAT195860.1   | 1.075046 | 1.999788 | 3.659074 | 0.012174 | 0.126288 | -2.77889 |
| NONHSAT214840.1   | 1.398747 | 3.574299 | 3.659031 | 0.012174 | 0.126288 | -2.77894 |

|                   |          |          |          |          |          |          |
|-------------------|----------|----------|----------|----------|----------|----------|
| ZBED3-AS1:53      | 1.446402 | 4.137789 | 3.658597 | 0.01218  | 0.126319 | -2.77946 |
| lnc-SSH1-2:1      | 1.25445  | 4.429854 | 3.658572 | 0.012181 | 0.126319 | -2.77949 |
| lnc-NT5C2-2:1     | 1.709095 | 2.364853 | 3.657591 | 0.012194 | 0.126406 | -2.78067 |
| lnc-NOVA1-3:1     | -1.06248 | 2.083561 | -3.65641 | 0.01221  | 0.126474 | -2.78208 |
| lnc-SMG6-8:1      | 1.547433 | 2.825855 | 3.653991 | 0.012244 | 0.126608 | -2.78499 |
| MSTRG.34744.1     | -1.60472 | 2.927634 | -3.65316 | 0.012255 | 0.126646 | -2.78599 |
| ENST00000605836.1 | -1.1669  | 4.846786 | -3.65309 | 0.012256 | 0.126646 | -2.78608 |
| lnc-WRNIP1-4:2    | 1.17284  | 1.6592   | 3.651479 | 0.012279 | 0.126723 | -2.78801 |
| lnc-AHR-1:12      | -1.18991 | 2.04097  | -3.65146 | 0.012279 | 0.126723 | -2.78803 |
| lnc-MPLKIP-8:1    | 2.133753 | 4.044595 | 3.650374 | 0.012294 | 0.126827 | -2.78933 |
| lnc-PAX5-7:1      | -1.79708 | 4.112182 | -3.64879 | 0.012316 | 0.126955 | -2.79124 |
| NONHSAT221898.1   | -1.67388 | 3.782362 | -3.64838 | 0.012322 | 0.126955 | -2.79173 |
| lnc-AMZ1-7:1      | -1.45788 | 5.199788 | -3.64836 | 0.012322 | 0.126955 | -2.79176 |
| NONHSAT205824.1   | 1.416376 | 4.651629 | 3.648019 | 0.012327 | 0.126955 | -2.79216 |
| NONHSAT176720.1   | 1.070504 | 1.566727 | 3.64797  | 0.012327 | 0.126955 | -2.79222 |
| lnc-SEMA5A-10:1   | -1.11186 | 2.127171 | -3.647   | 0.012341 | 0.127024 | -2.79339 |
| ENST00000514187.1 | -1.19992 | 2.329013 | -3.64658 | 0.012347 | 0.127071 | -2.79389 |
| lnc-RPP25L-1:2    | -1.44186 | 3.591001 | -3.64647 | 0.012348 | 0.127074 | -2.79402 |
| ENST00000657992.1 | -1.19095 | 4.250785 | -3.64606 | 0.012354 | 0.127081 | -2.79452 |
| NR_102268         | 1.199545 | 2.90057  | 3.645659 | 0.012359 | 0.127088 | -2.795   |
| ENST00000669000.1 | -1.41767 | 4.001646 | -3.64553 | 0.012361 | 0.127088 | -2.79515 |
| NONHSAT195901.1   | -1.12832 | 1.779865 | -3.64531 | 0.012364 | 0.127088 | -2.79542 |
| NONHSAT201252.1   | -1.01838 | 4.020338 | -3.64513 | 0.012367 | 0.127097 | -2.79563 |
| ENST00000538041.1 | 1.402543 | 1.874253 | 3.644668 | 0.012373 | 0.127099 | -2.79619 |
| lnc-ZC3H12D-13:1  | 1.171159 | 1.686669 | 3.644373 | 0.012377 | 0.127129 | -2.79655 |
| ENST00000606279.1 | -1.25164 | 2.977508 | -3.64274 | 0.0124   | 0.127261 | -2.79851 |
| T009860           | 1.74848  | 2.506322 | 3.641595 | 0.012416 | 0.127381 | -2.79989 |
| ENST00000563991.1 | 1.331946 | 3.370165 | 3.641341 | 0.01242  | 0.127392 | -2.80019 |
| lnc-TRIB1-9:1     | 1.661968 | 3.51277  | 3.640526 | 0.012431 | 0.127416 | -2.80117 |
| lnc-CYB561D2-2:1  | -1.19502 | 2.533    | -3.64052 | 0.012431 | 0.127416 | -2.80118 |
| T090882           | -1.26767 | 2.229856 | -3.6384  | 0.012461 | 0.127574 | -2.80374 |
| MSTRG.71226.1     | 2.153012 | 2.914192 | 3.637659 | 0.012472 | 0.127639 | -2.80462 |
| lnc-MLN-2:1       | -1.33375 | 1.981303 | -3.63711 | 0.012479 | 0.127642 | -2.80528 |
| NONHSAT160720.1   | -1.31429 | 4.491453 | -3.63618 | 0.012492 | 0.127712 | -2.8064  |
| ENST00000563289.1 | 1.646355 | 2.447669 | 3.63597  | 0.012495 | 0.127729 | -2.80666 |
| NONHSAT202484.1   | 1.628927 | 2.4647   | 3.635506 | 0.012502 | 0.127757 | -2.80721 |
| lnc-FAM25C-2:1    | 1.08851  | 4.876423 | 3.635193 | 0.012506 | 0.12779  | -2.80759 |
| NONHSAT158373.1   | -1.09031 | 3.173392 | -3.63471 | 0.012513 | 0.127808 | -2.80818 |
| lnc-WFDC9-1:1     | -1.30392 | 3.520338 | -3.6332  | 0.012535 | 0.127961 | -2.80999 |
| MSTRG.24499.1     | -1.60315 | 2.802384 | -3.63307 | 0.012536 | 0.127967 | -2.81014 |
| lnc-MBOAT1-2:26   | 1.910086 | 2.92013  | 3.632347 | 0.012547 | 0.128009 | -2.81102 |
| NONHSAT186514.1   | -1.36511 | 3.165092 | -3.63233 | 0.012547 | 0.128009 | -2.81103 |
| NONHSAT201175.1   | 1.611258 | 2.329471 | 3.631874 | 0.012553 | 0.128049 | -2.81159 |
| MSTRG.29324.1     | 1.37079  | 3.692147 | 3.630168 | 0.012578 | 0.128162 | -2.81364 |
| NONHSAT192352.1   | 1.077053 | 4.274083 | 3.630115 | 0.012578 | 0.128162 | -2.81371 |
| lnc-CYSLTR2-2:2   | 1.33776  | 3.833624 | 3.629712 | 0.012584 | 0.128192 | -2.81419 |
| lnc-PABPC4L-6:2   | 1.134504 | 4.492341 | 3.628728 | 0.012598 | 0.128235 | -2.81538 |
| ENST00000502284.1 | -1.37734 | 4.651822 | -3.62802 | 0.012608 | 0.128297 | -2.81623 |

|                   |          |          |          |          |          |          |
|-------------------|----------|----------|----------|----------|----------|----------|
| lnc-ARHGAP21-4:1  | 1.824657 | 2.316399 | 3.627515 | 0.012615 | 0.128332 | -2.81684 |
| NONHSAT158919.1   | 1.424776 | 2.760186 | 3.62611  | 0.012635 | 0.128438 | -2.81853 |
| NONHSAT206175.1   | 1.391388 | 2.022096 | 3.625211 | 0.012648 | 0.128463 | -2.81962 |
| MSTRG.45328.1     | 1.10319  | 5.078577 | 3.62506  | 0.012651 | 0.128463 | -2.8198  |
| MSTRG.67188.1     | 1.222344 | 5.3708   | 3.624847 | 0.012654 | 0.128474 | -2.82006 |
| lnc-OCA2-8:1      | -1.04967 | 4.185995 | -3.62425 | 0.012662 | 0.128521 | -2.82077 |
| lnc-PTPRR-3:2     | -1.19665 | 5.101039 | -3.62413 | 0.012664 | 0.128526 | -2.82092 |
| LINC01804:7       | 1.047825 | 2.709576 | 3.623851 | 0.012668 | 0.128554 | -2.82126 |
| MSTRG.8236.1      | -1.16307 | 3.481213 | -3.62341 | 0.012674 | 0.128558 | -2.82178 |
| NONHSAT164498.1   | 1.131895 | 3.756361 | 3.623375 | 0.012675 | 0.128558 | -2.82183 |
| NONHSAT188130.1   | 1.828563 | 3.599289 | 3.623175 | 0.012678 | 0.128575 | -2.82207 |
| lnc-RFC3-7:2      | -1.59823 | 2.52607  | -3.62233 | 0.01269  | 0.128627 | -2.82309 |
| NONHSAT206999.1   | -1.39108 | 3.267164 | -3.62193 | 0.012695 | 0.128627 | -2.82357 |
| NONHSAT164427.1   | 1.412925 | 2.160199 | 3.621304 | 0.012704 | 0.128665 | -2.82433 |
| ENST00000661767.1 | -1.27728 | 3.699814 | -3.62121 | 0.012706 | 0.128665 | -2.82444 |
| ENST00000420389.1 | 1.061853 | 2.453687 | 3.621071 | 0.012708 | 0.128665 | -2.82461 |
| NONHSAT219481.1   | -1.0756  | 3.187599 | -3.62093 | 0.01271  | 0.128665 | -2.82478 |
| lnc-HSPG2-3:1     | -1.32238 | 4.180943 | -3.62076 | 0.012712 | 0.128665 | -2.82498 |
| ENST00000575772.1 | -1.11824 | 3.357442 | -3.62067 | 0.012713 | 0.128665 | -2.82509 |
| ENST00000659449.1 | -1.4993  | 3.177732 | -3.62064 | 0.012714 | 0.128665 | -2.82513 |
| lnc-DPH3-3:1      | -1.44795 | 2.638228 | -3.62055 | 0.012715 | 0.128665 | -2.82523 |
| ENST00000450681.1 | 1.916013 | 2.668192 | 3.62018  | 0.012721 | 0.128675 | -2.82568 |
| ENST00000669105.1 | -1.40113 | 3.447383 | -3.61885 | 0.01274  | 0.128775 | -2.82729 |
| NONHSAT180279.1   | -1.56594 | 2.837838 | -3.6188  | 0.01274  | 0.128775 | -2.82735 |
| NONHSAT177657.1   | 1.473703 | 2.10023  | 3.617392 | 0.012761 | 0.128873 | -2.82905 |
| lnc-SPRTN-3:1     | 1.00847  | 3.907893 | 3.617159 | 0.012764 | 0.128873 | -2.82933 |
| lnc-THBS1-3:1     | 1.002048 | 5.759424 | 3.617142 | 0.012764 | 0.128873 | -2.82935 |
| MSTRG.55923.1     | 1.017477 | 7.274848 | 3.616278 | 0.012777 | 0.128883 | -2.83039 |
| ZNF337-AS1:17     | -1.04564 | 3.181883 | -3.61588 | 0.012783 | 0.128929 | -2.83088 |
| lnc-ELN-4:4       | 1.348641 | 2.306185 | 3.615498 | 0.012788 | 0.128955 | -2.83133 |
| ENST00000438738.1 | 1.523206 | 2.68214  | 3.615341 | 0.012791 | 0.128955 | -2.83152 |
| NONHSAT214867.1   | 1.337925 | 2.483221 | 3.615084 | 0.012794 | 0.128959 | -2.83183 |
| NONHSAT190400.1   | 1.398197 | 2.670164 | 3.61505  | 0.012795 | 0.128959 | -2.83187 |
| lnc-RACGAP1-1:13  | -1.95988 | 3.738007 | -3.61397 | 0.01281  | 0.129079 | -2.83318 |
| lnc-PDE9A-2:1     | 1.253509 | 1.844821 | 3.613348 | 0.012819 | 0.129106 | -2.83393 |
| NONHSAT178510.1   | -1.16837 | 2.594526 | -3.61284 | 0.012827 | 0.129129 | -2.83455 |
| NONHSAT224078.1   | -1.49939 | 2.068936 | -3.61271 | 0.012829 | 0.129133 | -2.83469 |
| lnc-ZCCHC17-7:2   | -1.43516 | 3.142413 | -3.61214 | 0.012837 | 0.129133 | -2.83539 |
| lnc-INTS8-3:1     | -1.52748 | 2.760099 | -3.61058 | 0.01286  | 0.129265 | -2.83727 |
| ENST00000661222.1 | 1.970759 | 3.237531 | 3.610122 | 0.012866 | 0.129294 | -2.83782 |
| NONHSAT167071.1   | -1.13323 | 2.279615 | -3.60988 | 0.01287  | 0.129295 | -2.83811 |
| NONHSAT153535.1   | 1.023055 | 5.77638  | 3.608031 | 0.012897 | 0.12942  | -2.84035 |
| NONHSAT206290.1   | 1.937439 | 3.018928 | 3.607913 | 0.012899 | 0.129425 | -2.84049 |
| NONHSAT150233.1   | 1.050993 | 3.054259 | 3.60589  | 0.012928 | 0.129653 | -2.84294 |
| NONHSAT167814.1   | 1.087407 | 1.595929 | 3.605834 | 0.012929 | 0.129653 | -2.84301 |
| lnc-NDST3-10:1    | -1.27943 | 2.201377 | -3.60538 | 0.012936 | 0.129694 | -2.84355 |
| MSTRG.21178.1     | 1.696509 | 2.608899 | 3.605095 | 0.01294  | 0.12971  | -2.8439  |
| NONHSAT186571.1   | 1.089243 | 4.139881 | 3.604062 | 0.012955 | 0.12985  | -2.84515 |



|                   |          |          |          |          |          |          |
|-------------------|----------|----------|----------|----------|----------|----------|
| lnc-ATXN7-12:1    | -1.20612 | 5.173007 | -3.60293 | 0.012972 | 0.129909 | -2.84651 |
| ENST00000657311.1 | 1.588074 | 2.320336 | 3.602239 | 0.012982 | 0.129964 | -2.84735 |
| lnc-RAB35-2:1     | -1.07512 | 5.611366 | -3.60152 | 0.012993 | 0.130026 | -2.84822 |
| ENST00000414377.1 | -1.48771 | 4.572715 | -3.60146 | 0.012993 | 0.130026 | -2.84829 |
| ENST00000426870.1 | 1.216932 | 1.668174 | 3.601327 | 0.012996 | 0.130034 | -2.84845 |
| NONHSAT158161.1   | -1.36408 | 4.066079 | -3.60115 | 0.012998 | 0.130034 | -2.84867 |
| NONHSAT194522.1   | 1.233025 | 3.896881 | 3.600862 | 0.013002 | 0.13006  | -2.84902 |
| ENST00000509191.5 | 1.002447 | 7.995928 | 3.600188 | 0.013012 | 0.130065 | -2.84983 |
| MSTRG.66471.4     | -1.24473 | 4.468843 | -3.59982 | 0.013018 | 0.130065 | -2.85027 |
| lnc-ITGA11-3:1    | -1.53115 | 2.205999 | -3.5998  | 0.013018 | 0.130065 | -2.8503  |
| lnc-PFKP-16:13    | 1.448722 | 2.636434 | 3.599635 | 0.01302  | 0.130077 | -2.8505  |
| NONHSAT214001.1   | 1.048269 | 3.625835 | 3.598512 | 0.013037 | 0.130179 | -2.85186 |
| NONHSAT202344.1   | -1.03622 | 2.174006 | -3.59829 | 0.01304  | 0.130199 | -2.85213 |
| lnc-NBAS-14:2     | 1.218059 | 5.466926 | 3.597807 | 0.013048 | 0.130227 | -2.85271 |
| ENST00000657583.1 | -1.04962 | 5.160046 | -3.59773 | 0.013049 | 0.130227 | -2.8528  |
| ENST00000502766.2 | 1.625546 | 1.838377 | 3.59749  | 0.013052 | 0.130227 | -2.85309 |
| NONHSAT186946.1   | 1.494677 | 2.587465 | 3.597381 | 0.013054 | 0.130227 | -2.85323 |
| lnc-PHTF2-4:2     | 1.2098   | 3.605044 | 3.5973   | 0.013055 | 0.130227 | -2.85332 |
| lnc-ERICH4-1:1    | -2.15278 | 4.432514 | -3.597   | 0.01306  | 0.130248 | -2.85369 |
| NONHSAT213858.1   | 1.947385 | 2.028409 | 3.596812 | 0.013062 | 0.130251 | -2.85391 |
| MSTRG.66393.12    | -1.21898 | 2.719955 | -3.59681 | 0.013062 | 0.130251 | -2.85392 |
| lnc-PTTG1-6:1     | 1.298986 | 3.81405  | 3.595741 | 0.013078 | 0.130357 | -2.85521 |
| ENST00000448412.2 | -1.25401 | 2.515565 | -3.59306 | 0.013118 | 0.130523 | -2.85845 |
| NONHSAT170606.1   | -1.01417 | 4.695008 | -3.59306 | 0.013118 | 0.130523 | -2.85846 |
| ENST00000646143.2 | 2.609741 | 5.62448  | 3.592725 | 0.013123 | 0.130546 | -2.85886 |
| lnc-RARS2-2:1     | -1.01172 | 5.22259  | -3.59211 | 0.013132 | 0.130599 | -2.8596  |
| MSTRG.55327.1     | -1.91088 | 2.591451 | -3.59174 | 0.013138 | 0.130611 | -2.86005 |
| MSTRG.42207.1     | 1.962053 | 3.210935 | 3.591518 | 0.013141 | 0.130611 | -2.86032 |
| NONHSAT164812.1   | -1.41373 | 2.491956 | -3.59151 | 0.013141 | 0.130611 | -2.86033 |
| MSTRG.40783.1     | 1.378863 | 6.335708 | 3.590331 | 0.013159 | 0.130744 | -2.86176 |
| lnc-TFAM-7:1      | 1.098046 | 2.992863 | 3.589633 | 0.013169 | 0.130761 | -2.8626  |
| lnc-PRDX1-2:1     | -1.13678 | 3.916954 | -3.58901 | 0.013179 | 0.130828 | -2.86336 |
| NR_026946         | 1.688637 | 3.108661 | 3.588886 | 0.013181 | 0.130834 | -2.86351 |
| NONHSAT185900.1   | -1.02031 | 3.515265 | -3.58768 | 0.013199 | 0.130948 | -2.86497 |
| lnc-BRF1-28:1     | 1.381873 | 2.178075 | 3.586992 | 0.013209 | 0.131013 | -2.8658  |
| NONHSAT156564.1   | -1.1423  | 3.902163 | -3.58638 | 0.013218 | 0.131087 | -2.86655 |
| ENST00000527443.1 | 1.106323 | 2.890626 | 3.586096 | 0.013222 | 0.131095 | -2.86689 |
| lnc-ZNF680-29:1   | -1.52144 | 2.722668 | -3.58591 | 0.013225 | 0.131097 | -2.86712 |
| ENST00000512036.1 | 1.544083 | 2.701671 | 3.585672 | 0.013229 | 0.131106 | -2.8674  |
| ENST00000653641.1 | 1.262451 | 1.781959 | 3.585482 | 0.013232 | 0.131111 | -2.86763 |
| lnc-ZDHHC17-11:1  | 1.284868 | 1.751503 | 3.585212 | 0.013236 | 0.131111 | -2.86796 |
| ENST00000526566.2 | 1.257468 | 5.303214 | 3.583292 | 0.013265 | 0.131243 | -2.87029 |
| ENST00000419944.1 | 2.265182 | 2.617422 | 3.582817 | 0.013272 | 0.131279 | -2.87086 |
| NONHSAT210717.1   | 1.657117 | 2.657849 | 3.582474 | 0.013277 | 0.131301 | -2.87128 |
| MSTRG.48102.1     | 1.366094 | 2.231766 | 3.581947 | 0.013285 | 0.131325 | -2.87192 |
| NONHSAT188466.1   | 1.518766 | 6.98453  | 3.581883 | 0.013286 | 0.131325 | -2.872   |
| NONHSAT215382.1   | -1.95635 | 3.250955 | -3.58103 | 0.013299 | 0.131348 | -2.87303 |
| T043258           | 1.154847 | 3.158741 | 3.580952 | 0.0133   | 0.131348 | -2.87312 |

|                   |          |          |          |          |          |          |
|-------------------|----------|----------|----------|----------|----------|----------|
| NR_125837         | 1.07534  | 3.967603 | 3.580705 | 0.013304 | 0.131359 | -2.87342 |
| MSTRG.44118.2     | 1.122739 | 2.574192 | 3.580459 | 0.013308 | 0.131383 | -2.87372 |
| T356962           | 1.281436 | 1.686663 | 3.58019  | 0.013312 | 0.131386 | -2.87405 |
| lnc-TM9SF2-6:1    | -1.14482 | 2.476366 | -3.57975 | 0.013318 | 0.131399 | -2.87458 |
| NONHSAT154528.1   | -1.09341 | 2.508046 | -3.57868 | 0.013335 | 0.131546 | -2.87588 |
| NONHSAT206423.1   | 1.204971 | 2.110953 | 3.578491 | 0.013337 | 0.131546 | -2.87611 |
| MSTRG.56189.1     | 1.11953  | 4.422009 | 3.578375 | 0.013339 | 0.131546 | -2.87625 |
| ENST00000577621.1 | -1.24847 | 3.011789 | -3.57833 | 0.01334  | 0.131546 | -2.8763  |
| ENST00000505575.1 | 1.425806 | 6.295781 | 3.577997 | 0.013345 | 0.131563 | -2.87671 |
| ENST00000609839.1 | 1.07938  | 3.076878 | 3.577799 | 0.013348 | 0.131563 | -2.87695 |
| NONHSAT163917.1   | -1.57615 | 2.180561 | -3.57768 | 0.01335  | 0.131568 | -2.8771  |
| NONHSAT214004.1   | -1.56649 | 2.938803 | -3.57745 | 0.013353 | 0.131576 | -2.87737 |
| NR_047476         | 1.467699 | 5.397888 | 3.577197 | 0.013357 | 0.131589 | -2.87768 |
| lnc-CREB1-9:1     | 1.359471 | 5.37578  | 3.576969 | 0.013361 | 0.131606 | -2.87795 |
| lnc-CLDND1-2:1    | -1.26865 | 2.769059 | -3.57669 | 0.013365 | 0.131626 | -2.87829 |
| NONHSAT198406.1   | -1.42162 | 2.892934 | -3.57632 | 0.01337  | 0.131657 | -2.87874 |
| lnc-TUBA3C-19:1   | 1.197067 | 6.612237 | 3.575957 | 0.013376 | 0.131668 | -2.87918 |
| lnc-JPH3-3:15     | 2.182016 | 2.620035 | 3.575258 | 0.013387 | 0.131712 | -2.88003 |
| MSTRG.889.1       | 1.25004  | 2.25748  | 3.575168 | 0.013388 | 0.131713 | -2.88014 |
| NONHSAT164756.1   | 1.573394 | 3.950629 | 3.57461  | 0.013397 | 0.131735 | -2.88082 |
| lnc-L3MBTL4-3:1   | 1.191018 | 7.794674 | 3.574517 | 0.013398 | 0.131735 | -2.88093 |
| LINC00960:14      | -1.15676 | 2.891512 | -3.57418 | 0.013403 | 0.131742 | -2.88134 |
| MSTRG.27797.5     | 1.767603 | 2.725038 | 3.573735 | 0.01341  | 0.131742 | -2.88188 |
| ENST00000655017.1 | 1.565983 | 2.967106 | 3.57286  | 0.013423 | 0.131814 | -2.88294 |
| NONHSAT167882.1   | -1.06461 | 3.37543  | -3.5682  | 0.013495 | 0.132171 | -2.8886  |
| MSTRG.45522.1     | 2.392088 | 5.709855 | 3.567751 | 0.013502 | 0.132187 | -2.88914 |
| NONHSAT180875.1   | 1.212447 | 3.801964 | 3.566627 | 0.013519 | 0.13226  | -2.89051 |
| ENST00000624818.1 | -1.24236 | 2.229769 | -3.56659 | 0.01352  | 0.13226  | -2.89056 |
| ENST00000504409.3 | 1.334171 | 2.732402 | 3.566154 | 0.013526 | 0.132312 | -2.89108 |
| MSTRG.72479.1     | 1.455738 | 3.610804 | 3.565484 | 0.013537 | 0.13233  | -2.8919  |
| NONHSAT215205.1   | 2.043182 | 2.806302 | 3.565271 | 0.01354  | 0.13233  | -2.89216 |
| ENST00000668117.1 | 1.466573 | 3.378481 | 3.564583 | 0.013551 | 0.132408 | -2.89299 |
| lnc-FBXL3-2:1     | -1.33847 | 4.422572 | -3.56336 | 0.01357  | 0.132479 | -2.89448 |
| lnc-ABCD3-9:1     | -1.05711 | 4.699846 | -3.56326 | 0.013571 | 0.13248  | -2.8946  |
| NONHSAT173142.1   | -1.70371 | 2.607835 | -3.56314 | 0.013573 | 0.132485 | -2.89474 |
| lnc-P4HA3-2:1     | -1.60687 | 3.132644 | -3.56183 | 0.013593 | 0.132579 | -2.89633 |
| lnc-HS3ST3B1-9:2  | 1.125091 | 3.550208 | 3.561759 | 0.013594 | 0.132579 | -2.89642 |
| MSTRG.840.1       | 1.433075 | 2.162894 | 3.561445 | 0.013599 | 0.132583 | -2.89681 |
| MSTRG.23099.1     | 1.479326 | 4.369088 | 3.56114  | 0.013604 | 0.132583 | -2.89718 |
| MSTRG.63581.1     | 1.403271 | 4.085917 | 3.560934 | 0.013607 | 0.132583 | -2.89743 |
| lnc-TMEM206-4:1   | 1.471337 | 2.31716  | 3.560822 | 0.013609 | 0.132583 | -2.89756 |
| MSTRG.10862.1     | 1.155687 | 1.855483 | 3.560706 | 0.013611 | 0.132583 | -2.8977  |
| NONHSAT164565.1   | 1.088411 | 1.571471 | 3.560631 | 0.013612 | 0.132583 | -2.8978  |
| NONHSAT165160.1   | 1.36721  | 1.728834 | 3.560487 | 0.013614 | 0.132592 | -2.89797 |
| NONHSAT181568.1   | 1.425806 | 5.101137 | 3.56023  | 0.013618 | 0.132605 | -2.89828 |
| NONHSAT199573.1   | 1.677145 | 2.8351   | 3.559073 | 0.013636 | 0.132649 | -2.89969 |
| ENST00000660929.1 | -1.23962 | 1.953872 | -3.559   | 0.013637 | 0.132649 | -2.89978 |
| NONHSAT218083.1   | 2.205438 | 3.003021 | 3.558751 | 0.013641 | 0.132663 | -2.90008 |

|                   |          |          |          |          |          |          |
|-------------------|----------|----------|----------|----------|----------|----------|
| NONHSAT212826.1   | 2.123582 | 2.427086 | 3.556712 | 0.013673 | 0.132844 | -2.90256 |
| lnc-DGKI-1:1      | -1.15402 | 3.924897 | -3.55585 | 0.013686 | 0.132909 | -2.90361 |
| ENST00000605407.1 | -1.29273 | 3.693451 | -3.55574 | 0.013688 | 0.132909 | -2.90374 |
| MSTRG.53254.1     | 1.104255 | 5.911422 | 3.555178 | 0.013697 | 0.132909 | -2.90443 |
| lnc-ZGRF1-2:1     | 1.025659 | 4.472536 | 3.554918 | 0.013701 | 0.132909 | -2.90474 |
| NONHSAT160040.1   | 1.056051 | 3.330532 | 3.554457 | 0.013708 | 0.132909 | -2.9053  |
| NONHSAT166303.1   | -1.34181 | 2.420289 | -3.55444 | 0.013709 | 0.132909 | -2.90533 |
| T214992           | 1.095973 | 3.502877 | 3.554238 | 0.013712 | 0.132913 | -2.90557 |
| ENST00000524008.1 | -1.69942 | 2.797849 | -3.55344 | 0.013724 | 0.13297  | -2.90654 |
| T298512           | 1.528788 | 2.790004 | 3.553205 | 0.013728 | 0.132993 | -2.90683 |
| NONHSAT163641.1   | -1.25957 | 1.775159 | -3.55268 | 0.013736 | 0.133009 | -2.90747 |
| NONHSAT217056.1   | 1.630978 | 2.964975 | 3.552133 | 0.013745 | 0.133017 | -2.90813 |
| NONHSAT220317.1   | 1.063854 | 3.48397  | 3.551701 | 0.013751 | 0.133056 | -2.90866 |
| lnc-CHRDL2-4:1    | 1.365653 | 5.474367 | 3.550776 | 0.013766 | 0.133104 | -2.90978 |
| MSTRG.62525.1     | -1.25917 | 2.028254 | -3.5504  | 0.013772 | 0.133104 | -2.91024 |
| MSTRG.31863.1     | 1.26778  | 3.901995 | 3.550224 | 0.013775 | 0.133104 | -2.91046 |
| ENST00000619560.1 | 1.909218 | 2.562603 | 3.550075 | 0.013777 | 0.133104 | -2.91064 |
| T188803           | -1.22512 | 3.051801 | -3.54886 | 0.013796 | 0.133224 | -2.91211 |
| NONHSAT182669.1   | 1.229575 | 1.669282 | 3.54885  | 0.013796 | 0.133224 | -2.91213 |
| MSTRG.58015.1     | -1.13696 | 4.587728 | -3.547   | 0.013826 | 0.133414 | -2.91438 |
| NONHSAT176684.1   | 1.168346 | 3.777385 | 3.546898 | 0.013827 | 0.133414 | -2.9145  |
| NONHSAT207120.1   | 1.00851  | 3.451182 | 3.546017 | 0.013841 | 0.133434 | -2.91558 |
| MSTRG.51670.1     | 1.619718 | 6.748017 | 3.545037 | 0.013857 | 0.133461 | -2.91677 |
| NONHSAT178083.1   | 1.057221 | 7.744767 | 3.544932 | 0.013858 | 0.133461 | -2.9169  |
| ENST00000661314.1 | 1.211814 | 3.976365 | 3.544881 | 0.013859 | 0.133461 | -2.91696 |
| MSTRG.63976.1     | 1.621099 | 1.824173 | 3.544214 | 0.01387  | 0.133496 | -2.91777 |
| NONHSAT210826.1   | 1.073671 | 1.569411 | 3.544181 | 0.01387  | 0.133496 | -2.91781 |
| NONHSAT165521.1   | 1.833943 | 2.873012 | 3.543976 | 0.013874 | 0.133496 | -2.91806 |
| ENST00000669468.1 | 1.006527 | 2.623544 | 3.543829 | 0.013876 | 0.133496 | -2.91824 |
| NONHSAT183085.1   | 1.260548 | 8.27591  | 3.54346  | 0.013882 | 0.133496 | -2.91869 |
| lnc-RTP5-3:2      | 2.087749 | 3.476837 | 3.543165 | 0.013886 | 0.133504 | -2.91905 |
| MSTRG.23692.1     | 1.565369 | 2.23983  | 3.542845 | 0.013892 | 0.133527 | -2.91944 |
| NONHSAT190043.1   | 1.276766 | 7.349768 | 3.542475 | 0.013897 | 0.133545 | -2.91989 |
| NONHSAT166762.1   | 1.235185 | 3.934592 | 3.54214  | 0.013903 | 0.133584 | -2.9203  |
| NONHSAT206443.1   | 1.117331 | 4.158834 | 3.540466 | 0.013929 | 0.133696 | -2.92234 |
| lnc-ME2-2:1       | -1.57335 | 4.547277 | -3.54046 | 0.013929 | 0.133696 | -2.92235 |
| lnc-UTS2-5:8      | -1.09742 | 1.815802 | -3.54041 | 0.01393  | 0.133696 | -2.92241 |
| MSTRG.28695.1     | 1.510586 | 1.836046 | 3.539009 | 0.013953 | 0.133812 | -2.92412 |
| lnc-LSM6-1:3      | 1.441117 | 3.657217 | 3.538881 | 0.013955 | 0.133812 | -2.92427 |
| MSTRG.47231.10    | -1.0701  | 2.798045 | -3.53718 | 0.013982 | 0.133962 | -2.92635 |
| NONHSAT170728.1   | -1.20336 | 3.256743 | -3.53642 | 0.013994 | 0.134031 | -2.92728 |
| lnc-ZNF680-12:1   | 1.240208 | 1.986331 | 3.536276 | 0.013996 | 0.134031 | -2.92745 |
| MSTRG.3694.15     | 1.87256  | 2.614197 | 3.536074 | 0.014    | 0.134031 | -2.9277  |
| MSTRG.8198.1      | -1.13886 | 6.153969 | -3.53566 | 0.014006 | 0.13408  | -2.9282  |
| lnc-HTR1D-1:1     | -1.31939 | 2.820051 | -3.53547 | 0.014009 | 0.134097 | -2.92843 |
| NONHSAT154567.1   | 1.455067 | 2.11568  | 3.5353   | 0.014012 | 0.13411  | -2.92864 |
| lnc-PDSS1-3:1     | -1.05559 | 4.535601 | -3.53393 | 0.014034 | 0.134244 | -2.93031 |
| MSTRG.10278.1     | 1.399156 | 3.825363 | 3.531939 | 0.014066 | 0.13433  | -2.93274 |

|                    |          |          |          |          |          |          |
|--------------------|----------|----------|----------|----------|----------|----------|
| ENST00000653445.1  | 1.891724 | 2.076375 | 3.531746 | 0.014069 | 0.13433  | -2.93297 |
| NONHSAT221550.1    | -1.39146 | 1.928098 | -3.53103 | 0.014081 | 0.134375 | -2.93385 |
| NONHSAT201189.1    | 1.205413 | 2.368945 | 3.530693 | 0.014086 | 0.134412 | -2.93426 |
| NONHSAT209089.1    | -1.81479 | 3.091576 | -3.53011 | 0.014096 | 0.134463 | -2.93497 |
| lnc-FGF8-1:5       | 1.421857 | 3.66828  | 3.527547 | 0.014137 | 0.134728 | -2.9381  |
| NONHSAT217040.1    | 1.85744  | 2.552075 | 3.527042 | 0.014145 | 0.134766 | -2.93872 |
| NONHSAT216332.1    | 1.593914 | 5.301463 | 3.526865 | 0.014148 | 0.134766 | -2.93893 |
| NONHSAT187426.1    | 1.08071  | 3.25767  | 3.525909 | 0.014164 | 0.134822 | -2.9401  |
| NONHSAT200358.1    | -1.10187 | 3.61203  | -3.52542 | 0.014172 | 0.134883 | -2.9407  |
| NONHSAT200253.1    | -1.19604 | 2.051125 | -3.52489 | 0.01418  | 0.134911 | -2.94134 |
| ENST00000662757.1  | -1.53296 | 3.566377 | -3.52484 | 0.014181 | 0.134911 | -2.9414  |
| NONHSAT187295.1    | 1.049119 | 6.370668 | 3.523956 | 0.014196 | 0.134995 | -2.94248 |
| lnc-ABCA5-11:1     | 1.705766 | 1.876436 | 3.523552 | 0.014202 | 0.135032 | -2.94298 |
| lnc-MAP3K8-5:2     | 1.450665 | 1.808316 | 3.52247  | 0.01422  | 0.135076 | -2.9443  |
| T055045            | 1.096702 | 1.566961 | 3.522446 | 0.01422  | 0.135076 | -2.94433 |
| lnc-DHX38-22:1     | -1.02465 | 3.485479 | -3.52212 | 0.014225 | 0.135082 | -2.94473 |
| ENST00000421041.1  | 1.043354 | 4.039745 | 3.52208  | 0.014226 | 0.135082 | -2.94478 |
| ENST00000412483.1  | 1.324305 | 4.04386  | 3.520804 | 0.014247 | 0.135158 | -2.94634 |
| NONHSAT160909.1    | 1.467644 | 1.849309 | 3.520643 | 0.01425  | 0.135158 | -2.94653 |
| lnc-VSIG10-2:1     | -1.46279 | 4.348631 | -3.51728 | 0.014305 | 0.135433 | -2.95064 |
| NONHSAT178883.1    | 1.280722 | 2.915956 | 3.516952 | 0.01431  | 0.135462 | -2.95104 |
| NONHSAT192124.1    | -1.29366 | 4.079148 | -3.51667 | 0.014315 | 0.135465 | -2.95139 |
| MSTRG.28898.1      | 1.893616 | 2.602883 | 3.51501  | 0.014342 | 0.135579 | -2.95342 |
| NONHSAT169398.1    | 1.348715 | 1.774697 | 3.514952 | 0.014343 | 0.135579 | -2.95349 |
| lnc-ST6GALNAC2-1:1 | 1.907254 | 2.048136 | 3.514239 | 0.014355 | 0.135641 | -2.95436 |
| NONHSAT211028.1    | 1.457536 | 2.655827 | 3.513806 | 0.014362 | 0.135669 | -2.95489 |
| NONHSAT186845.1    | 1.265916 | 2.959214 | 3.513173 | 0.014372 | 0.135704 | -2.95566 |
| NONHSAT215014.1    | 1.369481 | 2.415697 | 3.512075 | 0.014391 | 0.135824 | -2.95701 |
| T092428            | -1.65955 | 2.95027  | -3.51107 | 0.014407 | 0.13593  | -2.95823 |
| NONHSAT197294.1    | -1.45476 | 1.987317 | -3.51099 | 0.014409 | 0.135931 | -2.95834 |
| lnc-RASA1-14:1     | -1.65765 | 3.402969 | -3.51055 | 0.014416 | 0.135943 | -2.95887 |
| NONHSAT169840.1    | 1.648125 | 2.397221 | 3.509961 | 0.014426 | 0.135964 | -2.95959 |
| lnc-SLC1A3-1:1     | -1.40729 | 4.336281 | -3.5096  | 0.014432 | 0.135996 | -2.96004 |
| NONHSAT205867.1    | 1.517836 | 1.880102 | 3.508685 | 0.014447 | 0.13605  | -2.96116 |
| NONHSAT157898.1    | 1.207911 | 2.762878 | 3.508357 | 0.014452 | 0.136075 | -2.96156 |
| ENST00000625073.1  | 1.303023 | 1.74002  | 3.508239 | 0.014454 | 0.136075 | -2.9617  |
| lnc-PTDSS1-3:1     | -1.10222 | 4.629808 | -3.50812 | 0.014456 | 0.136075 | -2.96185 |
| NONHSAT194438.1    | 1.554568 | 3.111451 | 3.506421 | 0.014484 | 0.136159 | -2.96393 |
| ENST00000661962.1  | 1.35446  | 2.149219 | 3.505899 | 0.014493 | 0.136192 | -2.96456 |
| NONHSAT204611.1    | 1.744266 | 1.91393  | 3.505059 | 0.014507 | 0.136211 | -2.96559 |
| T002036            | 1.155435 | 2.124888 | 3.504343 | 0.014519 | 0.136235 | -2.96647 |
| LINC00879:4        | -1.1604  | 1.918656 | -3.50379 | 0.014528 | 0.13625  | -2.96715 |
| NONHSAT215297.1    | 1.038037 | 1.890687 | 3.503242 | 0.014538 | 0.13625  | -2.96782 |
| NONHSAT167152.1    | 1.85326  | 2.987989 | 3.503179 | 0.014539 | 0.13625  | -2.96789 |
| MSTRG.29578.1      | 1.103422 | 4.666099 | 3.502161 | 0.014556 | 0.136311 | -2.96914 |
| lnc-TFAM-5:1       | -1.42621 | 4.282335 | -3.5015  | 0.014567 | 0.136376 | -2.96995 |
| NR_110258          | 1.135962 | 1.786646 | 3.501418 | 0.014568 | 0.136377 | -2.97005 |
| lnc-PPA2-10:1      | 1.641925 | 2.558905 | 3.501079 | 0.014574 | 0.136384 | -2.97047 |

|                   |          |          |          |          |          |          |
|-------------------|----------|----------|----------|----------|----------|----------|
| MSTRG.61178.1     | 1.274746 | 1.727883 | 3.500409 | 0.014585 | 0.136427 | -2.97129 |
| lnc-ASPHD2-3:1    | -1.01959 | 4.280891 | -3.49935 | 0.014603 | 0.136512 | -2.97259 |
| T131984           | 1.006447 | 4.270102 | 3.499117 | 0.014607 | 0.136523 | -2.97287 |
| NONHSAT193814.1   | -1.44455 | 2.519932 | -3.49887 | 0.014611 | 0.136536 | -2.97317 |
| NONHSAT172405.1   | 1.058648 | 3.970251 | 3.498528 | 0.014617 | 0.136578 | -2.97359 |
| lnc-MARCH3-5:1    | -1.41308 | 2.159238 | -3.49796 | 0.014626 | 0.136629 | -2.97429 |
| MSTRG.49932.1     | 1.421963 | 5.421395 | 3.497748 | 0.01463  | 0.136642 | -2.97455 |
| NR_003954         | 1.727858 | 4.162906 | 3.497697 | 0.014631 | 0.136642 | -2.97461 |
| lnc-ARHGAP28-13:1 | -1.07031 | 1.890775 | -3.49728 | 0.014638 | 0.136672 | -2.97512 |
| MSTRG.64775.1     | -1.20303 | 2.526641 | -3.49696 | 0.014643 | 0.136698 | -2.97552 |
| MSTRG.3770.1      | 1.513386 | 2.006283 | 3.49634  | 0.014653 | 0.136743 | -2.97627 |
| ENST00000425820.1 | -1.23316 | 2.995422 | -3.49598 | 0.01466  | 0.136743 | -2.97672 |
| ENST00000554318.2 | 1.908491 | 3.269112 | 3.49596  | 0.01466  | 0.136743 | -2.97674 |
| NONHSAT222929.1   | 1.665571 | 3.294229 | 3.495951 | 0.01466  | 0.136743 | -2.97675 |
| lnc-ARRDC4-9:1    | -1.54153 | 3.952253 | -3.49545 | 0.014669 | 0.136771 | -2.97737 |
| NONHSAT153852.1   | -1.52509 | 1.873592 | -3.49457 | 0.014683 | 0.136797 | -2.97845 |
| MSTRG.29598.1     | 1.412683 | 3.461983 | 3.493469 | 0.014702 | 0.136888 | -2.97979 |
| lnc-UBAPIL-1:3    | -1.10043 | 2.607621 | -3.49344 | 0.014702 | 0.136888 | -2.97982 |
| lnc-C8orf48-7:1   | -1.18049 | 2.690585 | -3.49244 | 0.01472  | 0.137006 | -2.98106 |
| MSTRG.33394.1     | -2.01674 | 3.376605 | -3.49231 | 0.014722 | 0.137014 | -2.98122 |
| NONHSAT201058.1   | -1.11138 | 2.834464 | -3.49188 | 0.014729 | 0.137016 | -2.98175 |
| MSTRG.51859.1     | -1.54148 | 3.712291 | -3.49117 | 0.014741 | 0.137067 | -2.98261 |
| lnc-RAD23B-1:1    | -1.06726 | 3.727689 | -3.49077 | 0.014748 | 0.137088 | -2.98311 |
| ENST00000577281.2 | -1.0802  | 2.141993 | -3.49072 | 0.014749 | 0.137088 | -2.98317 |
| ENST00000668076.1 | 1.380653 | 4.33586  | 3.490512 | 0.014752 | 0.137095 | -2.98342 |
| ENST00000429530.1 | -1.0056  | 4.001628 | -3.48873 | 0.014783 | 0.1373   | -2.98561 |
| NONHSAT209420.1   | 1.809384 | 3.190295 | 3.488487 | 0.014787 | 0.137302 | -2.9859  |
| ENST00000446321.1 | 1.212814 | 2.805063 | 3.488329 | 0.014789 | 0.137314 | -2.9861  |
| ENST00000442815.1 | 1.55406  | 2.830666 | 3.487895 | 0.014797 | 0.137324 | -2.98663 |
| NONHSAT218189.1   | -1.42403 | 3.1812   | -3.48775 | 0.014799 | 0.137324 | -2.98681 |
| NR_038891         | 1.257211 | 2.842614 | 3.487458 | 0.014804 | 0.137324 | -2.98717 |
| ENST00000559246.1 | 1.08105  | 3.68078  | 3.487442 | 0.014805 | 0.137324 | -2.98719 |
| lnc-CLDN22-6:1    | 1.788862 | 2.468013 | 3.48743  | 0.014805 | 0.137324 | -2.9872  |
| NONHSAT180812.1   | -1.49336 | 3.266781 | -3.48739 | 0.014805 | 0.137324 | -2.98725 |
| lnc-ITGB8-4:1     | 1.6376   | 2.895488 | 3.486414 | 0.014822 | 0.137441 | -2.98845 |
| ENST00000650740.1 | -1.3824  | 2.118628 | -3.48601 | 0.014829 | 0.137457 | -2.98894 |
| ENST00000662516.1 | 1.146509 | 1.677874 | 3.485891 | 0.014831 | 0.13746  | -2.98909 |
| lnc-CDC42EP3-2:1  | 2.134812 | 3.106154 | 3.483364 | 0.014874 | 0.137774 | -2.99219 |
| NONHSAT214373.1   | 1.757641 | 2.402033 | 3.483277 | 0.014876 | 0.137774 | -2.9923  |
| NONHSAT164520.1   | 1.304677 | 5.422349 | 3.48256  | 0.014888 | 0.13784  | -2.99318 |
| ENST00000652062.1 | -1.23309 | 2.542547 | -3.48254 | 0.014889 | 0.13784  | -2.99321 |
| lnc-CTBP1-1:2     | 1.023186 | 4.55262  | 3.482173 | 0.014895 | 0.13784  | -2.99365 |
| ENST00000430184.1 | 1.422287 | 2.531103 | 3.481505 | 0.014906 | 0.137851 | -2.99447 |
| T343678           | -2.00222 | 3.906252 | -3.47976 | 0.014936 | 0.138043 | -2.99662 |
| NONHSAT204220.1   | 1.049541 | 3.982608 | 3.479324 | 0.014944 | 0.138062 | -2.99715 |
| lnc-CSF1-3:1      | 1.356373 | 1.777742 | 3.479283 | 0.014945 | 0.138062 | -2.9972  |
| lnc-ZNF518B-4:1   | -1.35543 | 2.323241 | -3.4788  | 0.014953 | 0.138095 | -2.9978  |
| ENST00000457706.1 | 1.110749 | 2.249155 | 3.478562 | 0.014957 | 0.138108 | -2.99809 |

|                   |          |          |          |          |          |          |
|-------------------|----------|----------|----------|----------|----------|----------|
| lnc-IQCH-7:1      | -1.27614 | 3.36994  | -3.47806 | 0.014966 | 0.138136 | -2.99871 |
| MSTRG.15910.2     | -1.26814 | 3.283809 | -3.47696 | 0.014985 | 0.138202 | -3.00006 |
| lnc-DHX38-29:3    | -1.40715 | 2.405418 | -3.47694 | 0.014985 | 0.138202 | -3.00008 |
| NONHSAT176395.1   | 1.902161 | 2.655672 | 3.476579 | 0.014991 | 0.138222 | -3.00052 |
| NONHSAT153668.1   | 1.579954 | 2.762992 | 3.475333 | 0.015013 | 0.138336 | -3.00206 |
| T309777           | 1.689418 | 3.547772 | 3.475242 | 0.015015 | 0.138336 | -3.00217 |
| lnc-SORBS2-3:1    | -1.48786 | 2.871606 | -3.47489 | 0.015021 | 0.138351 | -3.00261 |
| lnc-BMPER-4:1     | 1.260095 | 2.493513 | 3.474829 | 0.015022 | 0.138351 | -3.00268 |
| NONHSAT149237.1   | -1.39645 | 3.694906 | -3.47395 | 0.015037 | 0.138357 | -3.00376 |
| ENST00000426213.1 | -1.69065 | 2.200474 | -3.47357 | 0.015044 | 0.138398 | -3.00422 |
| MSTRG.64101.1     | -1.65887 | 2.191532 | -3.47294 | 0.015054 | 0.138437 | -3.00499 |
| lnc-MARCKS-19:1   | 1.27681  | 2.235311 | 3.472525 | 0.015062 | 0.138473 | -3.00551 |
| MSTRG.31192.1     | -1.71497 | 3.026195 | -3.47203 | 0.01507  | 0.138494 | -3.00611 |
| ENST00000647202.1 | -1.16    | 4.589676 | -3.47143 | 0.015081 | 0.138519 | -3.00686 |
| ENST00000419889.1 | -1.8518  | 3.003526 | -3.47109 | 0.015087 | 0.138544 | -3.00728 |
| NONHSAT150112.1   | 1.129971 | 3.198486 | 3.470616 | 0.015095 | 0.138594 | -3.00785 |
| lnc-EPSTI1-4:2    | -1.13169 | 1.732936 | -3.47008 | 0.015104 | 0.138655 | -3.00851 |
| lnc-RPN2-3:1      | -1.86284 | 2.555335 | -3.46937 | 0.015117 | 0.138716 | -3.00939 |
| T056970           | 1.470565 | 2.160523 | 3.468396 | 0.015134 | 0.138758 | -3.01058 |
| lnc-FABP2-3:1     | -1.09534 | 4.036935 | -3.46718 | 0.015155 | 0.138851 | -3.01208 |
| lnc-DDC-2:1       | -1.23255 | 4.606119 | -3.46647 | 0.015168 | 0.13891  | -3.01296 |
| NONHSAT181678.1   | 1.076839 | 2.744044 | 3.465456 | 0.015185 | 0.139036 | -3.0142  |
| NONHSAT193912.1   | 1.007924 | 6.837516 | 3.464528 | 0.015202 | 0.139095 | -3.01534 |
| lnc-RREB1-7:1     | 1.118313 | 2.219024 | 3.464513 | 0.015202 | 0.139095 | -3.01536 |
| NONHSAT174474.1   | 1.023478 | 6.065038 | 3.463926 | 0.015212 | 0.139109 | -3.01608 |
| lnc-TCEANC-3:1    | -1.2613  | 4.453534 | -3.46359 | 0.015218 | 0.139109 | -3.0165  |
| lnc-DYDC1-1:6     | -1.08574 | 4.132296 | -3.46356 | 0.015219 | 0.139109 | -3.01654 |
| MSTRG.32658.1     | 1.461191 | 1.788906 | 3.463517 | 0.015219 | 0.139109 | -3.01659 |
| ENST00000549163.1 | 1.622465 | 2.543053 | 3.46271  | 0.015234 | 0.1392   | -3.01758 |
| NONHSAT197936.1   | 1.163072 | 3.655029 | 3.46203  | 0.015246 | 0.139207 | -3.01842 |
| NONHSAT157750.1   | -1.00715 | 1.710009 | -3.46156 | 0.015254 | 0.139242 | -3.019   |
| lnc-PRR20C-5:2    | 1.335817 | 5.436316 | 3.460955 | 0.015265 | 0.139252 | -3.01974 |
| lnc-NKAIN3-12:1   | -1.12803 | 1.656837 | -3.46095 | 0.015265 | 0.139252 | -3.01975 |
| NONHSAT167757.1   | 1.577299 | 4.203021 | 3.460242 | 0.015277 | 0.139281 | -3.02062 |
| lnc-CYB5R1-1:1    | -1.15637 | 3.274271 | -3.45875 | 0.015304 | 0.139355 | -3.02245 |
| lnc-ENOPH1-2:1    | -1.66213 | 3.455985 | -3.45851 | 0.015308 | 0.139381 | -3.02275 |
| BACH1-IT2:5       | -1.22339 | 1.922399 | -3.45835 | 0.015311 | 0.139395 | -3.02295 |
| T072173           | 1.256791 | 1.869474 | 3.457139 | 0.015332 | 0.139565 | -3.02444 |
| MSTRG.48741.1     | -1.39214 | 2.367905 | -3.45547 | 0.015362 | 0.139671 | -3.02649 |
| MSTRG.10790.1     | -1.34547 | 4.635334 | -3.45525 | 0.015366 | 0.139681 | -3.02676 |
| lnc-ZFP1-1:2      | -1.13724 | 1.656865 | -3.45487 | 0.015373 | 0.139681 | -3.02724 |
| NONHSAT173077.1   | 1.474598 | 2.319573 | 3.454612 | 0.015377 | 0.139681 | -3.02755 |
| lnc-KY-1:1        | 1.324832 | 3.392573 | 3.453903 | 0.01539  | 0.139729 | -3.02843 |
| NONHSAT182771.1   | 1.14983  | 3.842688 | 3.452871 | 0.015408 | 0.139807 | -3.0297  |
| MSTRG.8952.1      | 1.247768 | 1.731661 | 3.452638 | 0.015412 | 0.139807 | -3.02999 |
| NONHSAT186995.1   | 2.155232 | 3.20754  | 3.452281 | 0.015419 | 0.139807 | -3.03043 |
| NONHSAT167034.1   | 1.121886 | 3.137509 | 3.452215 | 0.01542  | 0.139807 | -3.03051 |
| lnc-TRMT61B-5:5   | -1.4997  | 3.22933  | -3.45122 | 0.015438 | 0.139912 | -3.03173 |

|                   |          |          |          |          |          |          |
|-------------------|----------|----------|----------|----------|----------|----------|
| NONHSAT206179.1   | 1.048679 | 3.744786 | 3.450986 | 0.015442 | 0.139912 | -3.03202 |
| NONHSAT219029.1   | 1.160806 | 3.292937 | 3.450444 | 0.015452 | 0.139924 | -3.03269 |
| lnc-NDUFAF4-2:1   | -1.09124 | 2.90348  | -3.45041 | 0.015452 | 0.139924 | -3.03273 |
| MSTRG.57351.11    | 1.260941 | 2.396924 | 3.45012  | 0.015457 | 0.139934 | -3.03309 |
| lnc-SOBP-3:3      | -1.05679 | 4.218771 | -3.44998 | 0.01546  | 0.139945 | -3.03327 |
| ENST00000652905.1 | 1.191497 | 2.424922 | 3.448928 | 0.015479 | 0.14006  | -3.03456 |
| NONHSAT207628.1   | -1.09588 | 4.62186  | -3.44888 | 0.01548  | 0.14006  | -3.03462 |
| NONHSAT177958.1   | 1.775607 | 1.958267 | 3.44801  | 0.015495 | 0.140067 | -3.03569 |
| NR_038292         | 1.681221 | 3.134919 | 3.447883 | 0.015498 | 0.140067 | -3.03585 |
| lnc-SERPINE3-1:1  | -1.36971 | 2.291116 | -3.44734 | 0.015507 | 0.140121 | -3.03652 |
| NONHSAT197821.1   | 1.113383 | 4.666449 | 3.446842 | 0.015516 | 0.140148 | -3.03713 |
| NONHSAT224130.1   | 1.358178 | 2.864265 | 3.446455 | 0.015523 | 0.140165 | -3.03761 |
| ENST00000649539.1 | 1.014573 | 4.888019 | 3.445308 | 0.015544 | 0.140223 | -3.03902 |
| NONHSAT194244.1   | 1.337034 | 2.151283 | 3.444872 | 0.015552 | 0.140223 | -3.03956 |
| lnc-ACTA1-3:1     | -1.68009 | 3.429857 | -3.44466 | 0.015556 | 0.140223 | -3.03983 |
| NONHSAT167679.1   | 1.059401 | 2.721158 | 3.444476 | 0.015559 | 0.140223 | -3.04005 |
| NR_046090         | 1.320776 | 1.987374 | 3.444245 | 0.015563 | 0.140226 | -3.04034 |
| NONHSAT201133.1   | 1.676999 | 3.241314 | 3.444231 | 0.015563 | 0.140226 | -3.04035 |
| NONHSAT167079.1   | 1.33385  | 5.323282 | 3.442818 | 0.015589 | 0.140329 | -3.0421  |
| NONHSAT223586.1   | -1.2188  | 3.1836   | -3.44081 | 0.015625 | 0.14052  | -3.04457 |
| lnc-ULK4-3:2      | 1.017412 | 4.252593 | 3.440764 | 0.015626 | 0.14052  | -3.04463 |
| lnc-MRPL39-34:1   | 2.004264 | 3.209331 | 3.440763 | 0.015626 | 0.14052  | -3.04463 |
| NONHSAT172226.1   | -1.38798 | 2.366298 | -3.43771 | 0.015682 | 0.1408   | -3.0484  |
| NONHSAT211408.1   | 1.136246 | 1.706775 | 3.437131 | 0.015692 | 0.14082  | -3.04912 |
| NONHSAT182916.1   | 1.207864 | 3.827772 | 3.435292 | 0.015726 | 0.14102  | -3.05139 |
| MSTRG.14269.1     | -1.0291  | 3.599281 | -3.43506 | 0.01573  | 0.141045 | -3.05167 |
| NR_104607         | -1.16227 | 2.970074 | -3.43423 | 0.015745 | 0.141107 | -3.0527  |
| lnc-CCNB1IP1-4:4  | -1.28248 | 3.941327 | -3.4339  | 0.015751 | 0.141136 | -3.05311 |
| lnc-ANKH-5:1      | -1.03253 | 4.105505 | -3.43311 | 0.015766 | 0.141215 | -3.05409 |
| ENST00000569574.1 | 1.35879  | 2.694001 | 3.431896 | 0.015788 | 0.141383 | -3.05558 |
| NONHSAT182989.1   | 1.267786 | 2.100943 | 3.431397 | 0.015797 | 0.141433 | -3.0562  |
| lnc-ZNF781-2:2    | 1.318971 | 1.942809 | 3.431247 | 0.0158   | 0.141434 | -3.05638 |
| lnc-SLC10A6-3:1   | 1.216469 | 2.42836  | 3.430907 | 0.015806 | 0.141476 | -3.0568  |
| lnc-GPATCH1-1:1   | 1.039803 | 1.781638 | 3.430779 | 0.015808 | 0.141485 | -3.05696 |
| NONHSAT173346.1   | -1.35297 | 4.175279 | -3.43054 | 0.015813 | 0.141495 | -3.05725 |
| ENST00000623885.1 | -1.03272 | 2.921368 | -3.43041 | 0.015815 | 0.141495 | -3.05742 |
| NONHSAT155321.1   | -1.15225 | 1.723121 | -3.42999 | 0.015823 | 0.141531 | -3.05794 |
| lnc-PRLH-4:1      | 1.493859 | 3.695387 | 3.4299   | 0.015824 | 0.141531 | -3.05805 |
| NONHSAT195907.1   | 1.050134 | 1.631467 | 3.429503 | 0.015832 | 0.141569 | -3.05854 |
| NONHSAT186605.1   | 1.03619  | 3.769423 | 3.428709 | 0.015846 | 0.141626 | -3.05952 |
| NONHSAT188143.1   | 1.444609 | 2.219017 | 3.42835  | 0.015853 | 0.141626 | -3.05997 |
| NR_033856         | 1.649909 | 7.258119 | 3.428301 | 0.015854 | 0.141626 | -3.06003 |
| NONHSAT158167.1   | -1.45122 | 3.055423 | -3.42779 | 0.015863 | 0.141638 | -3.06066 |
| T342702           | 1.059963 | 6.51665  | 3.427605 | 0.015867 | 0.141653 | -3.06089 |
| lnc-ZNF37A-15:1   | 1.050592 | 8.295652 | 3.427485 | 0.015869 | 0.141653 | -3.06103 |
| lnc-FGF9-15:2     | 1.082808 | 2.927911 | 3.426162 | 0.015893 | 0.141818 | -3.06267 |
| MSTRG.47230.1     | 1.200045 | 4.612568 | 3.42454  | 0.015923 | 0.142023 | -3.06468 |
| NONHSAT157831.1   | 1.076794 | 4.426828 | 3.423885 | 0.015936 | 0.142059 | -3.06549 |

|                   |          |          |          |          |          |          |
|-------------------|----------|----------|----------|----------|----------|----------|
| MSTRG.23219.10    | -1.23922 | 4.072177 | -3.42388 | 0.015936 | 0.142059 | -3.06549 |
| NONHSAT207750.1   | 1.114175 | 1.644397 | 3.423864 | 0.015936 | 0.142059 | -3.06551 |
| ENST00000458171.1 | -1.01507 | 4.760405 | -3.42328 | 0.015947 | 0.14207  | -3.06624 |
| NONHSAT187419.1   | 1.5631   | 2.75344  | 3.422626 | 0.015959 | 0.142108 | -3.06704 |
| MSTRG.52996.1     | 1.144495 | 4.662939 | 3.422601 | 0.015959 | 0.142108 | -3.06707 |
| NONHSAT200032.1   | -1.31031 | 2.119059 | -3.42192 | 0.015972 | 0.142141 | -3.06792 |
| lnc-MIXL1-5:5     | 1.054811 | 2.91722  | 3.421641 | 0.015977 | 0.142141 | -3.06826 |
| lnc-CPZ-1:1       | 1.30813  | 4.10593  | 3.421564 | 0.015979 | 0.142141 | -3.06836 |
| NONHSAT220634.1   | -1.02023 | 5.359969 | -3.41993 | 0.016009 | 0.142347 | -3.07038 |
| MSTRG.3224.1      | 1.112867 | 5.50253  | 3.419686 | 0.016014 | 0.142359 | -3.07068 |
| MSTRG.40078.1     | 1.332561 | 2.105813 | 3.41968  | 0.016014 | 0.142359 | -3.07069 |
| NONHSAT214492.1   | 1.760374 | 2.836447 | 3.419499 | 0.016017 | 0.142365 | -3.07091 |
| NONHSAT214325.1   | 1.054234 | 2.618848 | 3.419438 | 0.016018 | 0.142365 | -3.07099 |
| ENST00000607957.1 | -1.01405 | 3.192625 | -3.41873 | 0.016031 | 0.142432 | -3.07186 |
| lnc-SETBP1-1:1    | 1.318702 | 5.518975 | 3.418234 | 0.016041 | 0.142456 | -3.07248 |
| ENST00000454040.5 | 1.445384 | 2.613314 | 3.418051 | 0.016044 | 0.142456 | -3.0727  |
| NONHSAT210343.1   | 1.405729 | 2.015907 | 3.417985 | 0.016045 | 0.142456 | -3.07279 |
| NONHSAT203565.1   | 1.28305  | 7.282543 | 3.417878 | 0.016047 | 0.142461 | -3.07292 |
| MSTRG.50035.2     | -1.09776 | 3.247214 | -3.41779 | 0.016049 | 0.142463 | -3.07303 |
| ENST00000630728.1 | -1.43937 | 2.543203 | -3.41719 | 0.01606  | 0.1425   | -3.07377 |
| NONHSAT197588.1   | -1.26841 | 2.441639 | -3.41672 | 0.016069 | 0.142553 | -3.07436 |
| MSTRG.7291.4      | -1.44581 | 3.473892 | -3.41625 | 0.016078 | 0.142561 | -3.07493 |
| lnc-XPNPEP1-3:1   | -1.3794  | 2.440542 | -3.41618 | 0.016079 | 0.142561 | -3.07501 |
| lnc-NDRG2-7:1     | -1.10136 | 2.311232 | -3.41608 | 0.016081 | 0.142561 | -3.07515 |
| NONHSAT187121.1   | 1.248381 | 1.924951 | 3.415779 | 0.016087 | 0.142561 | -3.07552 |
| NONHSAT186763.1   | 1.415235 | 10.17569 | 3.415627 | 0.016089 | 0.142561 | -3.0757  |
| NONHSAT162886.1   | 2.054562 | 3.455644 | 3.415613 | 0.01609  | 0.142561 | -3.07572 |
| NONHSAT178226.1   | -1.02381 | 2.526611 | -3.41506 | 0.0161   | 0.142602 | -3.0764  |
| NR_003714         | -1.43673 | 3.099477 | -3.4141  | 0.016118 | 0.142735 | -3.07759 |
| LINC01491:8       | 1.647047 | 2.920097 | 3.412846 | 0.016142 | 0.142833 | -3.07915 |
| MSTRG.71691.1     | -1.00339 | 3.976401 | -3.41215 | 0.016155 | 0.142868 | -3.08001 |
| NONHSAT222151.1   | 1.256182 | 2.051921 | 3.411432 | 0.016168 | 0.142868 | -3.0809  |
| NONHSAT170306.1   | 1.354963 | 3.454168 | 3.411239 | 0.016172 | 0.142887 | -3.08114 |
| NONHSAT181244.1   | 1.739123 | 2.962039 | 3.410681 | 0.016182 | 0.142931 | -3.08183 |
| SLC25A25-AS1:23   | -1.48026 | 2.890947 | -3.41057 | 0.016185 | 0.142931 | -3.08197 |
| ENST00000488190.1 | 1.60151  | 2.273041 | 3.410566 | 0.016185 | 0.142931 | -3.08197 |
| NONHSAT187827.1   | 1.506949 | 2.488789 | 3.409939 | 0.016196 | 0.142956 | -3.08275 |
| lnc-DLGAP2-8:2    | -1.30481 | 3.633414 | -3.40916 | 0.016211 | 0.14302  | -3.08371 |
| NONHSAT216979.1   | -1.26926 | 2.801189 | -3.40904 | 0.016213 | 0.143028 | -3.08386 |
| lnc-IRF4-20:9     | 1.406648 | 2.085645 | 3.408498 | 0.016224 | 0.143097 | -3.08453 |
| NONHSAT190327.1   | 1.727186 | 1.970579 | 3.408478 | 0.016224 | 0.143097 | -3.08456 |
| lnc-TENM4-3:3     | 1.160073 | 1.757926 | 3.408182 | 0.01623  | 0.143109 | -3.08493 |
| NONHSAT162377.1   | 1.489203 | 3.564402 | 3.405393 | 0.016282 | 0.143374 | -3.08838 |
| NONHSAT218173.1   | 1.025343 | 2.002318 | 3.405302 | 0.016284 | 0.143377 | -3.0885  |
| lnc-HIVEP2-6:1    | -1.47745 | 3.700858 | -3.40479 | 0.016294 | 0.143425 | -3.08913 |
| NONHSAT161534.1   | 1.118642 | 4.071834 | 3.404457 | 0.0163   | 0.143454 | -3.08954 |
| NONHSAT181265.1   | 1.032583 | 3.745225 | 3.404234 | 0.016305 | 0.143468 | -3.08982 |
| NONHSAT169882.1   | 1.692449 | 1.936416 | 3.404121 | 0.016307 | 0.143474 | -3.08996 |



|                   |          |          |          |          |          |          |
|-------------------|----------|----------|----------|----------|----------|----------|
| MSTRG.38905.1     | 1.302455 | 2.664578 | 3.40393  | 0.01631  | 0.143478 | -3.0902  |
| ENST00000451816.2 | 1.168571 | 4.672771 | 3.403752 | 0.016314 | 0.143478 | -3.09042 |
| NONHSAT166981.1   | -1.20497 | 2.069312 | -3.40373 | 0.016314 | 0.143478 | -3.09045 |
| T203095           | -1.5246  | 2.280447 | -3.40277 | 0.016332 | 0.143588 | -3.09164 |
| MSTRG.29915.15    | 1.047782 | 2.19408  | 3.402262 | 0.016342 | 0.143623 | -3.09227 |
| ENST00000660165.1 | -1.59597 | 2.898619 | -3.40142 | 0.016358 | 0.14372  | -3.09331 |
| lnc-FAM110B-12:1  | -1.34162 | 2.8247   | -3.40089 | 0.016368 | 0.143753 | -3.09397 |
| ENST00000654182.1 | -1.40616 | 3.659167 | -3.40017 | 0.016382 | 0.143781 | -3.09486 |
| NONHSAT187494.1   | 1.254052 | 5.582188 | 3.399314 | 0.016398 | 0.143867 | -3.09592 |
| lnc-KATNAL2-12:1  | -1.01395 | 3.480741 | -3.399   | 0.016404 | 0.143895 | -3.09631 |
| lnc-MTTP-1:1      | -1.02804 | 1.609466 | -3.3985  | 0.016414 | 0.143934 | -3.09693 |
| NONHSAT166605.1   | 1.874111 | 3.448062 | 3.398471 | 0.016415 | 0.143934 | -3.09697 |
| MSTRG.19995.1     | -1.17714 | 2.09529  | -3.39761 | 0.016431 | 0.143988 | -3.09803 |
| MSTRG.66005.1     | 1.225834 | 6.883777 | 3.397549 | 0.016432 | 0.143988 | -3.09811 |
| ENST00000382488.2 | -1.36689 | 3.013214 | -3.39731 | 0.016437 | 0.144    | -3.09841 |
| ENST00000656547.1 | 1.095798 | 3.798408 | 3.396861 | 0.016445 | 0.144053 | -3.09896 |
| NONHSAT195638.1   | 1.284936 | 2.369163 | 3.396741 | 0.016448 | 0.144053 | -3.09911 |
| lnc-KCNA4-9:2     | -1.42817 | 2.720084 | -3.39661 | 0.01645  | 0.144053 | -3.09928 |
| lnc-CEP63-3:1     | 1.040549 | 4.412762 | 3.396506 | 0.016452 | 0.144053 | -3.09941 |
| NONHSAT220287.1   | 1.235838 | 4.252657 | 3.396094 | 0.01646  | 0.144085 | -3.09992 |
| NONHSAT196959.1   | 1.306896 | 4.183724 | 3.39584  | 0.016465 | 0.144094 | -3.10023 |
| lnc-U2AF2-3:3     | -1.11009 | 5.072226 | -3.39574 | 0.016467 | 0.144094 | -3.10035 |
| MSTRG.17352.3     | 1.400331 | 2.960922 | 3.395451 | 0.016472 | 0.144094 | -3.10071 |
| lnc-RTP4-7:3      | 1.029533 | 4.174434 | 3.394934 | 0.016482 | 0.144128 | -3.10136 |
| NONHSAT152681.1   | -1.29701 | 2.053711 | -3.39434 | 0.016494 | 0.144177 | -3.10209 |
| NONHSAT186908.1   | -1.30444 | 2.273853 | -3.39301 | 0.01652  | 0.144319 | -3.10374 |
| NONHSAT171825.1   | 1.62294  | 2.994742 | 3.392877 | 0.016522 | 0.144319 | -3.10391 |
| T241203           | -1.27708 | 2.853539 | -3.39215 | 0.016536 | 0.144358 | -3.10482 |
| lnc-UGT8-3:1      | 1.140958 | 3.791838 | 3.392084 | 0.016537 | 0.144358 | -3.1049  |
| NONHSAT218055.1   | 1.438117 | 2.645746 | 3.391822 | 0.016542 | 0.14439  | -3.10522 |
| NONHSAT150405.1   | 1.230455 | 4.764958 | 3.391011 | 0.016558 | 0.144427 | -3.10623 |
| ENST00000447949.1 | -1.41255 | 2.608889 | -3.38996 | 0.016578 | 0.144542 | -3.10753 |
| MSTRG.7159.1      | -1.3703  | 2.827781 | -3.38996 | 0.016578 | 0.144542 | -3.10753 |
| NONHSAT178938.1   | 1.122903 | 2.179268 | 3.389475 | 0.016588 | 0.144565 | -3.10814 |
| ENST00000433933.1 | -1.11275 | 4.534295 | -3.38922 | 0.016593 | 0.144565 | -3.10845 |
| lnc-DHRSX-3:1     | 1.47727  | 2.188622 | 3.387336 | 0.016629 | 0.144729 | -3.11079 |
| lnc-IFNA8-3:1     | -1.02613 | 1.608725 | -3.38702 | 0.016636 | 0.144729 | -3.11118 |
| NONHSAT221976.1   | -1.26656 | 2.021939 | -3.38691 | 0.016638 | 0.144729 | -3.11132 |
| ENST00000433952.1 | -1.35457 | 2.38859  | -3.38647 | 0.016646 | 0.144757 | -3.11187 |
| ENST00000425802.1 | -1.11313 | 1.894789 | -3.38579 | 0.016659 | 0.144847 | -3.11271 |
| lnc-POMGNT2-1:2   | 1.30678  | 2.488985 | 3.384812 | 0.016679 | 0.144895 | -3.11393 |
| lnc-VWA3B-3:1     | -1.53927 | 2.473307 | -3.38465 | 0.016682 | 0.144895 | -3.11413 |
| MSTRG.46661.1     | 1.881874 | 6.394525 | 3.384614 | 0.016682 | 0.144895 | -3.11417 |
| NONHSAT215448.1   | -1.06897 | 2.840944 | -3.38459 | 0.016683 | 0.144895 | -3.1142  |
| lnc-ATP6V1E1-3:1  | -1.41312 | 2.58792  | -3.38339 | 0.016706 | 0.144971 | -3.1157  |
| NONHSAT204943.1   | -1.21627 | 2.384101 | -3.38247 | 0.016724 | 0.145073 | -3.11684 |
| NONHSAT183988.1   | 1.308724 | 1.827837 | 3.382025 | 0.016733 | 0.145117 | -3.11739 |
| NONHSAT199398.1   | 1.258605 | 2.285524 | 3.382002 | 0.016733 | 0.145117 | -3.11742 |

|                   |          |          |          |          |          |          |
|-------------------|----------|----------|----------|----------|----------|----------|
| MSTRG.46007.1     | -1.09597 | 1.901112 | -3.38199 | 0.016734 | 0.145117 | -3.11744 |
| NONHSAT188981.1   | -1.06709 | 3.130969 | -3.38162 | 0.016741 | 0.145151 | -3.11789 |
| T264838           | 1.201727 | 3.631225 | 3.379895 | 0.016775 | 0.145359 | -3.12004 |
| NONHSAT220733.1   | -1.31503 | 2.019956 | -3.37983 | 0.016776 | 0.145359 | -3.12012 |
| ENST00000513849.1 | 1.180956 | 2.79434  | 3.379417 | 0.016784 | 0.145392 | -3.12063 |
| NONHSAT179473.1   | 1.919244 | 3.120814 | 3.378866 | 0.016795 | 0.145453 | -3.12132 |
| T275431           | 1.182808 | 2.220498 | 3.378389 | 0.016804 | 0.145492 | -3.12191 |
| lnc-SLC22A9-1:1   | 1.035484 | 5.799671 | 3.377584 | 0.01682  | 0.145573 | -3.12291 |
| MSTRG.69717.3     | 1.303063 | 3.255992 | 3.377398 | 0.016824 | 0.145573 | -3.12315 |
| lnc-ZSWIM2-10:1   | -1.1324  | 3.768854 | -3.37737 | 0.016824 | 0.145573 | -3.12318 |
| NONHSAT155724.1   | 2.327035 | 3.76898  | 3.377182 | 0.016828 | 0.145573 | -3.12341 |
| NONHSAT201733.1   | 1.229367 | 3.830771 | 3.377116 | 0.016829 | 0.145573 | -3.1235  |
| MSTRG.22132.2     | 1.356657 | 1.788146 | 3.3771   | 0.01683  | 0.145573 | -3.12352 |
| lnc-MYLIP-5:1     | 1.061851 | 2.59529  | 3.377096 | 0.01683  | 0.145573 | -3.12352 |
| T191068           | 1.311004 | 5.15419  | 3.375893 | 0.016854 | 0.145648 | -3.12502 |
| NONHSAT161021.1   | 1.142533 | 3.792189 | 3.375272 | 0.016866 | 0.14568  | -3.12579 |
| lnc-BDH2-4:1      | -1.30202 | 10.36061 | -3.37516 | 0.016868 | 0.14568  | -3.12593 |
| NONHSAT218381.1   | -1.70506 | 3.486274 | -3.37503 | 0.01687  | 0.145689 | -3.12609 |
| lnc-SORCS3-4:3    | 1.683513 | 2.815075 | 3.374601 | 0.016879 | 0.145719 | -3.12663 |
| MSTRG.40483.1     | 1.079642 | 5.153518 | 3.374589 | 0.016879 | 0.145719 | -3.12664 |
| NR_003361         | -1.65954 | 3.278582 | -3.37457 | 0.01688  | 0.145719 | -3.12667 |
| NONHSAT158118.1   | -1.35818 | 4.081465 | -3.374   | 0.016891 | 0.145766 | -3.12738 |
| lnc-SP140L-1:3    | -1.00576 | 5.348487 | -3.37315 | 0.016908 | 0.145856 | -3.12843 |
| NONHSAT175460.1   | 2.088214 | 2.524389 | 3.373108 | 0.016909 | 0.145856 | -3.12848 |
| T264682           | 1.787988 | 2.348508 | 3.372896 | 0.016913 | 0.145857 | -3.12875 |
| NONHSAT171420.1   | -1.67458 | 3.572616 | -3.37265 | 0.016918 | 0.145857 | -3.12906 |
| NONHSAT185720.1   | 1.100703 | 3.781183 | 3.372558 | 0.016919 | 0.145857 | -3.12917 |
| lnc-BTG3-9:1      | -1.32681 | 2.065718 | -3.37252 | 0.01692  | 0.145857 | -3.12922 |
| NONHSAT186529.1   | 1.303191 | 2.776261 | 3.370967 | 0.016951 | 0.146006 | -3.13115 |
| ENST00000613067.1 | -1.14229 | 2.511989 | -3.36993 | 0.016972 | 0.146006 | -3.13244 |
| lnc-PRDM8-4:4     | -1.00917 | 2.913522 | -3.36987 | 0.016973 | 0.146006 | -3.13252 |
| MSTRG.37775.1     | 1.207887 | 4.225432 | 3.369589 | 0.016978 | 0.146006 | -3.13286 |
| NONHSAT201918.1   | 1.331972 | 2.560052 | 3.369263 | 0.016985 | 0.146006 | -3.13327 |
| T293539           | 1.274628 | 4.205236 | 3.368783 | 0.016994 | 0.146006 | -3.13387 |
| ENST00000424635.1 | -1.11155 | 1.663758 | -3.36785 | 0.017013 | 0.14605  | -3.13503 |
| MSTRG.13328.1     | -1.7179  | 2.890647 | -3.36781 | 0.017014 | 0.14605  | -3.13508 |
| NONHSAT200933.1   | -1.3504  | 3.543833 | -3.36707 | 0.017029 | 0.146093 | -3.136   |
| NONHSAT159058.1   | 1.176348 | 3.843261 | 3.367059 | 0.017029 | 0.146093 | -3.13601 |
| ENST00000662873.1 | -1.67639 | 2.680094 | -3.3653  | 0.017064 | 0.146253 | -3.13821 |
| lnc-USP38-1:1     | 1.101355 | 3.688881 | 3.364912 | 0.017072 | 0.146259 | -3.13869 |
| T153267           | -1.03519 | 6.257282 | -3.36474 | 0.017075 | 0.146259 | -3.1389  |
| NR_003686         | -1.03279 | 3.829937 | -3.36444 | 0.017081 | 0.146275 | -3.13927 |
| MSTRG.60692.16    | -1.62064 | 2.860068 | -3.36419 | 0.017086 | 0.146287 | -3.13959 |
| NONHSAT216693.1   | -1.1128  | 4.054935 | -3.36228 | 0.017125 | 0.14644  | -3.14197 |
| NONHSAT186819.1   | 1.689476 | 3.341817 | 3.36214  | 0.017127 | 0.14644  | -3.14214 |
| ENST00000483289.2 | 1.480039 | 2.849133 | 3.361824 | 0.017134 | 0.146444 | -3.14254 |
| ENST00000605021.1 | -1.05947 | 1.817931 | -3.36166 | 0.017137 | 0.146444 | -3.14274 |
| ENST00000654657.1 | -1.29452 | 2.063573 | -3.36152 | 0.01714  | 0.146444 | -3.14292 |

|                   |          |          |          |          |          |          |
|-------------------|----------|----------|----------|----------|----------|----------|
| lnc-CC2D1B-2:1    | -1.18572 | 3.965596 | -3.36146 | 0.017141 | 0.146444 | -3.14298 |
| lnc-AKR1E2-16:1   | 2.059173 | 3.341395 | 3.361323 | 0.017144 | 0.146446 | -3.14316 |
| NONHSAT153980.1   | -1.71325 | 2.815507 | -3.36124 | 0.017145 | 0.146446 | -3.14327 |
| lnc-ELOVL2-1:2    | 1.730241 | 3.386151 | 3.361123 | 0.017148 | 0.14645  | -3.14341 |
| NONHSAT157888.1   | 1.154502 | 4.881833 | 3.35958  | 0.017179 | 0.146562 | -3.14533 |
| lnc-MGAM-1:1      | 1.165028 | 5.538647 | 3.359386 | 0.017183 | 0.146568 | -3.14557 |
| NONHSAT171050.1   | 1.56314  | 2.846851 | 3.359373 | 0.017183 | 0.146568 | -3.14559 |
| NONHSAT191633.1   | 1.06126  | 4.510766 | 3.359155 | 0.017187 | 0.146593 | -3.14586 |
| NONHSAT178639.1   | -1.31986 | 2.477188 | -3.35889 | 0.017193 | 0.14662  | -3.14619 |
| NONHSAT212092.1   | 1.231558 | 4.45396  | 3.358855 | 0.017193 | 0.14662  | -3.14624 |
| NONHSAT153830.1   | 1.99221  | 3.662991 | 3.358195 | 0.017207 | 0.146708 | -3.14706 |
| ENST00000434255.1 | 1.961981 | 2.996573 | 3.357764 | 0.017216 | 0.146746 | -3.1476  |
| NONHSAT167372.1   | 1.228222 | 3.83987  | 3.357648 | 0.017218 | 0.146753 | -3.14774 |
| NONHSAT168619.1   | 2.407895 | 3.898327 | 3.35748  | 0.017221 | 0.14677  | -3.14795 |
| lnc-GNLY-1:1      | -1.1697  | 2.461654 | -3.35695 | 0.017232 | 0.146814 | -3.14861 |
| MSTRG.64920.17    | 1.508952 | 2.379969 | 3.356759 | 0.017236 | 0.146814 | -3.14885 |
| ENST00000514376.1 | -1.66045 | 3.725886 | -3.35628 | 0.017246 | 0.146829 | -3.14945 |
| ENST00000379640.1 | 1.682296 | 3.086398 | 3.355856 | 0.017254 | 0.146864 | -3.14998 |
| NONHSAT221889.1   | -1.37751 | 3.09346  | -3.35566 | 0.017258 | 0.146878 | -3.15021 |
| NONHSAT190492.1   | 1.633346 | 3.451159 | 3.355628 | 0.017259 | 0.146878 | -3.15026 |
| ENST00000491909.1 | 1.039977 | 2.61984  | 3.354817 | 0.017275 | 0.146981 | -3.15127 |
| ENST00000669963.1 | 1.380597 | 2.051249 | 3.354102 | 0.01729  | 0.147023 | -3.15216 |
| ENST00000651539.1 | 1.042753 | 3.049657 | 3.354032 | 0.017291 | 0.147023 | -3.15225 |
| ENST00000568384.1 | -1.82812 | 3.042474 | -3.35239 | 0.017325 | 0.147116 | -3.1543  |
| NONHSAT222475.1   | 1.033912 | 2.01303  | 3.352327 | 0.017326 | 0.147116 | -3.15438 |
| NONHSAT196929.1   | 1.202651 | 3.599649 | 3.352285 | 0.017327 | 0.147116 | -3.15443 |
| NONHSAT170333.1   | 1.626552 | 2.034846 | 3.352198 | 0.017328 | 0.147116 | -3.15454 |
| lnc-ZNF674-5:1    | -1.25692 | 4.686504 | -3.35163 | 0.01734  | 0.147129 | -3.15525 |
| ENST00000660070.1 | 1.447511 | 4.72795  | 3.350704 | 0.017359 | 0.147208 | -3.1564  |
| NONHSAT171730.1   | 1.011263 | 2.117216 | 3.35041  | 0.017365 | 0.147247 | -3.15677 |
| NONHSAT172570.1   | 1.239999 | 5.64347  | 3.349515 | 0.017383 | 0.147356 | -3.15789 |
| MSTRG.54686.1     | 1.812516 | 3.091388 | 3.349316 | 0.017387 | 0.147374 | -3.15813 |
| lnc-RASGRP1-7:1   | -1.47831 | 2.508725 | -3.34895 | 0.017395 | 0.1474   | -3.15859 |
| NONHSAT213799.1   | -1.18675 | 4.383649 | -3.34823 | 0.017409 | 0.147488 | -3.15949 |
| lnc-RUNDC1-3:1    | -1.77559 | 3.50099  | -3.34789 | 0.017416 | 0.147534 | -3.15991 |
| ENST00000595595.1 | -1.91112 | 3.249747 | -3.3472  | 0.01743  | 0.147625 | -3.16077 |
| lnc-NCBP2-AS2-9:2 | -1.29102 | 3.064416 | -3.34706 | 0.017433 | 0.147628 | -3.16095 |
| ENST00000615176.1 | -1.60955 | 2.381857 | -3.34667 | 0.017441 | 0.147661 | -3.16144 |
| lnc-ZIC4-1:2      | 1.378642 | 3.847416 | 3.345623 | 0.017463 | 0.147721 | -3.16274 |
| lnc-DACH2-2:1     | -1.22035 | 2.724549 | -3.34546 | 0.017466 | 0.147721 | -3.16295 |
| NONHSAT196942.1   | 2.032298 | 4.266377 | 3.345235 | 0.017471 | 0.147735 | -3.16323 |
| lnc-KLHL13-1:1    | -1.24811 | 4.558127 | -3.34457 | 0.017484 | 0.147771 | -3.16406 |
| ENST00000559959.1 | -1.60166 | 3.333479 | -3.34456 | 0.017485 | 0.147771 | -3.16407 |
| NONHSAT156612.1   | 1.065613 | 3.250928 | 3.344464 | 0.017487 | 0.147771 | -3.16419 |
| lnc-ILK-8:1       | -1.32571 | 3.017782 | -3.34439 | 0.017488 | 0.147771 | -3.16429 |
| NONHSAT191854.1   | 1.172895 | 2.054976 | 3.343456 | 0.017507 | 0.147858 | -3.16545 |
| NONHSAT196199.1   | 1.077428 | 3.153577 | 3.342951 | 0.017518 | 0.147896 | -3.16608 |
| lnc-STARD5-2:1    | 1.652014 | 2.792699 | 3.340762 | 0.017563 | 0.14803  | -3.16882 |

|                   |          |          |          |          |          |          |
|-------------------|----------|----------|----------|----------|----------|----------|
| MSTRG.19173.1     | 2.080803 | 2.852762 | 3.340268 | 0.017573 | 0.148066 | -3.16943 |
| lnc-RTL1-10:1     | -1.10766 | 4.268333 | -3.34012 | 0.017576 | 0.14808  | -3.16962 |
| NONHSAT193198.1   | 1.694246 | 2.030408 | 3.33968  | 0.017585 | 0.148119 | -3.17017 |
| ENST00000534594.1 | -1.09249 | 4.661359 | -3.33716 | 0.017637 | 0.148401 | -3.17331 |
| ENST00000598079.1 | 1.035638 | 4.832182 | 3.336003 | 0.017661 | 0.148559 | -3.17476 |
| lnc-ERI1-10:1     | 1.24758  | 4.412634 | 3.335235 | 0.017677 | 0.14866  | -3.17572 |
| lnc-RGMB-6:1      | -1.05134 | 3.309004 | -3.33497 | 0.017683 | 0.148678 | -3.17606 |
| NONHSAT167408.1   | 1.405086 | 3.989371 | 3.334736 | 0.017688 | 0.148678 | -3.17635 |
| NONHSAT170064.1   | 1.141241 | 3.811869 | 3.33449  | 0.017693 | 0.148678 | -3.17666 |
| ENST00000416076.1 | -1.01754 | 3.812076 | -3.33421 | 0.017699 | 0.148679 | -3.177   |
| ENST00000525133.2 | -1.60985 | 2.745557 | -3.33399 | 0.017703 | 0.148679 | -3.17727 |
| ENST00000623789.1 | 1.346125 | 1.790103 | 3.333886 | 0.017706 | 0.148679 | -3.17741 |
| T352292           | 1.01298  | 2.250745 | 3.333865 | 0.017706 | 0.148679 | -3.17744 |
| LINC00113:4       | 1.416506 | 4.919487 | 3.332954 | 0.017725 | 0.14878  | -3.17858 |
| NONHSAT198545.1   | 1.358833 | 2.197402 | 3.332781 | 0.017729 | 0.14878  | -3.17879 |
| T089078           | -1.02077 | 3.373407 | -3.33228 | 0.017739 | 0.148831 | -3.17942 |
| lnc-RIMS3-5:1     | 1.126676 | 3.410005 | 3.331875 | 0.017748 | 0.148879 | -3.17992 |
| lnc-ALG12-5:3     | -1.12914 | 3.374433 | -3.3314  | 0.017758 | 0.148879 | -3.18052 |
| ENST00000621331.1 | -1.51746 | 2.677197 | -3.32918 | 0.017804 | 0.149053 | -3.1833  |
| lnc-UBASH3B-7:1   | -2.14322 | 3.668003 | -3.32843 | 0.01782  | 0.149147 | -3.18423 |
| lnc-DCLRE1B-12:4  | 1.174676 | 2.053783 | 3.327836 | 0.017832 | 0.14918  | -3.18498 |
| NONHSAT187424.1   | 1.147854 | 6.468466 | 3.327138 | 0.017847 | 0.149233 | -3.18585 |
| NONHSAT214483.1   | 1.20171  | 9.260794 | 3.326732 | 0.017855 | 0.14926  | -3.18636 |
| NONHSAT179786.1   | 1.02441  | 8.138284 | 3.326358 | 0.017863 | 0.149268 | -3.18683 |
| NONHSAT201849.1   | 1.584891 | 2.342964 | 3.325876 | 0.017873 | 0.14927  | -3.18743 |
| ENST00000572608.1 | -1.04304 | 3.647985 | -3.32583 | 0.017874 | 0.14927  | -3.18749 |
| lnc-KMT5A-20:1    | 1.271955 | 6.610511 | 3.325081 | 0.01789  | 0.149278 | -3.18843 |
| NONHSAT207029.1   | -1.08626 | 2.867802 | -3.32467 | 0.017899 | 0.149313 | -3.18893 |
| lnc-CWH43-8:1     | -1.65262 | 2.462154 | -3.32457 | 0.017901 | 0.14932  | -3.18907 |
| ENST00000522028.1 | 1.312198 | 1.853745 | 3.324328 | 0.017906 | 0.14932  | -3.18937 |
| ENST00000567777.1 | 1.183011 | 2.817673 | 3.323958 | 0.017914 | 0.149328 | -3.18983 |
| NONHSAT199981.1   | 1.335562 | 3.58377  | 3.323321 | 0.017927 | 0.149354 | -3.19063 |
| lnc-PTGIR-4:1     | -1.30001 | 2.190947 | -3.32258 | 0.017943 | 0.149424 | -3.19155 |
| ENST00000658855.1 | 1.289242 | 2.067606 | 3.322273 | 0.017949 | 0.149448 | -3.19194 |
| lnc-B3GALT2-2:1   | -1.72007 | 2.733712 | -3.32223 | 0.01795  | 0.149448 | -3.192   |
| NONHSAT217763.1   | 1.520559 | 2.192745 | 3.322024 | 0.017955 | 0.149471 | -3.19225 |
| MSTRG.48258.1     | 1.457679 | 2.62766  | 3.321851 | 0.017958 | 0.149489 | -3.19247 |
| ENST00000432703.1 | -1.00496 | 3.163986 | -3.32142 | 0.017967 | 0.149512 | -3.19301 |
| NONHSAT224278.1   | 1.343631 | 2.478556 | 3.321305 | 0.01797  | 0.149512 | -3.19315 |
| lnc-ALK-3:1       | 1.020295 | 3.620603 | 3.320516 | 0.017987 | 0.149601 | -3.19414 |
| lnc-FSHR-7:1      | 1.837284 | 1.950749 | 3.318809 | 0.018023 | 0.14973  | -3.19628 |
| NONHSAT223935.1   | 1.079397 | 2.408127 | 3.318537 | 0.018029 | 0.149752 | -3.19662 |
| MSTRG.12383.1     | -1.33499 | 2.930598 | -3.31818 | 0.018036 | 0.149766 | -3.19707 |
| MSTRG.623.1       | 1.691471 | 3.288118 | 3.318116 | 0.018038 | 0.149766 | -3.19715 |
| MSTRG.11688.1     | 1.613182 | 1.922358 | 3.317788 | 0.018045 | 0.14978  | -3.19756 |
| MSTRG.27438.45    | -1.00299 | 3.501211 | -3.31768 | 0.018047 | 0.14978  | -3.19769 |
| MSTRG.40085.1     | 1.020066 | 1.591137 | 3.317148 | 0.018058 | 0.149839 | -3.19836 |
| ENST00000565271.1 | -1.4327  | 3.488542 | -3.31649 | 0.018072 | 0.149905 | -3.19918 |

|                   |          |          |          |          |          |          |
|-------------------|----------|----------|----------|----------|----------|----------|
| NONHSAT168417.1   | 1.364691 | 2.131188 | 3.31538  | 0.018096 | 0.150012 | -3.20057 |
| NONHSAT210868.1   | 1.184601 | 2.513906 | 3.315203 | 0.0181   | 0.150012 | -3.2008  |
| lnc-UGT8-10:1     | 1.280806 | 3.442054 | 3.314882 | 0.018107 | 0.150012 | -3.2012  |
| NONHSAT218493.1   | 1.572899 | 3.173134 | 3.314797 | 0.018108 | 0.150012 | -3.2013  |
| lnc-ANGPTL5-1:1   | 1.462958 | 4.062185 | 3.314648 | 0.018112 | 0.150012 | -3.20149 |
| T161830           | -1.12779 | 1.808964 | -3.31438 | 0.018117 | 0.150033 | -3.20183 |
| T310278           | -1.06896 | 2.396425 | -3.31393 | 0.018127 | 0.150063 | -3.20239 |
| NONHSAT187073.1   | -1.79314 | 2.932407 | -3.31383 | 0.018129 | 0.150066 | -3.20252 |
| lnc-UMODL1-8:1    | -1.23416 | 2.203408 | -3.31349 | 0.018136 | 0.150098 | -3.20294 |
| lnc-FOXD4L5-28:1  | 1.362828 | 3.018785 | 3.312788 | 0.018151 | 0.150103 | -3.20382 |
| MSTRG.62695.1     | 1.416997 | 2.244395 | 3.31269  | 0.018154 | 0.150103 | -3.20395 |
| NONHSAT186821.1   | 1.635138 | 3.034881 | 3.312603 | 0.018155 | 0.150103 | -3.20406 |
| T351259           | 1.270866 | 1.738706 | 3.312261 | 0.018163 | 0.150103 | -3.20448 |
| NONHSAT209258.1   | -1.1729  | 1.943468 | -3.31225 | 0.018163 | 0.150103 | -3.2045  |
| MSTRG.1901.1      | 1.051348 | 1.631935 | 3.312242 | 0.018163 | 0.150103 | -3.20451 |
| lnc-SECISBP2L-2:1 | -1.14943 | 4.646786 | -3.31189 | 0.018171 | 0.150128 | -3.20494 |
| MSTRG.38790.1     | 1.40695  | 2.805382 | 3.311145 | 0.018187 | 0.150199 | -3.20588 |
| NONHSAT197213.1   | 1.31618  | 2.861834 | 3.310548 | 0.0182   | 0.150256 | -3.20663 |
| NR_040080         | 1.273999 | 3.555558 | 3.310149 | 0.018208 | 0.150315 | -3.20713 |
| lnc-NABP1-1:2     | 1.334406 | 2.410342 | 3.308639 | 0.018241 | 0.150457 | -3.20903 |
| T038232           | 1.05905  | 1.700678 | 3.308179 | 0.018251 | 0.15048  | -3.2096  |
| lnc-GMNC-4:1      | -1.04333 | 4.00302  | -3.30731 | 0.018269 | 0.150511 | -3.21069 |
| lnc-DNASE1-8:1    | 1.047771 | 8.235745 | 3.307188 | 0.018272 | 0.15052  | -3.21084 |
| lnc-SENPA6-2:12   | -1.80612 | 3.243992 | -3.307   | 0.018276 | 0.15053  | -3.21108 |
| NONHSAT197417.1   | 1.196896 | 2.15857  | 3.306686 | 0.018283 | 0.150549 | -3.21147 |
| NR_002947         | 1.165938 | 2.061837 | 3.306343 | 0.01829  | 0.150577 | -3.21191 |
| NONHSAT153897.1   | 1.013406 | 1.981735 | 3.305758 | 0.018303 | 0.150628 | -3.21264 |
| NONHSAT203276.1   | 1.05682  | 2.390788 | 3.305327 | 0.018312 | 0.150655 | -3.21318 |
| lnc-LMOD1-5:1     | 1.314821 | 3.050426 | 3.305076 | 0.018318 | 0.150678 | -3.21349 |
| lnc-PIGF-2:1      | -1.15657 | 2.198998 | -3.30459 | 0.018328 | 0.150697 | -3.2141  |
| lnc-FAM178B-1:1   | -1.19507 | 2.216814 | -3.30453 | 0.018329 | 0.150697 | -3.21418 |
| NR_125407         | 1.025802 | 5.066976 | 3.304139 | 0.018338 | 0.150703 | -3.21467 |
| NONHSAT201612.1   | 1.07015  | 3.182105 | 3.303904 | 0.018343 | 0.150724 | -3.21496 |
| lnc-MYO16-8:1     | 1.189872 | 2.062941 | 3.303681 | 0.018348 | 0.150728 | -3.21524 |
| lnc-PWP2-2:3      | 1.544539 | 2.328769 | 3.302817 | 0.018367 | 0.150845 | -3.21633 |
| ENST00000617211.1 | -1.01673 | 6.688226 | -3.3019  | 0.018386 | 0.150942 | -3.21748 |
| lnc-SLC2A9-4:1    | -1.17171 | 4.21913  | -3.30137 | 0.018398 | 0.150942 | -3.21814 |
| lnc-RGCC-1:1      | 1.194453 | 2.625021 | 3.301319 | 0.018399 | 0.150942 | -3.21821 |
| ENST00000427182.1 | -1.35418 | 2.379526 | -3.3013  | 0.0184   | 0.150942 | -3.21824 |
| lnc-CHRNA5-3:3    | 1.768059 | 2.199781 | 3.299796 | 0.018432 | 0.151085 | -3.22012 |
| NONHSAT170745.1   | 1.526748 | 7.827657 | 3.299768 | 0.018433 | 0.151085 | -3.22016 |
| lnc-NBAS-10:1     | 1.136932 | 4.229659 | 3.299137 | 0.018447 | 0.151108 | -3.22095 |
| lnc-KLHL1-11:1    | -1.61991 | 2.668079 | -3.2985  | 0.01846  | 0.151142 | -3.22174 |
| NONHSAT154188.1   | 1.345035 | 1.844638 | 3.297844 | 0.018475 | 0.15118  | -3.22257 |
| lnc-TRMT11-2:2    | -1.35283 | 2.37541  | -3.2977  | 0.018478 | 0.151194 | -3.22275 |
| MSTRG.32668.1     | 1.438361 | 2.990353 | 3.297544 | 0.018481 | 0.151206 | -3.22295 |
| MSTRG.1479.1      | 1.942029 | 2.602551 | 3.297424 | 0.018484 | 0.151206 | -3.2231  |
| ENST00000663238.1 | 1.10126  | 5.668528 | 3.297063 | 0.018492 | 0.151258 | -3.22355 |

|                   |          |          |          |          |          |          |
|-------------------|----------|----------|----------|----------|----------|----------|
| lnc-SCYL3-2:1     | -1.23421 | 3.669649 | -3.29682 | 0.018497 | 0.151278 | -3.22386 |
| NONHSAT192036.1   | -1.48178 | 3.820976 | -3.29613 | 0.018512 | 0.151347 | -3.22472 |
| lnc-EPB41-3:1     | 1.235268 | 4.87164  | 3.296086 | 0.018513 | 0.151347 | -3.22478 |
| ENST00000507389.1 | 1.080565 | 1.563392 | 3.295151 | 0.018534 | 0.15143  | -3.22595 |
| lnc-PACRGL-12:2   | -1.38433 | 2.287432 | -3.2946  | 0.018546 | 0.151461 | -3.22664 |
| MSTRG.39322.1     | 1.093431 | 1.594061 | 3.294038 | 0.018558 | 0.15153  | -3.22735 |
| ENST00000591742.1 | 1.067692 | 4.171915 | 3.293635 | 0.018567 | 0.151566 | -3.22786 |
| lnc-RWDD3-1:8     | 1.023385 | 3.084047 | 3.292571 | 0.018591 | 0.151646 | -3.22919 |
| ENST00000554515.1 | 1.848851 | 2.692998 | 3.29242  | 0.018594 | 0.151661 | -3.22938 |
| MSTRG.49618.5     | 1.008331 | 1.998019 | 3.29207  | 0.018602 | 0.151685 | -3.22982 |
| lnc-LIPM-1:2      | -1.20329 | 4.534335 | -3.29202 | 0.018603 | 0.151685 | -3.22989 |
| ENST00000606105.1 | -1.10115 | 4.45223  | -3.29201 | 0.018603 | 0.151685 | -3.22989 |
| MSTRG.54890.1     | -1.68711 | 3.477018 | -3.2916  | 0.018612 | 0.151724 | -3.23042 |
| MSTRG.64103.1     | -1.44896 | 2.512115 | -3.29159 | 0.018612 | 0.151724 | -3.23042 |
| NONHSAT174806.1   | 2.0137   | 3.345881 | 3.291376 | 0.018617 | 0.151734 | -3.2307  |
| NONHSAT171377.1   | 1.658188 | 3.234518 | 3.291128 | 0.018622 | 0.151758 | -3.23101 |
| SNAI3-AS1:21      | 1.290561 | 3.718183 | 3.29092  | 0.018627 | 0.151772 | -3.23127 |
| lnc-COG6-7:1      | 1.547721 | 2.207239 | 3.290749 | 0.018631 | 0.151772 | -3.23148 |
| NONHSAT161158.1   | -1.32593 | 4.015118 | -3.29056 | 0.018635 | 0.151775 | -3.23173 |
| ENST00000648110.1 | 1.48715  | 2.282853 | 3.289256 | 0.018664 | 0.151855 | -3.23336 |
| lnc-MS4A4A-1:1    | 1.60755  | 2.544114 | 3.289225 | 0.018664 | 0.151855 | -3.2334  |
| NONHSAT197099.1   | 1.330889 | 1.840618 | 3.288686 | 0.018676 | 0.151886 | -3.23408 |
| MSTRG.13005.1     | -1.16114 | 2.370908 | -3.28855 | 0.018679 | 0.151886 | -3.23425 |
| ENST00000317596.3 | -1.22856 | 3.311811 | -3.28828 | 0.018685 | 0.151902 | -3.23458 |
| NONHSAT164688.1   | 1.484872 | 2.041336 | 3.28676  | 0.018719 | 0.152043 | -3.2365  |
| lnc-TMEM170A-2:1  | -1.26934 | 2.117929 | -3.28594 | 0.018737 | 0.152081 | -3.23753 |
| ENST00000654106.1 | -1.18065 | 2.841233 | -3.28589 | 0.018738 | 0.152081 | -3.2376  |
| NONHSAT164610.1   | 1.254776 | 3.070074 | 3.285874 | 0.018739 | 0.152081 | -3.23761 |
| T256644           | 1.20908  | 6.884218 | 3.28586  | 0.018739 | 0.152081 | -3.23763 |
| lnc-ACBD4-1:2     | 1.229634 | 3.529152 | 3.285574 | 0.018745 | 0.15209  | -3.23799 |
| NONHSAT214981.1   | 1.89869  | 2.103446 | 3.28552  | 0.018746 | 0.15209  | -3.23806 |
| NONHSAT204512.1   | 1.187049 | 2.11685  | 3.285351 | 0.01875  | 0.15209  | -3.23827 |
| T351389           | -1.5953  | 4.262875 | -3.28529 | 0.018751 | 0.15209  | -3.23834 |
| lnc-PRDM9-11:1    | -1.62453 | 2.884366 | -3.28523 | 0.018753 | 0.15209  | -3.23842 |
| lnc-PLA2G2D-2:1   | 1.882237 | 3.525858 | 3.285184 | 0.018754 | 0.15209  | -3.23848 |
| ENST00000562127.1 | 1.689979 | 6.478451 | 3.284972 | 0.018759 | 0.152094 | -3.23875 |
| MSTRG.51542.1     | 2.183082 | 2.769998 | 3.283855 | 0.018783 | 0.152186 | -3.24015 |
| ENST00000503268.2 | 1.043515 | 2.056808 | 3.283725 | 0.018786 | 0.152197 | -3.24031 |
| ENST00000665447.1 | 1.532108 | 2.44095  | 3.283479 | 0.018792 | 0.152202 | -3.24062 |
| NONHSAT197931.1   | -1.21947 | 2.315328 | -3.28344 | 0.018793 | 0.152202 | -3.24067 |
| NONHSAT188228.1   | -1.42063 | 1.902579 | -3.28293 | 0.018804 | 0.152251 | -3.24131 |
| NONHSAT197038.1   | 1.092734 | 2.912546 | 3.282885 | 0.018805 | 0.152251 | -3.24137 |
| ENST00000613780.4 | -1.11347 | 3.379093 | -3.28244 | 0.018815 | 0.152263 | -3.24193 |
| lnc-STK26-11:1    | 1.559105 | 2.993801 | 3.28216  | 0.018821 | 0.152295 | -3.24228 |
| lnc-PFDN4-3:2     | 1.463907 | 6.210101 | 3.282096 | 0.018823 | 0.152295 | -3.24236 |
| lnc-SLITRK5-13:2  | 1.611187 | 2.42306  | 3.281856 | 0.018828 | 0.152318 | -3.24267 |
| T346504           | 1.762216 | 2.59769  | 3.281822 | 0.018829 | 0.152318 | -3.24271 |
| NONHSAT223451.1   | 1.331367 | 1.743073 | 3.281185 | 0.018843 | 0.152362 | -3.24351 |

|                   |          |          |          |          |          |          |
|-------------------|----------|----------|----------|----------|----------|----------|
| MSTRG.70417.1     | 1.039838 | 3.70959  | 3.280754 | 0.018853 | 0.152397 | -3.24405 |
| ENST00000469794.1 | -1.30337 | 5.806897 | -3.27924 | 0.018887 | 0.152487 | -3.24596 |
| lnc-HLX-6:1       | 1.001388 | 3.358759 | 3.279142 | 0.018889 | 0.152487 | -3.24608 |
| T258078           | -1.24714 | 4.131447 | -3.27855 | 0.018902 | 0.152533 | -3.24682 |
| NONHSAT167853.1   | -1.25435 | 2.296675 | -3.27849 | 0.018903 | 0.152533 | -3.2469  |
| NONHSAT169981.1   | 1.033014 | 4.388274 | 3.278261 | 0.018908 | 0.152561 | -3.24719 |
| lnc-ZNF267-5:1    | 1.237057 | 3.161361 | 3.277776 | 0.018919 | 0.152601 | -3.2478  |
| NONHSAT209445.1   | 1.159267 | 1.765104 | 3.277507 | 0.018925 | 0.152612 | -3.24814 |
| ENST00000397750.7 | -1.16231 | 5.459948 | -3.27575 | 0.018965 | 0.152784 | -3.25035 |
| ENST00000564059.1 | 1.322397 | 2.042246 | 3.275232 | 0.018976 | 0.152841 | -3.251   |
| NONHSAT184982.1   | 1.074662 | 1.632651 | 3.275062 | 0.01898  | 0.152852 | -3.25121 |
| lnc-TBX4-3:1      | -1.23634 | 2.105584 | -3.27462 | 0.01899  | 0.152879 | -3.25178 |
| lnc-MED13L-7:1    | 1.027682 | 4.088851 | 3.273753 | 0.01901  | 0.152952 | -3.25286 |
| NONHSAT158331.1   | 1.332388 | 2.056661 | 3.273584 | 0.019014 | 0.152969 | -3.25308 |
| NONHSAT222154.1   | 1.817742 | 2.857298 | 3.272721 | 0.019033 | 0.153089 | -3.25416 |
| ENST00000434589.1 | 1.042866 | 3.775832 | 3.272044 | 0.019048 | 0.153102 | -3.25502 |
| T309646           | -1.01637 | 3.561188 | -3.27194 | 0.019051 | 0.153102 | -3.25515 |
| NONHSAT188112.1   | 1.928078 | 3.417932 | 3.271728 | 0.019056 | 0.153102 | -3.25541 |
| NONHSAT214142.1   | 1.387196 | 3.098944 | 3.271338 | 0.019064 | 0.153102 | -3.25591 |
| ENST00000660833.1 | -1.32124 | 2.488875 | -3.27001 | 0.019094 | 0.153265 | -3.25758 |
| NONHSAT216855.1   | -1.31712 | 5.660517 | -3.26987 | 0.019098 | 0.153278 | -3.25775 |
| lnc-SS18-6:1      | -2.19414 | 3.892415 | -3.26972 | 0.019101 | 0.153294 | -3.25795 |
| MSTRG.70907.1     | -1.66933 | 3.435543 | -3.26889 | 0.01912  | 0.153371 | -3.25899 |
| lnc-PPP2R3A-1:1   | -2.05683 | 2.098789 | -3.26863 | 0.019126 | 0.153394 | -3.25932 |
| MSTRG.63216.1     | 1.434833 | 2.698942 | 3.268472 | 0.019129 | 0.153394 | -3.25951 |
| ENST00000654026.1 | 1.644107 | 2.716584 | 3.268422 | 0.01913  | 0.153394 | -3.25958 |
| MSTRG.51854.1     | -1.18872 | 2.763093 | -3.26779 | 0.019145 | 0.153463 | -3.26038 |
| ENST00000445459.2 | -2.24788 | 3.529003 | -3.26667 | 0.01917  | 0.153552 | -3.26178 |
| MSTRG.36946.1     | 1.09315  | 2.426038 | 3.266159 | 0.019182 | 0.153559 | -3.26243 |
| NONHSAT210411.1   | 1.386868 | 2.827058 | 3.265999 | 0.019186 | 0.153559 | -3.26263 |
| lnc-NUTM2G-1:1    | -1.12002 | 4.331624 | -3.26582 | 0.01919  | 0.153559 | -3.26286 |
| MSTRG.27081.1     | 1.155521 | 3.959953 | 3.26526  | 0.019202 | 0.153559 | -3.26356 |
| MSTRG.54104.1     | 1.323671 | 2.077678 | 3.265251 | 0.019203 | 0.153559 | -3.26357 |
| NONHSAT186351.1   | 1.701631 | 2.494641 | 3.264972 | 0.019209 | 0.153588 | -3.26393 |
| NONHSAT150085.1   | -1.07594 | 2.585604 | -3.26494 | 0.01921  | 0.153588 | -3.26397 |
| NONHSAT190119.1   | 1.094355 | 3.321318 | 3.263249 | 0.019248 | 0.153775 | -3.2661  |
| T098583           | 1.118467 | 4.296026 | 3.262901 | 0.019256 | 0.153775 | -3.26654 |
| lnc-NSMCE1-6:1    | 1.456149 | 1.957082 | 3.262892 | 0.019257 | 0.153775 | -3.26655 |
| NONHSAT218713.1   | 1.554008 | 5.257541 | 3.262731 | 0.01926  | 0.153775 | -3.26675 |
| ENST00000663020.1 | 1.041574 | 1.601118 | 3.260945 | 0.019301 | 0.154003 | -3.269   |
| NONHSAT187284.1   | 1.250935 | 2.04522  | 3.260937 | 0.019301 | 0.154003 | -3.26901 |
| MSTRG.19434.1     | -1.18739 | 2.451666 | -3.26073 | 0.019306 | 0.154003 | -3.26927 |
| ENST00000418966.1 | 1.137084 | 7.382124 | 3.260079 | 0.019321 | 0.15409  | -3.27009 |
| lnc-ZNF41-1:1     | 1.55278  | 2.344973 | 3.259132 | 0.019343 | 0.154213 | -3.27129 |
| NONHSAT224281.1   | 1.954584 | 2.728932 | 3.258317 | 0.019362 | 0.154284 | -3.27232 |
| NONHSAT181417.1   | 1.204006 | 1.66776  | 3.257428 | 0.019382 | 0.154312 | -3.27344 |
| lnc-NXPH3-1:1     | 1.281213 | 2.49255  | 3.25721  | 0.019387 | 0.154317 | -3.27371 |
| ENST00000563464.1 | -1.35881 | 2.466    | -3.25653 | 0.019403 | 0.154344 | -3.27458 |

|                    |          |          |          |          |          |          |
|--------------------|----------|----------|----------|----------|----------|----------|
| ENST00000431442.2  | -1.2153  | 2.688872 | -3.2565  | 0.019403 | 0.154344 | -3.27461 |
| MSTRG.68058.1      | -1.06676 | 4.464649 | -3.25629 | 0.019408 | 0.154344 | -3.27487 |
| ENST00000614876.1  | -1.49179 | 2.489161 | -3.25605 | 0.019414 | 0.154344 | -3.27518 |
| MSTRG.9388.1       | 1.310192 | 4.374143 | 3.255877 | 0.019418 | 0.154344 | -3.27539 |
| lnc-DHX37-20:1     | 1.071912 | 3.145867 | 3.255718 | 0.019421 | 0.154344 | -3.27559 |
| T203653            | 1.428909 | 2.893369 | 3.254931 | 0.01944  | 0.154438 | -3.27659 |
| T197874            | 1.03516  | 2.240283 | 3.254417 | 0.019452 | 0.154484 | -3.27724 |
| lnc-PRORY-5:1      | 1.589779 | 2.012204 | 3.254235 | 0.019456 | 0.154484 | -3.27747 |
| MSTRG.60676.1      | 1.585959 | 3.257417 | 3.253933 | 0.019463 | 0.154499 | -3.27785 |
| NR_110559          | 1.431611 | 3.666084 | 3.253499 | 0.019473 | 0.154541 | -3.2784  |
| NONHSAT207185.1    | -1.35549 | 3.178879 | -3.25235 | 0.0195   | 0.154682 | -3.27985 |
| NONHSAT213836.1    | 1.356512 | 3.22494  | 3.251364 | 0.019522 | 0.154738 | -3.28109 |
| lnc-UTP23-5:1      | 1.294637 | 2.060046 | 3.250523 | 0.019542 | 0.154828 | -3.28215 |
| NONHSAT199406.1    | 1.192275 | 2.617423 | 3.250495 | 0.019543 | 0.154828 | -3.28219 |
| NONHSAT197244.1    | 1.159497 | 4.861683 | 3.250366 | 0.019546 | 0.154835 | -3.28235 |
| NONHSAT214389.1    | -2.02778 | 3.906987 | -3.24987 | 0.019557 | 0.154858 | -3.28297 |
| LINC00567:4        | 1.184532 | 3.737918 | 3.249387 | 0.019568 | 0.154911 | -3.28359 |
| NONHSAT157802.1    | 1.052372 | 3.703482 | 3.249116 | 0.019575 | 0.154931 | -3.28393 |
| ENST00000648448.1  | 1.600872 | 3.472914 | 3.248297 | 0.019594 | 0.155051 | -3.28496 |
| NONHSAT163852.1    | 2.115936 | 2.554282 | 3.247593 | 0.01961  | 0.155157 | -3.28585 |
| T257300            | 1.13341  | 5.547653 | 3.247106 | 0.019622 | 0.155214 | -3.28647 |
| NONHSAT210356.1    | 1.263817 | 2.916088 | 3.246624 | 0.019633 | 0.155226 | -3.28708 |
| lnc-ISX-5:1        | 1.664215 | 2.341028 | 3.246545 | 0.019635 | 0.155226 | -3.28718 |
| T083987            | -1.39696 | 3.853894 | -3.24649 | 0.019636 | 0.155226 | -3.28724 |
| NONHSAT221575.1    | -1.4161  | 4.419072 | -3.24594 | 0.019649 | 0.15527  | -3.28794 |
| lnc-KRTAP10-12-2:1 | 1.094545 | 5.122736 | 3.245154 | 0.019667 | 0.155371 | -3.28893 |
| NONHSAT194721.1    | -1.45831 | 2.865404 | -3.24485 | 0.019674 | 0.155371 | -3.28932 |
| NONHSAT221251.1    | 1.075061 | 1.852385 | 3.244796 | 0.019676 | 0.155371 | -3.28938 |
| NONHSAT224201.1    | -1.15707 | 2.904911 | -3.24437 | 0.019686 | 0.155399 | -3.28992 |
| NONHSAT158179.1    | 1.05232  | 3.539835 | 3.243993 | 0.019694 | 0.155412 | -3.2904  |
| lnc-ANXA10-1:1     | 1.320334 | 2.96617  | 3.243992 | 0.019694 | 0.155412 | -3.2904  |
| lnc-NAA35-4:1      | -1.07763 | 4.626291 | -3.24388 | 0.019697 | 0.155412 | -3.29055 |
| MSTRG.15684.1      | 1.084993 | 4.51793  | 3.243785 | 0.019699 | 0.155412 | -3.29066 |
| NONHSAT166310.1    | 2.096739 | 3.702957 | 3.243575 | 0.019704 | 0.155413 | -3.29093 |
| NONHSAT174618.1    | 1.215905 | 2.442666 | 3.24238  | 0.019732 | 0.155498 | -3.29244 |
| NR_104061          | 1.468006 | 2.507741 | 3.240333 | 0.019781 | 0.155662 | -3.29502 |
| MSTRG.18216.22     | 1.124576 | 3.927989 | 3.240311 | 0.019781 | 0.155662 | -3.29505 |
| lnc-TDRD9-3:1      | 1.066552 | 2.127968 | 3.240268 | 0.019782 | 0.155662 | -3.29511 |
| lnc-ARHGAP29-7:1   | 1.143593 | 3.872496 | 3.239846 | 0.019792 | 0.155716 | -3.29564 |
| lnc-PPP2R2D-8:1    | 1.45393  | 2.508899 | 3.238316 | 0.019828 | 0.155842 | -3.29757 |
| lnc-NME3-2:2       | 1.386054 | 2.349029 | 3.237863 | 0.019839 | 0.155882 | -3.29815 |
| NONHSAT210350.1    | -1.35521 | 1.966619 | -3.23774 | 0.019842 | 0.155882 | -3.2983  |
| lnc-SPACA7-26:1    | 1.213307 | 2.150175 | 3.237465 | 0.019848 | 0.155891 | -3.29865 |
| NONHSAT205841.1    | 1.313176 | 1.713316 | 3.237282 | 0.019853 | 0.155912 | -3.29888 |
| MSTRG.1673.2       | 1.081268 | 4.814378 | 3.236885 | 0.019862 | 0.15596  | -3.29938 |
| lnc-PCLO-2:1       | 1.175628 | 1.705187 | 3.23632  | 0.019875 | 0.156004 | -3.3001  |
| MSTRG.68535.1      | 1.287416 | 2.530726 | 3.236153 | 0.019879 | 0.156013 | -3.30031 |
| LINC02140:12       | -1.23217 | 2.489639 | -3.23521 | 0.019902 | 0.156086 | -3.3015  |



|                   |          |          |          |          |          |          |
|-------------------|----------|----------|----------|----------|----------|----------|
| lnc-CDC42BPB-5:8  | -1.35217 | 2.59167  | -3.23517 | 0.019903 | 0.156086 | -3.30155 |
| lnc-MCC-2:1       | 1.158043 | 3.792378 | 3.234409 | 0.019921 | 0.156168 | -3.30251 |
| lnc-COG3-5:1      | -1.5624  | 4.363953 | -3.23383 | 0.019935 | 0.156198 | -3.30325 |
| MSTRG.3511.1      | 1.70456  | 2.398747 | 3.233003 | 0.019954 | 0.156239 | -3.30429 |
| NONHSAT185446.1   | 1.066264 | 3.914484 | 3.232793 | 0.019959 | 0.156239 | -3.30456 |
| NONHSAT163888.1   | 1.438743 | 4.906402 | 3.232717 | 0.019961 | 0.156239 | -3.30465 |
| lnc-OGFRL1-7:1    | -1.49768 | 2.345019 | -3.23246 | 0.019967 | 0.156239 | -3.30498 |
| lnc-VEGFC-4:1     | 1.007358 | 5.707314 | 3.232033 | 0.019977 | 0.156283 | -3.30552 |
| ENST00000508985.1 | 1.022148 | 3.267377 | 3.231033 | 0.020001 | 0.156407 | -3.30679 |
| lnc-CYLC2-7:1     | 1.033859 | 1.565686 | 3.229313 | 0.020042 | 0.156657 | -3.30896 |
| lnc-SDSL-9:1      | 1.325096 | 1.767134 | 3.2285   | 0.020062 | 0.156749 | -3.30999 |
| ENST00000419957.6 | 1.096673 | 3.374981 | 3.228352 | 0.020065 | 0.156764 | -3.31018 |
| NONHSAT170130.1   | 1.001809 | 4.850761 | 3.227999 | 0.020074 | 0.15681  | -3.31063 |
| lnc-RLIM-1:2      | 1.142338 | 2.295752 | 3.227888 | 0.020076 | 0.15681  | -3.31077 |
| lnc-IFT74-7:1     | 1.390634 | 2.000271 | 3.227847 | 0.020077 | 0.15681  | -3.31082 |
| MSTRG.50374.1     | 1.545365 | 5.121426 | 3.227677 | 0.020081 | 0.156823 | -3.31103 |
| ENST00000567305.1 | -1.06849 | 4.508595 | -3.22745 | 0.020087 | 0.156824 | -3.31132 |
| lnc-FAM83A-5:1    | -1.08052 | 4.598673 | -3.22641 | 0.020112 | 0.156921 | -3.31263 |
| NONHSAT161307.1   | 1.714617 | 2.79549  | 3.226209 | 0.020117 | 0.156947 | -3.31289 |
| MSTRG.48462.1     | 1.001518 | 3.104516 | 3.224886 | 0.020148 | 0.157069 | -3.31457 |
| lnc-MRPL19-14:1   | -1.0943  | 1.780523 | -3.22459 | 0.020156 | 0.15707  | -3.31494 |
| ENST00000507403.1 | 1.258102 | 3.511522 | 3.224583 | 0.020156 | 0.15707  | -3.31495 |
| NONHSAT216460.1   | 1.037211 | 2.468444 | 3.224315 | 0.020162 | 0.157096 | -3.31529 |
| MSTRG.3690.1      | 1.770164 | 2.843178 | 3.223908 | 0.020172 | 0.157124 | -3.3158  |
| MSTRG.37326.1     | 1.446582 | 2.487308 | 3.223624 | 0.020179 | 0.157132 | -3.31616 |
| NONHSAT197480.1   | 1.252051 | 2.011738 | 3.223614 | 0.020179 | 0.157132 | -3.31618 |
| lnc-AR SJ-1:8     | -1.13184 | 4.581528 | -3.22246 | 0.020207 | 0.157221 | -3.31764 |
| ENST00000603521.1 | -1.05257 | 5.433166 | -3.2224  | 0.020208 | 0.157221 | -3.31772 |
| lnc-SLC11A2-4:1   | -1.18218 | 4.072579 | -3.22223 | 0.020213 | 0.157221 | -3.31793 |
| NONHSAT222202.1   | 1.78611  | 2.789488 | 3.21938  | 0.020281 | 0.157514 | -3.32154 |
| lnc-IGFBP7-2:1    | 1.327761 | 2.144005 | 3.219068 | 0.020289 | 0.15756  | -3.32193 |
| lnc-CRTC3-4:1     | 1.34776  | 2.196753 | 3.218713 | 0.020298 | 0.1576   | -3.32238 |
| NONHSAT155897.1   | -1.57802 | 3.378576 | -3.21851 | 0.020303 | 0.157605 | -3.32265 |
| T350762           | 1.140271 | 4.88834  | 3.217774 | 0.02032  | 0.157622 | -3.32357 |
| MSTRG.1887.1      | -1.02075 | 2.485316 | -3.21766 | 0.020323 | 0.15763  | -3.32371 |
| PRKAG2-AS1:4      | -1.02015 | 1.811767 | -3.21623 | 0.020358 | 0.157779 | -3.32553 |
| NONHSAT221748.1   | 1.635603 | 2.511491 | 3.215455 | 0.020377 | 0.157902 | -3.32651 |
| T363691           | 1.168704 | 2.049971 | 3.215291 | 0.020381 | 0.157908 | -3.32672 |
| NONHSAT154639.1   | -1.3194  | 1.795305 | -3.21495 | 0.020389 | 0.157941 | -3.32716 |
| T145022           | -1.04771 | 3.094086 | -3.21482 | 0.020392 | 0.157941 | -3.32732 |
| NONHSAT201178.1   | 1.072228 | 2.968331 | 3.214677 | 0.020396 | 0.157941 | -3.3275  |
| MSTRG.71160.16    | 1.092264 | 4.76913  | 3.213761 | 0.020418 | 0.158015 | -3.32866 |
| NONHSAT196914.1   | -1.28666 | 1.891919 | -3.2136  | 0.020422 | 0.158021 | -3.32886 |
| NONHSAT161203.1   | 1.012242 | 3.804944 | 3.212891 | 0.020439 | 0.158107 | -3.32976 |
| NONHSAT201466.1   | 1.113216 | 4.172389 | 3.212406 | 0.020451 | 0.158168 | -3.33038 |
| ENST00000662277.1 | -1.4311  | 2.631774 | -3.212   | 0.020461 | 0.158218 | -3.33089 |
| lnc-KIN-5:1       | 1.334135 | 2.472873 | 3.211698 | 0.020469 | 0.15826  | -3.33128 |
| lnc-CLK4-3:1      | 1.136632 | 3.748106 | 3.210054 | 0.020509 | 0.158353 | -3.33336 |

|                   |          |          |          |          |          |          |
|-------------------|----------|----------|----------|----------|----------|----------|
| lnc-ITPRIP-6:1    | 1.093847 | 6.629594 | 3.209838 | 0.020514 | 0.158379 | -3.33364 |
| ENST00000370380.2 | -1.33502 | 2.003498 | -3.20948 | 0.020523 | 0.158379 | -3.33408 |
| NONHSAT170715.1   | -1.58888 | 2.996233 | -3.20895 | 0.020536 | 0.15838  | -3.33476 |
| NONHSAT187861.1   | 1.017656 | 3.231606 | 3.208804 | 0.02054  | 0.158384 | -3.33495 |
| lnc-FAM3B-3:1     | -1.06135 | 3.474574 | -3.20865 | 0.020543 | 0.158396 | -3.33514 |
| ENST00000430651.1 | 1.000575 | 8.474413 | 3.2086   | 0.020545 | 0.158396 | -3.33521 |
| lnc-ZFP42-8:1     | -1.2556  | 1.829368 | -3.20835 | 0.020551 | 0.158396 | -3.33552 |
| lnc-SLC25A48-3:3  | 1.592887 | 2.279997 | 3.208319 | 0.020552 | 0.158396 | -3.33556 |
| lnc-RHOV-1:1      | -1.28731 | 2.751522 | -3.20817 | 0.020555 | 0.158396 | -3.33575 |
| ENST00000421002.1 | 1.054374 | 6.069504 | 3.207952 | 0.020561 | 0.158411 | -3.33603 |
| NONHSAT163191.1   | -1.27578 | 4.008533 | -3.20726 | 0.020578 | 0.158459 | -3.33691 |
| lnc-MACC1-1:11    | -1.06292 | 3.067497 | -3.2069  | 0.020587 | 0.158497 | -3.33737 |
| lnc-TRMT11-3:1    | -1.17331 | 2.946283 | -3.20668 | 0.020592 | 0.158497 | -3.33765 |
| MSTRG.29187.1     | 1.380742 | 2.11608  | 3.2054   | 0.020623 | 0.158642 | -3.33927 |
| ENST00000507424.1 | 1.175011 | 1.630467 | 3.205399 | 0.020623 | 0.158642 | -3.33927 |
| NONHSAT197816.1   | -2.07149 | 3.579081 | -3.20482 | 0.020638 | 0.158693 | -3.34001 |
| lnc-C1orf74-3:1   | -1.12711 | 4.091572 | -3.2041  | 0.020656 | 0.158805 | -3.34092 |
| lnc-ZNF649-3:6    | -1.24198 | 2.471079 | -3.20392 | 0.02066  | 0.158815 | -3.34115 |
| ENST00000651165.1 | 1.394122 | 2.392636 | 3.203493 | 0.020671 | 0.158848 | -3.34168 |
| lnc-ABL2-1:1      | -1.27616 | 3.136016 | -3.20272 | 0.02069  | 0.158897 | -3.34266 |
| NONHSAT186971.1   | -1.40994 | 1.866268 | -3.20265 | 0.020691 | 0.158898 | -3.34275 |
| MSTRG.29530.2     | -1.10858 | 4.833158 | -3.20219 | 0.020703 | 0.158914 | -3.34334 |
| NONHSAT196754.1   | 1.402567 | 2.223258 | 3.201701 | 0.020715 | 0.158971 | -3.34396 |
| ENST00000668286.1 | 1.386026 | 6.664199 | 3.201317 | 0.020725 | 0.159007 | -3.34445 |
| NONHSAT161115.1   | -1.16452 | 3.449956 | -3.20077 | 0.020738 | 0.159063 | -3.34514 |
| MSTRG.16812.3     | 1.303519 | 1.884302 | 3.199937 | 0.020759 | 0.15913  | -3.3462  |
| NONHSAT210419.1   | 1.318082 | 8.286115 | 3.199735 | 0.020764 | 0.15914  | -3.34646 |
| NONHSAT186288.1   | -1.16335 | 2.282887 | -3.19944 | 0.020771 | 0.159158 | -3.34683 |
| lnc-ELP3-1:1      | -1.21589 | 3.965045 | -3.19927 | 0.020775 | 0.159158 | -3.34705 |
| ENST00000660450.1 | -1.31858 | 2.09283  | -3.19899 | 0.020782 | 0.159158 | -3.34741 |
| NONHSAT149434.1   | -1.05376 | 3.737737 | -3.19855 | 0.020793 | 0.159184 | -3.34796 |
| MSTRG.65993.1     | -1.05431 | 2.311172 | -3.19837 | 0.020798 | 0.159204 | -3.34819 |
| NONHSAT215088.1   | -1.06351 | 2.679742 | -3.19812 | 0.020804 | 0.159231 | -3.34851 |
| ENST00000448963.5 | 1.244512 | 2.141468 | 3.196666 | 0.02084  | 0.159387 | -3.35035 |
| ENST00000658162.1 | 1.127806 | 7.679237 | 3.196116 | 0.020854 | 0.159477 | -3.35105 |
| LINC01337:1       | -1.556   | 3.958348 | -3.19484 | 0.020886 | 0.159603 | -3.35268 |
| NONHSAT172699.1   | -1.42256 | 4.879839 | -3.19432 | 0.020899 | 0.159666 | -3.35334 |
| lnc-ATP6V0D1-1:2  | 1.193864 | 1.907769 | 3.193577 | 0.020918 | 0.159733 | -3.35428 |
| NONHSAT153522.1   | 1.199719 | 2.654959 | 3.19344  | 0.020921 | 0.159733 | -3.35445 |
| ENST00000510203.1 | 1.177889 | 4.826669 | 3.193335 | 0.020924 | 0.159733 | -3.35458 |
| MSTRG.65892.3     | 1.036978 | 2.689269 | 3.192552 | 0.020943 | 0.159775 | -3.35558 |
| lnc-NCOR2-7:1     | 1.927976 | 3.346433 | 3.191341 | 0.020974 | 0.159886 | -3.35712 |
| NONHSAT173357.1   | -1.37261 | 3.261281 | -3.19116 | 0.020978 | 0.159909 | -3.35735 |
| MSTRG.70295.1     | 1.194272 | 2.129299 | 3.190873 | 0.020986 | 0.159928 | -3.35771 |
| MSTRG.34997.2     | 1.326722 | 2.224144 | 3.190373 | 0.020998 | 0.159967 | -3.35835 |
| lnc-KANSL1-7:3    | -1.1111  | 1.793035 | -3.19029 | 0.021    | 0.159967 | -3.35845 |
| lnc-DSG1-13:2     | -1.20836 | 1.657216 | -3.19029 | 0.021    | 0.159967 | -3.35846 |
| NONHSAT218785.1   | -1.16945 | 2.485545 | -3.18924 | 0.021027 | 0.160079 | -3.35978 |

|                    |          |          |          |          |          |          |
|--------------------|----------|----------|----------|----------|----------|----------|
| NONHSAT175806.1    | 1.673513 | 2.0335   | 3.18922  | 0.021027 | 0.160079 | -3.35981 |
| MSTRG.38899.7      | 1.77238  | 3.669874 | 3.188765 | 0.021039 | 0.160151 | -3.36039 |
| lnc-UBA1-1:1       | 1.261518 | 2.84528  | 3.187269 | 0.021077 | 0.160366 | -3.36229 |
| NONHSAT197195.1    | -1.23982 | 2.919741 | -3.18675 | 0.02109  | 0.160421 | -3.36295 |
| NONHSAT196992.1    | 1.34373  | 6.949708 | 3.1867   | 0.021091 | 0.160421 | -3.36302 |
| lnc-DCUN1D1-12:1   | 1.59739  | 2.841448 | 3.186444 | 0.021097 | 0.160428 | -3.36334 |
| NONHSAT182409.1    | -1.02649 | 5.425981 | -3.18625 | 0.021102 | 0.160451 | -3.36359 |
| NONHSAT169688.1    | -1.02086 | 1.615345 | -3.18598 | 0.021109 | 0.160465 | -3.36393 |
| NONHSAT201319.1    | 1.379933 | 1.808087 | 3.185975 | 0.021109 | 0.160465 | -3.36394 |
| lnc-SPTLC3-7:1     | 1.783409 | 2.101417 | 3.185531 | 0.021121 | 0.160471 | -3.36451 |
| NONHSAT203064.1    | 1.040373 | 3.680349 | 3.185171 | 0.02113  | 0.160504 | -3.36496 |
| ENST00000548779.1  | -1.01119 | 5.188241 | -3.18502 | 0.021134 | 0.160521 | -3.36516 |
| NONHSAT203399.1    | 1.611536 | 2.827442 | 3.184237 | 0.021153 | 0.160611 | -3.36615 |
| ENST00000663056.1  | 1.9175   | 7.9493   | 3.183617 | 0.021169 | 0.160651 | -3.36694 |
| lnc-AKR1B1-3:2     | -1.18204 | 6.457705 | -3.18277 | 0.021191 | 0.160681 | -3.36801 |
| MSTRG.51547.1      | 1.433267 | 2.41081  | 3.182373 | 0.021201 | 0.160681 | -3.36852 |
| NONHSAT223779.1    | 1.107357 | 3.690804 | 3.181653 | 0.021219 | 0.160708 | -3.36944 |
| lnc-CDH12-8:1      | 1.980318 | 3.565326 | 3.181569 | 0.021221 | 0.160708 | -3.36954 |
| lnc-CDK17-12:1     | -1.15338 | 2.175584 | -3.18127 | 0.021229 | 0.16074  | -3.36993 |
| NONHSAT206189.1    | 1.089425 | 3.966765 | 3.181137 | 0.021232 | 0.16074  | -3.37009 |
| lnc-LRIG1-5:1      | 1.334271 | 4.711417 | 3.181067 | 0.021234 | 0.16074  | -3.37018 |
| NONHSAT216824.1    | -1.11882 | 1.796204 | -3.17937 | 0.021277 | 0.160946 | -3.37234 |
| NONHSAT187409.1    | 1.200633 | 4.958334 | 3.178252 | 0.021306 | 0.161053 | -3.37377 |
| NONHSAT189010.1    | 1.235337 | 2.071222 | 3.177951 | 0.021314 | 0.161053 | -3.37415 |
| MSTRG.50367.1      | 1.260347 | 3.224579 | 3.177882 | 0.021315 | 0.161053 | -3.37424 |
| MSTRG.22862.1      | -1.43316 | 2.943658 | -3.17782 | 0.021317 | 0.161054 | -3.37432 |
| lnc-SUMO1-2:3      | -1.23846 | 1.76988  | -3.17763 | 0.021322 | 0.161067 | -3.37456 |
| lnc-TMSB15A-6:1    | -1.01327 | 2.823289 | -3.17752 | 0.021325 | 0.161076 | -3.3747  |
| ENST00000505408.1  | 1.044948 | 3.512943 | 3.175877 | 0.021367 | 0.161309 | -3.37679 |
| lnc-EXD2-9:1       | -1.00528 | 3.274848 | -3.17547 | 0.021377 | 0.161337 | -3.37731 |
| MSTRG.21431.1      | -1.20457 | 3.022621 | -3.17531 | 0.021381 | 0.161337 | -3.37751 |
| lnc-SLC6A15-2:1    | 1.827052 | 2.547255 | 3.175229 | 0.021384 | 0.161337 | -3.37761 |
| NONHSAT156399.1    | 1.185481 | 3.789512 | 3.174768 | 0.021395 | 0.161353 | -3.3782  |
| ENST00000562917.1  | 1.223236 | 2.432388 | 3.1747   | 0.021397 | 0.161353 | -3.37829 |
| lnc-EFCAB14-1:2    | -1.00611 | 3.755999 | -3.17456 | 0.021401 | 0.161353 | -3.37847 |
| lnc-MTRNR2L13-11:1 | -1.14418 | 2.095025 | -3.17428 | 0.021408 | 0.161353 | -3.37882 |
| MSTRG.23779.1      | 1.346796 | 2.635556 | 3.173859 | 0.021419 | 0.161411 | -3.37936 |
| NONHSAT189106.1    | 1.375091 | 3.483577 | 3.173772 | 0.021421 | 0.161415 | -3.37947 |
| lnc-SLC39A10-2:2   | 1.414063 | 2.74174  | 3.173511 | 0.021428 | 0.161438 | -3.3798  |
| MSTRG.21837.2      | -1.33765 | 2.7391   | -3.17347 | 0.021429 | 0.161438 | -3.37985 |
| NONHSAT198275.1    | 1.11858  | 1.727397 | 3.173215 | 0.021435 | 0.161462 | -3.38018 |
| ENST00000610044.1  | 1.420872 | 2.472105 | 3.17316  | 0.021437 | 0.161462 | -3.38025 |
| NONHSAT169943.1    | 1.109634 | 7.054066 | 3.172401 | 0.021456 | 0.161513 | -3.38121 |
| NONHSAT218017.1    | 1.116177 | 2.631019 | 3.172401 | 0.021456 | 0.161513 | -3.38121 |
| MSTRG.54202.1      | 1.403682 | 1.77503  | 3.171921 | 0.021469 | 0.161551 | -3.38183 |
| NONHSAT221999.1    | 2.067108 | 3.620861 | 3.170963 | 0.021493 | 0.161596 | -3.38305 |
| ENST00000636210.1  | 1.599964 | 6.454199 | 3.169856 | 0.021522 | 0.161622 | -3.38446 |
| NONHSAT160749.1    | -1.18258 | 2.474563 | -3.16831 | 0.021562 | 0.161778 | -3.38643 |

|                   |          |          |          |          |          |          |
|-------------------|----------|----------|----------|----------|----------|----------|
| NONHSAT213998.1   | 1.015035 | 1.876943 | 3.168145 | 0.021566 | 0.161796 | -3.38663 |
| lnc-ZEB1-6:1      | -1.02324 | 4.825147 | -3.16797 | 0.021571 | 0.161796 | -3.38686 |
| NONHSAT191699.1   | 1.04164  | 4.741301 | 3.167648 | 0.021579 | 0.161811 | -3.38727 |
| ENST00000565668.2 | -1.30605 | 4.229228 | -3.16668 | 0.021604 | 0.16192  | -3.3885  |
| NONHSAT194280.1   | 1.750888 | 3.225471 | 3.165971 | 0.021623 | 0.161993 | -3.38941 |
| NONHSAT175007.1   | 1.298171 | 3.995867 | 3.165955 | 0.021623 | 0.161993 | -3.38943 |
| NONHSAT190210.1   | 1.732419 | 5.256474 | 3.164522 | 0.021661 | 0.162143 | -3.39125 |
| NONHSAT201234.1   | 1.103239 | 1.746158 | 3.164279 | 0.021667 | 0.162155 | -3.39156 |
| lnc-SMIM14-4:1    | 1.158834 | 7.030053 | 3.163263 | 0.021694 | 0.162254 | -3.39286 |
| NONHSAT154813.1   | 1.247207 | 3.548525 | 3.163131 | 0.021697 | 0.162254 | -3.39303 |
| lnc-PDE10A-1:4    | 1.076988 | 7.03209  | 3.162378 | 0.021717 | 0.162308 | -3.39398 |
| ENST00000441348.1 | -1.01291 | 2.698359 | -3.16186 | 0.02173  | 0.162349 | -3.39464 |
| NONHSAT223893.1   | -1.31459 | 2.575718 | -3.16152 | 0.021739 | 0.162392 | -3.39508 |
| NONHSAT224455.1   | 1.156775 | 4.110161 | 3.159707 | 0.021787 | 0.162542 | -3.39739 |
| MSTRG.16859.1     | 1.383459 | 2.02712  | 3.159622 | 0.021789 | 0.162542 | -3.3975  |
| NONHSAT187765.1   | 1.520027 | 3.103482 | 3.159248 | 0.021799 | 0.16256  | -3.39798 |
| MSTRG.60246.1     | 1.857072 | 2.069875 | 3.159108 | 0.021802 | 0.16256  | -3.39816 |
| lnc-DAP-14:1      | 1.462405 | 2.782221 | 3.158899 | 0.021808 | 0.16256  | -3.39842 |
| lnc-NCOA3-13:1    | 1.486747 | 2.655823 | 3.158881 | 0.021808 | 0.16256  | -3.39844 |
| lnc-NUP214-2:1    | -1.31937 | 2.816962 | -3.15764 | 0.021841 | 0.162621 | -3.40002 |
| LINC01422:4       | 1.143654 | 1.871923 | 3.157299 | 0.02185  | 0.162654 | -3.40046 |
| NONHSAT186868.1   | 1.013389 | 4.468043 | 3.157181 | 0.021853 | 0.162665 | -3.40061 |
| MSTRG.47804.1     | -1.04491 | 4.784813 | -3.15683 | 0.021862 | 0.162702 | -3.40106 |
| ENST00000654498.1 | 2.256528 | 2.148158 | 3.156176 | 0.021879 | 0.162802 | -3.40189 |
| NONHSAT217255.1   | 1.461327 | 2.25143  | 3.153856 | 0.021941 | 0.163042 | -3.40486 |
| lnc-FGF16-1:1     | -1.52664 | 4.149932 | -3.15366 | 0.021946 | 0.163067 | -3.4051  |
| lnc-CTNNB1-4:1    | 1.059988 | 1.867254 | 3.152828 | 0.021968 | 0.163115 | -3.40617 |
| lnc-PAXIP1-6:1    | -1.12957 | 3.211089 | -3.15199 | 0.02199  | 0.163216 | -3.40724 |
| ENST00000668059.1 | 1.284133 | 2.143297 | 3.151127 | 0.022013 | 0.163313 | -3.40834 |
| NONHSAT188127.1   | 1.329326 | 2.159672 | 3.150745 | 0.022023 | 0.163365 | -3.40882 |
| lnc-PRTG-1:1      | -1.00217 | 3.010025 | -3.1499  | 0.022046 | 0.163458 | -3.4099  |
| ENST00000574365.1 | -1.37933 | 1.915983 | -3.1497  | 0.022051 | 0.163475 | -3.41016 |
| ENST00000655724.1 | -1.11735 | 1.636821 | -3.14937 | 0.02206  | 0.163488 | -3.41058 |
| MSTRG.54157.1     | -1.29262 | 3.121324 | -3.14928 | 0.022062 | 0.163488 | -3.41069 |
| MSTRG.51163.1     | -1.24019 | 2.200019 | -3.14899 | 0.02207  | 0.163519 | -3.41107 |
| lnc-TSPYL5-4:1    | 1.036688 | 3.540604 | 3.148364 | 0.022086 | 0.163606 | -3.41187 |
| NONHSAT153665.1   | 1.317033 | 2.137388 | 3.147033 | 0.022122 | 0.163724 | -3.41357 |
| lnc-SCGB2B2-10:2  | 1.307486 | 4.67791  | 3.146987 | 0.022123 | 0.163724 | -3.41362 |
| NONHSAT196574.1   | 1.447913 | 2.37672  | 3.146636 | 0.022133 | 0.163761 | -3.41407 |
| NONHSAT207605.1   | 1.7978   | 2.821588 | 3.145767 | 0.022156 | 0.163894 | -3.41518 |
| NONHSAT179213.1   | 1.125917 | 1.686488 | 3.145666 | 0.022158 | 0.163894 | -3.41531 |
| MSTRG.63714.1     | 1.053795 | 3.232717 | 3.1453   | 0.022168 | 0.163945 | -3.41578 |
| T172511           | 1.199185 | 2.77623  | 3.144218 | 0.022197 | 0.164052 | -3.41716 |
| NONHSAT173381.1   | 1.180213 | 4.265466 | 3.143367 | 0.02222  | 0.164101 | -3.41825 |
| ENST00000668106.1 | 1.264604 | 1.655263 | 3.142869 | 0.022233 | 0.164163 | -3.41888 |
| lnc-ALDH7A1-3:1   | 1.613349 | 2.438842 | 3.142506 | 0.022243 | 0.164186 | -3.41935 |
| lnc-RBM26-3:1     | 1.577962 | 3.939739 | 3.141864 | 0.02226  | 0.164218 | -3.42017 |
| ENST00000655341.1 | 1.397844 | 1.762411 | 3.141765 | 0.022263 | 0.164226 | -3.42029 |

|                     |          |          |          |          |          |          |
|---------------------|----------|----------|----------|----------|----------|----------|
| lnc-TLE3-15:3       | -1.06375 | 2.022525 | -3.14164 | 0.022266 | 0.164238 | -3.42045 |
| lnc-MYO10-18:1      | 1.017391 | 5.136201 | 3.141132 | 0.02228  | 0.164303 | -3.4211  |
| lnc-PLEKHM1-10:1    | -1.28779 | 1.774111 | -3.1408  | 0.022289 | 0.164345 | -3.42153 |
| lnc-FAM103A1-3:1    | 2.53998  | 4.198452 | 3.139935 | 0.022312 | 0.164457 | -3.42263 |
| ENST00000443897.1   | 1.175373 | 1.705961 | 3.139784 | 0.022316 | 0.164473 | -3.42282 |
| ENST00000520762.1   | 1.811109 | 3.75294  | 3.139433 | 0.022326 | 0.164484 | -3.42327 |
| MSTRG.38357.1       | 1.076456 | 3.532669 | 3.139128 | 0.022334 | 0.164497 | -3.42366 |
| MSTRG.29597.1       | -1.08284 | 2.456994 | -3.13892 | 0.022339 | 0.164505 | -3.42392 |
| lnc-EFCAB2-7:1      | 1.311261 | 2.272797 | 3.138689 | 0.022346 | 0.164533 | -3.42423 |
| T086049             | 1.404552 | 3.16159  | 3.138176 | 0.02236  | 0.164568 | -3.42488 |
| MSTRG.17818.1       | 1.886391 | 2.657383 | 3.138167 | 0.02236  | 0.164568 | -3.42489 |
| NONHSAT153651.1     | 1.803516 | 3.246494 | 3.137809 | 0.02237  | 0.164615 | -3.42535 |
| MSTRG.28891.1       | -1.08279 | 2.052148 | -3.13688 | 0.022395 | 0.164752 | -3.42654 |
| lnc-TRIM13-3:1      | 1.499698 | 3.302186 | 3.136709 | 0.022399 | 0.164765 | -3.42676 |
| lnc-OR4C13-7:3      | 1.302295 | 2.344056 | 3.136647 | 0.022401 | 0.164765 | -3.42684 |
| lnc-DUSP26-6:1      | -1.63844 | 3.176028 | -3.13651 | 0.022405 | 0.164765 | -3.42701 |
| NONHSAT222020.1     | 1.310159 | 2.225376 | 3.136289 | 0.022411 | 0.164767 | -3.42729 |
| lnc-POTED-6:1       | 1.618273 | 2.469812 | 3.136257 | 0.022412 | 0.164767 | -3.42733 |
| MSTRG.52316.1       | 1.386876 | 3.340053 | 3.135652 | 0.022428 | 0.164851 | -3.42811 |
| MSTRG.21439.1       | 1.052047 | 3.508446 | 3.135557 | 0.022431 | 0.164851 | -3.42823 |
| lnc-LMBR1-11:2      | -1.49701 | 2.51643  | -3.13543 | 0.022434 | 0.164851 | -3.42839 |
| MSTRG.59591.1       | 1.286641 | 3.593535 | 3.135374 | 0.022435 | 0.164851 | -3.42846 |
| NONHSAT155757.1     | 1.082065 | 2.050149 | 3.134866 | 0.022449 | 0.164876 | -3.42911 |
| MSTRG.29096.1       | -1.16176 | 2.856658 | -3.13397 | 0.022474 | 0.164919 | -3.43025 |
| lnc-NCAM2-7:2       | 1.751496 | 2.078775 | 3.133897 | 0.022476 | 0.164919 | -3.43035 |
| lnc-MAP1LC3B2-14:26 | 1.157215 | 1.999795 | 3.133733 | 0.02248  | 0.164919 | -3.43056 |
| MSTRG.16275.1       | 1.493045 | 5.699968 | 3.133605 | 0.022483 | 0.164919 | -3.43072 |
| ENST00000457548.1   | 1.440985 | 3.37188  | 3.133605 | 0.022483 | 0.164919 | -3.43072 |
| ENST00000655836.1   | 1.723616 | 2.478806 | 3.133327 | 0.022491 | 0.164955 | -3.43108 |
| lnc-ACSL1-4:1       | 1.620174 | 1.914487 | 3.13283  | 0.022505 | 0.165018 | -3.43172 |
| MSTRG.14113.1       | 1.5505   | 3.782006 | 3.131745 | 0.022534 | 0.165151 | -3.4331  |
| NONHSAT224443.1     | 1.074724 | 2.127226 | 3.131739 | 0.022534 | 0.165151 | -3.43311 |
| NONHSAT167792.1     | 1.543815 | 2.520982 | 3.131321 | 0.022546 | 0.165199 | -3.43365 |
| ENST00000619407.4   | -1.02704 | 2.958104 | -3.13094 | 0.022556 | 0.165238 | -3.43413 |
| MSTRG.29398.1       | 1.616219 | 2.471649 | 3.130737 | 0.022562 | 0.165238 | -3.43439 |
| lnc-MRPL49-1:1      | 1.775178 | 3.152689 | 3.129854 | 0.022586 | 0.165304 | -3.43552 |
| NONHSAT175662.1     | 1.392979 | 1.815016 | 3.129787 | 0.022587 | 0.165304 | -3.43561 |
| ENST00000596207.2   | -1.32566 | 2.300884 | -3.12957 | 0.022593 | 0.165304 | -3.43588 |
| ENST00000564471.1   | -1.21302 | 3.207376 | -3.12941 | 0.022598 | 0.165304 | -3.43609 |
| lnc-JADE1-4:1       | 1.515503 | 2.908917 | 3.128701 | 0.022617 | 0.165374 | -3.437   |
| ENST00000508031.1   | -1.33204 | 1.824968 | -3.12829 | 0.022628 | 0.165397 | -3.43753 |
| lnc-XRCC2-12:2      | 1.518685 | 2.784772 | 3.127565 | 0.022648 | 0.16551  | -3.43845 |
| ENST00000445097.2   | 1.131254 | 1.742977 | 3.126909 | 0.022666 | 0.165523 | -3.43929 |
| NONHSAT185783.1     | -1.31598 | 2.572926 | -3.12691 | 0.022666 | 0.165523 | -3.43929 |
| lnc-MFSD9-9:1       | 1.702614 | 2.574809 | 3.126288 | 0.022683 | 0.165553 | -3.44009 |
| lnc-ORMDL2-4:1      | -1.04866 | 2.792917 | -3.1262  | 0.022686 | 0.165553 | -3.4402  |
| lnc-MANEA-5:2       | 1.614131 | 2.408906 | 3.126128 | 0.022688 | 0.165553 | -3.44029 |
| NONHSAT187214.1     | 1.125393 | 3.9841   | 3.126001 | 0.022691 | 0.165555 | -3.44045 |

|                   |          |          |          |          |          |          |
|-------------------|----------|----------|----------|----------|----------|----------|
| NONHSAT214556.1   | 1.590172 | 3.054741 | 3.12588  | 0.022694 | 0.165555 | -3.44061 |
| MSTRG.28644.42    | -1.27517 | 2.592495 | -3.12536 | 0.022709 | 0.165629 | -3.44128 |
| T036823           | 1.081819 | 1.582243 | 3.125088 | 0.022716 | 0.165642 | -3.44162 |
| lnc-IRS4-1:1      | 1.689992 | 2.775763 | 3.124369 | 0.022736 | 0.165762 | -3.44254 |
| lnc-HSP90B1-4:1   | -1.13224 | 3.009553 | -3.12366 | 0.022755 | 0.165844 | -3.44345 |
| ENST00000418420.1 | 1.104713 | 3.99348  | 3.12343  | 0.022762 | 0.165858 | -3.44374 |
| NONHSAT150490.1   | 1.485106 | 2.371702 | 3.123399 | 0.022763 | 0.165858 | -3.44378 |
| lnc-ATP11B-6:1    | -1.10943 | 3.710052 | -3.12331 | 0.022765 | 0.165858 | -3.4439  |
| lnc-RASGRF1-3:1   | 1.362279 | 4.203164 | 3.123295 | 0.022766 | 0.165858 | -3.44392 |
| NONHSAT179086.1   | 1.795466 | 2.975587 | 3.12294  | 0.022775 | 0.165872 | -3.44437 |
| NONHSAT180660.1   | -1.03411 | 5.047088 | -3.12279 | 0.022779 | 0.165872 | -3.44456 |
| lnc-NXPH1-3:1     | -1.04776 | 1.979666 | -3.12277 | 0.02278  | 0.165872 | -3.44459 |
| MSTRG.11972.1     | 1.402558 | 2.247898 | 3.122658 | 0.022783 | 0.165878 | -3.44473 |
| MSTRG.20414.1     | 1.799922 | 2.568657 | 3.122495 | 0.022788 | 0.165886 | -3.44494 |
| lnc-FZD4-9:1      | -1.52997 | 2.829969 | -3.12226 | 0.022794 | 0.16591  | -3.44524 |
| lnc-TMEM50B-7:4   | 1.175708 | 4.24269  | 3.122126 | 0.022798 | 0.165919 | -3.44541 |
| NONHSAT210905.1   | 1.0221   | 4.008563 | 3.12196  | 0.022802 | 0.165919 | -3.44563 |
| lnc-GDPD4-3:3     | 1.181683 | 2.090025 | 3.121781 | 0.022807 | 0.165934 | -3.44585 |
| NONHSAT153416.1   | 1.425776 | 7.561436 | 3.121546 | 0.022814 | 0.165949 | -3.44616 |
| NONHSAT162894.1   | 1.213944 | 1.985974 | 3.121069 | 0.022827 | 0.165993 | -3.44677 |
| lnc-GPR89B-11:2   | 1.861343 | 2.32038  | 3.120698 | 0.022837 | 0.16602  | -3.44724 |
| lnc-SCRN3-7:1     | -1.01032 | 2.191622 | -3.11939 | 0.022873 | 0.166162 | -3.44891 |
| NONHSAT215876.1   | 1.171357 | 2.990076 | 3.118853 | 0.022888 | 0.166199 | -3.4496  |
| ENST00000669934.1 | 1.716851 | 2.539485 | 3.11876  | 0.022891 | 0.166199 | -3.44972 |
| lnc-ECSCR-3:1     | -1.13348 | 2.646901 | -3.11855 | 0.022897 | 0.166199 | -3.45    |
| NONHSAT157933.1   | -1.09819 | 2.631317 | -3.11847 | 0.022899 | 0.166199 | -3.45009 |
| ENST00000567598.1 | 1.240029 | 7.136107 | 3.118263 | 0.022905 | 0.166199 | -3.45036 |
| lnc-TERF1-1:2     | -1.15014 | 3.135843 | -3.11818 | 0.022907 | 0.166199 | -3.45047 |
| NONHSAT221393.1   | 1.897991 | 2.298044 | 3.118118 | 0.022909 | 0.166199 | -3.45055 |
| lnc-TRAF3IP2-4:1  | -1.51547 | 3.617109 | -3.11716 | 0.022935 | 0.166247 | -3.45177 |
| MSTRG.45426.1     | -1.3182  | 2.550063 | -3.11704 | 0.022939 | 0.166247 | -3.45193 |
| lnc-VTI1A-3:1     | -1.68494 | 2.924452 | -3.11694 | 0.022941 | 0.166247 | -3.45205 |
| lnc-ALAS2-2:1     | -1.45518 | 3.215871 | -3.11596 | 0.022968 | 0.166292 | -3.45331 |
| NONHSAT212429.1   | -1.15494 | 4.53062  | -3.11587 | 0.022971 | 0.166292 | -3.45343 |
| ENST00000422609.1 | 1.500361 | 2.697191 | 3.115704 | 0.022976 | 0.166292 | -3.45364 |
| NONHSAT169556.1   | -1.30296 | 3.660424 | -3.11563 | 0.022978 | 0.166292 | -3.45373 |
| T305477           | -1.07724 | 2.601445 | -3.11561 | 0.022978 | 0.166292 | -3.45376 |
| MSTRG.72280.1     | 1.121831 | 2.16977  | 3.113959 | 0.023024 | 0.166468 | -3.45587 |
| lnc-LRGUK-5:1     | -1.29893 | 3.814562 | -3.11278 | 0.023057 | 0.166598 | -3.45739 |
| NONHSAT188147.1   | 1.461057 | 2.272946 | 3.112589 | 0.023063 | 0.166608 | -3.45763 |
| NONHSAT213978.1   | -1.40876 | 3.888285 | -3.11257 | 0.023063 | 0.166608 | -3.45766 |
| lnc-ESM1-7:1      | 1.488164 | 3.852404 | 3.111817 | 0.023084 | 0.166697 | -3.45862 |
| NONHSAT206006.1   | 1.504061 | 1.859526 | 3.111581 | 0.023091 | 0.166707 | -3.45892 |
| lnc-NMI-5:1       | 1.130668 | 4.918059 | 3.111255 | 0.0231   | 0.166707 | -3.45934 |
| lnc-KLHL1-7:1     | 1.415029 | 3.346915 | 3.11096  | 0.023108 | 0.166707 | -3.45972 |
| T223724           | -1.36065 | 2.521823 | -3.11093 | 0.023109 | 0.166707 | -3.45976 |
| NONHSAT158302.1   | 1.072623 | 1.682977 | 3.110685 | 0.023116 | 0.166715 | -3.46007 |
| NONHSAT174565.1   | 1.045827 | 2.212903 | 3.110665 | 0.023116 | 0.166715 | -3.4601  |

|                   |          |          |          |          |          |          |
|-------------------|----------|----------|----------|----------|----------|----------|
| lnc-AUH-2:9       | 1.119537 | 3.911792 | 3.110498 | 0.023121 | 0.166737 | -3.46031 |
| lnc-TRIM49B-1:1   | 1.328671 | 2.236949 | 3.109362 | 0.023153 | 0.166871 | -3.46177 |
| ENST00000657788.1 | -1.56846 | 2.611005 | -3.10907 | 0.023161 | 0.166893 | -3.46214 |
| NONHSAT189214.1   | 1.686391 | 3.399006 | 3.108951 | 0.023164 | 0.166893 | -3.46229 |
| NONHSAT208046.1   | 1.047175 | 2.01057  | 3.108844 | 0.023167 | 0.166893 | -3.46243 |
| MSTRG.63755.1     | 1.291726 | 2.27055  | 3.108044 | 0.02319  | 0.166978 | -3.46346 |
| NONHSAT187168.1   | 1.031754 | 4.172279 | 3.108017 | 0.023191 | 0.166978 | -3.46349 |
| lnc-STK26-6:1     | 1.235496 | 4.347872 | 3.107954 | 0.023192 | 0.166978 | -3.46357 |
| lnc-CDH26-2:1     | 1.341895 | 1.932326 | 3.107488 | 0.023206 | 0.167024 | -3.46417 |
| ENST00000660073.1 | 1.194577 | 1.727555 | 3.107358 | 0.023209 | 0.167037 | -3.46434 |
| NONHSAT206905.1   | 1.215431 | 2.544701 | 3.107245 | 0.023212 | 0.167037 | -3.46448 |
| ENST00000443744.2 | -1.39785 | 3.827515 | -3.10669 | 0.023228 | 0.1671   | -3.46519 |
| NONHSAT223531.1   | -1.32972 | 2.123199 | -3.10664 | 0.023229 | 0.1671   | -3.46526 |
| lnc-SLITRK6-13:1  | 1.306523 | 2.524927 | 3.10634  | 0.023238 | 0.167149 | -3.46564 |
| NONHSAT208493.1   | 1.126685 | 1.644486 | 3.105752 | 0.023254 | 0.167232 | -3.4664  |
| NONHSAT211111.1   | 1.316116 | 2.217907 | 3.105339 | 0.023266 | 0.167292 | -3.46693 |
| NONHSAT217573.1   | -1.05203 | 2.523657 | -3.10488 | 0.023279 | 0.167292 | -3.46751 |
| lnc-KLF4-2:1      | -1.23702 | 2.54941  | -3.10446 | 0.023291 | 0.167292 | -3.46805 |
| NONHSAT211139.1   | 1.003411 | 3.725492 | 3.103967 | 0.023305 | 0.167325 | -3.46869 |
| T068170           | 1.31245  | 2.238952 | 3.103172 | 0.023327 | 0.167413 | -3.46971 |
| MSTRG.20718.1     | -1.49467 | 3.707585 | -3.10296 | 0.023333 | 0.167426 | -3.46997 |
| lnc-WDR89-3:1     | -1.34488 | 3.322445 | -3.10282 | 0.023337 | 0.167426 | -3.47016 |
| NR_029429         | -1.24486 | 3.18512  | -3.10211 | 0.023357 | 0.16754  | -3.47107 |
| lnc-ANKRD20A3-7:1 | 1.112162 | 4.330424 | 3.100904 | 0.023392 | 0.16768  | -3.47261 |
| ENST00000552015.1 | -1.20286 | 4.424809 | -3.10033 | 0.023408 | 0.167772 | -3.47335 |
| NONHSAT186984.1   | 1.103729 | 2.798227 | 3.099627 | 0.023428 | 0.167833 | -3.47425 |
| NONHSAT171502.1   | 1.267872 | 2.313992 | 3.099335 | 0.023436 | 0.167855 | -3.47463 |
| MSTRG.40412.1     | 1.613541 | 2.499418 | 3.097684 | 0.023483 | 0.168122 | -3.47675 |
| MSTRG.67175.1     | -1.25142 | 2.96138  | -3.09732 | 0.023494 | 0.168154 | -3.47722 |
| lnc-PACRGL-10:1   | 1.306269 | 2.4558   | 3.096983 | 0.023503 | 0.168163 | -3.47765 |
| NONHSAT218753.1   | 1.687064 | 2.337849 | 3.096694 | 0.023511 | 0.168176 | -3.47802 |
| ENST00000609422.1 | -1.35839 | 2.221387 | -3.09624 | 0.023524 | 0.168208 | -3.4786  |
| NONHSAT210660.1   | 1.730529 | 3.100968 | 3.096065 | 0.023529 | 0.168214 | -3.47883 |
| NONHSAT177274.1   | 1.05205  | 4.529681 | 3.095886 | 0.023534 | 0.168232 | -3.47906 |
| NONHSAT185100.1   | 1.005955 | 1.869138 | 3.095441 | 0.023547 | 0.168242 | -3.47963 |
| MSTRG.33075.1     | 1.321395 | 2.20639  | 3.095423 | 0.023548 | 0.168242 | -3.47965 |
| lnc-RAB6C-9:1     | -1.37517 | 2.596562 | -3.09539 | 0.023549 | 0.168242 | -3.47969 |
| NONHSAT168011.1   | 1.223481 | 8.961171 | 3.095132 | 0.023556 | 0.16826  | -3.48002 |
| lnc-ABHD17C-1:1   | 1.028949 | 1.914381 | 3.094546 | 0.023573 | 0.168281 | -3.48078 |
| NONHSAT194908.1   | 1.67752  | 2.527507 | 3.093889 | 0.023592 | 0.168336 | -3.48162 |
| NONHSAT154834.1   | -1.11294 | 4.411064 | -3.09285 | 0.023621 | 0.168429 | -3.48295 |
| ENST00000564492.1 | 1.598974 | 2.866732 | 3.092435 | 0.023633 | 0.168459 | -3.48349 |
| NONHSAT183014.1   | 1.204308 | 3.219451 | 3.092301 | 0.023637 | 0.168459 | -3.48366 |
| lnc-NUDT21-1:1    | -1.39101 | 2.497906 | -3.09219 | 0.02364  | 0.168469 | -3.4838  |
| MSTRG.789.1       | 1.555535 | 5.953189 | 3.091808 | 0.023651 | 0.168524 | -3.48429 |
| NONHSAT166031.1   | -1.05058 | 2.193055 | -3.09167 | 0.023655 | 0.16854  | -3.48447 |
| NONHSAT170664.1   | 1.927784 | 4.182325 | 3.091485 | 0.023661 | 0.168554 | -3.48471 |
| NONHSAT156183.1   | 1.210244 | 3.690146 | 3.090733 | 0.023682 | 0.168608 | -3.48567 |

|                   |          |          |          |          |          |          |
|-------------------|----------|----------|----------|----------|----------|----------|
| NONHSAT198813.1   | 1.576589 | 2.960932 | 3.090627 | 0.023685 | 0.168608 | -3.48581 |
| lnc-LONRF1-7:1    | 1.146141 | 2.215677 | 3.08938  | 0.023721 | 0.168736 | -3.48741 |
| lnc-SPOPL-8:1     | -1.28594 | 1.747545 | -3.0892  | 0.023726 | 0.168736 | -3.48764 |
| ENST00000606818.1 | 1.492314 | 2.780074 | 3.088796 | 0.023738 | 0.168748 | -3.48816 |
| MSTRG.58046.1     | 1.440775 | 2.514016 | 3.088227 | 0.023754 | 0.168841 | -3.48889 |
| MSTRG.9267.1      | -1.38377 | 2.939961 | -3.08652 | 0.023804 | 0.169029 | -3.49108 |
| lnc-SLC1A2-4:1    | 1.216462 | 2.739633 | 3.086441 | 0.023806 | 0.169029 | -3.49119 |
| lnc-OTP-2:1       | -1.02867 | 5.208224 | -3.08576 | 0.023826 | 0.169084 | -3.49206 |
| ENST00000661594.1 | 1.209513 | 2.446621 | 3.085654 | 0.023829 | 0.169084 | -3.4922  |
| lnc-COL11A1-3:1   | 1.127294 | 1.641821 | 3.085276 | 0.02384  | 0.169098 | -3.49269 |
| lnc-SBNO1-2:1     | 1.609751 | 4.33362  | 3.085192 | 0.023842 | 0.169098 | -3.49279 |
| LINC01687:15      | 1.068808 | 4.609377 | 3.084798 | 0.023854 | 0.169129 | -3.4933  |
| lnc-SBDS-23:1     | -1.05951 | 2.535469 | -3.08446 | 0.023864 | 0.169176 | -3.49374 |
| NONHSAT189680.1   | -1.08209 | 3.602761 | -3.08333 | 0.023896 | 0.169312 | -3.49518 |
| NONHSAT153641.1   | 1.031086 | 3.197539 | 3.083317 | 0.023897 | 0.169312 | -3.4952  |
| lnc-TMED5-5:1     | -1.6126  | 2.316217 | -3.08319 | 0.0239   | 0.169312 | -3.49537 |
| MSTRG.34072.1     | -1.18051 | 2.397407 | -3.08313 | 0.023902 | 0.169312 | -3.49545 |
| lnc-TMEM98-1:5    | -1.06904 | 2.054362 | -3.08285 | 0.02391  | 0.169312 | -3.49581 |
| lnc-ITGA5-1:1     | -1.25704 | 3.203269 | -3.08205 | 0.023933 | 0.169422 | -3.49683 |
| NONHSAT177883.1   | 1.328389 | 5.472529 | 3.08172  | 0.023943 | 0.169458 | -3.49726 |
| NONHSAT161671.1   | -1.39975 | 2.769743 | -3.08144 | 0.023951 | 0.169463 | -3.49762 |
| NONHSAT168915.1   | 1.839078 | 3.526517 | 3.081418 | 0.023952 | 0.169463 | -3.49765 |
| lnc-BRF1-50:1     | 1.64275  | 2.221192 | 3.07953  | 0.024007 | 0.169691 | -3.50007 |
| lnc-ARHGEF7-6:1   | 1.297901 | 2.865213 | 3.079364 | 0.024012 | 0.169699 | -3.50029 |
| NONHSAT202213.1   | -1.33664 | 2.937043 | -3.07932 | 0.024013 | 0.169699 | -3.50035 |
| NONHSAT223781.1   | 1.196963 | 2.275856 | 3.078242 | 0.024045 | 0.169779 | -3.50173 |
| NONHSAT193204.1   | 1.539877 | 2.425588 | 3.078124 | 0.024048 | 0.169779 | -3.50188 |
| NONHSAT174522.1   | 2.12133  | 3.72321  | 3.077609 | 0.024063 | 0.169825 | -3.50254 |
| NONHSAT207683.1   | 1.366938 | 2.229127 | 3.076162 | 0.024105 | 0.169971 | -3.5044  |
| MSTRG.66537.1     | -1.72456 | 3.022176 | -3.07571 | 0.024119 | 0.169991 | -3.50499 |
| ENST00000502668.2 | 1.853611 | 5.968382 | 3.075488 | 0.024125 | 0.170005 | -3.50527 |
| NONHSAT171291.1   | 1.323697 | 1.74871  | 3.075235 | 0.024133 | 0.170032 | -3.5056  |
| MSTRG.34440.1     | 1.541017 | 2.955001 | 3.075106 | 0.024136 | 0.170047 | -3.50576 |
| NONHSAT205027.1   | 1.409451 | 2.224716 | 3.074807 | 0.024145 | 0.17008  | -3.50615 |
| NONHSAT222335.1   | -1.41091 | 6.999551 | -3.07379 | 0.024175 | 0.170184 | -3.50745 |
| ENST00000597028.1 | -1.19254 | 3.060864 | -3.07371 | 0.024177 | 0.170184 | -3.50755 |
| MSTRG.33022.1     | -1.93563 | 2.657408 | -3.07178 | 0.024234 | 0.170351 | -3.51004 |
| MSTRG.51151.6     | 1.494269 | 1.846647 | 3.07166  | 0.024238 | 0.170351 | -3.5102  |
| NONHSAT181341.1   | 1.488256 | 2.846501 | 3.071656 | 0.024238 | 0.170351 | -3.5102  |
| NONHSAT166019.1   | 1.193658 | 2.139751 | 3.071527 | 0.024242 | 0.170351 | -3.51037 |
| ENST00000671082.1 | 1.052024 | 2.071653 | 3.071464 | 0.024244 | 0.170351 | -3.51045 |
| T132814           | 1.243388 | 2.210424 | 3.070925 | 0.02426  | 0.170393 | -3.51114 |
| lnc-FBXW11-8:1    | 1.711506 | 7.261239 | 3.070574 | 0.02427  | 0.170407 | -3.5116  |
| lnc-ARAP2-11:1    | 1.374077 | 3.996505 | 3.070399 | 0.024275 | 0.170417 | -3.51182 |
| lnc-DENND3-7:1    | 1.030074 | 4.674121 | 3.069843 | 0.024292 | 0.17048  | -3.51254 |
| NBAT1:11          | -1.45356 | 2.702295 | -3.06963 | 0.024298 | 0.170493 | -3.51281 |
| ENST00000523121.1 | 1.230453 | 2.044871 | 3.069383 | 0.024305 | 0.170504 | -3.51313 |
| lnc-MAX-8:1       | 1.088569 | 1.603085 | 3.069291 | 0.024308 | 0.170504 | -3.51325 |



|                   |          |          |          |          |          |          |
|-------------------|----------|----------|----------|----------|----------|----------|
| lnc-TAB3-2:1      | 1.213671 | 2.00713  | 3.067375 | 0.024365 | 0.170694 | -3.51571 |
| NONHSAT170325.1   | 1.748412 | 3.069796 | 3.067361 | 0.024365 | 0.170694 | -3.51573 |
| ENST00000668987.1 | 1.002144 | 9.089447 | 3.067172 | 0.024371 | 0.170694 | -3.51598 |
| NONHSAT216194.1   | 1.622761 | 3.100545 | 3.067164 | 0.024371 | 0.170694 | -3.51599 |
| MSTRG.48593.1     | -1.44361 | 2.245571 | -3.06673 | 0.024384 | 0.170705 | -3.51654 |
| NONHSAT158414.1   | 1.245606 | 3.445928 | 3.066413 | 0.024393 | 0.170747 | -3.51695 |
| lnc-DNASE1L3-3:1  | -2.19665 | 3.648014 | -3.06605 | 0.024404 | 0.1708   | -3.51743 |
| ENST00000420865.6 | 1.824034 | 1.971183 | 3.06526  | 0.024428 | 0.170928 | -3.51844 |
| MSTRG.54168.1     | 1.550583 | 2.817459 | 3.064354 | 0.024455 | 0.170989 | -3.5196  |
| MSTRG.39770.1     | 1.595028 | 2.349149 | 3.064141 | 0.024461 | 0.170989 | -3.51988 |
| MSTRG.70427.1     | -1.16042 | 4.297193 | -3.06397 | 0.024466 | 0.170989 | -3.5201  |
| NONHSAT181208.1   | 1.260499 | 1.737927 | 3.063954 | 0.024467 | 0.170989 | -3.52012 |
| lnc-IGSF10-8:1    | -1.08295 | 3.578236 | -3.06395 | 0.024467 | 0.170989 | -3.52012 |
| LINC02384:41      | 1.237065 | 2.455333 | 3.06395  | 0.024467 | 0.170989 | -3.52013 |
| lnc-BCL2L15-2:1   | -1.09089 | 3.860538 | -3.06388 | 0.024469 | 0.170989 | -3.52021 |
| ENST00000657182.1 | 1.161513 | 1.615004 | 3.063535 | 0.024479 | 0.171022 | -3.52066 |
| NONHSAT206808.1   | -1.04865 | 2.200049 | -3.06349 | 0.02448  | 0.171022 | -3.52071 |
| NONHSAT197711.1   | -1.21471 | 2.801498 | -3.06334 | 0.024485 | 0.171022 | -3.5209  |
| lnc-OCA2-6:1      | 1.918021 | 2.602051 | 3.063133 | 0.024491 | 0.171027 | -3.52118 |
| lnc-C1orf115-1:1  | -1.23694 | 2.37157  | -3.06279 | 0.024501 | 0.17104  | -3.52162 |
| ENST00000519550.1 | 1.486155 | 2.106427 | 3.062242 | 0.024518 | 0.171116 | -3.52232 |
| T049910           | 1.476998 | 1.907118 | 3.061541 | 0.024539 | 0.171205 | -3.52323 |
| lnc-BMP6-16:1     | 1.06234  | 1.99606  | 3.061378 | 0.024544 | 0.171227 | -3.52344 |
| ENST00000449895.5 | -1.03315 | 2.37342  | -3.06038 | 0.024573 | 0.171376 | -3.52472 |
| NONHSAT164553.1   | 1.218124 | 2.066695 | 3.059544 | 0.024598 | 0.171487 | -3.5258  |
| lnc-OR10X1-1:1    | 1.187041 | 2.536789 | 3.059534 | 0.024599 | 0.171487 | -3.52581 |
| lnc-PDK3-8:1      | -1.44686 | 3.438161 | -3.05923 | 0.024608 | 0.171519 | -3.5262  |
| lnc-SLF1-8:1      | 1.242241 | 3.646426 | 3.058082 | 0.024642 | 0.171612 | -3.52769 |
| NONHSAT218556.1   | 1.386581 | 2.212304 | 3.057613 | 0.024656 | 0.171659 | -3.52829 |
| NONHSAT210756.1   | -1.04091 | 2.737375 | -3.05714 | 0.024671 | 0.17169  | -3.5289  |
| NONHSAT192059.1   | 1.554436 | 2.042817 | 3.057044 | 0.024674 | 0.17169  | -3.52902 |
| lnc-LHFPL2-2:1    | -1.37202 | 2.30302  | -3.05702 | 0.024674 | 0.17169  | -3.52906 |
| T210151           | 1.054923 | 3.42767  | 3.056817 | 0.02468  | 0.171695 | -3.52932 |
| NR_111906         | -1.02501 | 3.069734 | -3.05659 | 0.024687 | 0.171711 | -3.52961 |
| NONHSAT198524.1   | 1.187797 | 2.765274 | 3.056146 | 0.024701 | 0.171753 | -3.53018 |
| MSTRG.28361.3     | 1.385791 | 2.404671 | 3.055878 | 0.024709 | 0.171786 | -3.53053 |
| NONHSAT220074.1   | -1.89417 | 2.542113 | -3.05587 | 0.024709 | 0.171786 | -3.53053 |
| lnc-CNOT8-1:1     | 1.178156 | 2.73109  | 3.055788 | 0.024711 | 0.171793 | -3.53064 |
| ENST00000648961.1 | 1.403204 | 3.379364 | 3.054606 | 0.024747 | 0.171945 | -3.53217 |
| T279692           | 1.080562 | 2.096715 | 3.054281 | 0.024757 | 0.171945 | -3.53259 |
| NONHSAT151124.1   | 1.706017 | 1.950779 | 3.054193 | 0.02476  | 0.171945 | -3.5327  |
| NONHSAT222110.1   | 1.438554 | 2.755587 | 3.053814 | 0.024771 | 0.171989 | -3.53319 |
| lnc-ITGB3BP-11:1  | -1.27824 | 3.790414 | -3.05367 | 0.024775 | 0.171989 | -3.53337 |
| ENST00000659117.1 | -1.55822 | 4.037767 | -3.05312 | 0.024792 | 0.172033 | -3.53408 |
| ENST00000654363.1 | 1.493998 | 8.65842  | 3.053018 | 0.024795 | 0.172042 | -3.53421 |
| NONHSAT149190.1   | 1.328803 | 2.714132 | 3.052767 | 0.024803 | 0.172065 | -3.53454 |
| ENST00000648756.1 | 1.015937 | 11.52133 | 3.05251  | 0.024811 | 0.17209  | -3.53487 |
| NONHSAT205229.1   | 1.421252 | 2.398038 | 3.052227 | 0.024819 | 0.17209  | -3.53523 |

|                   |          |          |          |          |          |          |
|-------------------|----------|----------|----------|----------|----------|----------|
| MSTRG.61489.1     | -1.35597 | 2.010644 | -3.05217 | 0.024821 | 0.17209  | -3.53531 |
| lnc-NBN-5:1       | -1.06367 | 3.264627 | -3.05154 | 0.02484  | 0.172171 | -3.53612 |
| NONHSAT170347.1   | 1.022826 | 4.204656 | 3.051504 | 0.024841 | 0.172171 | -3.53617 |
| lnc-TMEM43-3:2    | 1.532088 | 3.350475 | 3.050676 | 0.024866 | 0.172309 | -3.53723 |
| NONHSAT167717.1   | -1.2769  | 1.75597  | -3.05007 | 0.024885 | 0.172346 | -3.53802 |
| lnc-TMC6-1:1      | 1.979166 | 2.925946 | 3.049566 | 0.0249   | 0.172389 | -3.53867 |
| NONHSAT162359.1   | 1.621142 | 2.924488 | 3.04928  | 0.024909 | 0.172414 | -3.53903 |
| NONHSAT172479.1   | 1.309314 | 3.759176 | 3.049103 | 0.024914 | 0.172439 | -3.53926 |
| lnc-GPD2-4:1      | 1.003405 | 4.18224  | 3.04893  | 0.024919 | 0.172445 | -3.53949 |
| NONHSAT171706.1   | -1.27439 | 3.230306 | -3.0487  | 0.024926 | 0.172453 | -3.53978 |
| MSTRG.29681.1     | 1.104129 | 1.917134 | 3.04734  | 0.024968 | 0.172617 | -3.54154 |
| NONHSAT202366.1   | -1.31723 | 2.618848 | -3.04613 | 0.025005 | 0.172757 | -3.5431  |
| lnc-MBTPS2-1:1    | 1.093614 | 4.780834 | 3.044718 | 0.025048 | 0.172962 | -3.54492 |
| lnc-GOLGA4-3:2    | -1.21164 | 2.235743 | -3.04418 | 0.025064 | 0.173004 | -3.54561 |
| NONHSAT160999.1   | 1.462677 | 2.355636 | 3.042946 | 0.025102 | 0.173135 | -3.54721 |
| NONHSAT192529.1   | 1.68046  | 2.947355 | 3.04243  | 0.025118 | 0.17322  | -3.54787 |
| MSTRG.60180.12    | -1.01117 | 4.020636 | -3.04211 | 0.025128 | 0.173265 | -3.54829 |
| NONHSAT170418.1   | 1.346324 | 1.719585 | 3.04204  | 0.02513  | 0.173268 | -3.54838 |
| ENST00000664362.1 | 1.667465 | 3.22797  | 3.041328 | 0.025152 | 0.173366 | -3.5493  |
| MSTRG.45322.1     | 1.256401 | 6.273185 | 3.041042 | 0.02516  | 0.173403 | -3.54967 |
| lnc-OFD1-3:1      | 1.054532 | 1.583329 | 3.040394 | 0.02518  | 0.173474 | -3.5505  |
| MSTRG.4614.16     | -1.33703 | 2.705063 | -3.04004 | 0.025191 | 0.173497 | -3.55096 |
| ENST00000649888.1 | 1.229366 | 1.976703 | 3.040009 | 0.025192 | 0.173497 | -3.551   |
| lnc-MPP2-1:3      | 1.43187  | 2.27989  | 3.039803 | 0.025199 | 0.173505 | -3.55127 |
| NONHSAT178822.1   | 1.128344 | 2.034086 | 3.039645 | 0.025203 | 0.173514 | -3.55147 |
| NONHSAT167482.1   | 1.35022  | 4.12745  | 3.039476 | 0.025209 | 0.173528 | -3.55169 |
| MSTRG.34306.1     | 1.913406 | 2.924527 | 3.039358 | 0.025212 | 0.17354  | -3.55184 |
| NONHSAT218810.1   | 1.796986 | 2.002266 | 3.037602 | 0.025267 | 0.173699 | -3.55411 |
| NONHSAT157725.1   | 1.483912 | 2.644384 | 3.03734  | 0.025275 | 0.173743 | -3.55445 |
| lnc-PLEKHH2-5:2   | -1.21397 | 3.387115 | -3.03655 | 0.025299 | 0.173853 | -3.55546 |
| lnc-NTF3-4:1      | 1.319971 | 2.73644  | 3.036545 | 0.025299 | 0.173853 | -3.55547 |
| NONHSAT210302.1   | -1.08038 | 4.281831 | -3.03642 | 0.025303 | 0.173868 | -3.55564 |
| lnc-LIPG-6:1      | -1.07856 | 5.157346 | -3.03577 | 0.025323 | 0.173936 | -3.55648 |
| lnc-GGN-4:1       | -1.99156 | 3.965871 | -3.03407 | 0.025376 | 0.174182 | -3.55867 |
| NONHSAT156088.1   | 1.184842 | 2.583888 | 3.034064 | 0.025376 | 0.174182 | -3.55868 |
| NONHSAT162008.1   | 1.634284 | 2.847281 | 3.03367  | 0.025388 | 0.174215 | -3.55919 |
| lnc-PPP1R3D-8:1   | -1.38583 | 2.366883 | -3.03312 | 0.025405 | 0.174278 | -3.5599  |
| NONHSAT219928.1   | 1.526773 | 2.306055 | 3.032968 | 0.02541  | 0.174278 | -3.56009 |
| ENST00000458063.1 | 1.218505 | 3.978971 | 3.031716 | 0.025449 | 0.174398 | -3.56171 |
| lnc-GGPS1-15:2    | -1.34733 | 2.542434 | -3.0317  | 0.025449 | 0.174398 | -3.56173 |
| lnc-INHBB-2:1     | 1.096003 | 3.060453 | 3.031573 | 0.025454 | 0.174414 | -3.5619  |
| NONHSAT161257.1   | -1.09472 | 3.349617 | -3.02986 | 0.025507 | 0.174673 | -3.56411 |
| NONHSAT179780.1   | 1.513459 | 2.866981 | 3.029312 | 0.025524 | 0.174723 | -3.56482 |
| MSTRG.15587.1     | 1.101618 | 2.377288 | 3.02925  | 0.025526 | 0.174723 | -3.5649  |
| ENST00000667827.1 | -1.47801 | 2.804118 | -3.02924 | 0.025526 | 0.174723 | -3.56491 |
| T302771           | -1.33556 | 3.4774   | -3.0287  | 0.025543 | 0.174767 | -3.56561 |
| NONHSAT187216.1   | -1.01381 | 3.08053  | -3.02833 | 0.025555 | 0.174788 | -3.56609 |
| ENST00000420237.1 | 1.586572 | 2.965566 | 3.028004 | 0.025565 | 0.174816 | -3.56651 |

|                   |          |          |          |          |          |          |
|-------------------|----------|----------|----------|----------|----------|----------|
| NONHSAT222288.1   | 1.110247 | 1.847745 | 3.027944 | 0.025567 | 0.174816 | -3.56659 |
| NONHSAT222083.1   | -1.06253 | 4.117361 | -3.02753 | 0.02558  | 0.174848 | -3.56712 |
| MSTRG.1729.22     | 1.527298 | 3.936185 | 3.027045 | 0.025595 | 0.174914 | -3.56775 |
| LINC02348:14      | 1.11356  | 2.913065 | 3.026417 | 0.025615 | 0.174947 | -3.56856 |
| MSTRG.11905.1     | 1.235885 | 8.009674 | 3.026324 | 0.025618 | 0.174947 | -3.56868 |
| lnc-EBF3-15:1     | 2.083905 | 3.482411 | 3.02593  | 0.02563  | 0.174947 | -3.56919 |
| lnc-HIST1H2AH-2:1 | 1.463176 | 4.553558 | 3.025867 | 0.025632 | 0.174947 | -3.56927 |
| ENST00000658546.1 | 1.30779  | 1.897213 | 3.02393  | 0.025693 | 0.17518  | -3.57178 |
| NONHSAT173652.1   | -1.14915 | 3.353714 | -3.02377 | 0.025698 | 0.17518  | -3.57198 |
| NONHSAT169970.1   | -1.20434 | 3.068288 | -3.02362 | 0.025703 | 0.17518  | -3.57218 |
| MSTRG.9529.1      | -1.08583 | 3.053496 | -3.02179 | 0.02576  | 0.175357 | -3.57454 |
| T103473           | -1.17441 | 3.247819 | -3.02129 | 0.025776 | 0.175396 | -3.57519 |
| NONHSAT164702.1   | 1.024157 | 4.134621 | 3.020949 | 0.025787 | 0.175435 | -3.57563 |
| NONHSAT176788.1   | 1.76697  | 2.199643 | 3.020609 | 0.025798 | 0.175472 | -3.57607 |
| MSTRG.34927.1     | -1.55927 | 2.362403 | -3.02027 | 0.025808 | 0.175476 | -3.5765  |
| MSTRG.56306.1     | -1.02343 | 4.048597 | -3.02012 | 0.025813 | 0.175476 | -3.5767  |
| lnc-FECH-4:2      | -1.1716  | 2.927747 | -3.02003 | 0.025816 | 0.175476 | -3.57682 |
| NONHSAT167325.1   | 1.20538  | 2.813128 | 3.019752 | 0.025825 | 0.175476 | -3.57718 |
| MSTRG.39762.1     | 1.583726 | 3.293007 | 3.019711 | 0.025826 | 0.175476 | -3.57723 |
| NONHSAT197678.1   | 1.659884 | 7.54325  | 3.019603 | 0.025829 | 0.175487 | -3.57737 |
| MSTRG.36189.1     | 1.198762 | 3.688888 | 3.01914  | 0.025844 | 0.175563 | -3.57797 |
| lnc-ZNF727-3:1    | 1.024228 | 3.849541 | 3.018727 | 0.025857 | 0.175593 | -3.57851 |
| NONHSAT197131.1   | 1.635596 | 3.674596 | 3.018565 | 0.025862 | 0.175616 | -3.57872 |
| T254246           | 1.163222 | 4.240549 | 3.017778 | 0.025887 | 0.175746 | -3.57973 |
| NONHSAT218146.1   | 1.110886 | 3.487737 | 3.017269 | 0.025903 | 0.175812 | -3.58039 |
| lnc-CEACAM19-2:1  | -1.35195 | 2.565823 | -3.01701 | 0.025912 | 0.175818 | -3.58072 |
| MSTRG.38435.1     | -1.4616  | 2.613108 | -3.0158  | 0.02595  | 0.175914 | -3.5823  |
| NONHSAT174356.1   | 1.116827 | 3.885149 | 3.015043 | 0.025974 | 0.175974 | -3.58327 |
| NONHSAT201267.1   | -1.52956 | 3.394014 | -3.01497 | 0.025977 | 0.175974 | -3.58337 |
| NONHSAT154209.1   | 1.570996 | 2.931477 | 3.014278 | 0.025999 | 0.176051 | -3.58426 |
| lnc-DEGS1-2:1     | -1.69265 | 3.711637 | -3.01419 | 0.026001 | 0.176051 | -3.58438 |
| lnc-EML4-3:1      | -1.15537 | 1.834301 | -3.01298 | 0.02604  | 0.176194 | -3.58594 |
| NONHSAT221834.1   | -1.26059 | 2.92305  | -3.01264 | 0.026051 | 0.176217 | -3.58639 |
| T298308           | -1.39337 | 2.635636 | -3.0126  | 0.026052 | 0.176217 | -3.58644 |
| lnc-SF3B1-3:1     | 1.400234 | 2.103486 | 3.01197  | 0.026072 | 0.17627  | -3.58725 |
| NONHSAT160228.1   | 1.354404 | 5.39064  | 3.010423 | 0.026122 | 0.17644  | -3.58925 |
| lnc-FAM208B-1:1   | 1.716413 | 2.214569 | 3.010094 | 0.026132 | 0.176475 | -3.58968 |
| lnc-ALDH3A2-7:1   | 1.118176 | 5.358584 | 3.009364 | 0.026156 | 0.176559 | -3.59063 |
| NONHSAT158928.1   | -1.11708 | 3.398991 | -3.00788 | 0.026204 | 0.176752 | -3.59255 |
| lnc-KIAA2013-6:1  | -1.23789 | 2.079741 | -3.00755 | 0.026214 | 0.176789 | -3.59297 |
| MSTRG.64653.1     | 1.297304 | 4.616604 | 3.00673  | 0.02624  | 0.176867 | -3.59404 |
| MSTRG.34778.1     | 1.219893 | 1.894426 | 3.006601 | 0.026245 | 0.176867 | -3.5942  |
| ENST00000670865.1 | 1.384042 | 3.054782 | 3.00642  | 0.02625  | 0.176867 | -3.59444 |
| NONHSAT210656.1   | 1.776757 | 3.152668 | 3.006363 | 0.026252 | 0.176867 | -3.59451 |
| NONHSAT208397.1   | 1.341587 | 2.10455  | 3.006004 | 0.026264 | 0.176884 | -3.59498 |
| T119156           | -1.01243 | 1.859929 | -3.00591 | 0.026267 | 0.176884 | -3.5951  |
| lnc-CARHSP1-4:1   | -1.09327 | 5.178346 | -3.00591 | 0.026267 | 0.176884 | -3.5951  |
| ENST00000457890.1 | 1.112054 | 1.969769 | 3.005733 | 0.026273 | 0.176889 | -3.59533 |

|                   |          |          |          |          |          |          |
|-------------------|----------|----------|----------|----------|----------|----------|
| MSTRG.45998.1     | 1.418644 | 1.786455 | 3.005095 | 0.026293 | 0.176956 | -3.59616 |
| MSTRG.19827.14    | 1.049334 | 1.602802 | 3.004902 | 0.026299 | 0.176956 | -3.59641 |
| ENST00000548901.1 | -1.07508 | 3.570539 | -3.00486 | 0.026301 | 0.176956 | -3.59646 |
| ENST00000499765.2 | -1.09751 | 4.789211 | -3.00472 | 0.026305 | 0.176956 | -3.59664 |
| lnc-PPIAL4F-3:5   | 1.004739 | 3.252924 | 3.004143 | 0.026324 | 0.176973 | -3.59739 |
| ENST00000654979.1 | -1.07585 | 5.163009 | -3.00359 | 0.026342 | 0.177002 | -3.59811 |
| NONHSAT173590.1   | 1.233678 | 1.723665 | 3.002623 | 0.026373 | 0.17714  | -3.59936 |
| lnc-DAPK2-3:2     | -1.13944 | 3.907547 | -3.00231 | 0.026383 | 0.177184 | -3.59976 |
| NONHSAT175562.1   | 1.950567 | 2.53372  | 3.00196  | 0.026395 | 0.177215 | -3.60022 |
| ENST00000567851.5 | -1.13892 | 3.739194 | -3.00173 | 0.026402 | 0.177234 | -3.60052 |
| ENST00000653421.1 | -1.27351 | 3.236048 | -3.00154 | 0.026408 | 0.177247 | -3.60077 |
| lnc-ZNF521-3:1    | -1.1424  | 2.281566 | -3.00094 | 0.026428 | 0.177317 | -3.60154 |
| NONHSAT158629.1   | 1.287256 | 2.587785 | 3.000499 | 0.026442 | 0.17739  | -3.60211 |
| MSTRG.5095.1      | 1.597812 | 2.854435 | 2.999822 | 0.026464 | 0.177491 | -3.60299 |
| NONHSAT187552.1   | 1.778559 | 3.690381 | 2.999324 | 0.02648  | 0.177534 | -3.60363 |
| lnc-DRD1-2:1      | -1.09452 | 2.918471 | -2.99929 | 0.026481 | 0.177534 | -3.60368 |
| NONHSAT179288.1   | 2.212102 | 3.292664 | 2.998589 | 0.026504 | 0.177611 | -3.60459 |
| lnc-SH3GL3-3:1    | -1.71371 | 2.461523 | -2.99822 | 0.026516 | 0.177661 | -3.60506 |
| T285360           | 1.942258 | 3.357656 | 2.998122 | 0.026519 | 0.177661 | -3.60519 |
| lnc-RLF-2:1       | 1.086217 | 2.201031 | 2.997918 | 0.026526 | 0.177663 | -3.60546 |
| NONHSAT158876.1   | 1.478697 | 5.011047 | 2.997581 | 0.026537 | 0.177705 | -3.60589 |
| NONHSAT219183.1   | -1.00169 | 1.851404 | -2.99744 | 0.026542 | 0.177705 | -3.60608 |
| lnc-DHRS7-4:1     | -1.23707 | 3.722726 | -2.99727 | 0.026547 | 0.177716 | -3.60629 |
| NONHSAT179531.1   | 1.010858 | 7.534978 | 2.996598 | 0.026569 | 0.177805 | -3.60717 |
| lnc-KSR1-3:3      | -1.03418 | 2.053167 | -2.99612 | 0.026585 | 0.177887 | -3.60779 |
| ENST00000560647.5 | -1.02305 | 2.007006 | -2.9959  | 0.026592 | 0.177896 | -3.60808 |
| MSTRG.1520.1      | 1.050109 | 6.445113 | 2.993939 | 0.026656 | 0.178041 | -3.61062 |
| NONHSAT197169.1   | 1.60939  | 2.953919 | 2.993855 | 0.026659 | 0.178041 | -3.61073 |
| MSTRG.45987.1     | -1.05361 | 1.727301 | -2.9925  | 0.026703 | 0.178158 | -3.61248 |
| lnc-PPA2-5:1      | -1.51535 | 3.516901 | -2.99244 | 0.026705 | 0.178158 | -3.61256 |
| NONHSAT191693.1   | 1.220256 | 2.588479 | 2.992116 | 0.026716 | 0.17818  | -3.61298 |
| NONHSAT154670.1   | -1.26639 | 3.488315 | -2.99152 | 0.026735 | 0.178261 | -3.61375 |
| ENST00000464382.2 | 1.185245 | 2.381613 | 2.990596 | 0.026766 | 0.178314 | -3.61495 |
| lnc-DOCK7-8:1     | 1.533344 | 2.956988 | 2.988933 | 0.026821 | 0.178525 | -3.61711 |
| NONHSAT197775.1   | 1.490593 | 3.002366 | 2.988745 | 0.026827 | 0.178546 | -3.61735 |
| lnc-DNAH8-2:8     | -1.13986 | 1.87064  | -2.98856 | 0.026833 | 0.178559 | -3.6176  |
| lnc-RNF38-5:1     | -1.39721 | 3.018868 | -2.98803 | 0.026851 | 0.178613 | -3.61829 |
| NONHSAT174989.1   | -1.53631 | 2.483515 | -2.98801 | 0.026851 | 0.178613 | -3.61831 |
| NONHSAT215111.1   | 1.476868 | 2.203767 | 2.987159 | 0.026879 | 0.178718 | -3.61941 |
| ENST00000568150.3 | -1.82031 | 3.331119 | -2.98663 | 0.026897 | 0.178763 | -3.62009 |
| NONHSAT217760.1   | 1.274217 | 1.670395 | 2.986352 | 0.026906 | 0.178801 | -3.62046 |
| NONHSAT156532.1   | -1.53601 | 3.026101 | -2.98623 | 0.02691  | 0.178806 | -3.62062 |
| ENST00000429450.1 | -1.25502 | 2.807842 | -2.98596 | 0.026919 | 0.178852 | -3.62097 |
| NONHSAT152675.1   | 1.662986 | 2.508242 | 2.985266 | 0.026942 | 0.17892  | -3.62187 |
| ENST00000644636.1 | 1.174626 | 1.895231 | 2.985118 | 0.026947 | 0.17892  | -3.62206 |
| HLA-F-AS1:9       | -1.1216  | 3.857195 | -2.98483 | 0.026957 | 0.178927 | -3.62244 |
| ENST00000608316.1 | -1.18508 | 2.960487 | -2.98479 | 0.026958 | 0.178927 | -3.62249 |
| lnc-MID1-5:1      | 1.197799 | 1.987444 | 2.984571 | 0.026965 | 0.178927 | -3.62277 |

|                   |          |          |          |          |          |          |
|-------------------|----------|----------|----------|----------|----------|----------|
| NONHSAT223944.1   | 1.608554 | 2.977608 | 2.983971 | 0.026985 | 0.178972 | -3.62355 |
| NONHSAT217843.1   | 1.052607 | 3.662104 | 2.983367 | 0.027005 | 0.179035 | -3.62433 |
| NONHSAT186764.1   | -1.4938  | 2.706726 | -2.9831  | 0.027014 | 0.17907  | -3.62468 |
| NONHSAT156458.1   | -1.1113  | 3.026657 | -2.98297 | 0.027018 | 0.17908  | -3.62484 |
| MSTRG.65067.1     | 1.422601 | 2.306908 | 2.982664 | 0.027028 | 0.17908  | -3.62525 |
| NONHSAT222342.1   | -1.12353 | 3.324956 | -2.98248 | 0.027035 | 0.17908  | -3.62549 |
| NONHSAT168969.1   | -1.31977 | 2.412356 | -2.98217 | 0.027045 | 0.17908  | -3.62589 |
| lnc-PRDM2-2:1     | 1.272431 | 2.437037 | 2.982101 | 0.027047 | 0.17908  | -3.62598 |
| MSTRG.54468.1     | 1.664478 | 2.742653 | 2.981233 | 0.027076 | 0.17919  | -3.62711 |
| lnc-HIST1H2AA-4:1 | 1.387986 | 3.139323 | 2.980898 | 0.027087 | 0.179238 | -3.62754 |
| lnc-RCHY1-7:1     | 1.157624 | 2.711658 | 2.980717 | 0.027093 | 0.17925  | -3.62778 |
| NONHSAT199127.1   | 1.132278 | 3.437226 | 2.980684 | 0.027094 | 0.17925  | -3.62782 |
| NONHSAT172339.1   | -1.04104 | 2.202249 | -2.98049 | 0.027101 | 0.179268 | -3.62807 |
| lnc-ZNF100-8:1    | 1.355328 | 4.035406 | 2.979831 | 0.027123 | 0.179324 | -3.62893 |
| NONHSAT179044.1   | 1.222483 | 2.47385  | 2.979691 | 0.027127 | 0.179328 | -3.62911 |
| ENST00000660197.1 | 1.757609 | 2.430675 | 2.979224 | 0.027143 | 0.179384 | -3.62971 |
| NONHSAT219923.1   | 1.145626 | 3.932508 | 2.978969 | 0.027152 | 0.179394 | -3.63005 |
| NONHSAT218963.1   | 1.113932 | 3.544772 | 2.978456 | 0.027169 | 0.17946  | -3.63071 |
| lnc-DET1-1:19     | 1.995389 | 2.771013 | 2.97811  | 0.02718  | 0.179494 | -3.63116 |
| NONHSAT204151.1   | 1.377206 | 3.588441 | 2.977981 | 0.027185 | 0.179494 | -3.63133 |
| MSTRG.44208.7     | -1.23594 | 2.188388 | -2.97781 | 0.027191 | 0.179494 | -3.63156 |
| lnc-NR4A2-6:1     | 1.015596 | 5.773658 | 2.977419 | 0.027203 | 0.179524 | -3.63206 |
| lnc-EXT1-2:1      | 1.097073 | 2.640201 | 2.976874 | 0.027222 | 0.17961  | -3.63277 |
| NR_024065         | -1.12352 | 5.526867 | -2.97621 | 0.027244 | 0.179674 | -3.63363 |
| MAGI1-IT1:2       | -1.63013 | 3.502826 | -2.97604 | 0.02725  | 0.179701 | -3.63385 |
| NONHSAT191621.1   | -1.35003 | 3.318884 | -2.97586 | 0.027256 | 0.179726 | -3.63408 |
| lnc-C3orf80-1:1   | 1.342571 | 1.750094 | 2.975498 | 0.027268 | 0.17974  | -3.63455 |
| NONHSAT217095.1   | -1.1017  | 3.019659 | -2.97514 | 0.02728  | 0.179806 | -3.63502 |
| NONHSAT205277.1   | 1.71837  | 2.015993 | 2.974937 | 0.027287 | 0.179815 | -3.63528 |
| NONHSAT210818.1   | -1.16393 | 3.008679 | -2.97474 | 0.027294 | 0.179826 | -3.63554 |
| lnc-PLEKHA3-19:1  | 1.096938 | 3.369867 | 2.973505 | 0.027335 | 0.180011 | -3.63714 |
| NR_126564         | 1.786365 | 2.810635 | 2.97344  | 0.027337 | 0.180011 | -3.63723 |
| lnc-ABHD12B-2:1   | -1.08311 | 1.795982 | -2.97342 | 0.027338 | 0.180011 | -3.63726 |
| MSTRG.67959.1     | 1.273419 | 6.921525 | 2.973084 | 0.027349 | 0.180037 | -3.63769 |
| CARMN:23          | 1.085144 | 2.822694 | 2.973048 | 0.02735  | 0.180037 | -3.63774 |
| NONHSAT190141.1   | 1.027348 | 8.22393  | 2.971143 | 0.027415 | 0.180246 | -3.64021 |
| MSTRG.63532.1     | 1.357811 | 2.251442 | 2.970868 | 0.027424 | 0.180284 | -3.64057 |
| NONHSAT208093.1   | -1.15785 | 2.564432 | -2.96999 | 0.027454 | 0.180408 | -3.64171 |
| lnc-ACTN1-2:1     | -1.90949 | 3.077537 | -2.96965 | 0.027465 | 0.180425 | -3.64215 |
| lnc-MFSD8-12:1    | -1.06655 | 4.231849 | -2.96906 | 0.027485 | 0.180487 | -3.64292 |
| lnc-IFRD1-1:1     | 1.181311 | 2.114311 | 2.969052 | 0.027485 | 0.180487 | -3.64293 |
| lnc-KCNJ18-11:1   | 1.125769 | 1.691436 | 2.967756 | 0.027529 | 0.180534 | -3.64462 |
| lnc-KCNA5-4:1     | 1.197463 | 2.021455 | 2.967504 | 0.027538 | 0.18055  | -3.64494 |
| NONHSAT173782.1   | -1.05381 | 2.562238 | -2.96733 | 0.027544 | 0.180577 | -3.64517 |
| NONHSAT219494.1   | 1.11698  | 2.486003 | 2.967127 | 0.027551 | 0.180599 | -3.64543 |
| MSTRG.16151.1     | -1.28013 | 2.013376 | -2.96606 | 0.027587 | 0.180754 | -3.64682 |
| MSTRG.6988.1      | -1.0616  | 4.197708 | -2.96591 | 0.027592 | 0.180775 | -3.64702 |
| NONHSAT208391.1   | -1.26    | 2.2436   | -2.96579 | 0.027596 | 0.180775 | -3.64718 |

|                   |          |          |          |          |          |          |
|-------------------|----------|----------|----------|----------|----------|----------|
| NONHSAT205906.1   | -1.49729 | 3.733592 | -2.96546 | 0.027607 | 0.180794 | -3.6476  |
| lnc-FOXQ1-12:4    | 1.635595 | 2.619994 | 2.965004 | 0.027623 | 0.180836 | -3.64819 |
| NONHSAT169746.1   | 1.070012 | 3.873043 | 2.964969 | 0.027624 | 0.180836 | -3.64824 |
| lnc-RAD23B-2:1    | -1.10104 | 2.504952 | -2.96451 | 0.02764  | 0.180878 | -3.64884 |
| ENST00000450440.1 | 1.378699 | 3.488051 | 2.964036 | 0.027656 | 0.180948 | -3.64945 |
| MSTRG.56148.5     | -1.02132 | 4.870131 | -2.96382 | 0.027663 | 0.180971 | -3.64974 |
| NONHSAT193185.1   | 1.279673 | 2.016786 | 2.963379 | 0.027678 | 0.181001 | -3.65031 |
| lnc-COA3-1:1      | -1.52718 | 2.128858 | -2.96321 | 0.027684 | 0.181016 | -3.65053 |
| lnc-ITGA2-3:1     | 1.189628 | 3.301382 | 2.963207 | 0.027684 | 0.181016 | -3.65053 |
| ENST00000321214.2 | 1.384458 | 3.06752  | 2.962066 | 0.027723 | 0.181118 | -3.65202 |
| NONHSAT178125.1   | 1.749133 | 4.824785 | 2.961895 | 0.027729 | 0.18112  | -3.65224 |
| NONHSAT164743.1   | -1.13176 | 2.522092 | -2.96094 | 0.027762 | 0.18121  | -3.65348 |
| T259942           | -1.22878 | 2.597176 | -2.96092 | 0.027763 | 0.18121  | -3.6535  |
| MSTRG.2600.1      | -1.54986 | 3.009397 | -2.9606  | 0.027774 | 0.181247 | -3.65393 |
| MSTRG.60741.1     | -1.00412 | 3.001585 | -2.96041 | 0.02778  | 0.181253 | -3.65417 |
| NONHSAT201335.1   | 1.055395 | 3.431752 | 2.960242 | 0.027786 | 0.181257 | -3.65439 |
| NONHSAT159669.1   | 1.864248 | 2.439912 | 2.960186 | 0.027788 | 0.181257 | -3.65446 |
| NONHSAT206392.1   | -2.26245 | 2.532205 | -2.95965 | 0.027806 | 0.181317 | -3.65516 |
| lnc-POTEB3-1:6    | -1.53462 | 4.515442 | -2.95961 | 0.027808 | 0.181317 | -3.65521 |
| NONHSAT211115.1   | -1.00726 | 3.969876 | -2.95905 | 0.027827 | 0.18132  | -3.65593 |
| ENST00000650435.1 | -1.02606 | 2.422409 | -2.95903 | 0.027827 | 0.18132  | -3.65596 |
| lnc-KPNA4-1:2     | -1.35733 | 3.399791 | -2.95883 | 0.027834 | 0.181322 | -3.65623 |
| NONHSAT159064.1   | 1.173417 | 2.447402 | 2.958493 | 0.027846 | 0.181368 | -3.65666 |
| ENST00000659624.1 | -1.07462 | 2.142494 | -2.95828 | 0.027853 | 0.181402 | -3.65694 |
| lnc-NDFIP2-30:1   | 1.302833 | 2.107985 | 2.957756 | 0.027871 | 0.181449 | -3.65762 |
| lnc-ULK4-13:1     | 1.033352 | 1.533436 | 2.957653 | 0.027875 | 0.18146  | -3.65776 |
| NONHSAT201039.1   | 1.16378  | 1.606844 | 2.956387 | 0.027918 | 0.181662 | -3.6594  |
| MSTRG.9929.60     | -1.38251 | 3.077173 | -2.95593 | 0.027934 | 0.181718 | -3.66    |
| lnc-C6orf222-2:1  | 1.570515 | 2.978622 | 2.955209 | 0.027959 | 0.181833 | -3.66094 |
| NONHSAT167930.1   | -1.375   | 3.451719 | -2.95504 | 0.027965 | 0.181846 | -3.66115 |
| MSTRG.17759.1     | 1.816451 | 3.127159 | 2.954608 | 0.02798  | 0.181898 | -3.66172 |
| NONHSAT219666.1   | 1.570498 | 2.617629 | 2.954322 | 0.02799  | 0.181938 | -3.66209 |
| MSTRG.64700.1     | 1.300901 | 3.09158  | 2.953898 | 0.028004 | 0.181975 | -3.66264 |
| T271716           | -1.10088 | 1.799804 | -2.9535  | 0.028018 | 0.18203  | -3.66316 |
| NONHSAT155747.1   | -1.08637 | 3.823985 | -2.95294 | 0.028038 | 0.182104 | -3.66389 |
| T125434           | 1.661601 | 2.524601 | 2.952842 | 0.028041 | 0.182104 | -3.66402 |
| NONHSAT192308.1   | 1.995594 | 3.625153 | 2.952357 | 0.028058 | 0.182146 | -3.66465 |
| MSTRG.6207.19     | -1.44672 | 4.119891 | -2.95198 | 0.028071 | 0.182172 | -3.66514 |
| NONHSAT190488.1   | -1.27125 | 2.16996  | -2.95183 | 0.028076 | 0.182187 | -3.66533 |
| lnc-ARHGAP15-15:1 | -1.24539 | 4.02438  | -2.95152 | 0.028087 | 0.182218 | -3.66574 |
| NONHSAT174094.1   | 1.67057  | 2.352111 | 2.951463 | 0.028089 | 0.182218 | -3.66581 |
| NONHSAT196989.1   | -1.09976 | 1.647205 | -2.95083 | 0.028111 | 0.182279 | -3.66664 |
| ENST00000430988.1 | 1.332499 | 2.249309 | 2.949717 | 0.028149 | 0.182399 | -3.66809 |
| NONHSAT156716.1   | -1.24163 | 1.773564 | -2.94917 | 0.028168 | 0.182455 | -3.6688  |
| NONHSAT154620.1   | 1.440591 | 3.438825 | 2.949091 | 0.028171 | 0.182455 | -3.6689  |
| NONHSAT181574.1   | 2.074489 | 2.612852 | 2.948719 | 0.028184 | 0.182455 | -3.66939 |
| lnc-DISC1-7:1     | -1.17759 | 1.767449 | -2.948   | 0.028209 | 0.182455 | -3.67032 |
| NONHSAT188106.1   | 1.240095 | 3.60843  | 2.947679 | 0.02822  | 0.182455 | -3.67074 |

|                   |          |          |          |          |          |          |
|-------------------|----------|----------|----------|----------|----------|----------|
| ENST00000569431.1 | 1.060148 | 1.719542 | 2.947663 | 0.028221 | 0.182455 | -3.67076 |
| lnc-SHH-2:1       | -1.25209 | 1.985798 | -2.94738 | 0.028231 | 0.182463 | -3.67113 |
| MSTRG.15545.1     | -1.30464 | 3.331654 | -2.94734 | 0.028232 | 0.182463 | -3.67118 |
| lnc-TXNDC2-8:1    | -1.54836 | 3.53609  | -2.94681 | 0.028251 | 0.18253  | -3.67188 |
| ENST00000548217.5 | 1.154208 | 4.002024 | 2.946753 | 0.028253 | 0.18253  | -3.67195 |
| ENST00000422231.6 | -1.00637 | 1.89844  | -2.9467  | 0.028254 | 0.18253  | -3.67201 |
| NONHSAT221635.1   | 1.426095 | 2.256206 | 2.94651  | 0.028261 | 0.18255  | -3.67227 |
| ENST00000654400.1 | 1.684496 | 7.410432 | 2.945165 | 0.028308 | 0.182697 | -3.67402 |
| lnc-NCBP2-AS2-6:2 | -1.06866 | 3.282456 | -2.94512 | 0.02831  | 0.182697 | -3.67408 |
| ENST00000609657.1 | -1.12271 | 3.462443 | -2.94432 | 0.028338 | 0.182788 | -3.67512 |
| NONHSAT175647.1   | -1.09779 | 3.686335 | -2.9438  | 0.028356 | 0.182801 | -3.67579 |
| NONHSAT210794.1   | -1.51026 | 2.369621 | -2.94374 | 0.028358 | 0.182801 | -3.67587 |
| lnc-HSF2BP-1:1    | 1.123094 | 2.670621 | 2.942516 | 0.028401 | 0.18295  | -3.67747 |
| NONHSAT200153.1   | -1.13204 | 2.152528 | -2.94203 | 0.028418 | 0.183025 | -3.6781  |
| NONHSAT202451.1   | 1.180265 | 2.515418 | 2.941366 | 0.028442 | 0.183105 | -3.67897 |
| NONHSAT205584.1   | 2.044268 | 2.968568 | 2.940266 | 0.02848  | 0.183253 | -3.6804  |
| LINC01150:1       | 1.22388  | 7.063382 | 2.940006 | 0.02849  | 0.183253 | -3.68074 |
| T255242           | 1.996551 | 2.837492 | 2.938942 | 0.028527 | 0.183391 | -3.68213 |
| ENST00000604992.1 | 1.328047 | 7.419673 | 2.938642 | 0.028538 | 0.183431 | -3.68252 |
| lnc-SLC24A2-3:1   | 1.096298 | 2.374124 | 2.938245 | 0.028552 | 0.183476 | -3.68304 |
| ENST00000661878.1 | 1.007042 | 2.167865 | 2.93821  | 0.028553 | 0.183476 | -3.68308 |
| lnc-FAM13C-4:1    | -1.2235  | 3.420154 | -2.93801 | 0.02856  | 0.183481 | -3.68334 |
| lnc-SMIM3-1:1     | 1.086405 | 1.97896  | 2.93772  | 0.02857  | 0.183517 | -3.68372 |
| NONHSAT217123.1   | 1.06833  | 2.579036 | 2.937478 | 0.028579 | 0.183543 | -3.68404 |
| NONHSAT177183.1   | 1.475212 | 2.902166 | 2.937253 | 0.028587 | 0.183547 | -3.68433 |
| MSTRG.32279.75    | -1.31781 | 3.935082 | -2.93556 | 0.028647 | 0.183791 | -3.68653 |
| ENST00000588697.1 | 1.348077 | 2.640579 | 2.935062 | 0.028664 | 0.183826 | -3.68719 |
| MSTRG.63299.1     | 1.139745 | 2.276203 | 2.934846 | 0.028672 | 0.183826 | -3.68747 |
| ENST00000649558.1 | -1.18623 | 2.832171 | -2.93404 | 0.028701 | 0.183921 | -3.68852 |
| NONHSAT153751.1   | 1.03402  | 5.131435 | 2.933906 | 0.028705 | 0.183927 | -3.68869 |
| ENST00000657385.1 | -1.91359 | 2.472348 | -2.9338  | 0.028709 | 0.183927 | -3.68883 |
| ENST00000565861.1 | 1.658353 | 7.467835 | 2.932798 | 0.028745 | 0.184035 | -3.69014 |
| lnc-FGFR1OP-16:1  | 1.037419 | 7.959075 | 2.932639 | 0.02875  | 0.184048 | -3.69035 |
| lnc-HIBADH-1:4    | -1.15106 | 2.395612 | -2.93243 | 0.028758 | 0.184058 | -3.69062 |
| lnc-JCAD-9:1      | 1.192898 | 6.496565 | 2.931713 | 0.028783 | 0.184154 | -3.69155 |
| NONHSAT211882.1   | 1.073926 | 5.084572 | 2.930029 | 0.028844 | 0.184375 | -3.69375 |
| NONHSAT205769.1   | 1.117541 | 4.475242 | 2.929675 | 0.028856 | 0.184432 | -3.69421 |
| ENST00000657087.1 | 1.444569 | 2.310478 | 2.929579 | 0.02886  | 0.184442 | -3.69434 |
| ENST00000524707.1 | -1.29217 | 2.047708 | -2.92929 | 0.02887  | 0.184473 | -3.69471 |
| MSTRG.32939.1     | 1.778004 | 4.013741 | 2.928339 | 0.028904 | 0.184569 | -3.69596 |
| ENST00000509496.1 | 1.548002 | 3.449886 | 2.928257 | 0.028907 | 0.184569 | -3.69606 |
| NONHSAT220597.1   | -1.63462 | 2.710835 | -2.9282  | 0.028909 | 0.184569 | -3.69613 |
| NONHSAT164986.1   | 1.1099   | 7.438027 | 2.928158 | 0.028911 | 0.184569 | -3.69619 |
| NONHSAT167554.1   | 1.264685 | 3.024363 | 2.928011 | 0.028916 | 0.18459  | -3.69638 |
| NONHSAT171275.1   | 1.167827 | 3.452206 | 2.927913 | 0.028919 | 0.18459  | -3.69651 |
| MSTRG.49171.1     | -1.03347 | 3.020011 | -2.92748 | 0.028935 | 0.184614 | -3.69708 |
| ENST00000439198.1 | -1.00182 | 1.594208 | -2.92733 | 0.02894  | 0.184621 | -3.69727 |
| lnc-ADAM19-2:4    | 1.240296 | 1.971515 | 2.927038 | 0.028951 | 0.184625 | -3.69765 |

|                   |          |          |          |          |          |          |
|-------------------|----------|----------|----------|----------|----------|----------|
| NONHSAT172299.1   | 1.276379 | 1.739983 | 2.926994 | 0.028952 | 0.184625 | -3.69771 |
| lnc-OR13C4-6:1    | 1.124157 | 4.502438 | 2.926589 | 0.028967 | 0.184659 | -3.69824 |
| NONHSAT222600.1   | 1.30154  | 1.72584  | 2.926383 | 0.028974 | 0.184664 | -3.69851 |
| MSTRG.53009.1     | 1.089507 | 5.206778 | 2.926371 | 0.028975 | 0.184664 | -3.69852 |
| NONHSAT211984.1   | 1.285813 | 2.70712  | 2.925389 | 0.02901  | 0.184748 | -3.69981 |
| MSTRG.42932.2     | -1.02508 | 3.089976 | -2.92524 | 0.029015 | 0.184748 | -3.7     |
| lnc-HMGB2-12:1    | 1.388669 | 2.699701 | 2.925153 | 0.029018 | 0.184748 | -3.70011 |
| lnc-SP5-1:1       | 1.485754 | 3.075977 | 2.924859 | 0.029029 | 0.184763 | -3.7005  |
| lnc-UBL5-1:4      | -1.01181 | 4.16511  | -2.92452 | 0.029041 | 0.184794 | -3.70094 |
| lnc-HOXC13-5:1    | 1.523694 | 2.927183 | 2.923512 | 0.029077 | 0.184979 | -3.70225 |
| MSTRG.15938.8     | 1.01624  | 4.416947 | 2.923454 | 0.02908  | 0.18498  | -3.70233 |
| NONHSAT222896.1   | 1.822021 | 2.911884 | 2.923116 | 0.029092 | 0.185023 | -3.70277 |
| NONHSAT165022.1   | 1.105015 | 6.888597 | 2.923014 | 0.029095 | 0.185023 | -3.7029  |
| NONHSAT215142.1   | -1.23614 | 3.32739  | -2.92148 | 0.029151 | 0.185153 | -3.7049  |
| ENST00000669561.1 | -1.20446 | 2.543028 | -2.92114 | 0.029163 | 0.185175 | -3.70535 |
| lnc-CTSK-1:1      | -1.09968 | 2.725503 | -2.92104 | 0.029167 | 0.185184 | -3.70548 |
| NONHSAT197602.1   | 1.00156  | 8.264224 | 2.92096  | 0.02917  | 0.185185 | -3.70559 |
| MSTRG.62326.1     | 1.002673 | 2.162327 | 2.920662 | 0.02918  | 0.185225 | -3.70598 |
| NONHSAT171819.1   | -1.49471 | 2.226061 | -2.92022 | 0.029196 | 0.185267 | -3.70655 |
| MSTRG.66079.1     | -1.18175 | 1.683674 | -2.92022 | 0.029196 | 0.185267 | -3.70655 |
| T009776           | 1.226933 | 6.001119 | 2.919815 | 0.029211 | 0.185313 | -3.70708 |
| NONHSAT224019.1   | 1.202279 | 1.705438 | 2.919743 | 0.029214 | 0.185313 | -3.70718 |
| ENST00000568634.1 | -1.06631 | 1.636343 | -2.91913 | 0.029236 | 0.18541  | -3.70798 |
| MSTRG.26735.22    | 1.146835 | 3.497036 | 2.918944 | 0.029243 | 0.18541  | -3.70822 |
| lnc-MAPK6-3:10    | -1.09432 | 3.826723 | -2.91851 | 0.029258 | 0.185415 | -3.70878 |
| ENST00000522426.1 | 1.005792 | 1.88794  | 2.918419 | 0.029262 | 0.185426 | -3.70891 |
| MSTRG.1679.1      | -1.27336 | 2.025868 | -2.9176  | 0.029291 | 0.18556  | -3.70998 |
| NONHSAT162663.1   | 1.096159 | 4.695931 | 2.917427 | 0.029298 | 0.18556  | -3.7102  |
| ENST00000652941.1 | 1.839406 | 4.400823 | 2.91708  | 0.02931  | 0.185625 | -3.71065 |
| lnc-PSD-2:1       | 1.008373 | 4.08268  | 2.915219 | 0.029378 | 0.185848 | -3.71309 |
| NONHSAT175498.1   | -1.51461 | 3.82566  | -2.91429 | 0.029412 | 0.185993 | -3.7143  |
| NONHSAT171467.1   | 1.510763 | 3.026455 | 2.913951 | 0.029424 | 0.186035 | -3.71474 |
| NONHSAT202874.1   | 1.564618 | 2.790282 | 2.913693 | 0.029434 | 0.186066 | -3.71508 |
| ENST00000555539.1 | 1.352381 | 1.872632 | 2.913151 | 0.029454 | 0.186091 | -3.71579 |
| ENST00000417695.2 | 1.01475  | 5.662006 | 2.912662 | 0.029472 | 0.186091 | -3.71643 |
| NONHSAT218140.1   | 1.024048 | 2.102445 | 2.912644 | 0.029472 | 0.186091 | -3.71645 |
| NONHSAT211220.1   | 1.217495 | 3.518167 | 2.9126   | 0.029474 | 0.186091 | -3.71651 |
| NONHSAT208430.1   | -1.27662 | 4.403773 | -2.91171 | 0.029506 | 0.186181 | -3.71767 |
| ENST00000523365.1 | 1.853953 | 2.519254 | 2.911639 | 0.029509 | 0.186185 | -3.71776 |
| NONHSAT186506.1   | 1.21442  | 2.532327 | 2.911051 | 0.029531 | 0.186251 | -3.71853 |
| lnc-OR4F21-4:8    | 1.776987 | 2.650152 | 2.911011 | 0.029532 | 0.186251 | -3.71858 |
| ENST00000414161.1 | 1.316986 | 3.472143 | 2.910948 | 0.029534 | 0.186251 | -3.71867 |
| lnc-NCOA3-30:1    | 1.516455 | 2.995691 | 2.910294 | 0.029558 | 0.186318 | -3.71952 |
| NONHSAT159459.1   | -1.25498 | 6.600511 | -2.90962 | 0.029583 | 0.186431 | -3.7204  |
| T273532           | 1.044154 | 1.618427 | 2.908918 | 0.029609 | 0.186511 | -3.72132 |
| lnc-TRPV2-4:3     | 1.867025 | 4.243442 | 2.908586 | 0.029621 | 0.186563 | -3.72175 |
| ENST00000540906.1 | 1.265619 | 3.80118  | 2.90838  | 0.029629 | 0.186565 | -3.72202 |
| NONHSAT160868.1   | 1.128224 | 2.90171  | 2.908261 | 0.029633 | 0.186565 | -3.72218 |



|                   |          |          |          |          |          |          |
|-------------------|----------|----------|----------|----------|----------|----------|
| NONHSAT201976.1   | 1.003131 | 2.403315 | 2.90773  | 0.029653 | 0.186598 | -3.72287 |
| NONHSAT196094.1   | -1.27779 | 1.802907 | -2.90722 | 0.029671 | 0.18666  | -3.72354 |
| NONHSAT188959.1   | 1.341094 | 2.923671 | 2.90688  | 0.029684 | 0.186715 | -3.72398 |
| lnc-SERINC1-1:1   | -1.31494 | 5.259483 | -2.90676 | 0.029688 | 0.186715 | -3.72413 |
| MSTRG.7970.21     | 1.187043 | 2.106804 | 2.906436 | 0.0297   | 0.186715 | -3.72456 |
| NONHSAT157974.1   | 1.14687  | 2.099354 | 2.906354 | 0.029703 | 0.186715 | -3.72467 |
| lnc-MED10-23:1    | -1.34076 | 2.839908 | -2.90635 | 0.029703 | 0.186715 | -3.72467 |
| MSTRG.43589.2     | 1.195607 | 2.140861 | 2.905828 | 0.029723 | 0.186785 | -3.72536 |
| MSTRG.44556.1     | 1.064931 | 2.290902 | 2.905046 | 0.029752 | 0.186915 | -3.72638 |
| lnc-S1PR1-9:3     | -1.00233 | 2.432191 | -2.9048  | 0.029761 | 0.186919 | -3.7267  |
| lnc-RBMX-6:1      | -1.06491 | 2.317786 | -2.90437 | 0.029776 | 0.186989 | -3.72726 |
| NONHSAT158289.1   | 1.026927 | 2.49793  | 2.904349 | 0.029777 | 0.186989 | -3.72729 |
| NONHSAT193970.1   | -1.68455 | 3.307897 | -2.90306 | 0.029825 | 0.187198 | -3.72898 |
| MSTRG.35264.1     | 1.385287 | 3.817967 | 2.90305  | 0.029825 | 0.187198 | -3.72899 |
| lnc-RIPOR3-2:1    | 1.013253 | 4.737571 | 2.902989 | 0.029828 | 0.187198 | -3.72907 |
| NONHSAT223819.1   | 1.581463 | 2.702642 | 2.902808 | 0.029834 | 0.187208 | -3.72931 |
| NONHSAT189424.1   | -1.2501  | 2.434135 | -2.90265 | 0.02984  | 0.18722  | -3.72952 |
| NONHSAT186650.1   | 1.233835 | 2.317437 | 2.902312 | 0.029853 | 0.18723  | -3.72996 |
| MSTRG.9806.6      | -1.35211 | 2.030584 | -2.90119 | 0.029894 | 0.187397 | -3.73142 |
| NONHSAT201900.1   | -1.17201 | 3.129574 | -2.89996 | 0.02994  | 0.187592 | -3.73303 |
| NONHSAT216334.1   | 1.194048 | 3.230065 | 2.899846 | 0.029944 | 0.187604 | -3.73318 |
| MSTRG.717.1       | 1.006797 | 3.786793 | 2.899557 | 0.029955 | 0.187639 | -3.73356 |
| lnc-CCDC7-11:1    | 1.689855 | 2.632779 | 2.898756 | 0.029985 | 0.187759 | -3.73461 |
| ENST00000670797.1 | -1.03213 | 3.445296 | -2.89826 | 0.030004 | 0.187791 | -3.73526 |
| NONHSAT149645.1   | 1.016033 | 2.77122  | 2.898049 | 0.030011 | 0.187816 | -3.73553 |
| lnc-CRACR2A-1:3   | 1.014588 | 6.537003 | 2.897255 | 0.030041 | 0.187902 | -3.73657 |
| lnc-VAX2-4:1      | 1.318403 | 2.781479 | 2.896923 | 0.030054 | 0.187939 | -3.737   |
| NONHSAT185413.1   | 1.555704 | 2.21158  | 2.896218 | 0.03008  | 0.188003 | -3.73793 |
| ENST00000412809.1 | 1.316038 | 5.268434 | 2.896202 | 0.03008  | 0.188003 | -3.73795 |
| T377451           | 1.804786 | 2.361435 | 2.896055 | 0.030086 | 0.188005 | -3.73814 |
| lnc-MRPL47-6:1    | 1.122759 | 3.833022 | 2.895385 | 0.030111 | 0.188058 | -3.73902 |
| MSTRG.23397.1     | -1.48195 | 2.915932 | -2.89525 | 0.030116 | 0.188058 | -3.7392  |
| NONHSAT205586.1   | 1.064228 | 3.307126 | 2.89522  | 0.030117 | 0.188058 | -3.73923 |
| lnc-MYOM1-10:2    | -1.11033 | 3.278507 | -2.89486 | 0.030131 | 0.18812  | -3.73971 |
| NONHSAT205885.1   | 1.061258 | 1.642079 | 2.894217 | 0.030155 | 0.18819  | -3.74054 |
| T215273           | 1.364696 | 1.827066 | 2.894217 | 0.030155 | 0.18819  | -3.74055 |
| lnc-TES-2:1       | -1.37915 | 4.378471 | -2.8942  | 0.030156 | 0.18819  | -3.74057 |
| MSTRG.63562.1     | -1.51545 | 3.67822  | -2.89346 | 0.030183 | 0.188232 | -3.74154 |
| lnc-PEX2-5:1      | -1.21907 | 2.912653 | -2.89338 | 0.030186 | 0.188232 | -3.74164 |
| NONHSAT164036.1   | 1.345259 | 2.827473 | 2.892094 | 0.030235 | 0.188383 | -3.74332 |
| NONHSAT210334.1   | 1.902831 | 3.090744 | 2.89198  | 0.030239 | 0.188383 | -3.74347 |
| lnc-ANXA10-4:1    | 1.247686 | 4.210275 | 2.891849 | 0.030244 | 0.188383 | -3.74365 |
| NONHSAT214973.1   | 1.061005 | 1.64389  | 2.891844 | 0.030244 | 0.188383 | -3.74365 |
| lnc-SIRT1-7:1     | -1.43809 | 3.090004 | -2.89144 | 0.030259 | 0.188426 | -3.74418 |
| lnc-SLC16A9-6:1   | 1.044772 | 4.080643 | 2.890887 | 0.03028  | 0.188426 | -3.7449  |
| lnc-APOL2-5:1     | -1.21488 | 2.732962 | -2.89081 | 0.030283 | 0.188426 | -3.745   |
| lnc-ZBBX-6:1      | -1.05677 | 1.875138 | -2.88965 | 0.030327 | 0.188582 | -3.74652 |
| NONHSAT210185.1   | -1.03051 | 3.572496 | -2.88949 | 0.030333 | 0.188604 | -3.74674 |

|                   |          |          |          |          |          |          |
|-------------------|----------|----------|----------|----------|----------|----------|
| NONHSAT220824.1   | -1.10326 | 2.454263 | -2.88892 | 0.030354 | 0.188684 | -3.74747 |
| lnc-VCPIP1-2:1    | -1.00032 | 2.144601 | -2.88815 | 0.030383 | 0.18883  | -3.74848 |
| T231747           | -1.32299 | 2.806486 | -2.88776 | 0.030398 | 0.188861 | -3.74899 |
| lnc-CAV1-5:1      | -1.32112 | 2.823088 | -2.88766 | 0.030402 | 0.188861 | -3.74913 |
| NONHSAT210208.1   | 1.52235  | 3.985006 | 2.887612 | 0.030404 | 0.188861 | -3.74919 |
| NONHSAT216268.1   | 1.720923 | 2.360669 | 2.887445 | 0.03041  | 0.18888  | -3.74941 |
| MSTRG.60713.1     | 1.213817 | 3.590422 | 2.887203 | 0.030419 | 0.188883 | -3.74973 |
| NONHSAT223975.1   | -1.07627 | 4.233894 | -2.88718 | 0.03042  | 0.188883 | -3.74975 |
| lnc-ACE-5:1       | -1.15185 | 4.019109 | -2.88676 | 0.030436 | 0.18895  | -3.7503  |
| lnc-CALCRL-3:1    | 1.2543   | 2.493964 | 2.886051 | 0.030463 | 0.18904  | -3.75124 |
| NONHSAT155153.1   | 1.205847 | 2.692242 | 2.886039 | 0.030463 | 0.18904  | -3.75125 |
| ENST00000582692.2 | -1.24182 | 1.795309 | -2.88556 | 0.030482 | 0.189091 | -3.75188 |
| ENST00000625027.2 | -1.40579 | 2.77097  | -2.88419 | 0.030533 | 0.18926  | -3.75367 |
| LINC02290:25      | -1.37535 | 2.38961  | -2.88415 | 0.030535 | 0.18926  | -3.75372 |
| NONHSAT186963.1   | 1.026956 | 2.300932 | 2.884072 | 0.030538 | 0.18926  | -3.75383 |
| MSTRG.35747.33    | -1.18589 | 1.941769 | -2.88298 | 0.03058  | 0.189443 | -3.75526 |
| NONHSAT193263.1   | 1.034028 | 1.761407 | 2.882423 | 0.030601 | 0.189528 | -3.75599 |
| lnc-RPS4Y2-3:1    | 1.075616 | 3.672305 | 2.88232  | 0.030605 | 0.189541 | -3.75612 |
| NONHSAT198093.1   | -1.41306 | 2.697706 | -2.88149 | 0.030636 | 0.1897   | -3.75721 |
| lnc-ELAVL2-6:1    | 1.013487 | 4.361499 | 2.881447 | 0.030638 | 0.1897   | -3.75727 |
| lnc-MEI4-14:1     | -1.11627 | 3.996843 | -2.88135 | 0.030642 | 0.189702 | -3.75739 |
| NONHSAT207277.1   | 2.061614 | 3.524724 | 2.880992 | 0.030655 | 0.18975  | -3.75786 |
| MSTRG.42167.1     | 1.762068 | 5.269181 | 2.88036  | 0.03068  | 0.189849 | -3.75869 |
| lnc-AKR1C2-6:1    | 1.355564 | 2.614278 | 2.879525 | 0.030712 | 0.189922 | -3.75978 |
| lnc-FAM122A-1:2   | -1.13885 | 3.644283 | -2.8795  | 0.030713 | 0.189922 | -3.75982 |
| lnc-C5orf67-5:1   | 1.155827 | 4.185048 | 2.87936  | 0.030718 | 0.189922 | -3.76    |
| ENST00000656476.1 | 1.087076 | 1.754802 | 2.878816 | 0.030739 | 0.189942 | -3.76071 |
| MSTRG.36323.1     | 1.902207 | 2.752044 | 2.878296 | 0.030759 | 0.189992 | -3.7614  |
| NONHSAT186791.1   | -1.05948 | 4.243285 | -2.87806 | 0.030768 | 0.190018 | -3.76171 |
| MSTRG.45687.1     | -1.3269  | 1.906416 | -2.87773 | 0.03078  | 0.190068 | -3.76214 |
| NONHSAT190512.1   | 1.284097 | 3.5979   | 2.877491 | 0.03079  | 0.190112 | -3.76245 |
| lnc-ORC3-3:1      | 1.093769 | 5.654    | 2.87709  | 0.030805 | 0.190161 | -3.76298 |
| NONHSAT174158.1   | 1.985988 | 3.759928 | 2.877007 | 0.030808 | 0.190169 | -3.76308 |
| NONHSAT223998.1   | 1.556878 | 5.370307 | 2.876609 | 0.030823 | 0.190182 | -3.76361 |
| MSTRG.71801.2     | 1.385301 | 3.586984 | 2.876529 | 0.030826 | 0.190189 | -3.76371 |
| lnc-HEY1-1:8      | 1.66068  | 3.359531 | 2.876397 | 0.030832 | 0.190197 | -3.76388 |
| lnc-GBP5-5:1      | 1.210265 | 1.868955 | 2.876157 | 0.030841 | 0.190219 | -3.7642  |
| lnc-PRDM6-2:1     | -1.16605 | 2.926074 | -2.87595 | 0.030849 | 0.190245 | -3.76448 |
| NONHSAT205602.1   | 1.478115 | 2.491595 | 2.875828 | 0.030853 | 0.190251 | -3.76463 |
| ENST00000540136.1 | -1.03896 | 1.591559 | -2.87515 | 0.030879 | 0.190341 | -3.76552 |
| NONHSAT215265.1   | -1.23894 | 4.515728 | -2.87457 | 0.030902 | 0.190389 | -3.76628 |
| ENST00000606235.1 | 1.137986 | 3.841991 | 2.874559 | 0.030902 | 0.190389 | -3.76629 |
| NONHSAT166818.1   | -1.18536 | 1.699474 | -2.87384 | 0.03093  | 0.190475 | -3.76724 |
| lnc-AKAP14-6:1    | -1.23429 | 5.446832 | -2.873   | 0.030963 | 0.190553 | -3.76834 |
| ENST00000607727.1 | 1.202227 | 3.406899 | 2.872759 | 0.030972 | 0.190584 | -3.76865 |
| MSTRG.62019.1     | -1.20974 | 2.994511 | -2.87229 | 0.03099  | 0.190638 | -3.76927 |
| MSTRG.31397.1     | 1.81489  | 2.045192 | 2.871901 | 0.031005 | 0.190658 | -3.76978 |
| NR_027255         | 1.056221 | 3.563975 | 2.870467 | 0.03106  | 0.190803 | -3.77166 |

|                   |          |          |          |          |          |          |
|-------------------|----------|----------|----------|----------|----------|----------|
| MSTRG.61389.2     | 1.806438 | 4.014489 | 2.869825 | 0.031085 | 0.190923 | -3.7725  |
| ENST00000591422.1 | 1.13498  | 1.792257 | 2.869442 | 0.0311   | 0.190943 | -3.773   |
| NONHSAT214319.1   | -1.87876 | 2.909096 | -2.86861 | 0.031133 | 0.191061 | -3.7741  |
| MSTRG.42956.1     | 1.569698 | 4.337481 | 2.868307 | 0.031144 | 0.191097 | -3.77449 |
| lnc-CAPG-1:1      | 1.035539 | 3.146601 | 2.868099 | 0.031152 | 0.19111  | -3.77476 |
| lnc-SFXN1-1:1     | -1.07286 | 1.745108 | -2.86797 | 0.031157 | 0.19111  | -3.77493 |
| ENST00000611634.1 | 1.527554 | 2.590311 | 2.867964 | 0.031158 | 0.19111  | -3.77494 |
| lnc-DLGAP1-1:1    | 1.536148 | 4.63214  | 2.867655 | 0.03117  | 0.191113 | -3.77535 |
| NONHSAT161193.1   | 1.073074 | 4.813289 | 2.867524 | 0.031175 | 0.191113 | -3.77552 |
| NONHSAT158446.1   | 1.351102 | 4.069323 | 2.867436 | 0.031178 | 0.191113 | -3.77563 |
| MSTRG.49178.1     | 1.871442 | 2.869343 | 2.867398 | 0.03118  | 0.191113 | -3.77568 |
| LINC02074:12      | 1.071533 | 2.141207 | 2.867398 | 0.03118  | 0.191113 | -3.77568 |
| lnc-ANTXR1-1:1    | -1.46879 | 2.088922 | -2.86729 | 0.031184 | 0.191118 | -3.77582 |
| NONHSAT222090.1   | 1.45044  | 2.887603 | 2.866874 | 0.0312   | 0.191149 | -3.77637 |
| lnc-OIT3-2:1      | -1.01364 | 4.527384 | -2.86666 | 0.031208 | 0.191189 | -3.77666 |
| ENST00000607611.1 | -1.05419 | 5.106033 | -2.8662  | 0.031226 | 0.191223 | -3.77725 |
| lnc-FKBP3-6:1     | -1.2929  | 2.981369 | -2.86581 | 0.031242 | 0.191275 | -3.77777 |
| NONHSAT168323.1   | 1.47965  | 2.489775 | 2.865569 | 0.031251 | 0.191275 | -3.77808 |
| lnc-OLFML3-4:1    | 1.150896 | 1.901494 | 2.865546 | 0.031252 | 0.191275 | -3.77811 |
| NONHSAT165239.1   | 1.156209 | 2.14215  | 2.865409 | 0.031257 | 0.191289 | -3.77829 |
| ENST00000570210.1 | 1.605088 | 7.336471 | 2.865152 | 0.031267 | 0.191311 | -3.77863 |
| lnc-FCRL1-1:4     | 1.762711 | 3.205891 | 2.864761 | 0.031282 | 0.191374 | -3.77914 |
| ENST00000566912.2 | -1.37881 | 2.906895 | -2.86262 | 0.031366 | 0.191689 | -3.78195 |
| lnc-JPH3-6:2      | 1.179047 | 3.506216 | 2.862254 | 0.03138  | 0.191737 | -3.78243 |
| lnc-GMDS-22:1     | 1.08354  | 3.030846 | 2.861621 | 0.031405 | 0.1918   | -3.78326 |
| lnc-RC3H1-3:1     | 1.019345 | 1.922797 | 2.861354 | 0.031416 | 0.19184  | -3.78361 |
| NONHSAT163857.1   | 1.574643 | 3.262865 | 2.861055 | 0.031427 | 0.191847 | -3.78401 |
| MSTRG.57865.1     | 1.288395 | 2.102822 | 2.861038 | 0.031428 | 0.191847 | -3.78403 |
| NONHSAT158497.1   | 1.050115 | 2.750941 | 2.861037 | 0.031428 | 0.191847 | -3.78403 |
| lnc-CCND1-2:1     | 1.194932 | 3.351075 | 2.860647 | 0.031443 | 0.191899 | -3.78454 |
| NONHSAT222474.1   | -1.15393 | 2.104702 | -2.86063 | 0.031444 | 0.191899 | -3.78456 |
| lnc-SNAI1-3:1     | -1.53994 | 3.082771 | -2.86058 | 0.031446 | 0.191899 | -3.78463 |
| NONHSAT215450.1   | 1.432986 | 3.375351 | 2.860107 | 0.031465 | 0.191954 | -3.78525 |
| NONHSAT186627.1   | 1.62043  | 2.224169 | 2.860022 | 0.031468 | 0.191963 | -3.78536 |
| NONHSAT197546.1   | 1.310298 | 2.151753 | 2.859701 | 0.031481 | 0.192001 | -3.78578 |
| NONHSAT169829.1   | -1.1983  | 2.361427 | -2.85967 | 0.031482 | 0.192001 | -3.78583 |
| NONHSAT178698.1   | 1.879633 | 3.362928 | 2.858692 | 0.03152  | 0.192102 | -3.78711 |
| lnc-TP53INP2-1:1  | 1.701314 | 8.349001 | 2.858632 | 0.031523 | 0.192102 | -3.78719 |
| NONHSAT195745.1   | 1.164762 | 6.896391 | 2.858311 | 0.031535 | 0.192139 | -3.78761 |
| NONHSAT197053.1   | 1.060934 | 3.745544 | 2.858026 | 0.031547 | 0.192139 | -3.78798 |
| lnc-ATXN10-2:1    | -1.18184 | 2.090673 | -2.85748 | 0.031568 | 0.192217 | -3.7887  |
| ENST00000659799.1 | -1.1413  | 3.578188 | -2.857   | 0.031587 | 0.192257 | -3.78932 |
| MSTRG.38265.1     | 1.306971 | 2.6256   | 2.856863 | 0.031592 | 0.192264 | -3.78951 |
| ENST00000542577.2 | 1.222142 | 2.501928 | 2.85657  | 0.031604 | 0.19228  | -3.78989 |
| lnc-PIK3C3-2:4    | -1.09203 | 2.502795 | -2.85639 | 0.031611 | 0.192301 | -3.79013 |
| NONHSAT180184.1   | 1.326334 | 2.278894 | 2.856165 | 0.03162  | 0.19232  | -3.79043 |
| MSTRG.52420.1     | 1.186468 | 2.133526 | 2.856114 | 0.031622 | 0.19232  | -3.79049 |
| NONHSAT218820.1   | 1.091308 | 3.224909 | 2.856018 | 0.031626 | 0.192323 | -3.79062 |

|                   |          |          |          |          |          |          |
|-------------------|----------|----------|----------|----------|----------|----------|
| lnc-LRGUK-4:1     | -1.15417 | 4.178719 | -2.85589 | 0.031631 | 0.192323 | -3.79079 |
| NONHSAT156420.1   | 1.864332 | 3.229476 | 2.855336 | 0.031653 | 0.192401 | -3.79151 |
| NONHSAT197114.1   | 1.297201 | 4.034533 | 2.855324 | 0.031653 | 0.192401 | -3.79153 |
| lnc-GAS1-4:1      | 1.243479 | 2.171479 | 2.854714 | 0.031677 | 0.192461 | -3.79233 |
| lnc-TOX3-10:1     | 1.518389 | 6.884146 | 2.854708 | 0.031678 | 0.192461 | -3.79234 |
| NONHSAT205868.1   | 1.074771 | 1.813231 | 2.854551 | 0.031684 | 0.192487 | -3.79254 |
| NR_125941         | 1.536922 | 2.652609 | 2.854182 | 0.031698 | 0.192521 | -3.79303 |
| NONHSAT217282.1   | 1.202301 | 3.236237 | 2.85369  | 0.031718 | 0.19256  | -3.79367 |
| lnc-NUCB2-2:1     | -1.00337 | 4.402081 | -2.85322 | 0.031737 | 0.192569 | -3.79429 |
| MSTRG.7456.1      | -1.06144 | 2.424386 | -2.85215 | 0.031779 | 0.192705 | -3.79569 |
| NONHSAT202778.1   | 1.135611 | 1.665177 | 2.851912 | 0.031788 | 0.19274  | -3.79601 |
| NONHSAT198775.1   | 1.329408 | 4.520081 | 2.85114  | 0.031819 | 0.192764 | -3.79702 |
| lnc-SPTSSB-7:1    | 1.491263 | 2.967949 | 2.850817 | 0.031832 | 0.192795 | -3.79745 |
| MSTRG.36930.2     | 1.159371 | 2.226706 | 2.850683 | 0.031837 | 0.192795 | -3.79762 |
| lnc-PPP2R3C-2:1   | 1.708798 | 3.607944 | 2.849921 | 0.031868 | 0.192826 | -3.79862 |
| NONHSAT201299.1   | 1.15652  | 2.248748 | 2.848827 | 0.031911 | 0.19294  | -3.80006 |
| lnc-ASCC3-4:1     | -1.53277 | 2.418684 | -2.84743 | 0.031967 | 0.193079 | -3.80189 |
| NONHSAT221747.1   | 1.546552 | 2.467136 | 2.846587 | 0.032001 | 0.193214 | -3.803   |
| lnc-NEDD1-8:1     | 1.471718 | 2.318418 | 2.846122 | 0.03202  | 0.193268 | -3.80362 |
| MSTRG.2923.1      | 1.258855 | 4.260297 | 2.84603  | 0.032023 | 0.193268 | -3.80374 |
| NONHSAT180745.1   | 1.084036 | 2.141662 | 2.845658 | 0.032038 | 0.193288 | -3.80422 |
| ENST00000655873.1 | 1.33061  | 2.272595 | 2.845295 | 0.032053 | 0.193342 | -3.8047  |
| lnc-PSD3-4:1      | 1.258596 | 2.256594 | 2.844447 | 0.032087 | 0.193456 | -3.80582 |
| ENST00000514411.1 | 1.371379 | 2.82152  | 2.844439 | 0.032087 | 0.193456 | -3.80583 |
| NONHSAT201086.1   | 1.453243 | 2.711385 | 2.844244 | 0.032095 | 0.19348  | -3.80608 |
| NONHSAT209963.1   | 1.610682 | 2.571402 | 2.843444 | 0.032127 | 0.193628 | -3.80714 |
| T304305           | -1.20978 | 2.474465 | -2.84291 | 0.032149 | 0.193723 | -3.80784 |
| lnc-PABPC1-2:1    | -1.08092 | 3.075876 | -2.8424  | 0.032169 | 0.193801 | -3.80851 |
| NONHSAT157010.1   | 2.230113 | 3.046362 | 2.842141 | 0.032179 | 0.193851 | -3.80885 |
| T016182           | -1.1313  | 2.302566 | -2.84012 | 0.032261 | 0.194132 | -3.81151 |
| NONHSAT197418.1   | 1.145984 | 1.888425 | 2.840029 | 0.032265 | 0.194132 | -3.81162 |
| NONHSAT190050.1   | 1.008533 | 3.770357 | 2.838146 | 0.032341 | 0.194388 | -3.8141  |
| NONHSAT210822.1   | 1.452956 | 1.740479 | 2.838121 | 0.032342 | 0.194388 | -3.81413 |
| NONHSAT153965.1   | 1.208467 | 1.85651  | 2.837972 | 0.032348 | 0.194395 | -3.81433 |
| NONHSAT174274.1   | 1.427578 | 2.377719 | 2.837947 | 0.032349 | 0.194395 | -3.81436 |
| NONHSAT201823.1   | 1.201605 | 3.584154 | 2.836774 | 0.032396 | 0.194535 | -3.8159  |
| MSTRG.49407.3     | 1.026278 | 3.646933 | 2.836608 | 0.032403 | 0.194535 | -3.81612 |
| NONHSAT190296.1   | 1.749553 | 3.736449 | 2.836017 | 0.032427 | 0.194634 | -3.8169  |
| ENST00000573260.1 | -1.1745  | 1.937417 | -2.83497 | 0.03247  | 0.194739 | -3.81828 |
| NONHSAT215015.1   | 1.163633 | 2.065715 | 2.834578 | 0.032486 | 0.194765 | -3.81879 |
| NONHSAT150633.1   | 1.528606 | 4.967338 | 2.833379 | 0.032534 | 0.194877 | -3.82037 |
| ENST00000658879.1 | 1.446135 | 1.826169 | 2.833349 | 0.032536 | 0.194877 | -3.82041 |
| lnc-LYPLAL1-7:1   | -1.24861 | 3.207566 | -2.83325 | 0.03254  | 0.194877 | -3.82054 |
| MSTRG.39891.1     | 1.07552  | 3.480695 | 2.833213 | 0.032541 | 0.194877 | -3.82059 |
| NONHSAT180797.1   | 1.013799 | 1.610725 | 2.832913 | 0.032553 | 0.194893 | -3.82098 |
| lnc-CCDC28A-3:1   | 1.641246 | 4.002425 | 2.831927 | 0.032594 | 0.195053 | -3.82228 |
| lnc-SELENOV-4:1   | 1.716951 | 3.120689 | 2.831672 | 0.032604 | 0.195057 | -3.82261 |
| NONHSAT196031.1   | 1.375176 | 2.904348 | 2.831055 | 0.032629 | 0.195134 | -3.82343 |

|                   |          |          |          |          |          |          |
|-------------------|----------|----------|----------|----------|----------|----------|
| lnc-C2orf91-5:1   | 1.201943 | 1.677623 | 2.831023 | 0.032631 | 0.195134 | -3.82347 |
| NONHSAT167509.1   | 1.004456 | 3.404017 | 2.83098  | 0.032632 | 0.195134 | -3.82352 |
| NONHSAT171149.1   | 1.486018 | 2.679265 | 2.830766 | 0.032641 | 0.195146 | -3.82381 |
| lnc-MBOAT1-9:1    | 1.535485 | 1.928004 | 2.83074  | 0.032642 | 0.195146 | -3.82384 |
| NONHSAT182791.1   | -1.39749 | 3.86035  | -2.83006 | 0.03267  | 0.195247 | -3.82474 |
| ENST00000605007.1 | -1.13673 | 5.075627 | -2.82983 | 0.032679 | 0.195247 | -3.82504 |
| NONHSAT197519.1   | -1.50271 | 1.967428 | -2.82969 | 0.032685 | 0.195247 | -3.82522 |
| lnc-C14orf132-2:1 | -1.45029 | 3.589055 | -2.82935 | 0.032699 | 0.19529  | -3.82567 |
| NONHSAT214775.1   | 1.368915 | 3.317803 | 2.828303 | 0.032742 | 0.195399 | -3.82705 |
| lnc-UGGT1-8:1     | 1.025756 | 2.747833 | 2.828018 | 0.032754 | 0.195431 | -3.82742 |
| NONHSAT205772.1   | 1.363261 | 2.719506 | 2.827633 | 0.032769 | 0.195485 | -3.82793 |
| lnc-E2F6-6:1      | 1.502318 | 2.965342 | 2.82761  | 0.03277  | 0.195485 | -3.82796 |
| NONHSAT153422.1   | 1.151183 | 2.157235 | 2.827346 | 0.032781 | 0.195499 | -3.82831 |
| MSTRG.70036.1     | 1.620969 | 3.028322 | 2.826843 | 0.032802 | 0.195556 | -3.82897 |
| MSTRG.1195.2      | 1.210706 | 2.342817 | 2.826726 | 0.032807 | 0.195556 | -3.82912 |
| NONHSAT154396.1   | 1.059626 | 3.250892 | 2.825606 | 0.032853 | 0.195745 | -3.8306  |
| lnc-ATG2B-18:1    | 1.21978  | 3.182312 | 2.825528 | 0.032856 | 0.195752 | -3.8307  |
| NONHSAT158010.1   | 1.549412 | 2.430207 | 2.8251   | 0.032874 | 0.195808 | -3.83126 |
| lnc-SSTR2-1:2     | 1.118646 | 1.833453 | 2.825021 | 0.032877 | 0.195808 | -3.83137 |
| lnc-FBXL3-1:6     | -1.12002 | 3.703932 | -2.82462 | 0.032894 | 0.195818 | -3.83189 |
| T379777           | 1.709166 | 3.032228 | 2.823993 | 0.032919 | 0.195841 | -3.83272 |
| MSTRG.34711.1     | -1.08074 | 2.742513 | -2.82383 | 0.032926 | 0.195841 | -3.83293 |
| ENST00000635331.1 | -1.36703 | 3.018726 | -2.82361 | 0.032935 | 0.195866 | -3.83323 |
| lnc-GPBP1-9:2     | 1.244648 | 5.768678 | 2.82315  | 0.032954 | 0.19594  | -3.83383 |
| lnc-C1D-8:1       | 1.428869 | 2.856532 | 2.822798 | 0.032969 | 0.195971 | -3.83429 |
| NONHSAT218590.1   | -1.46203 | 2.985789 | -2.82268 | 0.032974 | 0.195971 | -3.83444 |
| T315345           | 2.13986  | 4.04258  | 2.822473 | 0.032982 | 0.195994 | -3.83472 |
| NONHSAT214616.1   | 1.491394 | 6.537516 | 2.822007 | 0.033002 | 0.196072 | -3.83533 |
| lnc-ZNF587-2:1    | -1.39822 | 2.660906 | -2.82195 | 0.033004 | 0.196072 | -3.83541 |
| NONHSAT200360.1   | 1.564398 | 2.91064  | 2.821855 | 0.033008 | 0.196072 | -3.83553 |
| lnc-GRM4-2:2      | -1.1321  | 2.222163 | -2.82183 | 0.033009 | 0.196072 | -3.83557 |
| lnc-FOXP1-4:1     | 1.146086 | 2.514665 | 2.821661 | 0.033016 | 0.196082 | -3.83579 |
| NONHSAT189307.1   | 1.287321 | 2.630697 | 2.821482 | 0.033023 | 0.196111 | -3.83602 |
| MSTRG.22405.1     | 1.956421 | 5.537124 | 2.820527 | 0.033063 | 0.196207 | -3.83728 |
| MSTRG.12929.1     | -1.07849 | 3.363505 | -2.81993 | 0.033088 | 0.196291 | -3.83807 |
| MSTRG.5234.11     | 1.230797 | 2.738708 | 2.819764 | 0.033095 | 0.196303 | -3.83829 |
| NONHSAT173841.1   | 1.33146  | 2.104732 | 2.819293 | 0.033114 | 0.196361 | -3.83891 |
| lnc-UFM1-3:1      | 1.054448 | 4.378856 | 2.818309 | 0.033155 | 0.196498 | -3.8402  |
| MSTRG.57030.11    | 1.577751 | 2.554206 | 2.817139 | 0.033204 | 0.196591 | -3.84174 |
| NONHSAT165189.1   | -1.1094  | 1.668599 | -2.81695 | 0.033211 | 0.196614 | -3.84199 |
| lnc-ZSWIM6-7:1    | 1.689806 | 2.595794 | 2.816677 | 0.033223 | 0.19666  | -3.84235 |
| NONHSAT191789.1   | 1.369161 | 2.887254 | 2.815777 | 0.033261 | 0.196824 | -3.84354 |
| NONHSAT221212.1   | 1.920302 | 2.687817 | 2.814883 | 0.033298 | 0.196899 | -3.84472 |
| NONHSAT221244.1   | 1.582889 | 2.820847 | 2.814708 | 0.033305 | 0.196899 | -3.84495 |
| NR_102371         | 1.025656 | 3.617857 | 2.814503 | 0.033314 | 0.196899 | -3.84522 |
| lnc-RAD21-1:6     | 1.081225 | 2.776517 | 2.814499 | 0.033314 | 0.196899 | -3.84522 |
| NONHSAT205197.1   | 1.016896 | 1.641218 | 2.813173 | 0.033369 | 0.197093 | -3.84697 |
| ENST00000555303.1 | -1.07066 | 1.664797 | -2.81316 | 0.03337  | 0.197093 | -3.84698 |

|                     |          |          |          |          |          |          |
|---------------------|----------|----------|----------|----------|----------|----------|
| ENST00000577835.1   | 1.109256 | 2.437138 | 2.811857 | 0.033425 | 0.197295 | -3.8487  |
| NONHSAT202019.1     | -1.3277  | 3.191289 | -2.81136 | 0.033446 | 0.197353 | -3.84936 |
| NGF-AS1:6           | 1.395193 | 3.144116 | 2.811006 | 0.03346  | 0.197384 | -3.84982 |
| NONHSAT211423.1     | 1.098043 | 1.598103 | 2.810275 | 0.033491 | 0.197482 | -3.85079 |
| ENST00000655303.1   | 1.148071 | 5.316812 | 2.81018  | 0.033495 | 0.197494 | -3.85091 |
| NONHSAT175098.1     | 1.367194 | 2.194324 | 2.809862 | 0.033508 | 0.197515 | -3.85133 |
| lnc-STARD5-1:1      | -1.12609 | 3.103586 | -2.80874 | 0.033556 | 0.197608 | -3.85281 |
| NONHSAT208296.1     | -1.14624 | 4.195438 | -2.80862 | 0.033561 | 0.197608 | -3.85297 |
| NONHSAT218646.1     | -1.00155 | 2.921456 | -2.80817 | 0.03358  | 0.197646 | -3.85356 |
| NONHSAT201607.1     | 1.561064 | 2.53461  | 2.807773 | 0.033597 | 0.197694 | -3.85408 |
| ENST00000652848.1   | -1.14396 | 1.694014 | -2.80759 | 0.033604 | 0.197717 | -3.85432 |
| NR_047508           | -1.44361 | 3.016649 | -2.80709 | 0.033625 | 0.197777 | -3.85499 |
| LINC01268:11        | -1.13334 | 4.913537 | -2.80613 | 0.033666 | 0.197949 | -3.85625 |
| lnc-CDH6-21:1       | -1.39501 | 1.96547  | -2.80496 | 0.033716 | 0.198134 | -3.85779 |
| lnc-C17orf62-6:1    | -1.33276 | 2.649524 | -2.80484 | 0.033721 | 0.19814  | -3.85795 |
| ENST00000666585.1   | -1.28216 | 3.000404 | -2.80475 | 0.033724 | 0.198143 | -3.85807 |
| ENST00000526947.1   | -1.42304 | 3.023552 | -2.80408 | 0.033753 | 0.198236 | -3.85895 |
| NONHSAT214027.1     | 1.274324 | 1.872716 | 2.803297 | 0.033786 | 0.19836  | -3.85998 |
| MSTRG.35550.1       | -1.51273 | 3.875265 | -2.80292 | 0.033802 | 0.1984   | -3.86049 |
| NONHSAT174848.1     | -1.33914 | 2.743328 | -2.80238 | 0.033825 | 0.198451 | -3.86119 |
| lnc-HNRNPA1P48-18:1 | -1.24243 | 3.434592 | -2.80235 | 0.033826 | 0.198451 | -3.86123 |
| lnc-PRPS1-4:2       | 1.447984 | 2.932049 | 2.801416 | 0.033866 | 0.198553 | -3.86246 |
| lnc-PPP1R3G-7:1     | -1.05786 | 2.365442 | -2.80128 | 0.033872 | 0.198561 | -3.86264 |
| NONHSAT150141.1     | 1.609771 | 3.097305 | 2.800763 | 0.033894 | 0.198616 | -3.86332 |
| NONHSAT211848.1     | 1.45987  | 2.360638 | 2.800723 | 0.033896 | 0.198616 | -3.86338 |
| ENST00000449780.1   | 1.367485 | 2.295    | 2.800113 | 0.033922 | 0.198719 | -3.86418 |
| T067871             | 1.084622 | 2.198973 | 2.799366 | 0.033953 | 0.198833 | -3.86517 |
| NONHSAT167738.1     | 1.311578 | 5.952872 | 2.799332 | 0.033955 | 0.198833 | -3.86521 |
| ENST00000648175.1   | 1.401956 | 5.741709 | 2.799013 | 0.033969 | 0.198855 | -3.86563 |
| NONHSAT167976.1     | 1.104024 | 10.62312 | 2.797969 | 0.034013 | 0.198953 | -3.86701 |
| lnc-ZNF664-3:3      | -1.24106 | 2.136695 | -2.79757 | 0.03403  | 0.19896  | -3.86753 |
| NONHSAT207609.1     | -1.37384 | 2.135031 | -2.79706 | 0.034052 | 0.19902  | -3.86821 |
| NONHSAT210695.1     | -1.3843  | 3.020205 | -2.79686 | 0.034061 | 0.19906  | -3.86848 |
| lnc-HNRNPA1P48-17:1 | 1.289059 | 2.090339 | 2.796748 | 0.034065 | 0.19907  | -3.86862 |
| MSTRG.31648.85      | -1.0008  | 1.610429 | -2.7966  | 0.034072 | 0.19907  | -3.86882 |
| NONHSAT187302.1     | 1.122295 | 5.828258 | 2.796522 | 0.034075 | 0.19907  | -3.86892 |
| MSTRG.43849.2       | 1.056781 | 4.157347 | 2.796269 | 0.034086 | 0.199115 | -3.86925 |
| ENST00000668805.1   | -1.10587 | 3.010247 | -2.79576 | 0.034108 | 0.199134 | -3.86993 |
| NONHSAT216462.1     | 1.184962 | 1.903495 | 2.795699 | 0.03411  | 0.199134 | -3.87    |
| NONHSAT204935.1     | 1.703701 | 3.83549  | 2.795646 | 0.034113 | 0.199134 | -3.87008 |
| NONHSAT212141.1     | 1.085052 | 4.184109 | 2.795641 | 0.034113 | 0.199134 | -3.87008 |
| NONHSAT168816.1     | -1.28013 | 2.674206 | -2.79499 | 0.034141 | 0.199225 | -3.87094 |
| NONHSAT177949.1     | 1.289036 | 1.726337 | 2.794971 | 0.034142 | 0.199225 | -3.87097 |
| lnc-CLEC4M-3:1      | -1.19148 | 5.462491 | -2.79387 | 0.034189 | 0.19938  | -3.87242 |
| T283245             | 1.212405 | 4.234197 | 2.793503 | 0.034205 | 0.199439 | -3.8729  |
| lnc-TPK1-3:1        | 1.046263 | 5.906838 | 2.792637 | 0.034242 | 0.199615 | -3.87404 |
| NONHSAT179030.1     | 1.296794 | 4.435848 | 2.791944 | 0.034272 | 0.199738 | -3.87496 |
| NONHSAT199992.1     | 1.263064 | 2.489719 | 2.79186  | 0.034276 | 0.199748 | -3.87507 |

|                   |          |          |          |          |          |          |
|-------------------|----------|----------|----------|----------|----------|----------|
| ENST00000508581.1 | 1.115847 | 1.688546 | 2.791272 | 0.034301 | 0.199815 | -3.87585 |
| NONHSAT161209.1   | 1.205841 | 4.883647 | 2.791117 | 0.034308 | 0.199829 | -3.87605 |
| T150949           | 1.557357 | 3.071278 | 2.790097 | 0.034352 | 0.199915 | -3.8774  |
| NONHSAT200649.1   | 1.070668 | 3.352063 | 2.789469 | 0.034379 | 0.199992 | -3.87823 |
| lnc-USP6-3:1      | -1.24726 | 3.624303 | -2.78892 | 0.034403 | 0.200107 | -3.87895 |
| NONHSAT217900.1   | -1.01443 | 3.767982 | -2.78858 | 0.034418 | 0.200182 | -3.8794  |
| NONHSAT170374.1   | -1.09186 | 3.815015 | -2.78807 | 0.03444  | 0.200253 | -3.88007 |
| ENST00000666383.1 | 1.102336 | 3.555095 | 2.787854 | 0.034449 | 0.200254 | -3.88036 |
| lnc-NTMT1-7:2     | 1.253703 | 1.758501 | 2.787835 | 0.03445  | 0.200254 | -3.88038 |
| ENST00000435702.1 | 1.067041 | 6.785998 | 2.787491 | 0.034465 | 0.200306 | -3.88084 |
| MSTRG.37338.1     | -1.46453 | 2.726708 | -2.7872  | 0.034477 | 0.200321 | -3.88122 |
| lnc-ZNF614-1:2    | 1.327366 | 6.789842 | 2.786878 | 0.034491 | 0.200371 | -3.88165 |
| lnc-DYNAP-36:1    | 1.256881 | 2.579664 | 2.78594  | 0.034532 | 0.200514 | -3.88288 |
| NONHSAT221543.1   | 1.311705 | 2.759229 | 2.785528 | 0.03455  | 0.200523 | -3.88343 |
| lnc-LSM11-5:1     | -1.36997 | 1.931235 | -2.78467 | 0.034587 | 0.200661 | -3.88457 |
| T224929           | -1.25306 | 2.739917 | -2.78333 | 0.034646 | 0.200812 | -3.88633 |
| lnc-LAMA1-6:1     | 1.602598 | 2.833001 | 2.783129 | 0.034655 | 0.200834 | -3.8866  |
| T347696           | -1.24193 | 3.900608 | -2.78203 | 0.034702 | 0.200958 | -3.88804 |
| lnc-OLFML3-3:1    | 1.690402 | 5.150703 | 2.781225 | 0.034738 | 0.201083 | -3.88911 |
| IDH2-DT:16        | 1.179088 | 2.872659 | 2.780807 | 0.034756 | 0.201098 | -3.88966 |
| NONHSAT191408.1   | 1.354492 | 2.161864 | 2.780777 | 0.034757 | 0.201098 | -3.8897  |
| NONHSAT219981.1   | 1.070018 | 2.026556 | 2.77983  | 0.034799 | 0.201239 | -3.89095 |
| MSTRG.66755.1     | 1.31672  | 2.497374 | 2.779557 | 0.034811 | 0.201262 | -3.89131 |
| ENST00000569778.1 | -1.10917 | 2.311683 | -2.77919 | 0.034827 | 0.201299 | -3.8918  |
| lnc-ATP6V1G3-4:4  | 1.432871 | 7.584146 | 2.778915 | 0.034839 | 0.201334 | -3.89216 |
| lnc-TCIM-4:1      | -1.22744 | 2.682783 | -2.77837 | 0.034863 | 0.201402 | -3.89288 |
| NONHSAT172924.1   | -1.22415 | 1.969035 | -2.77758 | 0.034898 | 0.201509 | -3.89392 |
| NONHSAT172358.1   | 1.563568 | 2.40944  | 2.777229 | 0.034913 | 0.201569 | -3.89439 |
| ENST00000556212.1 | 1.234341 | 3.187819 | 2.777212 | 0.034914 | 0.201569 | -3.89441 |
| lnc-ADGRA3-107:2  | -1.00391 | 4.17251  | -2.77681 | 0.034932 | 0.201644 | -3.89494 |
| NONHSAT200427.1   | 1.524166 | 2.341944 | 2.776028 | 0.034966 | 0.201709 | -3.89598 |
| MSTRG.42822.5     | 1.174034 | 2.554891 | 2.775788 | 0.034977 | 0.201724 | -3.89629 |
| ENST00000454622.2 | 1.293764 | 4.900713 | 2.775741 | 0.034979 | 0.201724 | -3.89635 |
| lnc-KHDRBS2-2:1   | 1.485111 | 2.63269  | 2.775534 | 0.034988 | 0.201758 | -3.89663 |
| lnc-ATP6V1C1-12:1 | 1.734175 | 2.614201 | 2.775487 | 0.03499  | 0.201758 | -3.89669 |
| T365986           | 1.153452 | 3.682712 | 2.775387 | 0.034994 | 0.201768 | -3.89682 |
| GAS1RR:14         | 1.306227 | 1.681719 | 2.774028 | 0.035054 | 0.201975 | -3.89862 |
| NONHSAT205534.1   | -1.00331 | 1.745511 | -2.77286 | 0.035106 | 0.202088 | -3.90016 |
| NONHSAT206003.1   | 1.575889 | 2.485729 | 2.77257  | 0.035119 | 0.202104 | -3.90054 |
| NONHSAT199849.1   | 1.061075 | 4.315771 | 2.772337 | 0.035129 | 0.202129 | -3.90085 |
| MSTRG.64186.1     | 1.416926 | 2.345779 | 2.772087 | 0.03514  | 0.202156 | -3.90118 |
| NONHSAT176146.1   | 1.073471 | 3.022688 | 2.771281 | 0.035176 | 0.202295 | -3.90225 |
| lnc-EXTL2-3:1     | -1.12424 | 1.688486 | -2.77103 | 0.035187 | 0.20233  | -3.90258 |
| ENST00000451295.1 | -1.12483 | 2.633693 | -2.77096 | 0.03519  | 0.20233  | -3.90267 |
| MSTRG.61091.1     | -1.30869 | 2.312385 | -2.77072 | 0.035201 | 0.202346 | -3.90299 |
| PCGEM1:5          | 1.110749 | 3.427239 | 2.77041  | 0.035215 | 0.202369 | -3.9034  |
| lnc-KLHL8-2:1     | 1.013584 | 1.606748 | 2.770169 | 0.035225 | 0.202369 | -3.90372 |
| NONHSAT177628.1   | -1.42832 | 3.223855 | -2.76999 | 0.035233 | 0.202369 | -3.90395 |

|                   |          |          |          |          |          |          |
|-------------------|----------|----------|----------|----------|----------|----------|
| NONHSAT199656.1   | 1.475946 | 7.769392 | 2.769623 | 0.03525  | 0.202407 | -3.90444 |
| lnc-MRPL39-19:1   | 1.248319 | 2.330259 | 2.768935 | 0.03528  | 0.202502 | -3.90535 |
| lnc-DUSP10-7:1    | -1.11452 | 3.07124  | -2.76893 | 0.03528  | 0.202502 | -3.90535 |
| NONHSAT164390.1   | 1.547362 | 3.217014 | 2.768705 | 0.035291 | 0.202537 | -3.90565 |
| lnc-C3orf58-4:1   | -1.17341 | 1.729222 | -2.76852 | 0.035299 | 0.202572 | -3.90589 |
| MSTRG.9702.1      | -1.11338 | 2.469581 | -2.76816 | 0.035315 | 0.202633 | -3.90638 |
| NONHSAT205759.1   | 1.731923 | 3.38223  | 2.768097 | 0.035318 | 0.202635 | -3.90646 |
| NONHSAT174569.1   | -1.23031 | 3.709106 | -2.76757 | 0.035341 | 0.202656 | -3.90715 |
| NONHSAT167611.1   | -1.50454 | 2.840233 | -2.76757 | 0.035341 | 0.202656 | -3.90715 |
| NONHSAT179604.1   | -1.01163 | 4.310155 | -2.76755 | 0.035342 | 0.202656 | -3.90718 |
| lnc-TC2N-3:1      | -1.18854 | 5.163458 | -2.76691 | 0.03537  | 0.202754 | -3.90802 |
| lnc-SLC28A1-3:1   | -1.31055 | 3.012793 | -2.76659 | 0.035385 | 0.202825 | -3.90845 |
| LINC02322:6       | 1.318192 | 3.962253 | 2.766247 | 0.0354   | 0.202855 | -3.9089  |
| lnc-UBE2E3-4:1    | -1.82977 | 3.469365 | -2.76556 | 0.035431 | 0.202965 | -3.9098  |
| NONHSAT201779.1   | -1.19806 | 1.941528 | -2.76533 | 0.035441 | 0.202985 | -3.91011 |
| ENST00000649665.1 | 1.721945 | 2.573641 | 2.764966 | 0.035457 | 0.203012 | -3.9106  |
| NONHSAT214965.1   | 1.330494 | 2.796303 | 2.764847 | 0.035463 | 0.203029 | -3.91075 |
| LINC01226:10      | 1.233151 | 3.852575 | 2.764389 | 0.035483 | 0.203107 | -3.91136 |
| NONHSAT178395.1   | -1.17589 | 2.329493 | -2.76307 | 0.035543 | 0.203278 | -3.91311 |
| lnc-FAM207A-5:1   | -1.22326 | 2.690702 | -2.76264 | 0.035562 | 0.203321 | -3.91367 |
| NONHSAT179398.1   | 1.02168  | 5.525582 | 2.762557 | 0.035565 | 0.203321 | -3.91378 |
| LINC00620:11      | 1.372286 | 3.683596 | 2.762201 | 0.035581 | 0.203374 | -3.91425 |
| MSTRG.51248.1     | 1.421718 | 3.557578 | 2.762156 | 0.035583 | 0.203374 | -3.91431 |
| NONHSAT221592.1   | 1.425334 | 2.302415 | 2.762079 | 0.035587 | 0.203382 | -3.91441 |
| NONHSAT182371.1   | 1.090262 | 2.318809 | 2.76195  | 0.035593 | 0.203392 | -3.91458 |
| NONHSAT167634.1   | 1.175414 | 1.716161 | 2.761842 | 0.035598 | 0.203408 | -3.91473 |
| MSTRG.62122.1     | 1.130166 | 1.759722 | 2.761399 | 0.035618 | 0.203473 | -3.91531 |
| MSTRG.38714.3     | 1.169171 | 5.560516 | 2.761319 | 0.035621 | 0.203473 | -3.91542 |
| MSTRG.72700.1     | -1.12523 | 1.954636 | -2.75902 | 0.035725 | 0.20372  | -3.91846 |
| NONHSAT202134.1   | -1.12422 | 4.042662 | -2.7578  | 0.03578  | 0.203957 | -3.92007 |
| NONHSAT191331.1   | -1.45347 | 2.588898 | -2.75744 | 0.035796 | 0.20399  | -3.92055 |
| NONHSAT206541.1   | 1.039495 | 1.981034 | 2.757064 | 0.035813 | 0.203999 | -3.92105 |
| MSTRG.52476.1     | 1.125165 | 2.313594 | 2.756592 | 0.035834 | 0.204091 | -3.92167 |
| T158189           | 1.504589 | 2.159838 | 2.756423 | 0.035842 | 0.204123 | -3.9219  |
| lnc-FAM92A-2:2    | -1.30616 | 3.631098 | -2.75604 | 0.035859 | 0.204154 | -3.9224  |
| LINC01105:12      | 1.079568 | 2.987208 | 2.755084 | 0.035903 | 0.204307 | -3.92367 |
| NONHSAT178303.1   | 2.041104 | 5.598493 | 2.754726 | 0.035919 | 0.20432  | -3.92414 |
| ENST00000669514.1 | 1.074296 | 5.54112  | 2.754708 | 0.03592  | 0.20432  | -3.92416 |
| NR_120650         | 1.662671 | 2.638603 | 2.754514 | 0.035929 | 0.204327 | -3.92442 |
| lnc-CELSR1-2:3    | 1.153313 | 1.779405 | 2.754329 | 0.035937 | 0.204348 | -3.92467 |
| NONHSAT167675.1   | 1.10549  | 4.269257 | 2.753643 | 0.035968 | 0.204414 | -3.92557 |
| NONHSAT176558.1   | 1.808147 | 2.796878 | 2.753466 | 0.035976 | 0.204414 | -3.92581 |
| NONHSAT157362.1   | 1.016112 | 2.355894 | 2.753401 | 0.035979 | 0.204419 | -3.92589 |
| NONHSAT167252.1   | 1.258078 | 2.162443 | 2.75089  | 0.036094 | 0.204805 | -3.92922 |
| ENST00000658911.1 | -1.32886 | 1.88385  | -2.75047 | 0.036113 | 0.204865 | -3.92977 |
| MSTRG.20193.11    | 1.210729 | 2.061174 | 2.750259 | 0.036122 | 0.204875 | -3.93005 |
| ENST00000657329.1 | 1.035189 | 2.148787 | 2.749774 | 0.036145 | 0.204932 | -3.93069 |
| MSTRG.49299.3     | -1.0958  | 3.941936 | -2.74959 | 0.036153 | 0.204942 | -3.93094 |



|                   |          |          |          |          |          |          |
|-------------------|----------|----------|----------|----------|----------|----------|
| lnc-SLC12A8-4:1   | -1.19527 | 4.313615 | -2.7494  | 0.036162 | 0.204972 | -3.9312  |
| lnc-OR56A3-1:1    | 1.434075 | 2.945615 | 2.749103 | 0.036175 | 0.205015 | -3.93158 |
| NONHSAT197603.1   | 1.423624 | 2.834618 | 2.748868 | 0.036186 | 0.205021 | -3.93189 |
| NONHSAT187598.1   | 1.909552 | 4.738349 | 2.748854 | 0.036187 | 0.205021 | -3.93191 |
| MSTRG.38686.4     | 1.264846 | 4.370605 | 2.748775 | 0.03619  | 0.205029 | -3.93202 |
| NONHSAT188086.1   | 1.216178 | 2.125175 | 2.748437 | 0.036206 | 0.205092 | -3.93246 |
| MSTRG.43870.19    | 1.147597 | 4.346901 | 2.747719 | 0.036239 | 0.205188 | -3.93342 |
| lnc-SERTM2-5:1    | -1.20973 | 3.138624 | -2.74677 | 0.036282 | 0.205331 | -3.93468 |
| ENST00000657346.1 | 1.025705 | 2.131669 | 2.746408 | 0.036299 | 0.205401 | -3.93515 |
| LINC02360:5       | -1.02592 | 1.98461  | -2.74593 | 0.036321 | 0.205491 | -3.93579 |
| lnc-DPPA4-1:2     | 1.238841 | 7.914297 | 2.74586  | 0.036324 | 0.205491 | -3.93588 |
| ENST00000451697.1 | 1.629301 | 3.179839 | 2.745601 | 0.036336 | 0.20553  | -3.93622 |
| lnc-LECT2-2:1     | -1.19875 | 5.698202 | -2.74496 | 0.036365 | 0.205627 | -3.93707 |
| NONHSAT161564.1   | 1.046937 | 1.790092 | 2.744831 | 0.036371 | 0.205627 | -3.93724 |
| NONHSAT150603.1   | -1.28546 | 4.958814 | -2.74469 | 0.036378 | 0.205629 | -3.93743 |
| NONHSAT165018.1   | 1.017594 | 1.851426 | 2.744639 | 0.03638  | 0.205631 | -3.93749 |
| ENST00000560034.1 | -1.37455 | 5.64066  | -2.74454 | 0.036385 | 0.205641 | -3.93763 |
| ENST00000665850.1 | -1.06978 | 3.321025 | -2.74438 | 0.036392 | 0.205663 | -3.93783 |
| NONHSAT187986.1   | -1.17053 | 3.030821 | -2.74412 | 0.036404 | 0.205719 | -3.93818 |
| lnc-HECTD2-1:1    | -1.47878 | 3.372808 | -2.74399 | 0.03641  | 0.205731 | -3.93836 |
| T040935           | -1.52368 | 2.879366 | -2.74388 | 0.036415 | 0.205736 | -3.9385  |
| lnc-FOXQ1-26:1    | -1.08469 | 2.689964 | -2.74347 | 0.036434 | 0.205818 | -3.93904 |
| lnc-TFAP2E-7:1    | 1.382944 | 3.810291 | 2.743433 | 0.036436 | 0.205818 | -3.93909 |
| lnc-PRKACB-7:1    | -1.0075  | 1.89822  | -2.74326 | 0.036444 | 0.205828 | -3.93932 |
| NONHSAT174247.1   | 1.123784 | 1.685638 | 2.74305  | 0.036453 | 0.205848 | -3.9396  |
| NONHSAT163745.1   | -1.00984 | 2.53369  | -2.74287 | 0.036461 | 0.205883 | -3.93983 |
| lnc-FCGR3B-4:11   | 1.077571 | 3.036038 | 2.742464 | 0.03648  | 0.205966 | -3.94037 |
| MSTRG.26270.2     | 1.789254 | 3.076605 | 2.741211 | 0.036538 | 0.206186 | -3.94203 |
| NONHSAT164633.1   | -1.02578 | 1.769307 | -2.74118 | 0.03654  | 0.206186 | -3.94207 |
| lnc-IFNK-5:1      | 1.0897   | 3.782859 | 2.740973 | 0.036549 | 0.206217 | -3.94235 |
| MSTRG.65860.1     | -1.29716 | 2.075273 | -2.74047 | 0.036573 | 0.206242 | -3.94302 |
| lnc-PRPF18-12:1   | -1.01774 | 3.603211 | -2.74005 | 0.036592 | 0.206307 | -3.94357 |
| lnc-GLUD1-1:1     | -1.18025 | 4.630023 | -2.73955 | 0.036615 | 0.206391 | -3.94423 |
| lnc-MSH2-1:4      | 1.041424 | 7.804069 | 2.738982 | 0.036641 | 0.206478 | -3.94498 |
| lnc-GCNT2-5:1     | -1.00204 | 8.438896 | -2.73791 | 0.036691 | 0.206614 | -3.94641 |
| lnc-ACKR3-7:1     | 1.570293 | 3.171026 | 2.737415 | 0.036714 | 0.206652 | -3.94706 |
| NONHSAT166827.1   | -1.06798 | 1.946558 | -2.73734 | 0.036718 | 0.206652 | -3.94716 |
| NONHSAT204280.1   | -1.13954 | 1.648236 | -2.73688 | 0.036739 | 0.206687 | -3.94777 |
| lnc-MBL2-6:2      | -1.09795 | 5.553179 | -2.73675 | 0.036745 | 0.206703 | -3.94794 |
| ENST00000587836.1 | -1.23353 | 2.618852 | -2.73657 | 0.036754 | 0.206715 | -3.94818 |
| lnc-IRF1-7:1      | -1.06715 | 4.03354  | -2.73638 | 0.036762 | 0.206715 | -3.94843 |
| lnc-CCDC57-3:1    | -1.27603 | 3.25092  | -2.73629 | 0.036766 | 0.206725 | -3.94855 |
| lnc-GPR27-6:1     | 1.35769  | 2.279972 | 2.735251 | 0.036815 | 0.206836 | -3.94993 |
| lnc-CXCL12-5:1    | -1.18778 | 3.628701 | -2.7352  | 0.036817 | 0.206836 | -3.94999 |
| ENST00000671426.1 | 1.631699 | 2.639453 | 2.73498  | 0.036828 | 0.206861 | -3.95029 |
| MSTRG.56553.1     | -1.37087 | 2.652076 | -2.73462 | 0.036844 | 0.206909 | -3.95076 |
| MSTRG.69335.1     | 1.645288 | 2.630896 | 2.734238 | 0.036862 | 0.206964 | -3.95127 |
| lnc-POU4F2-1:1    | 1.555782 | 2.225836 | 2.733354 | 0.036904 | 0.207102 | -3.95244 |

|                      |          |          |          |          |          |          |
|----------------------|----------|----------|----------|----------|----------|----------|
| NONHSAT163851.1      | 1.033201 | 3.43989  | 2.73292  | 0.036924 | 0.20712  | -3.95302 |
| MSTRG.45900.1        | 1.327981 | 3.67713  | 2.732895 | 0.036925 | 0.20712  | -3.95305 |
| NONHSAT154287.1      | -1.00855 | 4.168985 | -2.73243 | 0.036947 | 0.20722  | -3.95367 |
| MSTRG.51866.2        | -1.23748 | 2.857917 | -2.7323  | 0.036953 | 0.207225 | -3.95383 |
| NONHSAT175302.1      | 1.026058 | 5.240939 | 2.731404 | 0.036995 | 0.207373 | -3.95503 |
| NONHSAT201967.1      | 1.263641 | 2.351088 | 2.731303 | 0.037    | 0.207377 | -3.95516 |
| NONHSAT191858.1      | 1.362359 | 5.939781 | 2.730672 | 0.037029 | 0.207473 | -3.956   |
| lnc-ZFYVE1-2:1       | 1.100741 | 2.0657   | 2.73049  | 0.037038 | 0.207486 | -3.95624 |
| NONHSAT171806.1      | 1.20793  | 2.594249 | 2.730193 | 0.037052 | 0.207532 | -3.95663 |
| NONHSAT183119.1      | -1.20219 | 1.698592 | -2.73018 | 0.037052 | 0.207532 | -3.95664 |
| ENST00000580524.1    | 1.516922 | 2.530071 | 2.730071 | 0.037057 | 0.207542 | -3.95679 |
| lnc-NDFIP2-15:1      | 1.178139 | 2.099017 | 2.729943 | 0.037063 | 0.207546 | -3.95696 |
| lnc-EPB42-3:1        | 1.265646 | 2.637487 | 2.729908 | 0.037065 | 0.207546 | -3.95701 |
| lnc-CD109-8:1        | 1.715069 | 5.862136 | 2.728477 | 0.037132 | 0.207701 | -3.95891 |
| lnc-LAD1-1:2         | 1.691562 | 2.46595  | 2.728449 | 0.037134 | 0.207701 | -3.95894 |
| NR_104655            | 1.514224 | 1.863154 | 2.727096 | 0.037197 | 0.207896 | -3.96074 |
| ENST00000659604.1    | 1.358327 | 1.835196 | 2.726941 | 0.037205 | 0.207913 | -3.96094 |
| lnc-GLIPR1L1-1:7     | 1.504766 | 3.018543 | 2.726654 | 0.037218 | 0.207949 | -3.96132 |
| lnc-NPHP3-ACAD11-1:2 | 1.000284 | 7.220766 | 2.726341 | 0.037233 | 0.208014 | -3.96174 |
| NONHSAT218514.1      | 1.396166 | 2.725479 | 2.725715 | 0.037263 | 0.208106 | -3.96257 |
| NONHSAT179949.1      | 1.185263 | 6.865972 | 2.725642 | 0.037266 | 0.208106 | -3.96266 |
| lnc-CERK-10:3        | 1.336489 | 2.823248 | 2.725421 | 0.037276 | 0.208107 | -3.96296 |
| lnc-NXP2-9:1         | 1.126125 | 1.647252 | 2.723687 | 0.037358 | 0.208306 | -3.96526 |
| NONHSAT205944.1      | 1.330928 | 2.218799 | 2.722561 | 0.037412 | 0.208459 | -3.96675 |
| ENST00000663964.1    | 1.212098 | 2.072004 | 2.722412 | 0.037419 | 0.208487 | -3.96695 |
| NONHSAT154367.1      | -1.16431 | 1.665224 | -2.72214 | 0.037432 | 0.208537 | -3.9673  |
| ENST00000653890.1    | 1.299191 | 2.924863 | 2.721607 | 0.037457 | 0.208585 | -3.96802 |
| lnc-URGCP-MRPS24-5:3 | -1.06682 | 2.79586  | -2.72122 | 0.037476 | 0.208676 | -3.96853 |
| NONHSAT224528.1      | 1.766497 | 3.33326  | 2.721095 | 0.037482 | 0.208683 | -3.9687  |
| NONHSAT205565.1      | -1.08238 | 3.32587  | -2.71938 | 0.037563 | 0.208848 | -3.97097 |
| lnc-FAM122C-3:1      | 1.444758 | 2.972334 | 2.719222 | 0.037571 | 0.208859 | -3.97118 |
| ENST00000510059.1    | 1.051611 | 3.280959 | 2.717268 | 0.037664 | 0.209156 | -3.97377 |
| NR_038844            | -1.43957 | 3.063725 | -2.71626 | 0.037712 | 0.209287 | -3.97511 |
| lnc-SALL2-2:3        | -1.10049 | 3.55963  | -2.71581 | 0.037734 | 0.209326 | -3.9757  |
| lnc-BARHL2-1:2       | -1.0456  | 3.188041 | -2.7156  | 0.037744 | 0.20936  | -3.97599 |
| NONHSAT198987.1      | -1.06655 | 2.473524 | -2.71543 | 0.037752 | 0.209381 | -3.97621 |
| NONHSAT202694.1      | 1.484461 | 4.18516  | 2.715176 | 0.037764 | 0.209438 | -3.97655 |
| MSTRG.46731.1        | 1.026404 | 3.554721 | 2.714419 | 0.0378   | 0.209508 | -3.97755 |
| ENST00000652712.1    | -1.07673 | 2.084779 | -2.71381 | 0.03783  | 0.209593 | -3.97837 |
| lnc-DHDH-1:1         | -1.30416 | 2.00531  | -2.71318 | 0.03786  | 0.209651 | -3.9792  |
| lnc-IKZF1-15:5       | 1.458978 | 3.08249  | 2.712619 | 0.037887 | 0.209703 | -3.97994 |
| ENST00000417513.1    | -1.33708 | 2.661953 | -2.71213 | 0.03791  | 0.209776 | -3.98058 |
| T042458              | 1.218126 | 2.849239 | 2.711975 | 0.037918 | 0.209783 | -3.98079 |
| NR_125389            | -1.52211 | 3.00251  | -2.71193 | 0.03792  | 0.209783 | -3.98085 |
| ENST00000664712.1    | 1.194351 | 2.265461 | 2.711536 | 0.037939 | 0.209877 | -3.98138 |
| ENST00000531379.1    | -1.20459 | 2.374066 | -2.71132 | 0.037949 | 0.2099   | -3.98166 |

|                   |          |          |          |          |          |          |
|-------------------|----------|----------|----------|----------|----------|----------|
| MSTRG.5887.3      | 1.123681 | 3.932884 | 2.709405 | 0.038042 | 0.210191 | -3.98421 |
| lnc-CD302-1:1     | -1.20578 | 4.079417 | -2.70906 | 0.038059 | 0.210236 | -3.98467 |
| lnc-ERICH1-11:1   | 1.1585   | 9.880765 | 2.708925 | 0.038065 | 0.210245 | -3.98484 |
| MSTRG.10303.8     | -1.26222 | 1.718008 | -2.70883 | 0.03807  | 0.210245 | -3.98497 |
| NONHSAT177953.1   | 1.133804 | 3.931021 | 2.708739 | 0.038074 | 0.210245 | -3.98509 |
| ENST00000561979.1 | -1.0527  | 1.632702 | -2.70823 | 0.038099 | 0.210291 | -3.98577 |
| NONHSAT188245.1   | 1.523442 | 6.087063 | 2.70812  | 0.038104 | 0.210293 | -3.98591 |
| lnc-PFKP-11:5     | -1.2234  | 2.462145 | -2.70812 | 0.038104 | 0.210293 | -3.98591 |
| NONHSAT171422.1   | 1.356097 | 4.557863 | 2.707258 | 0.038146 | 0.210454 | -3.98706 |
| NONHSAT149624.1   | 1.050677 | 4.14976  | 2.706275 | 0.038193 | 0.210579 | -3.98836 |
| ENST00000655799.1 | 1.488917 | 2.851105 | 2.706121 | 0.038201 | 0.210597 | -3.98857 |
| NONHSAT186991.1   | -1.16155 | 1.772984 | -2.70563 | 0.038225 | 0.210636 | -3.98922 |
| NONHSAT149731.1   | 1.116714 | 6.298148 | 2.705216 | 0.038245 | 0.210701 | -3.98977 |
| NONHSAT164752.1   | 1.010638 | 4.719446 | 2.704678 | 0.038271 | 0.210776 | -3.99048 |
| MSTRG.36569.1     | -1.22929 | 3.494909 | -2.70311 | 0.038347 | 0.210975 | -3.99257 |
| ENST00000301683.7 | -1.45866 | 3.917071 | -2.70308 | 0.038349 | 0.210975 | -3.99261 |
| ENST00000662918.1 | 1.437201 | 2.188098 | 2.702575 | 0.038373 | 0.211055 | -3.99327 |
| lnc-SMYD2-1:1     | -1.23065 | 2.724728 | -2.70256 | 0.038374 | 0.211055 | -3.9933  |
| lnc-LTN1-1:1      | -1.20154 | 3.394386 | -2.70237 | 0.038383 | 0.211067 | -3.99355 |
| NONHSAT187452.1   | 1.598452 | 2.99282  | 2.702046 | 0.038399 | 0.211136 | -3.99398 |
| lnc-HABP4-2:7     | 1.044356 | 7.940066 | 2.701999 | 0.038401 | 0.211137 | -3.99404 |
| MSTRG.21155.1     | 1.386516 | 2.732777 | 2.70173  | 0.038415 | 0.211187 | -3.9944  |
| lnc-BCAT1-6:1     | 1.071001 | 3.510869 | 2.701626 | 0.03842  | 0.211203 | -3.99453 |
| LINC02020:25      | 1.644641 | 3.132126 | 2.701352 | 0.038433 | 0.211242 | -3.9949  |
| ENST00000668827.1 | 1.503328 | 2.272705 | 2.701252 | 0.038438 | 0.211243 | -3.99503 |
| lnc-CUX2-1:1      | -1.4322  | 2.760652 | -2.70073 | 0.038464 | 0.211318 | -3.99573 |
| MSTRG.44627.1     | -1.23964 | 1.753852 | -2.70055 | 0.038472 | 0.211343 | -3.99597 |
| MSTRG.43249.1     | 1.071431 | 1.984961 | 2.700287 | 0.038485 | 0.211364 | -3.99631 |
| NONHSAT160653.1   | 1.629509 | 3.281055 | 2.69939  | 0.038529 | 0.211468 | -3.9975  |
| NONHSAT177546.1   | 1.081996 | 3.992653 | 2.699003 | 0.038548 | 0.211528 | -3.99802 |
| NONHSAT170034.1   | 1.205552 | 2.578718 | 2.698459 | 0.038575 | 0.211614 | -3.99874 |
| ENST00000660770.1 | 1.142752 | 2.270749 | 2.698355 | 0.03858  | 0.211622 | -3.99888 |
| lnc-TNK1-2:1      | -1.38992 | 1.805049 | -2.69824 | 0.038585 | 0.211623 | -3.99903 |
| T022079           | 1.157655 | 3.90012  | 2.698118 | 0.038591 | 0.211628 | -3.99919 |
| lnc-HECA-12:2     | 1.025559 | 3.147196 | 2.696942 | 0.038649 | 0.211753 | -4.00076 |
| lnc-CHIC1-7:1     | 1.204197 | 5.069862 | 2.696814 | 0.038655 | 0.211753 | -4.00093 |
| NONHSAT210535.1   | 2.052978 | 3.511781 | 2.696771 | 0.038657 | 0.211753 | -4.00098 |
| NONHSAT152756.1   | 1.291434 | 2.841505 | 2.696728 | 0.03866  | 0.211753 | -4.00104 |
| NR_126002         | -1.63621 | 2.814971 | -2.69662 | 0.038665 | 0.211753 | -4.00119 |
| lnc-ITGB8-12:1    | -1.12379 | 4.136673 | -2.69655 | 0.038668 | 0.211753 | -4.00127 |
| ENST00000586176.1 | 1.035979 | 2.40397  | 2.696369 | 0.038677 | 0.211776 | -4.00152 |
| lnc-MYT1L-1:4     | 1.658692 | 2.675408 | 2.696219 | 0.038685 | 0.211794 | -4.00172 |
| NONHSAT185618.1   | 1.016016 | 1.927888 | 2.695577 | 0.038716 | 0.211885 | -4.00257 |
| lnc-ZFP64-4:1     | 1.274743 | 3.730307 | 2.693986 | 0.038795 | 0.212143 | -4.00468 |
| lnc-ZDHHC7-3:1    | 1.04881  | 4.387323 | 2.693244 | 0.038831 | 0.212216 | -4.00567 |
| lnc-GBE1-5:8      | -1.10467 | 3.144493 | -2.69249 | 0.038869 | 0.212317 | -4.00667 |
| ENST00000606489.1 | 1.362881 | 8.668282 | 2.69117  | 0.038934 | 0.212508 | -4.00842 |
| NONHSAT156616.1   | -1.0074  | 2.240257 | -2.69098 | 0.038943 | 0.212517 | -4.00867 |

|                   |          |          |          |          |          |          |
|-------------------|----------|----------|----------|----------|----------|----------|
| lnc-SLC35G2-5:1   | 1.217987 | 3.362783 | 2.690927 | 0.038946 | 0.21252  | -4.00875 |
| lnc-FOXO4-3:1     | 1.337278 | 2.892023 | 2.69065  | 0.03896  | 0.212561 | -4.00912 |
| lnc-SERPINB1-1:10 | -1.03196 | 3.970862 | -2.69033 | 0.038976 | 0.212602 | -4.00954 |
| MSTRG.39327.26    | 1.202714 | 2.198413 | 2.690167 | 0.038984 | 0.212617 | -4.00976 |
| lnc-GSPT2-2:1     | -1.19294 | 3.90395  | -2.68986 | 0.038999 | 0.212672 | -4.01017 |
| NONHSAT221226.1   | -1.15598 | 2.185138 | -2.68936 | 0.039023 | 0.212737 | -4.01082 |
| ENST00000418426.1 | 1.353328 | 1.812563 | 2.689052 | 0.039039 | 0.212763 | -4.01124 |
| ENST00000648642.1 | -1.31139 | 2.797498 | -2.68892 | 0.039045 | 0.212786 | -4.01141 |
| lnc-C12orf74-5:5  | 1.078133 | 2.412678 | 2.688796 | 0.039052 | 0.21281  | -4.01158 |
| MSTRG.21408.1     | 1.54291  | 2.145559 | 2.688664 | 0.039058 | 0.212813 | -4.01176 |
| NONHSAT157688.1   | 1.448296 | 1.876518 | 2.688581 | 0.039062 | 0.212813 | -4.01187 |
| NONHSAT217091.1   | 1.046896 | 1.95304  | 2.687963 | 0.039093 | 0.21294  | -4.01269 |
| ENST00000657226.1 | -1.02673 | 5.231741 | -2.68793 | 0.039095 | 0.21294  | -4.01273 |
| NONHSAT153465.1   | -1.52807 | 2.921592 | -2.68763 | 0.03911  | 0.21301  | -4.01313 |
| NONHSAT193349.1   | 1.005943 | 5.071122 | 2.687343 | 0.039124 | 0.213065 | -4.01351 |
| NONHSAT209903.1   | 1.164132 | 2.052279 | 2.687151 | 0.039134 | 0.213106 | -4.01377 |
| MSTRG.47137.1     | 1.117682 | 4.521971 | 2.686879 | 0.039147 | 0.21314  | -4.01413 |
| NONHSAT193073.1   | 1.212712 | 2.904928 | 2.686854 | 0.039148 | 0.21314  | -4.01416 |
| NONHSAT210837.1   | 1.131012 | 1.653905 | 2.686759 | 0.039153 | 0.213143 | -4.01429 |
| ENST00000585243.1 | -1.30313 | 4.657163 | -2.68603 | 0.03919  | 0.213273 | -4.01526 |
| lnc-ANGPTL2-5:1   | 1.011318 | 11.56168 | 2.685706 | 0.039206 | 0.213329 | -4.01569 |
| ENST00000392385.2 | 1.350207 | 2.81678  | 2.685472 | 0.039217 | 0.213355 | -4.016   |
| ENST00000544089.1 | 1.42292  | 2.176923 | 2.685364 | 0.039223 | 0.213359 | -4.01614 |
| lnc-CSE1L-2:1     | 1.530806 | 3.198278 | 2.685038 | 0.039239 | 0.213396 | -4.01658 |
| MSTRG.65705.1     | 1.742845 | 3.330086 | 2.685022 | 0.03924  | 0.213396 | -4.0166  |
| ENST00000567624.1 | -1.19776 | 2.959741 | -2.68486 | 0.039248 | 0.213408 | -4.01682 |
| lnc-SLC9A6-1:3    | -1.14699 | 2.931438 | -2.68485 | 0.039248 | 0.213408 | -4.01683 |
| NONHSAT158271.1   | 1.555368 | 3.07264  | 2.684808 | 0.03925  | 0.213408 | -4.01688 |
| NONHSAT163195.1   | 1.212573 | 2.521541 | 2.684009 | 0.03929  | 0.213533 | -4.01794 |
| NONHSAT206663.1   | 1.021553 | 2.202608 | 2.683712 | 0.039305 | 0.213581 | -4.01834 |
| MSTRG.24169.1     | -1.49283 | 3.059926 | -2.68366 | 0.039308 | 0.213581 | -4.01841 |
| lnc-CAMKK2-2:1    | -1.15287 | 3.768674 | -2.68223 | 0.03938  | 0.213719 | -4.02032 |
| lnc-RNASEH2B-7:1  | 1.251883 | 2.092289 | 2.681359 | 0.039423 | 0.213829 | -4.02147 |
| NONHSAT152513.1   | -1.09053 | 4.534618 | -2.68078 | 0.039452 | 0.213909 | -4.02224 |
| lnc-EMILIN3-2:1   | -1.06452 | 2.627581 | -2.68071 | 0.039456 | 0.213912 | -4.02232 |
| MSTRG.53121.1     | 1.109179 | 2.865637 | 2.68042  | 0.03947  | 0.213924 | -4.02272 |
| NONHSAT156173.1   | 1.42379  | 2.479359 | 2.68006  | 0.039488 | 0.213999 | -4.0232  |
| NONHSAT216820.1   | -1.08818 | 2.624179 | -2.67996 | 0.039494 | 0.214015 | -4.02333 |
| NONHSAT189869.1   | 1.304033 | 2.285221 | 2.679869 | 0.039498 | 0.214028 | -4.02345 |
| lnc-SPRY4-1:1     | 1.134117 | 1.861094 | 2.679251 | 0.039529 | 0.214136 | -4.02427 |
| NONHSAT149441.1   | -1.17308 | 3.997056 | -2.67902 | 0.039541 | 0.214144 | -4.02458 |
| NONHSAT158086.1   | 1.495585 | 2.37996  | 2.678572 | 0.039563 | 0.214193 | -4.02517 |
| lnc-CACYBP-3:1    | -1.11247 | 2.434825 | -2.67795 | 0.039595 | 0.21428  | -4.026   |
| NONHSAT186509.1   | 1.185663 | 1.679918 | 2.677899 | 0.039597 | 0.21428  | -4.02607 |
| ENST00000414896.1 | -1.44854 | 3.047062 | -2.67601 | 0.039693 | 0.214531 | -4.02859 |
| NONHSAT169649.1   | 1.248651 | 3.557048 | 2.675876 | 0.0397   | 0.214555 | -4.02876 |
| NR_033977         | 1.213898 | 2.57129  | 2.6758   | 0.039703 | 0.214564 | -4.02886 |
| MSTRG.29072.1     | -1.02656 | 3.831564 | -2.67482 | 0.039753 | 0.214743 | -4.03016 |

|                   |          |          |          |          |          |          |
|-------------------|----------|----------|----------|----------|----------|----------|
| ENST00000617323.4 | 1.224346 | 3.641941 | 2.673365 | 0.039827 | 0.214942 | -4.0321  |
| MSTRG.71724.1     | -1.34662 | 3.254915 | -2.67319 | 0.039836 | 0.214942 | -4.03234 |
| ENST00000414098.2 | -1.19449 | 2.775835 | -2.67305 | 0.039843 | 0.214956 | -4.03252 |
| T314610           | 1.592173 | 3.089888 | 2.672725 | 0.039859 | 0.214985 | -4.03295 |
| lnc-SERPINI1-17:4 | 1.55547  | 3.088238 | 2.672432 | 0.039874 | 0.215    | -4.03334 |
| lnc-CPS1-5:2      | 1.311918 | 2.859304 | 2.672374 | 0.039877 | 0.215    | -4.03342 |
| NR_121639         | 1.297826 | 2.146964 | 2.67194  | 0.039899 | 0.21504  | -4.034   |
| NONHSAT187278.1   | 1.067326 | 2.141164 | 2.671723 | 0.03991  | 0.215077 | -4.03428 |
| NONHSAT187968.1   | 1.044411 | 2.548267 | 2.671701 | 0.039911 | 0.215077 | -4.03431 |
| NONHSAT178146.1   | -1.78057 | 2.25875  | -2.6712  | 0.039937 | 0.215179 | -4.03498 |
| NONHSAT166117.1   | 1.281812 | 2.20718  | 2.670934 | 0.03995  | 0.21523  | -4.03534 |
| NONHSAT207337.1   | 1.750237 | 2.700885 | 2.670392 | 0.039978 | 0.215343 | -4.03606 |
| NONHSAT197162.1   | -1.11281 | 1.727482 | -2.67002 | 0.039997 | 0.215378 | -4.03656 |
| MSTRG.52659.1     | 1.569768 | 2.878512 | 2.669253 | 0.040036 | 0.215518 | -4.03757 |
| ENST00000670979.1 | -1.33628 | 2.612474 | -2.66921 | 0.040038 | 0.215518 | -4.03762 |
| lnc-P4HA2-3:3     | -1.13644 | 1.892654 | -2.6685  | 0.040075 | 0.215634 | -4.03857 |
| NONHSAT164467.1   | 1.401186 | 2.665124 | 2.668437 | 0.040078 | 0.21564  | -4.03866 |
| NONHSAT168350.1   | -1.20008 | 2.701482 | -2.6675  | 0.040126 | 0.215795 | -4.03991 |
| NONHSAT151784.1   | -1.289   | 2.336397 | -2.66688 | 0.040158 | 0.215885 | -4.04074 |
| NONHSAT199944.1   | 1.675694 | 4.697678 | 2.666597 | 0.040172 | 0.215927 | -4.04111 |
| lnc-GAPT-9:5      | -1.48439 | 2.962167 | -2.66645 | 0.040179 | 0.215933 | -4.0413  |
| NONHSAT207923.1   | 1.088821 | 4.351333 | 2.666222 | 0.040191 | 0.215949 | -4.04161 |
| NONHSAT158216.1   | 1.462034 | 2.933063 | 2.666209 | 0.040192 | 0.215949 | -4.04162 |
| NONHSAT215132.1   | 1.414256 | 2.580139 | 2.666087 | 0.040198 | 0.215953 | -4.04179 |
| NONHSAT211798.1   | 1.11046  | 3.950748 | 2.665688 | 0.040219 | 0.215953 | -4.04232 |
| MSTRG.49528.3     | 1.891633 | 3.278827 | 2.665627 | 0.040222 | 0.215953 | -4.0424  |
| NONHSAT222629.1   | 1.355813 | 2.476254 | 2.665559 | 0.040225 | 0.215958 | -4.04249 |
| lnc-TIMM21-12:1   | -1.64011 | 2.651365 | -2.66522 | 0.040243 | 0.215958 | -4.04294 |
| NONHSAT167483.1   | 1.010088 | 7.266028 | 2.665165 | 0.040245 | 0.215958 | -4.04301 |
| NONHSAT218284.1   | 1.214868 | 5.427507 | 2.66514  | 0.040247 | 0.215958 | -4.04305 |
| NONHSAT186781.1   | 1.048219 | 4.32868  | 2.665072 | 0.04025  | 0.215958 | -4.04314 |
| NONHSAT182975.1   | -1.3362  | 1.731533 | -2.66494 | 0.040257 | 0.215958 | -4.04332 |
| NONHSAT168400.1   | 1.159754 | 2.61446  | 2.664906 | 0.040259 | 0.215958 | -4.04336 |
| NONHSAT149630.1   | 1.142639 | 2.00268  | 2.664505 | 0.040279 | 0.216021 | -4.04389 |
| NONHSAT186205.1   | 1.045087 | 2.118082 | 2.664443 | 0.040283 | 0.216027 | -4.04397 |
| ENST00000429282.5 | 1.41548  | 3.243825 | 2.664362 | 0.040287 | 0.216038 | -4.04408 |
| ENST00000652118.1 | -1.04363 | 2.238955 | -2.66422 | 0.040294 | 0.216066 | -4.04428 |
| NONHSAT173088.1   | 1.443546 | 2.469276 | 2.663836 | 0.040314 | 0.216125 | -4.04478 |
| NONHSAT200298.1   | 1.159682 | 2.188804 | 2.663785 | 0.040316 | 0.216128 | -4.04485 |
| ENST00000560446.1 | 1.814522 | 2.558917 | 2.663725 | 0.04032  | 0.216133 | -4.04493 |
| NONHSAT205518.1   | 1.232865 | 2.480317 | 2.663488 | 0.040332 | 0.216164 | -4.04525 |
| T226787           | 1.555576 | 4.097929 | 2.663058 | 0.040354 | 0.216259 | -4.04582 |
| lnc-COMMD6-1:1    | -1.34401 | 3.361194 | -2.66238 | 0.040389 | 0.216401 | -4.04673 |
| ENST00000652912.1 | -1.14893 | 1.9525   | -2.66173 | 0.040423 | 0.216481 | -4.04759 |
| MYCNUT:3          | 1.257194 | 2.360079 | 2.661637 | 0.040427 | 0.216491 | -4.04771 |
| lnc-PLXDC1-3:2    | 1.503348 | 3.142785 | 2.66157  | 0.040431 | 0.216498 | -4.0478  |
| NR_125920         | 1.608236 | 5.410829 | 2.660904 | 0.040465 | 0.216557 | -4.04869 |
| T338552           | 1.231862 | 3.902716 | 2.66059  | 0.040481 | 0.216557 | -4.0491  |

|                   |          |          |          |          |          |          |
|-------------------|----------|----------|----------|----------|----------|----------|
| NONHSAT174714.1   | 1.133068 | 2.510037 | 2.660505 | 0.040486 | 0.216557 | -4.04922 |
| T098648           | -1.07692 | 1.787298 | -2.66031 | 0.040495 | 0.216581 | -4.04947 |
| NONHSAT197598.1   | 1.290416 | 2.866061 | 2.65965  | 0.04053  | 0.216707 | -4.05036 |
| T192410           | -1.10197 | 2.189654 | -2.65837 | 0.040596 | 0.216911 | -4.05206 |
| NONHSAT195993.1   | -1.03753 | 1.672608 | -2.658   | 0.040615 | 0.217001 | -4.05255 |
| ENST00000648074.1 | 1.133198 | 3.144414 | 2.657862 | 0.040622 | 0.217006 | -4.05274 |
| NONHSAT211802.1   | 1.524435 | 2.418714 | 2.657666 | 0.040633 | 0.217026 | -4.053   |
| ENST00000574352.1 | 1.361702 | 2.895433 | 2.657434 | 0.040645 | 0.217067 | -4.05331 |
| MSTRG.49784.1     | 1.028593 | 2.668201 | 2.657244 | 0.040654 | 0.217085 | -4.05356 |
| ENST00000621730.1 | -1.19585 | 2.653988 | -2.65713 | 0.040661 | 0.217085 | -4.05372 |
| MSTRG.60809.21    | 1.799146 | 6.368067 | 2.657033 | 0.040665 | 0.217085 | -4.05384 |
| lnc-FH-1:1        | 1.108958 | 3.585323 | 2.656785 | 0.040678 | 0.217085 | -4.05417 |
| lnc-TRAPPC3L-3:1  | -1.07737 | 4.55065  | -2.65676 | 0.040679 | 0.217085 | -4.0542  |
| lnc-KLLN-4:1      | -1.37105 | 2.870389 | -2.65649 | 0.040694 | 0.217105 | -4.05456 |
| NONHSAT219566.1   | -1.10758 | 3.32772  | -2.65577 | 0.040731 | 0.217206 | -4.05552 |
| NONHSAT222150.1   | 1.361142 | 3.841467 | 2.655397 | 0.04075  | 0.217237 | -4.05602 |
| lnc-KIF18A-7:1    | -1.35438 | 2.775956 | -2.65537 | 0.040752 | 0.217237 | -4.05605 |
| lnc-SLC16A1-6:3   | -1.83901 | 2.435222 | -2.65508 | 0.040767 | 0.217255 | -4.05644 |
| MSTRG.36081.1     | -1.10815 | 4.529259 | -2.65425 | 0.04081  | 0.217356 | -4.05755 |
| ENST00000583062.1 | 1.377169 | 2.435125 | 2.654239 | 0.040811 | 0.217356 | -4.05756 |
| lnc-RDH11-5:1     | -1.1732  | 2.046407 | -2.65407 | 0.04082  | 0.217367 | -4.05779 |
| lnc-RBM23-3:2     | -1.52526 | 3.194835 | -2.65347 | 0.040851 | 0.217477 | -4.05859 |
| NONHSAT172078.1   | 1.097415 | 2.954341 | 2.653132 | 0.040869 | 0.217515 | -4.05904 |
| MSTRG.24145.1     | 1.259674 | 2.228958 | 2.652224 | 0.040916 | 0.217645 | -4.06025 |
| lnc-KCNH1-4:1     | 1.421796 | 2.614232 | 2.651969 | 0.040929 | 0.217677 | -4.06059 |
| ENST00000671418.1 | -1.09274 | 1.625166 | -2.65178 | 0.040939 | 0.217695 | -4.06083 |
| T022371           | 1.178169 | 4.824289 | 2.651064 | 0.040977 | 0.217833 | -4.06179 |
| ENST00000661911.1 | 1.079425 | 2.538791 | 2.651046 | 0.040978 | 0.217833 | -4.06182 |
| lnc-GLRX5-2:2     | -1.41164 | 2.136711 | -2.64935 | 0.041066 | 0.218119 | -4.06408 |
| NONHSAT207308.1   | 1.043028 | 6.701918 | 2.648426 | 0.041115 | 0.218246 | -4.06531 |
| lnc-UBP1-5:1      | -1.22934 | 3.590334 | -2.6484  | 0.041116 | 0.218246 | -4.06534 |
| lnc-CHST12-4:2    | -1.42007 | 2.649419 | -2.64821 | 0.041126 | 0.218275 | -4.06559 |
| NONHSAT158090.1   | 1.04522  | 9.965811 | 2.648171 | 0.041128 | 0.218276 | -4.06565 |
| LINC00474:4       | 1.086832 | 3.470603 | 2.647673 | 0.041155 | 0.218369 | -4.06631 |
| NONHSAT203167.1   | 1.11763  | 4.074932 | 2.647383 | 0.04117  | 0.218398 | -4.0667  |
| lnc-ZNF732-10:2   | -1.14463 | 3.446394 | -2.64592 | 0.041247 | 0.218607 | -4.06865 |
| NONHSAT164569.1   | 1.586269 | 2.346862 | 2.645591 | 0.041264 | 0.218645 | -4.06908 |
| NONHSAT193799.1   | 1.066417 | 5.840348 | 2.645101 | 0.04129  | 0.218719 | -4.06974 |
| NONHSAT153627.1   | 1.06521  | 1.97132  | 2.645021 | 0.041294 | 0.21873  | -4.06984 |
| NONHSAT197526.1   | -1.18821 | 1.997924 | -2.64452 | 0.041321 | 0.218824 | -4.07052 |
| lnc-PRDM2-8:1     | 1.154091 | 4.399731 | 2.64407  | 0.041345 | 0.218884 | -4.07111 |
| lnc-NMUR2-4:1     | 1.245581 | 3.000765 | 2.644013 | 0.041348 | 0.218884 | -4.07119 |
| MSTRG.69881.2     | 1.550689 | 3.942096 | 2.643714 | 0.041363 | 0.218916 | -4.07159 |
| NONHSAT187888.1   | -1.02626 | 2.403402 | -2.64362 | 0.041368 | 0.218916 | -4.07171 |
| NONHSAT202688.1   | 1.016129 | 2.815607 | 2.643473 | 0.041376 | 0.218922 | -4.07191 |
| lnc-DOC2B-2:2     | 1.123175 | 3.435631 | 2.643219 | 0.04139  | 0.21897  | -4.07224 |
| ENST00000659612.1 | -1.05884 | 1.639805 | -2.64238 | 0.041434 | 0.219124 | -4.07336 |
| NONHSAT159216.1   | 1.065128 | 4.944504 | 2.641441 | 0.041484 | 0.21924  | -4.07461 |

|                   |          |          |          |          |          |          |
|-------------------|----------|----------|----------|----------|----------|----------|
| lnc-ASB4-7:1      | -1.17676 | 3.548248 | -2.6414  | 0.041486 | 0.21924  | -4.07467 |
| MSTRG.16669.1     | -1.10384 | 6.781655 | -2.6409  | 0.041513 | 0.219322 | -4.07534 |
| MIF-AS1:5         | -1.0445  | 1.922995 | -2.64049 | 0.041534 | 0.219346 | -4.07588 |
| NONHSAT162938.1   | 1.002379 | 2.325786 | 2.640256 | 0.041547 | 0.219376 | -4.07619 |
| NONHSAT221961.1   | 1.245556 | 1.719017 | 2.640077 | 0.041556 | 0.219381 | -4.07643 |
| ENST00000663952.1 | 1.261901 | 4.050906 | 2.640038 | 0.041558 | 0.219381 | -4.07648 |
| MSTRG.61097.1     | -1.02113 | 1.733409 | -2.63997 | 0.041562 | 0.219384 | -4.07657 |
| ENST00000662076.1 | 1.270962 | 4.448362 | 2.639939 | 0.041564 | 0.219384 | -4.07662 |
| NONHSAT183366.1   | -1.07856 | 2.43366  | -2.63989 | 0.041566 | 0.219387 | -4.07668 |
| lnc-NTRK2-2:4     | 1.46658  | 2.406931 | 2.639516 | 0.041586 | 0.219427 | -4.07718 |
| lnc-MPEG1-4:1     | 1.328345 | 2.331131 | 2.639278 | 0.041599 | 0.219458 | -4.0775  |
| lnc-RNF38-1:3     | -1.39333 | 2.652685 | -2.63927 | 0.041599 | 0.219458 | -4.07751 |
| NONHSAT187328.1   | 1.122001 | 1.627903 | 2.638499 | 0.04164  | 0.219582 | -4.07854 |
| lnc-S100B-2:1     | -1.14054 | 3.023845 | -2.63801 | 0.041666 | 0.219622 | -4.07919 |
| lnc-DTWD1-4:1     | -1.10363 | 2.391869 | -2.63792 | 0.041671 | 0.219622 | -4.07931 |
| ENST00000514293.1 | -1.17722 | 3.683313 | -2.63759 | 0.041689 | 0.219624 | -4.07975 |
| NONHSAT166505.1   | -1.05945 | 4.652422 | -2.63699 | 0.041721 | 0.21965  | -4.08055 |
| MSTRG.67002.13    | -1.05121 | 4.511962 | -2.63669 | 0.041736 | 0.219673 | -4.08094 |
| NONHSAT201897.1   | 1.028539 | 6.285318 | 2.636241 | 0.041761 | 0.219746 | -4.08155 |
| lnc-FEV-4:1       | -1.3683  | 5.838674 | -2.63597 | 0.041775 | 0.219811 | -4.08191 |
| MSTRG.56757.1     | 1.335992 | 1.975541 | 2.635858 | 0.041781 | 0.219831 | -4.08206 |
| lnc-ARSG-3:1      | 1.006364 | 2.797573 | 2.635499 | 0.0418   | 0.219897 | -4.08254 |
| MSTRG.1889.1      | -1.04972 | 2.039585 | -2.63485 | 0.041835 | 0.220039 | -4.0834  |
| NONHSAT182761.1   | 1.225032 | 2.086875 | 2.634329 | 0.041863 | 0.220101 | -4.0841  |
| MSTRG.62617.1     | 1.074828 | 2.857294 | 2.633653 | 0.041899 | 0.220223 | -4.085   |
| ENST00000611626.1 | 1.010612 | 1.973059 | 2.633609 | 0.041902 | 0.220223 | -4.08506 |
| lnc-AADACL4-3:1   | -1.42427 | 2.563495 | -2.63336 | 0.041915 | 0.220248 | -4.08539 |
| NONHSAT199599.1   | -1.34516 | 2.899202 | -2.63259 | 0.041956 | 0.220419 | -4.08642 |
| lnc-TGFBR2-7:1    | -1.14533 | 3.662816 | -2.6322  | 0.041977 | 0.220447 | -4.08694 |
| ENST00000641922.1 | 1.528801 | 2.99044  | 2.631873 | 0.041995 | 0.220447 | -4.08737 |
| ENST00000448786.1 | 1.180314 | 2.728055 | 2.631508 | 0.042014 | 0.220529 | -4.08786 |
| NONHSAT160966.1   | 1.191584 | 3.477321 | 2.630517 | 0.042068 | 0.220687 | -4.08918 |
| lnc-DMRTA2-9:1    | -1.13002 | 2.925359 | -2.63042 | 0.042073 | 0.220687 | -4.08931 |
| lnc-PTGER4-1:2    | 1.769976 | 2.692121 | 2.630036 | 0.042094 | 0.220739 | -4.08982 |
| lnc-TBXT-4:1      | 1.177966 | 2.8302   | 2.629654 | 0.042114 | 0.220814 | -4.09033 |
| NONHSAT218595.1   | -1.14696 | 1.983026 | -2.62952 | 0.042121 | 0.220837 | -4.09051 |
| NONHSAT201317.1   | 1.024082 | 2.326088 | 2.628344 | 0.042185 | 0.221043 | -4.09208 |
| lnc-SEN2-1:2      | -1.06453 | 2.397119 | -2.62833 | 0.042186 | 0.221043 | -4.0921  |
| NONHSAT169902.1   | 1.106067 | 1.920706 | 2.6282   | 0.042193 | 0.221051 | -4.09227 |
| MSTRG.67637.2     | -1.0577  | 3.577419 | -2.62776 | 0.042217 | 0.221114 | -4.09286 |
| lnc-SLC44A3-2:1   | 1.27922  | 2.71535  | 2.627633 | 0.042223 | 0.221131 | -4.09303 |
| lnc-CLHC1-1:1     | -1.15018 | 2.595577 | -2.62707 | 0.042254 | 0.221202 | -4.09379 |
| lnc-BMP6-15:1     | -1.04022 | 2.200808 | -2.62572 | 0.042327 | 0.221383 | -4.09558 |
| NONHSAT190795.1   | -1.30923 | 2.143266 | -2.62535 | 0.042347 | 0.221403 | -4.09607 |
| lnc-ORAOV1-4:1    | -1.47706 | 3.721059 | -2.62532 | 0.042349 | 0.221403 | -4.09611 |
| ENST00000611182.1 | -1.01095 | 3.604192 | -2.62522 | 0.042354 | 0.221403 | -4.09625 |
| lnc-GUCY1A1-3:1   | -1.00742 | 1.966975 | -2.62516 | 0.042357 | 0.221403 | -4.09632 |
| NONHSAT195128.1   | 1.076188 | 2.389073 | 2.625158 | 0.042357 | 0.221403 | -4.09633 |

|                   |          |          |          |          |          |          |
|-------------------|----------|----------|----------|----------|----------|----------|
| NONHSAT162452.1   | 1.102244 | 3.390292 | 2.625094 | 0.042361 | 0.221403 | -4.09642 |
| NONHSAT178111.1   | 1.409356 | 3.377423 | 2.624552 | 0.04239  | 0.221455 | -4.09714 |
| NONHSAT218053.1   | 1.380957 | 6.547191 | 2.62441  | 0.042398 | 0.221455 | -4.09733 |
| lnc-MDM2-1:1      | -1.03482 | 4.070314 | -2.62412 | 0.042414 | 0.221507 | -4.09771 |
| lnc-GLRA1-1:3     | -1.30608 | 3.157855 | -2.62336 | 0.042455 | 0.221666 | -4.09873 |
| NONHSAT164011.1   | -1.06844 | 2.21334  | -2.62262 | 0.042496 | 0.221797 | -4.09972 |
| NONHSAT158248.1   | 1.836492 | 5.158307 | 2.621622 | 0.04255  | 0.22193  | -4.10105 |
| lnc-MAGEA1-2:1    | 1.442272 | 1.909269 | 2.62136  | 0.042564 | 0.221958 | -4.1014  |
| lnc-AGT-6:9       | -1.04782 | 2.495521 | -2.62132 | 0.042566 | 0.221958 | -4.10145 |
| lnc-GMDS-6:15     | -1.2094  | 3.319656 | -2.62093 | 0.042588 | 0.221966 | -4.10197 |
| lnc-VLDLR-2:1     | -1.69715 | 1.95115  | -2.62039 | 0.042617 | 0.222065 | -4.10269 |
| NONHSAT216115.1   | 1.543449 | 3.465922 | 2.619667 | 0.042657 | 0.222153 | -4.10366 |
| lnc-UBN2-1:1      | -1.2277  | 2.174543 | -2.6186  | 0.042715 | 0.222352 | -4.10508 |
| lnc-RHNO1-2:1     | -1.02141 | 4.957399 | -2.61781 | 0.042758 | 0.22251  | -4.10614 |
| NONHSAT214386.1   | 1.264453 | 4.98527  | 2.617412 | 0.04278  | 0.222576 | -4.10667 |
| NONHSAT205453.1   | 1.597521 | 5.44198  | 2.61635  | 0.042838 | 0.222755 | -4.10809 |
| lnc-KHNYN-12:1    | 1.48711  | 3.475506 | 2.616063 | 0.042854 | 0.222771 | -4.10847 |
| ENST00000429661.1 | 1.264553 | 2.155057 | 2.615968 | 0.042859 | 0.222783 | -4.10859 |
| MSTRG.45361.1     | 1.23272  | 7.309093 | 2.615906 | 0.042863 | 0.222786 | -4.10868 |
| NONHSAT154816.1   | 1.171842 | 2.805528 | 2.615825 | 0.042867 | 0.222786 | -4.10879 |
| ENST00000481312.1 | -1.19722 | 2.573874 | -2.61552 | 0.042884 | 0.222806 | -4.10919 |
| lnc-FADS6-1:2     | 1.06293  | 6.878023 | 2.614893 | 0.042918 | 0.222929 | -4.11003 |
| T271557           | 1.161706 | 2.688791 | 2.614661 | 0.042931 | 0.222962 | -4.11034 |
| NR_046114         | 1.286437 | 2.753151 | 2.613901 | 0.042973 | 0.223076 | -4.11135 |
| lnc-ANKRD10-7:1   | -1.0709  | 1.872276 | -2.61336 | 0.043003 | 0.223139 | -4.11208 |
| NONHSAT201160.1   | 1.429728 | 2.719403 | 2.613154 | 0.043014 | 0.22315  | -4.11235 |
| lnc-ANXA2-3:1     | 1.198227 | 4.363011 | 2.613093 | 0.043018 | 0.22315  | -4.11243 |
| MSTRG.35260.1     | -1.04703 | 2.08966  | -2.61309 | 0.043018 | 0.22315  | -4.11244 |
| ENST00000577420.1 | -1.13885 | 2.812938 | -2.61274 | 0.043037 | 0.223177 | -4.1129  |
| MSTRG.27436.1     | 1.175164 | 1.959505 | 2.612355 | 0.043058 | 0.223248 | -4.11342 |
| MSTRG.71676.1     | 1.169029 | 2.094511 | 2.612019 | 0.043077 | 0.223248 | -4.11387 |
| NONHSAT220855.1   | 1.521467 | 1.948507 | 2.611971 | 0.04308  | 0.223248 | -4.11393 |
| MSTRG.25522.1     | 1.236358 | 2.724597 | 2.611971 | 0.04308  | 0.223248 | -4.11393 |
| ENST00000589084.1 | 1.001594 | 4.705854 | 2.611948 | 0.043081 | 0.223248 | -4.11396 |
| T049721           | 1.508717 | 8.537879 | 2.611192 | 0.043123 | 0.223377 | -4.11497 |
| T171865           | -1.26409 | 2.469554 | -2.61112 | 0.043127 | 0.223377 | -4.11507 |
| MSTRG.8028.1      | 1.469626 | 3.037518 | 2.610584 | 0.043156 | 0.223427 | -4.11578 |
| ENST00000506612.1 | 1.363018 | 2.939966 | 2.61056  | 0.043158 | 0.223427 | -4.11582 |
| MSTRG.13818.1     | 1.168255 | 2.148113 | 2.610464 | 0.043163 | 0.22344  | -4.11594 |
| NONHSAT194402.1   | 1.208293 | 2.076361 | 2.609766 | 0.043202 | 0.22356  | -4.11687 |
| ENST00000661937.1 | 1.438797 | 2.416002 | 2.609418 | 0.043221 | 0.223625 | -4.11734 |
| lnc-NDC1-1:2      | 1.024116 | 2.725662 | 2.609078 | 0.04324  | 0.223654 | -4.11779 |
| ENST00000418218.5 | 1.474549 | 2.943955 | 2.608699 | 0.043261 | 0.223718 | -4.1183  |
| ENST00000515264.1 | -1.1592  | 4.168332 | -2.6087  | 0.043261 | 0.223718 | -4.11831 |
| NONHSAT165004.1   | 1.393378 | 2.324528 | 2.608273 | 0.043285 | 0.223777 | -4.11887 |
| MSTRG.10994.1     | -1.23124 | 2.530423 | -2.60816 | 0.043291 | 0.223793 | -4.11903 |
| NONHSAT154751.1   | -1.33652 | 3.554722 | -2.60771 | 0.043316 | 0.22384  | -4.11962 |
| ENST00000453180.5 | -1.05396 | 2.153936 | -2.60744 | 0.043331 | 0.223884 | -4.11998 |



|                   |          |          |          |          |          |          |
|-------------------|----------|----------|----------|----------|----------|----------|
| NONHSAT201577.1   | 1.073355 | 1.889293 | 2.607205 | 0.043344 | 0.223901 | -4.1203  |
| MSTRG.46673.1     | 1.076215 | 9.065996 | 2.60671  | 0.043371 | 0.223979 | -4.12096 |
| MSTRG.49234.1     | -1.17787 | 2.597035 | -2.6062  | 0.0434   | 0.224101 | -4.12163 |
| ENST00000630360.1 | 1.535587 | 3.316777 | 2.605936 | 0.043415 | 0.224141 | -4.12199 |
| lnc-LAPTM4B-4:1   | 2.079123 | 4.605081 | 2.605346 | 0.043447 | 0.224245 | -4.12278 |
| lnc-RGS18-9:1     | 1.087812 | 3.33521  | 2.604277 | 0.043507 | 0.224387 | -4.12421 |
| NONHSAT205598.1   | 1.329413 | 2.618804 | 2.604253 | 0.043508 | 0.224387 | -4.12424 |
| lnc-ZC3H12D-19:1  | -1.01007 | 2.430503 | -2.60393 | 0.043526 | 0.224431 | -4.12467 |
| lnc-GLUD2-12:1    | -1.14703 | 2.770285 | -2.60382 | 0.043533 | 0.224431 | -4.12482 |
| lnc-GLA-1:1       | 1.260678 | 3.816365 | 2.603361 | 0.043558 | 0.224478 | -4.12543 |
| KCNMA1-AS2:1      | -1.11342 | 2.855783 | -2.60318 | 0.043569 | 0.224503 | -4.12568 |
| lnc-DDX18-4:1     | 1.269262 | 3.333827 | 2.602926 | 0.043583 | 0.224544 | -4.12601 |
| lnc-USP9Y-11:1    | 1.209652 | 2.727569 | 2.602753 | 0.043592 | 0.224567 | -4.12624 |
| lnc-SLC2A3-4:1    | 1.654199 | 1.882039 | 2.602265 | 0.04362  | 0.22465  | -4.12689 |
| ENST00000663658.1 | 1.636242 | 2.576801 | 2.601919 | 0.043639 | 0.224716 | -4.12736 |
| ENST00000542197.1 | 1.410472 | 2.769461 | 2.601867 | 0.043642 | 0.22472  | -4.12743 |
| lnc-NIPAL1-2:1    | 1.716415 | 7.738251 | 2.601654 | 0.043654 | 0.224726 | -4.12771 |
| lnc-PAK2-2:1      | -1.24195 | 3.199389 | -2.60146 | 0.043665 | 0.224733 | -4.12797 |
| lnc-BLVRB-2:1     | -1.56819 | 3.214602 | -2.60065 | 0.04371  | 0.224886 | -4.12905 |
| ENST00000579673.1 | 1.339303 | 2.793683 | 2.600576 | 0.043714 | 0.224886 | -4.12915 |
| lnc-CDC5L-6:1     | 1.131897 | 4.703501 | 2.600533 | 0.043717 | 0.224886 | -4.12921 |
| MSTRG.9368.1      | 1.399616 | 4.449932 | 2.600091 | 0.043742 | 0.224957 | -4.1298  |
| NONHSAT204454.1   | 1.425491 | 3.884899 | 2.600051 | 0.043744 | 0.224957 | -4.12985 |
| ENST00000666509.1 | -1.13536 | 3.106096 | -2.59971 | 0.043763 | 0.22502  | -4.13031 |
| NONHSAT180688.1   | 1.271641 | 2.830469 | 2.599672 | 0.043765 | 0.22502  | -4.13036 |
| MSTRG.51158.1     | 1.570021 | 2.534042 | 2.599271 | 0.043788 | 0.225099 | -4.13089 |
| lnc-CNN1-1:1      | 1.156016 | 2.101119 | 2.599101 | 0.043797 | 0.225099 | -4.13112 |
| NONHSAT182156.1   | 1.130953 | 2.626683 | 2.599087 | 0.043798 | 0.225099 | -4.13114 |
| NONHSAT166449.1   | 1.313903 | 3.929046 | 2.599022 | 0.043802 | 0.225099 | -4.13123 |
| MSTRG.32782.1     | -1.76181 | 3.372621 | -2.59889 | 0.043809 | 0.225099 | -4.1314  |
| NONHSAT172134.1   | 1.442202 | 2.137892 | 2.598606 | 0.043825 | 0.225111 | -4.13178 |
| ENST00000504552.5 | 1.068805 | 3.803534 | 2.597576 | 0.043883 | 0.225298 | -4.13316 |
| NONHSAT161313.1   | 1.405097 | 3.640044 | 2.597539 | 0.043885 | 0.225298 | -4.13321 |
| NONHSAT213161.1   | 1.545709 | 3.026121 | 2.596758 | 0.043929 | 0.225444 | -4.13425 |
| MSTRG.18248.1     | 1.600867 | 3.68224  | 2.596663 | 0.043935 | 0.225455 | -4.13438 |
| lnc-LY6G5C-1:2    | 1.096302 | 8.539956 | 2.595293 | 0.044012 | 0.225653 | -4.13621 |
| lnc-KLHDC4-74:4   | -1.3511  | 6.572006 | -2.59508 | 0.044024 | 0.225673 | -4.13649 |
| lnc-PLCG1-2:1     | -1.1834  | 7.803195 | -2.59235 | 0.044179 | 0.225994 | -4.14014 |
| NONHSAT164883.1   | -1.20592 | 3.220265 | -2.59176 | 0.044212 | 0.226086 | -4.14093 |
| NONHSAT197672.1   | 1.403704 | 2.851142 | 2.590722 | 0.044271 | 0.226284 | -4.14232 |
| NONHSAT214369.1   | 1.181822 | 1.963134 | 2.590394 | 0.04429  | 0.226333 | -4.14276 |
| MSTRG.65639.1     | 1.23343  | 3.410941 | 2.59017  | 0.044303 | 0.226365 | -4.14306 |
| NONHSAT169761.1   | 1.029688 | 3.843628 | 2.589983 | 0.044313 | 0.226395 | -4.14331 |
| NONHSAT175877.1   | -1.15679 | 2.396974 | -2.58987 | 0.04432  | 0.226395 | -4.14346 |
| lnc-TM6SF1-4:1    | 1.065544 | 4.091122 | 2.589225 | 0.044357 | 0.226513 | -4.14432 |
| NONHSAT172930.1   | -1.06484 | 4.068376 | -2.58919 | 0.044359 | 0.226513 | -4.14437 |
| MSTRG.32507.1     | 1.139926 | 2.463593 | 2.588407 | 0.044403 | 0.226638 | -4.14541 |
| lnc-GJD4-1:1      | 1.492581 | 5.078633 | 2.588125 | 0.044419 | 0.226697 | -4.14579 |

|                   |          |          |          |          |          |          |
|-------------------|----------|----------|----------|----------|----------|----------|
| NONHSAT222034.1   | 1.062302 | 4.135719 | 2.587687 | 0.044444 | 0.226767 | -4.14638 |
| ENST00000556205.1 | 1.085676 | 2.632746 | 2.587219 | 0.044471 | 0.226835 | -4.147   |
| ENST00000662661.1 | 1.163941 | 3.524676 | 2.586643 | 0.044504 | 0.226925 | -4.14777 |
| MSTRG.10786.1     | -1.13067 | 2.51294  | -2.58664 | 0.044505 | 0.226925 | -4.14778 |
| lnc-BUB1-2:1      | 1.555538 | 2.539187 | 2.586158 | 0.044532 | 0.227008 | -4.14842 |
| NONHSAT194802.1   | 1.069266 | 1.60694  | 2.585345 | 0.044578 | 0.227136 | -4.14951 |
| NONHSAT212984.1   | 1.462753 | 2.949862 | 2.585153 | 0.044589 | 0.227174 | -4.14976 |
| MSTRG.30012.1     | -1.01298 | 3.91761  | -2.58409 | 0.04465  | 0.227351 | -4.15119 |
| ENST00000651142.1 | 1.884554 | 4.142341 | 2.584076 | 0.044651 | 0.227351 | -4.1512  |
| NONHSAT195105.1   | 1.035875 | 2.926169 | 2.583933 | 0.044659 | 0.227381 | -4.15139 |
| NONHSAT181360.1   | 1.04046  | 2.038191 | 2.583822 | 0.044666 | 0.227385 | -4.15154 |
| lnc-KIAA1551-8:2  | 1.357263 | 2.382038 | 2.583802 | 0.044667 | 0.227385 | -4.15157 |
| T292163           | 1.248398 | 3.080644 | 2.583362 | 0.044692 | 0.227475 | -4.15216 |
| NONHSAT160178.1   | 1.381849 | 2.700467 | 2.58263  | 0.044734 | 0.227602 | -4.15314 |
| NONHSAT201286.1   | 1.038394 | 3.66217  | 2.581855 | 0.044779 | 0.227714 | -4.15417 |
| NONHSAT200230.1   | 1.050672 | 6.695392 | 2.581736 | 0.044786 | 0.227737 | -4.15433 |
| NONHSAT167553.1   | 1.488022 | 3.575277 | 2.581426 | 0.044804 | 0.227783 | -4.15475 |
| T298925           | -1.17847 | 5.098976 | -2.58117 | 0.044818 | 0.22781  | -4.15509 |
| NONHSAT209990.1   | 1.088488 | 3.638881 | 2.581109 | 0.044822 | 0.227818 | -4.15517 |
| NONHSAT154604.1   | 1.219147 | 2.221576 | 2.580952 | 0.044831 | 0.227849 | -4.15538 |
| NONHSAT184200.1   | 1.332261 | 2.853217 | 2.580847 | 0.044837 | 0.227849 | -4.15552 |
| lnc-MYOCOS-4:1    | -1.21697 | 3.538203 | -2.58077 | 0.044842 | 0.227849 | -4.15563 |
| MSTRG.8224.1      | -1.21302 | 4.041175 | -2.58    | 0.044886 | 0.227994 | -4.15666 |
| lnc-CPEB2-17:1    | 1.237749 | 5.38103  | 2.578579 | 0.044968 | 0.228146 | -4.15856 |
| NONHSAT153532.1   | -1.08164 | 2.033778 | -2.57838 | 0.04498  | 0.228153 | -4.15882 |
| MSTRG.837.1       | -1.03954 | 3.951072 | -2.57832 | 0.044983 | 0.228153 | -4.1589  |
| lnc-RAB11A-4:1    | 1.077996 | 2.01795  | 2.578293 | 0.044985 | 0.228153 | -4.15894 |
| ENST00000503844.1 | 1.813632 | 3.039424 | 2.577962 | 0.045004 | 0.228224 | -4.15938 |
| ENST00000561254.1 | -1.35761 | 2.548298 | -2.57782 | 0.045012 | 0.22824  | -4.15958 |
| NONHSAT197128.1   | -1.03356 | 3.167484 | -2.57779 | 0.045014 | 0.22824  | -4.15961 |
| lnc-DEK-2:1       | -1.05641 | 5.365397 | -2.57741 | 0.045036 | 0.228336 | -4.16011 |
| NONHSAT223852.1   | 1.076906 | 8.469042 | 2.577058 | 0.045056 | 0.228375 | -4.16059 |
| NONHSAT174795.1   | 1.299241 | 2.060722 | 2.576455 | 0.045091 | 0.22844  | -4.1614  |
| MSTRG.32671.24    | -1.08196 | 2.426525 | -2.57645 | 0.045092 | 0.22844  | -4.16141 |
| NONHSAT177166.1   | 1.158127 | 2.918117 | 2.5756   | 0.045141 | 0.228523 | -4.16254 |
| lnc-VRK2-15:1     | -1.31157 | 4.303346 | -2.57489 | 0.045182 | 0.228582 | -4.16349 |
| ENST00000607844.1 | -1.00797 | 5.890937 | -2.57447 | 0.045207 | 0.228673 | -4.16405 |
| NONHSAT210164.1   | 1.346203 | 1.701833 | 2.573874 | 0.045241 | 0.228749 | -4.16485 |
| lnc-ERCC6L2-7:1   | 1.115675 | 4.908777 | 2.573761 | 0.045248 | 0.228749 | -4.165   |
| ENST00000669185.1 | 1.232625 | 1.771376 | 2.573304 | 0.045275 | 0.228833 | -4.16561 |
| ENST00000657981.1 | 1.889587 | 3.809989 | 2.572826 | 0.045302 | 0.228891 | -4.16625 |
| ENST00000655381.1 | 1.199972 | 2.071361 | 2.572549 | 0.045319 | 0.228912 | -4.16662 |
| lnc-LIFR-7:1      | 1.396019 | 2.913042 | 2.572505 | 0.045321 | 0.228912 | -4.16668 |
| NONHSAT209485.1   | 1.431973 | 2.990951 | 2.572388 | 0.045328 | 0.228924 | -4.16684 |
| lnc-PTPRZ1-12:1   | 1.591369 | 3.256232 | 2.572197 | 0.045339 | 0.228953 | -4.16709 |
| NONHSAT204264.1   | -1.0928  | 2.94081  | -2.57178 | 0.045364 | 0.229    | -4.16765 |
| lnc-TEX47-4:1     | -1.364   | 2.571272 | -2.57117 | 0.045399 | 0.229103 | -4.16847 |
| NONHSAT211608.1   | 1.029862 | 2.662441 | 2.570542 | 0.045436 | 0.229218 | -4.16931 |

|                   |          |          |          |          |          |          |
|-------------------|----------|----------|----------|----------|----------|----------|
| NONHSAT213189.1   | -1.75404 | 4.290555 | -2.56986 | 0.045476 | 0.229371 | -4.17022 |
| lnc-INPP5F-1:1    | -1.15003 | 3.472658 | -2.56871 | 0.045543 | 0.229574 | -4.17176 |
| lnc-RASEF-5:1     | -1.7703  | 3.548323 | -2.56835 | 0.045564 | 0.229645 | -4.17223 |
| lnc-SLC30A5-3:1   | 1.563468 | 9.373162 | 2.568249 | 0.04557  | 0.229664 | -4.17237 |
| ENST00000665225.1 | 1.941156 | 2.733743 | 2.567865 | 0.045593 | 0.229675 | -4.17289 |
| NONHSAT197729.1   | 1.31187  | 2.454403 | 2.567748 | 0.0456   | 0.229697 | -4.17305 |
| MSTRG.39541.1     | 1.31662  | 3.260061 | 2.567519 | 0.045613 | 0.229697 | -4.17335 |
| NONHSAT153338.1   | 1.227581 | 1.682359 | 2.566509 | 0.045673 | 0.229828 | -4.1747  |
| NONHSAT197283.1   | -1.46749 | 2.48927  | -2.566   | 0.045702 | 0.229894 | -4.17538 |
| MSTRG.44994.1     | 1.384067 | 8.355577 | 2.565412 | 0.045737 | 0.229992 | -4.17617 |
| T191042           | 1.339795 | 1.74472  | 2.565325 | 0.045742 | 0.229992 | -4.17629 |
| lnc-ADCY7-1:2     | 1.19255  | 2.22072  | 2.565023 | 0.04576  | 0.230058 | -4.17669 |
| NONHSAT214246.1   | 1.128412 | 2.311832 | 2.564961 | 0.045764 | 0.230064 | -4.17677 |
| ENST00000656677.1 | 1.019721 | 1.829234 | 2.564704 | 0.045779 | 0.230116 | -4.17712 |
| NONHSAT184146.1   | 1.601689 | 2.641111 | 2.564637 | 0.045783 | 0.230116 | -4.17721 |
| NONHSAT209205.1   | 1.831091 | 2.937716 | 2.564045 | 0.045818 | 0.230237 | -4.178   |
| MSTRG.52417.1     | -1.06811 | 4.258146 | -2.56401 | 0.04582  | 0.230237 | -4.17805 |
| ENST00000446081.5 | 1.389797 | 2.538503 | 2.563893 | 0.045827 | 0.230255 | -4.1782  |
| ENST00000657859.1 | -1.565   | 3.664463 | -2.56381 | 0.045831 | 0.230256 | -4.17831 |
| NONHSAT180289.1   | 1.327172 | 2.505342 | 2.563673 | 0.04584  | 0.230275 | -4.1785  |
| NONHSAT220997.1   | -1.04488 | 2.450366 | -2.56326 | 0.045864 | 0.230327 | -4.17905 |
| ENST00000648775.1 | 1.112818 | 7.793854 | 2.562981 | 0.045881 | 0.230354 | -4.17943 |
| T249506           | 1.703785 | 3.064593 | 2.562978 | 0.045881 | 0.230354 | -4.17943 |
| lnc-FIGNL1-4:1    | 1.368593 | 1.800408 | 2.562726 | 0.045896 | 0.230406 | -4.17977 |
| NONHSAT202513.1   | -1.18973 | 2.025096 | -2.56239 | 0.045916 | 0.230444 | -4.18022 |
| ENST00000431130.2 | -1.20807 | 2.2632   | -2.56233 | 0.045919 | 0.230444 | -4.1803  |
| MSTRG.49187.2     | 1.493292 | 3.259012 | 2.562186 | 0.045928 | 0.230464 | -4.18049 |
| NONHSAT214036.1   | -1.12784 | 1.902726 | -2.56165 | 0.04596  | 0.230567 | -4.18121 |
| NONHSAT160516.1   | -1.20476 | 3.175637 | -2.56128 | 0.045982 | 0.230619 | -4.18171 |
| NONHSAT187007.1   | 1.365425 | 2.895322 | 2.561205 | 0.045986 | 0.23062  | -4.1818  |
| NONHSAT190969.1   | -1.03789 | 2.381748 | -2.56079 | 0.046011 | 0.230675 | -4.18236 |
| NONHSAT159460.1   | -1.02682 | 2.666223 | -2.56039 | 0.046034 | 0.230735 | -4.1829  |
| lnc-HES1-8:1      | -1.11506 | 2.817019 | -2.56005 | 0.046054 | 0.230775 | -4.18335 |
| NONHSAT198795.1   | -1.19429 | 2.040883 | -2.56002 | 0.046056 | 0.230775 | -4.18338 |
| MSTRG.69589.1     | 1.144659 | 2.548991 | 2.56002  | 0.046056 | 0.230775 | -4.18339 |
| ENST00000602704.1 | -1.32183 | 2.560967 | -2.5599  | 0.046063 | 0.230776 | -4.18355 |
| T187581           | 1.397881 | 2.905797 | 2.559389 | 0.046094 | 0.230839 | -4.18423 |
| lnc-CCDC171-4:1   | 1.263564 | 4.337127 | 2.558674 | 0.046136 | 0.230958 | -4.18519 |
| ENST00000666528.1 | 1.443046 | 2.670978 | 2.558146 | 0.046168 | 0.231046 | -4.1859  |
| MSTRG.47445.1     | -1.7569  | 2.952185 | -2.55776 | 0.046191 | 0.231122 | -4.18641 |
| lnc-CHRNA4-4:2    | 1.091713 | 1.833232 | 2.557613 | 0.046199 | 0.231148 | -4.18661 |
| ENST00000423208.2 | 1.523893 | 2.99629  | 2.557264 | 0.04622  | 0.231194 | -4.18708 |
| MSTRG.51404.5     | 1.162784 | 2.078358 | 2.557167 | 0.046226 | 0.231194 | -4.18721 |
| NONHSAT177333.1   | 1.496272 | 2.987625 | 2.556357 | 0.046274 | 0.23135  | -4.18829 |
| NONHSAT208713.1   | 1.065322 | 1.709059 | 2.555889 | 0.046302 | 0.231395 | -4.18892 |
| T304975           | -1.63426 | 3.823432 | -2.55497 | 0.046357 | 0.231603 | -4.19015 |
| lnc-FCN1-4:1      | -1.00954 | 4.620866 | -2.55469 | 0.046374 | 0.231653 | -4.19052 |
| ENST00000597450.1 | 1.157832 | 6.270838 | 2.554407 | 0.046391 | 0.231663 | -4.1909  |

|                   |          |          |          |          |          |          |
|-------------------|----------|----------|----------|----------|----------|----------|
| NONHSAT198045.1   | 1.075138 | 2.417827 | 2.554269 | 0.046399 | 0.231664 | -4.19109 |
| lnc-LY86-11:1     | 1.033276 | 5.352157 | 2.554021 | 0.046414 | 0.231681 | -4.19142 |
| lnc-MB21D2-1:2    | 1.922065 | 3.794377 | 2.553669 | 0.046435 | 0.231739 | -4.19189 |
| LINC02542:7       | -1.38879 | 2.944235 | -2.55328 | 0.046458 | 0.231799 | -4.19241 |
| ENST00000559394.2 | -1.01125 | 1.997213 | -2.55268 | 0.046494 | 0.23193  | -4.19322 |
| MSTRG.29582.7     | 1.151319 | 1.638649 | 2.552651 | 0.046496 | 0.23193  | -4.19325 |
| NONHSAT158712.1   | 1.282009 | 1.726205 | 2.551747 | 0.04655  | 0.232128 | -4.19447 |
| NONHSAT218176.1   | 1.339777 | 2.940105 | 2.551552 | 0.046562 | 0.232128 | -4.19473 |
| NONHSAT166571.1   | 1.034921 | 3.251581 | 2.551151 | 0.046586 | 0.232196 | -4.19526 |
| lnc-PGRMC1-2:1    | 1.061552 | 3.456849 | 2.550654 | 0.046616 | 0.232264 | -4.19593 |
| NONHSAT173356.1   | -1.19916 | 3.124009 | -2.54948 | 0.046687 | 0.232393 | -4.19751 |
| MSTRG.230.1       | 1.23912  | 2.410153 | 2.549359 | 0.046694 | 0.232393 | -4.19766 |
| T247847           | 1.337854 | 2.911678 | 2.54893  | 0.04672  | 0.232423 | -4.19824 |
| ENST00000650029.1 | 1.244845 | 2.376693 | 2.548361 | 0.046754 | 0.232516 | -4.199   |
| lnc-HEY1-2:1      | -1.06662 | 3.467911 | -2.54815 | 0.046767 | 0.232545 | -4.19928 |
| lnc-ZG16-4:1      | 1.189257 | 10.23806 | 2.548014 | 0.046775 | 0.232573 | -4.19947 |
| NONHSAT149376.1   | 1.033599 | 3.439885 | 2.547981 | 0.046777 | 0.232573 | -4.19951 |
| NONHSAT190081.1   | 1.016638 | 3.491014 | 2.547799 | 0.046788 | 0.232593 | -4.19975 |
| lnc-ZNF217-2:3    | 1.651463 | 3.01456  | 2.546377 | 0.046874 | 0.232871 | -4.20166 |
| LLPH-DT:9         | -1.04754 | 1.965681 | -2.54572 | 0.046914 | 0.232932 | -4.20254 |
| NONHSAT190384.1   | 1.402058 | 2.129883 | 2.545499 | 0.046927 | 0.232943 | -4.20283 |
| ENST00000625268.2 | 1.186048 | 3.227781 | 2.545314 | 0.046938 | 0.232973 | -4.20308 |
| NONHSAT222449.1   | 1.478197 | 2.593919 | 2.54495  | 0.04696  | 0.233048 | -4.20357 |
| lnc-WASF3-1:1     | 1.371965 | 2.960946 | 2.54433  | 0.046998 | 0.233211 | -4.2044  |
| lnc-QKI-8:1       | 1.002364 | 1.954949 | 2.544288 | 0.047001 | 0.233211 | -4.20446 |
| ENST00000430468.1 | 1.325634 | 2.228575 | 2.543852 | 0.047027 | 0.233281 | -4.20504 |
| lnc-COLGALT2-2:1  | 1.447493 | 2.986913 | 2.543627 | 0.047041 | 0.233308 | -4.20534 |
| NONHSAT154277.1   | 1.402184 | 2.924856 | 2.54309  | 0.047073 | 0.233401 | -4.20606 |
| lnc-NDUFA10-8:2   | 1.047141 | 4.756812 | 2.542968 | 0.047081 | 0.233415 | -4.20622 |
| lnc-PTPRZ1-8:1    | -1.14481 | 2.03207  | -2.54269 | 0.047098 | 0.233442 | -4.2066  |
| lnc-LSM7-3:1      | 1.173588 | 3.830517 | 2.542518 | 0.047108 | 0.233482 | -4.20683 |
| lnc-AK3-5:2       | 1.496473 | 3.05278  | 2.541735 | 0.047156 | 0.233615 | -4.20788 |
| ENST00000648967.1 | -1.00308 | 3.04261  | -2.54147 | 0.047172 | 0.233655 | -4.20823 |
| NONHSAT155872.1   | 1.41224  | 2.524478 | 2.541449 | 0.047173 | 0.233655 | -4.20826 |
| lnc-ACVR1-4:1     | 1.480966 | 2.526654 | 2.541016 | 0.0472   | 0.233763 | -4.20884 |
| lnc-DAD1-4:1      | 1.17346  | 2.680314 | 2.540715 | 0.047218 | 0.233807 | -4.20924 |
| NONHSAT182326.1   | -1.34008 | 3.181968 | -2.54007 | 0.047257 | 0.233946 | -4.21011 |
| lnc-SAP30-2:1     | 1.560574 | 2.569185 | 2.538669 | 0.047343 | 0.234182 | -4.21198 |
| ENST00000669903.1 | 1.164148 | 2.79322  | 2.538413 | 0.047359 | 0.23422  | -4.21233 |
| lnc-SEM1-4:1      | -1.07003 | 3.458557 | -2.53828 | 0.047366 | 0.234233 | -4.2125  |
| lnc-HERPUD2-8:1   | 1.250336 | 4.362447 | 2.538213 | 0.047371 | 0.234242 | -4.2126  |
| MSTRG.41630.1     | -1.0065  | 2.498504 | -2.53758 | 0.04741  | 0.234366 | -4.21345 |
| NONHSAT171942.1   | -1.03868 | 2.386362 | -2.53664 | 0.047467 | 0.234536 | -4.21471 |
| T356680           | -1.28579 | 2.704864 | -2.53623 | 0.047492 | 0.234608 | -4.21525 |
| lnc-PSMA8-5:3     | -1.29371 | 4.431028 | -2.53595 | 0.047509 | 0.234658 | -4.21563 |
| NONHSAT165560.1   | -1.08141 | 2.532245 | -2.53569 | 0.047525 | 0.234696 | -4.21597 |
| ENST00000419499.1 | 1.305035 | 3.868532 | 2.535354 | 0.047546 | 0.234725 | -4.21643 |
| NONHSAT162148.1   | 1.109851 | 6.09696  | 2.535118 | 0.047561 | 0.234748 | -4.21674 |

|                   |          |          |          |          |          |          |
|-------------------|----------|----------|----------|----------|----------|----------|
| MSTRG.4118.1      | -1.22052 | 2.309117 | -2.53504 | 0.047565 | 0.234748 | -4.21685 |
| NONHSAT163671.1   | 1.358225 | 2.96243  | 2.534988 | 0.047569 | 0.234748 | -4.21692 |
| NONHSAT214047.1   | -1.23265 | 2.515348 | -2.53491 | 0.047574 | 0.234748 | -4.21703 |
| lnc-RGPD4-5:1     | -1.15038 | 1.679757 | -2.53419 | 0.047618 | 0.234865 | -4.21799 |
| lnc-SLC4A1-2:1    | -1.13846 | 2.5663   | -2.5339  | 0.047636 | 0.23493  | -4.21838 |
| lnc-ERGIC1-2:2    | -1.11169 | 3.787961 | -2.5337  | 0.047648 | 0.234932 | -4.21864 |
| lnc-CNTNAP3B-14:1 | 1.488723 | 3.120315 | 2.532521 | 0.04772  | 0.235211 | -4.22022 |
| MSTRG.6162.1      | -1.09545 | 2.933233 | -2.53218 | 0.047741 | 0.23529  | -4.22068 |
| lnc-UBE2R2-1:1    | 1.007351 | 3.227587 | 2.531942 | 0.047756 | 0.235329 | -4.221   |
| ENST00000432706.1 | 1.162712 | 3.591413 | 2.531319 | 0.047795 | 0.235429 | -4.22184 |
| ENST00000657062.1 | -1.03365 | 2.152646 | -2.53128 | 0.047797 | 0.235429 | -4.22189 |
| NONHSAT186713.1   | -1.03291 | 2.102629 | -2.53101 | 0.047813 | 0.235472 | -4.22224 |
| NONHSAT158528.1   | -1.32269 | 2.685239 | -2.53017 | 0.047866 | 0.235515 | -4.22338 |
| ENST00000421604.1 | -1.1745  | 3.75949  | -2.52993 | 0.04788  | 0.235561 | -4.22369 |
| MSTRG.27510.1     | 1.403973 | 2.942022 | 2.52963  | 0.047899 | 0.235601 | -4.2241  |
| NONHSAT187942.1   | 1.272195 | 2.039199 | 2.529387 | 0.047914 | 0.235601 | -4.22442 |
| MSTRG.16317.1     | 1.088153 | 3.67804  | 2.528637 | 0.047961 | 0.23575  | -4.22543 |
| NONHSAT217770.1   | 1.137376 | 1.649925 | 2.528613 | 0.047962 | 0.23575  | -4.22546 |
| ENST00000661295.1 | 1.059665 | 1.900356 | 2.528149 | 0.047991 | 0.235841 | -4.22608 |
| MSTRG.45254.1     | -1.41742 | 2.133464 | -2.52762 | 0.048024 | 0.23591  | -4.22679 |
| ENST00000578539.1 | -1.01597 | 3.981687 | -2.52708 | 0.048058 | 0.236035 | -4.22752 |
| lnc-TRMT13-2:1    | -1.47363 | 2.953819 | -2.52702 | 0.048061 | 0.236036 | -4.2276  |
| ENST00000661365.1 | 1.239564 | 2.193454 | 2.526753 | 0.048078 | 0.23608  | -4.22796 |
| NONHSAT219922.1   | 1.248297 | 2.256672 | 2.52647  | 0.048095 | 0.236131 | -4.22834 |
| NR_120463         | 1.016929 | 1.767781 | 2.526365 | 0.048102 | 0.236131 | -4.22848 |
| MSTRG.48929.1     | 1.400525 | 2.416272 | 2.526333 | 0.048104 | 0.236131 | -4.22852 |
| NONHSAT177887.1   | 1.11233  | 2.514925 | 2.526013 | 0.048124 | 0.236194 | -4.22895 |
| lnc-PPIL4-9:1     | 1.175493 | 3.551656 | 2.52549  | 0.048156 | 0.236273 | -4.22965 |
| ENST00000621825.1 | -1.1234  | 1.837691 | -2.52543 | 0.04816  | 0.23628  | -4.22973 |
| ENST00000418471.1 | 1.093702 | 1.979775 | 2.525341 | 0.048166 | 0.236296 | -4.22985 |
| NONHSAT153555.1   | -1.15436 | 3.729442 | -2.52505 | 0.048184 | 0.236351 | -4.23024 |
| lnc-AMIGO1-2:1    | -1.53744 | 3.323432 | -2.52495 | 0.04819  | 0.236351 | -4.23037 |
| NONHSAT162403.1   | 1.449409 | 2.408393 | 2.524681 | 0.048207 | 0.236371 | -4.23073 |
| lnc-KATNA1-2:2    | -1.17018 | 4.075064 | -2.52333 | 0.048291 | 0.236478 | -4.23254 |
| NONHSAT173036.1   | 1.149125 | 2.156773 | 2.522463 | 0.048345 | 0.236625 | -4.23371 |
| PTOV1-AS1:8       | -1.1057  | 3.523348 | -2.52246 | 0.048345 | 0.236625 | -4.23371 |
| MSTRG.23195.1     | 1.406967 | 2.875679 | 2.522168 | 0.048364 | 0.236666 | -4.2341  |
| lnc-ZCCHC2-2:1    | 1.028233 | 2.404494 | 2.521749 | 0.04839  | 0.236687 | -4.23467 |
| lnc-FAM84B-3:1    | -1.15911 | 3.158008 | -2.52118 | 0.048426 | 0.236811 | -4.23543 |
| MSTRG.25638.1     | -1.03811 | 3.452843 | -2.52057 | 0.048464 | 0.236905 | -4.23624 |
| MSTRG.70718.1     | 1.134224 | 2.151399 | 2.518794 | 0.048575 | 0.237249 | -4.23863 |
| NONHSAT159195.1   | 1.860168 | 2.303499 | 2.518617 | 0.048586 | 0.237277 | -4.23887 |
| MSTRG.29630.1     | 1.276424 | 3.425961 | 2.518304 | 0.048606 | 0.237325 | -4.23929 |
| MSTRG.33677.10    | 1.181204 | 8.557936 | 2.517948 | 0.048629 | 0.237375 | -4.23976 |
| NONHSAT161216.1   | 1.195797 | 1.97977  | 2.517455 | 0.04866  | 0.237452 | -4.24042 |
| NONHSAT194338.1   | 1.097265 | 2.453757 | 2.515974 | 0.048753 | 0.237709 | -4.24241 |
| MSTRG.61301.1     | 1.081061 | 3.367357 | 2.515773 | 0.048766 | 0.237748 | -4.24268 |
| NONHSAT218474.1   | 1.551395 | 8.571469 | 2.515514 | 0.048782 | 0.237774 | -4.24303 |

|                   |          |          |          |          |          |          |
|-------------------|----------|----------|----------|----------|----------|----------|
| T035679           | 1.168504 | 2.165593 | 2.515499 | 0.048783 | 0.237774 | -4.24305 |
| lnc-SLC25A29-2:1  | -1.11809 | 1.672353 | -2.51446 | 0.048848 | 0.237943 | -4.24443 |
| NONHSAT181428.1   | 1.710682 | 3.60735  | 2.513295 | 0.048922 | 0.238166 | -4.246   |
| ENST00000655326.1 | 1.279227 | 1.907987 | 2.512987 | 0.048942 | 0.238215 | -4.24642 |
| NONHSAT167074.1   | -1.41094 | 1.81357  | -2.5128  | 0.048954 | 0.238262 | -4.24667 |
| ENST00000656125.1 | 1.185779 | 2.600566 | 2.512403 | 0.048979 | 0.238361 | -4.2472  |
| ENST00000666926.1 | -1.28987 | 3.096932 | -2.51158 | 0.049031 | 0.238557 | -4.2483  |
| MSTRG.25769.1     | 1.098315 | 2.100864 | 2.510797 | 0.049081 | 0.23873  | -4.24936 |
| MSTRG.13494.1     | -1.37945 | 2.612345 | -2.51066 | 0.04909  | 0.238759 | -4.24954 |
| lnc-GHSR-3:1      | -1.46581 | 4.11015  | -2.51054 | 0.049097 | 0.238762 | -4.24969 |
| T034239           | 1.239753 | 2.120361 | 2.510073 | 0.049127 | 0.238839 | -4.25033 |
| NONHSAT154548.1   | -1.1197  | 2.512979 | -2.50915 | 0.049186 | 0.238989 | -4.25156 |
| MSTRG.26757.1     | 1.251518 | 4.615138 | 2.508862 | 0.049204 | 0.239029 | -4.25195 |
| NONHSAT191639.1   | 1.429884 | 2.332123 | 2.508754 | 0.049211 | 0.239051 | -4.2521  |
| NONHSAT162315.1   | 1.712188 | 3.090174 | 2.508647 | 0.049218 | 0.239061 | -4.25224 |
| lnc-F8-2:1        | -1.26097 | 2.796886 | -2.50793 | 0.049264 | 0.239146 | -4.25321 |
| NONHSAT197981.1   | 1.303831 | 2.274407 | 2.507409 | 0.049297 | 0.239233 | -4.2539  |
| lnc-GPR132-1:1    | 1.740376 | 2.642195 | 2.506974 | 0.049325 | 0.239328 | -4.25448 |
| ENST00000506895.1 | -1.29626 | 3.218813 | -2.50686 | 0.049332 | 0.239329 | -4.25464 |
| ENST00000530572.1 | -1.34728 | 2.184656 | -2.50677 | 0.049337 | 0.239331 | -4.25475 |
| MSTRG.42849.1     | -1.00477 | 4.18815  | -2.50643 | 0.049359 | 0.23938  | -4.25521 |
| ADGRD1-AS1:3      | 1.426466 | 2.412333 | 2.506304 | 0.049367 | 0.239396 | -4.25538 |
| ENST00000668381.1 | 1.162894 | 4.709338 | 2.505998 | 0.049387 | 0.239445 | -4.25579 |
| lnc-IL2RA-7:1     | -1.28975 | 2.656816 | -2.50528 | 0.049433 | 0.239602 | -4.25676 |
| NONHSAT169894.1   | 1.229402 | 1.943178 | 2.505233 | 0.049436 | 0.239602 | -4.25682 |
| NONHSAT174308.1   | 1.10003  | 2.142538 | 2.505077 | 0.049446 | 0.239627 | -4.25703 |
| NONHSAT207179.1   | -1.15698 | 2.044942 | -2.50503 | 0.049449 | 0.239631 | -4.2571  |
| ENST00000419226.5 | 1.061821 | 2.612705 | 2.504828 | 0.049462 | 0.239636 | -4.25736 |
| MSTRG.7128.1      | -1.13117 | 3.826216 | -2.50447 | 0.049485 | 0.239677 | -4.25784 |
| lnc-GLTP-1:1      | 1.09016  | 2.599357 | 2.503078 | 0.049574 | 0.239902 | -4.25971 |
| lnc-PDZD8-6:1     | -1.18126 | 4.000295 | -2.50307 | 0.049575 | 0.239902 | -4.25973 |
| lnc-TYW1-6:1      | 1.073507 | 6.822025 | 2.503062 | 0.049575 | 0.239902 | -4.25973 |
| NONHSAT180765.1   | 1.197582 | 2.943265 | 2.502737 | 0.049596 | 0.239974 | -4.26017 |
| NONHSAT196222.1   | 1.087424 | 2.695904 | 2.502418 | 0.049617 | 0.240051 | -4.2606  |
| NONHSAT199055.1   | -1.33907 | 1.819537 | -2.50232 | 0.049623 | 0.240071 | -4.26073 |
| lnc-PPP4R3C-2:2   | -1.19786 | 2.793207 | -2.50175 | 0.04966  | 0.240155 | -4.26149 |
| MSTRG.13807.1     | -1.02925 | 2.549731 | -2.50169 | 0.049663 | 0.240155 | -4.26157 |
| lnc-ZNF502-1:1    | -1.0424  | 3.752993 | -2.50146 | 0.049678 | 0.240157 | -4.26188 |
| NONHSAT218765.1   | 1.451001 | 1.847846 | 2.500541 | 0.049738 | 0.240301 | -4.26312 |
| ENST00000667541.1 | 1.102322 | 2.102137 | 2.499763 | 0.049788 | 0.240429 | -4.26416 |
| lnc-ATP6VOA4-1:1  | -1.38312 | 3.386375 | -2.49966 | 0.049794 | 0.240449 | -4.2643  |
| MSTRG.38762.1     | -1.06642 | 3.709254 | -2.49945 | 0.049808 | 0.240495 | -4.26459 |
| NONHSAT188295.1   | -1.46282 | 3.379928 | -2.49944 | 0.049809 | 0.240495 | -4.26459 |
| MSTRG.41172.1     | -1.09282 | 2.400482 | -2.49897 | 0.049839 | 0.240547 | -4.26523 |
| NONHSAT202187.1   | 1.001595 | 2.433013 | 2.498556 | 0.049866 | 0.240621 | -4.26578 |
| NONHSAT204864.1   | -1.40153 | 2.129543 | -2.49848 | 0.049871 | 0.240632 | -4.26588 |
| NR_033752         | 1.165792 | 8.918187 | 2.49814  | 0.049893 | 0.240704 | -4.26634 |
| ENST00000665842.1 | 1.28689  | 2.530144 | 2.497462 | 0.049937 | 0.240816 | -4.26725 |

|                |          |          |          |          |          |          |
|----------------|----------|----------|----------|----------|----------|----------|
| Inc-THEMIS-4:1 | -2.13651 | 3.773792 | -2.49732 | 0.049946 | 0.240822 | -4.26744 |
|----------------|----------|----------|----------|----------|----------|----------|

Table S5. Identification of different proteins in the HGDILnc1 pull-down group compared to the antisense HGDILnc1 pull-down by Mass spectrometry

| Protein Group | Protein ID | Accession | -10lgP | Coverage (%) | Coverage (%) Sample 1 | Area Sample 1 | #Peptides | #Unique | #Spec Sample 1 | Avg. Mass |
|---------------|------------|-----------|--------|--------------|-----------------------|---------------|-----------|---------|----------------|-----------|
| 127           | 164        | P06733    | 154.75 | 23           | 23                    | 7.07E+06      | 6         | 6       | 12             | 47169     |
| 5             | 42         | P62736    | 146.49 | 25           | 25                    | 0             | 15        | 1       | 69             | 42009     |
| 100           | 109        | Q13085    | 144.59 | 7            | 7                     | 1.76E+06      | 14        | 14      | 14             | 265551    |
| 58            | 170        | P0CG39    | 142.27 | 9            | 9                     | 8.60E+04      | 8         | 1       | 33             | 117390    |
| 178           | 145        | Q71U36    | 128.45 | 20           | 20                    | 1.35E+05      | 7         | 1       | 8              | 50136     |
| 173           | 268        | O60812    | 117.29 | 20           | 20                    | 0             | 6         | 1       | 8              | 32142     |
| 173           | 267        | B7ZW38    | 117.29 | 20           | 20                    | 0             | 6         | 1       | 8              | 32029     |
| 173           | 266        | P0DMR1    | 117.29 | 20           | 20                    | 0             | 6         | 1       | 8              | 32029     |
| 115           | 154        | Q96I24    | 115.41 | 20           | 20                    | 1.02E+06      | 11        | 6       | 14             | 61640     |
| 276           | 272        | P12273    | 114.89 | 36           | 36                    | 8.05E+05      | 4         | 4       | 4              | 16572     |
| 174           | 265        | B2RXH8    | 113.6  | 20           | 20                    | 1.22E+05      | 6         | 1       | 8              | 32072     |
| 285           | 370        | P07148    | 106.67 | 36           | 36                    | 2.23E+06      | 3         | 3       | 4              | 14208     |
| 195           | 200        | P61604    | 102.98 | 62           | 62                    | 7.62E+06      | 7         | 7       | 7              | 10932     |
| 212           | 238        | Q96PU8    | 101.38 | 21           | 21                    | 1.15E+06      | 5         | 5       | 6              | 37671     |
| 247           | 341        | P05387    | 99.87  | 34           | 34                    | 1.39E+06      | 3         | 3       | 4              | 11665     |
| 235           | 244        | P12235    | 98.02  | 16           | 16                    | 5.68E+04      | 5         | 1       | 5              | 33065     |
| 296           | 393        | P31948    | 89     | 9            | 9                     | 1.22E+05      | 3         | 3       | 3              | 62639     |
| 211           | 378        | P62937    | 88.82  | 19           | 19                    | 2.26E+06      | 3         | 3       | 5              | 18012     |
| 306           | 375        | P24534    | 87.14  | 16           | 16                    | 7.46E+05      | 3         | 3       | 3              | 24764     |
| 167           | 369        | P62807    | 86.96  | 26           | 26                    | 2.33E+05      | 3         | 1       | 9              | 13906     |
| 167           | 368        | P57053    | 86.96  | 26           | 26                    | 2.33E+05      | 3         | 1       | 9              | 13944     |
| 167           | 367        | Q99877    | 86.96  | 26           | 26                    | 2.33E+05      | 3         | 1       | 9              | 13922     |
| 167           | 366        | Q5QNW6    | 86.96  | 26           | 26                    | 2.33E+05      | 3         | 1       | 9              | 13920     |
| 167           | 365        | Q93079    | 86.96  | 26           | 26                    | 2.33E+05      | 3         | 1       | 9              | 13892     |



|     |     |        |       |    |    |          |   |   |   |        |
|-----|-----|--------|-------|----|----|----------|---|---|---|--------|
| 167 | 364 | P58876 | 86.96 | 26 | 26 | 2.33E+05 | 3 | 1 | 9 | 13936  |
| 167 | 363 | Q99879 | 86.96 | 26 | 26 | 2.33E+05 | 3 | 1 | 9 | 13989  |
| 167 | 362 | O60814 | 86.96 | 26 | 26 | 2.33E+05 | 3 | 1 | 9 | 13890  |
| 167 | 361 | Q99880 | 86.96 | 26 | 26 | 2.33E+05 | 3 | 1 | 9 | 13952  |
| 320 | 340 | P25311 | 86    | 11 | 11 | 8.98E+05 | 3 | 3 | 3 | 34259  |
| 268 | 301 | P00558 | 83.63 | 14 | 14 | 3.48E+05 | 4 | 4 | 4 | 44615  |
| 271 | 351 | Q92879 | 81.97 | 7  | 7  | 2.26E+06 | 3 | 3 | 3 | 52063  |
| 275 | 474 | P07737 | 81.16 | 21 | 21 | 3.47E+06 | 2 | 2 | 4 | 15054  |
| 213 | 258 | P14923 | 80.84 | 6  | 6  | 4.29E+05 | 4 | 4 | 5 | 81745  |
| 186 | 311 | Q14204 | 78.27 | 2  | 2  | 4.86E+05 | 5 | 5 | 5 | 532412 |
| 201 | 533 | P49321 | 78.04 | 12 | 12 | 7.21E+05 | 2 | 2 | 7 | 85238  |
| 360 | 459 | P29692 | 76.21 | 9  | 9  | 2.89E+05 | 2 | 2 | 2 | 31122  |
| 277 | 426 | P07339 | 74.75 | 15 | 15 | 2.08E+05 | 3 | 3 | 3 | 44552  |
| 286 | 389 | P27348 | 74.61 | 13 | 13 | 5.17E+05 | 3 | 2 | 4 | 27764  |
| 327 | 417 | P62995 | 74.05 | 10 | 10 | 2.45E+05 | 2 | 2 | 2 | 33666  |
| 449 | 715 | Q9Y5S9 | 73.97 | 15 | 15 | 1.67E+06 | 1 | 1 | 2 | 19889  |
| 336 | 675 | O95777 | 73.43 | 25 | 25 | 1.38E+06 | 1 | 1 | 3 | 10403  |
| 352 | 478 | Q9BQ39 | 73.07 | 4  | 4  | 1.92E+04 | 2 | 1 | 2 | 82565  |
| 299 | 339 | P02788 | 72.94 | 4  | 4  | 1.14E+05 | 3 | 1 | 3 | 78182  |
| 566 | 716 | P02753 | 72.76 | 11 | 11 | 7.29E+04 | 1 | 1 | 1 | 23010  |
| 450 | 717 | Q14257 | 71.35 | 6  | 6  | 9.96E+04 | 1 | 1 | 2 | 36876  |
| 364 | 515 | Q01105 | 71.01 | 5  | 5  | 2.64E+05 | 1 | 1 | 1 | 33489  |
| 364 | 523 | P0DME0 | 71.01 | 5  | 5  | 2.64E+05 | 1 | 1 | 1 | 34882  |
| 420 | 678 | Q9NRR5 | 69.66 | 3  | 3  | 6.76E+05 | 1 | 1 | 2 | 63853  |
| 420 | 718 | Q9UMX0 | 69.66 | 3  | 3  | 6.76E+05 | 1 | 1 | 2 | 62519  |
| 420 | 719 | Q9UHD9 | 69.66 | 3  | 3  | 6.76E+05 | 1 | 1 | 2 | 65696  |
| 335 | 543 | P60903 | 69.64 | 28 | 28 | 1.55E+06 | 2 | 2 | 3 | 11203  |
| 451 | 720 | Q9HAF1 | 68.73 | 12 | 12 | 2.26E+05 | 1 | 1 | 2 | 21635  |

|     |     |        |       |    |    |          |   |   |   |        |
|-----|-----|--------|-------|----|----|----------|---|---|---|--------|
| 432 | 557 | O00299 | 68.6  | 15 | 15 | 1.13E+05 | 2 | 2 | 2 | 26923  |
| 274 | 412 | O14556 | 68.46 | 6  | 6  | 0        | 2 | 1 | 3 | 44501  |
| 330 | 472 | Q86SE5 | 67.96 | 7  | 7  | 1.16E+05 | 2 | 1 | 3 | 32331  |
| 510 | 672 | O95865 | 67.59 | 7  | 7  | 2.47E+04 | 1 | 1 | 1 | 29644  |
| 280 | 382 | Q9UNX3 | 67.38 | 17 | 17 | 1.76E+06 | 4 | 4 | 4 | 17256  |
| 511 | 617 | P13667 | 67.32 | 3  | 3  | 8.11E+04 | 1 | 1 | 1 | 72933  |
| 302 | 402 | Q13201 | 67.32 | 2  | 2  | 2.35E+04 | 2 | 2 | 2 | 138110 |
| 311 | 595 | P55795 | 67.01 | 6  | 6  | 4.35E+05 | 2 | 1 | 3 | 49264  |
| 376 | 486 | P26368 | 66.82 | 6  | 6  | 1.53E+05 | 2 | 2 | 2 | 53501  |
| 303 | 413 | Q12996 | 66.14 | 3  | 3  | 4.69E+05 | 2 | 2 | 2 | 82922  |
| 220 | 410 | Q9UPN3 | 66.02 | 0  | 0  | 7.89E+04 | 2 | 2 | 2 | 838323 |
| 419 | 674 | P63173 | 64.47 | 19 | 19 | 1.27E+05 | 2 | 2 | 2 | 8218   |
| 422 | 721 | Q9NQ50 | 64.38 | 9  | 9  | 5.87E+05 | 1 | 1 | 2 | 24490  |
| 567 | 722 | P45973 | 63.99 | 8  | 8  | 1.01E+05 | 1 | 1 | 1 | 22225  |
| 456 | 605 | O75822 | 63.76 | 10 | 10 | 7.35E+04 | 1 | 1 | 1 | 29062  |
| 483 | 620 | Q13404 | 63.72 | 14 | 14 | 1.84E+05 | 1 | 1 | 1 | 16495  |
| 483 | 723 | Q15819 | 63.72 | 14 | 14 | 1.84E+05 | 1 | 1 | 1 | 16363  |
| 399 | 494 | P57721 | 63.37 | 7  | 7  | 5.01E+05 | 2 | 1 | 2 | 39465  |
| 97  | 229 | P17066 | 63.22 | 5  | 5  | 0        | 5 | 1 | 5 | 71028  |
| 506 | 641 | P09382 | 63.21 | 12 | 12 | 3.61E+05 | 1 | 1 | 1 | 14716  |
| 568 | 724 | O60927 | 62.8  | 20 | 20 | 4.43E+05 | 1 | 1 | 1 | 13952  |
| 252 | 725 | Q13185 | 61.65 | 9  | 9  | 2.30E+06 | 1 | 1 | 5 | 20811  |
| 252 | 726 | P83916 | 61.65 | 9  | 9  | 2.30E+06 | 1 | 1 | 5 | 21418  |
| 452 | 727 | Q9NWV4 | 59.73 | 20 | 20 | 1.90E+05 | 1 | 1 | 2 | 18048  |
| 110 | 499 | P22090 | 59.33 | 10 | 10 | 1.07E+05 | 3 | 1 | 4 | 29456  |
| 429 | 544 | P42224 | 57.43 | 4  | 4  | 2.49E+05 | 2 | 2 | 2 | 87335  |
| 569 | 728 | Q92922 | 56.49 | 3  | 3  | 3.40E+04 | 1 | 1 | 1 | 122867 |
| 570 | 729 | P41208 | 55.73 | 10 | 10 | 2.36E+05 | 1 | 1 | 1 | 19738  |

|     |     |        |       |    |    |          |   |   |   |        |
|-----|-----|--------|-------|----|----|----------|---|---|---|--------|
| 513 | 680 | Q6P587 | 55.5  | 7  | 7  | 3.98E+04 | 1 | 1 | 1 | 24843  |
| 288 | 397 | P33240 | 54.29 | 5  | 5  | 1.97E+05 | 3 | 2 | 4 | 60959  |
| 408 | 527 | Q9Y265 | 53.97 | 6  | 6  | 1.63E+04 | 2 | 2 | 2 | 50228  |
| 361 | 469 | Q04637 | 53.27 | 1  | 1  | 1.89E+05 | 2 | 2 | 2 | 175490 |
| 571 | 733 | P20810 | 48.9  | 3  | 3  | 3.90E+04 | 1 | 1 | 1 | 76573  |
| 443 | 626 | Q96CT7 | 48.05 | 6  | 6  | 5.95E+04 | 1 | 1 | 1 | 25835  |
| 403 | 518 | P42285 | 48.03 | 2  | 2  | 3.41E+04 | 2 | 2 | 2 | 117805 |
| 341 | 414 | P07237 | 47.68 | 5  | 5  | 3.67E+05 | 3 | 3 | 3 | 57116  |
| 573 | 735 | O15371 | 47.6  | 2  | 2  | 7.49E+04 | 1 | 1 | 1 | 63973  |
| 574 | 736 | P62857 | 46.79 | 16 | 16 | 5.89E+04 | 1 | 1 | 1 | 7841   |
| 405 | 520 | Q99439 | 46.23 | 6  | 6  | 3.36E+05 | 2 | 1 | 2 | 33697  |
| 575 | 737 | P49720 | 45.4  | 9  | 9  | 0        | 1 | 1 | 1 | 22949  |
| 576 | 739 | A6NKH3 | 45.38 | 9  | 9  | 3.34E+05 | 1 | 1 | 1 | 10583  |
| 346 | 609 | P06276 | 44.84 | 5  | 5  | 0        | 2 | 1 | 3 | 68418  |
| 516 | 686 | Q8IVM0 | 44.8  | 4  | 4  | 4.21E+04 | 1 | 1 | 1 | 35822  |
| 477 | 594 | P42167 | 44.49 | 6  | 6  | 1.52E+05 | 1 | 1 | 1 | 50670  |
| 366 | 569 | P17096 | 44.31 | 26 | 26 | 1.56E+06 | 2 | 2 | 2 | 11676  |
| 577 | 740 | P49458 | 44.17 | 13 | 13 | 2.15E+05 | 1 | 1 | 1 | 10112  |
| 515 | 685 | O75368 | 42.84 | 16 | 16 | 2.98E+04 | 1 | 1 | 1 | 12774  |
| 382 | 526 | Q14694 | 42.18 | 3  | 3  | 1.08E+05 | 2 | 2 | 2 | 87134  |
| 582 | 745 | Q96P63 | 41.62 | 4  | 4  | 6.98E+04 | 1 | 1 | 1 | 46276  |
| 400 | 501 | Q96C19 | 41.27 | 7  | 7  | 4.83E+05 | 2 | 2 | 2 | 26697  |
| 440 | 601 | P31483 | 41.11 | 7  | 7  | 3.74E+05 | 2 | 2 | 2 | 42963  |
| 583 | 748 | P12277 | 40.14 | 4  | 4  | 2.43E+05 | 1 | 1 | 1 | 42644  |
| 517 | 687 | Q99714 | 39.78 | 8  | 8  | 5.31E+04 | 1 | 1 | 1 | 26923  |
| 585 | 751 | Q14498 | 39.02 | 2  | 2  | 2.33E+04 | 1 | 1 | 1 | 59380  |
| 586 | 753 | P17081 | 38.92 | 5  | 5  | 3.66E+05 | 1 | 1 | 1 | 22659  |
| 383 | 553 | Q8IZP2 | 38.26 | 10 | 10 | 1.75E+05 | 2 | 2 | 2 | 27407  |

|     |       |        |       |   |   |          |   |   |   |        |
|-----|-------|--------|-------|---|---|----------|---|---|---|--------|
| 383 | 555   | P50502 | 38.26 | 6 | 6 | 1.75E+05 | 2 | 2 | 2 | 41332  |
| 383 | 623   | Q8NFI4 | 38.26 | 6 | 6 | 1.75E+05 | 2 | 2 | 2 | 41378  |
| 590 | 760   | P02042 | 38.24 | 7 | 7 | 2.24E+05 | 1 | 1 | 1 | 16055  |
| 590 | 759   | P69891 | 38.24 | 7 | 7 | 2.24E+05 | 1 | 1 | 1 | 16140  |
| 591 | 765   | Q5JTV8 | 37.44 | 2 | 2 | 5.90E+04 | 1 | 1 | 1 | 66248  |
| 593 | 768   | P51149 | 35.93 | 6 | 6 | 2.28E+04 | 1 | 1 | 1 | 23490  |
| 520 | 698   | Q08J23 | 35.53 | 1 | 1 | 1.61E+05 | 1 | 1 | 1 | 86471  |
| 277 | 13035 | P35321 | 35.37 | 9 | 9 | 1.65E+05 | 1 | 1 | 1 | 9877   |
| 277 | 13034 | P22528 | 35.37 | 9 | 9 | 1.65E+05 | 1 | 1 | 1 | 9888   |
| 484 | 622   | O94979 | 35.28 | 1 | 1 | 1.20E+05 | 1 | 1 | 1 | 133015 |
| 444 | 654   | O75223 | 35.18 | 6 | 6 | 1.16E+05 | 1 | 1 | 1 | 21008  |
| 363 | 504   | Q9UJ83 | 35.15 | 4 | 4 | 1.76E+05 | 2 | 2 | 2 | 63729  |
| 595 | 773   | Q9Y295 | 34.93 | 3 | 3 | 1.12E+05 | 1 | 1 | 1 | 40542  |
| 491 | 658   | P48594 | 34.59 | 3 | 3 | 3.20E+04 | 1 | 1 | 1 | 44854  |
| 491 | 657   | P29508 | 34.59 | 3 | 3 | 3.20E+04 | 1 | 1 | 1 | 44565  |
| 491 | 700   | P30740 | 34.59 | 3 | 3 | 3.20E+04 | 1 | 1 | 1 | 42742  |
| 491 | 701   | P50452 | 34.59 | 3 | 3 | 3.20E+04 | 1 | 1 | 1 | 42767  |
| 491 | 702   | O75830 | 34.59 | 2 | 2 | 3.20E+04 | 1 | 1 | 1 | 46145  |
| 491 | 776   | P50453 | 34.59 | 3 | 3 | 3.20E+04 | 1 | 1 | 1 | 42404  |
| 414 | 660   | Q8TAV4 | 34.3  | 5 | 5 | 9.05E+05 | 2 | 2 | 2 | 32135  |
| 156 | 397   | Q14141 | 33.93 | 4 | 4 | 5.20E+04 | 2 | 1 | 3 | 49717  |
| 156 | 496   | Q92599 | 33.93 | 3 | 3 | 5.20E+04 | 2 | 1 | 3 | 55756  |
| 370 | 559   | P49591 | 33.91 | 2 | 2 | 1.09E+05 | 1 | 1 | 1 | 58777  |
| 597 | 777   | P84022 | 33.86 | 3 | 3 | 6.55E+04 | 1 | 1 | 1 | 48081  |
| 597 | 779   | Q15797 | 33.86 | 2 | 2 | 6.55E+04 | 1 | 1 | 1 | 52260  |
| 597 | 778   | Q99717 | 33.86 | 2 | 2 | 6.55E+04 | 1 | 1 | 1 | 52258  |
| 597 | 781   | O15198 | 33.86 | 2 | 2 | 6.55E+04 | 1 | 1 | 1 | 52493  |
| 597 | 780   | Q15796 | 33.86 | 2 | 2 | 6.55E+04 | 1 | 1 | 1 | 52306  |

|     |       |        |       |    |    |          |   |   |   |        |
|-----|-------|--------|-------|----|----|----------|---|---|---|--------|
| 598 | 785   | O15131 | 33.3  | 2  | 2  | 4.91E+04 | 1 | 1 | 1 | 60349  |
| 598 | 784   | O60684 | 33.3  | 2  | 2  | 4.91E+04 | 1 | 1 | 1 | 60030  |
| 598 | 786   | P52294 | 33.3  | 2  | 2  | 4.91E+04 | 1 | 1 | 1 | 60222  |
| 521 | 704   | Q92552 | 32.69 | 3  | 3  | 1.35E+04 | 1 | 1 | 1 | 47611  |
| 228 | 808   | P10599 | 32.51 | 9  | 9  | 7.07E+04 | 1 | 1 | 1 | 11737  |
| 600 | 798   | P50579 | 32.34 | 3  | 3  | 2.20E+04 | 1 | 1 | 1 | 52892  |
| 601 | 803   | P21108 | 32.08 | 4  | 4  | 4.66E+04 | 1 | 1 | 1 | 34839  |
| 601 | 802   | P11908 | 32.08 | 4  | 4  | 4.66E+04 | 1 | 1 | 1 | 34769  |
| 601 | 801   | P60891 | 32.08 | 4  | 4  | 4.66E+04 | 1 | 1 | 1 | 34834  |
| 355 | 602   | B2RPK0 | 31.92 | 11 | 11 | 1.28E+06 | 2 | 2 | 2 | 24238  |
| 172 | 648   | P05165 | 31.83 | 2  | 2  | 5.60E+04 | 2 | 2 | 2 | 80059  |
| 226 | 13037 | P17858 | 31.77 | 1  | 1  | 1.70E+05 | 1 | 1 | 1 | 85018  |
| 226 | 6751  | P08237 | 31.77 | 1  | 1  | 1.70E+05 | 1 | 1 | 1 | 85183  |
| 523 | 712   | P33176 | 30.81 | 2  | 2  | 5.46E+04 | 1 | 1 | 1 | 109685 |
| 469 | 651   | Q13561 | 30.74 | 4  | 4  | 0        | 1 | 1 | 1 | 44231  |
| 467 | 630   | Q15393 | 30.67 | 1  | 1  | 4.68E+04 | 1 | 1 | 1 | 135577 |
| 524 | 713   | Q13418 | 30.57 | 2  | 2  | 1.00E+05 | 1 | 1 | 1 | 51419  |
| 453 | 838   | Q13425 | 30.56 | 2  | 2  | 7.68E+04 | 1 | 1 | 1 | 57950  |
| 604 | 833   | O43324 | 30.54 | 6  | 6  | 8.19E+04 | 1 | 1 | 1 | 19811  |
| 605 | 834   | P31944 | 30.1  | 4  | 4  | 1.24E+05 | 1 | 1 | 1 | 27680  |
| 610 | 846   | P55327 | 29.2  | 14 | 14 | 2.33E+05 | 1 | 1 | 1 | 24327  |
| 493 | 764   | Q9BVV6 | 29.14 | 1  | 1  | 0        | 1 | 1 | 1 | 169306 |
| 518 | 691   | Q13595 | 28.44 | 3  | 3  | 4.73E+04 | 1 | 1 | 1 | 32689  |
| 527 | 794   | Q96AC1 | 27.9  | 1  | 1  | 7.90E+04 | 1 | 1 | 1 | 77861  |
| 197 | 128   | Q9BVA1 | 27.51 | 2  | 2  | 2.10E+05 | 1 | 1 | 1 | 49953  |
| 197 | 127   | Q13885 | 27.51 | 2  | 2  | 2.10E+05 | 1 | 1 | 1 | 49907  |
| 197 | 240   | A6NNZ2 | 27.51 | 2  | 2  | 2.10E+05 | 1 | 1 | 1 | 49573  |
| 197 | 236   | Q3ZCM7 | 27.51 | 2  | 2  | 2.10E+05 | 1 | 1 | 1 | 49776  |

|     |       |        |       |    |    |          |   |   |   |        |
|-----|-------|--------|-------|----|----|----------|---|---|---|--------|
| 197 | 504   | Q9H4B7 | 27.51 | 2  | 2  | 2.10E+05 | 1 | 1 | 1 | 50327  |
| 284 | 13045 | P50461 | 27.14 | 5  | 5  | 0        | 1 | 1 | 1 | 20969  |
| 470 | 661   | Q14966 | 26.38 | 0  | 0  | 1.17E+06 | 1 | 1 | 1 | 220623 |
| 612 | 873   | O95400 | 26.21 | 7  | 7  | 2.38E+04 | 1 | 1 | 1 | 37646  |
| 613 | 874   | Q5SSJ5 | 26.12 | 2  | 2  | 3.42E+04 | 1 | 1 | 1 | 61207  |
| 191 | 2246  | Q8IWZ3 | 26.09 | 0  | 0  | 1.90E+04 | 1 | 1 | 1 | 269455 |
| 615 | 876   | P42765 | 26.05 | 2  | 2  | 1.17E+05 | 1 | 1 | 1 | 41924  |
| 614 | 875   | Q96HY6 | 26.04 | 5  | 5  | 2.34E+04 | 1 | 1 | 1 | 35611  |
| 531 | 835   | Q8TCY9 | 26.01 | 1  | 1  | 0        | 1 | 1 | 1 | 104987 |
| 530 | 824   | Q8N163 | 25.98 | 2  | 2  | 2.33E+04 | 1 | 1 | 1 | 102902 |
| 212 | 572   | Q92901 | 25.87 | 2  | 2  | 2.36E+05 | 1 | 1 | 1 | 46296  |
| 494 | 855   | Q71UI9 | 25.1  | 7  | 7  | 2.60E+06 | 1 | 1 | 1 | 13509  |
| 494 | 853   | P0C0S5 | 25.1  | 7  | 7  | 2.60E+06 | 1 | 1 | 1 | 13553  |
| 617 | 890   | P22735 | 25    | 2  | 2  | 2.27E+04 | 1 | 1 | 1 | 89787  |
| 618 | 897   | Q13177 | 24.59 | 5  | 5  | 0        | 1 | 1 | 1 | 58043  |
| 620 | 899   | P31949 | 24.31 | 9  | 9  | 1.07E+05 | 1 | 1 | 1 | 11740  |
| 621 | 902   | P49448 | 24.12 | 1  | 1  | 2.35E+04 | 1 | 1 | 1 | 61434  |
| 621 | 901   | P00367 | 24.12 | 1  | 1  | 2.35E+04 | 1 | 1 | 1 | 61398  |
| 623 | 905   | P02008 | 24.04 | 5  | 5  | 4.14E+05 | 1 | 1 | 1 | 15637  |
| 464 | 529   | Q02413 | 24.03 | 2  | 2  | 1.31E+05 | 1 | 1 | 1 | 113748 |
| 626 | 911   | Q96HS1 | 23.91 | 2  | 2  | 2.61E+05 | 1 | 1 | 1 | 32004  |
| 238 | 1853  | Q8TF72 | 23.91 | 0  | 0  | 1.14E+06 | 1 | 1 | 1 | 216856 |
| 258 | 13053 | O43583 | 23.9  | 4  | 4  | 0        | 1 | 1 | 1 | 22092  |
| 624 | 908   | Q8WVM8 | 23.77 | 2  | 2  | 7.14E+04 | 1 | 1 | 1 | 72380  |
| 625 | 910   | Q9Y5L4 | 23.56 | 15 | 15 | 2.85E+04 | 1 | 1 | 1 | 10500  |
| 239 | 603   | Q96A08 | 23.54 | 6  | 6  | 5.33E+05 | 1 | 1 | 1 | 14167  |
| 261 | 8497  | Q14676 | 23.49 | 0  | 0  | 3.14E+04 | 1 | 1 | 1 | 226664 |
| 183 | 2827  | P24043 | 23.4  | 0  | 0  | 2.26E+05 | 1 | 1 | 1 | 343906 |

|     |       |        |       |   |   |          |   |   |   |        |
|-----|-------|--------|-------|---|---|----------|---|---|---|--------|
| 183 | 13060 | Q9H2M9 | 23.4  | 1 | 1 | 2.26E+05 | 1 | 1 | 1 | 155984 |
| 492 | 703   | O75874 | 23.29 | 3 | 3 | 1.03E+05 | 1 | 1 | 1 | 46659  |
| 627 | 916   | P54727 | 23.25 | 4 | 4 | 3.46E+05 | 1 | 1 | 1 | 43171  |
| 217 | 192   | P0DPH7 | 22.77 | 2 | 2 | 7.55E+04 | 1 | 1 | 1 | 49960  |
| 217 | 271   | P68366 | 22.77 | 2 | 2 | 7.55E+04 | 1 | 1 | 1 | 49924  |
| 217 | 98    | Q9BQE3 | 22.77 | 2 | 2 | 7.55E+04 | 1 | 1 | 1 | 49895  |
| 217 | 191   | P0DPH8 | 22.77 | 2 | 2 | 7.55E+04 | 1 | 1 | 1 | 49960  |
| 216 | 794   | P02452 | 22.76 | 1 | 1 | 1.54E+05 | 1 | 1 | 1 | 138942 |
| 423 | 912   | O43852 | 22.7  | 8 | 8 | 1.56E+04 | 1 | 1 | 2 | 37107  |
| 192 | 1175  | P54132 | 22.69 | 1 | 1 | 1.10E+05 | 1 | 1 | 1 | 159000 |
| 538 | 915   | Q9NP90 | 22.4  | 5 | 5 | 2.47E+05 | 1 | 1 | 1 | 22719  |
| 538 | 945   | P59190 | 22.4  | 5 | 5 | 2.47E+05 | 1 | 1 | 1 | 24391  |
| 290 | 4718  | Q14721 | 22.39 | 1 | 1 | 0        | 1 | 1 | 1 | 95878  |
| 268 | 13062 | Q9P0V9 | 22.35 | 2 | 2 | 5.90E+04 | 1 | 1 | 1 | 52593  |
| 268 | 10357 | Q9UH03 | 22.35 | 3 | 3 | 5.90E+04 | 1 | 1 | 1 | 40704  |
| 242 | 232   | Q9BZZ5 | 22.32 | 2 | 2 | 6.39E+04 | 1 | 1 | 1 | 59005  |
| 539 | 919   | Q14157 | 22.24 | 2 | 2 | 5.84E+04 | 1 | 1 | 1 | 114534 |
| 540 | 921   | P09471 | 22.17 | 3 | 3 | 1.57E+05 | 1 | 1 | 1 | 40051  |
| 540 | 965   | Q14344 | 22.17 | 3 | 3 | 1.57E+05 | 1 | 1 | 1 | 44050  |
| 540 | 967   | Q03113 | 22.17 | 3 | 3 | 1.57E+05 | 1 | 1 | 1 | 44279  |
| 270 | 1107  | Q6NXT2 | 22.11 | 5 | 5 | 3.07E+05 | 1 | 1 | 1 | 15214  |
| 533 | 868   | Q8WUM4 | 21.99 | 1 | 1 | 0        | 1 | 1 | 1 | 96023  |
| 634 | 974   | Q9BTW9 | 21.94 | 1 | 1 | 3.95E+05 | 1 | 1 | 1 | 132600 |
| 635 | 924   | P54253 | 21.89 | 1 | 1 | 2.26E+05 | 1 | 1 | 1 | 86923  |
| 272 | 6287  | Q9NRE2 | 21.62 | 1 | 1 | 0        | 1 | 1 | 1 | 115005 |
| 462 | 871   | P15924 | 21.56 | 0 | 0 | 1.11E+05 | 1 | 1 | 1 | 331774 |
| 636 | 979   | Q86UE4 | 21.5  | 2 | 2 | 2.12E+05 | 1 | 1 | 1 | 63837  |
| 638 | 982   | O75340 | 21.48 | 5 | 5 | 3.76E+04 | 1 | 1 | 1 | 21868  |

|     |       |        |       |   |   |          |   |   |   |        |
|-----|-------|--------|-------|---|---|----------|---|---|---|--------|
| 294 | 13069 | Q969Q0 | 21.34 | 8 | 8 | 9.49E+04 | 1 | 1 | 1 | 12469  |
| 245 | 4053  | P22087 | 21.31 | 3 | 3 | 4.26E+04 | 1 | 1 | 1 | 33784  |
| 245 | 13068 | A6NHQ2 | 21.31 | 3 | 3 | 4.26E+04 | 1 | 1 | 1 | 34803  |
| 641 | 987   | O15344 | 21.18 | 3 | 3 | 2.19E+05 | 1 | 1 | 1 | 75251  |
| 541 | 928   | Q9H9S3 | 21.09 | 2 | 2 | 1.24E+05 | 1 | 1 | 1 | 52248  |
| 642 | 988   | P08572 | 21.06 | 1 | 1 | 1.03E+05 | 1 | 1 | 1 | 167553 |
| 424 | 930   | Q08554 | 21.04 | 2 | 2 | 3.66E+04 | 1 | 1 | 1 | 99987  |
| 275 | 5019  | O60610 | 21.03 | 2 | 2 | 6.21E+04 | 1 | 1 | 1 | 141347 |
| 181 | 1615  | A7E2Y1 | 20.95 | 0 | 0 | 1.05E+05 | 1 | 1 | 1 | 225843 |
| 247 | 13073 | Q9ULK4 | 20.86 | 1 | 1 | 1.74E+05 | 1 | 1 | 1 | 156473 |
| 647 | 995   | Q10589 | 20.81 | 4 | 4 | 0        | 1 | 1 | 1 | 19769  |
| 648 | 996   | Q13243 | 20.78 | 3 | 3 | 2.52E+05 | 1 | 1 | 1 | 31264  |
| 648 | 998   | Q13247 | 20.78 | 3 | 3 | 2.52E+05 | 1 | 1 | 1 | 39587  |
| 648 | 999   | Q08170 | 20.78 | 2 | 2 | 2.52E+05 | 1 | 1 | 1 | 56678  |
| 649 | 1009  | O00442 | 20.6  | 2 | 2 | 1.50E+06 | 1 | 1 | 1 | 39337  |
| 496 | 880   | Q9BYK8 | 20.46 | 0 | 0 | 8.88E+04 | 1 | 1 | 1 | 294649 |
| 653 | 1013  | Q8NFT6 | 20.14 | 2 | 2 | 2.15E+06 | 1 | 1 | 1 | 67243  |
| 655 | 1016  | Q9NZM1 | 20.05 | 1 | 1 | 7.31E+04 | 1 | 1 | 1 | 234706 |
| 656 | 1018  | P30041 | 20.05 | 4 | 4 | 6.14E+04 | 1 | 1 | 1 | 25035  |
| 546 | 971   | P39748 | 20    | 2 | 2 | 1.99E+05 | 1 | 1 | 1 | 42593  |





Table S6. Significant different expression of mRNA after HGDILnc1 knockdown.

| SYMBOL    | logFC    | logCPM   | PValue    | FDR       |
|-----------|----------|----------|-----------|-----------|
| HAL       | -3.2712  | 6.520292 | 3.50E-119 | 8.55E-115 |
| IGFBP1    | -2.76111 | 11.07292 | 7.88E-107 | 9.63E-103 |
| CA9       | -3.43572 | 4.970436 | 3.32E-84  | 2.70E-80  |
| STC2      | -2.30575 | 6.644919 | 4.63E-72  | 2.83E-68  |
| DDIT4     | -1.84768 | 8.462628 | 2.03E-57  | 9.90E-54  |
| ALDOC     | -2.39734 | 5.372477 | 2.94E-53  | 1.20E-49  |
| HDAC11    | -1.85321 | 6.680445 | 7.26E-48  | 2.53E-44  |
| SERPINE1  | -2.75489 | 4.622899 | 7.32E-46  | 2.24E-42  |
| PPP1R15A  | 1.75098  | 6.659637 | 7.68E-45  | 2.08E-41  |
| H19       | -2.28555 | 5.711457 | 5.61E-41  | 1.37E-37  |
| PSAT1     | -1.59383 | 8.042648 | 7.14E-41  | 1.59E-37  |
| INHBE     | -2.73272 | 4.363555 | 7.64E-40  | 1.55E-36  |
| GDF15     | -1.62362 | 9.552687 | 4.76E-39  | 8.95E-36  |
| PHGDH     | -1.92769 | 6.264504 | 4.27E-38  | 7.45E-35  |
| IGFBP3    | -1.57502 | 8.501782 | 2.15E-37  | 3.50E-34  |
| NDRG1     | -1.83392 | 5.326546 | 4.54E-37  | 6.93E-34  |
| FABP1     | -1.58229 | 6.733578 | 4.87E-37  | 7.00E-34  |
| SDS       | -2.06154 | 5.056807 | 9.01E-37  | 1.22E-33  |
| TRIB3     | -1.81811 | 5.662201 | 3.32E-36  | 4.27E-33  |
| ITGB4     | -1.59086 | 6.62366  | 2.92E-35  | 3.57E-32  |
| AMDHD1    | -1.55811 | 6.543797 | 4.13E-35  | 4.81E-32  |
| MROH3P    | 9.855106 | -0.01151 | 1.00E-34  | 1.11E-31  |
| HSPA8     | 1.474886 | 10.83443 | 3.41E-34  | 3.62E-31  |
| ASNS      | -1.69385 | 7.841802 | 4.04E-34  | 4.12E-31  |
| PCK2      | -1.70765 | 7.093445 | 2.23E-33  | 2.18E-30  |
| S100A14   | -1.64528 | 5.813194 | 5.04E-32  | 4.74E-29  |
| FAM71A    | 9.788184 | -0.07482 | 9.05E-31  | 8.19E-28  |
| ADAM1A    | 3.793371 | 1.625977 | 2.49E-30  | 2.17E-27  |
| CRH       | -1.33027 | 9.451363 | 1.15E-28  | 9.69E-26  |
| OSGIN1    | 1.585665 | 5.303269 | 1.36E-27  | 1.11E-24  |
| ANKRD37   | -2.97653 | 2.992517 | 2.38E-27  | 1.88E-24  |
| MTHFD2    | -1.254   | 7.955938 | 3.74E-27  | 2.86E-24  |
| FGF18     | 6.562095 | -0.04875 | 7.34E-27  | 5.44E-24  |
| F2        | -1.30305 | 6.93037  | 1.17E-26  | 8.38E-24  |
| BHLHE41   | 6.455022 | -0.16117 | 1.55E-26  | 1.09E-23  |
| IDH2      | -1.25985 | 7.643307 | 1.88E-26  | 1.28E-23  |
| TMEM230   | 1.386294 | 5.804345 | 2.02E-26  | 1.33E-23  |
| CYP24A1   | -1.24476 | 9.124385 | 2.63E-25  | 1.69E-22  |
| TCIM      | -1.37559 | 8.470645 | 6.61E-25  | 4.14E-22  |
| NBEAP3    | -9.9826  | 0.093635 | 9.02E-25  | 5.51E-22  |
| LINC00313 | -2.71661 | 2.586432 | 1.96E-24  | 1.17E-21  |
| MYO1D     | -1.18486 | 7.702432 | 2.56E-24  | 1.49E-21  |
| SERPING1  | -1.28244 | 6.624349 | 3.10E-24  | 1.76E-21  |
| PCSK9     | -1.18566 | 7.941833 | 3.35E-24  | 1.86E-21  |
| RNA5-8SN3 | 2.943119 | 2.912503 | 5.18E-24  | 2.78E-21  |
| RNA5-8SN2 | 2.946403 | 2.188953 | 5.24E-24  | 2.78E-21  |

|           |          |          |          |          |
|-----------|----------|----------|----------|----------|
| SLC16A3   | -1.40582 | 5.469055 | 5.88E-24 | 3.05E-21 |
| GPX8      | -1.88045 | 4.548887 | 1.21E-23 | 6.15E-21 |
| HILPDA    | -1.3653  | 6.669527 | 1.55E-23 | 7.71E-21 |
| KLF10     | 1.576918 | 5.254523 | 5.60E-23 | 2.74E-20 |
| ACSS2     | -1.22063 | 6.684286 | 7.36E-23 | 3.52E-20 |
| ADAMTSL4  | -1.67063 | 4.464304 | 1.59E-22 | 7.48E-20 |
| NUPR1     | -1.28659 | 6.775076 | 1.94E-22 | 8.94E-20 |
| H1-0      | -1.17183 | 7.203909 | 3.10E-22 | 1.40E-19 |
| CCND2     | 8.89898  | -0.9201  | 5.00E-22 | 2.22E-19 |
| LRP1      | -1.24186 | 7.266623 | 1.06E-21 | 4.64E-19 |
| CBS       | -1.2816  | 7.108638 | 1.58E-21 | 6.76E-19 |
| CXCR5     | 9.663357 | -0.19109 | 3.02E-21 | 1.27E-18 |
| AKAP12    | -1.27832 | 8.823417 | 3.25E-21 | 1.34E-18 |
| A2M       | -1.07888 | 12.60893 | 3.49E-21 | 1.42E-18 |
| PRECSIT   | 5.842113 | -0.4436  | 5.51E-21 | 2.21E-18 |
| PRKCA     | -1.17256 | 7.287423 | 1.03E-20 | 4.06E-18 |
| TNS1      | -2.09616 | 3.271925 | 1.17E-20 | 4.55E-18 |
| SPAG4     | -2.10042 | 3.514013 | 1.72E-20 | 6.55E-18 |
| SPON1     | 8.685053 | -1.11722 | 2.38E-20 | 8.94E-18 |
| PYGM      | 5.34417  | 0.62653  | 3.83E-20 | 1.42E-17 |
| PYGL      | -1.22773 | 5.662246 | 4.17E-20 | 1.52E-17 |
| C1RL      | -1.31492 | 5.564276 | 6.25E-20 | 2.25E-17 |
| SLC1A4    | -1.36264 | 5.269246 | 6.93E-20 | 2.45E-17 |
| CFAP251   | 3.769192 | 1.488079 | 8.91E-20 | 3.11E-17 |
| GARS1     | -1.02706 | 8.626545 | 1.88E-19 | 6.46E-17 |
| AHSG      | -1.75947 | 4.30311  | 2.14E-19 | 7.24E-17 |
| LHPP      | -1.43035 | 4.889894 | 2.27E-19 | 7.61E-17 |
| SNORD3B-1 | 3.683901 | 0.530159 | 2.99E-19 | 9.86E-17 |
| SYNE1     | 1.657769 | 4.30709  | 3.06E-19 | 9.96E-17 |
| CP        | -1.1858  | 9.092945 | 3.11E-19 | 9.99E-17 |
| SCARA5    | -1.36976 | 4.899844 | 4.06E-19 | 1.29E-16 |
| GAA       | -1.45784 | 4.958727 | 5.00E-19 | 1.56E-16 |
| SEMA4B    | -1.25658 | 5.493917 | 5.92E-19 | 1.83E-16 |
| UCKL1-AS1 | 4.154108 | 0.528896 | 6.22E-19 | 1.89E-16 |
| IER3      | -1.09086 | 7.781036 | 6.28E-19 | 1.89E-16 |
| ANGPTL8   | -2.68843 | 2.47409  | 1.60E-18 | 4.77E-16 |
| APOL6     | -1.68916 | 4.038175 | 2.13E-18 | 6.28E-16 |
| KIF21B    | -2.59333 | 4.111907 | 2.31E-18 | 6.73E-16 |
| ALDH1L2   | -2.44434 | 2.874696 | 4.23E-18 | 1.22E-15 |
| ZNF610    | 8.571417 | -1.21558 | 5.56E-18 | 1.58E-15 |
| UTP14A    | 1.14786  | 5.940536 | 6.96E-18 | 1.95E-15 |
| HPN       | -1.67113 | 4.032525 | 7.89E-18 | 2.19E-15 |
| PMEPA1    | 5.586647 | -0.08704 | 8.72E-18 | 2.39E-15 |
| FAM13B    | 1.656109 | 4.569071 | 1.30E-17 | 3.52E-15 |
| AC012236  | -3.29032 | 0.878027 | 1.61E-17 | 4.32E-15 |
| SLC45A3   | -1.48229 | 4.562058 | 1.72E-17 | 4.55E-15 |
| BNIP3     | -1.0497  | 6.806153 | 1.88E-17 | 4.90E-15 |
| BHLHE40   | -1.00426 | 7.255583 | 1.88E-17 | 4.90E-15 |

|           |          |          |          |          |
|-----------|----------|----------|----------|----------|
| GLRX      | -1.05446 | 6.200444 | 2.71E-17 | 6.98E-15 |
| PAQR8     | -1.03259 | 6.127    | 3.32E-17 | 8.46E-15 |
| KDELR3    | -1.14277 | 5.567937 | 3.44E-17 | 8.60E-15 |
| SNHG12    | 1.788301 | 3.55384  | 3.45E-17 | 8.60E-15 |
| MST1P2    | -1.92241 | 3.70738  | 4.37E-17 | 1.08E-14 |
| PECAM1    | -1.28504 | 5.188587 | 4.41E-17 | 1.08E-14 |
| CARS1     | -1.04206 | 6.601521 | 5.91E-17 | 1.43E-14 |
| TP53INP2  | -1.02208 | 6.626482 | 6.10E-17 | 1.46E-14 |
| SLC2A9    | -2.03722 | 2.984047 | 6.53E-17 | 1.55E-14 |
| PEAK3     | 8.667292 | -1.13988 | 9.50E-17 | 2.23E-14 |
| S100A9    | -1.10445 | 7.664801 | 1.05E-16 | 2.44E-14 |
| CKB       | -1.2455  | 5.289761 | 1.24E-16 | 2.87E-14 |
| ARG2      | -1.28956 | 5.11588  | 1.45E-16 | 3.30E-14 |
| ENO2      | -2.18214 | 3.15491  | 1.93E-16 | 4.37E-14 |
| KCNK6     | -1.1567  | 5.28883  | 1.97E-16 | 4.41E-14 |
| SERINC2   | -1.38953 | 4.848099 | 2.47E-16 | 5.50E-14 |
| EFNB2     | 4.358572 | 0.249623 | 4.10E-16 | 9.02E-14 |
| CCNG2     | -1.71756 | 3.709937 | 4.31E-16 | 9.35E-14 |
| BNIP3L    | -1.28491 | 5.136905 | 4.32E-16 | 9.35E-14 |
| JUN       | 1.127604 | 5.334801 | 5.14E-16 | 1.10E-13 |
| LINC01671 | -3.16263 | 1.138795 | 6.23E-16 | 1.32E-13 |
| VLDLR     | -2.16294 | 2.124964 | 6.75E-16 | 1.42E-13 |
| GPR157    | -1.03362 | 6.375892 | 6.85E-16 | 1.43E-13 |
| OTOAP1    | 8.184468 | -1.57251 | 7.26E-16 | 1.49E-13 |
| SLC7A1    | -1.03062 | 6.783539 | 7.93E-16 | 1.61E-13 |
| LIF       | -1.56047 | 3.944987 | 8.60E-16 | 1.72E-13 |
| PLCB1     | -1.31702 | 5.24037  | 9.64E-16 | 1.91E-13 |
| AC004893  | 3.487971 | 0.134722 | 1.13E-15 | 2.21E-13 |
| GCNA      | 3.498614 | 1.170664 | 1.49E-15 | 2.88E-13 |
| CDKL2     | 8.255583 | -1.51208 | 1.68E-15 | 3.21E-13 |
| CFB       | -1.41503 | 4.323604 | 2.06E-15 | 3.88E-13 |
| SCUBE2    | 4.878798 | -0.73541 | 2.25E-15 | 4.20E-13 |
| DHTKD1    | -1.00616 | 5.928806 | 3.22E-15 | 5.88E-13 |
| HMOX1     | 1.039817 | 8.071874 | 3.69E-15 | 6.68E-13 |
| EID3      | 1.841771 | 3.133473 | 4.80E-15 | 8.63E-13 |
| ANKRD1    | 2.372909 | 1.75702  | 6.34E-15 | 1.11E-12 |
| RNA5-8SN1 | 3.07897  | 1.105771 | 6.65E-15 | 1.16E-12 |
| CILP2     | 3.124841 | 0.173583 | 6.68E-15 | 1.16E-12 |
| NR4A1     | -1.00286 | 6.864663 | 7.25E-15 | 1.24E-12 |
| SMARCE1P6 | 8.42314  | -1.35607 | 7.85E-15 | 1.31E-12 |
| CEACAM1   | -1.35989 | 4.889943 | 8.38E-15 | 1.39E-12 |
| BMERB1    | -1.132   | 5.324395 | 1.09E-14 | 1.77E-12 |
| NNMT      | -1.33134 | 4.697966 | 2.22E-14 | 3.57E-12 |
| FADS2     | -1.2919  | 5.249806 | 3.30E-14 | 5.21E-12 |
| NECAB2    | 3.263542 | -0.14502 | 3.43E-14 | 5.35E-12 |
| FXVD2     | -1.06025 | 7.883985 | 3.44E-14 | 5.35E-12 |
| WIPF3     | -1.63854 | 3.504223 | 4.27E-14 | 6.60E-12 |
| ATP2B2    | -3.061   | 0.287682 | 5.29E-14 | 8.02E-12 |

|           |          |          |          |          |
|-----------|----------|----------|----------|----------|
| MINDY2    | 1.819568 | 3.320135 | 5.80E-14 | 8.68E-12 |
| MST1L     | -1.92325 | 2.967088 | 6.29E-14 | 9.37E-12 |
| NPM1P46   | 7.971933 | -1.75891 | 6.39E-14 | 9.46E-12 |
| CHRNA10   | 2.396076 | 0.820291 | 9.23E-14 | 1.34E-11 |
| WIPI1     | -1.06864 | 6.744356 | 1.22E-13 | 1.75E-11 |
| AC091173  | 4.652842 | -0.44111 | 1.24E-13 | 1.78E-11 |
| QRICH2    | 2.238021 | 2.17006  | 1.32E-13 | 1.88E-11 |
| GAL3ST1   | -2.20216 | 1.458189 | 1.71E-13 | 2.41E-11 |
| UBE2L6    | -1.27853 | 4.383547 | 1.81E-13 | 2.53E-11 |
| MUC2      | -2.32808 | 2.848725 | 2.15E-13 | 2.95E-11 |
| CDC25A    | 1.022347 | 5.500157 | 2.31E-13 | 3.14E-11 |
| FERMT3    | 3.459011 | 1.136155 | 2.86E-13 | 3.87E-11 |
| ABCC3     | -1.27183 | 4.430085 | 3.27E-13 | 4.36E-11 |
| THBS1     | 2.289148 | 1.715248 | 3.34E-13 | 4.44E-11 |
| MYO7B     | -2.90123 | 0.74807  | 3.64E-13 | 4.80E-11 |
| UBD       | 1.699143 | 3.924585 | 4.02E-13 | 5.28E-11 |
| MST1      | -1.43485 | 3.896292 | 4.24E-13 | 5.54E-11 |
| SMAD7     | 1.377202 | 3.970812 | 4.60E-13 | 5.94E-11 |
| PDK1      | -1.20563 | 5.39254  | 4.81E-13 | 6.19E-11 |
| VAT1L     | 1.465313 | 3.818052 | 5.02E-13 | 6.42E-11 |
| ABAT      | -1.70968 | 3.068896 | 5.23E-13 | 6.66E-11 |
| LINC00163 | 7.961453 | -1.76263 | 5.62E-13 | 7.11E-11 |
| CTH       | -1.17988 | 4.853964 | 7.43E-13 | 9.31E-11 |
| LRRN4CL   | 8.012523 | -1.72262 | 8.65E-13 | 1.07E-10 |
| NBR2      | -1.82245 | 2.726391 | 1.10E-12 | 1.34E-10 |
| PLK2      | 4.758364 | -0.559   | 1.23E-12 | 1.50E-10 |
| ABCG8     | 7.80494  | -1.90373 | 1.26E-12 | 1.52E-10 |
| P4HA2     | -1.04217 | 5.165893 | 1.27E-12 | 1.53E-10 |
| AL590064  | -1.04091 | 5.227641 | 1.36E-12 | 1.63E-10 |
| FLRT2     | 1.003021 | 5.270856 | 1.42E-12 | 1.69E-10 |
| CERCAM    | -1.00778 | 5.290172 | 1.63E-12 | 1.93E-10 |
| ABCA2     | -1.02345 | 5.204746 | 1.86E-12 | 2.17E-10 |
| HLA-DMB   | -1.00593 | 6.246642 | 1.93E-12 | 2.23E-10 |
| ACHE      | 2.152928 | 1.400034 | 2.39E-12 | 2.75E-10 |
| FXYD3     | -1.22556 | 4.417504 | 2.62E-12 | 2.98E-10 |
| AK7       | -1.37886 | 4.243212 | 2.90E-12 | 3.27E-10 |
| PPFIA4    | -2.82188 | 0.780629 | 3.67E-12 | 4.10E-10 |
| XPNPEP2   | -1.56879 | 3.154901 | 3.85E-12 | 4.28E-10 |
| COL7A1    | 1.565554 | 3.50101  | 4.31E-12 | 4.76E-10 |
| VASH2     | -1.91013 | 1.964521 | 4.97E-12 | 5.47E-10 |
| KCTD12    | 4.008932 | -1.11543 | 5.02E-12 | 5.50E-10 |
| CARMIL2   | 1.925855 | 1.690692 | 5.47E-12 | 5.94E-10 |
| FER1L4    | -1.41756 | 3.805714 | 6.02E-12 | 6.51E-10 |
| LRRC37A3  | 2.347395 | 0.578263 | 6.20E-12 | 6.67E-10 |
| DMTN      | -1.66799 | 3.336422 | 6.23E-12 | 6.68E-10 |
| POP1      | 1.421846 | 4.299998 | 7.53E-12 | 8.00E-10 |
| PKLR      | -1.127   | 5.114027 | 8.16E-12 | 8.59E-10 |
| PDE6G     | 7.769634 | -1.93475 | 8.53E-12 | 8.90E-10 |

|          |          |          |          |          |
|----------|----------|----------|----------|----------|
| ZNF256   | 1.704232 | 2.604523 | 9.38E-12 | 9.71E-10 |
| UPK1A    | -1.11801 | 4.621945 | 1.10E-11 | 1.12E-09 |
| ACTBP14  | 8.05629  | -1.693   | 1.24E-11 | 1.25E-09 |
| FRG2     | 7.674985 | -2.02309 | 1.29E-11 | 1.29E-09 |
| BCAT1    | -1.15862 | 6.551614 | 1.34E-11 | 1.33E-09 |
| KCNB1    | 3.598443 | -0.34786 | 1.47E-11 | 1.45E-09 |
| SCGN     | 8.138662 | -1.59849 | 1.49E-11 | 1.46E-09 |
| AMHR2    | 7.876459 | -1.84151 | 1.82E-11 | 1.78E-09 |
| PLOD2    | -1.34642 | 3.947097 | 2.62E-11 | 2.53E-09 |
| SULF2    | 4.541547 | -1.41123 | 2.68E-11 | 2.58E-09 |
| PABPC1L  | -1.21053 | 5.150529 | 3.28E-11 | 3.12E-09 |
| CNTNAP1  | -1.40975 | 3.432661 | 3.59E-11 | 3.39E-09 |
| F2RL2    | 2.176362 | 0.980367 | 3.65E-11 | 3.44E-09 |
| PTGS1    | -2.87233 | 0.113944 | 5.25E-11 | 4.93E-09 |
| ATF3     | 2.289178 | 4.411857 | 5.52E-11 | 5.17E-09 |
| ARL14    | 1.744391 | 1.92286  | 5.80E-11 | 5.37E-09 |
| HOXA2    | 2.46354  | 0.832256 | 6.21E-11 | 5.72E-09 |
| IRF4     | 7.782359 | -1.92785 | 6.30E-11 | 5.78E-09 |
| AC099489 | 4.024466 | -1.30973 | 6.53E-11 | 5.98E-09 |
| NPIP5    | 1.719541 | 5.195861 | 7.77E-11 | 7.08E-09 |
| RPPH1    | 3.299078 | 1.039592 | 1.01E-10 | 9.02E-09 |
| AQP4     | -2.40768 | 0.207096 | 1.08E-10 | 9.56E-09 |
| SMG1P1   | 1.152706 | 4.799    | 1.11E-10 | 9.82E-09 |
| GATA2    | 1.145154 | 4.229953 | 1.14E-10 | 9.95E-09 |
| STARD8   | -1.42886 | 3.212298 | 1.15E-10 | 9.98E-09 |
| PCK1     | -1.53374 | 3.929693 | 1.15E-10 | 9.98E-09 |
| DEPP1    | -1.70995 | 2.650504 | 1.18E-10 | 1.02E-08 |
| SPRR2D   | 7.486671 | -2.17947 | 1.24E-10 | 1.07E-08 |
| ABCA7    | -1.0512  | 4.877715 | 1.31E-10 | 1.11E-08 |
| LGI4     | -2.71255 | 0.976588 | 1.34E-10 | 1.13E-08 |
| MELTF    | -1.06651 | 4.635268 | 1.36E-10 | 1.15E-08 |
| TTLL6    | -1.26894 | 3.944528 | 1.51E-10 | 1.26E-08 |
| ASIC1    | -1.44542 | 3.148919 | 1.63E-10 | 1.36E-08 |
| GPT2     | -1.14571 | 5.655779 | 1.68E-10 | 1.39E-08 |
| CCDC154  | 7.879852 | -1.84633 | 1.91E-10 | 1.58E-08 |
| SNX19    | 2.40944  | 0.779402 | 2.05E-10 | 1.68E-08 |
| AC113194 | 7.539664 | -2.13698 | 2.05E-10 | 1.68E-08 |
| ACBD4    | -1.07912 | 4.653311 | 2.15E-10 | 1.75E-08 |
| UGT2B10  | 1.648498 | 2.016325 | 2.27E-10 | 1.84E-08 |
| AC006111 | 2.831597 | -0.41267 | 2.29E-10 | 1.85E-08 |
| ZNF671   | 1.457573 | 2.814655 | 2.44E-10 | 1.96E-08 |
| SLC22A1  | 4.964211 | -1.53814 | 2.54E-10 | 2.03E-08 |
| SMIM14   | -1.34578 | 3.7464   | 2.61E-10 | 2.08E-08 |
| SLC2A10  | -7.46223 | -2.25898 | 2.82E-10 | 2.23E-08 |
| SLC16A5  | -1.20742 | 4.452266 | 2.99E-10 | 2.36E-08 |
| VGF      | 2.070708 | 1.521956 | 3.02E-10 | 2.37E-08 |
| FOXD4L6  | 7.403664 | -2.25302 | 3.06E-10 | 2.40E-08 |
| TMEM214  | -1.0013  | 7.026562 | 3.20E-10 | 2.50E-08 |

|           |          |          |          |          |
|-----------|----------|----------|----------|----------|
| PDE9A     | -1.28106 | 3.792475 | 3.41E-10 | 2.65E-08 |
| LBP       | -1.7553  | 2.021184 | 3.64E-10 | 2.80E-08 |
| ELMO3     | 1.727149 | 1.725236 | 3.89E-10 | 2.96E-08 |
| RNASE4    | -1.00714 | 4.960081 | 4.07E-10 | 3.09E-08 |
| DAO       | -1.85407 | 1.755644 | 4.63E-10 | 3.49E-08 |
| PAK6      | 7.417859 | -2.24054 | 4.91E-10 | 3.69E-08 |
| SDHAF4    | -1.67629 | 2.112341 | 5.10E-10 | 3.81E-08 |
| C5AR2     | -1.64975 | 2.308992 | 5.23E-10 | 3.90E-08 |
| DHRS2     | 1.796302 | 2.06871  | 6.42E-10 | 4.74E-08 |
| YIPF2     | -1.00882 | 4.628989 | 6.47E-10 | 4.75E-08 |
| ZNF416    | 1.356051 | 3.311187 | 6.86E-10 | 5.00E-08 |
| PDZD2     | 3.319796 | -0.06539 | 7.75E-10 | 5.62E-08 |
| H6PD      | -1.96309 | 5.825877 | 8.15E-10 | 5.89E-08 |
| SLC12A3   | -1.19121 | 3.865538 | 8.42E-10 | 6.05E-08 |
| RNF157    | -1.36312 | 3.754925 | 1.00E-09 | 7.04E-08 |
| CLDN6     | 3.43849  | -0.19548 | 1.02E-09 | 7.15E-08 |
| ATP2A3    | -1.35412 | 3.397781 | 1.03E-09 | 7.20E-08 |
| NACAD     | 4.919999 | -1.54908 | 1.09E-09 | 7.55E-08 |
| CCDC15-DT | 4.284081 | -1.01159 | 1.20E-09 | 8.34E-08 |
| SLC6A9    | -1.42296 | 2.914497 | 1.25E-09 | 8.63E-08 |
| FXYS5     | -1.06939 | 4.660204 | 1.26E-09 | 8.64E-08 |
| ARHGEF37  | -2.06995 | 0.672319 | 1.38E-09 | 9.39E-08 |
| CRYL1     | -1.30602 | 3.413332 | 1.39E-09 | 9.41E-08 |
| GDA       | -1.34731 | 4.589883 | 1.40E-09 | 9.45E-08 |
| RAB4B     | -1.13613 | 4.346282 | 1.50E-09 | 1.01E-07 |
| CD3EAP    | 1.779604 | 3.830035 | 1.56E-09 | 1.05E-07 |
| RASA4     | -1.31436 | 3.297617 | 1.66E-09 | 1.11E-07 |
| EHD2      | -1.22437 | 3.831645 | 1.72E-09 | 1.15E-07 |
| LRRC43    | 7.424881 | -2.24202 | 1.74E-09 | 1.15E-07 |
| CSF2RA    | -1.1099  | 4.08599  | 1.75E-09 | 1.15E-07 |
| SUMO4     | 7.472012 | -2.19673 | 1.80E-09 | 1.18E-07 |
| AC010378  | -1.5165  | 2.767249 | 1.81E-09 | 1.18E-07 |
| LINC02212 | -1.73187 | 1.937217 | 1.81E-09 | 1.18E-07 |
| NOC2LP2   | 1.57483  | 2.541607 | 1.90E-09 | 1.24E-07 |
| C2        | -1.67027 | 2.076443 | 1.96E-09 | 1.27E-07 |
| BNIP1     | 2.6744   | -0.6203  | 2.12E-09 | 1.37E-07 |
| MIP       | 7.501338 | -2.16697 | 2.16E-09 | 1.39E-07 |
| ERFE      | -1.95696 | 1.009234 | 2.27E-09 | 1.46E-07 |
| COL12A1   | 5.117856 | -1.38987 | 2.33E-09 | 1.49E-07 |
| SLC38A3   | -2.48369 | 0.875912 | 2.47E-09 | 1.57E-07 |
| DCAF4L1   | 2.143804 | 0.150817 | 2.51E-09 | 1.59E-07 |
| UGT1A1    | 1.091113 | 4.85047  | 2.56E-09 | 1.62E-07 |
| CIDEA     | -1.34999 | 2.970859 | 3.17E-09 | 1.97E-07 |
| CORO2A    | -1.0757  | 4.066211 | 3.31E-09 | 2.06E-07 |
| AC027373  | 3.753871 | -1.21742 | 3.56E-09 | 2.20E-07 |
| AL589993  | 7.340828 | -2.29571 | 3.63E-09 | 2.24E-07 |
| ESR1      | 7.305102 | -2.33658 | 3.93E-09 | 2.40E-07 |
| TNS2      | -1.08449 | 4.103628 | 4.02E-09 | 2.45E-07 |

|            |          |          |          |          |
|------------|----------|----------|----------|----------|
| C5AR1      | -2.87753 | 4.020007 | 4.12E-09 | 2.50E-07 |
| GNG4       | -1.04049 | 4.483377 | 4.59E-09 | 2.77E-07 |
| KRT18P4    | 2.533711 | -0.04213 | 4.82E-09 | 2.90E-07 |
| LINC02236  | 7.253071 | -2.37371 | 5.22E-09 | 3.12E-07 |
| PFKFB4     | -1.11053 | 4.034194 | 5.38E-09 | 3.20E-07 |
| SHISA9     | 7.637062 | -2.04399 | 5.71E-09 | 3.38E-07 |
| AL359844   | 7.273438 | -2.35785 | 5.77E-09 | 3.40E-07 |
| FBXW8      | -1.05311 | 4.335269 | 5.86E-09 | 3.45E-07 |
| SGK1       | 1.826675 | 1.493228 | 6.45E-09 | 3.76E-07 |
| ARC        | 7.440759 | -2.2238  | 6.60E-09 | 3.83E-07 |
| LINC02593  | 1.540925 | 1.892048 | 6.61E-09 | 3.83E-07 |
| AHNAK2     | -1.27206 | 3.747208 | 6.84E-09 | 3.95E-07 |
| FES        | 1.77554  | 1.648094 | 7.31E-09 | 4.19E-07 |
| SCAT8      | -1.1601  | 3.81151  | 7.78E-09 | 4.44E-07 |
| FMNL1      | -1.05613 | 4.085891 | 7.83E-09 | 4.46E-07 |
| ACE        | -1.4597  | 2.872816 | 8.67E-09 | 4.88E-07 |
| PPIEL      | 2.929122 | -0.2033  | 9.18E-09 | 5.14E-07 |
| GPR176-DT  | 2.529637 | 0.370802 | 9.55E-09 | 5.34E-07 |
| AC091230   | 7.496559 | -2.1639  | 9.89E-09 | 5.51E-07 |
| FAM131C    | -3.8417  | -0.29782 | 9.90E-09 | 5.51E-07 |
| DLGAP1     | -1.201   | 3.663472 | 1.04E-08 | 5.78E-07 |
| AC106886   | 3.000694 | 1.888646 | 1.18E-08 | 6.54E-07 |
| LINC02320  | -4.61072 | -1.12415 | 1.26E-08 | 6.92E-07 |
| ADSS1      | -1.58559 | 1.745932 | 1.28E-08 | 7.00E-07 |
| FAM171A1   | 7.202312 | -2.4106  | 1.29E-08 | 7.01E-07 |
| MUC5B      | -2.38023 | -0.38966 | 1.30E-08 | 7.09E-07 |
| RNF14P3    | 3.885297 | -1.20996 | 1.38E-08 | 7.51E-07 |
| LINC02404  | -1.29662 | 2.8579   | 1.41E-08 | 7.62E-07 |
| RNVU1-7    | 4.041654 | -1.48883 | 1.41E-08 | 7.62E-07 |
| TRMT112P6  | 8.901076 | -0.92802 | 1.48E-08 | 7.95E-07 |
| TYRO3P     | 3.934643 | -1.16265 | 1.49E-08 | 7.96E-07 |
| EPHX3      | 2.036501 | 0.770187 | 1.50E-08 | 8.02E-07 |
| ACTG1P3    | 3.5721   | -1.49379 | 1.53E-08 | 8.14E-07 |
| NKILA      | 7.414372 | -2.24782 | 1.64E-08 | 8.61E-07 |
| CCT6P3     | 1.305159 | 2.921166 | 1.64E-08 | 8.61E-07 |
| KANK3      | -2.11767 | 0.560799 | 1.66E-08 | 8.70E-07 |
| PIGZ       | -1.98299 | 1.523899 | 1.77E-08 | 9.22E-07 |
| ZNF710-AS1 | -1.47148 | 2.254441 | 1.77E-08 | 9.23E-07 |
| CHAC1      | -1.4658  | 6.053819 | 1.98E-08 | 1.03E-06 |
| ADM2       | -1.61763 | 3.768887 | 1.99E-08 | 1.03E-06 |
| AC012447   | 2.484987 | 0.177806 | 2.02E-08 | 1.04E-06 |
| AGAP2      | -1.65448 | 1.547503 | 2.10E-08 | 1.08E-06 |
| KRT81      | -1.69918 | 2.060871 | 2.11E-08 | 1.08E-06 |
| DEPTOR     | -1.22501 | 3.252467 | 2.22E-08 | 1.13E-06 |
| CGREF1     | -1.33759 | 2.929836 | 2.30E-08 | 1.15E-06 |
| C6orf141   | -1.73155 | 1.095649 | 2.38E-08 | 1.19E-06 |
| CEL        | 3.483682 | -1.08126 | 2.48E-08 | 1.24E-06 |
| EVL        | -1.1444  | 4.016602 | 2.68E-08 | 1.33E-06 |



|           |          |          |          |          |
|-----------|----------|----------|----------|----------|
| LDHD      | -1.95747 | 0.567004 | 2.73E-08 | 1.35E-06 |
| KRT8P39   | 3.440474 | -0.90039 | 2.78E-08 | 1.37E-06 |
| VCAM1     | 1.254983 | 3.435427 | 2.91E-08 | 1.43E-06 |
| NR0B1     | 3.556527 | 0.201356 | 2.92E-08 | 1.43E-06 |
| LINC00957 | -1.65635 | 1.316452 | 2.94E-08 | 1.44E-06 |
| TRPV2     | -2.07466 | 0.091127 | 3.01E-08 | 1.47E-06 |
| MYLK2     | 2.569222 | -0.4445  | 3.08E-08 | 1.50E-06 |
| RUFY1-AS1 | 4.567269 | -1.86062 | 3.22E-08 | 1.56E-06 |
| TCEA1     | -1.0321  | 6.257413 | 3.25E-08 | 1.57E-06 |
| MEIS3     | -1.24874 | 3.661798 | 3.35E-08 | 1.61E-06 |
| 5_8S_rRNA | 2.94516  | -1.32938 | 3.36E-08 | 1.61E-06 |
| KRT7-AS   | 3.870152 | -1.33813 | 3.36E-08 | 1.61E-06 |
| LOX       | -2.00551 | 0.119833 | 3.52E-08 | 1.69E-06 |
| AP001053  | 5.027092 | -2.21504 | 3.65E-08 | 1.73E-06 |
| C11orf49  | -1.01283 | 4.602786 | 3.81E-08 | 1.80E-06 |
| FBXL16    | -1.72382 | 1.504773 | 4.18E-08 | 1.96E-06 |
| MORC2-AS1 | 9.85705  | -0.00359 | 4.37E-08 | 2.04E-06 |
| ANKRD18DP | 7.267901 | -2.36633 | 4.37E-08 | 2.04E-06 |
| TOMM6     | 4.390477 | 5.685201 | 4.69E-08 | 2.17E-06 |
| EPPK1     | 2.067966 | -0.05136 | 4.82E-08 | 2.23E-06 |
| TRIP6     | 2.143778 | -0.11955 | 5.34E-08 | 2.44E-06 |
| FUT3      | -2.2972  | 0.138878 | 5.43E-08 | 2.48E-06 |
| ZNF667    | 2.715758 | -0.50628 | 5.62E-08 | 2.56E-06 |
| LINC02728 | 4.579862 | -1.83978 | 5.67E-08 | 2.58E-06 |
| PRKCG     | -1.37332 | 2.554826 | 5.69E-08 | 2.58E-06 |
| GPR35     | -1.1606  | 3.512438 | 6.01E-08 | 2.71E-06 |
| SNORD3A   | 1.736852 | 1.479927 | 6.22E-08 | 2.81E-06 |
| CLDN11    | 4.041415 | -0.97016 | 6.31E-08 | 2.83E-06 |
| INSM2     | 4.63659  | -1.78753 | 6.31E-08 | 2.83E-06 |
| OPRL1     | -2.7547  | -0.01926 | 6.37E-08 | 2.86E-06 |
| TLE2      | -1.3667  | 2.796837 | 6.56E-08 | 2.93E-06 |
| LTK       | 7.223788 | -2.39447 | 6.62E-08 | 2.96E-06 |
| LGR4      | -1.32827 | 7.306512 | 6.95E-08 | 3.09E-06 |
| GYS2      | -4.41307 | -0.01203 | 7.04E-08 | 3.11E-06 |
| TEF       | 1.242958 | 2.825588 | 7.72E-08 | 3.37E-06 |
| CCK       | 1.075998 | 3.835193 | 7.79E-08 | 3.39E-06 |
| TAT       | -1.29928 | 3.138036 | 7.80E-08 | 3.39E-06 |
| COL6A2    | -1.45737 | 2.116086 | 7.80E-08 | 3.39E-06 |
| NCF2      | 6.986082 | -2.58635 | 8.12E-08 | 3.51E-06 |
| KRT80     | 2.019878 | 0.455621 | 8.30E-08 | 3.57E-06 |
| HEY1      | 1.695411 | 0.894978 | 8.36E-08 | 3.59E-06 |
| CLYBL     | -1.15689 | 3.59865  | 8.56E-08 | 3.65E-06 |
| PIP5KL1   | -2.1109  | 0.313606 | 8.60E-08 | 3.67E-06 |
| WNK4      | -1.09094 | 3.600769 | 8.88E-08 | 3.77E-06 |
| ULBP1     | -1.33126 | 2.79744  | 8.89E-08 | 3.77E-06 |
| LINC00552 | 4.612039 | -0.97058 | 9.11E-08 | 3.86E-06 |
| B4GALNT2  | -1.033   | 4.212107 | 9.79E-08 | 4.12E-06 |
| MORN4     | -1.21655 | 2.984893 | 1.03E-07 | 4.31E-06 |

|              |          |          |          |          |
|--------------|----------|----------|----------|----------|
| DRG1P1       | 3.105711 | -0.56637 | 1.05E-07 | 4.38E-06 |
| SHANK2       | -1.39818 | 5.333429 | 1.06E-07 | 4.41E-06 |
| NUP210L      | 5.075037 | -2.18214 | 1.07E-07 | 4.47E-06 |
| SULT1B1      | -1.81063 | 0.531882 | 1.08E-07 | 4.51E-06 |
| FRG2C        | 4.622192 | -1.80841 | 1.16E-07 | 4.77E-06 |
| NPIP3        | 1.153838 | 3.4818   | 1.17E-07 | 4.81E-06 |
| P3H3         | -1.7222  | 1.105977 | 1.19E-07 | 4.86E-06 |
| IMPDH1P5     | 3.078226 | -1.41392 | 1.24E-07 | 5.07E-06 |
| AC026691     | 7.572458 | -2.08209 | 1.24E-07 | 5.07E-06 |
| C11orf96     | 2.267116 | -0.28971 | 1.35E-07 | 5.48E-06 |
| FAM20A       | -1.47419 | 2.357162 | 1.36E-07 | 5.48E-06 |
| TIMP3        | -1.39508 | 2.107323 | 1.42E-07 | 5.68E-06 |
| ERVK9-11     | 1.276427 | 2.55431  | 1.49E-07 | 5.93E-06 |
| TBC1D8B      | -1.03701 | 5.016041 | 1.49E-07 | 5.94E-06 |
| NPIP3        | 1.642694 | 1.197602 | 1.51E-07 | 6.00E-06 |
| ENO3         | 1.015686 | 3.799234 | 1.67E-07 | 6.60E-06 |
| NGEF         | -1.07067 | 3.858124 | 1.67E-07 | 6.60E-06 |
| MYH3         | 1.640855 | 0.879837 | 1.71E-07 | 6.71E-06 |
| AC010536     | 2.597249 | -0.84506 | 1.75E-07 | 6.85E-06 |
| CACNG6       | -1.13977 | 4.116635 | 1.76E-07 | 6.89E-06 |
| C2orf81      | -1.74425 | 1.105546 | 2.07E-07 | 8.07E-06 |
| FAM234A      | -1.02233 | 4.883942 | 2.13E-07 | 8.29E-06 |
| TMEM150B     | -1.31504 | 2.114094 | 2.16E-07 | 8.39E-06 |
| MIR1244-1    | 8.972974 | 2.302441 | 2.21E-07 | 8.53E-06 |
| PPP1R14A     | -1.17638 | 3.351357 | 2.40E-07 | 9.19E-06 |
| KCNMB4       | -1.31214 | 2.545224 | 2.42E-07 | 9.26E-06 |
| SARM1        | 1.042971 | 6.191165 | 2.55E-07 | 9.69E-06 |
| MIR181A1HG   | 6.874584 | -2.67461 | 2.70E-07 | 1.02E-05 |
| PHF24        | 4.477342 | -1.9523  | 2.71E-07 | 1.02E-05 |
| HLA-DOA      | -2.16948 | -0.15406 | 2.73E-07 | 1.03E-05 |
| NDUFA9P1     | 7.042222 | -2.5458  | 2.73E-07 | 1.03E-05 |
| FXVD6        | -1.29854 | 1.932095 | 2.78E-07 | 1.04E-05 |
| COL6A1       | -1.04879 | 3.72753  | 2.89E-07 | 1.08E-05 |
| EYS          | -1.2538  | 2.669473 | 3.03E-07 | 1.13E-05 |
| SLC1A2       | -1.53964 | 1.557652 | 3.09E-07 | 1.14E-05 |
| SNORD3B-2    | 3.299359 | -1.25515 | 3.10E-07 | 1.15E-05 |
| JAK3         | -1.70731 | 1.967339 | 3.11E-07 | 1.15E-05 |
| KLF15        | -1.22773 | 2.925574 | 3.42E-07 | 1.25E-05 |
| Z93241       | 3.862669 | -1.80038 | 3.50E-07 | 1.27E-05 |
| MYRF-AS1     | -6.948   | -2.68607 | 3.50E-07 | 1.27E-05 |
| MALAT1       | -1.0212  | 6.636995 | 3.52E-07 | 1.27E-05 |
| GPR75        | 1.704851 | 0.972052 | 3.53E-07 | 1.28E-05 |
| NPHP3-ACAD11 | -9.30322 | -0.55489 | 3.61E-07 | 1.30E-05 |
| HMGB1P5      | 1.130087 | 5.623426 | 3.71E-07 | 1.33E-05 |
| GPR137B      | -1.00705 | 3.848287 | 3.77E-07 | 1.35E-05 |
| CHRNA2       | 1.947271 | 0.02645  | 3.99E-07 | 1.42E-05 |
| SVEP1        | 6.944926 | -2.62007 | 4.04E-07 | 1.43E-05 |
| C3orf35      | 2.083285 | 0.018218 | 4.19E-07 | 1.48E-05 |

|             |          |          |          |          |
|-------------|----------|----------|----------|----------|
| JDP2        | -1.76473 | 3.837656 | 4.29E-07 | 1.51E-05 |
| KAZN        | -2.2485  | 1.401927 | 4.34E-07 | 1.52E-05 |
| AASS        | -1.24298 | 3.632402 | 4.53E-07 | 1.58E-05 |
| CDH23       | -1.10644 | 3.17496  | 4.63E-07 | 1.61E-05 |
| PLB1        | 2.184227 | -0.35166 | 4.81E-07 | 1.66E-05 |
| VSTM1       | 6.79412  | -2.74276 | 5.03E-07 | 1.73E-05 |
| SH2D1B      | -2.07139 | 0.7562   | 5.59E-07 | 1.89E-05 |
| SLCO2B1     | -1.01529 | 5.448382 | 5.64E-07 | 1.90E-05 |
| TP53TG3E    | -8.23368 | -1.58352 | 5.66E-07 | 1.91E-05 |
| KLF4        | 1.368035 | 3.953739 | 5.86E-07 | 1.97E-05 |
| ICAM5       | -1.29185 | 2.219067 | 5.93E-07 | 1.99E-05 |
| AL442063    | 6.819151 | -2.72378 | 6.17E-07 | 2.06E-05 |
| KRT18P37    | 4.754662 | -2.02349 | 6.23E-07 | 2.08E-05 |
| AC006372    | 5.389181 | -2.54095 | 6.51E-07 | 2.17E-05 |
| ENTPD2      | -1.92281 | 0.268748 | 6.60E-07 | 2.19E-05 |
| FJX1        | 2.140469 | -0.57206 | 6.83E-07 | 2.26E-05 |
| SLC44A3-AS1 | -1.2425  | 2.199946 | 6.96E-07 | 2.30E-05 |
| HK2         | -1.35428 | 1.585054 | 7.02E-07 | 2.31E-05 |
| VSTM5       | 3.666364 | -0.9204  | 7.22E-07 | 2.36E-05 |
| AP001425    | -2.21684 | 0.194086 | 7.37E-07 | 2.40E-05 |
| SAMD11      | 1.342147 | 3.125682 | 7.41E-07 | 2.40E-05 |
| LINC02803   | 6.970986 | -2.60006 | 7.51E-07 | 2.43E-05 |
| ART4        | 2.156108 | -0.55749 | 7.55E-07 | 2.44E-05 |
| RIMS3       | -1.0885  | 3.462361 | 7.57E-07 | 2.45E-05 |
| BRSK1       | -1.23672 | 2.27126  | 7.75E-07 | 2.50E-05 |
| LINC00334   | 6.991854 | -2.59107 | 7.99E-07 | 2.57E-05 |
| AP000757    | -1.3449  | 1.461314 | 8.06E-07 | 2.59E-05 |
| H4C5        | 2.511223 | -0.47698 | 8.28E-07 | 2.64E-05 |
| OPN3        | -1.37387 | 2.610972 | 8.58E-07 | 2.72E-05 |
| SBK1        | -1.46874 | 1.378387 | 8.89E-07 | 2.81E-05 |
| HSPE1-MOB4  | -11.2767 | 1.362848 | 9.08E-07 | 2.86E-05 |
| TRAPPC6A    | -1.05514 | 3.384276 | 9.40E-07 | 2.94E-05 |
| ACTA1       | 6.853013 | -2.69163 | 9.41E-07 | 2.94E-05 |
| DLX3        | 4.43282  | -1.96781 | 9.54E-07 | 2.98E-05 |
| CREB3L1     | -1.70213 | 1.645596 | 9.63E-07 | 3.00E-05 |
| ACVRL1      | -1.65836 | 1.017393 | 9.98E-07 | 3.10E-05 |
| RSPH6A      | 6.773228 | -2.75141 | 1.02E-06 | 3.17E-05 |
| CD300A      | 7.038006 | -2.5475  | 1.04E-06 | 3.22E-05 |
| BZW1P2      | 1.302004 | 1.836618 | 1.04E-06 | 3.23E-05 |
| ST3GAL1     | -1.06911 | 3.380667 | 1.05E-06 | 3.24E-05 |
| FZD2        | -1.04666 | 3.45452  | 1.05E-06 | 3.24E-05 |
| CLDN7       | -1.22851 | 2.843652 | 1.07E-06 | 3.30E-05 |
| RAPGEF4     | -1.17352 | 2.567489 | 1.10E-06 | 3.39E-05 |
| SMG1P4      | 1.683641 | 1.208975 | 1.12E-06 | 3.44E-05 |
| CCDC17      | 1.680974 | 0.69478  | 1.16E-06 | 3.55E-05 |
| AC079601    | 6.759501 | -2.76612 | 1.22E-06 | 3.71E-05 |
| GRM2        | 6.745653 | -2.78118 | 1.22E-06 | 3.71E-05 |
| CUZD1       | 4.221356 | 0.560837 | 1.22E-06 | 3.72E-05 |

|           |          |          |          |          |
|-----------|----------|----------|----------|----------|
| AC090192  | 1.889709 | 0.191608 | 1.23E-06 | 3.74E-05 |
| LINC00858 | -4.89906 | -2.50025 | 1.27E-06 | 3.82E-05 |
| DSCR10    | -1.63533 | 0.386926 | 1.28E-06 | 3.86E-05 |
| AL645728  | 2.557192 | -0.78986 | 1.29E-06 | 3.89E-05 |
| LY96      | -3.05507 | -0.47343 | 1.31E-06 | 3.94E-05 |
| SH3BP2    | -1.95797 | 2.010328 | 1.44E-06 | 4.29E-05 |
| C3P1      | -1.25353 | 2.564994 | 1.44E-06 | 4.29E-05 |
| BICD1P1   | 7.042321 | -2.5381  | 1.46E-06 | 4.34E-05 |
| ASS1P5    | 4.215705 | -2.13833 | 1.48E-06 | 4.39E-05 |
| PLAT      | -1.70876 | 0.073039 | 1.49E-06 | 4.41E-05 |
| BAIAP3    | -1.21416 | 3.204742 | 1.55E-06 | 4.57E-05 |
| MAGED4B   | -1.25039 | 2.384522 | 1.57E-06 | 4.60E-05 |
| RPH3AL    | -1.0338  | 3.965362 | 1.58E-06 | 4.64E-05 |
| TUSC8     | 3.624391 | -1.25485 | 1.59E-06 | 4.65E-05 |
| ARMH1     | -2.01732 | -0.1674  | 1.61E-06 | 4.71E-05 |
| SMG1P2    | 1.124824 | 3.176494 | 1.62E-06 | 4.71E-05 |
| ZMYND15   | -1.18446 | 2.847136 | 1.63E-06 | 4.73E-05 |
| AL590763  | 4.62817  | -2.30591 | 1.63E-06 | 4.73E-05 |
| ITGA3     | -1.03008 | 4.110153 | 1.64E-06 | 4.76E-05 |
| LINC01669 | -3.96906 | 0.911224 | 1.69E-06 | 4.88E-05 |
| AL049836  | -2.74913 | -1.39044 | 1.69E-06 | 4.88E-05 |
| RTEL1P1   | 6.770634 | -2.77137 | 1.69E-06 | 4.88E-05 |
| IL21R     | -3.45562 | -0.46416 | 1.69E-06 | 4.88E-05 |
| AL031710  | 4.693713 | -2.49094 | 1.75E-06 | 5.02E-05 |
| ASPG      | -2.93865 | -1.30005 | 1.76E-06 | 5.04E-05 |
| TMEM91    | -1.80202 | 0.353248 | 1.77E-06 | 5.07E-05 |
| BPIFB9P   | 6.807551 | -2.73779 | 1.91E-06 | 5.44E-05 |
| PAX8      | -1.31852 | 1.521835 | 1.92E-06 | 5.47E-05 |
| FAM117A   | -1.02649 | 3.452121 | 2.00E-06 | 5.66E-05 |
| ITGA10    | -1.18293 | 2.662897 | 2.05E-06 | 5.77E-05 |
| LIMD2     | -1.13517 | 2.765103 | 2.06E-06 | 5.80E-05 |
| ALDH6A1   | -1.05706 | 3.151848 | 2.08E-06 | 5.86E-05 |
| HNF4A-AS1 | -6.64949 | -2.92126 | 2.09E-06 | 5.86E-05 |
| AL034417  | 2.300446 | -0.90555 | 2.10E-06 | 5.89E-05 |
| AL162741  | 2.608375 | -1.32946 | 2.15E-06 | 6.04E-05 |
| PARVB     | -1.08753 | 3.24065  | 2.17E-06 | 6.07E-05 |
| KRT8P15   | 6.714644 | -2.81271 | 2.19E-06 | 6.12E-05 |
| LINC01963 | 1.300703 | 2.036833 | 2.40E-06 | 6.61E-05 |
| AC091806  | -1.00394 | 3.712181 | 2.42E-06 | 6.66E-05 |
| FAM13A    | -1.04536 | 3.813517 | 2.42E-06 | 6.66E-05 |
| AC119673  | 3.785035 | -2.04853 | 2.44E-06 | 6.70E-05 |
| CYS1      | -1.93429 | 0.779152 | 2.45E-06 | 6.73E-05 |
| RIMBP3B   | -7.71626 | -2.03892 | 2.55E-06 | 6.98E-05 |
| FRG2EP    | 6.733176 | -2.80583 | 2.62E-06 | 7.16E-05 |
| KRT17     | 2.960304 | -1.42982 | 2.66E-06 | 7.26E-05 |
| SYT7      | -1.24324 | 2.050117 | 2.75E-06 | 7.47E-05 |
| LCT       | 4.365822 | -2.02724 | 2.88E-06 | 7.82E-05 |
| THSD4     | 1.259447 | 1.753733 | 2.89E-06 | 7.85E-05 |

|             |          |          |          |          |
|-------------|----------|----------|----------|----------|
| ALOXE3      | 1.768246 | 1.037333 | 2.91E-06 | 7.87E-05 |
| MAGED4      | -1.4085  | 2.302153 | 2.92E-06 | 7.90E-05 |
| FGF8        | 6.660647 | -2.85424 | 2.95E-06 | 7.95E-05 |
| AC073288    | 6.735905 | -2.77537 | 2.97E-06 | 8.00E-05 |
| KRT18P5     | 2.818094 | -1.28612 | 2.98E-06 | 8.03E-05 |
| SV2A        | 1.507558 | 1.086435 | 3.08E-06 | 8.27E-05 |
| AC124276    | 6.662223 | -2.85359 | 3.09E-06 | 8.29E-05 |
| DQX1        | -1.12547 | 2.745065 | 3.20E-06 | 8.55E-05 |
| SLC6A3      | 6.592142 | -2.89104 | 3.22E-06 | 8.58E-05 |
| ALPK3       | 1.823896 | 0.172831 | 3.40E-06 | 9.03E-05 |
| PKD1L2      | -1.335   | 1.355387 | 3.40E-06 | 9.04E-05 |
| LY6G6C      | 6.693678 | -2.81105 | 3.66E-06 | 9.68E-05 |
| H2AC12      | 2.242847 | -0.93105 | 3.69E-06 | 9.75E-05 |
| ERFL        | -1.59539 | 0.066552 | 3.75E-06 | 9.89E-05 |
| ABCA3       | -1.04973 | 3.449392 | 3.78E-06 | 9.95E-05 |
| CYP4F26P    | 1.010038 | 3.342917 | 3.85E-06 | 0.000101 |
| ZNF229      | 1.29029  | 1.965786 | 3.88E-06 | 0.000102 |
| SEMA6B      | -1.05858 | 3.119834 | 3.89E-06 | 0.000102 |
| SLC1A7      | -4.28431 | -2.03815 | 3.89E-06 | 0.000102 |
| ROCK1P1     | 1.07304  | 3.171781 | 3.93E-06 | 0.000103 |
| RBPMS2      | -1.01235 | 3.499576 | 4.04E-06 | 0.000105 |
| REM2        | 6.711811 | -2.81381 | 4.20E-06 | 0.000109 |
| TRANK1      | -1.30749 | 1.894153 | 4.34E-06 | 0.000112 |
| ZDHHC8      | -1.07935 | 2.913017 | 4.60E-06 | 0.000119 |
| PLCD1       | -1.05893 | 3.283662 | 4.60E-06 | 0.000119 |
| H4C2        | 4.838269 | -2.34614 | 4.63E-06 | 0.000119 |
| SAMD12      | -1.32854 | 2.640338 | 4.87E-06 | 0.000125 |
| AKNA        | -1.12554 | 3.259931 | 4.88E-06 | 0.000125 |
| LINC00239   | -1.37496 | 1.556462 | 5.05E-06 | 0.000129 |
| S100A2      | 1.575615 | 0.331654 | 5.14E-06 | 0.000131 |
| TTC25       | -1.55946 | 0.884141 | 5.14E-06 | 0.000131 |
| SLC26A4-AS1 | 6.581032 | -2.91662 | 5.26E-06 | 0.000134 |
| SNAPC4      | 1.050112 | 3.382165 | 5.34E-06 | 0.000135 |
| FLJ31104    | 1.94183  | -0.6404  | 5.41E-06 | 0.000137 |
| CSF3R       | -2.72249 | -1.03891 | 5.52E-06 | 0.000139 |
| EIF4BP2     | 2.940381 | -1.69738 | 5.65E-06 | 0.000142 |
| AC004585    | -6.57221 | -2.98042 | 5.83E-06 | 0.000147 |
| CPLX2       | 2.577966 | 0.721368 | 5.84E-06 | 0.000147 |
| C3orf18     | -1.0194  | 3.320885 | 5.94E-06 | 0.000149 |
| ZSWIM4      | -1.31414 | 1.606022 | 6.17E-06 | 0.000154 |
| AC040173    | 6.664962 | -2.83196 | 6.18E-06 | 0.000154 |
| TMEM8B      | -1.10518 | 2.563596 | 6.32E-06 | 0.000157 |
| LIMD1-AS1   | -2.67552 | 1.745948 | 6.66E-06 | 0.000165 |
| PTENP1      | 2.252511 | -0.01671 | 6.72E-06 | 0.000166 |
| PRODH       | -1.25492 | 1.771579 | 6.82E-06 | 0.000168 |
| AHRR        | 2.686384 | -1.64953 | 6.86E-06 | 0.000169 |
| AC026954    | 6.773316 | -0.49133 | 7.03E-06 | 0.000172 |
| MARCHF3     | -1.07302 | 2.751755 | 7.34E-06 | 0.000179 |

|             |          |          |          |          |
|-------------|----------|----------|----------|----------|
| PRSS22      | -2.35982 | 0.241935 | 7.37E-06 | 0.000179 |
| HPSE2       | 7.079503 | -2.54631 | 7.37E-06 | 0.000179 |
| AC073130    | 3.152632 | -2.15351 | 7.48E-06 | 0.000181 |
| KCNN1       | -1.27612 | 1.923654 | 7.64E-06 | 0.000185 |
| ABCG4       | -1.5602  | 1.028953 | 7.67E-06 | 0.000185 |
| SPIB        | 4.127904 | -2.21129 | 7.73E-06 | 0.000186 |
| AC008074    | 2.377983 | -1.46366 | 7.73E-06 | 0.000186 |
| AC105942    | -1.06999 | 2.826396 | 7.76E-06 | 0.000187 |
| RRH         | 6.536128 | -2.93348 | 7.78E-06 | 0.000187 |
| ADRB2       | 4.138605 | -2.20054 | 8.34E-06 | 0.000199 |
| LDHBP1      | 6.400944 | -3.04038 | 8.40E-06 | 0.0002   |
| ALPK1       | -1.06866 | 3.588826 | 8.54E-06 | 0.000202 |
| LAT         | 1.503871 | 0.431813 | 8.80E-06 | 0.000207 |
| HOXD9       | 2.695111 | -1.06718 | 9.02E-06 | 0.000212 |
| ZDHHC11B    | 1.097618 | 2.753365 | 9.06E-06 | 0.000212 |
| GNG7        | -1.58818 | 0.564066 | 9.36E-06 | 0.000218 |
| LRRC3       | -1.26891 | 1.788379 | 9.50E-06 | 0.000221 |
| RBM23       | 2.173763 | -0.12091 | 9.57E-06 | 0.000222 |
| AC078983    | 6.646499 | -2.83887 | 9.87E-06 | 0.000228 |
| AC023157    | 1.431202 | 1.10848  | 9.89E-06 | 0.000228 |
| PCDH9       | 1.673012 | 4.24918  | 1.02E-05 | 0.000235 |
| CCDC136     | -1.68373 | 0.212004 | 1.05E-05 | 0.00024  |
| IGF2BP2-AS1 | 6.592866 | -2.87986 | 1.07E-05 | 0.000243 |
| OSCAR       | -2.9986  | -0.33583 | 1.09E-05 | 0.000246 |
| CELF6       | 7.425476 | -2.22001 | 1.20E-05 | 0.000269 |
| FOXD4L3     | 6.691609 | -2.83265 | 1.20E-05 | 0.000269 |
| CAPN8       | -1.08363 | 2.681795 | 1.20E-05 | 0.000269 |
| SYT11       | -1.17457 | 2.074578 | 1.20E-05 | 0.000269 |
| TBC1D5      | -1.03188 | 4.718472 | 1.20E-05 | 0.000269 |
| GDPD2       | 6.598109 | -2.89936 | 1.25E-05 | 0.000277 |
| H1-4        | 1.987915 | -0.87873 | 1.27E-05 | 0.00028  |
| RND3        | 1.320725 | 1.564153 | 1.27E-05 | 0.000281 |
| H4C11       | 1.377464 | 1.404556 | 1.28E-05 | 0.000282 |
| TMEM106A    | 2.933489 | -1.69643 | 1.28E-05 | 0.000282 |
| ACBD7       | -1.10253 | 2.350079 | 1.28E-05 | 0.000283 |
| PART1       | -1.38231 | 0.960523 | 1.32E-05 | 0.000291 |
| PCAT6       | -1.31453 | 1.598745 | 1.33E-05 | 0.000292 |
| AC092868    | -1.3288  | 0.874026 | 1.33E-05 | 0.000292 |
| MAFB        | 3.44831  | -1.14073 | 1.33E-05 | 0.000292 |
| GFY         | -1.21868 | 1.711684 | 1.34E-05 | 0.000292 |
| PALM        | -1.11269 | 3.424051 | 1.34E-05 | 0.000293 |
| TRIM67      | 2.057404 | -0.34287 | 1.34E-05 | 0.000293 |
| KRT8P36     | 2.511736 | -1.51853 | 1.36E-05 | 0.000296 |
| SLFN14      | 6.382537 | -3.04684 | 1.40E-05 | 0.000303 |
| MAGEA2B     | 1.129645 | 4.475326 | 1.41E-05 | 0.000305 |
| NRCAM       | 1.007815 | 3.060353 | 1.42E-05 | 0.000307 |
| SLC29A4     | -1.15839 | 3.712387 | 1.44E-05 | 0.00031  |
| MAP3K14-AS1 | -1.30243 | 2.011342 | 1.45E-05 | 0.000313 |

|            |          |          |          |          |
|------------|----------|----------|----------|----------|
| JCADP1     | 6.4006   | -3.04074 | 1.45E-05 | 0.000313 |
| EFHD1      | -1.42413 | 0.448433 | 1.47E-05 | 0.000315 |
| CCNJL      | -1.39556 | 5.625615 | 1.48E-05 | 0.000317 |
| TBR1       | 6.872973 | -2.66572 | 1.53E-05 | 0.000327 |
| GAS6       | 1.766845 | 0.183479 | 1.54E-05 | 0.000328 |
| RNVU1-31   | 6.354665 | -3.06891 | 1.54E-05 | 0.000329 |
| AL358473   | -3.253   | -1.58412 | 1.54E-05 | 0.000329 |
| VTRNA1-3   | 4.185203 | -2.18034 | 1.57E-05 | 0.000333 |
| KLC3       | -1.18863 | 1.635381 | 1.60E-05 | 0.000337 |
| CDKN1C     | 4.180542 | -2.20157 | 1.62E-05 | 0.000341 |
| PCDH10     | 4.457376 | -2.30139 | 1.64E-05 | 0.000344 |
| CRYM       | -1.14746 | 2.018145 | 1.66E-05 | 0.000347 |
| CERNA1     | -1.54577 | 0.328863 | 1.67E-05 | 0.000348 |
| SERINC4    | 3.425328 | -1.74103 | 1.70E-05 | 0.000354 |
| AC022210   | -1.4389  | 0.995001 | 1.70E-05 | 0.000354 |
| ZNF296     | 1.037867 | 2.525323 | 1.72E-05 | 0.000357 |
| TAC1       | 6.619791 | -2.85907 | 1.73E-05 | 0.00036  |
| ADAM20P1   | 4.181006 | -2.17913 | 1.73E-05 | 0.00036  |
| ZNF556     | 6.497182 | -2.95851 | 1.75E-05 | 0.000362 |
| CHD5       | 2.142904 | -0.85013 | 1.75E-05 | 0.000363 |
| AC074212   | -1.85025 | 0.66533  | 1.76E-05 | 0.000364 |
| UCN2       | 3.324335 | -1.20843 | 1.76E-05 | 0.000365 |
| PAX2       | 6.552867 | -2.91627 | 1.78E-05 | 0.000366 |
| ST14       | 1.573898 | 0.710688 | 1.80E-05 | 0.000371 |
| ARHGEF4    | -1.22721 | 1.185977 | 1.81E-05 | 0.000373 |
| NR1D1      | 1.08636  | 3.062028 | 1.83E-05 | 0.000375 |
| RPL36AP21  | 6.597268 | -2.88854 | 1.84E-05 | 0.000376 |
| MIA-RAB4B  | 4.108343 | 0.642758 | 1.84E-05 | 0.000376 |
| AC108690   | -1.66623 | 0.65349  | 1.84E-05 | 0.000376 |
| CDK5R1     | 1.282847 | 1.985785 | 1.86E-05 | 0.000379 |
| GPR84      | 6.498166 | -2.97008 | 1.86E-05 | 0.000379 |
| AC109326   | 2.393468 | -1.15405 | 1.88E-05 | 0.000383 |
| EPOR       | -1.16693 | 3.417725 | 1.89E-05 | 0.000384 |
| MIRLET7BHG | 2.342547 | -0.91798 | 1.89E-05 | 0.000385 |
| AL590714   | 1.088936 | 2.241819 | 1.94E-05 | 0.000391 |
| FGR        | -6.53338 | -3.01383 | 1.94E-05 | 0.000391 |
| CSTA       | -1.46736 | 1.099058 | 1.94E-05 | 0.000391 |
| ARRDC4     | 1.492467 | 0.610604 | 1.94E-05 | 0.000392 |
| MIR22HG    | 1.08876  | 3.564582 | 1.96E-05 | 0.000394 |
| PAQR4      | 1.598996 | 3.665472 | 1.96E-05 | 0.000394 |
| C1GALT1C1  | -2.18652 | 4.564698 | 2.00E-05 | 0.0004   |
| OR1F1      | -1.66815 | -0.36087 | 2.05E-05 | 0.000409 |
| AC090360   | 6.4321   | -3.01691 | 2.10E-05 | 0.000417 |
| PPM1M      | -1.44971 | 3.329328 | 2.10E-05 | 0.000418 |
| TMEM92     | -1.57171 | 0.319757 | 2.11E-05 | 0.000418 |
| HSD17B12   | -1.04078 | 7.151617 | 2.14E-05 | 0.000423 |
| SLC25A45   | -1.07969 | 3.569836 | 2.15E-05 | 0.000426 |
| RNU4ATAC   | 4.012822 | -1.84569 | 2.19E-05 | 0.000433 |

|                |          |          |          |          |
|----------------|----------|----------|----------|----------|
| CDK18          | -1.5021  | 2.889526 | 2.22E-05 | 0.000438 |
| CYP21A2        | 6.486953 | -2.96239 | 2.27E-05 | 0.000446 |
| SARDH          | -1.05348 | 2.507942 | 2.27E-05 | 0.000446 |
| TMEM121B       | 6.615497 | -2.86043 | 2.35E-05 | 0.00046  |
| SYNE3          | -1.39065 | 0.981394 | 2.42E-05 | 0.000469 |
| AL928921       | -1.52276 | 1.080414 | 2.42E-05 | 0.000469 |
| AC244033       | -1.29204 | 0.678882 | 2.43E-05 | 0.000469 |
| CKM            | 2.622252 | -1.50344 | 2.43E-05 | 0.00047  |
| NYAP1          | -1.22983 | 1.424265 | 2.51E-05 | 0.000484 |
| A4GALT         | -1.0074  | 2.51292  | 2.55E-05 | 0.000491 |
| RMRP           | 3.773387 | 0.578805 | 2.60E-05 | 0.0005   |
| H3C12          | 2.24796  | -1.13381 | 2.61E-05 | 0.000501 |
| MMP23B         | 6.310409 | -3.10998 | 2.61E-05 | 0.000501 |
| AC004898       | 6.329044 | -3.10378 | 2.66E-05 | 0.00051  |
| SRPX           | -1.14793 | 3.19264  | 2.70E-05 | 0.000516 |
| TNRC18P1       | 2.974347 | -1.04143 | 2.72E-05 | 0.00052  |
| MCHR1          | 7.200828 | -2.43223 | 2.72E-05 | 0.00052  |
| TEPP           | -1.85343 | -1.10047 | 2.88E-05 | 0.000546 |
| ADH1A          | 1.120969 | 1.668551 | 2.88E-05 | 0.000546 |
| KRT8P41        | 6.288396 | -3.11712 | 2.89E-05 | 0.000547 |
| AC023154       | 6.455418 | -2.99661 | 2.94E-05 | 0.000555 |
| AC026740       | 2.143025 | -1.14359 | 2.94E-05 | 0.000555 |
| SNORD3D        | 2.839066 | -1.79557 | 2.94E-05 | 0.000555 |
| AC062037       | 1.746882 | -0.31356 | 2.98E-05 | 0.00056  |
| CAMKV          | -1.45867 | 0.215574 | 3.03E-05 | 0.000567 |
| SLCO4C1        | -2.10103 | -0.4981  | 3.04E-05 | 0.000569 |
| SNORC          | -1.03807 | 2.895084 | 3.05E-05 | 0.00057  |
| RNVU1-27       | 2.729076 | -1.78459 | 3.11E-05 | 0.000581 |
| TMEM178A       | -2.00562 | 0.114504 | 3.12E-05 | 0.000581 |
| SERPINA5       | -1.16701 | 2.057474 | 3.13E-05 | 0.000583 |
| D2HGDH         | -1.16501 | 2.15956  | 3.15E-05 | 0.000585 |
| CALN1          | -1.01472 | 2.645592 | 3.17E-05 | 0.000589 |
| C1orf105       | 2.095134 | -0.54094 | 3.21E-05 | 0.000596 |
| ORAI2          | -1.0949  | 3.611491 | 3.21E-05 | 0.000596 |
| RPL17-C18orf32 | -12.422  | 2.502356 | 3.22E-05 | 0.000597 |
| EGR2           | 6.41278  | -3.03661 | 3.27E-05 | 0.000606 |
| AC069288       | 2.779129 | 2.24578  | 3.33E-05 | 0.000613 |
| AJ239322       | 6.268501 | -3.13748 | 3.35E-05 | 0.000616 |
| DSC3           | 1.078065 | 2.787621 | 3.36E-05 | 0.000618 |
| TNFRSF1B       | -2.24363 | -0.12263 | 3.44E-05 | 0.00063  |
| RAPSN          | 6.770515 | -2.76149 | 3.47E-05 | 0.000634 |
| ADAM19         | -1.60554 | 3.199299 | 3.47E-05 | 0.000635 |
| H4C8           | 1.577434 | 0.471898 | 3.48E-05 | 0.000636 |
| ZNF528         | 2.31475  | -0.50738 | 3.53E-05 | 0.000644 |
| AC124852       | 7.077399 | -2.50741 | 3.65E-05 | 0.000663 |
| DCAF13P3       | 6.349234 | -3.07076 | 3.77E-05 | 0.000682 |
| L3MBTL2-AS1    | 6.403171 | -3.0268  | 3.78E-05 | 0.000683 |
| ARL4D          | -1.08045 | 2.732312 | 3.78E-05 | 0.000683 |



|           |          |          |          |          |
|-----------|----------|----------|----------|----------|
| JAKMIP3   | 1.902328 | -0.99711 | 3.80E-05 | 0.000687 |
| NTN5      | -2.22462 | -1.31062 | 3.86E-05 | 0.000695 |
| MIR193BHG | 1.832156 | 0.04439  | 3.93E-05 | 0.000706 |
| AC123595  | 4.378673 | -2.73525 | 3.95E-05 | 0.000708 |
| LINC02609 | -1.50336 | 0.296933 | 3.97E-05 | 0.000711 |
| SCAMP5    | 1.457738 | 2.683871 | 4.01E-05 | 0.000717 |
| ERICH2    | -1.73402 | -0.35823 | 4.14E-05 | 0.000736 |
| ADAMTS4   | 7.287054 | -2.35086 | 4.19E-05 | 0.000745 |
| NCAM2     | -1.76167 | 0.284714 | 4.21E-05 | 0.000747 |
| FLJ13224  | 3.266553 | -1.62093 | 4.32E-05 | 0.000763 |
| HDC       | 6.249818 | -3.15731 | 4.38E-05 | 0.000773 |
| FBXW4P1   | 1.867392 | -0.86017 | 4.39E-05 | 0.000773 |
| UBE2FP1   | 1.613545 | -0.37987 | 4.52E-05 | 0.000793 |
| PRR19     | 1.109742 | 1.532395 | 4.52E-05 | 0.000793 |
| MYO7A     | -1.45202 | 0.65843  | 4.53E-05 | 0.000794 |
| SLC5A5    | -1.16264 | 1.861518 | 4.72E-05 | 0.000825 |
| ATP8B3    | -1.05739 | 2.61152  | 4.83E-05 | 0.00084  |
| PTENP1-AS | 6.496952 | -2.94699 | 4.84E-05 | 0.000841 |
| SLC35G5   | 6.418716 | -3.034   | 4.85E-05 | 0.000841 |
| Z99774    | 4.675133 | -2.93813 | 4.87E-05 | 0.000844 |
| YBX2      | -1.0308  | 3.083988 | 4.88E-05 | 0.000845 |
| CHMP1B2P  | -1.0312  | 2.291369 | 4.98E-05 | 0.000861 |
| TNS4      | -1.30453 | 1.470806 | 5.32E-05 | 0.000912 |
| SMG1P3    | 1.385035 | 2.157567 | 5.35E-05 | 0.000915 |
| NAAA      | 1.584933 | 0.077891 | 5.36E-05 | 0.000917 |
| FXVD1     | -1.77198 | -0.10366 | 5.43E-05 | 0.000927 |
| OSTCP1    | 6.236921 | -3.1614  | 5.45E-05 | 0.000929 |
| HSH2D     | -1.19901 | 1.750531 | 5.53E-05 | 0.00094  |
| BMP2      | 1.017497 | 2.367744 | 5.57E-05 | 0.000945 |
| CFAP97D1  | 3.742607 | -1.73226 | 5.70E-05 | 0.000963 |
| RASSF2    | -1.59606 | 0.262716 | 5.72E-05 | 0.000966 |
| WNT9A     | 1.58585  | 0.05951  | 5.80E-05 | 0.000977 |
| AL355385  | -6.28847 | -1.04869 | 6.11E-05 | 0.001023 |
| CD226     | 6.946865 | -2.60131 | 6.15E-05 | 0.001028 |
| SCN5A     | -6.39785 | -3.10088 | 6.15E-05 | 0.001028 |
| MST1R     | -1.33523 | 0.426776 | 6.21E-05 | 0.001037 |
| AL133517  | -1.55731 | 0.143259 | 6.27E-05 | 0.001045 |
| SRGAP2B   | -1.07158 | 3.951407 | 6.29E-05 | 0.001046 |
| PPP1R1C   | -1.87737 | 0.206337 | 6.42E-05 | 0.001066 |
| RPL4P6    | 1.896847 | -0.23899 | 6.45E-05 | 0.00107  |
| SELPLG    | 3.09615  | -0.88747 | 6.52E-05 | 0.001078 |
| FAM209A   | 3.339752 | -2.21279 | 6.66E-05 | 0.0011   |
| DAG1      | 2.094039 | 5.881093 | 6.70E-05 | 0.001106 |
| ETS1      | 1.319496 | 1.332382 | 6.71E-05 | 0.001108 |
| MAP3K14   | 1.133896 | 4.745102 | 6.72E-05 | 0.001108 |
| RASAL1    | -2.0125  | -0.52733 | 6.75E-05 | 0.001111 |
| IL15RA    | 1.946914 | -0.71893 | 6.84E-05 | 0.001124 |
| DOK6      | -1.01095 | 3.057325 | 6.86E-05 | 0.001125 |

|                |          |          |          |          |
|----------------|----------|----------|----------|----------|
| PKD1L1         | 3.096845 | -0.83776 | 6.88E-05 | 0.001127 |
| AC006128       | -1.71326 | 0.424026 | 6.89E-05 | 0.001128 |
| CYP2E1         | 2.054809 | -0.88107 | 6.94E-05 | 0.001133 |
| SMIM10L2B      | -1.0419  | 1.694497 | 6.97E-05 | 0.001138 |
| PIK3R5         | -2.66489 | -1.40855 | 6.99E-05 | 0.001139 |
| SLC35G6        | 4.150117 | -2.21224 | 7.05E-05 | 0.001147 |
| APBB1          | -1.009   | 2.436039 | 7.19E-05 | 0.001166 |
| ABCG5          | 6.132452 | -3.22358 | 7.22E-05 | 0.00117  |
| RAB3C          | -6.27986 | -3.19946 | 7.24E-05 | 0.001171 |
| AL031985       | -1.13583 | 1.136508 | 7.32E-05 | 0.001182 |
| VSIG1          | 1.076447 | 1.58742  | 7.35E-05 | 0.001186 |
| EFEMP2         | -1.2317  | 1.28981  | 7.47E-05 | 0.001202 |
| C1GALT1P1      | 6.267353 | -3.13744 | 7.50E-05 | 0.001204 |
| TNK2-AS1       | 6.475735 | -2.96541 | 7.56E-05 | 0.001213 |
| FARP1-AS1      | 4.342003 | -2.73387 | 7.59E-05 | 0.001216 |
| HSD11B1-AS1    | -6.99505 | -2.64773 | 7.60E-05 | 0.001217 |
| RNU1-1         | 3.248192 | -2.12661 | 7.63E-05 | 0.001221 |
| DSCAML1        | -2.08092 | -0.16025 | 7.86E-05 | 0.001251 |
| DCLK2          | 1.038109 | 2.590012 | 7.89E-05 | 0.001251 |
| AIF1           | -7.03397 | -2.60318 | 7.93E-05 | 0.001256 |
| LINC02595      | 1.319647 | 0.159227 | 8.15E-05 | 0.001284 |
| C1orf189       | 2.736234 | -1.10812 | 8.29E-05 | 0.001305 |
| AC116535       | 4.144615 | -2.48964 | 8.30E-05 | 0.001305 |
| LINC01943      | 3.952081 | -2.35161 | 8.34E-05 | 0.00131  |
| RPL36A-HNRNPH2 | -10.6575 | 0.747853 | 8.41E-05 | 0.001318 |
| AC009506       | 1.009554 | 2.156192 | 8.43E-05 | 0.001321 |
| ITGAM          | 2.484585 | -0.41464 | 8.45E-05 | 0.001324 |
| CD300LB        | 6.047411 | -3.29562 | 8.53E-05 | 0.001334 |
| AC005082       | 6.079765 | -3.26227 | 8.68E-05 | 0.001354 |
| KCNJ14         | 1.483735 | 0.518651 | 8.69E-05 | 0.001356 |
| ZNF254         | -1.07127 | 2.580943 | 8.86E-05 | 0.001377 |
| PTK7           | -1.14572 | 1.733283 | 8.95E-05 | 0.001389 |
| SH3GL1P1       | 1.94948  | 0.219832 | 9.00E-05 | 0.001397 |
| RIPOR3         | -1.77819 | -0.53461 | 9.19E-05 | 0.001421 |
| ZFP28          | 1.03363  | 1.882186 | 9.21E-05 | 0.001421 |
| TFF2           | -1.33764 | 0.553623 | 9.21E-05 | 0.001421 |
| HOXD8          | 6.402483 | -3.01478 | 9.31E-05 | 0.001435 |
| FOXD4L4        | 3.369364 | -2.36054 | 9.36E-05 | 0.001441 |
| OR52A1         | 6.183638 | -3.19309 | 9.41E-05 | 0.001448 |
| H4C3           | 1.90542  | -0.13731 | 9.61E-05 | 0.001473 |
| RPS20P22       | 2.881291 | -1.44164 | 9.66E-05 | 0.001479 |
| TMOD2          | -1.47213 | 0.789106 | 9.67E-05 | 0.001479 |
| HSP90AB4P      | 4.417357 | -2.00147 | 9.70E-05 | 0.001482 |
| LINC01711      | 6.823887 | -2.70246 | 9.72E-05 | 0.001483 |
| MAGEB2         | 1.042139 | 1.799188 | 9.78E-05 | 0.00149  |
| GRID2IP        | -3.46949 | -2.43399 | 0.0001   | 0.001522 |
| KRT8P46        | 2.229246 | -0.87835 | 0.000101 | 0.001522 |

|              |          |          |          |          |
|--------------|----------|----------|----------|----------|
| KLLN         | 1.41899  | 0.66081  | 0.000101 | 0.001529 |
| GMPR         | 6.13298  | -3.23827 | 0.000103 | 0.001551 |
| SLC16A4      | -1.36545 | 0.312546 | 0.000104 | 0.001566 |
| AL162615     | 2.80124  | -2.00348 | 0.000105 | 0.001576 |
| SFRP1        | -6.37478 | -3.12306 | 0.000106 | 0.00158  |
| ODAM         | 1.760359 | -0.28965 | 0.000108 | 0.001616 |
| KDELC1P1     | 6.812049 | -2.71632 | 0.000109 | 0.00162  |
| AL096854     | -3.26369 | -1.81648 | 0.00011  | 0.001631 |
| ANXA13       | -3.27322 | -1.28113 | 0.00011  | 0.001632 |
| PON1         | 1.152927 | 0.708983 | 0.000117 | 0.001732 |
| HSPD1P7      | 6.156202 | -3.23157 | 0.00012  | 0.001766 |
| MIR1244-2    | 2.555659 | 2.261241 | 0.00012  | 0.001773 |
| H4C15        | 1.249201 | 2.283961 | 0.00012  | 0.001773 |
| KRT8P12      | 1.018502 | 2.21435  | 0.00012  | 0.001774 |
| RASA4CP      | -1.6343  | 1.651946 | 0.000122 | 0.001794 |
| IFITM3P3     | 6.45431  | -2.97307 | 0.000126 | 0.001837 |
| TLCD3B       | -6.34994 | -3.14628 | 0.000126 | 0.001843 |
| AL121581     | -7.9268  | -1.85512 | 0.000128 | 0.001868 |
| VWCE         | 2.110355 | -0.96239 | 0.000128 | 0.001869 |
| NPC1L1       | -1.34368 | -0.04702 | 0.000129 | 0.001873 |
| OPRD1        | 3.147892 | -2.21492 | 0.000131 | 0.001901 |
| TUBBP10      | 3.205149 | -2.01759 | 0.000131 | 0.001901 |
| AC003005     | 6.809585 | -2.72178 | 0.000133 | 0.001932 |
| FBXO36       | -1.12632 | 1.629944 | 0.000137 | 0.001977 |
| SSC5D        | 3.757538 | -1.44353 | 0.000138 | 0.001996 |
| CCDC153      | -1.05851 | 1.418804 | 0.000139 | 0.002009 |
| GRAMD4P8     | 6.228486 | -3.17897 | 0.00014  | 0.002013 |
| PNPLA3       | -1.02308 | 1.519205 | 0.000141 | 0.002024 |
| RFPL4AL1     | 6.958756 | -2.61455 | 0.000144 | 0.002069 |
| ZNF98        | 1.134584 | 0.950089 | 0.000146 | 0.002094 |
| LAMC3        | -6.09513 | -3.32174 | 0.000147 | 0.002107 |
| ZNF460       | 1.223375 | 1.063213 | 0.000148 | 0.002112 |
| ZBTB20       | 1.522156 | 0.021942 | 0.000149 | 0.002123 |
| KRT18P59     | 2.856456 | -1.87707 | 0.000153 | 0.002173 |
| SNORD3C      | 3.622333 | -2.16326 | 0.000154 | 0.002183 |
| NGFR         | 1.602032 | -0.26584 | 0.000154 | 0.002188 |
| TRIM39-RPP21 | 10.25581 | 0.384538 | 0.000154 | 0.002191 |
| AL133163     | 5.959866 | -3.34303 | 0.000154 | 0.002191 |
| KIF1A        | -1.15056 | 0.690988 | 0.000157 | 0.002219 |
| SRGN         | -1.17833 | 0.825691 | 0.000157 | 0.00223  |
| ECHDC3       | -1.39261 | 1.176388 | 0.000158 | 0.002231 |
| DBH-AS1      | -1.26049 | 0.502418 | 0.000161 | 0.002277 |
| GALNT6       | -1.02089 | 1.685719 | 0.000165 | 0.002328 |
| METTL27      | -1.50989 | -0.12349 | 0.00017  | 0.002383 |
| AC072061     | 1.510219 | -0.11536 | 0.000171 | 0.002393 |
| LINC02709    | 1.576369 | -0.10809 | 0.000171 | 0.002399 |
| BHMT         | 2.303935 | -1.40612 | 0.000176 | 0.002449 |
| CHST7        | -1.08951 | 1.355208 | 0.000176 | 0.002453 |

|            |          |          |          |          |
|------------|----------|----------|----------|----------|
| MAGEB6     | 1.416679 | -0.09872 | 0.000176 | 0.002453 |
| TMC8       | -1.08529 | 1.176371 | 0.000179 | 0.002491 |
| GP5        | 6.177675 | -3.18001 | 0.00018  | 0.002496 |
| C11orf86   | -2.41063 | -0.01404 | 0.000182 | 0.002517 |
| FUT1       | -2.42335 | -0.72436 | 0.000184 | 0.002537 |
| MT-TH      | 1.254293 | 1.806772 | 0.000184 | 0.002546 |
| AL391825   | 1.986838 | -0.6972  | 0.000184 | 0.002546 |
| OLFML3     | 2.593689 | -1.66294 | 0.000185 | 0.00255  |
| TM6SF2     | -1.22911 | 1.097156 | 0.000187 | 0.002572 |
| SLC16A6    | -1.35418 | 0.354649 | 0.000188 | 0.002587 |
| SLC22A31   | -1.65387 | -0.24142 | 0.000189 | 0.002595 |
| SEMA7A     | 1.061019 | 1.474351 | 0.000191 | 0.002611 |
| LRRC37A2   | 1.040087 | 1.893202 | 0.000193 | 0.00264  |
| RPA4       | 1.916471 | -1.2757  | 0.000193 | 0.002641 |
| P2RY4      | -3.29088 | -2.30723 | 0.000193 | 0.002641 |
| LINC00528  | 6.111441 | -3.26054 | 0.000196 | 0.002677 |
| PCDH19     | 6.670506 | -2.81872 | 0.000199 | 0.00271  |
| FLJ31356   | 3.456586 | -2.28154 | 0.0002   | 0.002723 |
| LIMS4      | 8.480908 | -1.28273 | 0.000201 | 0.002733 |
| ZNF404     | -1.1901  | 0.618063 | 0.000202 | 0.002739 |
| PPP1R3G    | -3.13203 | -2.13147 | 0.000206 | 0.002792 |
| LGALS9     | 1.752739 | -0.46425 | 0.000208 | 0.00281  |
| ASPHD2     | -1.41197 | 0.072439 | 0.000208 | 0.002814 |
| ADGRF4     | 1.778784 | -0.9907  | 0.000209 | 0.00283  |
| NRTN       | -1.09567 | 1.602755 | 0.000211 | 0.002851 |
| TM4SF1-AS1 | -1.10236 | 1.256469 | 0.000212 | 0.002857 |
| CFLAR-AS1  | 1.43845  | -0.03809 | 0.000212 | 0.002858 |
| ADM5       | 1.638261 | 1.419886 | 0.000212 | 0.002861 |
| AZGP1      | -1.41793 | -0.17862 | 0.000213 | 0.002868 |
| CGB2       | -1.522   | -0.38776 | 0.000215 | 0.002884 |
| ORAI1      | -1.01429 | 4.628348 | 0.000215 | 0.002889 |
| HMGN2P4    | 3.547057 | -2.67068 | 0.000219 | 0.002938 |
| LINC00589  | -6.75565 | -2.83478 | 0.000223 | 0.002975 |
| ZBED6      | 2.889247 | 4.790191 | 0.000224 | 0.002991 |
| HSPE1P7    | 6.689436 | -2.82299 | 0.000229 | 0.003051 |
| AC104958   | -1.00931 | 1.829518 | 0.000233 | 0.003094 |
| MIR6821    | 3.048647 | -2.60616 | 0.000233 | 0.003095 |
| GRIN3B     | -4.03643 | -2.07087 | 0.000234 | 0.003102 |
| FAM71F2    | 2.566044 | -1.89859 | 0.000235 | 0.003109 |
| AKR1B10    | 2.856302 | -1.58497 | 0.000235 | 0.003109 |
| RN7SL751P  | 3.239411 | -2.67217 | 0.000235 | 0.003115 |
| CT45A7     | 1.243221 | 1.830082 | 0.000236 | 0.003124 |
| COX6B2     | -1.63442 | -0.34943 | 0.000237 | 0.003132 |
| HNRNPCP1   | 1.472245 | -0.39664 | 0.000238 | 0.00314  |
| CREB5      | 2.982287 | -0.99216 | 0.00024  | 0.00317  |
| LINC01305  | -6.85141 | -2.77696 | 0.000248 | 0.003242 |
| NPM1P39    | 1.065324 | 1.840472 | 0.000248 | 0.003242 |
| LINC02761  | -5.9062  | -3.44895 | 0.000249 | 0.003258 |

|                |          |          |          |          |
|----------------|----------|----------|----------|----------|
| RAB3A          | -1.0465  | 1.009188 | 0.000252 | 0.003285 |
| MSI1           | -1.15787 | 0.788983 | 0.000254 | 0.003298 |
| FUT6           | -1.12642 | 1.277768 | 0.000255 | 0.00331  |
| ARHGAP19-SLIT1 | -6.16076 | -3.26778 | 0.000258 | 0.003342 |
| PCED1B         | -1.7966  | 1.409547 | 0.000258 | 0.003347 |
| RFPL4A         | 6.695545 | -2.84167 | 0.000259 | 0.003356 |
| ADAMTS1        | 6.787819 | -2.75528 | 0.000264 | 0.003405 |
| AQP8           | 6.117409 | -3.24308 | 0.000264 | 0.003408 |
| Z95331         | 1.240148 | 0.562178 | 0.000265 | 0.003416 |
| SNHG27         | 2.508574 | -1.81205 | 0.000267 | 0.00344  |
| IL17C          | 5.980644 | -3.34836 | 0.000269 | 0.003456 |
| TCP11L2        | -1.08038 | 2.020565 | 0.000272 | 0.003492 |
| VMO1           | -1.24402 | 0.299198 | 0.000273 | 0.0035   |
| AFF1           | -1.01138 | 4.23719  | 0.00028  | 0.003572 |
| CHST6          | -1.76686 | 1.907197 | 0.000283 | 0.003599 |
| GAPDHP52       | 3.882511 | -2.713   | 0.000285 | 0.00362  |
| RNU1-27P       | 2.394759 | -2.03115 | 0.000289 | 0.003662 |
| MMP25          | 1.719101 | 0.16108  | 0.00029  | 0.003667 |
| CCT8L1P        | 6.014336 | -3.32181 | 0.000293 | 0.003699 |
| TNF            | 1.73336  | -0.93268 | 0.000295 | 0.003727 |
| ALOX5          | -1.44451 | -0.37095 | 0.000297 | 0.003739 |
| ZNF791         | -1.98157 | 2.415329 | 0.000299 | 0.003759 |
| BCAR3-AS1      | -1.23898 | 0.872713 | 0.000299 | 0.003759 |
| AL008628       | 6.089932 | -3.28358 | 0.0003   | 0.003764 |
| AL139274       | 1.532633 | -0.53236 | 0.0003   | 0.003767 |
| GOLGA8N        | -2.19099 | -1.76812 | 0.000302 | 0.003782 |
| ZNF497         | 7.912115 | -1.78726 | 0.000305 | 0.003812 |
| SMIM2          | -5.94895 | -3.41788 | 0.000306 | 0.003822 |
| MIR3189        | -1.44631 | -0.42826 | 0.000308 | 0.003846 |
| HTRA1          | -1.11145 | 1.253966 | 0.000308 | 0.003848 |
| HCAR3          | -1.35781 | 0.060123 | 0.00031  | 0.003865 |
| RRN3P2         | 2.404275 | -1.34109 | 0.000317 | 0.003934 |
| CD177          | -1.61762 | -0.53199 | 0.000317 | 0.003934 |
| ARHGAP9        | 2.343749 | -0.30987 | 0.000324 | 0.003994 |
| SRRM3          | -1.02415 | 1.715102 | 0.000326 | 0.004014 |
| TPBGL          | -1.41979 | -0.00901 | 0.000326 | 0.004014 |
| NAIPP2         | 1.718513 | -0.64031 | 0.000327 | 0.00403  |
| AL512791       | 1.698668 | -0.9942  | 0.000329 | 0.004047 |
| MIR210HG       | -1.12918 | 1.625789 | 0.00033  | 0.004051 |
| PAQR6          | -1.01741 | 1.924539 | 0.000337 | 0.004121 |
| PRKXP1         | 2.912478 | -2.3891  | 0.000341 | 0.004157 |
| LINC00508      | -1.17877 | 0.995669 | 0.000344 | 0.004187 |
| EIF4HP2        | 2.038562 | -0.86727 | 0.000347 | 0.004211 |
| SEC14L1P1      | 1.994247 | -0.33776 | 0.000348 | 0.004231 |
| NUDT16P1       | -1.0429  | 1.481439 | 0.000351 | 0.004252 |
| AC092053       | 2.23028  | -1.93855 | 0.000354 | 0.004289 |
| RC3H1          | 1.357708 | 3.687861 | 0.000356 | 0.0043   |

|            |          |          |          |          |
|------------|----------|----------|----------|----------|
| AC091607   | 3.958466 | -0.578   | 0.000357 | 0.004311 |
| LINC01679  | 3.520475 | -1.92293 | 0.000358 | 0.004315 |
| AC003006   | -6.66608 | -2.91568 | 0.000358 | 0.004315 |
| LCAT       | 1.065022 | 1.617835 | 0.000358 | 0.004315 |
| AC023043   | -1.18601 | 0.321476 | 0.000358 | 0.004318 |
| SYT17      | -1.58933 | -0.16604 | 0.000366 | 0.004397 |
| FHIT       | -1.2218  | 1.040175 | 0.000371 | 0.004447 |
| AP001626   | -2.5505  | -1.27395 | 0.000372 | 0.004452 |
| LINC01132  | 2.164386 | -0.50761 | 0.000373 | 0.004459 |
| FAM83A-AS1 | 6.063408 | -3.27442 | 0.000376 | 0.004494 |
| CD274      | -1.64804 | -0.53285 | 0.000377 | 0.004497 |
| EPHA1      | -1.23324 | 1.047882 | 0.000383 | 0.004564 |
| ZNF551     | 1.605736 | 3.451032 | 0.000385 | 0.004584 |
| CYP26A1    | -1.89011 | 0.408625 | 0.000386 | 0.004588 |
| ULBP2      | -1.2945  | 0.657647 | 0.000389 | 0.004627 |
| ZC3H6      | -1.10687 | 0.660066 | 0.000391 | 0.004642 |
| AC005532   | 2.781093 | -2.24204 | 0.000393 | 0.004656 |
| AGGF1P2    | 5.832796 | -3.44295 | 0.000398 | 0.004705 |
| AL139124   | 4.381159 | -2.73183 | 0.000399 | 0.004713 |
| SLC25A34   | 1.731796 | -0.38108 | 0.000412 | 0.004854 |
| PTHLH      | 2.403918 | -0.84083 | 0.000413 | 0.004865 |
| KCNAB2     | -1.01811 | 1.430506 | 0.00042  | 0.004936 |
| PRRT1      | -1.33046 | -0.06583 | 0.000432 | 0.00506  |
| AC018742   | -6.50489 | -3.02319 | 0.000434 | 0.005069 |
| PRR15      | -1.24684 | 0.851545 | 0.000439 | 0.005123 |
| EMP1       | 6.580503 | -2.91802 | 0.000439 | 0.005123 |
| SLIT2      | 6.471392 | -2.97849 | 0.00044  | 0.005124 |
| LETM1P2    | 3.021749 | -2.17882 | 0.000444 | 0.005161 |
| LINC01488  | 3.64614  | -2.33905 | 0.000446 | 0.005174 |
| FDPS4      | 3.83312  | -2.46802 | 0.000448 | 0.00519  |
| HIGD2B     | 6.560092 | -2.91342 | 0.00045  | 0.005216 |
| MGAT3      | -1.57512 | -1.11347 | 0.000451 | 0.005223 |
| RTBDN      | -1.14006 | 0.369813 | 0.000453 | 0.005242 |
| FRG2B      | 3.196906 | -1.91168 | 0.000455 | 0.005253 |
| DPEP2NB    | 5.982723 | -3.33044 | 0.000455 | 0.005255 |
| CLDN9      | 1.439191 | -0.29591 | 0.000456 | 0.005257 |
| SLC6A13    | 4.050453 | -2.33051 | 0.000457 | 0.005262 |
| AIF1L      | -1.3573  | 2.334463 | 0.000479 | 0.005488 |
| LINC00167  | 3.313599 | -2.23835 | 0.000486 | 0.00555  |
| ZNF772     | 1.270935 | 1.006074 | 0.000497 | 0.005664 |
| LINC00565  | 3.569918 | -2.64666 | 0.000507 | 0.005775 |
| HNRNPA1P54 | 5.742715 | -3.48566 | 0.000508 | 0.005776 |
| ZIK1       | 2.088139 | 0.662657 | 0.000514 | 0.005839 |
| RBM15      | -1.07355 | 2.813314 | 0.000515 | 0.005839 |
| TMEM88     | 2.359794 | -0.76117 | 0.000515 | 0.005842 |
| PSG8       | 5.811211 | -3.44856 | 0.000515 | 0.005842 |
| FBLN2      | -1.12837 | 0.626094 | 0.000516 | 0.00585  |
| RSPH10B    | 3.645813 | -2.14761 | 0.000518 | 0.005865 |

|               |          |          |          |          |
|---------------|----------|----------|----------|----------|
| GGTA2P        | 2.5485   | -2.18191 | 0.00052  | 0.005878 |
| AATBC         | 2.422329 | -1.43043 | 0.000521 | 0.005882 |
| CCL2          | 2.971896 | -2.35425 | 0.000523 | 0.005899 |
| PPIAP72       | 6.682323 | -2.82434 | 0.000524 | 0.005913 |
| MT-TS2        | 1.492961 | 1.749436 | 0.000525 | 0.005918 |
| SLC1A6        | -1.25811 | 1.647945 | 0.000526 | 0.005918 |
| FAM43A        | 2.423168 | -1.2804  | 0.000526 | 0.005918 |
| CLEC10A       | 2.537571 | -1.40327 | 0.000537 | 0.006023 |
| ASS1P2        | 3.069361 | -2.26229 | 0.000538 | 0.006036 |
| PRAF2         | -1.06381 | 4.46559  | 0.000541 | 0.006063 |
| SNORD88B      | 1.505084 | 0.297971 | 0.000544 | 0.006094 |
| ACTBP8        | 1.481248 | -0.43129 | 0.000545 | 0.006098 |
| RASA4B        | -1.34367 | 2.785097 | 0.000545 | 0.006098 |
| MIR7-3HG      | 3.784218 | -2.47377 | 0.000546 | 0.006108 |
| MIR3682       | 2.803379 | -2.4789  | 0.00055  | 0.006138 |
| UCP3          | 1.384508 | 0.026417 | 0.000551 | 0.006146 |
| PCSK6-AS1     | 6.476157 | -2.95289 | 0.000558 | 0.006204 |
| ADAMTS13      | -1.26388 | 1.073162 | 0.000563 | 0.006256 |
| TSPOAP1-AS1   | 1.359266 | 0.084041 | 0.000567 | 0.006286 |
| AL133500      | 8.202373 | -1.53341 | 0.000568 | 0.006296 |
| CHST8         | 6.42928  | -3.03136 | 0.00057  | 0.006316 |
| ZNF503        | 1.083595 | 0.83516  | 0.000571 | 0.006321 |
| AL354928      | 1.81194  | -1.72338 | 0.000571 | 0.006321 |
| SLC22A8       | -1.47646 | -0.40438 | 0.000587 | 0.006483 |
| SYNGR3        | -1.36206 | 2.588298 | 0.000588 | 0.00649  |
| UBTFL6        | 5.700671 | -3.51576 | 0.000589 | 0.006497 |
| SLC6A19       | 1.407329 | 1.122093 | 0.000592 | 0.006517 |
| SLIT1         | 2.143569 | -1.98652 | 0.000597 | 0.00656  |
| RPL12P37      | 6.084114 | -3.26926 | 0.000615 | 0.006733 |
| AL161662      | 3.196276 | -2.31683 | 0.000615 | 0.006733 |
| SNURF         | 1.611329 | 1.688163 | 0.000618 | 0.006757 |
| LINC01004     | 1.287017 | 0.198017 | 0.000623 | 0.0068   |
| DOK3          | 1.240212 | 1.010447 | 0.000642 | 0.006969 |
| LAT2          | 1.230226 | 0.575352 | 0.000646 | 0.007009 |
| NIPSNAP3B     | -1.48217 | -0.58983 | 0.000647 | 0.00701  |
| MYPN          | 1.611844 | -0.41981 | 0.000647 | 0.00701  |
| FER1L6        | 1.676143 | -0.86205 | 0.000648 | 0.007014 |
| SHH           | 3.008278 | -2.31065 | 0.000648 | 0.007014 |
| ELOVL2-AS1    | 1.054794 | 0.867176 | 0.000648 | 0.007014 |
| AC090970      | 1.539074 | -0.80087 | 0.000659 | 0.007127 |
| TMEM61        | -2.14727 | -0.80496 | 0.000664 | 0.007161 |
| ADAM20        | 6.419048 | -2.99586 | 0.000669 | 0.007192 |
| KRT18P16      | 5.724361 | -3.4902  | 0.000669 | 0.007192 |
| SNORD14D      | 1.977676 | -0.55725 | 0.000674 | 0.007233 |
| TIMM23B-AGAP6 | 2.145736 | 0.750993 | 0.000676 | 0.007246 |
| MSS51         | 1.823503 | -0.86153 | 0.000678 | 0.007259 |
| TMEM154       | -3.4505  | -1.10409 | 0.000679 | 0.007263 |

|           |          |          |          |          |
|-----------|----------|----------|----------|----------|
| RPS4XP1   | 2.218207 | -1.931   | 0.000682 | 0.007286 |
| RIMS2     | 6.149237 | -3.23379 | 0.000684 | 0.007302 |
| CYP4F22   | -1.3826  | -0.24864 | 0.000685 | 0.007313 |
| TRIM40    | -2.58852 | -1.62206 | 0.00069  | 0.007361 |
| CDRT4     | 3.743007 | 1.188578 | 0.000691 | 0.007361 |
| AL590787  | 5.856798 | -3.43683 | 0.000692 | 0.00737  |
| MYO15A    | -2.39622 | -1.46876 | 0.000697 | 0.007412 |
| ETV7      | -6.41561 | -3.09532 | 0.000698 | 0.007416 |
| KLK10     | -1.69985 | -1.25502 | 0.0007   | 0.007433 |
| OTUD7A    | -2.88423 | -1.578   | 0.000701 | 0.007433 |
| DMBX1     | 5.768706 | -3.47886 | 0.000704 | 0.007461 |
| GSDMB     | -1.12207 | 2.715728 | 0.00071  | 0.007519 |
| AL132777  | 3.18817  | -2.71598 | 0.000717 | 0.007581 |
| LINC01315 | -1.3494  | 0.080131 | 0.000719 | 0.007594 |
| RUFY4     | -5.75238 | -3.55068 | 0.000722 | 0.007622 |
| OVOL1     | 3.501999 | -1.92028 | 0.000726 | 0.007649 |
| FOXD4L1   | 2.974278 | -1.84824 | 0.000726 | 0.007651 |
| VEGFD     | 2.209809 | -1.24442 | 0.000732 | 0.007694 |
| AC079781  | -1.03007 | 0.965504 | 0.000733 | 0.007705 |
| CARTPT    | 6.377576 | -3.0472  | 0.000741 | 0.007765 |
| RNF185    | -1.26556 | 5.483838 | 0.000742 | 0.007773 |
| SPOCK2    | 1.090959 | 0.925053 | 0.000752 | 0.00786  |
| HVCN1     | -2.63563 | -1.75629 | 0.000755 | 0.007877 |
| TAF1L     | 1.563608 | 0.451693 | 0.000761 | 0.00793  |
| PLEKHG6   | -1.13351 | 0.373549 | 0.000762 | 0.007936 |
| HTR7P1    | 1.116762 | 1.11296  | 0.000765 | 0.00796  |
| AC010207  | 2.000841 | -1.6964  | 0.000772 | 0.008014 |
| NOXA1     | -1.19386 | 0.11872  | 0.000772 | 0.008014 |
| TTLL1     | -1.1951  | 0.471868 | 0.000779 | 0.008062 |
| TPRXL     | 6.614297 | -2.84972 | 0.00078  | 0.008074 |
| ALPK2     | -1.57138 | -0.62644 | 0.000785 | 0.008112 |
| MIR3648-1 | 2.344147 | -1.85078 | 0.000788 | 0.008131 |
| KIF4B     | 1.280532 | 0.003494 | 0.000794 | 0.008191 |
| ETV3L     | 6.432702 | -3.01625 | 0.000797 | 0.008205 |
| AC022028  | 5.640389 | -3.55778 | 0.000798 | 0.008214 |
| MIR3658   | 5.218117 | -1.25834 | 0.000801 | 0.008234 |
| AL513303  | 3.244753 | -1.32546 | 0.000802 | 0.008241 |
| AL354740  | 4.210232 | 4.343613 | 0.000803 | 0.008241 |
| AC100847  | -1.6515  | -0.98801 | 0.000808 | 0.008281 |
| TMEM265   | -2.77399 | -2.65053 | 0.000813 | 0.008313 |
| H2AC21    | 3.042826 | -2.4639  | 0.000816 | 0.008332 |
| AC016245  | 5.837367 | -3.44184 | 0.000817 | 0.008343 |
| SEMA3C    | 1.073192 | 1.697427 | 0.000821 | 0.008373 |
| EXD1      | -3.41611 | -2.52627 | 0.000824 | 0.008404 |
| AURKAP1   | 1.75948  | -0.24945 | 0.000833 | 0.008483 |
| B4GALNT4  | -1.01412 | 1.023317 | 0.000839 | 0.00853  |
| RNU1-28P  | 3.073142 | -2.2494  | 0.000845 | 0.008584 |
| CNFN      | -1.10069 | 0.991547 | 0.000847 | 0.008592 |



|            |          |          |          |          |
|------------|----------|----------|----------|----------|
| SAMD14     | 1.969127 | -1.92058 | 0.000861 | 0.008716 |
| RNF208     | -1.32563 | 0.984549 | 0.000862 | 0.008719 |
| HSPA8P5    | 1.229715 | 0.194001 | 0.000862 | 0.008719 |
| ADAMTS7    | -1.93477 | -1.04876 | 0.000862 | 0.008719 |
| AL139805   | 2.322624 | -1.80203 | 0.000865 | 0.008744 |
| LINC00336  | 6.37395  | -3.07674 | 0.000867 | 0.008757 |
| METTL14-DT | 6.554873 | -2.96391 | 0.000872 | 0.008798 |
| TPPP2      | -3.58849 | -2.84168 | 0.000877 | 0.008828 |
| CALCRL     | -1.4643  | 0.193627 | 0.000888 | 0.008923 |
| FOXD1      | 2.008415 | -0.85225 | 0.000892 | 0.008941 |
| NINJ2      | -1.35184 | 0.511244 | 0.000904 | 0.009041 |
| ANAPC1P4   | -8.10695 | -1.66403 | 0.000907 | 0.009063 |
| FBXW10     | 6.24754  | -3.12903 | 0.000907 | 0.009063 |
| AC068506   | -1.44563 | -0.22282 | 0.000928 | 0.009236 |
| TCF7L1     | -1.42538 | -0.2358  | 0.000931 | 0.009256 |
| LINC01909  | 1.831198 | -1.80743 | 0.000937 | 0.0093   |
| MEI1       | -1.70511 | -1.25467 | 0.00094  | 0.009318 |
| CCIN       | 6.130676 | -3.23998 | 0.000957 | 0.009465 |
| GPR132     | -1.31978 | -0.14033 | 0.00096  | 0.009479 |
| MBNL3      | 1.359676 | 0.577813 | 0.00096  | 0.009479 |
| PKIA       | -1.07107 | 0.41927  | 0.000963 | 0.009497 |
| ZNF672     | 1.540642 | 4.232076 | 0.00097  | 0.009559 |
| FDPSP1     | -2.2731  | -1.66555 | 0.000972 | 0.009569 |
| DCAF8L1    | 1.086651 | 0.177962 | 0.000977 | 0.009609 |
| GAS6-DT    | 3.295991 | -2.12899 | 0.001001 | 0.009805 |
| PTPRN      | 1.691425 | -1.23804 | 0.001002 | 0.009805 |
| SOST       | 6.235943 | -3.13255 | 0.001004 | 0.009813 |
| AP002851   | 1.523161 | -0.27048 | 0.001004 | 0.009813 |
| PTGR1      | 1.15895  | 0.990491 | 0.001007 | 0.009833 |
| TMEM51-AS1 | -1.3552  | -0.02446 | 0.001013 | 0.009878 |
| KRT18P63   | 3.266221 | -1.88655 | 0.001014 | 0.009892 |
| PCP4L1     | -1.23301 | 0.551894 | 0.001017 | 0.009913 |
| EPHX4      | -1.1133  | 0.226819 | 0.001019 | 0.009923 |
| ZNF462     | 6.316263 | -3.12265 | 0.00102  | 0.00993  |
| GDF9       | 1.140225 | 0.144736 | 0.001025 | 0.00997  |
| AC135721   | -2.42241 | -1.77905 | 0.001027 | 0.009976 |
| FBXO27     | -1.32733 | 2.801832 | 0.001033 | 0.010024 |
| AC134312   | 4.664639 | -3.35586 | 0.00104  | 0.010086 |
| AC092301   | -6.30489 | -3.17565 | 0.001042 | 0.010096 |
| LINC02475  | -2.52545 | -1.18946 | 0.001045 | 0.010103 |
| EGR3       | 2.487458 | -1.88984 | 0.001063 | 0.01025  |
| NPTX1      | 2.206992 | -0.7497  | 0.001067 | 0.010282 |
| CORIN      | 6.255901 | -3.14067 | 0.001069 | 0.010301 |
| RPL35AP26  | 5.668179 | -3.54409 | 0.00107  | 0.010307 |
| FBLL1      | 1.584497 | -0.38652 | 0.001074 | 0.010334 |
| Z83847     | 2.269723 | -2.05232 | 0.001076 | 0.01034  |
| NPIP12     | 1.16421  | 2.508852 | 0.001078 | 0.010343 |
| TMEM240    | 2.967465 | -1.65291 | 0.001078 | 0.010343 |

|            |          |          |          |          |
|------------|----------|----------|----------|----------|
| CLCP2      | 5.926759 | -3.40024 | 0.001087 | 0.010408 |
| SNAP25-AS1 | -1.08139 | 1.391865 | 0.001089 | 0.01042  |
| RN7SKP203  | 5.547057 | -3.61552 | 0.001091 | 0.010431 |
| NCF1B      | 6.343006 | -3.08533 | 0.001101 | 0.01052  |
| AC139100   | 1.907161 | -2.09268 | 0.00112  | 0.010686 |
| AC005180   | 5.62721  | -3.5539  | 0.001123 | 0.01071  |
| ZNF804A    | 3.428139 | -2.75424 | 0.001125 | 0.010726 |
| HAVCR2     | -1.3522  | -0.5728  | 0.001136 | 0.010817 |
| EOMES      | 2.304113 | -1.74849 | 0.001138 | 0.01083  |
| IRF1-AS1   | -2.17572 | -1.29346 | 0.001143 | 0.010868 |
| HOXB9      | 1.272815 | -0.33899 | 0.001152 | 0.010914 |
| ZNF528-AS1 | 2.943316 | -2.08043 | 0.001176 | 0.011096 |
| AC006252   | -1.172   | 0.3685   | 0.001182 | 0.011149 |
| LINC00942  | 6.248696 | -3.12918 | 0.001189 | 0.011195 |
| ARHGDI3    | 1.873456 | -1.06863 | 0.001194 | 0.011229 |
| CREB3L2    | -1.11165 | 6.300199 | 0.001201 | 0.011292 |
| TBX21      | 6.176207 | -3.19511 | 0.001207 | 0.01134  |
| AL133243   | 1.492369 | -1.11551 | 0.001221 | 0.011453 |
| WNT2B      | -1.3736  | 0.32733  | 0.001222 | 0.011462 |
| AC004854   | 2.600941 | -2.48601 | 0.001225 | 0.011481 |
| RPL23AP6   | 3.480953 | -2.70499 | 0.00123  | 0.011505 |
| RN7SK      | 1.531387 | 0.799173 | 0.001234 | 0.011533 |
| TMEM63C    | -2.0407  | -0.27161 | 0.001236 | 0.011546 |
| CRISPLD2   | 3.272492 | -2.07921 | 0.001247 | 0.011628 |
| TTYH1      | 3.856499 | -3.11406 | 0.00125  | 0.01164  |
| AGGF1P1    | 5.551689 | -3.6148  | 0.001257 | 0.011686 |
| PIGR       | -1.57312 | -1.39472 | 0.001258 | 0.011686 |
| Z92544     | 1.88627  | -0.86767 | 0.001259 | 0.011692 |
| TRIM72     | 6.273225 | -3.16591 | 0.001259 | 0.011693 |
| HNRNPA1P30 | 6.180475 | -3.19306 | 0.001265 | 0.011727 |
| AL161938   | 6.267266 | -3.10936 | 0.001271 | 0.011763 |
| KPNA2P3    | -7.90466 | -1.84466 | 0.001276 | 0.011796 |
| FCRLA      | 2.958817 | -2.36832 | 0.001277 | 0.011796 |
| MT-TL2     | 1.556805 | 2.088278 | 0.001296 | 0.011934 |
| DDX50P1    | 1.831171 | -1.0569  | 0.001306 | 0.012    |
| HAS1       | 6.159905 | -3.19925 | 0.001314 | 0.012054 |
| AC092073   | -8.00762 | -1.78031 | 0.001338 | 0.012247 |
| CDH5       | -1.22669 | -0.08422 | 0.001341 | 0.012262 |
| SPDYE13    | 6.106443 | -3.23012 | 0.001356 | 0.012378 |
| LHFPL3-AS2 | -1.48582 | -0.04194 | 0.001358 | 0.012389 |
| AC027228   | 1.081324 | 0.700316 | 0.001371 | 0.01248  |
| LINC02105  | -6.37611 | -3.13873 | 0.001375 | 0.012512 |
| AC097717   | 3.991017 | -3.00704 | 0.001378 | 0.012528 |
| RHOQ-AS1   | -1.38651 | -0.78288 | 0.001407 | 0.012767 |
| RNVU1-25   | 3.873713 | -3.09743 | 0.001419 | 0.012856 |
| AP000944   | 2.031517 | -1.68426 | 0.001435 | 0.012969 |
| NLGN3      | 1.414403 | 0.224181 | 0.001436 | 0.012973 |
| RASL10A    | 3.368796 | -2.02788 | 0.001456 | 0.013127 |

|           |          |          |          |          |
|-----------|----------|----------|----------|----------|
| LCAL1     | 3.644823 | -2.60799 | 0.001459 | 0.013144 |
| B3GNT4    | -1.00684 | 1.336153 | 0.00146  | 0.013144 |
| SETP17    | 3.385115 | -2.77455 | 0.001469 | 0.013198 |
| SPTBN5    | 1.675134 | -1.12618 | 0.001487 | 0.013324 |
| SSPOP     | -1.0268  | 0.95876  | 0.001498 | 0.013401 |
| LAG3      | 1.585348 | -1.33757 | 0.00151  | 0.013493 |
| AC124068  | 1.595954 | -0.92332 | 0.001513 | 0.013501 |
| AL662797  | 1.51004  | -0.02867 | 0.00155  | 0.01379  |
| AL137784  | -1.83756 | 0.142396 | 0.001551 | 0.013798 |
| AL139220  | -2.04216 | -1.70669 | 0.001557 | 0.013831 |
| NRBF2P6   | 1.854317 | 0.263783 | 0.00156  | 0.01386  |
| TGM4      | 6.078449 | -3.2537  | 0.001563 | 0.013876 |
| SMCR2     | 6.150571 | -3.23421 | 0.001567 | 0.013891 |
| AL732509  | -1.16674 | 0.272851 | 0.001595 | 0.014113 |
| AC137936  | 4.400127 | -3.26041 | 0.001597 | 0.014122 |
| ENPP3     | -2.24616 | -1.395   | 0.001601 | 0.014152 |
| LMX1B     | -1.29178 | -0.14769 | 0.001605 | 0.014179 |
| GIPC3     | 6.174722 | -3.18034 | 0.001608 | 0.014199 |
| LINC02614 | -1.39313 | -0.97485 | 0.001616 | 0.014246 |
| AP001025  | 6.133969 | -3.23887 | 0.001624 | 0.014299 |
| AC011455  | -1.17377 | -0.32413 | 0.001641 | 0.01441  |
| TBC1D3I   | 7.007858 | -2.60312 | 0.001682 | 0.014698 |
| ACTG1P14  | 3.659193 | -2.88766 | 0.001685 | 0.014717 |
| FAM149A   | -1.45459 | -0.31354 | 0.001701 | 0.014844 |
| GSTA3     | -2.06911 | -0.46531 | 0.001704 | 0.014863 |
| PHYHD1    | 3.519272 | -2.70409 | 0.001706 | 0.014873 |
| LINC01770 | -1.0614  | 0.255126 | 0.00172  | 0.014974 |
| CCER2     | 1.57067  | -0.4258  | 0.00174  | 0.015131 |
| PZP       | -1.21105 | -0.20753 | 0.001745 | 0.015166 |
| AP002381  | 1.250858 | -0.37709 | 0.001748 | 0.015192 |
| ZNF844    | 1.431088 | -0.5653  | 0.001749 | 0.015196 |
| GALNT18   | -1.3672  | -0.81332 | 0.001782 | 0.015435 |
| CICP13    | 5.564354 | -3.58999 | 0.001795 | 0.015526 |
| SYCP3     | 6.208199 | -3.16996 | 0.001796 | 0.015528 |
| PSME2P2   | 1.180903 | -0.26605 | 0.001812 | 0.015622 |
| DDR2      | 1.060774 | 1.115967 | 0.00182  | 0.015672 |
| CT45A5    | 1.245357 | 2.061711 | 0.001829 | 0.01572  |
| LINC01659 | -1.16252 | 0.219723 | 0.001829 | 0.01572  |
| BLACAT1   | -6.10348 | -3.31957 | 0.00183  | 0.015721 |
| AC069224  | 1.577444 | -0.76191 | 0.001832 | 0.015737 |
| HAS3      | 1.530106 | -0.12579 | 0.001837 | 0.015772 |
| SETBP1-DT | -1.61794 | -1.52928 | 0.001838 | 0.015772 |
| TCHH      | 3.279024 | -2.23458 | 0.001838 | 0.015772 |
| LINC01882 | 1.056416 | 0.537484 | 0.001865 | 0.01597  |
| HCLS1     | 2.775243 | -1.40495 | 0.001871 | 0.015996 |
| AC009133  | 2.005275 | -1.21736 | 0.001872 | 0.016003 |
| AC012676  | 1.285128 | -0.82527 | 0.001878 | 0.016046 |
| POTEM     | 1.73938  | -0.59705 | 0.001879 | 0.016046 |

|              |          |          |          |          |
|--------------|----------|----------|----------|----------|
| INMT-MINDY4  | -7.7901  | -1.97462 | 0.001893 | 0.016145 |
| MED8-AS1     | -1.25728 | -0.6303  | 0.001894 | 0.016147 |
| ZNF841       | 1.131882 | 2.947972 | 0.001895 | 0.016147 |
| INSYN1       | 1.69781  | -0.94965 | 0.001921 | 0.016336 |
| AL023806     | 1.731899 | -1.65196 | 0.001929 | 0.016394 |
| AC084876     | 1.448477 | -1.18173 | 0.001947 | 0.016529 |
| PLPPR3       | -1.06168 | 1.153374 | 0.001957 | 0.016598 |
| RNU1-2       | 1.668829 | -1.68703 | 0.001967 | 0.016667 |
| SLC5A11      | 2.055421 | -0.46911 | 0.00197  | 0.016681 |
| RNVU1-6      | 3.36069  | -2.55659 | 0.001978 | 0.016743 |
| CD79A        | 2.015037 | -0.61433 | 0.002005 | 0.016944 |
| EN2          | 1.643082 | -1.37316 | 0.002035 | 0.017165 |
| KITLG        | 1.388561 | -0.56966 | 0.002039 | 0.017192 |
| ATP6V1FNB    | 1.112224 | -0.26111 | 0.002045 | 0.017228 |
| DENND6A-DT   | 6.039689 | -3.2983  | 0.002052 | 0.017264 |
| PRSS35       | 1.729442 | -1.42151 | 0.002069 | 0.017359 |
| ZNF628       | -1.41092 | 2.106915 | 0.002072 | 0.017372 |
| NTN1         | -1.0422  | 0.505141 | 0.002075 | 0.017382 |
| SPATA12      | 1.153802 | 0.23919  | 0.002098 | 0.017536 |
| LINC02158    | 6.002428 | -3.30765 | 0.002101 | 0.017543 |
| SPICE1       | -1.25797 | 2.992496 | 0.002112 | 0.017626 |
| NEK2P4       | 2.007602 | -2.08929 | 0.002112 | 0.017626 |
| BGLAP        | 2.699377 | -2.68297 | 0.002135 | 0.017771 |
| MAGEB17      | 6.040027 | -3.31508 | 0.00214  | 0.017797 |
| TSPAN18      | -1.31541 | -0.96249 | 0.002145 | 0.017829 |
| AL049775     | 1.052252 | 0.884268 | 0.002155 | 0.017901 |
| FNDC7        | 6.018552 | -3.3212  | 0.002162 | 0.017943 |
| RAB4B-EGLN2  | 3.623479 | 0.618601 | 0.002164 | 0.017954 |
| AC027702     | 3.506911 | -2.74169 | 0.002169 | 0.017988 |
| RUNDC3B      | 2.108745 | -1.29097 | 0.002177 | 0.018048 |
| KCNH2        | -1.27585 | -0.6406  | 0.002201 | 0.018214 |
| ZNF562       | 1.287055 | 3.794057 | 0.002206 | 0.018233 |
| SCRT1        | 6.092026 | -3.25006 | 0.00223  | 0.018399 |
| PYY          | -1.92364 | -1.99616 | 0.00224  | 0.018456 |
| ARHGEF35-AS1 | -1.40237 | 3.925997 | 0.002247 | 0.018506 |
| COL11A2      | 1.525347 | -0.41128 | 0.002249 | 0.018512 |
| TPD52L1      | -1.20526 | 0.192282 | 0.002257 | 0.018567 |
| BMS1P17      | 2.51578  | -0.32116 | 0.002261 | 0.018592 |
| CYP4A22-AS1  | -6.12092 | -3.29631 | 0.002291 | 0.018788 |
| AC078883     | -2.24597 | -2.10424 | 0.002316 | 0.018968 |
| VHLL         | 5.914764 | -3.366   | 0.002329 | 0.019057 |
| DENND6B      | -1.10779 | 0.015588 | 0.002333 | 0.019069 |
| LINC01764    | 1.292807 | -0.01366 | 0.002348 | 0.019162 |
| AL589666     | 1.232472 | 0.658912 | 0.002353 | 0.019201 |
| PEAR1        | -1.31227 | -0.45891 | 0.002358 | 0.019227 |
| PPIAP3       | 2.882684 | -2.72692 | 0.002362 | 0.019232 |
| CENPVL2      | 5.378782 | -3.72252 | 0.002377 | 0.019339 |
| AL513348     | 5.965016 | -3.3533  | 0.002433 | 0.019691 |

|            |          |          |          |          |
|------------|----------|----------|----------|----------|
| CATIP-AS1  | -1.0932  | 0.583181 | 0.002434 | 0.019691 |
| TDRD6      | 5.957829 | -3.37321 | 0.002439 | 0.019707 |
| KRT8P28    | 5.347416 | -3.7291  | 0.002443 | 0.01973  |
| BCAR4      | 5.98162  | -3.31377 | 0.00246  | 0.019842 |
| NDUFA4L2   | -1.2057  | 0.332269 | 0.002465 | 0.019875 |
| LINC00943  | 3.534762 | -2.67918 | 0.002466 | 0.019884 |
| MIR3648-2  | 2.828278 | -2.47855 | 0.002469 | 0.019896 |
| BTG3-AS1   | 1.208867 | -0.57312 | 0.00247  | 0.019896 |
| NOS3       | -1.28447 | -0.54846 | 0.002483 | 0.019982 |
| LINC00514  | 1.769049 | -0.62567 | 0.002492 | 0.020049 |
| NXPH4      | -1.14283 | 0.681688 | 0.00252  | 0.02024  |
| RAB43      | -1.30649 | 3.610738 | 0.002527 | 0.020281 |
| EXOSC6     | 1.774211 | 2.13526  | 0.002528 | 0.020287 |
| RSPH10B2   | 2.77004  | -2.02043 | 0.00259  | 0.020716 |
| DFFBP1     | 1.628794 | -0.99405 | 0.002597 | 0.020762 |
| CGB7       | -1.18424 | -0.2999  | 0.002604 | 0.020796 |
| RNF138P1   | 3.691041 | -3.20987 | 0.002607 | 0.020801 |
| RNF151     | 2.695562 | -2.20511 | 0.002627 | 0.02093  |
| AC090181   | 1.860546 | -1.88891 | 0.002629 | 0.020937 |
| SLCO5A1    | 5.944272 | -3.359   | 0.002652 | 0.021095 |
| COL17A1    | 3.414805 | -2.76322 | 0.002665 | 0.021181 |
| AC010619   | 4.848931 | -3.40258 | 0.002673 | 0.021223 |
| AC002350   | 1.193699 | -0.68016 | 0.002687 | 0.021322 |
| NCCRP1     | 1.250182 | -0.0862  | 0.002707 | 0.021427 |
| DHFR2      | -1.57554 | 1.584795 | 0.002709 | 0.021433 |
| AC012443   | 1.094957 | -0.00925 | 0.002715 | 0.021469 |
| AL445931   | 5.889929 | -3.37247 | 0.00272  | 0.021495 |
| CRACDL     | -1.40379 | -0.86418 | 0.002724 | 0.021511 |
| AL354836   | 1.271642 | -0.25276 | 0.00273  | 0.021533 |
| AL161431   | -1.4315  | -0.79656 | 0.002751 | 0.021671 |
| TMEM163    | 5.930471 | -3.38056 | 0.002799 | 0.021971 |
| AL669818   | 5.276389 | -3.7688  | 0.002816 | 0.022084 |
| LBH        | 6.66477  | -2.79922 | 0.002832 | 0.022178 |
| LRIT3      | 5.92546  | -3.36347 | 0.002844 | 0.022237 |
| SYCE1L     | -1.39304 | -1.02339 | 0.002848 | 0.02225  |
| COPZ2      | 2.728362 | -1.95002 | 0.002851 | 0.022268 |
| SALL3      | 5.27023  | -3.77004 | 0.002866 | 0.022351 |
| ECT2L      | 3.350692 | -2.80369 | 0.00287  | 0.022366 |
| VN1R1      | 5.81634  | -3.42792 | 0.002873 | 0.022382 |
| ANKRD65    | 6.072366 | -3.2398  | 0.00291  | 0.022603 |
| SMIM1      | -1.09528 | 0.926068 | 0.002915 | 0.022632 |
| AL136038   | 1.832136 | -1.9915  | 0.002927 | 0.022712 |
| IL3RA      | 1.617185 | -1.36659 | 0.002947 | 0.022847 |
| AC018523   | 6.803592 | -2.6913  | 0.002953 | 0.022881 |
| SLC2A1-AS1 | -2.25502 | -1.60286 | 0.002957 | 0.022911 |
| GMCL1P2    | 5.281207 | -3.76762 | 0.002964 | 0.022953 |
| LTA        | 2.595977 | -1.41781 | 0.00297  | 0.022991 |
| AL031709   | 5.32401  | -3.75913 | 0.002973 | 0.023003 |

|             |          |          |          |          |
|-------------|----------|----------|----------|----------|
| MMP10       | 5.344038 | -3.7298  | 0.002975 | 0.023015 |
| Z73429      | -3.40043 | -2.75893 | 0.002981 | 0.023054 |
| ZBTB37      | 1.609235 | 2.973918 | 0.002983 | 0.023056 |
| AL162419    | 5.912343 | -3.34883 | 0.003068 | 0.02361  |
| AC007365    | 2.033752 | -1.2147  | 0.003086 | 0.02373  |
| SYT3        | -1.03399 | 0.040221 | 0.003097 | 0.023808 |
| ARHGAP30    | 1.183818 | 0.001354 | 0.003112 | 0.023891 |
| KRT78       | 5.883436 | -3.41108 | 0.003135 | 0.024042 |
| AC096633    | 5.888774 | -3.37244 | 0.003139 | 0.024055 |
| LGALS4      | 1.116151 | 0.392437 | 0.00316  | 0.024194 |
| RPL7P4      | 5.304494 | -3.76287 | 0.003166 | 0.024238 |
| SH2D3C      | -1.47565 | -0.21531 | 0.003184 | 0.024356 |
| PKD1L3      | 5.894302 | -3.37167 | 0.003212 | 0.024523 |
| SLC4A1APP1  | -1.65178 | 1.256691 | 0.003223 | 0.02459  |
| HSPE1P6     | 5.35196  | -3.72847 | 0.003249 | 0.024763 |
| KIF26B      | 3.130276 | -2.19936 | 0.003255 | 0.02479  |
| OVGP1       | -1.16066 | -0.11997 | 0.003265 | 0.024859 |
| NAV3        | 5.777944 | -3.45659 | 0.003285 | 0.02499  |
| TMPRSS9     | 1.727748 | -1.40577 | 0.00335  | 0.025412 |
| ZSCAN18     | 1.125399 | 0.02334  | 0.003353 | 0.025431 |
| ACP5        | -1.12923 | -0.34727 | 0.003371 | 0.025545 |
| SYNC        | -1.34284 | -0.71604 | 0.003372 | 0.025552 |
| LILRB3      | 2.073798 | -2.0456  | 0.003381 | 0.025611 |
| PELI2       | 3.490106 | -2.7341  | 0.003382 | 0.025611 |
| LMF1        | -1.18623 | 0.317219 | 0.003392 | 0.025659 |
| HSD17B3     | 5.88235  | -3.37406 | 0.003403 | 0.025728 |
| AC027290    | 1.654661 | -1.31429 | 0.00342  | 0.025844 |
| AP003774    | 5.250948 | -3.78641 | 0.003422 | 0.025845 |
| TBILA       | 1.093875 | 0.286662 | 0.003438 | 0.025931 |
| LINC00672   | 1.562726 | -1.03815 | 0.003442 | 0.025944 |
| SLC12A5-AS1 | -1.58337 | -1.49619 | 0.00347  | 0.026109 |
| AC012510    | 1.123589 | 0.19144  | 0.003491 | 0.026234 |
| AC232271    | -1.11267 | -0.29956 | 0.003493 | 0.026239 |
| TMCO1-AS1   | 1.16303  | 0.02399  | 0.003498 | 0.026266 |
| ZNF227      | 1.024968 | 3.884885 | 0.003503 | 0.026296 |
| PTMAP4      | 1.158963 | 0.094028 | 0.003556 | 0.026591 |
| AP000424    | -1.23961 | -0.64065 | 0.003561 | 0.026613 |
| PALMD       | 1.847881 | -1.45633 | 0.003573 | 0.026684 |
| CALHM2      | 1.12781  | -0.30723 | 0.003579 | 0.026699 |
| CCNT2-AS1   | 1.139624 | 0.445432 | 0.003588 | 0.026762 |
| AC009452    | 6.007242 | -3.32368 | 0.0036   | 0.026825 |
| GZMM        | 2.57619  | -2.04247 | 0.003604 | 0.026849 |
| TSPOAP1     | 6.022694 | -3.33753 | 0.003607 | 0.026862 |
| C3orf86     | -1.04188 | 1.045685 | 0.003636 | 0.027044 |
| TNFRSF14    | -1.04016 | 0.598045 | 0.003662 | 0.027209 |
| ANKRD53     | 2.993919 | -2.84147 | 0.003663 | 0.027209 |
| DBH         | -1.32869 | -0.69587 | 0.003668 | 0.027235 |
| TEX29       | 5.946874 | -3.3769  | 0.003683 | 0.027314 |

|            |          |          |          |          |
|------------|----------|----------|----------|----------|
| PYGO1      | 1.048394 | 1.209716 | 0.003709 | 0.027464 |
| ST8SIA3    | 5.71075  | -3.4926  | 0.003713 | 0.027479 |
| F13B       | 1.094576 | 0.821574 | 0.003713 | 0.027479 |
| RGMA       | 1.869228 | -0.58091 | 0.00372  | 0.027513 |
| KCNAB3     | 1.035414 | 0.084575 | 0.003721 | 0.027513 |
| TUBA3FP    | 1.036061 | 0.412623 | 0.003729 | 0.027559 |
| MAP1LC3A   | 3.307143 | -2.83689 | 0.003754 | 0.027694 |
| CDH4       | 1.067307 | 0.172915 | 0.003756 | 0.0277   |
| PAX5       | 5.892312 | -3.40967 | 0.003779 | 0.027818 |
| AC016642   | -1.0631  | 0.216323 | 0.003783 | 0.02784  |
| H2BC8      | 1.588879 | -0.41891 | 0.003818 | 0.028015 |
| SERPINE2   | 1.055972 | -0.12419 | 0.003853 | 0.028219 |
| AL359736   | -7.44032 | -2.29772 | 0.00386  | 0.028263 |
| AC016831   | 1.235319 | -1.02239 | 0.003912 | 0.028585 |
| AL033523   | 2.982889 | -3.05195 | 0.003937 | 0.028723 |
| CDC37P1    | -1.13653 | -0.16094 | 0.00396  | 0.028872 |
| FOXL2      | 3.48612  | -2.71337 | 0.003981 | 0.029003 |
| HMG3-AS1   | 1.105771 | 0.264818 | 0.003988 | 0.029041 |
| CTRB2      | 5.766795 | -3.49981 | 0.004059 | 0.029475 |
| RPS27AP8   | 5.200182 | -3.80969 | 0.004064 | 0.029504 |
| AC234031   | -5.77031 | -3.54674 | 0.004067 | 0.029516 |
| AC084734   | 5.763644 | -3.46022 | 0.00408  | 0.029582 |
| HLX        | 5.752373 | -3.48326 | 0.004105 | 0.02974  |
| ZNF433-AS1 | 1.80973  | -1.60505 | 0.004121 | 0.029836 |
| GSTA1      | 1.436996 | -0.20683 | 0.004131 | 0.029882 |
| TGFA       | 5.907994 | -3.40468 | 0.004148 | 0.029995 |
| TESK2      | -1.05698 | 0.904759 | 0.00415  | 0.029997 |
| LINC00242  | 1.277129 | -0.14003 | 0.004156 | 0.030033 |
| ZNF135     | 2.554352 | -1.60346 | 0.004199 | 0.030302 |
| GIPR       | -1.04656 | 1.900172 | 0.00423  | 0.030462 |
| C1orf210   | -2.00072 | -0.94058 | 0.004253 | 0.030598 |
| LINC01140  | -3.10791 | -2.62159 | 0.004301 | 0.030907 |
| EPB41L4A   | -5.05371 | -1.32972 | 0.004307 | 0.030945 |
| DUX4L9     | 5.132791 | -3.84926 | 0.004335 | 0.031118 |
| NOVA2      | -1.37835 | -0.9812  | 0.004339 | 0.031135 |
| WFIKKN2    | 5.769609 | -3.49968 | 0.004345 | 0.031171 |
| AL135925   | 1.190765 | -0.46256 | 0.004348 | 0.03118  |
| AKR1B1P7   | 5.831102 | -3.4057  | 0.00435  | 0.031182 |
| TBC1D29P   | 5.833577 | -3.42433 | 0.004369 | 0.031294 |
| ABCB6      | 1.044407 | 0.929264 | 0.004411 | 0.0315   |
| NTNG2      | 1.558738 | -1.1437  | 0.004416 | 0.031523 |
| SDAD1P1    | -1.08078 | 0.067543 | 0.004439 | 0.031662 |
| AL354920   | 1.159861 | 0.104697 | 0.004445 | 0.031675 |
| AL133477   | 1.402315 | -1.62112 | 0.004447 | 0.031675 |
| KRTAP5-AS1 | 2.298164 | -1.54819 | 0.004447 | 0.031675 |
| RIC3       | 2.705    | -2.30134 | 0.004448 | 0.031675 |
| MSX1       | 1.951484 | -1.61366 | 0.004448 | 0.031675 |
| CHRM5      | 2.165346 | -1.63354 | 0.004451 | 0.031676 |

|            |          |          |          |          |
|------------|----------|----------|----------|----------|
| H4C14      | 2.001642 | 1.905586 | 0.004451 | 0.031676 |
| AC099509   | -1.67251 | -1.38879 | 0.004494 | 0.031899 |
| CFP        | 2.997634 | -1.82776 | 0.004496 | 0.031906 |
| NME5       | 5.189193 | -3.81153 | 0.004498 | 0.031906 |
| CDHR1      | -5.79236 | -3.51878 | 0.004516 | 0.031985 |
| FP326651   | -1.96481 | -1.63478 | 0.004525 | 0.03203  |
| AC020893   | 3.560445 | -3.28948 | 0.004528 | 0.032042 |
| TEX35      | 1.616569 | -1.71951 | 0.004536 | 0.032071 |
| CCDC81     | 2.619581 | -1.90799 | 0.004548 | 0.032133 |
| H2AC14     | 1.478627 | -0.77568 | 0.004561 | 0.032218 |
| ZFP91-CNTF | -7.16427 | -2.47893 | 0.004565 | 0.032228 |
| FABP6      | -1.131   | -0.42836 | 0.004582 | 0.032312 |
| CT867976   | 5.745148 | -3.46429 | 0.004588 | 0.032338 |
| AC026803   | 1.516275 | -1.36022 | 0.004588 | 0.032338 |
| Z84466     | 6.596253 | -2.8882  | 0.004597 | 0.032376 |
| IRX4       | 5.859229 | -3.39903 | 0.004624 | 0.032529 |
| OBSCN-AS1  | -2.01513 | -1.33837 | 0.004638 | 0.032607 |
| KCNV2      | 2.626114 | -2.75523 | 0.004639 | 0.032607 |
| DNAJC5B    | 1.191415 | -0.23553 | 0.004643 | 0.032621 |
| ZNF84      | 1.344228 | 4.156989 | 0.004661 | 0.032697 |
| USP8P2     | 3.917626 | -3.58076 | 0.004673 | 0.032775 |
| NCOA4P2    | 5.698158 | -3.53723 | 0.004701 | 0.032919 |
| PTAFR      | -1.01004 | 0.885357 | 0.004702 | 0.032921 |
| CASKIN1    | -1.04997 | 0.434133 | 0.004708 | 0.032943 |
| LINC01176  | 3.223262 | -2.91167 | 0.00471  | 0.032944 |
| ZNF577     | 1.005284 | 1.113829 | 0.00472  | 0.033    |
| KRT86      | -1.12937 | 0.128379 | 0.004733 | 0.033058 |
| ZNF534     | 5.621676 | -3.5546  | 0.00476  | 0.033215 |
| ACTL7B     | 5.684198 | -3.51955 | 0.004782 | 0.033333 |
| RPS3AP2    | 5.209131 | -3.8078  | 0.004787 | 0.033355 |
| AL390026   | 5.148118 | -3.84621 | 0.004814 | 0.033523 |
| MROH2A     | 5.792879 | -3.49392 | 0.004816 | 0.033523 |
| AL441883   | 7.357774 | -2.26117 | 0.00482  | 0.033537 |
| AC007611   | -1.13747 | -0.18854 | 0.004856 | 0.033725 |
| H3C1       | 3.155244 | -2.201   | 0.004869 | 0.033779 |
| NRADDP     | 2.481483 | -2.25478 | 0.004901 | 0.033945 |
| SLC39A2    | 5.723476 | -3.51001 | 0.004923 | 0.034066 |
| DHH        | 5.747037 | -3.48366 | 0.004928 | 0.034093 |
| AC015912   | 1.42616  | -1.39483 | 0.004941 | 0.034172 |
| AC010285   | 5.305437 | -3.73748 | 0.004944 | 0.034184 |
| MIA        | 6.398941 | -3.00117 | 0.004956 | 0.034237 |
| YBX1P4     | 3.748808 | -3.19727 | 0.005013 | 0.034545 |
| CD22       | -1.26906 | -0.66799 | 0.005057 | 0.034768 |
| BTN3A3     | -1.22123 | 2.325094 | 0.005088 | 0.034936 |
| TSPY26P    | 1.378303 | 0.227152 | 0.005089 | 0.034936 |
| RGCC       | -2.69544 | -1.83467 | 0.005109 | 0.035054 |
| AL133390   | 1.882243 | -0.95778 | 0.005157 | 0.035272 |
| LINC00632  | -1.42254 | -1.41781 | 0.00518  | 0.035383 |



|             |          |          |          |          |
|-------------|----------|----------|----------|----------|
| CSNK1G2-AS1 | 5.771011 | -3.49878 | 0.00519  | 0.03541  |
| SLC2A12     | -1.81901 | 0.989977 | 0.005266 | 0.03582  |
| NDUFAF4P1   | 4.502601 | -3.20487 | 0.005301 | 0.035986 |
| PPIC-AS1    | 5.619558 | -3.55548 | 0.005315 | 0.036062 |
| HIGD2AP1    | 6.07487  | -3.30654 | 0.005333 | 0.036163 |
| RAB40AL     | 1.572003 | -0.95231 | 0.005351 | 0.036249 |
| PXDN        | -5.69086 | -3.58757 | 0.005362 | 0.03627  |
| GAU1        | 5.651329 | -3.52698 | 0.005365 | 0.036281 |
| PNMA5       | -5.67697 | -3.59063 | 0.005395 | 0.036408 |
| HEXA-AS1    | 1.65275  | -0.97875 | 0.005421 | 0.036559 |
| LYPD1       | 5.641556 | -3.5721  | 0.005429 | 0.036603 |
| AL772307    | 7.254877 | -2.32065 | 0.00544  | 0.036665 |
| AC092268    | -1.61957 | -1.85929 | 0.005454 | 0.03674  |
| LINC02067   | 4.454492 | -2.2437  | 0.005484 | 0.036901 |
| HTRA3       | 1.455968 | -1.59614 | 0.005486 | 0.036903 |
| FOXD4       | 2.183146 | -2.45365 | 0.005504 | 0.036995 |
| FAM3B       | 5.791974 | -3.49446 | 0.005532 | 0.037152 |
| C5orf24     | 1.717229 | 3.095007 | 0.005535 | 0.037156 |
| AC022217    | 2.287009 | -2.85895 | 0.005548 | 0.037228 |
| SLC52A1     | -5.72057 | -3.58139 | 0.005563 | 0.0373   |
| KCCAT198    | -5.78037 | -3.54467 | 0.005563 | 0.0373   |
| DLX6        | 5.238267 | -3.77606 | 0.005568 | 0.037322 |
| ESAM        | 1.0792   | -0.15402 | 0.005577 | 0.037366 |
| CNKSRI      | 1.354755 | 0.053516 | 0.005587 | 0.037401 |
| SOSTDC1     | -5.71687 | -3.55835 | 0.005606 | 0.037517 |
| KLHDC7B-DT  | 5.803094 | -3.43061 | 0.005629 | 0.037641 |
| ISM2        | -1.35229 | -1.22668 | 0.005692 | 0.037986 |
| AL031281    | -3.47281 | -0.82443 | 0.005695 | 0.037987 |
| AC131971    | 2.327774 | -2.46266 | 0.005703 | 0.038014 |
| NT5C1B      | -1.8722  | -2.27564 | 0.00572  | 0.038098 |
| FYN         | -1.12812 | 0.065755 | 0.005743 | 0.038201 |
| AC084880    | 1.58849  | -1.80276 | 0.005768 | 0.038352 |
| PRKAG2-AS1  | -1.44321 | -0.57255 | 0.005828 | 0.038673 |
| SH2D7       | -1.09441 | -0.63068 | 0.005839 | 0.038727 |
| WASIR1      | -5.56569 | -3.66316 | 0.005842 | 0.038728 |
| MMP19       | 1.032161 | 0.385175 | 0.005868 | 0.038853 |
| ACTL6B      | 5.70291  | -3.51482 | 0.005873 | 0.038879 |
| AC022816    | 2.375746 | -1.45067 | 0.005904 | 0.039006 |
| PAG1        | 1.880834 | -1.47319 | 0.005913 | 0.039059 |
| CENPVL1     | 5.157732 | -3.84438 | 0.005924 | 0.039121 |
| RPSAP55     | 1.450082 | -1.4988  | 0.005945 | 0.039239 |
| ABCA6       | -1.20723 | -0.83844 | 0.005958 | 0.039316 |
| EEF1AKMT3   | -1.08312 | 1.873907 | 0.005996 | 0.03953  |
| CXCR4       | 2.727372 | -2.53918 | 0.006034 | 0.039716 |
| HMGB1P31    | -1.85806 | -2.04058 | 0.00605  | 0.039792 |
| SDK2        | -1.32834 | -0.35047 | 0.006053 | 0.039802 |
| HEPH        | -1.16034 | -0.31274 | 0.006058 | 0.039824 |
| RNVU1-30    | 2.031585 | -1.99284 | 0.006092 | 0.040018 |

|           |          |          |          |          |
|-----------|----------|----------|----------|----------|
| JPH3      | 2.41965  | -1.41717 | 0.006093 | 0.040018 |
| TP53AIP1  | 5.595896 | -3.56067 | 0.00611  | 0.04012  |
| AC245041  | 1.731164 | -1.31082 | 0.006124 | 0.040203 |
| GPR135    | 1.026995 | 0.363087 | 0.006132 | 0.040244 |
| LBHD1     | -1.05207 | 5.391861 | 0.006142 | 0.040299 |
| RPSAP61   | 1.147126 | -0.70391 | 0.006156 | 0.040378 |
| RNU6-8    | 1.275615 | -1.02829 | 0.006164 | 0.040403 |
| PRR5L     | 5.573598 | -3.6102  | 0.006181 | 0.040466 |
| LINC01532 | 3.278386 | -2.86829 | 0.006194 | 0.040533 |
| PIANP     | -2.55919 | -1.92446 | 0.006204 | 0.040587 |
| AF196969  | -3.89082 | -1.75639 | 0.006214 | 0.040643 |
| TFDP3     | 3.345844 | -2.82375 | 0.006307 | 0.041149 |
| ARMS2     | 5.795876 | -3.45194 | 0.006332 | 0.04127  |
| SAG       | 5.606034 | -3.58071 | 0.006344 | 0.041324 |
| AL450384  | 1.154813 | -0.7705  | 0.006387 | 0.041561 |
| LRMDA     | -3.24612 | -3.01939 | 0.006436 | 0.04182  |
| HSF5      | 5.626944 | -3.55392 | 0.006473 | 0.042044 |
| AC080038  | 4.216321 | -3.62231 | 0.006478 | 0.042063 |
| LINC02361 | -1.93181 | -1.93015 | 0.00649  | 0.042118 |
| EEF1A1P3  | 5.166848 | -3.84302 | 0.0065   | 0.042173 |
| LINC01876 | -1.01036 | 0.332978 | 0.00654  | 0.042385 |
| MYH7B     | 1.219973 | -0.96122 | 0.006554 | 0.042446 |
| RHBDL1    | 1.492359 | -1.15348 | 0.006556 | 0.042446 |
| AC012254  | 2.248804 | -0.49662 | 0.006558 | 0.042449 |
| SYCE2     | -1.02531 | -0.33849 | 0.006574 | 0.042528 |
| BCHE      | -1.30924 | -0.32832 | 0.006639 | 0.042867 |
| TUBA3E    | 5.650248 | -3.56999 | 0.006649 | 0.042892 |
| TTC6      | 1.041227 | 0.023741 | 0.006657 | 0.042925 |
| AL450992  | 5.044482 | -3.90272 | 0.00667  | 0.042987 |
| FAM180B   | 5.804096 | -3.45112 | 0.006728 | 0.043293 |
| CASP16P   | -1.25919 | 0.225183 | 0.006744 | 0.043386 |
| AL670729  | 1.760135 | -2.11494 | 0.00676  | 0.043469 |
| SOCAR     | 5.534581 | -3.61879 | 0.006771 | 0.043524 |
| CCNA1     | 6.363937 | -3.08057 | 0.006847 | 0.043921 |
| GLS2      | -1.92591 | -1.7082  | 0.006869 | 0.044037 |
| CST7      | 5.545625 | -3.61644 | 0.006893 | 0.044156 |
| PGAM1P6   | 5.040451 | -3.89379 | 0.006909 | 0.04424  |
| YAP1P1    | 5.540761 | -3.59459 | 0.006938 | 0.04438  |
| ACRBP     | 2.798988 | -2.26739 | 0.006944 | 0.044404 |
| ANKLE1    | 1.303499 | -0.71924 | 0.00695  | 0.044418 |
| NPAS4     | 5.529818 | -3.6196  | 0.007005 | 0.044655 |
| HSPB7     | 5.731252 | -3.46803 | 0.007021 | 0.044715 |
| AC005775  | -1.68196 | -0.02421 | 0.007049 | 0.044842 |
| C1orf220  | 1.820279 | -0.26893 | 0.007084 | 0.045016 |
| PLAG1     | -1.06828 | 0.516402 | 0.007107 | 0.04512  |
| IMPDH1P8  | 1.271864 | -1.19158 | 0.007108 | 0.04512  |
| LINC02747 | 2.017093 | -1.46561 | 0.00711  | 0.04512  |
| CTRL      | 1.194944 | 0.629754 | 0.007133 | 0.045233 |

|               |          |          |          |          |
|---------------|----------|----------|----------|----------|
| AC016821      | -2.67011 | -2.71746 | 0.007137 | 0.045233 |
| C20orf203     | 5.612399 | -3.55667 | 0.007141 | 0.045246 |
| ANAPC1P6      | -6.50847 | -3.03663 | 0.007227 | 0.045701 |
| LINC02594     | -3.26471 | -2.97327 | 0.007227 | 0.045701 |
| LINC01087     | 1.340422 | -0.86822 | 0.007242 | 0.045757 |
| RPSAP2        | 5.586611 | -3.56255 | 0.007328 | 0.046203 |
| SLC13A2       | -1.54342 | -0.42616 | 0.007406 | 0.046593 |
| A2MP1         | 3.50474  | -2.69658 | 0.007421 | 0.046639 |
| AC131159      | 2.031383 | -2.55494 | 0.007441 | 0.046747 |
| SNORA50C      | 1.393575 | -1.3016  | 0.007488 | 0.047021 |
| CPAMD8        | -1.11747 | -0.14957 | 0.007511 | 0.047117 |
| AC020604      | 3.302989 | -2.88796 | 0.007568 | 0.047387 |
| CTAGE3P       | 1.203037 | -0.65912 | 0.007578 | 0.047417 |
| FOXG1-AS1     | 5.535563 | -3.59574 | 0.007608 | 0.047555 |
| PDE6B         | -1.52776 | -1.30944 | 0.007644 | 0.047716 |
| AC139149      | 3.197426 | -2.72195 | 0.007658 | 0.047754 |
| ZNF670-ZNF695 | 1.05428  | 0.002913 | 0.007666 | 0.047768 |
| NDUFB4P11     | 5.139892 | -3.84795 | 0.007744 | 0.048131 |
| FGF19         | -1.15836 | -0.9726  | 0.007769 | 0.048241 |
| HOXA11        | 5.563548 | -3.63561 | 0.007784 | 0.048284 |
| AL359182      | 5.521495 | -3.6446  | 0.007802 | 0.04836  |
| AL807752      | 2.227054 | -2.78007 | 0.007831 | 0.048515 |
| RFX4          | 5.496298 | -3.62645 | 0.007889 | 0.048822 |
| IL17RE        | 1.185099 | -1.02977 | 0.007895 | 0.048851 |
| NPM1P29       | 5.473914 | -3.65412 | 0.007913 | 0.048932 |
| LINC01436     | -5.42838 | -3.74277 | 0.007915 | 0.048934 |
| LINC00598     | -1.07435 | -0.19809 | 0.007959 | 0.049159 |
| BDKRB2        | -1.05462 | 5.480755 | 0.008098 | 0.049938 |
| NECTIN4       | 6.185028 | -3.17662 | 0.008108 | 0.049986 |

Table S7.1 Clinical characteristics for patients with small bowel vessel information in Cohort 1

| Clinical characteristics                                                   | Total (n = 82)   |
|----------------------------------------------------------------------------|------------------|
| Age, Median (Q1,Q3)                                                        | 61 (56, 64)      |
| Marriage, n (%)                                                            |                  |
| No                                                                         | 2 (2.44)         |
| Yes                                                                        | 80 (97.56)       |
| Sex, n (%)                                                                 |                  |
| Male                                                                       | 37 (45.12)       |
| Female                                                                     | 45 (54.88)       |
| Number of bleeding in 1 year before enrollement, n (%)                     |                  |
| 4                                                                          | 12 (14.63)       |
| 5                                                                          | 25 (30.49)       |
| 6                                                                          | 30 (36.59)       |
| 7                                                                          | 10 (12.2)        |
| 8                                                                          | 4 (4.88)         |
| 10                                                                         | 1 (1.22)         |
| Average Hb concentration in 1 year before enrollement (g/L), Mean $\pm$ SD | 81.7 $\pm$ 12.82 |

Table S7.2 Clinical characteristics for patients with small bowel vessel information in Cohort 2

| Variables           | Total (n = 10) |
|---------------------|----------------|
| Age, Median (Q1,Q3) | 59 (52.25, 69) |
| Marriage, n (%)     |                |
| No                  | 0 (0)          |
| Yes                 | 10 (100)       |
| Sex, n (%)          |                |
| Male                | 4 (40)         |
| Female              | 6 (60)         |

Table S7.3 Clinical characteristics for patients with small bowel vessel information in Cohort 3

| Variables           | Total (n = 30)    |
|---------------------|-------------------|
| Age, Median (Q1,Q3) | 62 (54.25, 65.75) |
| Marriage, n (%)     |                   |
| No                  | 1 (3.33)          |
| Yes                 | 29 (96.67)        |
| Sex, n (%)          |                   |
| Male                | 11 (36.67)        |
| Female              | 19 (63.33)        |

Table S8 Sequences of primers, siRNA, and shRNA used in the study.

| <b>Sequence of primers used for real-time PCR</b> |                          |                          |
|---------------------------------------------------|--------------------------|--------------------------|
| Gene                                              | Primer (Forward)         | Primer (Reverse)         |
| HGDILnc1 (MSTRG.64 31.1)                          | GCCTACCATTTCATTCTACCGT   | GGCAGACTCCAGAGGAAGTTA    |
| lnc-STK25-2:1                                     | GTGTGTTGGGTGTTGCGTATGTAC | ACAGCCCCAATACACACATGCC   |
| MSTRG.673 48                                      | TCACTCTTCTTTCCAGGCTGGAG  | GAGGCAGGAGAATCGCTTGAACC  |
| VEGFA                                             | AGGGCAGAATCATCACGAAGT    | AGGGTCTCGATTGGATGGCA     |
| TDGF1                                             | TTTGAAGTGGGATTAGTTGCCG   | GGGGCCAAATGCTGTCATCT     |
| ADAMTS9                                           | ATTAGAGACCCTGAGCGAATACG  | GAAGTGGACGTTCTGTGGGAA    |
| E2F2                                              | CGTCCCTGAGTTCCCAACC      | GCGAAGTGTTCATACCGAGTCTT  |
| SIM2                                              | CCATTTAGGCTTATCCCAGGTG   | GGTCATCTCATCGTGGTCAGA    |
| NeuroD1                                           | ATGACCAAATCGTACAGCGAG    | GTTTCATGGCTTCGAGGTCGT    |
| CBX2                                              | GCGAATTGAAGGGCTAAGA      | GGGCTTGGAGAGCTGTTAGTC    |
| ZFP57                                             | CAACATCCCAGTCTGAGAGATGA  | GGGTCTGTCCATAGTCCCA      |
| ZNF727                                            | TGGGAAATGCGAGTGCTAAC     | AGCTGGGTGTTTGGCTACTG     |
| ARX                                               | GTGCAAGGCTCCCCTAAGAG     | CGTTCTCGCGGTACGACTT      |
| ZNF716                                            | AAGGCGAGCGTTCAGAGTAA     | CGATAGAGTCAATGGCAGCTT    |
| L3MBTL4                                           | TGATCCCCGACATCCATCG      | GGCCTTCAAGTAATCCATCCAA   |
| NHLH2                                             | TTCATCCGCCACAAATCTTA     | TTCTGTGCCTTCCATCTCTATG   |
| NKX6-1                                            | AGGGCTCGTTTGGCCTATTC     | AGAGGCTTATTGTAGTCGTCGT   |
| TBXT                                              | TATGAGCCTCGAATCCACATAGT  | CCTCGTTCTGATAAGCAGTCAC   |
| $\beta$ -actin                                    | AGAGCCTCGCCTTTGCCGATCC   | CTGGGCCTCGTCGCCACATA     |
| HIF-1 $\alpha$                                    | GAACGTCGAAAAGAAAAGTCTCG  | CCTTATCAAGATGCGAACTCACA  |
| SLC2A1                                            | GGCCAAGAGTGTGCTAAAGAA    | ACAGCGTTGATGCCAGACAG     |
| SLC2A2                                            | GCTGCTCAACTAATCACCATGC   | TGGTCCCAATTTTGAAAACCCC   |
| SLC2A3                                            | GCTGGGCATCGTTGTTGGA      | GCACTTTGTAGGATAGCAGGAAG  |
| HK1                                               | GCTCTCCGATGAAACTCTCATAG  | GGACCTTACGAATGTTGGCAA    |
| HK2                                               | TGCCACCAGACTAAACTAGACG   | CCCGTGCCACAATGAGAC       |
| GPI                                               | CAAGGACCGCTTCAACCACTT    | CCAGGATGGGTGTGTTTGACC    |
| PFKL                                              | GTACCTGGCGCTGGTATCTG     | CCTCTCACACATGAAGTTCTCC   |
| PFKM                                              | GGTGCCCGTGTCTTCTTTGT     | AAGCATCATCGAAACGCTCTC    |
| PFKP                                              | CGCCTACCTCAACGTGGTG      | ACCTCCAGAACGAAGGTCTC     |
| PFKFB2                                            | AGTCCTACGACTTCTTTCCGC    | TCTCCTCAGTGAGATACGCCT    |
| PFKFB3                                            | TTGGCGTCCCCACAAAAGT      | AGTTGTAGGAGCTGTACTGCTT   |
| PFKFB4                                            | CAACATCGTGCAAGTGAAACTG   | GACTCGTAGGAGTTCTCATAGCA  |
| ALDOA                                             | ATGCCCTACCAATATCCAGCA    | GCTCCCAGTGGACTCATCTG     |
| ALDOC                                             | ATGCCTCACTCGTACCCAG      | TTTCCACCCAATTTGGCTCA     |
| PGK1                                              | TGGACGTTAAAGGGAAGCGG     | GCTCATAAGGACTACCGACTTGG  |
| ENO1                                              | GCCGTGAACGAGAAGTCCTG     | ACGCCTGAAGAGACTCGGT      |
| ENO2                                              | AGCCTCTACGGGCATCTATGA    | TTCTCAGTCCCATCCAACCTCC   |
| ENO3                                              | GGCTGGTTACCCAGACAAGG     | TCGTACTIONCCATTGCGATAGAA |
| PKLR                                              | TCAAGGCCGGGATGAACATTG    | CTGAGTGGGGAACCTGCAAAG    |
| <b>Sequence of siRNAs</b>                         |                          |                          |
| siRNA                                             | Forward                  | Reverse                  |

|                                                   |                                                                             |                                                             |
|---------------------------------------------------|-----------------------------------------------------------------------------|-------------------------------------------------------------|
| si-NC                                             | UUCUCCGAACGUGUCACGUTT                                                       | ACGUGACACGUUCGGAGAATT                                       |
| si-CBX2                                           | GCUGGUCCUCCAAACAUAATT                                                       | UUAUGUUUGGAGGACCAGCTT                                       |
| si-SIM2                                           | AGAUCAAGCUGUACAGUAATT                                                       | UUACUGUACAGCUUGAUCUTT                                       |
| si-ZNF716                                         | GAUUCAUACUGGAGAGAAATT                                                       | UUUCUCUCCAGUAUGAAUCTT                                       |
| si-ZNF727                                         | GUGCAAAGAAUGUGGCAAATT                                                       | UUUGCCACAUUCUUUGCACTT                                       |
| si-ARX                                            | CGGAGGAGCCCCGUGCAAATT                                                       | UUUUGCACGGGCUCCUCGTT                                        |
| si-L3MBTL4                                        | GUUGAUGACCAAAGAGUAATT                                                       | UUACUCUUUGGUCAUCAACTT                                       |
| si-NHLH2                                          | GCGUGGAAGCCUUAACUUTT                                                        | AAGUUGAAGGCUUCCACGCTT                                       |
| si-TBXT                                           | GGAAGAAGUGAUCACAAATT                                                        | UUUGUGAUCACUUCUUUCCTT                                       |
| si-NKX6.1                                         | ACAAAGACGGGAAGAGAAATT                                                       | UUUCUCUCCCCGUCUUUGUTT                                       |
| si-ZFP57                                          | GAAAGAGCUUCGAGAACAATT                                                       | UUGUUCUCGAAGCUCUUUCTT                                       |
| si-NEUROD1                                        | GCAACUUCUCUUUCAACATT                                                        | UGUUUGAAAGAGAAGUUGCTT                                       |
| shNC                                              | GATCCGTTCTCCGAACGTGTCACGTAATTCAAGAGATTACGTGACACGTT<br>CGGAGAATTTTTTC        |                                                             |
| shHGDILnc 1 #1                                    | GATCCGCTGGAATGTGGGCCTACCATTCAATTTCAAGAGAATGAATGGTAG<br>GCCACATTCCAGCTTTTTTG |                                                             |
| shHGDILnc 1 #2                                    | GATCCGATACTAACTCTGACAGCATCTTGATTCAAGAGATCAAGATGCTG<br>TCAGAGTTAGTATCTTTTTTG |                                                             |
| si-NC                                             | UUCUCCGAACGUGUCACGUTT                                                       | ACGUGACACGUUCGGAGAATT                                       |
| si-ENO1 #1                                        | CCAGACCAUUAAGUAUAUTT                                                        | AUAUACUAAAUGGGUCUGGTT                                       |
| si-ENO1 #2                                        | GCUGCAGGUGUGUCAUUUATT                                                       | UAAAUGACACACCUGCAGCTT                                       |
| si-ALDOC #1                                       | GCCUGUCCAUCAAGUAUAUTT                                                       | UAUACUUGAUGGGACAGGCTT                                       |
| si-ALDOC #2                                       | CUACCAGAAAGAUGAUAAUTT                                                       | AUUAUCAUCUUUCUGGUAGTT                                       |
| <b>Sequence of primers used for ChIP-PCR</b>      |                                                                             |                                                             |
| HGDILnc1 P1                                       | TGAAGCAACACACCAAGCACC                                                       | ACTCTAGCGGACCATGCTGT                                        |
| HGDILnc1 P2                                       | AGGCAAAAAGACGATGGTGCA                                                       | CACATGTGTAATCCATGAGGCAAG<br>A                               |
| HGDILnc1 P3                                       | GCTCATAGCACGACAAAGTTGC                                                      | TCAAATGATTAGAAAATAAATGG<br>CT                               |
| HGDILnc1 P4                                       | ACTGAGGTTCCCAGACTGGC                                                        | GCTGGGCAGTTCTCTACTTTTCC                                     |
| HGDILnc1 P5                                       | GCATGCCATAGATACAGATTTCCG<br>T                                               | GTGAGAAGAGTTGCTCAGTTGTTCT<br>TCAAGCTGGAATATACTTGACCGTC<br>A |
| HGDILnc1 P6                                       | AGCTACTTGCCCTGCCCTCA                                                        |                                                             |
| HGDILnc1 P7                                       | AAATGAGTCATAAAGGTGCAGT<br>CA                                                | ATTCTCAAACATCCCGCACG                                        |
| P53 Promoter                                      | TGAAAGCACTGTGTTCTTAG                                                        | AACTCCCAGCAGCCACGAGGA                                       |
| ALDOC promoter                                    | GGGTGAGGACAGAGAAGCTCA                                                       | GGCCATGACCTTGCGTTCAT                                        |
| ALDOC promoter for RNA POLL II binding            | GAGGGCAGTCCCTAACAGC                                                         | GTAAATGAGGCTGCGGATGT                                        |
| <b>Sequence of primers used for HGDILnc1 RACE</b> |                                                                             |                                                             |
| 5'-RACE R1                                        | CAGGTGAGAAAACGGAGGCATAGAGCAT                                                |                                                             |
| 5'-RACE R2                                        | GGAGGGTTGAGCCAGGTTTTGGGT                                                    |                                                             |

|                   |                                |  |
|-------------------|--------------------------------|--|
| 3'-RACE F1        | CCCTAGCATTCTAGGACAGCACCATATAAG |  |
| 3'-RACE F2        | GACAGGCTGAGTTTGAAGAACAACCTC    |  |
| mMSTRG.6<br>431-F | GGAATGTGGGCCTACCATT            |  |
| mMSTRG.6<br>431-R | CTGATGTGAGAAGGAGCTGAA          |  |

Table S8. Antibodies used in the study

| Antibodies     | Source                    | Identifier |
|----------------|---------------------------|------------|
| CD31           | Abcam                     | ab76533    |
| ENO1           | Proteintech               | 11204-1-AP |
| NeuroD1        | Cell Signaling Technology | 4373S      |
| ALDOC          | Proteintech               | 14884-1-AP |
| HIF1a          | Proteintech               | 20960-1-AP |
| SLC2A1         | Abcam                     | ab115730   |
| H2B            | Abcam                     | ab1790     |
| FLAG-tag       | MBL                       | M185-3     |
| MYC-tag        | Cell Signaling Technology | 2365       |
| H2BK5ac        | Cell Signaling Technology | 12799      |
| H2BK12ac       | Active Motif              | 39669      |
| H2BK15ac       | Active Motif              | 61322      |
| H2BK16ac       | Active Motif              | 39122      |
| H2BK20ac       | Active Motif              | ab177430   |
| RNA POL II     | Active Motif              | 39497      |
| SUMO1          | Abcam                     | ab133352   |
| SUMO2/3        | Abcam                     | ab81371    |
| Ubiquitin      | Cell Signaling Technology | 3936       |
| HK2            | Santa cruz biotechnology  | sc-374169  |
| GPI            | Santa cruz biotechnology  | sc-271459  |
| PFKL           | Santa cruz biotechnology  | sc-393713  |
| PFKP           | Proteintech               | 13389-1-AP |
| PFKFB3         | Proteintech               | 13763-1-AP |
| ALDOA          | Santa cruz biotechnology  | sc-390733  |
| PGK1           | Santa cruz biotechnology  | sc-130335  |
| ENO2           | Proteintech               | 10149-1-AP |
| ENO3           | Santa cruz biotechnology  | sc-100811  |
| PKLR           | Santa cruz biotechnology  | sc-133222  |
| $\beta$ -actin | KangChen                  | KC-5A08    |
